# Supplementary material for: De novo Powered Air-Purifying Respirator Design and Fabrication for Pandemic Response
Source: bioRxiv or medRxiv preprint supplement (doi:10.1101/2021.03.25.21252076), 2021-03-29
Supplement: Supplementary file [file media-4.zip]

## Bill of Materials for PanFab Commercial PAPR Design

Akshay Kothakonda<sup>1,2,\*</sup>, Lyla Atta<sup>1,3,\*</sup>, Deborah Plana<sup>1,4,5,\*</sup>, Ferrous Ward<sup>1,2,\*</sup>, Chris Davis<sup>1,6</sup>, Avilash Cramer<sup>1,5</sup>, Robert Moran<sup>1,7</sup>, Jacob Freake<sup>1,8</sup>, Enze Tian<sup>1,9</sup>, Ofer Mazon<sup>1,10</sup>, Pavel Gorelik<sup>1,10</sup>, Christopher Van<sup>1,11</sup>, Christopher Hansen<sup>1,12</sup>, Helen Yang<sup>1,13</sup>, Michael S. Sinha<sup>1,13</sup>, Ju Li<sup>1,14</sup>, Sherry H. Yu<sup>1,15</sup>, Nicole R. LeBoeuf<sup>1,16,†</sup>, Peter K. Sorger<sup>1,4,†</sup>

<sup>1</sup> Greater Boston Pandemic Fabrication Team (PanFab) c/o Harvard-MIT Center for Regulatory Science, Harvard Medical School, Boston, MA, USA

<sup>2</sup> Department of Aeronautics and Astronautics, MIT, Cambridge, MA, USA

<sup>3</sup> Johns Hopkins University School of Medicine, Baltimore, MD, USA

<sup>4</sup> Harvard Ludwig Cancer Research Center and Department of Systems Biology, Harvard Medical School, Boston, MA, USA

<sup>5</sup> Harvard-MIT Division of Health Sciences & Technology, Cambridge, MA, USA

<sup>6</sup> GenOne Technologies, Cambridge, MA, USA

<sup>7</sup> Mine Survival, Panama City Beach, FL, USA

<sup>8</sup> Fikst Product Development, Woburn, MA, USA

<sup>9</sup> Beijing Key Laboratory of Indoor Air Quality Evaluation and Control, Department of Building Science, Tsinghua University, Beijing, China

<sup>10</sup> Research Instrumentation Core Facility, Harvard Medical School, Boston, MA, USA

<sup>11</sup> Borobot, Middleborough, MA, USA

<sup>12</sup> Harvard Graduate School of Design, Cambridge, MA, USA

<sup>13</sup> Harvard-MIT Center for Regulatory Science, Harvard Medical School, Boston MA, USA

<sup>14</sup> Department of Nuclear Science and Engineering and Department of Materials Science and Engineering, MIT, Cambridge, MA, USA

<sup>15</sup> Department of Dermatology, Yale School of Medicine, New Haven, CT USA

<sup>16</sup> Department of Dermatology, Center for Cutaneous Oncology, Brigham and Women's Hospital and Dana-Farber Cancer Institute, Boston, MA, USA

\*These authors contributed equally to this work

†Co-corresponding authors. E-mails: [nleboeuf@bwh.harvard.edu](mailto:nleboeuf@bwh.harvard.edu); [peter\\_sorger@hms.harvard.edu](mailto:peter_sorger@hms.harvard.edu) cc: [Maureen\\_Bergeron@hms.harvard.edu](mailto:Maureen_Bergeron@hms.harvard.edu);

### ORCID IDs:

Akshay Kothakonda, 0000-0001-5424-4228

Lyla Atta, 0000-0002-6113-0082

Deborah Plana, 0000-0002-4218-1693

Avilash Cramer, 0000-0003-0014-8921

Jacob Freake, 0000-0002-5198-835X

Enze Tian, 0000-0001-6410-5360

Christopher Van, 0000-0003-3262-964X

Christopher Hansen, 0000-0002-6640-2745

Ju Li, PhD, 0000-0002-7841-8058

Helen Yang, 0000-0002-9455-5300

Michael S. Sinha 0000-0002-9165-8611

Sherry H. Yu: 0000-0002-1432-9128

Nicole R. LeBoeuf, MD, MPH, 0000-0002-8264-834X

Peter Sorger, PhD, 0000-0002-3364-1838

Following are the parts used in the PanFab Commercial PAPR Design. The estimated costs assume a total production run of 2000 units.

| S. No. | Item                         | Qty. | Supplier/Method                | Part No.                                          | Estimated cost (\$)        |
|--------|------------------------------|------|--------------------------------|---------------------------------------------------|----------------------------|
| 1      | Enclosure                    | 1    | Pelican                        | V100 Vault                                        | 40                         |
| 2      | Threaded Inserts for Filter  | 2    | ABS Molding                    | N/A                                               | 6 (Tooling Cost = 6645)    |
| 3      | Threaded Insert for Hose     | 1    | ABS Molding                    | N/A                                               | 2.80 (Tooling Cost = 6846) |
| 4      | Blower, Centrifugal          | 1    | Delta Electronics              | BFB1012HD-04D4L                                   | 36                         |
| 5      | Battery pack, 12V NiMH       | 1    | Tenergy                        | Amazon Standard Identification Number: B077Y9HNTF | 23                         |
| 6      | Controller                   | 1    | Arduino                        | R3                                                | 23                         |
| 7      | PCB Shield                   | 1    | OSH Park                       | N/A                                               | 9.50                       |
| 8      | Differential Pressure Sensor | 1    | Sensirion                      | SDP810-500PA                                      | 19                         |
| 9      | Buzzer                       | 1    | Mallory Sonalert Products      | PS-580Q                                           | 5                          |
| 10     | Potentiometer                | 1    | Bourns Inc.                    | 93R1A-R22-A12L                                    | 3                          |
| 11     | Transistor                   | 1    | ON Semiconductor               | 2N3904BU                                          | 0.20                       |
| 12     | Resistor                     | 1    | Vishay BC Semiconductor        | PR02000201001JR500                                | 0.32                       |
| 13     | Electrical connector         | 1    | TE Connectivity AMP Connectors | 1-2834184-3                                       | 1.40                       |
| 14     | Venturi                      | 1    | BPE Inc.                       | 178-71-2                                          | 0.54                       |
| 15     | Venturi Ports                | 2    | Car-Anth Manufacturing         | 16-1204-2                                         | 0.68 (Tooling)             |

|              |                                  |   |                          |                                  |                            |
|--------------|----------------------------------|---|--------------------------|----------------------------------|----------------------------|
|              |                                  |   |                          |                                  | Cost = 375)                |
| 16           | Blower silicone tube             | 1 | McMaster-Carr            | 3038K29                          | N/A                        |
| 17           | Venturi silicone tube            | 2 | McMaster-Carr            | 3038K12                          | N/A                        |
| 18           | Blower adapter                   | 1 | ABS 3D printing          | N/A                              | 6                          |
| 20           | Switch                           | 1 | McMaster-Carr            | 8002K114                         | 28                         |
| 21           | Switch Cover                     | 1 | McMaster-Carr            | 70205K4                          | 4.40                       |
| 22           | Gaskets for threaded connections | 4 | McMaster-Carr            | 5647K62                          | 3                          |
| 23           | Waist strap                      | 1 | Skil-Care                | PathoShield Gait Belt            | 11                         |
| 24           | Filter                           | 2 | Milwaukee                | 49-90-1900                       | 40                         |
| 25           | Filter Adapter                   | 2 | ABS Injection molding    | N/A                              | 6 (Tooling Cost = 6846)    |
| 26           | Filter Cover                     | 2 | ABS Injection molding    | N/A                              | 8 (Tooling Cost = 18345)   |
| 27           | Hose adapter                     | 2 | ABS Injection molding    | N/A                              | 6.60 (Tooling Cost = 9997) |
| 28           | Hose                             | 1 | Flexaust                 | Flex-Tube PU-IH, PN: 33800125000 | 8.50                       |
| 29           | Hood coupler                     | 1 | ABS Injection molding    | N/A                              | 3.30 (Tooling Cost = 7456) |
| 30           | Locking ring                     | 1 | ABS Injection molding    | N/A                              | 2.70 (Tooling Cost = 5156) |
| 31           | Hood                             | 1 | University of Washington | VHA ADAPT PAPR Hood              | 30                         |
| <b>Total</b> |                                  |   |                          |                                  | <b>327.94</b>              |

Notes:

1. Several costs are unofficial quotes

2. Tooling cost for machining the Pelican case and joining the threaded inserts (Items 2 and 3) are TBD
