# Supplementary material for: De novo Powered Air-Purifying Respirator Design and Fabrication for Pandemic Response
Source: medRxiv preprint, doi:10.1101/2021.03.25.21252076, version 1 (2021-03-29)
Supplement: Supplementary Material 4 [file 252076_file05.zip]

Archive with 108 entries (82 files):
- Supplementary Material 4/3D Printing Instructions/
- Supplementary Material 4/3D Printing Instructions/3D Printing Instructions.pdf
- Supplementary Material 4/Arduino Code/
- Supplementary Material 4/Arduino Code/Libraries/
- Supplementary Material 4/Arduino Code/Libraries/arduino-sdp-0.0.6/
- Supplementary Material 4/Arduino Code/Libraries/arduino-sdp-0.0.6/arduino-sdp-0.0.6/
- Supplementary Material 4/Arduino Code/Libraries/arduino-sdp-0.0.6/arduino-sdp-0.0.6/examples/
- Supplementary Material 4/Arduino Code/Libraries/arduino-sdp-0.0.6/arduino-sdp-0.0.6/examples/sdp3x_default_address/
- Supplementary Material 4/Arduino Code/Libraries/arduino-sdp-0.0.6/arduino-sdp-0.0.6/examples/sdp3x_default_address/sdp3x_default_address.ino
- Supplementary Material 4/Arduino Code/Libraries/arduino-sdp-0.0.6/arduino-sdp-0.0.6/examples/sdp3x_manual_address/
- Supplementary Material 4/Arduino Code/Libraries/arduino-sdp-0.0.6/arduino-sdp-0.0.6/examples/sdp3x_manual_address/sdp3x_manual_address.ino
- Supplementary Material 4/Arduino Code/Libraries/arduino-sdp-0.0.6/arduino-sdp-0.0.6/examples/sdp8xx/
- Supplementary Material 4/Arduino Code/Libraries/arduino-sdp-0.0.6/arduino-sdp-0.0.6/examples/sdp8xx/sdp8xx.ino
- Supplementary Material 4/Arduino Code/Libraries/arduino-sdp-0.0.6/arduino-sdp-0.0.6/i2chelper.cpp
- Supplementary Material 4/Arduino Code/Libraries/arduino-sdp-0.0.6/arduino-sdp-0.0.6/i2chelper.h
- Supplementary Material 4/Arduino Code/Libraries/arduino-sdp-0.0.6/arduino-sdp-0.0.6/keywords.txt
- Supplementary Material 4/Arduino Code/Libraries/arduino-sdp-0.0.6/arduino-sdp-0.0.6/library.properties
- Supplementary Material 4/Arduino Code/Libraries/arduino-sdp-0.0.6/arduino-sdp-0.0.6/LICENSE
- Supplementary Material 4/Arduino Code/Libraries/arduino-sdp-0.0.6/arduino-sdp-0.0.6/README.md
- Supplementary Material 4/Arduino Code/Libraries/arduino-sdp-0.0.6/arduino-sdp-0.0.6/sdpsensor.cpp
- Supplementary Material 4/Arduino Code/Libraries/arduino-sdp-0.0.6/arduino-sdp-0.0.6/sdpsensor.h
- Supplementary Material 4/Arduino Code/Libraries/arduino-softpwm-master/
- Supplementary Material 4/Arduino Code/Libraries/arduino-softpwm-master/arduino-softpwm-master/
- Supplementary Material 4/Arduino Code/Libraries/arduino-softpwm-master/arduino-softpwm-master/.gitignore
- Supplementary Material 4/Arduino Code/Libraries/arduino-softpwm-master/arduino-softpwm-master/examples/
- Supplementary Material 4/Arduino Code/Libraries/arduino-softpwm-master/arduino-softpwm-master/examples/BlowerPWM/
- Supplementary Material 4/Arduino Code/Libraries/arduino-softpwm-master/arduino-softpwm-master/examples/BlowerPWM/BlowerPWM.ino
- Supplementary Material 4/Arduino Code/Libraries/arduino-softpwm-master/arduino-softpwm-master/examples/SoftPWM_example/
- Supplementary Material 4/Arduino Code/Libraries/arduino-softpwm-master/arduino-softpwm-master/examples/SoftPWM_example/SoftPWM_example.ino
- Supplementary Material 4/Arduino Code/Libraries/arduino-softpwm-master/arduino-softpwm-master/keywords.txt
- Supplementary Material 4/Arduino Code/Libraries/arduino-softpwm-master/arduino-softpwm-master/library.properties
- Supplementary Material 4/Arduino Code/Libraries/arduino-softpwm-master/arduino-softpwm-master/README.md
- Supplementary Material 4/Arduino Code/Libraries/arduino-softpwm-master/arduino-softpwm-master/src/
- Supplementary Material 4/Arduino Code/Libraries/arduino-softpwm-master/arduino-softpwm-master/src/SoftPWM.h
- Supplementary Material 4/Arduino Code/Master Codes/
- Supplementary Material 4/Arduino Code/Master Codes/MasterCode_Custom Design.ino
- Supplementary Material 4/Arduino Code/Master Codes/MasterCode_Pelican Design.ino
- Supplementary Material 4/Arduino Code/Master Codes/README.txt
- Supplementary Material 4/Assembly Instructions/
- Supplementary Material 4/Assembly Instructions/Assembly Instructions- PanFab Commercial Blower Unit.pdf
- Supplementary Material 4/Assembly Instructions/Assembly Instructions- PanFab Custom Blower Unit.pdf
- Supplementary Material 4/Bill of Materials/
- Supplementary Material 4/Bill of Materials/Commercial Design.pdf
- Supplementary Material 4/Bill of Materials/Custom Design.pdf
- Supplementary Material 4/CAD Files/
- Supplementary Material 4/CAD Files/Commercial Milwaukee Filter/
- Supplementary Material 4/CAD Files/Commercial Milwaukee Filter/Filter Adapter.step
- Supplementary Material 4/CAD Files/Commercial Milwaukee Filter/Filter Cover.step
- Supplementary Material 4/CAD Files/Commercial Milwaukee Filter/README.txt
- Supplementary Material 4/CAD Files/Custom Design/
- Supplementary Material 4/CAD Files/Custom Design/Blower Adapter.step
- Supplementary Material 4/CAD Files/Custom Design/Bottom.step
- Supplementary Material 4/CAD Files/Custom Design/Custom Case Blower Mount.step
- Supplementary Material 4/CAD Files/Custom Design/Hood Coupler.step
- Supplementary Material 4/CAD Files/Custom Design/Hose Adapter.step
- Supplementary Material 4/CAD Files/Custom Design/Lid.step
- Supplementary Material 4/CAD Files/Custom Design/Locking Ring.step
- Supplementary Material 4/CAD Files/Custom Design/README.txt
- Supplementary Material 4/CAD Files/Custom Design/Venturi Port.stp
- Supplementary Material 4/CAD Files/Custom Design/Venturi.stp
- Supplementary Material 4/CAD Files/Custom Filter/
- Supplementary Material 4/CAD Files/Custom Filter/Custom Filter Housing.step
- Supplementary Material 4/CAD Files/Custom Filter/Custom Filter Lid.step
- Supplementary Material 4/CAD Files/Custom Filter/README.txt
- Supplementary Material 4/CAD Files/Pelican Case Design/
- Supplementary Material 4/CAD Files/Pelican Case Design/Blower Adapter.step
- Supplementary Material 4/CAD Files/Pelican Case Design/Blower Mount.step
- Supplementary Material 4/CAD Files/Pelican Case Design/Filter Insert.step
- Supplementary Material 4/CAD Files/Pelican Case Design/Hood Coupler.step
- Supplementary Material 4/CAD Files/Pelican Case Design/Hose Adapter.step
- Supplementary Material 4/CAD Files/Pelican Case Design/Hose Insert.step
- Supplementary Material 4/CAD Files/Pelican Case Design/Locking Ring.step
- Supplementary Material 4/CAD Files/Pelican Case Design/Pelican Case PAPR Assembly.step
- Supplementary Material 4/CAD Files/Pelican Case Design/README.txt
- Supplementary Material 4/CAD Files/Pelican Case Design/Venturi Port.stp
- Supplementary Material 4/CAD Files/Pelican Case Design/Venturi.stp
- Supplementary Material 4/CAD Files/Pelican Case Design/Waist Strap Loop.step
- Supplementary Material 4/Custom Arduino Shield Design/
- Supplementary Material 4/Custom Arduino Shield Design/DESCRIPTION
- Supplementary Material 4/Custom Arduino Shield Design/eagle.epf
- Supplementary Material 4/Custom Arduino Shield Design/README.txt
- Supplementary Material 4/Custom Arduino Shield Design/Shield_Schematic.b#1
- Supplementary Material 4/Custom Arduino Shield Design/Shield_Schematic.b#2
- Supplementary Material 4/Custom Arduino Shield Design/Shield_Schematic.b#3
- Supplementary Material 4/Custom Arduino Shield Design/Shield_Schematic.b#4
- Supplementary Material 4/Custom Arduino Shield Design/Shield_Schematic.b#5
- Supplementary Material 4/Custom Arduino Shield Design/Shield_Schematic.b#6
- Supplementary Material 4/Custom Arduino Shield Design/Shield_Schematic.b#7
- Supplementary Material 4/Custom Arduino Shield Design/Shield_Schematic.b#8
- Supplementary Material 4/Custom Arduino Shield Design/Shield_Schematic.b#9
- Supplementary Material 4/Custom Arduino Shield Design/Shield_Schematic.brd
- Supplementary Material 4/Custom Arduino Shield Design/Shield_Schematic.pdf
- Supplementary Material 4/Custom Arduino Shield Design/Shield_Schematic.s#1
- Supplementary Material 4/Custom Arduino Shield Design/Shield_Schematic.s#2
- Supplementary Material 4/Custom Arduino Shield Design/Shield_Schematic.s#3
- Supplementary Material 4/Custom Arduino Shield Design/Shield_Schematic.s#4
- Supplementary Material 4/Custom Arduino Shield Design/Shield_Schematic.s#5
- Supplementary Material 4/Custom Arduino Shield Design/Shield_Schematic.s#6
- Supplementary Material 4/Custom Arduino Shield Design/Shield_Schematic.s#7
- Supplementary Material 4/Custom Arduino Shield Design/Shield_Schematic.s#8
- Supplementary Material 4/Custom Arduino Shield Design/Shield_Schematic.s#9
- Supplementary Material 4/Custom Arduino Shield Design/Shield_Schematic.sch
- Supplementary Material 4/Custom Arduino Shield Design/Shield_Schematic_NoInfo.pdf
- Supplementary Material 4/Labels, warnings, and legal disclaimer/
- Supplementary Material 4/Labels, warnings, and legal disclaimer/Labels, warnings, legal.pdf
- Supplementary Material 4/README.txt
- Supplementary Material 4/Use Instructions/
- Supplementary Material 4/Use Instructions/PanFab PAPR User Instructions.pdf
