# Supplementary material for: De novo Powered Air-Purifying Respirator Design and Fabrication for Pandemic Response
Source: medRxiv preprint, doi:10.1101/2021.03.25.21252076, version 1 (2021-03-29)
Supplement: Supplementary Material 4 [file 252076_file05.zip › Supplementary Material 4/Arduino Code/Libraries/arduino-sdp-0.0.6/arduino-sdp-0.0.6/keywords.txt]

#######################################
# Syntax Coloring Map For arduino-scd
#######################################

#######################################
# Datatypes (KEYWORD1)
#######################################

SDP3XSensor	KEYWORD1
SDP8XXSensor	KEYWORD1

#######################################
# Methods and Functions (KEYWORD2)
#######################################

init	KEYWORD2
readSample	KEYWORD2
getDifferentialPressure		KEYWORD2
getHumidity	KEYWORD2
getTemperature	KEYWORD2

#######################################
# Instances (KEYWORD2)
#######################################

#######################################
# Constants (LITERAL1)
#######################################
