# Supplementary material for: De novo Powered Air-Purifying Respirator Design and Fabrication for Pandemic Response
Source: medRxiv preprint, doi:10.1101/2021.03.25.21252076, version 1 (2021-03-29)
Supplement: Supplementary Material 4 [file 252076_file05.zip › Supplementary Material 4/Arduino Code/Libraries/arduino-sdp-0.0.6/arduino-sdp-0.0.6/library.properties]

name=arduino-sdp
version=0.0.6
author=Johannes Winkelmann
maintainer=Johannes Winkelmann <jwi@sensirion.com>
sentence=Support for Sensirion's Differential Pressure sensors
paragraph=Supported sensors: SDP3x, SDP8xx
category=Sensors
url=https://developer.sensirion.com
architectures=*
includes=sdpsensor.h
