# Supplementary material for: De novo Powered Air-Purifying Respirator Design and Fabrication for Pandemic Response
Source: medRxiv preprint, doi:10.1101/2021.03.25.21252076, version 1 (2021-03-29)
Supplement: Supplementary Material 4 [file 252076_file05.zip › Supplementary Material 4/Arduino Code/Libraries/arduino-softpwm-master/arduino-softpwm-master/library.properties]

name=arduino-softpwm
version=1.0.1
author=Victor Tseng <palatis@gmail.com>
maintainer=Victor Tseng <palatis@gmail.com>
sentence=Software PWM library for Arduino.
paragraph=Provides PWM on any pin.
category=Signal Input/Output
url=https://github.com/Palatis/arduino-softpwm
architectures=avr
