# Supplementary material for: De novo Powered Air-Purifying Respirator Design and Fabrication for Pandemic Response
Source: medRxiv preprint, doi:10.1101/2021.03.25.21252076, version 1 (2021-03-29)
Supplement: Supplementary Material 4 [file 252076_file05.zip › Supplementary Material 4/CAD Files/Custom Design/Bottom.step]

ISO-10303-21;
HEADER;
/* Generated by software containing ST-Developer
 * from STEP Tools, Inc. (www.steptools.com) 
 */

FILE_DESCRIPTION(
/* description */ (''),
/* implementation_level */ '2;1');

FILE_NAME(
/* name */ 'C:/Users/ferro/Desktop/MIT PAPR/PAPR Bottom.step',
/* time_stamp */ '2020-10-05T17:06:10-04:00',
/* author */ (''),
/* organization */ (''),
/* preprocessor_version */ 'ST-DEVELOPER v18.1',
/* originating_system */ 'Autodesk Translation Framework v9.3.0.1241',
/* authorisation */ '');

FILE_SCHEMA (('AUTOMOTIVE_DESIGN { 1 0 10303 214 3 1 1 }'));
ENDSEC;

DATA;
#10=MECHANICAL_DESIGN_GEOMETRIC_PRESENTATION_REPRESENTATION('',(#21),#62711);
#11=ITEM_DEFINED_TRANSFORMATION($,$,#14026,#15211);
#12=ITEM_DEFINED_TRANSFORMATION($,$,#14025,#15212);
#13=(
REPRESENTATION_RELATIONSHIP($,$,#62726,#62725)
REPRESENTATION_RELATIONSHIP_WITH_TRANSFORMATION(#11)
SHAPE_REPRESENTATION_RELATIONSHIP()
);
#14=(
REPRESENTATION_RELATIONSHIP($,$,#62725,#62724)
REPRESENTATION_RELATIONSHIP_WITH_TRANSFORMATION(#12)
SHAPE_REPRESENTATION_RELATIONSHIP()
);
#15=CONTEXT_DEPENDENT_SHAPE_REPRESENTATION(#13,#62722);
#16=CONTEXT_DEPENDENT_SHAPE_REPRESENTATION(#14,#62723);
#17=NEXT_ASSEMBLY_USAGE_OCCURRENCE(
'bottom with gasket recess 200926 v2:2',
'bottom with gasket recess 200926 v2:2',
'bottom with gasket recess 200926 v2:2',#62729,#62730,
'bottom with gasket recess 200926 v2:2');
#18=NEXT_ASSEMBLY_USAGE_OCCURRENCE('Case Components:1',
'Case Components:1','Case Components:1',#62728,#62729,
'Case Components:1');
#19=SHAPE_REPRESENTATION_RELATIONSHIP('SRR','None',#62726,#20);
#20=ADVANCED_BREP_SHAPE_REPRESENTATION('',(#22),#62710);
#21=STYLED_ITEM('',(#62744),#22);
#22=MANIFOLD_SOLID_BREP('Body1',#14011);
#23=SPHERICAL_SURFACE('',#14465,0.250000000000004);
#24=SPHERICAL_SURFACE('',#14473,0.250000000000004);
#25=SPHERICAL_SURFACE('',#14477,0.250000000000004);
#26=SPHERICAL_SURFACE('',#14479,0.250000000000004);
#27=SPHERICAL_SURFACE('',#14627,0.250000000000004);
#28=SPHERICAL_SURFACE('',#14635,0.250000000000004);
#29=SPHERICAL_SURFACE('',#14639,0.250000000000004);
#30=SPHERICAL_SURFACE('',#14641,0.250000000000004);
#31=SPHERICAL_SURFACE('',#14841,0.250000000000004);
#32=SPHERICAL_SURFACE('',#14849,0.250000000000004);
#33=SPHERICAL_SURFACE('',#14853,0.250000000000004);
#34=SPHERICAL_SURFACE('',#14855,0.250000000000004);
#35=SPHERICAL_SURFACE('',#15011,0.250000000000004);
#36=SPHERICAL_SURFACE('',#15019,0.250000000000004);
#37=SPHERICAL_SURFACE('',#15023,0.250000000000004);
#38=SPHERICAL_SURFACE('',#15025,0.250000000000004);
#39=(
BOUNDED_SURFACE()
B_SPLINE_SURFACE(2,2,((#29106,#29107,#29108),(#29109,#29110,#29111),(#29112,
#29113,#29114)),.UNSPECIFIED.,.F.,.F.,.F.)
B_SPLINE_SURFACE_WITH_KNOTS((3,3),(3,3),(0.026179938779909,1.57079632679489),
(1.57079632678195,3.14159265358979),.UNSPECIFIED.)
GEOMETRIC_REPRESENTATION_ITEM()
RATIONAL_B_SPLINE_SURFACE(((1.,0.707106781181972,1.),(0.716301943424652,
0.506501961569396,0.716301943424652),(1.,0.707106781181972,1.)))
REPRESENTATION_ITEM('')
SURFACE()
);
#40=(
BOUNDED_SURFACE()
B_SPLINE_SURFACE(2,2,((#29118,#29119,#29120),(#29121,#29122,#29123),(#29124,
#29125,#29126)),.UNSPECIFIED.,.F.,.F.,.F.)
B_SPLINE_SURFACE_WITH_KNOTS((3,3),(3,3),(0.0261799387799115,1.5707963267949),
(-3.1415926535899,-1.57079632679479),.UNSPECIFIED.)
GEOMETRIC_REPRESENTATION_ITEM()
RATIONAL_B_SPLINE_SURFACE(((1.,0.707106781186474,1.),(0.716301943424654,
0.506501961572623,0.716301943424654),(1.,0.707106781186474,1.)))
REPRESENTATION_ITEM('')
SURFACE()
);
#41=(
BOUNDED_SURFACE()
B_SPLINE_SURFACE(2,2,((#29592,#29593,#29594),(#29595,#29596,#29597),(#29598,
#29599,#29600)),.UNSPECIFIED.,.F.,.F.,.F.)
B_SPLINE_SURFACE_WITH_KNOTS((3,3),(3,3),(0.0261799387799126,1.57079632679483),
(1.5707963267931,3.14159265359161),.UNSPECIFIED.)
GEOMETRIC_REPRESENTATION_ITEM()
RATIONAL_B_SPLINE_SURFACE(((1.,0.707106781185269,1.),(0.716301943424674,
0.506501961571774,0.716301943424674),(1.,0.707106781185269,1.)))
REPRESENTATION_ITEM('')
SURFACE()
);
#42=(
BOUNDED_SURFACE()
B_SPLINE_SURFACE(2,2,((#29615,#29616,#29617),(#29618,#29619,#29620),(#29621,
#29622,#29623)),.UNSPECIFIED.,.F.,.F.,.F.)
B_SPLINE_SURFACE_WITH_KNOTS((3,3),(3,3),(0.0261799387799134,1.57079632679539),
(-8.0760564544297E-10,1.57079632762272),.UNSPECIFIED.)
GEOMETRIC_REPRESENTATION_ITEM()
RATIONAL_B_SPLINE_SURFACE(((1.,0.707106780608337,1.),(0.716301943424484,
0.506501961158382,0.716301943424484),(1.,0.707106780608337,1.)))
REPRESENTATION_ITEM('')
SURFACE()
);
#43=(
BOUNDED_SURFACE()
B_SPLINE_SURFACE(2,2,((#54679,#54680,#54681),(#54682,#54683,#54684),(#54685,
#54686,#54687)),.UNSPECIFIED.,.F.,.F.,.F.)
B_SPLINE_SURFACE_WITH_KNOTS((3,3),(3,3),(0.0349065850398763,1.57079632679489),
(-1.57079632679496,5.98645740446536E-12),.UNSPECIFIED.)
GEOMETRIC_REPRESENTATION_ITEM()
RATIONAL_B_SPLINE_SURFACE(((1.,0.707106781184407,1.),(0.719339800338647,
0.508650050795295,0.719339800338647),(1.,0.707106781184407,1.)))
REPRESENTATION_ITEM('')
SURFACE()
);
#44=(
BOUNDED_SURFACE()
B_SPLINE_SURFACE(2,2,((#54704,#54705,#54706,#54707,#54708),(#54709,#54710,
#54711,#54712,#54713),(#54714,#54715,#54716,#54717,#54718)),
 .UNSPECIFIED.,.F.,.F.,.F.)
B_SPLINE_SURFACE_WITH_KNOTS((3,3),(3,2,3),(0.0349065850330011,1.57079632679496),
(-8.23860947518688E-6,0.785394044092976,1.57079632679517),.UNSPECIFIED.)
GEOMETRIC_REPRESENTATION_ITEM()
RATIONAL_B_SPLINE_SURFACE(((1.,0.923878744314463,1.,0.923878744314463,1.),
(0.719339800336237,0.664582751470059,0.719339800336237,0.664582751470059,
0.719339800336237),(1.,0.923878744314463,1.,0.923878744314463,1.)))
REPRESENTATION_ITEM('')
SURFACE()
);
#45=(
BOUNDED_SURFACE()
B_SPLINE_SURFACE(2,2,((#54724,#54725,#54726),(#54727,#54728,#54729),(#54730,
#54731,#54732)),.UNSPECIFIED.,.F.,.F.,.F.)
B_SPLINE_SURFACE_WITH_KNOTS((3,3),(3,3),(0.0349065850398806,1.5707963267949),
(-3.14159265358979,-1.57079632679453),.UNSPECIFIED.)
GEOMETRIC_REPRESENTATION_ITEM()
RATIONAL_B_SPLINE_SURFACE(((1.,0.707106781186418,1.),(0.719339800338654,
0.508650050796746,0.719339800338654),(1.,0.707106781186418,1.)))
REPRESENTATION_ITEM('')
SURFACE()
);
#46=(
BOUNDED_SURFACE()
B_SPLINE_SURFACE(2,2,((#54736,#54737,#54738),(#54739,#54740,#54741),(#54742,
#54743,#54744)),.UNSPECIFIED.,.F.,.F.,.F.)
B_SPLINE_SURFACE_WITH_KNOTS((3,3),(3,3),(0.034906542799713,1.57079632679499),
(-4.71238898039772,-3.1415926332568),.UNSPECIFIED.)
GEOMETRIC_REPRESENTATION_ITEM()
RATIONAL_B_SPLINE_SURFACE(((1.,0.707106773993142,1.),(0.719339785667375,
0.508650035248176,0.719339785667375),(1.,0.707106773993142,1.)))
REPRESENTATION_ITEM('')
SURFACE()
);
#47=CONICAL_SURFACE('',#14137,10.,0.0261799387799149);
#48=CONICAL_SURFACE('',#14155,16.2863924562842,0.0349065850398862);
#49=CONICAL_SURFACE('',#14176,16.2863924562842,0.0349065850398862);
#50=CONICAL_SURFACE('',#14185,9.06783823334262,0.0349030808551501);
#51=CONICAL_SURFACE('',#14189,9.06783823334262,0.0349030808551501);
#52=CONICAL_SURFACE('',#14195,13.8053081237613,0.034907098984152);
#53=CONICAL_SURFACE('',#14201,13.8053081237613,0.0349070989841537);
#54=CONICAL_SURFACE('',#14202,10.,0.0261799387799149);
#55=CONICAL_SURFACE('',#14212,14.2,0.0261799387799149);
#56=CONICAL_SURFACE('',#14242,9.06783823334262,0.0349030808551501);
#57=CONICAL_SURFACE('',#14253,13.8053081237614,0.0349070989841503);
#58=CONICAL_SURFACE('',#14257,13.8053081237614,0.0349070989841537);
#59=CONICAL_SURFACE('',#14260,9.06783823334262,0.0349030808551467);
#60=CONICAL_SURFACE('',#14267,16.2863924562842,0.0349065850398863);
#61=CONICAL_SURFACE('',#14296,16.2863924562842,0.0349065850398885);
#62=CONICAL_SURFACE('',#14306,10.,0.0261799387799149);
#63=CONICAL_SURFACE('',#14308,10.,0.0261799387799149);
#64=CONICAL_SURFACE('',#15143,4.93165120591659,0.0349065850398866);
#65=CONICAL_SURFACE('',#15147,4.93165120591659,0.0349065850398866);
#66=CONICAL_SURFACE('',#15154,4.93165120591659,0.0349065850398866);
#67=CONICAL_SURFACE('',#15157,4.93165120591659,0.0349065850398866);
#68=CONICAL_SURFACE('',#15202,12.0149520254966,0.0261799387799149);
#69=CONICAL_SURFACE('',#15205,11.3029999999997,0.0111106538975943);
#70=TOROIDAL_SURFACE('',#14085,12.,2.);
#71=TOROIDAL_SURFACE('',#14105,12.,2.);
#72=TOROIDAL_SURFACE('',#14146,8.51856578957231,0.457199834800518);
#73=TOROIDAL_SURFACE('',#14151,12.179843568538,0.9906);
#74=TOROIDAL_SURFACE('',#14153,15.1602405269766,0.990599999999977);
#75=TOROIDAL_SURFACE('',#14157,14.3545916052559,0.457200226912318);
#76=TOROIDAL_SURFACE('',#14162,13.2560248690406,0.45720000000003);
#77=TOROIDAL_SURFACE('',#14170,8.51856578957232,0.457199834800518);
#78=TOROIDAL_SURFACE('',#14173,12.179843568538,0.9906);
#79=TOROIDAL_SURFACE('',#14174,15.1602405269766,0.990599999999977);
#80=TOROIDAL_SURFACE('',#14178,14.3545916052559,0.457200226912318);
#81=TOROIDAL_SURFACE('',#14181,13.2560248690406,0.45720000000003);
#82=TOROIDAL_SURFACE('',#14191,9.61711084224311,0.457200000031422);
#83=TOROIDAL_SURFACE('',#14199,9.61711084224312,0.457200000031422);
#84=TOROIDAL_SURFACE('',#14238,9.61711084224312,0.457200000031422);
#85=TOROIDAL_SURFACE('',#14247,9.61711084224312,0.457200000031422);
#86=TOROIDAL_SURFACE('',#14262,13.2560248690407,0.45720000000003);
#87=TOROIDAL_SURFACE('',#14264,14.3545916052559,0.457200226912318);
#88=TOROIDAL_SURFACE('',#14270,15.1602405269766,0.990599999999977);
#89=TOROIDAL_SURFACE('',#14274,12.179843568538,0.9906);
#90=TOROIDAL_SURFACE('',#14279,8.51856578957234,0.457199834800518);
#91=TOROIDAL_SURFACE('',#14293,13.2560248690406,0.45720000000003);
#92=TOROIDAL_SURFACE('',#14294,14.3545916052559,0.457200226912318);
#93=TOROIDAL_SURFACE('',#14299,15.1602405269766,0.990599999999977);
#94=TOROIDAL_SURFACE('',#14301,12.179843568538,0.9906);
#95=TOROIDAL_SURFACE('',#14304,8.51856578957232,0.457199834800518);
#96=TOROIDAL_SURFACE('',#14486,2.0788,0.25);
#97=TOROIDAL_SURFACE('',#14490,2.0788,0.25);
#98=TOROIDAL_SURFACE('',#14648,2.0788,0.25);
#99=TOROIDAL_SURFACE('',#14652,2.0788,0.25);
#100=TOROIDAL_SURFACE('',#14871,2.0788,0.25);
#101=TOROIDAL_SURFACE('',#14875,2.0788,0.25);
#102=TOROIDAL_SURFACE('',#15032,2.0788,0.25);
#103=TOROIDAL_SURFACE('',#15036,2.0788,0.25);
#104=CYLINDRICAL_SURFACE('',#14033,0.457199834800518);
#105=CYLINDRICAL_SURFACE('',#14037,0.457200000031422);
#106=CYLINDRICAL_SURFACE('',#14040,0.45720000000003);
#107=CYLINDRICAL_SURFACE('',#14048,0.457200226912318);
#108=CYLINDRICAL_SURFACE('',#14051,0.9906);
#109=CYLINDRICAL_SURFACE('',#14058,0.9906);
#110=CYLINDRICAL_SURFACE('',#14063,0.990599999999977);
#111=CYLINDRICAL_SURFACE('',#14068,0.990599999999977);
#112=CYLINDRICAL_SURFACE('',#14072,0.45720000000003);
#113=CYLINDRICAL_SURFACE('',#14089,2.);
#114=CYLINDRICAL_SURFACE('',#14091,2.);
#115=CYLINDRICAL_SURFACE('',#14094,0.990599999999977);
#116=CYLINDRICAL_SURFACE('',#14099,0.9906);
#117=CYLINDRICAL_SURFACE('',#14103,2.);
#118=CYLINDRICAL_SURFACE('',#14109,2.);
#119=CYLINDRICAL_SURFACE('',#14112,3.);
#120=CYLINDRICAL_SURFACE('',#14114,10.);
#121=CYLINDRICAL_SURFACE('',#14117,0.9906);
#122=CYLINDRICAL_SURFACE('',#14120,3.);
#123=CYLINDRICAL_SURFACE('',#14123,3.);
#124=CYLINDRICAL_SURFACE('',#14128,10.);
#125=CYLINDRICAL_SURFACE('',#14140,0.990599999999977);
#126=CYLINDRICAL_SURFACE('',#14142,0.9906);
#127=CYLINDRICAL_SURFACE('',#14144,0.990599999999977);
#128=CYLINDRICAL_SURFACE('',#14166,0.457199834800518);
#129=CYLINDRICAL_SURFACE('',#14168,0.457200226912318);
#130=CYLINDRICAL_SURFACE('',#14188,0.45720000000003);
#131=CYLINDRICAL_SURFACE('',#14196,0.457200000031422);
#132=CYLINDRICAL_SURFACE('',#14217,6.35);
#133=CYLINDRICAL_SURFACE('',#14219,10.);
#134=CYLINDRICAL_SURFACE('',#14220,10.);
#135=CYLINDRICAL_SURFACE('',#14221,10.);
#136=CYLINDRICAL_SURFACE('',#14223,0.457199834800518);
#137=CYLINDRICAL_SURFACE('',#14226,0.457200000031422);
#138=CYLINDRICAL_SURFACE('',#14228,0.457200226912318);
#139=CYLINDRICAL_SURFACE('',#14234,10.);
#140=CYLINDRICAL_SURFACE('',#14244,0.457200000031422);
#141=CYLINDRICAL_SURFACE('',#14282,0.45720000000003);
#142=CYLINDRICAL_SURFACE('',#14284,0.457200226912318);
#143=CYLINDRICAL_SURFACE('',#14287,0.990599999999977);
#144=CYLINDRICAL_SURFACE('',#14289,0.9906);
#145=CYLINDRICAL_SURFACE('',#14291,0.457199834800518);
#146=CYLINDRICAL_SURFACE('',#14320,10.);
#147=CYLINDRICAL_SURFACE('',#14324,2.);
#148=CYLINDRICAL_SURFACE('',#14326,2.);
#149=CYLINDRICAL_SURFACE('',#14329,1.);
#150=CYLINDRICAL_SURFACE('',#14334,2.);
#151=CYLINDRICAL_SURFACE('',#14339,2.);
#152=CYLINDRICAL_SURFACE('',#14341,1.5);
#153=CYLINDRICAL_SURFACE('',#14342,2.);
#154=CYLINDRICAL_SURFACE('',#14344,1.5);
#155=CYLINDRICAL_SURFACE('',#14346,1.5);
#156=CYLINDRICAL_SURFACE('',#14348,1.5);
#157=CYLINDRICAL_SURFACE('',#14350,1.5);
#158=CYLINDRICAL_SURFACE('',#14354,2.);
#159=CYLINDRICAL_SURFACE('',#14359,1.5);
#160=CYLINDRICAL_SURFACE('',#14371,0.9906);
#161=CYLINDRICAL_SURFACE('',#14374,0.990599999999977);
#162=CYLINDRICAL_SURFACE('',#14377,2.);
#163=CYLINDRICAL_SURFACE('',#14378,2.);
#164=CYLINDRICAL_SURFACE('',#14380,2.);
#165=CYLINDRICAL_SURFACE('',#14381,2.);
#166=CYLINDRICAL_SURFACE('',#14384,10.);
#167=CYLINDRICAL_SURFACE('',#14386,0.9906);
#168=CYLINDRICAL_SURFACE('',#14390,0.990599999999977);
#169=CYLINDRICAL_SURFACE('',#14393,2.);
#170=CYLINDRICAL_SURFACE('',#14394,2.);
#171=CYLINDRICAL_SURFACE('',#14396,2.);
#172=CYLINDRICAL_SURFACE('',#14398,2.);
#173=CYLINDRICAL_SURFACE('',#14402,1.8288);
#174=CYLINDRICAL_SURFACE('',#14404,1.8288);
#175=CYLINDRICAL_SURFACE('',#14416,1.8288);
#176=CYLINDRICAL_SURFACE('',#14419,1.8288);
#177=CYLINDRICAL_SURFACE('',#14438,0.25);
#178=CYLINDRICAL_SURFACE('',#14440,0.25);
#179=CYLINDRICAL_SURFACE('',#14442,0.25);
#180=CYLINDRICAL_SURFACE('',#14444,1.);
#181=CYLINDRICAL_SURFACE('',#14445,0.25);
#182=CYLINDRICAL_SURFACE('',#14447,0.25);
#183=CYLINDRICAL_SURFACE('',#14449,1.);
#184=CYLINDRICAL_SURFACE('',#14450,0.25);
#185=CYLINDRICAL_SURFACE('',#14453,0.25);
#186=CYLINDRICAL_SURFACE('',#14455,1.);
#187=CYLINDRICAL_SURFACE('',#14456,0.25);
#188=CYLINDRICAL_SURFACE('',#14458,1.);
#189=CYLINDRICAL_SURFACE('',#14459,0.25);
#190=CYLINDRICAL_SURFACE('',#14461,0.25);
#191=CYLINDRICAL_SURFACE('',#14463,0.25);
#192=CYLINDRICAL_SURFACE('',#14466,0.5);
#193=CYLINDRICAL_SURFACE('',#14469,0.5);
#194=CYLINDRICAL_SURFACE('',#14474,0.5);
#195=CYLINDRICAL_SURFACE('',#14483,0.25);
#196=CYLINDRICAL_SURFACE('',#14487,0.25);
#197=CYLINDRICAL_SURFACE('',#14491,0.5);
#198=CYLINDRICAL_SURFACE('',#14495,1.);
#199=CYLINDRICAL_SURFACE('',#14498,0.5);
#200=CYLINDRICAL_SURFACE('',#14501,0.25);
#201=CYLINDRICAL_SURFACE('',#14504,0.5);
#202=CYLINDRICAL_SURFACE('',#14507,0.5);
#203=CYLINDRICAL_SURFACE('',#14513,0.5);
#204=CYLINDRICAL_SURFACE('',#14516,0.25);
#205=CYLINDRICAL_SURFACE('',#14520,0.5);
#206=CYLINDRICAL_SURFACE('',#14523,0.5);
#207=CYLINDRICAL_SURFACE('',#14527,1.);
#208=CYLINDRICAL_SURFACE('',#14532,0.5);
#209=CYLINDRICAL_SURFACE('',#14533,1.);
#210=CYLINDRICAL_SURFACE('',#14534,1.);
#211=CYLINDRICAL_SURFACE('',#14536,1.);
#212=CYLINDRICAL_SURFACE('',#14537,0.5);
#213=CYLINDRICAL_SURFACE('',#14540,1.);
#214=CYLINDRICAL_SURFACE('',#14541,1.);
#215=CYLINDRICAL_SURFACE('',#14545,1.);
#216=CYLINDRICAL_SURFACE('',#14547,0.5);
#217=CYLINDRICAL_SURFACE('',#14550,0.5);
#218=CYLINDRICAL_SURFACE('',#14554,0.5);
#219=CYLINDRICAL_SURFACE('',#14555,0.990599999999977);
#220=CYLINDRICAL_SURFACE('',#14561,0.9906);
#221=CYLINDRICAL_SURFACE('',#14563,0.990599999999977);
#222=CYLINDRICAL_SURFACE('',#14564,0.9906);
#223=CYLINDRICAL_SURFACE('',#14568,1.8288);
#224=CYLINDRICAL_SURFACE('',#14570,1.8288);
#225=CYLINDRICAL_SURFACE('',#14582,1.8288);
#226=CYLINDRICAL_SURFACE('',#14585,1.8288);
#227=CYLINDRICAL_SURFACE('',#14599,0.25);
#228=CYLINDRICAL_SURFACE('',#14601,0.25);
#229=CYLINDRICAL_SURFACE('',#14603,0.25);
#230=CYLINDRICAL_SURFACE('',#14605,1.);
#231=CYLINDRICAL_SURFACE('',#14607,0.25);
#232=CYLINDRICAL_SURFACE('',#14609,0.25);
#233=CYLINDRICAL_SURFACE('',#14611,0.25);
#234=CYLINDRICAL_SURFACE('',#14614,0.25);
#235=CYLINDRICAL_SURFACE('',#14616,1.);
#236=CYLINDRICAL_SURFACE('',#14617,0.25);
#237=CYLINDRICAL_SURFACE('',#14619,1.);
#238=CYLINDRICAL_SURFACE('',#14621,0.25);
#239=CYLINDRICAL_SURFACE('',#14623,0.25);
#240=CYLINDRICAL_SURFACE('',#14625,0.25);
#241=CYLINDRICAL_SURFACE('',#14628,0.5);
#242=CYLINDRICAL_SURFACE('',#14631,0.5);
#243=CYLINDRICAL_SURFACE('',#14636,0.5);
#244=CYLINDRICAL_SURFACE('',#14645,0.25);
#245=CYLINDRICAL_SURFACE('',#14649,0.25);
#246=CYLINDRICAL_SURFACE('',#14653,0.5);
#247=CYLINDRICAL_SURFACE('',#14657,1.);
#248=CYLINDRICAL_SURFACE('',#14660,0.5);
#249=CYLINDRICAL_SURFACE('',#14663,0.25);
#250=CYLINDRICAL_SURFACE('',#14666,0.5);
#251=CYLINDRICAL_SURFACE('',#14669,0.5);
#252=CYLINDRICAL_SURFACE('',#14675,0.5);
#253=CYLINDRICAL_SURFACE('',#14678,0.25);
#254=CYLINDRICAL_SURFACE('',#14682,0.5);
#255=CYLINDRICAL_SURFACE('',#14685,0.5);
#256=CYLINDRICAL_SURFACE('',#14689,1.);
#257=CYLINDRICAL_SURFACE('',#14694,0.5);
#258=CYLINDRICAL_SURFACE('',#14695,1.);
#259=CYLINDRICAL_SURFACE('',#14696,1.);
#260=CYLINDRICAL_SURFACE('',#14698,1.);
#261=CYLINDRICAL_SURFACE('',#14699,0.5);
#262=CYLINDRICAL_SURFACE('',#14702,1.);
#263=CYLINDRICAL_SURFACE('',#14703,1.);
#264=CYLINDRICAL_SURFACE('',#14707,1.);
#265=CYLINDRICAL_SURFACE('',#14709,0.5);
#266=CYLINDRICAL_SURFACE('',#14712,0.5);
#267=CYLINDRICAL_SURFACE('',#14716,0.5);
#268=CYLINDRICAL_SURFACE('',#14717,0.990599999999977);
#269=CYLINDRICAL_SURFACE('',#14720,1.);
#270=CYLINDRICAL_SURFACE('',#14730,0.9906);
#271=CYLINDRICAL_SURFACE('',#14733,0.990599999999977);
#272=CYLINDRICAL_SURFACE('',#14739,2.);
#273=CYLINDRICAL_SURFACE('',#14749,2.);
#274=CYLINDRICAL_SURFACE('',#14750,2.);
#275=CYLINDRICAL_SURFACE('',#14752,2.);
#276=CYLINDRICAL_SURFACE('',#14753,2.);
#277=CYLINDRICAL_SURFACE('',#14756,10.);
#278=CYLINDRICAL_SURFACE('',#14758,0.9906);
#279=CYLINDRICAL_SURFACE('',#14762,0.990599999999977);
#280=CYLINDRICAL_SURFACE('',#14766,2.);
#281=CYLINDRICAL_SURFACE('',#14767,2.);
#282=CYLINDRICAL_SURFACE('',#14770,2.);
#283=CYLINDRICAL_SURFACE('',#14773,2.);
#284=CYLINDRICAL_SURFACE('',#14778,1.8288);
#285=CYLINDRICAL_SURFACE('',#14780,1.8288);
#286=CYLINDRICAL_SURFACE('',#14792,1.8288);
#287=CYLINDRICAL_SURFACE('',#14795,1.8288);
#288=CYLINDRICAL_SURFACE('',#14814,0.25);
#289=CYLINDRICAL_SURFACE('',#14816,0.25);
#290=CYLINDRICAL_SURFACE('',#14818,0.25);
#291=CYLINDRICAL_SURFACE('',#14820,1.);
#292=CYLINDRICAL_SURFACE('',#14821,0.25);
#293=CYLINDRICAL_SURFACE('',#14823,0.25);
#294=CYLINDRICAL_SURFACE('',#14825,1.);
#295=CYLINDRICAL_SURFACE('',#14826,0.25);
#296=CYLINDRICAL_SURFACE('',#14829,0.25);
#297=CYLINDRICAL_SURFACE('',#14831,1.);
#298=CYLINDRICAL_SURFACE('',#14832,0.25);
#299=CYLINDRICAL_SURFACE('',#14834,1.);
#300=CYLINDRICAL_SURFACE('',#14835,0.25);
#301=CYLINDRICAL_SURFACE('',#14837,0.25);
#302=CYLINDRICAL_SURFACE('',#14839,0.25);
#303=CYLINDRICAL_SURFACE('',#14842,0.5);
#304=CYLINDRICAL_SURFACE('',#14845,0.5);
#305=CYLINDRICAL_SURFACE('',#14850,0.5);
#306=CYLINDRICAL_SURFACE('',#14868,0.25);
#307=CYLINDRICAL_SURFACE('',#14872,0.25);
#308=CYLINDRICAL_SURFACE('',#14876,0.5);
#309=CYLINDRICAL_SURFACE('',#14880,1.);
#310=CYLINDRICAL_SURFACE('',#14882,0.5);
#311=CYLINDRICAL_SURFACE('',#14885,0.25);
#312=CYLINDRICAL_SURFACE('',#14888,0.5);
#313=CYLINDRICAL_SURFACE('',#14891,0.5);
#314=CYLINDRICAL_SURFACE('',#14896,0.5);
#315=CYLINDRICAL_SURFACE('',#14899,0.25);
#316=CYLINDRICAL_SURFACE('',#14902,0.5);
#317=CYLINDRICAL_SURFACE('',#14905,0.5);
#318=CYLINDRICAL_SURFACE('',#14909,1.);
#319=CYLINDRICAL_SURFACE('',#14913,0.5);
#320=CYLINDRICAL_SURFACE('',#14914,1.);
#321=CYLINDRICAL_SURFACE('',#14915,1.);
#322=CYLINDRICAL_SURFACE('',#14917,1.);
#323=CYLINDRICAL_SURFACE('',#14918,0.5);
#324=CYLINDRICAL_SURFACE('',#14921,1.);
#325=CYLINDRICAL_SURFACE('',#14922,1.);
#326=CYLINDRICAL_SURFACE('',#14929,1.);
#327=CYLINDRICAL_SURFACE('',#14931,0.5);
#328=CYLINDRICAL_SURFACE('',#14934,0.5);
#329=CYLINDRICAL_SURFACE('',#14938,0.5);
#330=CYLINDRICAL_SURFACE('',#14939,0.990599999999977);
#331=CYLINDRICAL_SURFACE('',#14945,0.9906);
#332=CYLINDRICAL_SURFACE('',#14947,0.990599999999977);
#333=CYLINDRICAL_SURFACE('',#14948,0.9906);
#334=CYLINDRICAL_SURFACE('',#14952,1.8288);
#335=CYLINDRICAL_SURFACE('',#14954,1.8288);
#336=CYLINDRICAL_SURFACE('',#14966,1.8288);
#337=CYLINDRICAL_SURFACE('',#14969,1.8288);
#338=CYLINDRICAL_SURFACE('',#14983,0.25);
#339=CYLINDRICAL_SURFACE('',#14985,0.25);
#340=CYLINDRICAL_SURFACE('',#14987,0.25);
#341=CYLINDRICAL_SURFACE('',#14989,1.);
#342=CYLINDRICAL_SURFACE('',#14991,0.25);
#343=CYLINDRICAL_SURFACE('',#14993,0.25);
#344=CYLINDRICAL_SURFACE('',#14995,0.25);
#345=CYLINDRICAL_SURFACE('',#14998,0.25);
#346=CYLINDRICAL_SURFACE('',#15000,1.);
#347=CYLINDRICAL_SURFACE('',#15001,0.25);
#348=CYLINDRICAL_SURFACE('',#15003,1.);
#349=CYLINDRICAL_SURFACE('',#15005,0.25);
#350=CYLINDRICAL_SURFACE('',#15007,0.25);
#351=CYLINDRICAL_SURFACE('',#15009,0.25);
#352=CYLINDRICAL_SURFACE('',#15012,0.5);
#353=CYLINDRICAL_SURFACE('',#15015,0.5);
#354=CYLINDRICAL_SURFACE('',#15020,0.5);
#355=CYLINDRICAL_SURFACE('',#15029,0.25);
#356=CYLINDRICAL_SURFACE('',#15033,0.25);
#357=CYLINDRICAL_SURFACE('',#15037,0.5);
#358=CYLINDRICAL_SURFACE('',#15041,1.);
#359=CYLINDRICAL_SURFACE('',#15044,0.5);
#360=CYLINDRICAL_SURFACE('',#15047,0.25);
#361=CYLINDRICAL_SURFACE('',#15050,0.5);
#362=CYLINDRICAL_SURFACE('',#15053,0.5);
#363=CYLINDRICAL_SURFACE('',#15059,0.5);
#364=CYLINDRICAL_SURFACE('',#15062,0.25);
#365=CYLINDRICAL_SURFACE('',#15066,0.5);
#366=CYLINDRICAL_SURFACE('',#15069,0.5);
#367=CYLINDRICAL_SURFACE('',#15073,1.);
#368=CYLINDRICAL_SURFACE('',#15078,0.5);
#369=CYLINDRICAL_SURFACE('',#15079,1.);
#370=CYLINDRICAL_SURFACE('',#15080,1.);
#371=CYLINDRICAL_SURFACE('',#15082,1.);
#372=CYLINDRICAL_SURFACE('',#15083,0.5);
#373=CYLINDRICAL_SURFACE('',#15086,1.);
#374=CYLINDRICAL_SURFACE('',#15087,1.);
#375=CYLINDRICAL_SURFACE('',#15094,1.);
#376=CYLINDRICAL_SURFACE('',#15096,0.5);
#377=CYLINDRICAL_SURFACE('',#15099,0.5);
#378=CYLINDRICAL_SURFACE('',#15103,0.5);
#379=CYLINDRICAL_SURFACE('',#15104,0.990599999999977);
#380=CYLINDRICAL_SURFACE('',#15107,1.);
#381=CYLINDRICAL_SURFACE('',#15111,1.5);
#382=CYLINDRICAL_SURFACE('',#15115,2.);
#383=CYLINDRICAL_SURFACE('',#15118,1.5);
#384=CYLINDRICAL_SURFACE('',#15122,2.);
#385=CYLINDRICAL_SURFACE('',#15125,1.);
#386=CYLINDRICAL_SURFACE('',#15130,2.);
#387=CYLINDRICAL_SURFACE('',#15133,2.);
#388=CYLINDRICAL_SURFACE('',#15135,1.5);
#389=CYLINDRICAL_SURFACE('',#15136,2.);
#390=CYLINDRICAL_SURFACE('',#15138,1.5);
#391=CYLINDRICAL_SURFACE('',#15140,1.5);
#392=CYLINDRICAL_SURFACE('',#15142,1.5);
#393=CYLINDRICAL_SURFACE('',#15151,4.931);
#394=CYLINDRICAL_SURFACE('',#15163,4.931);
#395=CYLINDRICAL_SURFACE('',#15165,4.931);
#396=CYLINDRICAL_SURFACE('',#15170,4.931);
#397=CYLINDRICAL_SURFACE('',#15178,2.);
#398=CYLINDRICAL_SURFACE('',#15183,2.);
#399=CYLINDRICAL_SURFACE('',#15188,1.);
#400=CYLINDRICAL_SURFACE('',#15190,2.);
#401=CYLINDRICAL_SURFACE('',#15194,2.);
#402=CYLINDRICAL_SURFACE('',#15200,1.);
#403=CYLINDRICAL_SURFACE('',#15206,17.526);
#404=CYLINDRICAL_SURFACE('',#15208,18.826);
#405=FACE_BOUND('',#2091,.T.);
#406=FACE_BOUND('',#2124,.T.);
#407=FACE_BOUND('',#2209,.T.);
#408=FACE_BOUND('',#2236,.T.);
#409=FACE_BOUND('',#2237,.T.);
#410=FACE_BOUND('',#2404,.T.);
#411=FACE_BOUND('',#2506,.T.);
#412=FACE_BOUND('',#2622,.T.);
#413=FACE_BOUND('',#2663,.T.);
#414=FACE_BOUND('',#2765,.T.);
#415=FACE_BOUND('',#2819,.T.);
#416=FACE_BOUND('',#2821,.T.);
#417=FACE_BOUND('',#2822,.T.);
#418=FACE_BOUND('',#2960,.T.);
#419=PLANE('',#14030);
#420=PLANE('',#14036);
#421=PLANE('',#14047);
#422=PLANE('',#14054);
#423=PLANE('',#14057);
#424=PLANE('',#14060);
#425=PLANE('',#14062);
#426=PLANE('',#14065);
#427=PLANE('',#14071);
#428=PLANE('',#14079);
#429=PLANE('',#14082);
#430=PLANE('',#14083);
#431=PLANE('',#14093);
#432=PLANE('',#14096);
#433=PLANE('',#14101);
#434=PLANE('',#14116);
#435=PLANE('',#14126);
#436=PLANE('',#14127);
#437=PLANE('',#14132);
#438=PLANE('',#14187);
#439=PLANE('',#14198);
#440=PLANE('',#14209);
#441=PLANE('',#14225);
#442=PLANE('',#14246);
#443=PLANE('',#14250);
#444=PLANE('',#14256);
#445=PLANE('',#14286);
#446=PLANE('',#14307);
#447=PLANE('',#14309);
#448=PLANE('',#14321);
#449=PLANE('',#14322);
#450=PLANE('',#14323);
#451=PLANE('',#14336);
#452=PLANE('',#14337);
#453=PLANE('',#14351);
#454=PLANE('',#14357);
#455=PLANE('',#14361);
#456=PLANE('',#14364);
#457=PLANE('',#14365);
#458=PLANE('',#14366);
#459=PLANE('',#14367);
#460=PLANE('',#14368);
#461=PLANE('',#14369);
#462=PLANE('',#14370);
#463=PLANE('',#14372);
#464=PLANE('',#14375);
#465=PLANE('',#14385);
#466=PLANE('',#14387);
#467=PLANE('',#14391);
#468=PLANE('',#14399);
#469=PLANE('',#14400);
#470=PLANE('',#14401);
#471=PLANE('',#14406);
#472=PLANE('',#14409);
#473=PLANE('',#14410);
#474=PLANE('',#14411);
#475=PLANE('',#14414);
#476=PLANE('',#14415);
#477=PLANE('',#14422);
#478=PLANE('',#14425);
#479=PLANE('',#14426);
#480=PLANE('',#14427);
#481=PLANE('',#14430);
#482=PLANE('',#14431);
#483=PLANE('',#14432);
#484=PLANE('',#14437);
#485=PLANE('',#14480);
#486=PLANE('',#14530);
#487=PLANE('',#14538);
#488=PLANE('',#14543);
#489=PLANE('',#14558);
#490=PLANE('',#14562);
#491=PLANE('',#14565);
#492=PLANE('',#14566);
#493=PLANE('',#14567);
#494=PLANE('',#14572);
#495=PLANE('',#14575);
#496=PLANE('',#14576);
#497=PLANE('',#14577);
#498=PLANE('',#14580);
#499=PLANE('',#14581);
#500=PLANE('',#14588);
#501=PLANE('',#14591);
#502=PLANE('',#14592);
#503=PLANE('',#14593);
#504=PLANE('',#14596);
#505=PLANE('',#14597);
#506=PLANE('',#14598);
#507=PLANE('',#14642);
#508=PLANE('',#14692);
#509=PLANE('',#14700);
#510=PLANE('',#14705);
#511=PLANE('',#14718);
#512=PLANE('',#14719);
#513=PLANE('',#14721);
#514=PLANE('',#14724);
#515=PLANE('',#14725);
#516=PLANE('',#14726);
#517=PLANE('',#14727);
#518=PLANE('',#14728);
#519=PLANE('',#14729);
#520=PLANE('',#14731);
#521=PLANE('',#14734);
#522=PLANE('',#14741);
#523=PLANE('',#14742);
#524=PLANE('',#14747);
#525=PLANE('',#14757);
#526=PLANE('',#14759);
#527=PLANE('',#14763);
#528=PLANE('',#14775);
#529=PLANE('',#14776);
#530=PLANE('',#14777);
#531=PLANE('',#14782);
#532=PLANE('',#14785);
#533=PLANE('',#14786);
#534=PLANE('',#14787);
#535=PLANE('',#14790);
#536=PLANE('',#14791);
#537=PLANE('',#14798);
#538=PLANE('',#14801);
#539=PLANE('',#14802);
#540=PLANE('',#14803);
#541=PLANE('',#14806);
#542=PLANE('',#14807);
#543=PLANE('',#14808);
#544=PLANE('',#14813);
#545=PLANE('',#14856);
#546=PLANE('',#14865);
#547=PLANE('',#14911);
#548=PLANE('',#14919);
#549=PLANE('',#14924);
#550=PLANE('',#14942);
#551=PLANE('',#14946);
#552=PLANE('',#14949);
#553=PLANE('',#14950);
#554=PLANE('',#14951);
#555=PLANE('',#14956);
#556=PLANE('',#14959);
#557=PLANE('',#14960);
#558=PLANE('',#14961);
#559=PLANE('',#14964);
#560=PLANE('',#14965);
#561=PLANE('',#14972);
#562=PLANE('',#14975);
#563=PLANE('',#14976);
#564=PLANE('',#14977);
#565=PLANE('',#14980);
#566=PLANE('',#14981);
#567=PLANE('',#14982);
#568=PLANE('',#15026);
#569=PLANE('',#15076);
#570=PLANE('',#15084);
#571=PLANE('',#15089);
#572=PLANE('',#15105);
#573=PLANE('',#15106);
#574=PLANE('',#15108);
#575=PLANE('',#15112);
#576=PLANE('',#15119);
#577=PLANE('',#15120);
#578=PLANE('',#15121);
#579=PLANE('',#15132);
#580=PLANE('',#15146);
#581=PLANE('',#15150);
#582=PLANE('',#15172);
#583=PLANE('',#15174);
#584=PLANE('',#15175);
#585=PLANE('',#15176);
#586=PLANE('',#15189);
#587=PLANE('',#15197);
#588=PLANE('',#15210);
#589=CIRCLE('',#14028,1.00006324269337);
#590=CIRCLE('',#14031,17.526);
#591=CIRCLE('',#14032,14.2);
#592=CIRCLE('',#14034,0.457199834800518);
#593=CIRCLE('',#14035,0.457199834800518);
#594=CIRCLE('',#14038,0.457200000031422);
#595=CIRCLE('',#14039,0.457200000031422);
#596=CIRCLE('',#14041,0.45720000000003);
#597=CIRCLE('',#14042,0.45720000000003);
#598=CIRCLE('',#14043,0.45720000000003);
#599=CIRCLE('',#14044,0.45720000000003);
#600=CIRCLE('',#14045,0.45720000000003);
#601=CIRCLE('',#14046,0.45720000000003);
#602=CIRCLE('',#14049,0.457200226912318);
#603=CIRCLE('',#14050,0.457200226912318);
#604=CIRCLE('',#14052,0.9906);
#605=CIRCLE('',#14053,0.99060000000001);
#606=CIRCLE('',#14059,0.9906);
#607=CIRCLE('',#14064,0.990599999999977);
#608=CIRCLE('',#14066,12.179843568538);
#609=CIRCLE('',#14067,15.1602405269766);
#610=CIRCLE('',#14069,0.990599999999968);
#611=CIRCLE('',#14070,0.990599999999977);
#612=CIRCLE('',#14073,0.45720000000003);
#613=CIRCLE('',#14074,0.45720000000003);
#614=CIRCLE('',#14075,0.45720000000003);
#615=CIRCLE('',#14076,0.45720000000003);
#616=CIRCLE('',#14077,0.45720000000003);
#617=CIRCLE('',#14078,0.45720000000003);
#618=CIRCLE('',#14086,10.);
#619=CIRCLE('',#14087,2.);
#620=CIRCLE('',#14088,12.);
#621=CIRCLE('',#14095,0.990599999999977);
#622=CIRCLE('',#14097,15.1602405269766);
#623=CIRCLE('',#14098,12.179843568538);
#624=CIRCLE('',#14100,0.9906);
#625=CIRCLE('',#14104,2.);
#626=CIRCLE('',#14106,12.);
#627=CIRCLE('',#14107,10.);
#628=CIRCLE('',#14111,2.64866191682532);
#629=CIRCLE('',#14113,2.99999999999997);
#630=CIRCLE('',#14115,10.);
#631=CIRCLE('',#14118,0.9906);
#632=CIRCLE('',#14119,2.64866191682532);
#633=CIRCLE('',#14121,2.99999999999998);
#634=CIRCLE('',#14122,3.);
#635=CIRCLE('',#14124,2.99999999999997);
#636=CIRCLE('',#14125,3.00000000000002);
#637=CIRCLE('',#14129,10.);
#638=CIRCLE('',#14130,4.97810255809728);
#639=CIRCLE('',#14138,10.2550045405388);
#640=CIRCLE('',#14139,11.1895830224171);
#641=CIRCLE('',#14141,0.990599999999977);
#642=CIRCLE('',#14143,0.9906);
#643=CIRCLE('',#14145,0.990599999999977);
#644=CIRCLE('',#14147,0.457199834800518);
#645=CIRCLE('',#14148,8.9754871664968);
#646=CIRCLE('',#14149,0.457199834800518);
#647=CIRCLE('',#14150,8.51856589268605);
#648=CIRCLE('',#14152,11.1895830224171);
#649=CIRCLE('',#14154,16.1502370802216);
#650=CIRCLE('',#14156,16.4225519545177);
#651=CIRCLE('',#14158,0.457200226912318);
#652=CIRCLE('',#14159,14.3545915894616);
#653=CIRCLE('',#14160,0.457200226912318);
#654=CIRCLE('',#14161,13.8976699005693);
#655=CIRCLE('',#14163,0.45720000000003);
#656=CIRCLE('',#14164,13.7129463469532);
#657=CIRCLE('',#14165,13.2560248310165);
#658=CIRCLE('',#14167,0.457199834800518);
#659=CIRCLE('',#14169,0.457200226912318);
#660=CIRCLE('',#14171,8.97548716649682);
#661=CIRCLE('',#14172,8.51856589268607);
#662=CIRCLE('',#14175,16.1502370802217);
#663=CIRCLE('',#14177,16.4225519545177);
#664=CIRCLE('',#14179,14.3545915894617);
#665=CIRCLE('',#14180,13.8976699005693);
#666=CIRCLE('',#14182,13.7129463469533);
#667=CIRCLE('',#14183,0.45720000000003);
#668=CIRCLE('',#14184,13.2560248310166);
#669=CIRCLE('',#14186,9.16018930018842);
#670=CIRCLE('',#14190,9.16018930018842);
#671=CIRCLE('',#14192,0.457200000031422);
#672=CIRCLE('',#14193,9.61711080421909);
#673=CIRCLE('',#14194,0.457200000031422);
#674=CIRCLE('',#14197,0.457200000031422);
#675=CIRCLE('',#14200,9.61711080421908);
#676=CIRCLE('',#14203,10.2550045405388);
#677=CIRCLE('',#14205,19.7893230113204);
#678=CIRCLE('',#14210,18.826);
#679=CIRCLE('',#14211,18.826);
#680=CIRCLE('',#14213,0.258431290783208);
#681=CIRCLE('',#14214,10.);
#682=CIRCLE('',#14215,10.);
#683=CIRCLE('',#14216,0.258431290783208);
#684=CIRCLE('',#14222,10.);
#685=CIRCLE('',#14224,0.457199834800518);
#686=CIRCLE('',#14227,0.457200000031422);
#687=CIRCLE('',#14229,0.457200226912318);
#688=CIRCLE('',#14230,10.);
#689=CIRCLE('',#14231,10.2550045405388);
#690=CIRCLE('',#14232,10.);
#691=CIRCLE('',#14233,0.258431290783208);
#692=CIRCLE('',#14235,10.);
#693=CIRCLE('',#14236,10.2550045405388);
#694=CIRCLE('',#14237,0.258431290783208);
#695=CIRCLE('',#14239,9.61711080421907);
#696=CIRCLE('',#14240,0.457200000031422);
#697=CIRCLE('',#14241,9.1601893001884);
#698=CIRCLE('',#14243,8.97548716649681);
#699=CIRCLE('',#14245,0.457200000031422);
#700=CIRCLE('',#14248,9.61711080421907);
#701=CIRCLE('',#14249,9.1601893001884);
#702=CIRCLE('',#14251,13.2560248310165);
#703=CIRCLE('',#14252,13.2560248310165);
#704=CIRCLE('',#14254,13.7129463469533);
#705=CIRCLE('',#14255,13.8976699005693);
#706=CIRCLE('',#14258,13.7129463469532);
#707=CIRCLE('',#14259,13.8976699005693);
#708=CIRCLE('',#14261,8.97548716649681);
#709=CIRCLE('',#14263,0.45720000000003);
#710=CIRCLE('',#14265,14.3545915894616);
#711=CIRCLE('',#14266,0.457200226912318);
#712=CIRCLE('',#14268,16.1502370802216);
#713=CIRCLE('',#14269,16.4225519545177);
#714=CIRCLE('',#14271,0.990599999999977);
#715=CIRCLE('',#14272,15.1602405269766);
#716=CIRCLE('',#14273,0.990599999999977);
#717=CIRCLE('',#14275,0.9906);
#718=CIRCLE('',#14276,11.1895830224171);
#719=CIRCLE('',#14277,0.9906);
#720=CIRCLE('',#14278,12.179843568538);
#721=CIRCLE('',#14280,0.457199834800518);
#722=CIRCLE('',#14281,8.51856578957234);
#723=CIRCLE('',#14283,0.45720000000003);
#724=CIRCLE('',#14285,0.457200226912318);
#725=CIRCLE('',#14288,0.990599999999977);
#726=CIRCLE('',#14290,0.9906);
#727=CIRCLE('',#14292,0.457199834800518);
#728=CIRCLE('',#14295,14.3545915894617);
#729=CIRCLE('',#14297,16.1502370802217);
#730=CIRCLE('',#14298,16.4225519545177);
#731=CIRCLE('',#14300,15.1602405269766);
#732=CIRCLE('',#14302,11.1895830224171);
#733=CIRCLE('',#14303,12.179843568538);
#734=CIRCLE('',#14305,8.51856578957232);
#735=CIRCLE('',#14310,2.64866191682532);
#736=CIRCLE('',#14311,2.64866191682532);
#737=CIRCLE('',#14325,2.00000000000016);
#738=CIRCLE('',#14327,1.99999999999997);
#739=CIRCLE('',#14328,2.00000000000004);
#740=CIRCLE('',#14330,1.);
#741=CIRCLE('',#14331,0.999999999999983);
#742=CIRCLE('',#14332,0.999999999999983);
#743=CIRCLE('',#14333,1.);
#744=CIRCLE('',#14335,2.);
#745=CIRCLE('',#14340,2.00000000000019);
#746=CIRCLE('',#14343,2.00000000000021);
#747=CIRCLE('',#14347,1.49999999999999);
#748=CIRCLE('',#14349,1.5);
#749=CIRCLE('',#14352,6.24170092757446);
#750=CIRCLE('',#14353,6.24170092757446);
#751=CIRCLE('',#14355,1.99999999999992);
#752=CIRCLE('',#14356,1.99999999999992);
#753=CIRCLE('',#14362,6.24170092757446);
#754=CIRCLE('',#14363,6.24170092757446);
#755=CIRCLE('',#14417,1.8288);
#756=CIRCLE('',#14420,1.8288);
#757=CIRCLE('',#14439,0.25);
#758=CIRCLE('',#14441,0.250000000000004);
#759=CIRCLE('',#14443,0.249999999999997);
#760=CIRCLE('',#14446,0.249999999999979);
#761=CIRCLE('',#14448,0.250000000000004);
#762=CIRCLE('',#14451,0.249999999999997);
#763=CIRCLE('',#14452,0.250000000000004);
#764=CIRCLE('',#14454,0.249999999999995);
#765=CIRCLE('',#14457,0.250000000000004);
#766=CIRCLE('',#14460,0.249999999999997);
#767=CIRCLE('',#14462,0.250000000000004);
#768=CIRCLE('',#14464,0.250000000000004);
#769=CIRCLE('',#14467,0.499999999999989);
#770=CIRCLE('',#14468,1.4803295942208);
#771=CIRCLE('',#14470,0.499999999999973);
#772=CIRCLE('',#14471,0.500000000000014);
#773=CIRCLE('',#14475,0.499999999999999);
#774=CIRCLE('',#14478,1.38693464988864);
#775=CIRCLE('',#14481,2.0788);
#776=CIRCLE('',#14482,2.0788);
#777=CIRCLE('',#14484,0.250000000000004);
#778=CIRCLE('',#14485,0.250000000000004);
#779=CIRCLE('',#14488,0.250000000000004);
#780=CIRCLE('',#14489,0.250000000000004);
#781=CIRCLE('',#14492,0.500000000000007);
#782=CIRCLE('',#14493,0.500000000000014);
#783=CIRCLE('',#14494,0.500000000000007);
#784=CIRCLE('',#14496,0.500000000000002);
#785=CIRCLE('',#14499,0.5);
#786=CIRCLE('',#14500,0.5);
#787=CIRCLE('',#14502,0.250000000000004);
#788=CIRCLE('',#14503,0.250000000000004);
#789=CIRCLE('',#14505,0.5);
#790=CIRCLE('',#14506,0.5);
#791=CIRCLE('',#14508,0.500000000000007);
#792=CIRCLE('',#14509,0.5);
#793=CIRCLE('',#14510,0.5);
#794=CIRCLE('',#14511,0.500000000000007);
#795=CIRCLE('',#14512,0.412928823962133);
#796=CIRCLE('',#14514,0.5);
#797=CIRCLE('',#14515,0.5);
#798=CIRCLE('',#14517,0.250000000000004);
#799=CIRCLE('',#14518,0.250000000000004);
#800=CIRCLE('',#14519,0.412928823962133);
#801=CIRCLE('',#14521,0.5);
#802=CIRCLE('',#14522,0.5);
#803=CIRCLE('',#14524,0.500000000000007);
#804=CIRCLE('',#14525,0.5);
#805=CIRCLE('',#14526,0.5);
#806=CIRCLE('',#14529,0.500000000000008);
#807=CIRCLE('',#14535,1.00000004362738);
#808=CIRCLE('',#14542,1.00000004377106);
#809=CIRCLE('',#14546,0.499999999999994);
#810=CIRCLE('',#14548,0.499999999999996);
#811=CIRCLE('',#14549,0.500000000000012);
#812=CIRCLE('',#14551,0.500000000000007);
#813=CIRCLE('',#14552,0.499999999999994);
#814=CIRCLE('',#14553,0.499999999999999);
#815=CIRCLE('',#14583,1.8288);
#816=CIRCLE('',#14586,1.8288);
#817=CIRCLE('',#14600,0.25);
#818=CIRCLE('',#14602,0.250000000000004);
#819=CIRCLE('',#14604,0.249999999999997);
#820=CIRCLE('',#14608,0.249999999999979);
#821=CIRCLE('',#14610,0.250000000000004);
#822=CIRCLE('',#14612,0.249999999999997);
#823=CIRCLE('',#14613,0.250000000000004);
#824=CIRCLE('',#14615,0.249999999999995);
#825=CIRCLE('',#14618,0.250000000000004);
#826=CIRCLE('',#14622,0.249999999999997);
#827=CIRCLE('',#14624,0.250000000000004);
#828=CIRCLE('',#14626,0.250000000000004);
#829=CIRCLE('',#14629,0.500000000000007);
#830=CIRCLE('',#14630,1.48024480123299);
#831=CIRCLE('',#14632,0.500000000000027);
#832=CIRCLE('',#14633,0.499999999999987);
#833=CIRCLE('',#14637,0.499999999999999);
#834=CIRCLE('',#14640,1.38690572247484);
#835=CIRCLE('',#14643,2.0788);
#836=CIRCLE('',#14644,2.0788);
#837=CIRCLE('',#14646,0.250000000000004);
#838=CIRCLE('',#14647,0.250000000000004);
#839=CIRCLE('',#14650,0.250000000000004);
#840=CIRCLE('',#14651,0.250000000000004);
#841=CIRCLE('',#14654,0.500000000000007);
#842=CIRCLE('',#14655,0.500000000000014);
#843=CIRCLE('',#14656,0.500000000000007);
#844=CIRCLE('',#14658,0.50000000000001);
#845=CIRCLE('',#14661,0.5);
#846=CIRCLE('',#14662,0.5);
#847=CIRCLE('',#14664,0.250000000000004);
#848=CIRCLE('',#14665,0.250000000000004);
#849=CIRCLE('',#14667,0.5);
#850=CIRCLE('',#14668,0.5);
#851=CIRCLE('',#14670,0.500000000000007);
#852=CIRCLE('',#14671,0.5);
#853=CIRCLE('',#14672,0.5);
#854=CIRCLE('',#14673,0.500000000000007);
#855=CIRCLE('',#14674,0.412928823962133);
#856=CIRCLE('',#14676,0.5);
#857=CIRCLE('',#14677,0.5);
#858=CIRCLE('',#14679,0.250000000000004);
#859=CIRCLE('',#14680,0.250000000000004);
#860=CIRCLE('',#14681,0.412928823962133);
#861=CIRCLE('',#14683,0.5);
#862=CIRCLE('',#14684,0.5);
#863=CIRCLE('',#14686,0.500000000000007);
#864=CIRCLE('',#14687,0.5);
#865=CIRCLE('',#14688,0.5);
#866=CIRCLE('',#14691,0.500000000000018);
#867=CIRCLE('',#14708,0.500000000000034);
#868=CIRCLE('',#14710,0.500000000000009);
#869=CIRCLE('',#14711,0.500000000000012);
#870=CIRCLE('',#14713,0.500000000000007);
#871=CIRCLE('',#14714,0.499999999999989);
#872=CIRCLE('',#14715,0.500000000000012);
#873=CIRCLE('',#14722,0.412928823962133);
#874=CIRCLE('',#14723,0.412928823962133);
#875=CIRCLE('',#14737,6.24170092757446);
#876=CIRCLE('',#14738,6.24170092757446);
#877=CIRCLE('',#14740,2.00000000000009);
#878=CIRCLE('',#14745,6.24170092757446);
#879=CIRCLE('',#14746,6.24170092757446);
#880=CIRCLE('',#14793,1.8288);
#881=CIRCLE('',#14796,1.8288);
#882=CIRCLE('',#14815,0.25);
#883=CIRCLE('',#14817,0.250000000000004);
#884=CIRCLE('',#14819,0.249999999999997);
#885=CIRCLE('',#14822,0.249999999999979);
#886=CIRCLE('',#14824,0.250000000000004);
#887=CIRCLE('',#14827,0.249999999999997);
#888=CIRCLE('',#14828,0.250000000000004);
#889=CIRCLE('',#14830,0.249999999999995);
#890=CIRCLE('',#14833,0.250000000000004);
#891=CIRCLE('',#14836,0.249999999999997);
#892=CIRCLE('',#14838,0.250000000000004);
#893=CIRCLE('',#14840,0.250000000000004);
#894=CIRCLE('',#14843,0.499999999999998);
#895=CIRCLE('',#14844,1.48032959424063);
#896=CIRCLE('',#14846,0.5);
#897=CIRCLE('',#14847,0.500000000000018);
#898=CIRCLE('',#14851,0.500000000000013);
#899=CIRCLE('',#14854,1.38693464992151);
#900=CIRCLE('',#14857,0.412928823962133);
#901=CIRCLE('',#14858,0.412928823962133);
#902=CIRCLE('',#14860,0.412928823962133);
#903=CIRCLE('',#14861,0.412928823962133);
#904=CIRCLE('',#14862,0.412928823962133);
#905=CIRCLE('',#14863,0.412928823962133);
#906=CIRCLE('',#14866,2.0788);
#907=CIRCLE('',#14867,2.0788);
#908=CIRCLE('',#14869,0.250000000000004);
#909=CIRCLE('',#14870,0.250000000000004);
#910=CIRCLE('',#14873,0.250000000000004);
#911=CIRCLE('',#14874,0.250000000000004);
#912=CIRCLE('',#14877,0.500000000000007);
#913=CIRCLE('',#14878,0.500000000000007);
#914=CIRCLE('',#14879,0.500000000000007);
#915=CIRCLE('',#14881,0.500000000000024);
#916=CIRCLE('',#14883,0.5);
#917=CIRCLE('',#14884,0.5);
#918=CIRCLE('',#14886,0.250000000000004);
#919=CIRCLE('',#14887,0.250000000000004);
#920=CIRCLE('',#14889,0.5);
#921=CIRCLE('',#14890,0.5);
#922=CIRCLE('',#14892,0.500000000000007);
#923=CIRCLE('',#14893,0.500000000000007);
#924=CIRCLE('',#14894,0.5);
#925=CIRCLE('',#14895,0.5);
#926=CIRCLE('',#14897,0.5);
#927=CIRCLE('',#14898,0.5);
#928=CIRCLE('',#14900,0.250000000000004);
#929=CIRCLE('',#14901,0.250000000000004);
#930=CIRCLE('',#14903,0.5);
#931=CIRCLE('',#14904,0.5);
#932=CIRCLE('',#14906,0.500000000000014);
#933=CIRCLE('',#14907,0.5);
#934=CIRCLE('',#14908,0.5);
#935=CIRCLE('',#14910,0.500000000000001);
#936=CIRCLE('',#14916,1.00000003390938);
#937=CIRCLE('',#14923,1.00000004377106);
#938=CIRCLE('',#14930,0.499999999999995);
#939=CIRCLE('',#14932,0.499999999999998);
#940=CIRCLE('',#14933,0.500000000000007);
#941=CIRCLE('',#14935,0.500000000000012);
#942=CIRCLE('',#14936,0.499999999999979);
#943=CIRCLE('',#14937,0.499999999999998);
#944=CIRCLE('',#14967,1.8288);
#945=CIRCLE('',#14970,1.8288);
#946=CIRCLE('',#14984,0.25);
#947=CIRCLE('',#14986,0.250000000000004);
#948=CIRCLE('',#14988,0.249999999999997);
#949=CIRCLE('',#14992,0.249999999999979);
#950=CIRCLE('',#14994,0.250000000000004);
#951=CIRCLE('',#14996,0.249999999999997);
#952=CIRCLE('',#14997,0.250000000000004);
#953=CIRCLE('',#14999,0.249999999999995);
#954=CIRCLE('',#15002,0.250000000000004);
#955=CIRCLE('',#15006,0.249999999999997);
#956=CIRCLE('',#15008,0.250000000000004);
#957=CIRCLE('',#15010,0.250000000000004);
#958=CIRCLE('',#15013,0.50000000000002);
#959=CIRCLE('',#15014,1.48024480123085);
#960=CIRCLE('',#15016,0.500000000000027);
#961=CIRCLE('',#15017,0.5);
#962=CIRCLE('',#15021,0.500000000000014);
#963=CIRCLE('',#15024,1.38690572245923);
#964=CIRCLE('',#15027,2.0788);
#965=CIRCLE('',#15028,2.0788);
#966=CIRCLE('',#15030,0.250000000000004);
#967=CIRCLE('',#15031,0.250000000000004);
#968=CIRCLE('',#15034,0.250000000000004);
#969=CIRCLE('',#15035,0.250000000000004);
#970=CIRCLE('',#15038,0.500000000000007);
#971=CIRCLE('',#15039,0.500000000000007);
#972=CIRCLE('',#15040,0.500000000000007);
#973=CIRCLE('',#15042,0.499999999999995);
#974=CIRCLE('',#15045,0.5);
#975=CIRCLE('',#15046,0.5);
#976=CIRCLE('',#15048,0.250000000000004);
#977=CIRCLE('',#15049,0.250000000000004);
#978=CIRCLE('',#15051,0.5);
#979=CIRCLE('',#15052,0.5);
#980=CIRCLE('',#15054,0.500000000000007);
#981=CIRCLE('',#15055,0.500000000000007);
#982=CIRCLE('',#15056,0.5);
#983=CIRCLE('',#15057,0.5);
#984=CIRCLE('',#15058,0.412928823962133);
#985=CIRCLE('',#15060,0.5);
#986=CIRCLE('',#15061,0.5);
#987=CIRCLE('',#15063,0.250000000000004);
#988=CIRCLE('',#15064,0.250000000000004);
#989=CIRCLE('',#15065,0.412928823962133);
#990=CIRCLE('',#15067,0.5);
#991=CIRCLE('',#15068,0.5);
#992=CIRCLE('',#15070,0.500000000000006);
#993=CIRCLE('',#15071,0.5);
#994=CIRCLE('',#15072,0.5);
#995=CIRCLE('',#15074,0.500000000000046);
#996=CIRCLE('',#15081,1.00000004377106);
#997=CIRCLE('',#15088,1.00000004377106);
#998=CIRCLE('',#15095,0.500000000000043);
#999=CIRCLE('',#15097,0.499999999999989);
#1000=CIRCLE('',#15098,0.500000000000007);
#1001=CIRCLE('',#15100,0.500000000000012);
#1002=CIRCLE('',#15101,0.499999999999974);
#1003=CIRCLE('',#15102,0.500000000000016);
#1004=CIRCLE('',#15109,0.412928823962133);
#1005=CIRCLE('',#15110,0.412928823962133);
#1006=CIRCLE('',#15116,2.00000000000015);
#1007=CIRCLE('',#15117,1.99999999999994);
#1008=CIRCLE('',#15123,2.00000000000025);
#1009=CIRCLE('',#15124,1.99999999999996);
#1010=CIRCLE('',#15126,1.);
#1011=CIRCLE('',#15127,1.);
#1012=CIRCLE('',#15128,0.999999999999983);
#1013=CIRCLE('',#15129,0.999999999999983);
#1014=CIRCLE('',#15131,1.99999999999999);
#1015=CIRCLE('',#15134,1.99999999999998);
#1016=CIRCLE('',#15137,2.00000000000021);
#1017=CIRCLE('',#15139,1.50000000000001);
#1018=CIRCLE('',#15141,1.49999999999999);
#1019=CIRCLE('',#15144,6.71644093568936);
#1020=CIRCLE('',#15145,5.13386351918872);
#1021=CIRCLE('',#15148,6.71644083258864);
#1022=CIRCLE('',#15149,5.13386335763136);
#1023=CIRCLE('',#15152,4.931);
#1024=CIRCLE('',#15153,4.931);
#1025=CIRCLE('',#15155,6.71644094820958);
#1026=CIRCLE('',#15156,5.13386351918872);
#1027=CIRCLE('',#15158,6.71644084516933);
#1028=CIRCLE('',#15159,5.13386337019706);
#1029=CIRCLE('',#15160,4.931);
#1030=CIRCLE('',#15161,4.931);
#1031=CIRCLE('',#15162,0.205867351157574);
#1032=CIRCLE('',#15164,4.931);
#1033=CIRCLE('',#15166,4.931);
#1034=CIRCLE('',#15167,4.931);
#1035=CIRCLE('',#15168,4.931);
#1036=CIRCLE('',#15169,0.205867351157574);
#1037=CIRCLE('',#15171,0.205867351157574);
#1038=CIRCLE('',#15173,0.205867351157574);
#1039=CIRCLE('',#15184,2.00000000000002);
#1040=CIRCLE('',#15187,1.);
#1041=CIRCLE('',#15191,2.00000000000002);
#1042=CIRCLE('',#15199,1.);
#1043=CIRCLE('',#15203,11.1800844391057);
#1044=CIRCLE('',#15204,11.1800844391057);
#1045=CIRCLE('',#15207,17.526);
#1046=CIRCLE('',#15209,18.826);
#1047=ELLIPSE('',#14027,16.6756775816693,14.3466905647761);
#1048=ELLIPSE('',#14029,16.6499069956059,14.3119313494143);
#1049=ELLIPSE('',#14055,1.40086717012248,1.23990058121417);
#1050=ELLIPSE('',#14056,1.32238468869511,1.15603085421518);
#1051=ELLIPSE('',#14061,1.50114306262704,1.5);
#1052=ELLIPSE('',#14080,1.32232163679205,1.15592400731198);
#1053=ELLIPSE('',#14081,1.39961968177084,1.23833455509056);
#1054=ELLIPSE('',#14084,1.50114306262704,1.5);
#1055=ELLIPSE('',#14090,6.96909460193597,5.11968338389616);
#1056=ELLIPSE('',#14092,2.00487190669876,2.);
#1057=ELLIPSE('',#14102,6.35217673231701,6.35);
#1058=ELLIPSE('',#14108,2.00487190669876,2.);
#1059=ELLIPSE('',#14110,6.99801443232031,5.12894383808924);
#1060=ELLIPSE('',#14131,4.34067247181838,3.75796570434698);
#1061=ELLIPSE('',#14133,94.4305089814173,3.);
#1062=ELLIPSE('',#14134,94.4305089814173,3.);
#1063=ELLIPSE('',#14135,31.4768363271391,1.);
#1064=ELLIPSE('',#14136,31.4768363271391,1.);
#1065=ELLIPSE('',#14204,0.435448781602458,0.375754416056959);
#1066=ELLIPSE('',#14206,16.7803817068461,13.9041963678707);
#1067=ELLIPSE('',#14207,15.5500460493381,13.1844170991174);
#1068=ELLIPSE('',#14208,15.5695324859657,13.16206721049);
#1069=ELLIPSE('',#14218,6.35387060629752,6.35);
#1070=ELLIPSE('',#14312,2.00442168077688,2.);
#1071=ELLIPSE('',#14313,2.00442168077688,2.);
#1072=ELLIPSE('',#14314,2.00442168077688,2.);
#1073=ELLIPSE('',#14315,2.00442168077688,2.);
#1074=ELLIPSE('',#14316,2.00243750680133,2.);
#1075=ELLIPSE('',#14317,2.00243747090625,2.00000000000013);
#1076=ELLIPSE('',#14318,2.00243747090625,2.00000000000013);
#1077=ELLIPSE('',#14319,2.00243747094997,2.00000000000013);
#1078=ELLIPSE('',#14338,3.247800491538,3.);
#1079=ELLIPSE('',#14345,2.63177721967854,1.02810491413963);
#1080=ELLIPSE('',#14358,12.0073145315858,12.);
#1081=ELLIPSE('',#14360,2.63177709700072,1.02810486921893);
#1082=ELLIPSE('',#14373,1.01009191095055,1.0094);
#1083=ELLIPSE('',#14376,1.50114306262704,1.5);
#1084=ELLIPSE('',#14379,2.0003492966399,2.);
#1085=ELLIPSE('',#14382,2.00034929663992,2.);
#1086=ELLIPSE('',#14383,1.01009191095056,1.0094);
#1087=ELLIPSE('',#14388,1.01036107804482,1.0094);
#1088=ELLIPSE('',#14389,1.01036107804485,1.0094);
#1089=ELLIPSE('',#14392,8.43578438042808,3.5);
#1090=ELLIPSE('',#14395,2.00048522814541,2.);
#1091=ELLIPSE('',#14397,2.00048522814538,2.);
#1092=ELLIPSE('',#14403,1.83221745488834,1.8288);
#1093=ELLIPSE('',#14405,1.83221745488835,1.8288);
#1094=ELLIPSE('',#14407,0.50093434352809,0.5);
#1095=ELLIPSE('',#14408,0.50093434352809,0.5);
#1096=ELLIPSE('',#14412,0.50093434352809,0.5);
#1097=ELLIPSE('',#14413,0.50093434352809,0.5);
#1098=ELLIPSE('',#14418,1.83221745488834,1.8288);
#1099=ELLIPSE('',#14421,1.83221745488835,1.8288);
#1100=ELLIPSE('',#14423,0.250467171764045,0.25);
#1101=ELLIPSE('',#14424,0.250467171764045,0.25);
#1102=ELLIPSE('',#14428,0.250467171764045,0.25);
#1103=ELLIPSE('',#14429,0.250467171764045,0.25);
#1104=ELLIPSE('',#14433,1.00121873547499,1.00000000000007);
#1105=ELLIPSE('',#14434,1.00121871750572,1.);
#1106=ELLIPSE('',#14435,1.00121871750572,1.);
#1107=ELLIPSE('',#14436,1.00121873549684,1.00000000000007);
#1108=ELLIPSE('',#14472,1.50182807625858,1.5);
#1109=ELLIPSE('',#14476,1.50182807625857,1.5);
#1110=ELLIPSE('',#14497,0.500296846429959,0.5);
#1111=ELLIPSE('',#14528,0.500296846429953,0.499999999999993);
#1112=ELLIPSE('',#14531,1.99208500153634,1.9906);
#1113=ELLIPSE('',#14539,1.99208500153634,1.9906);
#1114=ELLIPSE('',#14544,1.2875825182328,1.0832368529326);
#1115=ELLIPSE('',#14556,0.991203814604084,0.990599999999977);
#1116=ELLIPSE('',#14557,0.99120381458239,0.990599999999977);
#1117=ELLIPSE('',#14559,1.0012187175057,1.);
#1118=ELLIPSE('',#14560,1.00121871750573,1.);
#1119=ELLIPSE('',#14569,1.83221745488834,1.8288);
#1120=ELLIPSE('',#14571,1.83221745488835,1.8288);
#1121=ELLIPSE('',#14573,0.50093434352809,0.5);
#1122=ELLIPSE('',#14574,0.50093434352809,0.5);
#1123=ELLIPSE('',#14578,0.50093434352809,0.5);
#1124=ELLIPSE('',#14579,0.50093434352809,0.5);
#1125=ELLIPSE('',#14584,1.83221745488834,1.8288);
#1126=ELLIPSE('',#14587,1.83221745488835,1.8288);
#1127=ELLIPSE('',#14589,0.250467171764045,0.25);
#1128=ELLIPSE('',#14590,0.250467171764045,0.25);
#1129=ELLIPSE('',#14594,0.250467171764045,0.25);
#1130=ELLIPSE('',#14595,0.250467171764045,0.25);
#1131=ELLIPSE('',#14606,1.00121873549684,1.00000000000007);
#1132=ELLIPSE('',#14620,1.00121873547499,1.00000000000007);
#1133=ELLIPSE('',#14634,1.50182807625858,1.5);
#1134=ELLIPSE('',#14638,1.50182807625857,1.5);
#1135=ELLIPSE('',#14659,0.500296846429959,0.5);
#1136=ELLIPSE('',#14690,0.500296846429953,0.499999999999993);
#1137=ELLIPSE('',#14693,1.99208500153634,1.9906);
#1138=ELLIPSE('',#14697,0.866082862858043,0.750018253425361);
#1139=ELLIPSE('',#14701,1.99208500153634,1.9906);
#1140=ELLIPSE('',#14704,0.866082882076768,0.750018287037125);
#1141=ELLIPSE('',#14706,1.28769080686974,1.08351612220335);
#1142=ELLIPSE('',#14732,0.879433001812034,0.765935430715668);
#1143=ELLIPSE('',#14735,12.0041135098904,12.);
#1144=ELLIPSE('',#14736,2.99162515522317,2.9906);
#1145=ELLIPSE('',#14743,2.99162515522317,2.9906);
#1146=ELLIPSE('',#14744,12.0041135098904,12.);
#1147=ELLIPSE('',#14748,1.50114306262704,1.5);
#1148=ELLIPSE('',#14751,2.0003492966399,2.);
#1149=ELLIPSE('',#14754,2.00034929663992,2.);
#1150=ELLIPSE('',#14755,0.874481409125027,0.757334222462107);
#1151=ELLIPSE('',#14760,0.874711688483775,0.75732826768908);
#1152=ELLIPSE('',#14761,0.874712962155915,0.757330473326546);
#1153=ELLIPSE('',#14764,8.43578438042808,3.5);
#1154=ELLIPSE('',#14765,2.63177722847286,1.0281049206285);
#1155=ELLIPSE('',#14768,2.00048522814541,2.);
#1156=ELLIPSE('',#14769,12.0073145315858,12.);
#1157=ELLIPSE('',#14771,2.00048522814538,2.);
#1158=ELLIPSE('',#14772,2.63177707999772,1.02810485927693);
#1159=ELLIPSE('',#14774,2.99242290318003,2.9906);
#1160=ELLIPSE('',#14779,1.83221745488834,1.8288);
#1161=ELLIPSE('',#14781,1.83221745488835,1.8288);
#1162=ELLIPSE('',#14783,0.50093434352809,0.5);
#1163=ELLIPSE('',#14784,0.50093434352809,0.5);
#1164=ELLIPSE('',#14788,0.50093434352809,0.5);
#1165=ELLIPSE('',#14789,0.50093434352809,0.5);
#1166=ELLIPSE('',#14794,1.83221745488834,1.8288);
#1167=ELLIPSE('',#14797,1.83221745488835,1.8288);
#1168=ELLIPSE('',#14799,0.250467171764045,0.25);
#1169=ELLIPSE('',#14800,0.250467171764045,0.25);
#1170=ELLIPSE('',#14804,0.250467171764045,0.25);
#1171=ELLIPSE('',#14805,0.250467171764045,0.25);
#1172=ELLIPSE('',#14809,1.00121873547499,1.00000000000007);
#1173=ELLIPSE('',#14810,1.00121873549684,1.00000000000007);
#1174=ELLIPSE('',#14811,1.00121871750572,1.);
#1175=ELLIPSE('',#14812,1.00121871750572,1.);
#1176=ELLIPSE('',#14848,1.50182807625858,1.5);
#1177=ELLIPSE('',#14852,1.50182807625857,1.5);
#1178=ELLIPSE('',#14859,0.500296846429959,0.5);
#1179=ELLIPSE('',#14864,0.500296846429953,0.499999999999993);
#1180=ELLIPSE('',#14912,1.99208500153634,1.9906);
#1181=ELLIPSE('',#14920,1.99208500153634,1.9906);
#1182=ELLIPSE('',#14925,1.50142819206189,1.5);
#1183=ELLIPSE('',#14926,0.50029684642996,0.5);
#1184=ELLIPSE('',#14927,0.50029684642996,0.5);
#1185=ELLIPSE('',#14928,1.50142819206189,1.5);
#1186=ELLIPSE('',#14940,0.991203814604084,0.990599999999977);
#1187=ELLIPSE('',#14941,0.991203814604031,0.990599999999977);
#1188=ELLIPSE('',#14943,1.00121871754947,1.);
#1189=ELLIPSE('',#14944,1.00121871752754,1.);
#1190=ELLIPSE('',#14953,1.83221745488834,1.8288);
#1191=ELLIPSE('',#14955,1.83221745488835,1.8288);
#1192=ELLIPSE('',#14957,0.50093434352809,0.5);
#1193=ELLIPSE('',#14958,0.50093434352809,0.5);
#1194=ELLIPSE('',#14962,0.50093434352809,0.5);
#1195=ELLIPSE('',#14963,0.50093434352809,0.5);
#1196=ELLIPSE('',#14968,1.83221745488834,1.8288);
#1197=ELLIPSE('',#14971,1.83221745488835,1.8288);
#1198=ELLIPSE('',#14973,0.250467171764045,0.25);
#1199=ELLIPSE('',#14974,0.250467171764045,0.25);
#1200=ELLIPSE('',#14978,0.250467171764045,0.25);
#1201=ELLIPSE('',#14979,0.250467171764045,0.25);
#1202=ELLIPSE('',#14990,1.00121873549684,1.00000000000007);
#1203=ELLIPSE('',#15004,1.00121873547499,1.00000000000007);
#1204=ELLIPSE('',#15018,1.50182807625858,1.5);
#1205=ELLIPSE('',#15022,1.50182807625857,1.5);
#1206=ELLIPSE('',#15043,0.500296846429959,0.5);
#1207=ELLIPSE('',#15075,0.500296846429953,0.499999999999993);
#1208=ELLIPSE('',#15077,1.99208500153634,1.9906);
#1209=ELLIPSE('',#15085,1.99208500153634,1.9906);
#1210=ELLIPSE('',#15090,1.50142819206189,1.5);
#1211=ELLIPSE('',#15091,0.50029684642996,0.5);
#1212=ELLIPSE('',#15092,0.50029684642996,0.5);
#1213=ELLIPSE('',#15093,1.50142819206189,1.5);
#1214=ELLIPSE('',#15113,3.24780049153801,3.);
#1215=ELLIPSE('',#15114,3.247800491538,3.);
#1216=ELLIPSE('',#15177,11.2463709268303,11.23951909547);
#1217=ELLIPSE('',#15179,71.6704960951957,1.71603636068508);
#1218=ELLIPSE('',#15180,2.00121908859764,2.);
#1219=ELLIPSE('',#15181,1.73939864495396,1.50229094318595);
#1220=ELLIPSE('',#15182,1.75599390339049,1.50710302816308);
#1221=ELLIPSE('',#15185,0.876635728159346,0.753176861589839);
#1222=ELLIPSE('',#15186,0.882142511885901,0.763474818888568);
#1223=ELLIPSE('',#15192,1.75599370634578,1.50710267164449);
#1224=ELLIPSE('',#15193,1.73939864494881,1.50229094317707);
#1225=ELLIPSE('',#15195,71.6704122717899,1.71603520666517);
#1226=ELLIPSE('',#15196,2.00121908859764,2.);
#1227=ELLIPSE('',#15198,0.876635728164547,0.753176861594046);
#1228=ELLIPSE('',#15201,0.882142511881116,0.763474818880665);
#1229=FACE_OUTER_BOUND('',#2088,.T.);
#1230=FACE_OUTER_BOUND('',#2089,.T.);
#1231=FACE_OUTER_BOUND('',#2090,.T.);
#1232=FACE_OUTER_BOUND('',#2092,.T.);
#1233=FACE_OUTER_BOUND('',#2093,.T.);
#1234=FACE_OUTER_BOUND('',#2094,.T.);
#1235=FACE_OUTER_BOUND('',#2095,.T.);
#1236=FACE_OUTER_BOUND('',#2096,.T.);
#1237=FACE_OUTER_BOUND('',#2097,.T.);
#1238=FACE_OUTER_BOUND('',#2098,.T.);
#1239=FACE_OUTER_BOUND('',#2099,.T.);
#1240=FACE_OUTER_BOUND('',#2100,.T.);
#1241=FACE_OUTER_BOUND('',#2101,.T.);
#1242=FACE_OUTER_BOUND('',#2102,.T.);
#1243=FACE_OUTER_BOUND('',#2103,.T.);
#1244=FACE_OUTER_BOUND('',#2104,.T.);
#1245=FACE_OUTER_BOUND('',#2105,.T.);
#1246=FACE_OUTER_BOUND('',#2106,.T.);
#1247=FACE_OUTER_BOUND('',#2107,.T.);
#1248=FACE_OUTER_BOUND('',#2108,.T.);
#1249=FACE_OUTER_BOUND('',#2109,.T.);
#1250=FACE_OUTER_BOUND('',#2110,.T.);
#1251=FACE_OUTER_BOUND('',#2111,.T.);
#1252=FACE_OUTER_BOUND('',#2112,.T.);
#1253=FACE_OUTER_BOUND('',#2113,.T.);
#1254=FACE_OUTER_BOUND('',#2114,.T.);
#1255=FACE_OUTER_BOUND('',#2115,.T.);
#1256=FACE_OUTER_BOUND('',#2116,.T.);
#1257=FACE_OUTER_BOUND('',#2117,.T.);
#1258=FACE_OUTER_BOUND('',#2118,.T.);
#1259=FACE_OUTER_BOUND('',#2119,.T.);
#1260=FACE_OUTER_BOUND('',#2120,.T.);
#1261=FACE_OUTER_BOUND('',#2121,.T.);
#1262=FACE_OUTER_BOUND('',#2122,.T.);
#1263=FACE_OUTER_BOUND('',#2123,.T.);
#1264=FACE_OUTER_BOUND('',#2125,.T.);
#1265=FACE_OUTER_BOUND('',#2126,.T.);
#1266=FACE_OUTER_BOUND('',#2127,.T.);
#1267=FACE_OUTER_BOUND('',#2128,.T.);
#1268=FACE_OUTER_BOUND('',#2129,.T.);
#1269=FACE_OUTER_BOUND('',#2130,.T.);
#1270=FACE_OUTER_BOUND('',#2131,.T.);
#1271=FACE_OUTER_BOUND('',#2132,.T.);
#1272=FACE_OUTER_BOUND('',#2133,.T.);
#1273=FACE_OUTER_BOUND('',#2134,.T.);
#1274=FACE_OUTER_BOUND('',#2135,.T.);
#1275=FACE_OUTER_BOUND('',#2136,.T.);
#1276=FACE_OUTER_BOUND('',#2137,.T.);
#1277=FACE_OUTER_BOUND('',#2138,.T.);
#1278=FACE_OUTER_BOUND('',#2139,.T.);
#1279=FACE_OUTER_BOUND('',#2140,.T.);
#1280=FACE_OUTER_BOUND('',#2141,.T.);
#1281=FACE_OUTER_BOUND('',#2142,.T.);
#1282=FACE_OUTER_BOUND('',#2143,.T.);
#1283=FACE_OUTER_BOUND('',#2144,.T.);
#1284=FACE_OUTER_BOUND('',#2145,.T.);
#1285=FACE_OUTER_BOUND('',#2146,.T.);
#1286=FACE_OUTER_BOUND('',#2147,.T.);
#1287=FACE_OUTER_BOUND('',#2148,.T.);
#1288=FACE_OUTER_BOUND('',#2149,.T.);
#1289=FACE_OUTER_BOUND('',#2150,.T.);
#1290=FACE_OUTER_BOUND('',#2151,.T.);
#1291=FACE_OUTER_BOUND('',#2152,.T.);
#1292=FACE_OUTER_BOUND('',#2153,.T.);
#1293=FACE_OUTER_BOUND('',#2154,.T.);
#1294=FACE_OUTER_BOUND('',#2155,.T.);
#1295=FACE_OUTER_BOUND('',#2156,.T.);
#1296=FACE_OUTER_BOUND('',#2157,.T.);
#1297=FACE_OUTER_BOUND('',#2158,.T.);
#1298=FACE_OUTER_BOUND('',#2159,.T.);
#1299=FACE_OUTER_BOUND('',#2160,.T.);
#1300=FACE_OUTER_BOUND('',#2161,.T.);
#1301=FACE_OUTER_BOUND('',#2162,.T.);
#1302=FACE_OUTER_BOUND('',#2163,.T.);
#1303=FACE_OUTER_BOUND('',#2164,.T.);
#1304=FACE_OUTER_BOUND('',#2165,.T.);
#1305=FACE_OUTER_BOUND('',#2166,.T.);
#1306=FACE_OUTER_BOUND('',#2167,.T.);
#1307=FACE_OUTER_BOUND('',#2168,.T.);
#1308=FACE_OUTER_BOUND('',#2169,.T.);
#1309=FACE_OUTER_BOUND('',#2170,.T.);
#1310=FACE_OUTER_BOUND('',#2171,.T.);
#1311=FACE_OUTER_BOUND('',#2172,.T.);
#1312=FACE_OUTER_BOUND('',#2173,.T.);
#1313=FACE_OUTER_BOUND('',#2174,.T.);
#1314=FACE_OUTER_BOUND('',#2175,.T.);
#1315=FACE_OUTER_BOUND('',#2176,.T.);
#1316=FACE_OUTER_BOUND('',#2177,.T.);
#1317=FACE_OUTER_BOUND('',#2178,.T.);
#1318=FACE_OUTER_BOUND('',#2179,.T.);
#1319=FACE_OUTER_BOUND('',#2180,.T.);
#1320=FACE_OUTER_BOUND('',#2181,.T.);
#1321=FACE_OUTER_BOUND('',#2182,.T.);
#1322=FACE_OUTER_BOUND('',#2183,.T.);
#1323=FACE_OUTER_BOUND('',#2184,.T.);
#1324=FACE_OUTER_BOUND('',#2185,.T.);
#1325=FACE_OUTER_BOUND('',#2186,.T.);
#1326=FACE_OUTER_BOUND('',#2187,.T.);
#1327=FACE_OUTER_BOUND('',#2188,.T.);
#1328=FACE_OUTER_BOUND('',#2189,.T.);
#1329=FACE_OUTER_BOUND('',#2190,.T.);
#1330=FACE_OUTER_BOUND('',#2191,.T.);
#1331=FACE_OUTER_BOUND('',#2192,.T.);
#1332=FACE_OUTER_BOUND('',#2193,.T.);
#1333=FACE_OUTER_BOUND('',#2194,.T.);
#1334=FACE_OUTER_BOUND('',#2195,.T.);
#1335=FACE_OUTER_BOUND('',#2196,.T.);
#1336=FACE_OUTER_BOUND('',#2197,.T.);
#1337=FACE_OUTER_BOUND('',#2198,.T.);
#1338=FACE_OUTER_BOUND('',#2199,.T.);
#1339=FACE_OUTER_BOUND('',#2200,.T.);
#1340=FACE_OUTER_BOUND('',#2201,.T.);
#1341=FACE_OUTER_BOUND('',#2202,.T.);
#1342=FACE_OUTER_BOUND('',#2203,.T.);
#1343=FACE_OUTER_BOUND('',#2204,.T.);
#1344=FACE_OUTER_BOUND('',#2205,.T.);
#1345=FACE_OUTER_BOUND('',#2206,.T.);
#1346=FACE_OUTER_BOUND('',#2207,.T.);
#1347=FACE_OUTER_BOUND('',#2208,.T.);
#1348=FACE_OUTER_BOUND('',#2210,.T.);
#1349=FACE_OUTER_BOUND('',#2211,.T.);
#1350=FACE_OUTER_BOUND('',#2212,.T.);
#1351=FACE_OUTER_BOUND('',#2213,.T.);
#1352=FACE_OUTER_BOUND('',#2214,.T.);
#1353=FACE_OUTER_BOUND('',#2215,.T.);
#1354=FACE_OUTER_BOUND('',#2216,.T.);
#1355=FACE_OUTER_BOUND('',#2217,.T.);
#1356=FACE_OUTER_BOUND('',#2218,.T.);
#1357=FACE_OUTER_BOUND('',#2219,.T.);
#1358=FACE_OUTER_BOUND('',#2220,.T.);
#1359=FACE_OUTER_BOUND('',#2221,.T.);
#1360=FACE_OUTER_BOUND('',#2222,.T.);
#1361=FACE_OUTER_BOUND('',#2223,.T.);
#1362=FACE_OUTER_BOUND('',#2224,.T.);
#1363=FACE_OUTER_BOUND('',#2225,.T.);
#1364=FACE_OUTER_BOUND('',#2226,.T.);
#1365=FACE_OUTER_BOUND('',#2227,.T.);
#1366=FACE_OUTER_BOUND('',#2228,.T.);
#1367=FACE_OUTER_BOUND('',#2229,.T.);
#1368=FACE_OUTER_BOUND('',#2230,.T.);
#1369=FACE_OUTER_BOUND('',#2231,.T.);
#1370=FACE_OUTER_BOUND('',#2232,.T.);
#1371=FACE_OUTER_BOUND('',#2233,.T.);
#1372=FACE_OUTER_BOUND('',#2234,.T.);
#1373=FACE_OUTER_BOUND('',#2235,.T.);
#1374=FACE_OUTER_BOUND('',#2238,.T.);
#1375=FACE_OUTER_BOUND('',#2239,.T.);
#1376=FACE_OUTER_BOUND('',#2240,.T.);
#1377=FACE_OUTER_BOUND('',#2241,.T.);
#1378=FACE_OUTER_BOUND('',#2242,.T.);
#1379=FACE_OUTER_BOUND('',#2243,.T.);
#1380=FACE_OUTER_BOUND('',#2244,.T.);
#1381=FACE_OUTER_BOUND('',#2245,.T.);
#1382=FACE_OUTER_BOUND('',#2246,.T.);
#1383=FACE_OUTER_BOUND('',#2247,.T.);
#1384=FACE_OUTER_BOUND('',#2248,.T.);
#1385=FACE_OUTER_BOUND('',#2249,.T.);
#1386=FACE_OUTER_BOUND('',#2250,.T.);
#1387=FACE_OUTER_BOUND('',#2251,.T.);
#1388=FACE_OUTER_BOUND('',#2252,.T.);
#1389=FACE_OUTER_BOUND('',#2253,.T.);
#1390=FACE_OUTER_BOUND('',#2254,.T.);
#1391=FACE_OUTER_BOUND('',#2255,.T.);
#1392=FACE_OUTER_BOUND('',#2256,.T.);
#1393=FACE_OUTER_BOUND('',#2257,.T.);
#1394=FACE_OUTER_BOUND('',#2258,.T.);
#1395=FACE_OUTER_BOUND('',#2259,.T.);
#1396=FACE_OUTER_BOUND('',#2260,.T.);
#1397=FACE_OUTER_BOUND('',#2261,.T.);
#1398=FACE_OUTER_BOUND('',#2262,.T.);
#1399=FACE_OUTER_BOUND('',#2263,.T.);
#1400=FACE_OUTER_BOUND('',#2264,.T.);
#1401=FACE_OUTER_BOUND('',#2265,.T.);
#1402=FACE_OUTER_BOUND('',#2266,.T.);
#1403=FACE_OUTER_BOUND('',#2267,.T.);
#1404=FACE_OUTER_BOUND('',#2268,.T.);
#1405=FACE_OUTER_BOUND('',#2269,.T.);
#1406=FACE_OUTER_BOUND('',#2270,.T.);
#1407=FACE_OUTER_BOUND('',#2271,.T.);
#1408=FACE_OUTER_BOUND('',#2272,.T.);
#1409=FACE_OUTER_BOUND('',#2273,.T.);
#1410=FACE_OUTER_BOUND('',#2274,.T.);
#1411=FACE_OUTER_BOUND('',#2275,.T.);
#1412=FACE_OUTER_BOUND('',#2276,.T.);
#1413=FACE_OUTER_BOUND('',#2277,.T.);
#1414=FACE_OUTER_BOUND('',#2278,.T.);
#1415=FACE_OUTER_BOUND('',#2279,.T.);
#1416=FACE_OUTER_BOUND('',#2280,.T.);
#1417=FACE_OUTER_BOUND('',#2281,.T.);
#1418=FACE_OUTER_BOUND('',#2282,.T.);
#1419=FACE_OUTER_BOUND('',#2283,.T.);
#1420=FACE_OUTER_BOUND('',#2284,.T.);
#1421=FACE_OUTER_BOUND('',#2285,.T.);
#1422=FACE_OUTER_BOUND('',#2286,.T.);
#1423=FACE_OUTER_BOUND('',#2287,.T.);
#1424=FACE_OUTER_BOUND('',#2288,.T.);
#1425=FACE_OUTER_BOUND('',#2289,.T.);
#1426=FACE_OUTER_BOUND('',#2290,.T.);
#1427=FACE_OUTER_BOUND('',#2291,.T.);
#1428=FACE_OUTER_BOUND('',#2292,.T.);
#1429=FACE_OUTER_BOUND('',#2293,.T.);
#1430=FACE_OUTER_BOUND('',#2294,.T.);
#1431=FACE_OUTER_BOUND('',#2295,.T.);
#1432=FACE_OUTER_BOUND('',#2296,.T.);
#1433=FACE_OUTER_BOUND('',#2297,.T.);
#1434=FACE_OUTER_BOUND('',#2298,.T.);
#1435=FACE_OUTER_BOUND('',#2299,.T.);
#1436=FACE_OUTER_BOUND('',#2300,.T.);
#1437=FACE_OUTER_BOUND('',#2301,.T.);
#1438=FACE_OUTER_BOUND('',#2302,.T.);
#1439=FACE_OUTER_BOUND('',#2303,.T.);
#1440=FACE_OUTER_BOUND('',#2304,.T.);
#1441=FACE_OUTER_BOUND('',#2305,.T.);
#1442=FACE_OUTER_BOUND('',#2306,.T.);
#1443=FACE_OUTER_BOUND('',#2307,.T.);
#1444=FACE_OUTER_BOUND('',#2308,.T.);
#1445=FACE_OUTER_BOUND('',#2309,.T.);
#1446=FACE_OUTER_BOUND('',#2310,.T.);
#1447=FACE_OUTER_BOUND('',#2311,.T.);
#1448=FACE_OUTER_BOUND('',#2312,.T.);
#1449=FACE_OUTER_BOUND('',#2313,.T.);
#1450=FACE_OUTER_BOUND('',#2314,.T.);
#1451=FACE_OUTER_BOUND('',#2315,.T.);
#1452=FACE_OUTER_BOUND('',#2316,.T.);
#1453=FACE_OUTER_BOUND('',#2317,.T.);
#1454=FACE_OUTER_BOUND('',#2318,.T.);
#1455=FACE_OUTER_BOUND('',#2319,.T.);
#1456=FACE_OUTER_BOUND('',#2320,.T.);
#1457=FACE_OUTER_BOUND('',#2321,.T.);
#1458=FACE_OUTER_BOUND('',#2322,.T.);
#1459=FACE_OUTER_BOUND('',#2323,.T.);
#1460=FACE_OUTER_BOUND('',#2324,.T.);
#1461=FACE_OUTER_BOUND('',#2325,.T.);
#1462=FACE_OUTER_BOUND('',#2326,.T.);
#1463=FACE_OUTER_BOUND('',#2327,.T.);
#1464=FACE_OUTER_BOUND('',#2328,.T.);
#1465=FACE_OUTER_BOUND('',#2329,.T.);
#1466=FACE_OUTER_BOUND('',#2330,.T.);
#1467=FACE_OUTER_BOUND('',#2331,.T.);
#1468=FACE_OUTER_BOUND('',#2332,.T.);
#1469=FACE_OUTER_BOUND('',#2333,.T.);
#1470=FACE_OUTER_BOUND('',#2334,.T.);
#1471=FACE_OUTER_BOUND('',#2335,.T.);
#1472=FACE_OUTER_BOUND('',#2336,.T.);
#1473=FACE_OUTER_BOUND('',#2337,.T.);
#1474=FACE_OUTER_BOUND('',#2338,.T.);
#1475=FACE_OUTER_BOUND('',#2339,.T.);
#1476=FACE_OUTER_BOUND('',#2340,.T.);
#1477=FACE_OUTER_BOUND('',#2341,.T.);
#1478=FACE_OUTER_BOUND('',#2342,.T.);
#1479=FACE_OUTER_BOUND('',#2343,.T.);
#1480=FACE_OUTER_BOUND('',#2344,.T.);
#1481=FACE_OUTER_BOUND('',#2345,.T.);
#1482=FACE_OUTER_BOUND('',#2346,.T.);
#1483=FACE_OUTER_BOUND('',#2347,.T.);
#1484=FACE_OUTER_BOUND('',#2348,.T.);
#1485=FACE_OUTER_BOUND('',#2349,.T.);
#1486=FACE_OUTER_BOUND('',#2350,.T.);
#1487=FACE_OUTER_BOUND('',#2351,.T.);
#1488=FACE_OUTER_BOUND('',#2352,.T.);
#1489=FACE_OUTER_BOUND('',#2353,.T.);
#1490=FACE_OUTER_BOUND('',#2354,.T.);
#1491=FACE_OUTER_BOUND('',#2355,.T.);
#1492=FACE_OUTER_BOUND('',#2356,.T.);
#1493=FACE_OUTER_BOUND('',#2357,.T.);
#1494=FACE_OUTER_BOUND('',#2358,.T.);
#1495=FACE_OUTER_BOUND('',#2359,.T.);
#1496=FACE_OUTER_BOUND('',#2360,.T.);
#1497=FACE_OUTER_BOUND('',#2361,.T.);
#1498=FACE_OUTER_BOUND('',#2362,.T.);
#1499=FACE_OUTER_BOUND('',#2363,.T.);
#1500=FACE_OUTER_BOUND('',#2364,.T.);
#1501=FACE_OUTER_BOUND('',#2365,.T.);
#1502=FACE_OUTER_BOUND('',#2366,.T.);
#1503=FACE_OUTER_BOUND('',#2367,.T.);
#1504=FACE_OUTER_BOUND('',#2368,.T.);
#1505=FACE_OUTER_BOUND('',#2369,.T.);
#1506=FACE_OUTER_BOUND('',#2370,.T.);
#1507=FACE_OUTER_BOUND('',#2371,.T.);
#1508=FACE_OUTER_BOUND('',#2372,.T.);
#1509=FACE_OUTER_BOUND('',#2373,.T.);
#1510=FACE_OUTER_BOUND('',#2374,.T.);
#1511=FACE_OUTER_BOUND('',#2375,.T.);
#1512=FACE_OUTER_BOUND('',#2376,.T.);
#1513=FACE_OUTER_BOUND('',#2377,.T.);
#1514=FACE_OUTER_BOUND('',#2378,.T.);
#1515=FACE_OUTER_BOUND('',#2379,.T.);
#1516=FACE_OUTER_BOUND('',#2380,.T.);
#1517=FACE_OUTER_BOUND('',#2381,.T.);
#1518=FACE_OUTER_BOUND('',#2382,.T.);
#1519=FACE_OUTER_BOUND('',#2383,.T.);
#1520=FACE_OUTER_BOUND('',#2384,.T.);
#1521=FACE_OUTER_BOUND('',#2385,.T.);
#1522=FACE_OUTER_BOUND('',#2386,.T.);
#1523=FACE_OUTER_BOUND('',#2387,.T.);
#1524=FACE_OUTER_BOUND('',#2388,.T.);
#1525=FACE_OUTER_BOUND('',#2389,.T.);
#1526=FACE_OUTER_BOUND('',#2390,.T.);
#1527=FACE_OUTER_BOUND('',#2391,.T.);
#1528=FACE_OUTER_BOUND('',#2392,.T.);
#1529=FACE_OUTER_BOUND('',#2393,.T.);
#1530=FACE_OUTER_BOUND('',#2394,.T.);
#1531=FACE_OUTER_BOUND('',#2395,.T.);
#1532=FACE_OUTER_BOUND('',#2396,.T.);
#1533=FACE_OUTER_BOUND('',#2397,.T.);
#1534=FACE_OUTER_BOUND('',#2398,.T.);
#1535=FACE_OUTER_BOUND('',#2399,.T.);
#1536=FACE_OUTER_BOUND('',#2400,.T.);
#1537=FACE_OUTER_BOUND('',#2401,.T.);
#1538=FACE_OUTER_BOUND('',#2402,.T.);
#1539=FACE_OUTER_BOUND('',#2403,.T.);
#1540=FACE_OUTER_BOUND('',#2405,.T.);
#1541=FACE_OUTER_BOUND('',#2406,.T.);
#1542=FACE_OUTER_BOUND('',#2407,.T.);
#1543=FACE_OUTER_BOUND('',#2408,.T.);
#1544=FACE_OUTER_BOUND('',#2409,.T.);
#1545=FACE_OUTER_BOUND('',#2410,.T.);
#1546=FACE_OUTER_BOUND('',#2411,.T.);
#1547=FACE_OUTER_BOUND('',#2412,.T.);
#1548=FACE_OUTER_BOUND('',#2413,.T.);
#1549=FACE_OUTER_BOUND('',#2414,.T.);
#1550=FACE_OUTER_BOUND('',#2415,.T.);
#1551=FACE_OUTER_BOUND('',#2416,.T.);
#1552=FACE_OUTER_BOUND('',#2417,.T.);
#1553=FACE_OUTER_BOUND('',#2418,.T.);
#1554=FACE_OUTER_BOUND('',#2419,.T.);
#1555=FACE_OUTER_BOUND('',#2420,.T.);
#1556=FACE_OUTER_BOUND('',#2421,.T.);
#1557=FACE_OUTER_BOUND('',#2422,.T.);
#1558=FACE_OUTER_BOUND('',#2423,.T.);
#1559=FACE_OUTER_BOUND('',#2424,.T.);
#1560=FACE_OUTER_BOUND('',#2425,.T.);
#1561=FACE_OUTER_BOUND('',#2426,.T.);
#1562=FACE_OUTER_BOUND('',#2427,.T.);
#1563=FACE_OUTER_BOUND('',#2428,.T.);
#1564=FACE_OUTER_BOUND('',#2429,.T.);
#1565=FACE_OUTER_BOUND('',#2430,.T.);
#1566=FACE_OUTER_BOUND('',#2431,.T.);
#1567=FACE_OUTER_BOUND('',#2432,.T.);
#1568=FACE_OUTER_BOUND('',#2433,.T.);
#1569=FACE_OUTER_BOUND('',#2434,.T.);
#1570=FACE_OUTER_BOUND('',#2435,.T.);
#1571=FACE_OUTER_BOUND('',#2436,.T.);
#1572=FACE_OUTER_BOUND('',#2437,.T.);
#1573=FACE_OUTER_BOUND('',#2438,.T.);
#1574=FACE_OUTER_BOUND('',#2439,.T.);
#1575=FACE_OUTER_BOUND('',#2440,.T.);
#1576=FACE_OUTER_BOUND('',#2441,.T.);
#1577=FACE_OUTER_BOUND('',#2442,.T.);
#1578=FACE_OUTER_BOUND('',#2443,.T.);
#1579=FACE_OUTER_BOUND('',#2444,.T.);
#1580=FACE_OUTER_BOUND('',#2445,.T.);
#1581=FACE_OUTER_BOUND('',#2446,.T.);
#1582=FACE_OUTER_BOUND('',#2447,.T.);
#1583=FACE_OUTER_BOUND('',#2448,.T.);
#1584=FACE_OUTER_BOUND('',#2449,.T.);
#1585=FACE_OUTER_BOUND('',#2450,.T.);
#1586=FACE_OUTER_BOUND('',#2451,.T.);
#1587=FACE_OUTER_BOUND('',#2452,.T.);
#1588=FACE_OUTER_BOUND('',#2453,.T.);
#1589=FACE_OUTER_BOUND('',#2454,.T.);
#1590=FACE_OUTER_BOUND('',#2455,.T.);
#1591=FACE_OUTER_BOUND('',#2456,.T.);
#1592=FACE_OUTER_BOUND('',#2457,.T.);
#1593=FACE_OUTER_BOUND('',#2458,.T.);
#1594=FACE_OUTER_BOUND('',#2459,.T.);
#1595=FACE_OUTER_BOUND('',#2460,.T.);
#1596=FACE_OUTER_BOUND('',#2461,.T.);
#1597=FACE_OUTER_BOUND('',#2462,.T.);
#1598=FACE_OUTER_BOUND('',#2463,.T.);
#1599=FACE_OUTER_BOUND('',#2464,.T.);
#1600=FACE_OUTER_BOUND('',#2465,.T.);
#1601=FACE_OUTER_BOUND('',#2466,.T.);
#1602=FACE_OUTER_BOUND('',#2467,.T.);
#1603=FACE_OUTER_BOUND('',#2468,.T.);
#1604=FACE_OUTER_BOUND('',#2469,.T.);
#1605=FACE_OUTER_BOUND('',#2470,.T.);
#1606=FACE_OUTER_BOUND('',#2471,.T.);
#1607=FACE_OUTER_BOUND('',#2472,.T.);
#1608=FACE_OUTER_BOUND('',#2473,.T.);
#1609=FACE_OUTER_BOUND('',#2474,.T.);
#1610=FACE_OUTER_BOUND('',#2475,.T.);
#1611=FACE_OUTER_BOUND('',#2476,.T.);
#1612=FACE_OUTER_BOUND('',#2477,.T.);
#1613=FACE_OUTER_BOUND('',#2478,.T.);
#1614=FACE_OUTER_BOUND('',#2479,.T.);
#1615=FACE_OUTER_BOUND('',#2480,.T.);
#1616=FACE_OUTER_BOUND('',#2481,.T.);
#1617=FACE_OUTER_BOUND('',#2482,.T.);
#1618=FACE_OUTER_BOUND('',#2483,.T.);
#1619=FACE_OUTER_BOUND('',#2484,.T.);
#1620=FACE_OUTER_BOUND('',#2485,.T.);
#1621=FACE_OUTER_BOUND('',#2486,.T.);
#1622=FACE_OUTER_BOUND('',#2487,.T.);
#1623=FACE_OUTER_BOUND('',#2488,.T.);
#1624=FACE_OUTER_BOUND('',#2489,.T.);
#1625=FACE_OUTER_BOUND('',#2490,.T.);
#1626=FACE_OUTER_BOUND('',#2491,.T.);
#1627=FACE_OUTER_BOUND('',#2492,.T.);
#1628=FACE_OUTER_BOUND('',#2493,.T.);
#1629=FACE_OUTER_BOUND('',#2494,.T.);
#1630=FACE_OUTER_BOUND('',#2495,.T.);
#1631=FACE_OUTER_BOUND('',#2496,.T.);
#1632=FACE_OUTER_BOUND('',#2497,.T.);
#1633=FACE_OUTER_BOUND('',#2498,.T.);
#1634=FACE_OUTER_BOUND('',#2499,.T.);
#1635=FACE_OUTER_BOUND('',#2500,.T.);
#1636=FACE_OUTER_BOUND('',#2501,.T.);
#1637=FACE_OUTER_BOUND('',#2502,.T.);
#1638=FACE_OUTER_BOUND('',#2503,.T.);
#1639=FACE_OUTER_BOUND('',#2504,.T.);
#1640=FACE_OUTER_BOUND('',#2505,.T.);
#1641=FACE_OUTER_BOUND('',#2507,.T.);
#1642=FACE_OUTER_BOUND('',#2508,.T.);
#1643=FACE_OUTER_BOUND('',#2509,.T.);
#1644=FACE_OUTER_BOUND('',#2510,.T.);
#1645=FACE_OUTER_BOUND('',#2511,.T.);
#1646=FACE_OUTER_BOUND('',#2512,.T.);
#1647=FACE_OUTER_BOUND('',#2513,.T.);
#1648=FACE_OUTER_BOUND('',#2514,.T.);
#1649=FACE_OUTER_BOUND('',#2515,.T.);
#1650=FACE_OUTER_BOUND('',#2516,.T.);
#1651=FACE_OUTER_BOUND('',#2517,.T.);
#1652=FACE_OUTER_BOUND('',#2518,.T.);
#1653=FACE_OUTER_BOUND('',#2519,.T.);
#1654=FACE_OUTER_BOUND('',#2520,.T.);
#1655=FACE_OUTER_BOUND('',#2521,.T.);
#1656=FACE_OUTER_BOUND('',#2522,.T.);
#1657=FACE_OUTER_BOUND('',#2523,.T.);
#1658=FACE_OUTER_BOUND('',#2524,.T.);
#1659=FACE_OUTER_BOUND('',#2525,.T.);
#1660=FACE_OUTER_BOUND('',#2526,.T.);
#1661=FACE_OUTER_BOUND('',#2527,.T.);
#1662=FACE_OUTER_BOUND('',#2528,.T.);
#1663=FACE_OUTER_BOUND('',#2529,.T.);
#1664=FACE_OUTER_BOUND('',#2530,.T.);
#1665=FACE_OUTER_BOUND('',#2531,.T.);
#1666=FACE_OUTER_BOUND('',#2532,.T.);
#1667=FACE_OUTER_BOUND('',#2533,.T.);
#1668=FACE_OUTER_BOUND('',#2534,.T.);
#1669=FACE_OUTER_BOUND('',#2535,.T.);
#1670=FACE_OUTER_BOUND('',#2536,.T.);
#1671=FACE_OUTER_BOUND('',#2537,.T.);
#1672=FACE_OUTER_BOUND('',#2538,.T.);
#1673=FACE_OUTER_BOUND('',#2539,.T.);
#1674=FACE_OUTER_BOUND('',#2540,.T.);
#1675=FACE_OUTER_BOUND('',#2541,.T.);
#1676=FACE_OUTER_BOUND('',#2542,.T.);
#1677=FACE_OUTER_BOUND('',#2543,.T.);
#1678=FACE_OUTER_BOUND('',#2544,.T.);
#1679=FACE_OUTER_BOUND('',#2545,.T.);
#1680=FACE_OUTER_BOUND('',#2546,.T.);
#1681=FACE_OUTER_BOUND('',#2547,.T.);
#1682=FACE_OUTER_BOUND('',#2548,.T.);
#1683=FACE_OUTER_BOUND('',#2549,.T.);
#1684=FACE_OUTER_BOUND('',#2550,.T.);
#1685=FACE_OUTER_BOUND('',#2551,.T.);
#1686=FACE_OUTER_BOUND('',#2552,.T.);
#1687=FACE_OUTER_BOUND('',#2553,.T.);
#1688=FACE_OUTER_BOUND('',#2554,.T.);
#1689=FACE_OUTER_BOUND('',#2555,.T.);
#1690=FACE_OUTER_BOUND('',#2556,.T.);
#1691=FACE_OUTER_BOUND('',#2557,.T.);
#1692=FACE_OUTER_BOUND('',#2558,.T.);
#1693=FACE_OUTER_BOUND('',#2559,.T.);
#1694=FACE_OUTER_BOUND('',#2560,.T.);
#1695=FACE_OUTER_BOUND('',#2561,.T.);
#1696=FACE_OUTER_BOUND('',#2562,.T.);
#1697=FACE_OUTER_BOUND('',#2563,.T.);
#1698=FACE_OUTER_BOUND('',#2564,.T.);
#1699=FACE_OUTER_BOUND('',#2565,.T.);
#1700=FACE_OUTER_BOUND('',#2566,.T.);
#1701=FACE_OUTER_BOUND('',#2567,.T.);
#1702=FACE_OUTER_BOUND('',#2568,.T.);
#1703=FACE_OUTER_BOUND('',#2569,.T.);
#1704=FACE_OUTER_BOUND('',#2570,.T.);
#1705=FACE_OUTER_BOUND('',#2571,.T.);
#1706=FACE_OUTER_BOUND('',#2572,.T.);
#1707=FACE_OUTER_BOUND('',#2573,.T.);
#1708=FACE_OUTER_BOUND('',#2574,.T.);
#1709=FACE_OUTER_BOUND('',#2575,.T.);
#1710=FACE_OUTER_BOUND('',#2576,.T.);
#1711=FACE_OUTER_BOUND('',#2577,.T.);
#1712=FACE_OUTER_BOUND('',#2578,.T.);
#1713=FACE_OUTER_BOUND('',#2579,.T.);
#1714=FACE_OUTER_BOUND('',#2580,.T.);
#1715=FACE_OUTER_BOUND('',#2581,.T.);
#1716=FACE_OUTER_BOUND('',#2582,.T.);
#1717=FACE_OUTER_BOUND('',#2583,.T.);
#1718=FACE_OUTER_BOUND('',#2584,.T.);
#1719=FACE_OUTER_BOUND('',#2585,.T.);
#1720=FACE_OUTER_BOUND('',#2586,.T.);
#1721=FACE_OUTER_BOUND('',#2587,.T.);
#1722=FACE_OUTER_BOUND('',#2588,.T.);
#1723=FACE_OUTER_BOUND('',#2589,.T.);
#1724=FACE_OUTER_BOUND('',#2590,.T.);
#1725=FACE_OUTER_BOUND('',#2591,.T.);
#1726=FACE_OUTER_BOUND('',#2592,.T.);
#1727=FACE_OUTER_BOUND('',#2593,.T.);
#1728=FACE_OUTER_BOUND('',#2594,.T.);
#1729=FACE_OUTER_BOUND('',#2595,.T.);
#1730=FACE_OUTER_BOUND('',#2596,.T.);
#1731=FACE_OUTER_BOUND('',#2597,.T.);
#1732=FACE_OUTER_BOUND('',#2598,.T.);
#1733=FACE_OUTER_BOUND('',#2599,.T.);
#1734=FACE_OUTER_BOUND('',#2600,.T.);
#1735=FACE_OUTER_BOUND('',#2601,.T.);
#1736=FACE_OUTER_BOUND('',#2602,.T.);
#1737=FACE_OUTER_BOUND('',#2603,.T.);
#1738=FACE_OUTER_BOUND('',#2604,.T.);
#1739=FACE_OUTER_BOUND('',#2605,.T.);
#1740=FACE_OUTER_BOUND('',#2606,.T.);
#1741=FACE_OUTER_BOUND('',#2607,.T.);
#1742=FACE_OUTER_BOUND('',#2608,.T.);
#1743=FACE_OUTER_BOUND('',#2609,.T.);
#1744=FACE_OUTER_BOUND('',#2610,.T.);
#1745=FACE_OUTER_BOUND('',#2611,.T.);
#1746=FACE_OUTER_BOUND('',#2612,.T.);
#1747=FACE_OUTER_BOUND('',#2613,.T.);
#1748=FACE_OUTER_BOUND('',#2614,.T.);
#1749=FACE_OUTER_BOUND('',#2615,.T.);
#1750=FACE_OUTER_BOUND('',#2616,.T.);
#1751=FACE_OUTER_BOUND('',#2617,.T.);
#1752=FACE_OUTER_BOUND('',#2618,.T.);
#1753=FACE_OUTER_BOUND('',#2619,.T.);
#1754=FACE_OUTER_BOUND('',#2620,.T.);
#1755=FACE_OUTER_BOUND('',#2621,.T.);
#1756=FACE_OUTER_BOUND('',#2623,.T.);
#1757=FACE_OUTER_BOUND('',#2624,.T.);
#1758=FACE_OUTER_BOUND('',#2625,.T.);
#1759=FACE_OUTER_BOUND('',#2626,.T.);
#1760=FACE_OUTER_BOUND('',#2627,.T.);
#1761=FACE_OUTER_BOUND('',#2628,.T.);
#1762=FACE_OUTER_BOUND('',#2629,.T.);
#1763=FACE_OUTER_BOUND('',#2630,.T.);
#1764=FACE_OUTER_BOUND('',#2631,.T.);
#1765=FACE_OUTER_BOUND('',#2632,.T.);
#1766=FACE_OUTER_BOUND('',#2633,.T.);
#1767=FACE_OUTER_BOUND('',#2634,.T.);
#1768=FACE_OUTER_BOUND('',#2635,.T.);
#1769=FACE_OUTER_BOUND('',#2636,.T.);
#1770=FACE_OUTER_BOUND('',#2637,.T.);
#1771=FACE_OUTER_BOUND('',#2638,.T.);
#1772=FACE_OUTER_BOUND('',#2639,.T.);
#1773=FACE_OUTER_BOUND('',#2640,.T.);
#1774=FACE_OUTER_BOUND('',#2641,.T.);
#1775=FACE_OUTER_BOUND('',#2642,.T.);
#1776=FACE_OUTER_BOUND('',#2643,.T.);
#1777=FACE_OUTER_BOUND('',#2644,.T.);
#1778=FACE_OUTER_BOUND('',#2645,.T.);
#1779=FACE_OUTER_BOUND('',#2646,.T.);
#1780=FACE_OUTER_BOUND('',#2647,.T.);
#1781=FACE_OUTER_BOUND('',#2648,.T.);
#1782=FACE_OUTER_BOUND('',#2649,.T.);
#1783=FACE_OUTER_BOUND('',#2650,.T.);
#1784=FACE_OUTER_BOUND('',#2651,.T.);
#1785=FACE_OUTER_BOUND('',#2652,.T.);
#1786=FACE_OUTER_BOUND('',#2653,.T.);
#1787=FACE_OUTER_BOUND('',#2654,.T.);
#1788=FACE_OUTER_BOUND('',#2655,.T.);
#1789=FACE_OUTER_BOUND('',#2656,.T.);
#1790=FACE_OUTER_BOUND('',#2657,.T.);
#1791=FACE_OUTER_BOUND('',#2658,.T.);
#1792=FACE_OUTER_BOUND('',#2659,.T.);
#1793=FACE_OUTER_BOUND('',#2660,.T.);
#1794=FACE_OUTER_BOUND('',#2661,.T.);
#1795=FACE_OUTER_BOUND('',#2662,.T.);
#1796=FACE_OUTER_BOUND('',#2664,.T.);
#1797=FACE_OUTER_BOUND('',#2665,.T.);
#1798=FACE_OUTER_BOUND('',#2666,.T.);
#1799=FACE_OUTER_BOUND('',#2667,.T.);
#1800=FACE_OUTER_BOUND('',#2668,.T.);
#1801=FACE_OUTER_BOUND('',#2669,.T.);
#1802=FACE_OUTER_BOUND('',#2670,.T.);
#1803=FACE_OUTER_BOUND('',#2671,.T.);
#1804=FACE_OUTER_BOUND('',#2672,.T.);
#1805=FACE_OUTER_BOUND('',#2673,.T.);
#1806=FACE_OUTER_BOUND('',#2674,.T.);
#1807=FACE_OUTER_BOUND('',#2675,.T.);
#1808=FACE_OUTER_BOUND('',#2676,.T.);
#1809=FACE_OUTER_BOUND('',#2677,.T.);
#1810=FACE_OUTER_BOUND('',#2678,.T.);
#1811=FACE_OUTER_BOUND('',#2679,.T.);
#1812=FACE_OUTER_BOUND('',#2680,.T.);
#1813=FACE_OUTER_BOUND('',#2681,.T.);
#1814=FACE_OUTER_BOUND('',#2682,.T.);
#1815=FACE_OUTER_BOUND('',#2683,.T.);
#1816=FACE_OUTER_BOUND('',#2684,.T.);
#1817=FACE_OUTER_BOUND('',#2685,.T.);
#1818=FACE_OUTER_BOUND('',#2686,.T.);
#1819=FACE_OUTER_BOUND('',#2687,.T.);
#1820=FACE_OUTER_BOUND('',#2688,.T.);
#1821=FACE_OUTER_BOUND('',#2689,.T.);
#1822=FACE_OUTER_BOUND('',#2690,.T.);
#1823=FACE_OUTER_BOUND('',#2691,.T.);
#1824=FACE_OUTER_BOUND('',#2692,.T.);
#1825=FACE_OUTER_BOUND('',#2693,.T.);
#1826=FACE_OUTER_BOUND('',#2694,.T.);
#1827=FACE_OUTER_BOUND('',#2695,.T.);
#1828=FACE_OUTER_BOUND('',#2696,.T.);
#1829=FACE_OUTER_BOUND('',#2697,.T.);
#1830=FACE_OUTER_BOUND('',#2698,.T.);
#1831=FACE_OUTER_BOUND('',#2699,.T.);
#1832=FACE_OUTER_BOUND('',#2700,.T.);
#1833=FACE_OUTER_BOUND('',#2701,.T.);
#1834=FACE_OUTER_BOUND('',#2702,.T.);
#1835=FACE_OUTER_BOUND('',#2703,.T.);
#1836=FACE_OUTER_BOUND('',#2704,.T.);
#1837=FACE_OUTER_BOUND('',#2705,.T.);
#1838=FACE_OUTER_BOUND('',#2706,.T.);
#1839=FACE_OUTER_BOUND('',#2707,.T.);
#1840=FACE_OUTER_BOUND('',#2708,.T.);
#1841=FACE_OUTER_BOUND('',#2709,.T.);
#1842=FACE_OUTER_BOUND('',#2710,.T.);
#1843=FACE_OUTER_BOUND('',#2711,.T.);
#1844=FACE_OUTER_BOUND('',#2712,.T.);
#1845=FACE_OUTER_BOUND('',#2713,.T.);
#1846=FACE_OUTER_BOUND('',#2714,.T.);
#1847=FACE_OUTER_BOUND('',#2715,.T.);
#1848=FACE_OUTER_BOUND('',#2716,.T.);
#1849=FACE_OUTER_BOUND('',#2717,.T.);
#1850=FACE_OUTER_BOUND('',#2718,.T.);
#1851=FACE_OUTER_BOUND('',#2719,.T.);
#1852=FACE_OUTER_BOUND('',#2720,.T.);
#1853=FACE_OUTER_BOUND('',#2721,.T.);
#1854=FACE_OUTER_BOUND('',#2722,.T.);
#1855=FACE_OUTER_BOUND('',#2723,.T.);
#1856=FACE_OUTER_BOUND('',#2724,.T.);
#1857=FACE_OUTER_BOUND('',#2725,.T.);
#1858=FACE_OUTER_BOUND('',#2726,.T.);
#1859=FACE_OUTER_BOUND('',#2727,.T.);
#1860=FACE_OUTER_BOUND('',#2728,.T.);
#1861=FACE_OUTER_BOUND('',#2729,.T.);
#1862=FACE_OUTER_BOUND('',#2730,.T.);
#1863=FACE_OUTER_BOUND('',#2731,.T.);
#1864=FACE_OUTER_BOUND('',#2732,.T.);
#1865=FACE_OUTER_BOUND('',#2733,.T.);
#1866=FACE_OUTER_BOUND('',#2734,.T.);
#1867=FACE_OUTER_BOUND('',#2735,.T.);
#1868=FACE_OUTER_BOUND('',#2736,.T.);
#1869=FACE_OUTER_BOUND('',#2737,.T.);
#1870=FACE_OUTER_BOUND('',#2738,.T.);
#1871=FACE_OUTER_BOUND('',#2739,.T.);
#1872=FACE_OUTER_BOUND('',#2740,.T.);
#1873=FACE_OUTER_BOUND('',#2741,.T.);
#1874=FACE_OUTER_BOUND('',#2742,.T.);
#1875=FACE_OUTER_BOUND('',#2743,.T.);
#1876=FACE_OUTER_BOUND('',#2744,.T.);
#1877=FACE_OUTER_BOUND('',#2745,.T.);
#1878=FACE_OUTER_BOUND('',#2746,.T.);
#1879=FACE_OUTER_BOUND('',#2747,.T.);
#1880=FACE_OUTER_BOUND('',#2748,.T.);
#1881=FACE_OUTER_BOUND('',#2749,.T.);
#1882=FACE_OUTER_BOUND('',#2750,.T.);
#1883=FACE_OUTER_BOUND('',#2751,.T.);
#1884=FACE_OUTER_BOUND('',#2752,.T.);
#1885=FACE_OUTER_BOUND('',#2753,.T.);
#1886=FACE_OUTER_BOUND('',#2754,.T.);
#1887=FACE_OUTER_BOUND('',#2755,.T.);
#1888=FACE_OUTER_BOUND('',#2756,.T.);
#1889=FACE_OUTER_BOUND('',#2757,.T.);
#1890=FACE_OUTER_BOUND('',#2758,.T.);
#1891=FACE_OUTER_BOUND('',#2759,.T.);
#1892=FACE_OUTER_BOUND('',#2760,.T.);
#1893=FACE_OUTER_BOUND('',#2761,.T.);
#1894=FACE_OUTER_BOUND('',#2762,.T.);
#1895=FACE_OUTER_BOUND('',#2763,.T.);
#1896=FACE_OUTER_BOUND('',#2764,.T.);
#1897=FACE_OUTER_BOUND('',#2766,.T.);
#1898=FACE_OUTER_BOUND('',#2767,.T.);
#1899=FACE_OUTER_BOUND('',#2768,.T.);
#1900=FACE_OUTER_BOUND('',#2769,.T.);
#1901=FACE_OUTER_BOUND('',#2770,.T.);
#1902=FACE_OUTER_BOUND('',#2771,.T.);
#1903=FACE_OUTER_BOUND('',#2772,.T.);
#1904=FACE_OUTER_BOUND('',#2773,.T.);
#1905=FACE_OUTER_BOUND('',#2774,.T.);
#1906=FACE_OUTER_BOUND('',#2775,.T.);
#1907=FACE_OUTER_BOUND('',#2776,.T.);
#1908=FACE_OUTER_BOUND('',#2777,.T.);
#1909=FACE_OUTER_BOUND('',#2778,.T.);
#1910=FACE_OUTER_BOUND('',#2779,.T.);
#1911=FACE_OUTER_BOUND('',#2780,.T.);
#1912=FACE_OUTER_BOUND('',#2781,.T.);
#1913=FACE_OUTER_BOUND('',#2782,.T.);
#1914=FACE_OUTER_BOUND('',#2783,.T.);
#1915=FACE_OUTER_BOUND('',#2784,.T.);
#1916=FACE_OUTER_BOUND('',#2785,.T.);
#1917=FACE_OUTER_BOUND('',#2786,.T.);
#1918=FACE_OUTER_BOUND('',#2787,.T.);
#1919=FACE_OUTER_BOUND('',#2788,.T.);
#1920=FACE_OUTER_BOUND('',#2789,.T.);
#1921=FACE_OUTER_BOUND('',#2790,.T.);
#1922=FACE_OUTER_BOUND('',#2791,.T.);
#1923=FACE_OUTER_BOUND('',#2792,.T.);
#1924=FACE_OUTER_BOUND('',#2793,.T.);
#1925=FACE_OUTER_BOUND('',#2794,.T.);
#1926=FACE_OUTER_BOUND('',#2795,.T.);
#1927=FACE_OUTER_BOUND('',#2796,.T.);
#1928=FACE_OUTER_BOUND('',#2797,.T.);
#1929=FACE_OUTER_BOUND('',#2798,.T.);
#1930=FACE_OUTER_BOUND('',#2799,.T.);
#1931=FACE_OUTER_BOUND('',#2800,.T.);
#1932=FACE_OUTER_BOUND('',#2801,.T.);
#1933=FACE_OUTER_BOUND('',#2802,.T.);
#1934=FACE_OUTER_BOUND('',#2803,.T.);
#1935=FACE_OUTER_BOUND('',#2804,.T.);
#1936=FACE_OUTER_BOUND('',#2805,.T.);
#1937=FACE_OUTER_BOUND('',#2806,.T.);
#1938=FACE_OUTER_BOUND('',#2807,.T.);
#1939=FACE_OUTER_BOUND('',#2808,.T.);
#1940=FACE_OUTER_BOUND('',#2809,.T.);
#1941=FACE_OUTER_BOUND('',#2810,.T.);
#1942=FACE_OUTER_BOUND('',#2811,.T.);
#1943=FACE_OUTER_BOUND('',#2812,.T.);
#1944=FACE_OUTER_BOUND('',#2813,.T.);
#1945=FACE_OUTER_BOUND('',#2814,.T.);
#1946=FACE_OUTER_BOUND('',#2815,.T.);
#1947=FACE_OUTER_BOUND('',#2816,.T.);
#1948=FACE_OUTER_BOUND('',#2817,.T.);
#1949=FACE_OUTER_BOUND('',#2818,.T.);
#1950=FACE_OUTER_BOUND('',#2820,.T.);
#1951=FACE_OUTER_BOUND('',#2823,.T.);
#1952=FACE_OUTER_BOUND('',#2824,.T.);
#1953=FACE_OUTER_BOUND('',#2825,.T.);
#1954=FACE_OUTER_BOUND('',#2826,.T.);
#1955=FACE_OUTER_BOUND('',#2827,.T.);
#1956=FACE_OUTER_BOUND('',#2828,.T.);
#1957=FACE_OUTER_BOUND('',#2829,.T.);
#1958=FACE_OUTER_BOUND('',#2830,.T.);
#1959=FACE_OUTER_BOUND('',#2831,.T.);
#1960=FACE_OUTER_BOUND('',#2832,.T.);
#1961=FACE_OUTER_BOUND('',#2833,.T.);
#1962=FACE_OUTER_BOUND('',#2834,.T.);
#1963=FACE_OUTER_BOUND('',#2835,.T.);
#1964=FACE_OUTER_BOUND('',#2836,.T.);
#1965=FACE_OUTER_BOUND('',#2837,.T.);
#1966=FACE_OUTER_BOUND('',#2838,.T.);
#1967=FACE_OUTER_BOUND('',#2839,.T.);
#1968=FACE_OUTER_BOUND('',#2840,.T.);
#1969=FACE_OUTER_BOUND('',#2841,.T.);
#1970=FACE_OUTER_BOUND('',#2842,.T.);
#1971=FACE_OUTER_BOUND('',#2843,.T.);
#1972=FACE_OUTER_BOUND('',#2844,.T.);
#1973=FACE_OUTER_BOUND('',#2845,.T.);
#1974=FACE_OUTER_BOUND('',#2846,.T.);
#1975=FACE_OUTER_BOUND('',#2847,.T.);
#1976=FACE_OUTER_BOUND('',#2848,.T.);
#1977=FACE_OUTER_BOUND('',#2849,.T.);
#1978=FACE_OUTER_BOUND('',#2850,.T.);
#1979=FACE_OUTER_BOUND('',#2851,.T.);
#1980=FACE_OUTER_BOUND('',#2852,.T.);
#1981=FACE_OUTER_BOUND('',#2853,.T.);
#1982=FACE_OUTER_BOUND('',#2854,.T.);
#1983=FACE_OUTER_BOUND('',#2855,.T.);
#1984=FACE_OUTER_BOUND('',#2856,.T.);
#1985=FACE_OUTER_BOUND('',#2857,.T.);
#1986=FACE_OUTER_BOUND('',#2858,.T.);
#1987=FACE_OUTER_BOUND('',#2859,.T.);
#1988=FACE_OUTER_BOUND('',#2860,.T.);
#1989=FACE_OUTER_BOUND('',#2861,.T.);
#1990=FACE_OUTER_BOUND('',#2862,.T.);
#1991=FACE_OUTER_BOUND('',#2863,.T.);
#1992=FACE_OUTER_BOUND('',#2864,.T.);
#1993=FACE_OUTER_BOUND('',#2865,.T.);
#1994=FACE_OUTER_BOUND('',#2866,.T.);
#1995=FACE_OUTER_BOUND('',#2867,.T.);
#1996=FACE_OUTER_BOUND('',#2868,.T.);
#1997=FACE_OUTER_BOUND('',#2869,.T.);
#1998=FACE_OUTER_BOUND('',#2870,.T.);
#1999=FACE_OUTER_BOUND('',#2871,.T.);
#2000=FACE_OUTER_BOUND('',#2872,.T.);
#2001=FACE_OUTER_BOUND('',#2873,.T.);
#2002=FACE_OUTER_BOUND('',#2874,.T.);
#2003=FACE_OUTER_BOUND('',#2875,.T.);
#2004=FACE_OUTER_BOUND('',#2876,.T.);
#2005=FACE_OUTER_BOUND('',#2877,.T.);
#2006=FACE_OUTER_BOUND('',#2878,.T.);
#2007=FACE_OUTER_BOUND('',#2879,.T.);
#2008=FACE_OUTER_BOUND('',#2880,.T.);
#2009=FACE_OUTER_BOUND('',#2881,.T.);
#2010=FACE_OUTER_BOUND('',#2882,.T.);
#2011=FACE_OUTER_BOUND('',#2883,.T.);
#2012=FACE_OUTER_BOUND('',#2884,.T.);
#2013=FACE_OUTER_BOUND('',#2885,.T.);
#2014=FACE_OUTER_BOUND('',#2886,.T.);
#2015=FACE_OUTER_BOUND('',#2887,.T.);
#2016=FACE_OUTER_BOUND('',#2888,.T.);
#2017=FACE_OUTER_BOUND('',#2889,.T.);
#2018=FACE_OUTER_BOUND('',#2890,.T.);
#2019=FACE_OUTER_BOUND('',#2891,.T.);
#2020=FACE_OUTER_BOUND('',#2892,.T.);
#2021=FACE_OUTER_BOUND('',#2893,.T.);
#2022=FACE_OUTER_BOUND('',#2894,.T.);
#2023=FACE_OUTER_BOUND('',#2895,.T.);
#2024=FACE_OUTER_BOUND('',#2896,.T.);
#2025=FACE_OUTER_BOUND('',#2897,.T.);
#2026=FACE_OUTER_BOUND('',#2898,.T.);
#2027=FACE_OUTER_BOUND('',#2899,.T.);
#2028=FACE_OUTER_BOUND('',#2900,.T.);
#2029=FACE_OUTER_BOUND('',#2901,.T.);
#2030=FACE_OUTER_BOUND('',#2902,.T.);
#2031=FACE_OUTER_BOUND('',#2903,.T.);
#2032=FACE_OUTER_BOUND('',#2904,.T.);
#2033=FACE_OUTER_BOUND('',#2905,.T.);
#2034=FACE_OUTER_BOUND('',#2906,.T.);
#2035=FACE_OUTER_BOUND('',#2907,.T.);
#2036=FACE_OUTER_BOUND('',#2908,.T.);
#2037=FACE_OUTER_BOUND('',#2909,.T.);
#2038=FACE_OUTER_BOUND('',#2910,.T.);
#2039=FACE_OUTER_BOUND('',#2911,.T.);
#2040=FACE_OUTER_BOUND('',#2912,.T.);
#2041=FACE_OUTER_BOUND('',#2913,.T.);
#2042=FACE_OUTER_BOUND('',#2914,.T.);
#2043=FACE_OUTER_BOUND('',#2915,.T.);
#2044=FACE_OUTER_BOUND('',#2916,.T.);
#2045=FACE_OUTER_BOUND('',#2917,.T.);
#2046=FACE_OUTER_BOUND('',#2918,.T.);
#2047=FACE_OUTER_BOUND('',#2919,.T.);
#2048=FACE_OUTER_BOUND('',#2920,.T.);
#2049=FACE_OUTER_BOUND('',#2921,.T.);
#2050=FACE_OUTER_BOUND('',#2922,.T.);
#2051=FACE_OUTER_BOUND('',#2923,.T.);
#2052=FACE_OUTER_BOUND('',#2924,.T.);
#2053=FACE_OUTER_BOUND('',#2925,.T.);
#2054=FACE_OUTER_BOUND('',#2926,.T.);
#2055=FACE_OUTER_BOUND('',#2927,.T.);
#2056=FACE_OUTER_BOUND('',#2928,.T.);
#2057=FACE_OUTER_BOUND('',#2929,.T.);
#2058=FACE_OUTER_BOUND('',#2930,.T.);
#2059=FACE_OUTER_BOUND('',#2931,.T.);
#2060=FACE_OUTER_BOUND('',#2932,.T.);
#2061=FACE_OUTER_BOUND('',#2933,.T.);
#2062=FACE_OUTER_BOUND('',#2934,.T.);
#2063=FACE_OUTER_BOUND('',#2935,.T.);
#2064=FACE_OUTER_BOUND('',#2936,.T.);
#2065=FACE_OUTER_BOUND('',#2937,.T.);
#2066=FACE_OUTER_BOUND('',#2938,.T.);
#2067=FACE_OUTER_BOUND('',#2939,.T.);
#2068=FACE_OUTER_BOUND('',#2940,.T.);
#2069=FACE_OUTER_BOUND('',#2941,.T.);
#2070=FACE_OUTER_BOUND('',#2942,.T.);
#2071=FACE_OUTER_BOUND('',#2943,.T.);
#2072=FACE_OUTER_BOUND('',#2944,.T.);
#2073=FACE_OUTER_BOUND('',#2945,.T.);
#2074=FACE_OUTER_BOUND('',#2946,.T.);
#2075=FACE_OUTER_BOUND('',#2947,.T.);
#2076=FACE_OUTER_BOUND('',#2948,.T.);
#2077=FACE_OUTER_BOUND('',#2949,.T.);
#2078=FACE_OUTER_BOUND('',#2950,.T.);
#2079=FACE_OUTER_BOUND('',#2951,.T.);
#2080=FACE_OUTER_BOUND('',#2952,.T.);
#2081=FACE_OUTER_BOUND('',#2953,.T.);
#2082=FACE_OUTER_BOUND('',#2954,.T.);
#2083=FACE_OUTER_BOUND('',#2955,.T.);
#2084=FACE_OUTER_BOUND('',#2956,.T.);
#2085=FACE_OUTER_BOUND('',#2957,.T.);
#2086=FACE_OUTER_BOUND('',#2958,.T.);
#2087=FACE_OUTER_BOUND('',#2959,.T.);
#2088=EDGE_LOOP('',(#8601,#8602,#8603,#8604,#8605));
#2089=EDGE_LOOP('',(#8606,#8607,#8608,#8609,#8610,#8611,#8612,#8613));
#2090=EDGE_LOOP('',(#8614));
#2091=EDGE_LOOP('',(#8615));
#2092=EDGE_LOOP('',(#8616,#8617,#8618,#8619));
#2093=EDGE_LOOP('',(#8620,#8621,#8622,#8623));
#2094=EDGE_LOOP('',(#8624,#8625,#8626,#8627));
#2095=EDGE_LOOP('',(#8628,#8629,#8630,#8631,#8632,#8633,#8634,#8635,#8636,
#8637,#8638,#8639));
#2096=EDGE_LOOP('',(#8640,#8641,#8642,#8643,#8644,#8645,#8646,#8647,#8648,
#8649,#8650,#8651));
#2097=EDGE_LOOP('',(#8652,#8653,#8654,#8655));
#2098=EDGE_LOOP('',(#8656,#8657,#8658,#8659));
#2099=EDGE_LOOP('',(#8660,#8661,#8662,#8663,#8664,#8665,#8666,#8667,#8668,
#8669,#8670,#8671));
#2100=EDGE_LOOP('',(#8672,#8673,#8674,#8675,#8676,#8677,#8678,#8679,#8680,
#8681,#8682,#8683));
#2101=EDGE_LOOP('',(#8684,#8685,#8686,#8687));
#2102=EDGE_LOOP('',(#8688,#8689,#8690,#8691,#8692));
#2103=EDGE_LOOP('',(#8693,#8694,#8695,#8696,#8697,#8698,#8699,#8700,#8701,
#8702));
#2104=EDGE_LOOP('',(#8703,#8704,#8705,#8706));
#2105=EDGE_LOOP('',(#8707,#8708,#8709,#8710,#8711,#8712,#8713,#8714,#8715));
#2106=EDGE_LOOP('',(#8716,#8717,#8718,#8719));
#2107=EDGE_LOOP('',(#8720,#8721,#8722,#8723,#8724,#8725,#8726,#8727,#8728,
#8729,#8730,#8731));
#2108=EDGE_LOOP('',(#8732,#8733,#8734,#8735,#8736,#8737,#8738,#8739,#8740,
#8741,#8742,#8743));
#2109=EDGE_LOOP('',(#8744,#8745,#8746,#8747,#8748,#8749,#8750,#8751,#8752,
#8753,#8754));
#2110=EDGE_LOOP('',(#8755,#8756,#8757,#8758,#8759,#8760,#8761,#8762,#8763,
#8764));
#2111=EDGE_LOOP('',(#8765,#8766,#8767,#8768,#8769));
#2112=EDGE_LOOP('',(#8770,#8771,#8772));
#2113=EDGE_LOOP('',(#8773,#8774,#8775));
#2114=EDGE_LOOP('',(#8776,#8777,#8778,#8779));
#2115=EDGE_LOOP('',(#8780,#8781,#8782,#8783));
#2116=EDGE_LOOP('',(#8784,#8785,#8786,#8787));
#2117=EDGE_LOOP('',(#8788,#8789,#8790,#8791));
#2118=EDGE_LOOP('',(#8792,#8793,#8794,#8795));
#2119=EDGE_LOOP('',(#8796,#8797,#8798,#8799,#8800,#8801,#8802,#8803));
#2120=EDGE_LOOP('',(#8804,#8805,#8806,#8807,#8808));
#2121=EDGE_LOOP('',(#8809,#8810,#8811,#8812,#8813,#8814,#8815,#8816,#8817));
#2122=EDGE_LOOP('',(#8818,#8819,#8820,#8821));
#2123=EDGE_LOOP('',(#8822,#8823,#8824,#8825));
#2124=EDGE_LOOP('',(#8826));
#2125=EDGE_LOOP('',(#8827,#8828,#8829));
#2126=EDGE_LOOP('',(#8830,#8831,#8832));
#2127=EDGE_LOOP('',(#8833,#8834,#8835,#8836));
#2128=EDGE_LOOP('',(#8837,#8838,#8839,#8840));
#2129=EDGE_LOOP('',(#8841,#8842,#8843,#8844));
#2130=EDGE_LOOP('',(#8845,#8846,#8847,#8848));
#2131=EDGE_LOOP('',(#8849,#8850,#8851,#8852));
#2132=EDGE_LOOP('',(#8853,#8854,#8855,#8856));
#2133=EDGE_LOOP('',(#8857,#8858,#8859,#8860));
#2134=EDGE_LOOP('',(#8861,#8862,#8863,#8864,#8865,#8866));
#2135=EDGE_LOOP('',(#8867,#8868,#8869,#8870));
#2136=EDGE_LOOP('',(#8871,#8872,#8873,#8874));
#2137=EDGE_LOOP('',(#8875,#8876,#8877,#8878));
#2138=EDGE_LOOP('',(#8879,#8880,#8881,#8882,#8883,#8884));
#2139=EDGE_LOOP('',(#8885,#8886,#8887,#8888));
#2140=EDGE_LOOP('',(#8889,#8890,#8891,#8892,#8893,#8894));
#2141=EDGE_LOOP('',(#8895,#8896,#8897,#8898,#8899,#8900));
#2142=EDGE_LOOP('',(#8901,#8902,#8903,#8904,#8905,#8906));
#2143=EDGE_LOOP('',(#8907,#8908,#8909,#8910,#8911,#8912));
#2144=EDGE_LOOP('',(#8913,#8914,#8915,#8916,#8917,#8918,#8919));
#2145=EDGE_LOOP('',(#8920,#8921,#8922,#8923,#8924,#8925,#8926,#8927,#8928,
#8929,#8930,#8931,#8932));
#2146=EDGE_LOOP('',(#8933,#8934,#8935,#8936));
#2147=EDGE_LOOP('',(#8937,#8938,#8939,#8940,#8941));
#2148=EDGE_LOOP('',(#8942,#8943,#8944,#8945));
#2149=EDGE_LOOP('',(#8946,#8947,#8948,#8949));
#2150=EDGE_LOOP('',(#8950,#8951,#8952,#8953));
#2151=EDGE_LOOP('',(#8954,#8955,#8956,#8957));
#2152=EDGE_LOOP('',(#8958,#8959,#8960,#8961));
#2153=EDGE_LOOP('',(#8962,#8963,#8964,#8965));
#2154=EDGE_LOOP('',(#8966,#8967,#8968,#8969));
#2155=EDGE_LOOP('',(#8970,#8971,#8972,#8973));
#2156=EDGE_LOOP('',(#8974,#8975,#8976,#8977));
#2157=EDGE_LOOP('',(#8978,#8979,#8980,#8981));
#2158=EDGE_LOOP('',(#8982,#8983,#8984,#8985));
#2159=EDGE_LOOP('',(#8986,#8987,#8988,#8989));
#2160=EDGE_LOOP('',(#8990,#8991,#8992,#8993));
#2161=EDGE_LOOP('',(#8994,#8995,#8996,#8997));
#2162=EDGE_LOOP('',(#8998,#8999,#9000,#9001));
#2163=EDGE_LOOP('',(#9002,#9003,#9004,#9005));
#2164=EDGE_LOOP('',(#9006,#9007,#9008,#9009));
#2165=EDGE_LOOP('',(#9010,#9011,#9012,#9013));
#2166=EDGE_LOOP('',(#9014,#9015,#9016,#9017));
#2167=EDGE_LOOP('',(#9018,#9019,#9020,#9021));
#2168=EDGE_LOOP('',(#9022,#9023,#9024,#9025));
#2169=EDGE_LOOP('',(#9026,#9027,#9028,#9029));
#2170=EDGE_LOOP('',(#9030,#9031,#9032,#9033));
#2171=EDGE_LOOP('',(#9034,#9035,#9036,#9037));
#2172=EDGE_LOOP('',(#9038,#9039,#9040,#9041));
#2173=EDGE_LOOP('',(#9042,#9043,#9044,#9045));
#2174=EDGE_LOOP('',(#9046,#9047,#9048,#9049,#9050,#9051,#9052));
#2175=EDGE_LOOP('',(#9053,#9054,#9055,#9056,#9057,#9058));
#2176=EDGE_LOOP('',(#9059,#9060,#9061,#9062));
#2177=EDGE_LOOP('',(#9063,#9064,#9065,#9066));
#2178=EDGE_LOOP('',(#9067,#9068,#9069,#9070));
#2179=EDGE_LOOP('',(#9071,#9072,#9073,#9074,#9075));
#2180=EDGE_LOOP('',(#9076,#9077,#9078));
#2181=EDGE_LOOP('',(#9079,#9080,#9081,#9082,#9083));
#2182=EDGE_LOOP('',(#9084,#9085,#9086,#9087));
#2183=EDGE_LOOP('',(#9088,#9089,#9090,#9091,#9092));
#2184=EDGE_LOOP('',(#9093,#9094,#9095,#9096,#9097,#9098,#9099));
#2185=EDGE_LOOP('',(#9100,#9101,#9102,#9103,#9104,#9105,#9106,#9107));
#2186=EDGE_LOOP('',(#9108,#9109,#9110,#9111,#9112,#9113,#9114,#9115));
#2187=EDGE_LOOP('',(#9116,#9117,#9118,#9119,#9120,#9121));
#2188=EDGE_LOOP('',(#9122,#9123,#9124,#9125,#9126));
#2189=EDGE_LOOP('',(#9127,#9128,#9129,#9130));
#2190=EDGE_LOOP('',(#9131,#9132,#9133,#9134));
#2191=EDGE_LOOP('',(#9135,#9136,#9137,#9138));
#2192=EDGE_LOOP('',(#9139,#9140,#9141,#9142));
#2193=EDGE_LOOP('',(#9143,#9144,#9145,#9146));
#2194=EDGE_LOOP('',(#9147,#9148,#9149,#9150));
#2195=EDGE_LOOP('',(#9151,#9152,#9153,#9154));
#2196=EDGE_LOOP('',(#9155,#9156,#9157,#9158));
#2197=EDGE_LOOP('',(#9159,#9160,#9161,#9162));
#2198=EDGE_LOOP('',(#9163,#9164,#9165,#9166));
#2199=EDGE_LOOP('',(#9167,#9168,#9169,#9170));
#2200=EDGE_LOOP('',(#9171,#9172,#9173,#9174));
#2201=EDGE_LOOP('',(#9175,#9176,#9177,#9178));
#2202=EDGE_LOOP('',(#9179,#9180,#9181,#9182));
#2203=EDGE_LOOP('',(#9183,#9184,#9185,#9186));
#2204=EDGE_LOOP('',(#9187,#9188,#9189,#9190));
#2205=EDGE_LOOP('',(#9191,#9192,#9193,#9194));
#2206=EDGE_LOOP('',(#9195,#9196,#9197,#9198));
#2207=EDGE_LOOP('',(#9199,#9200,#9201,#9202));
#2208=EDGE_LOOP('',(#9203,#9204,#9205,#9206,#9207,#9208,#9209,#9210));
#2209=EDGE_LOOP('',(#9211,#9212,#9213,#9214,#9215,#9216,#9217,#9218));
#2210=EDGE_LOOP('',(#9219,#9220,#9221,#9222));
#2211=EDGE_LOOP('',(#9223,#9224,#9225,#9226));
#2212=EDGE_LOOP('',(#9227,#9228,#9229,#9230));
#2213=EDGE_LOOP('',(#9231,#9232,#9233,#9234));
#2214=EDGE_LOOP('',(#9235,#9236,#9237,#9238));
#2215=EDGE_LOOP('',(#9239,#9240,#9241,#9242));
#2216=EDGE_LOOP('',(#9243,#9244,#9245,#9246));
#2217=EDGE_LOOP('',(#9247,#9248,#9249,#9250));
#2218=EDGE_LOOP('',(#9251,#9252,#9253,#9254));
#2219=EDGE_LOOP('',(#9255,#9256,#9257,#9258));
#2220=EDGE_LOOP('',(#9259,#9260,#9261,#9262));
#2221=EDGE_LOOP('',(#9263,#9264,#9265,#9266));
#2222=EDGE_LOOP('',(#9267,#9268,#9269,#9270));
#2223=EDGE_LOOP('',(#9271,#9272,#9273,#9274));
#2224=EDGE_LOOP('',(#9275,#9276,#9277,#9278));
#2225=EDGE_LOOP('',(#9279,#9280,#9281,#9282));
#2226=EDGE_LOOP('',(#9283,#9284,#9285,#9286));
#2227=EDGE_LOOP('',(#9287,#9288,#9289,#9290));
#2228=EDGE_LOOP('',(#9291,#9292,#9293,#9294));
#2229=EDGE_LOOP('',(#9295,#9296,#9297,#9298));
#2230=EDGE_LOOP('',(#9299,#9300,#9301,#9302));
#2231=EDGE_LOOP('',(#9303,#9304,#9305,#9306));
#2232=EDGE_LOOP('',(#9307,#9308,#9309,#9310));
#2233=EDGE_LOOP('',(#9311,#9312,#9313,#9314));
#2234=EDGE_LOOP('',(#9315,#9316,#9317,#9318));
#2235=EDGE_LOOP('',(#9319,#9320,#9321,#9322,#9323,#9324,#9325,#9326,#9327,
#9328,#9329,#9330,#9331,#9332,#9333,#9334,#9335,#9336,#9337,#9338,#9339,
#9340,#9341,#9342,#9343,#9344,#9345,#9346,#9347,#9348,#9349,#9350));
#2236=EDGE_LOOP('',(#9351,#9352,#9353,#9354,#9355,#9356,#9357,#9358));
#2237=EDGE_LOOP('',(#9359,#9360,#9361,#9362,#9363,#9364,#9365,#9366));
#2238=EDGE_LOOP('',(#9367,#9368,#9369,#9370));
#2239=EDGE_LOOP('',(#9371,#9372,#9373,#9374,#9375,#9376,#9377,#9378,#9379,
#9380,#9381,#9382));
#2240=EDGE_LOOP('',(#9383,#9384,#9385,#9386,#9387,#9388,#9389,#9390));
#2241=EDGE_LOOP('',(#9391,#9392,#9393,#9394));
#2242=EDGE_LOOP('',(#9395,#9396,#9397,#9398,#9399,#9400));
#2243=EDGE_LOOP('',(#9401,#9402,#9403,#9404,#9405));
#2244=EDGE_LOOP('',(#9406,#9407,#9408,#9409,#9410,#9411));
#2245=EDGE_LOOP('',(#9412,#9413,#9414,#9415,#9416));
#2246=EDGE_LOOP('',(#9417,#9418,#9419,#9420));
#2247=EDGE_LOOP('',(#9421,#9422,#9423,#9424));
#2248=EDGE_LOOP('',(#9425,#9426,#9427,#9428));
#2249=EDGE_LOOP('',(#9429,#9430,#9431,#9432,#9433,#9434,#9435,#9436,#9437,
#9438,#9439,#9440,#9441,#9442,#9443,#9444,#9445,#9446));
#2250=EDGE_LOOP('',(#9447,#9448,#9449,#9450));
#2251=EDGE_LOOP('',(#9451,#9452,#9453,#9454));
#2252=EDGE_LOOP('',(#9455,#9456,#9457,#9458));
#2253=EDGE_LOOP('',(#9459,#9460,#9461,#9462,#9463));
#2254=EDGE_LOOP('',(#9464,#9465,#9466,#9467));
#2255=EDGE_LOOP('',(#9468,#9469,#9470,#9471));
#2256=EDGE_LOOP('',(#9472,#9473,#9474,#9475));
#2257=EDGE_LOOP('',(#9476,#9477,#9478,#9479));
#2258=EDGE_LOOP('',(#9480,#9481,#9482,#9483));
#2259=EDGE_LOOP('',(#9484,#9485,#9486,#9487));
#2260=EDGE_LOOP('',(#9488,#9489,#9490,#9491));
#2261=EDGE_LOOP('',(#9492,#9493,#9494,#9495,#9496,#9497,#9498,#9499,#9500));
#2262=EDGE_LOOP('',(#9501,#9502,#9503,#9504,#9505,#9506));
#2263=EDGE_LOOP('',(#9507,#9508,#9509,#9510,#9511,#9512,#9513,#9514,#9515));
#2264=EDGE_LOOP('',(#9516,#9517,#9518,#9519,#9520));
#2265=EDGE_LOOP('',(#9521,#9522,#9523,#9524,#9525,#9526,#9527,#9528,#9529));
#2266=EDGE_LOOP('',(#9530,#9531,#9532,#9533,#9534,#9535,#9536,#9537,#9538));
#2267=EDGE_LOOP('',(#9539,#9540,#9541));
#2268=EDGE_LOOP('',(#9542,#9543,#9544,#9545));
#2269=EDGE_LOOP('',(#9546,#9547,#9548));
#2270=EDGE_LOOP('',(#9549,#9550,#9551));
#2271=EDGE_LOOP('',(#9552,#9553,#9554,#9555));
#2272=EDGE_LOOP('',(#9556,#9557,#9558));
#2273=EDGE_LOOP('',(#9559,#9560,#9561,#9562));
#2274=EDGE_LOOP('',(#9563,#9564,#9565,#9566,#9567));
#2275=EDGE_LOOP('',(#9568,#9569,#9570,#9571,#9572));
#2276=EDGE_LOOP('',(#9573,#9574,#9575,#9576,#9577));
#2277=EDGE_LOOP('',(#9578,#9579,#9580,#9581));
#2278=EDGE_LOOP('',(#9582,#9583,#9584,#9585));
#2279=EDGE_LOOP('',(#9586,#9587,#9588,#9589));
#2280=EDGE_LOOP('',(#9590,#9591,#9592,#9593));
#2281=EDGE_LOOP('',(#9594,#9595,#9596,#9597,#9598));
#2282=EDGE_LOOP('',(#9599,#9600,#9601,#9602));
#2283=EDGE_LOOP('',(#9603,#9604,#9605));
#2284=EDGE_LOOP('',(#9606,#9607,#9608,#9609));
#2285=EDGE_LOOP('',(#9610,#9611,#9612,#9613));
#2286=EDGE_LOOP('',(#9614,#9615,#9616,#9617));
#2287=EDGE_LOOP('',(#9618,#9619,#9620,#9621));
#2288=EDGE_LOOP('',(#9622,#9623,#9624,#9625));
#2289=EDGE_LOOP('',(#9626,#9627,#9628,#9629,#9630));
#2290=EDGE_LOOP('',(#9631,#9632,#9633,#9634));
#2291=EDGE_LOOP('',(#9635,#9636,#9637));
#2292=EDGE_LOOP('',(#9638,#9639,#9640,#9641));
#2293=EDGE_LOOP('',(#9642,#9643,#9644,#9645));
#2294=EDGE_LOOP('',(#9646,#9647,#9648,#9649));
#2295=EDGE_LOOP('',(#9650,#9651,#9652,#9653));
#2296=EDGE_LOOP('',(#9654,#9655,#9656,#9657,#9658,#9659));
#2297=EDGE_LOOP('',(#9660,#9661,#9662,#9663,#9664,#9665));
#2298=EDGE_LOOP('',(#9666,#9667,#9668,#9669));
#2299=EDGE_LOOP('',(#9670,#9671,#9672,#9673));
#2300=EDGE_LOOP('',(#9674,#9675,#9676,#9677));
#2301=EDGE_LOOP('',(#9678,#9679,#9680,#9681));
#2302=EDGE_LOOP('',(#9682,#9683,#9684,#9685));
#2303=EDGE_LOOP('',(#9686,#9687,#9688,#9689,#9690));
#2304=EDGE_LOOP('',(#9691,#9692,#9693,#9694));
#2305=EDGE_LOOP('',(#9695,#9696,#9697));
#2306=EDGE_LOOP('',(#9698,#9699,#9700,#9701));
#2307=EDGE_LOOP('',(#9702,#9703,#9704,#9705));
#2308=EDGE_LOOP('',(#9706,#9707,#9708,#9709));
#2309=EDGE_LOOP('',(#9710,#9711,#9712,#9713,#9714));
#2310=EDGE_LOOP('',(#9715,#9716,#9717,#9718));
#2311=EDGE_LOOP('',(#9719,#9720,#9721,#9722));
#2312=EDGE_LOOP('',(#9723,#9724,#9725,#9726));
#2313=EDGE_LOOP('',(#9727,#9728,#9729));
#2314=EDGE_LOOP('',(#9730,#9731,#9732,#9733));
#2315=EDGE_LOOP('',(#9734,#9735,#9736,#9737));
#2316=EDGE_LOOP('',(#9738,#9739,#9740,#9741));
#2317=EDGE_LOOP('',(#9742,#9743,#9744,#9745));
#2318=EDGE_LOOP('',(#9746,#9747,#9748,#9749));
#2319=EDGE_LOOP('',(#9750,#9751,#9752,#9753));
#2320=EDGE_LOOP('',(#9754,#9755,#9756,#9757,#9758,#9759));
#2321=EDGE_LOOP('',(#9760,#9761,#9762,#9763,#9764,#9765));
#2322=EDGE_LOOP('',(#9766,#9767,#9768,#9769,#9770,#9771));
#2323=EDGE_LOOP('',(#9772,#9773,#9774,#9775,#9776,#9777));
#2324=EDGE_LOOP('',(#9778,#9779,#9780,#9781,#9782,#9783));
#2325=EDGE_LOOP('',(#9784,#9785,#9786,#9787,#9788,#9789));
#2326=EDGE_LOOP('',(#9790,#9791,#9792,#9793));
#2327=EDGE_LOOP('',(#9794,#9795,#9796,#9797));
#2328=EDGE_LOOP('',(#9798,#9799,#9800,#9801,#9802,#9803));
#2329=EDGE_LOOP('',(#9804,#9805,#9806,#9807));
#2330=EDGE_LOOP('',(#9808,#9809,#9810,#9811));
#2331=EDGE_LOOP('',(#9812,#9813,#9814,#9815,#9816,#9817));
#2332=EDGE_LOOP('',(#9818,#9819,#9820,#9821));
#2333=EDGE_LOOP('',(#9822,#9823,#9824,#9825));
#2334=EDGE_LOOP('',(#9826,#9827,#9828,#9829,#9830,#9831,#9832,#9833));
#2335=EDGE_LOOP('',(#9834,#9835,#9836,#9837,#9838,#9839,#9840,#9841,#9842,
#9843,#9844,#9845));
#2336=EDGE_LOOP('',(#9846,#9847,#9848,#9849));
#2337=EDGE_LOOP('',(#9850,#9851,#9852,#9853));
#2338=EDGE_LOOP('',(#9854,#9855,#9856,#9857));
#2339=EDGE_LOOP('',(#9858,#9859,#9860,#9861));
#2340=EDGE_LOOP('',(#9862,#9863,#9864,#9865));
#2341=EDGE_LOOP('',(#9866,#9867,#9868,#9869));
#2342=EDGE_LOOP('',(#9870,#9871,#9872,#9873));
#2343=EDGE_LOOP('',(#9874,#9875,#9876,#9877));
#2344=EDGE_LOOP('',(#9878,#9879,#9880,#9881));
#2345=EDGE_LOOP('',(#9882,#9883,#9884,#9885));
#2346=EDGE_LOOP('',(#9886,#9887,#9888,#9889));
#2347=EDGE_LOOP('',(#9890,#9891,#9892,#9893));
#2348=EDGE_LOOP('',(#9894,#9895,#9896,#9897));
#2349=EDGE_LOOP('',(#9898,#9899,#9900,#9901));
#2350=EDGE_LOOP('',(#9902,#9903,#9904,#9905));
#2351=EDGE_LOOP('',(#9906,#9907,#9908));
#2352=EDGE_LOOP('',(#9909,#9910,#9911,#9912));
#2353=EDGE_LOOP('',(#9913,#9914,#9915,#9916));
#2354=EDGE_LOOP('',(#9917,#9918,#9919,#9920,#9921,#9922));
#2355=EDGE_LOOP('',(#9923,#9924,#9925,#9926));
#2356=EDGE_LOOP('',(#9927,#9928,#9929,#9930));
#2357=EDGE_LOOP('',(#9931,#9932,#9933));
#2358=EDGE_LOOP('',(#9934,#9935,#9936,#9937));
#2359=EDGE_LOOP('',(#9938,#9939,#9940,#9941));
#2360=EDGE_LOOP('',(#9942,#9943,#9944));
#2361=EDGE_LOOP('',(#9945,#9946,#9947,#9948,#9949,#9950));
#2362=EDGE_LOOP('',(#9951,#9952,#9953,#9954));
#2363=EDGE_LOOP('',(#9955,#9956,#9957));
#2364=EDGE_LOOP('',(#9958,#9959,#9960,#9961,#9962,#9963,#9964,#9965,#9966,
#9967,#9968,#9969,#9970,#9971,#9972,#9973,#9974,#9975,#9976,#9977));
#2365=EDGE_LOOP('',(#9978,#9979,#9980,#9981,#9982));
#2366=EDGE_LOOP('',(#9983,#9984,#9985,#9986));
#2367=EDGE_LOOP('',(#9987,#9988,#9989,#9990,#9991));
#2368=EDGE_LOOP('',(#9992,#9993,#9994,#9995));
#2369=EDGE_LOOP('',(#9996,#9997,#9998,#9999,#10000));
#2370=EDGE_LOOP('',(#10001,#10002,#10003,#10004));
#2371=EDGE_LOOP('',(#10005,#10006,#10007,#10008));
#2372=EDGE_LOOP('',(#10009,#10010,#10011,#10012,#10013));
#2373=EDGE_LOOP('',(#10014,#10015,#10016,#10017,#10018));
#2374=EDGE_LOOP('',(#10019,#10020,#10021,#10022));
#2375=EDGE_LOOP('',(#10023,#10024,#10025,#10026,#10027));
#2376=EDGE_LOOP('',(#10028,#10029,#10030,#10031,#10032,#10033));
#2377=EDGE_LOOP('',(#10034,#10035,#10036,#10037));
#2378=EDGE_LOOP('',(#10038,#10039,#10040,#10041,#10042));
#2379=EDGE_LOOP('',(#10043,#10044,#10045,#10046,#10047));
#2380=EDGE_LOOP('',(#10048,#10049,#10050,#10051));
#2381=EDGE_LOOP('',(#10052,#10053,#10054,#10055,#10056));
#2382=EDGE_LOOP('',(#10057,#10058,#10059,#10060,#10061));
#2383=EDGE_LOOP('',(#10062,#10063,#10064,#10065));
#2384=EDGE_LOOP('',(#10066,#10067,#10068,#10069));
#2385=EDGE_LOOP('',(#10070,#10071,#10072,#10073));
#2386=EDGE_LOOP('',(#10074,#10075,#10076,#10077,#10078,#10079,#10080));
#2387=EDGE_LOOP('',(#10081,#10082,#10083,#10084));
#2388=EDGE_LOOP('',(#10085,#10086,#10087,#10088));
#2389=EDGE_LOOP('',(#10089,#10090,#10091,#10092,#10093));
#2390=EDGE_LOOP('',(#10094,#10095,#10096,#10097));
#2391=EDGE_LOOP('',(#10098,#10099,#10100,#10101));
#2392=EDGE_LOOP('',(#10102,#10103,#10104,#10105));
#2393=EDGE_LOOP('',(#10106,#10107,#10108));
#2394=EDGE_LOOP('',(#10109,#10110,#10111));
#2395=EDGE_LOOP('',(#10112,#10113,#10114,#10115));
#2396=EDGE_LOOP('',(#10116,#10117,#10118,#10119,#10120,#10121,#10122));
#2397=EDGE_LOOP('',(#10123,#10124,#10125,#10126));
#2398=EDGE_LOOP('',(#10127,#10128,#10129,#10130));
#2399=EDGE_LOOP('',(#10131,#10132,#10133,#10134));
#2400=EDGE_LOOP('',(#10135,#10136,#10137,#10138,#10139));
#2401=EDGE_LOOP('',(#10140,#10141,#10142));
#2402=EDGE_LOOP('',(#10143,#10144,#10145));
#2403=EDGE_LOOP('',(#10146,#10147,#10148,#10149,#10150,#10151,#10152,#10153));
#2404=EDGE_LOOP('',(#10154,#10155,#10156,#10157,#10158,#10159,#10160,#10161,
#10162,#10163,#10164,#10165,#10166,#10167,#10168,#10169,#10170,#10171,#10172,
#10173));
#2405=EDGE_LOOP('',(#10174,#10175,#10176,#10177));
#2406=EDGE_LOOP('',(#10178,#10179,#10180,#10181));
#2407=EDGE_LOOP('',(#10182,#10183,#10184,#10185));
#2408=EDGE_LOOP('',(#10186,#10187,#10188,#10189));
#2409=EDGE_LOOP('',(#10190,#10191,#10192,#10193));
#2410=EDGE_LOOP('',(#10194,#10195,#10196,#10197));
#2411=EDGE_LOOP('',(#10198,#10199,#10200,#10201));
#2412=EDGE_LOOP('',(#10202,#10203,#10204,#10205));
#2413=EDGE_LOOP('',(#10206,#10207,#10208,#10209));
#2414=EDGE_LOOP('',(#10210,#10211,#10212,#10213,#10214,#10215));
#2415=EDGE_LOOP('',(#10216,#10217,#10218,#10219));
#2416=EDGE_LOOP('',(#10220,#10221,#10222,#10223));
#2417=EDGE_LOOP('',(#10224,#10225,#10226,#10227,#10228,#10229));
#2418=EDGE_LOOP('',(#10230,#10231,#10232,#10233,#10234));
#2419=EDGE_LOOP('',(#10235,#10236,#10237,#10238,#10239));
#2420=EDGE_LOOP('',(#10240,#10241,#10242,#10243,#10244,#10245));
#2421=EDGE_LOOP('',(#10246,#10247,#10248,#10249));
#2422=EDGE_LOOP('',(#10250,#10251,#10252,#10253));
#2423=EDGE_LOOP('',(#10254,#10255,#10256,#10257));
#2424=EDGE_LOOP('',(#10258,#10259,#10260,#10261,#10262,#10263));
#2425=EDGE_LOOP('',(#10264,#10265,#10266,#10267,#10268,#10269));
#2426=EDGE_LOOP('',(#10270,#10271,#10272,#10273,#10274,#10275));
#2427=EDGE_LOOP('',(#10276,#10277,#10278,#10279,#10280,#10281));
#2428=EDGE_LOOP('',(#10282,#10283,#10284,#10285,#10286,#10287));
#2429=EDGE_LOOP('',(#10288,#10289,#10290,#10291,#10292,#10293));
#2430=EDGE_LOOP('',(#10294,#10295,#10296,#10297));
#2431=EDGE_LOOP('',(#10298,#10299,#10300,#10301));
#2432=EDGE_LOOP('',(#10302,#10303,#10304,#10305,#10306,#10307));
#2433=EDGE_LOOP('',(#10308,#10309,#10310,#10311));
#2434=EDGE_LOOP('',(#10312,#10313,#10314,#10315));
#2435=EDGE_LOOP('',(#10316,#10317,#10318,#10319,#10320,#10321));
#2436=EDGE_LOOP('',(#10322,#10323,#10324,#10325));
#2437=EDGE_LOOP('',(#10326,#10327,#10328,#10329));
#2438=EDGE_LOOP('',(#10330,#10331,#10332,#10333,#10334,#10335,#10336,#10337,
#10338,#10339,#10340,#10341));
#2439=EDGE_LOOP('',(#10342,#10343,#10344,#10345));
#2440=EDGE_LOOP('',(#10346,#10347,#10348,#10349));
#2441=EDGE_LOOP('',(#10350,#10351,#10352,#10353));
#2442=EDGE_LOOP('',(#10354,#10355,#10356,#10357));
#2443=EDGE_LOOP('',(#10358,#10359,#10360,#10361));
#2444=EDGE_LOOP('',(#10362,#10363,#10364,#10365));
#2445=EDGE_LOOP('',(#10366,#10367,#10368,#10369));
#2446=EDGE_LOOP('',(#10370,#10371,#10372,#10373));
#2447=EDGE_LOOP('',(#10374,#10375,#10376,#10377));
#2448=EDGE_LOOP('',(#10378,#10379,#10380,#10381));
#2449=EDGE_LOOP('',(#10382,#10383,#10384,#10385));
#2450=EDGE_LOOP('',(#10386,#10387,#10388,#10389));
#2451=EDGE_LOOP('',(#10390,#10391,#10392,#10393));
#2452=EDGE_LOOP('',(#10394,#10395,#10396,#10397));
#2453=EDGE_LOOP('',(#10398,#10399,#10400));
#2454=EDGE_LOOP('',(#10401,#10402,#10403,#10404));
#2455=EDGE_LOOP('',(#10405,#10406,#10407,#10408));
#2456=EDGE_LOOP('',(#10409,#10410,#10411,#10412,#10413,#10414));
#2457=EDGE_LOOP('',(#10415,#10416,#10417,#10418));
#2458=EDGE_LOOP('',(#10419,#10420,#10421,#10422));
#2459=EDGE_LOOP('',(#10423,#10424,#10425));
#2460=EDGE_LOOP('',(#10426,#10427,#10428,#10429));
#2461=EDGE_LOOP('',(#10430,#10431,#10432,#10433));
#2462=EDGE_LOOP('',(#10434,#10435,#10436));
#2463=EDGE_LOOP('',(#10437,#10438,#10439,#10440,#10441,#10442));
#2464=EDGE_LOOP('',(#10443,#10444,#10445,#10446));
#2465=EDGE_LOOP('',(#10447,#10448,#10449));
#2466=EDGE_LOOP('',(#10450,#10451,#10452,#10453,#10454,#10455,#10456,#10457,
#10458,#10459,#10460,#10461,#10462,#10463,#10464,#10465,#10466,#10467,#10468,
#10469));
#2467=EDGE_LOOP('',(#10470,#10471,#10472,#10473,#10474));
#2468=EDGE_LOOP('',(#10475,#10476,#10477,#10478));
#2469=EDGE_LOOP('',(#10479,#10480,#10481,#10482,#10483));
#2470=EDGE_LOOP('',(#10484,#10485,#10486,#10487));
#2471=EDGE_LOOP('',(#10488,#10489,#10490,#10491,#10492));
#2472=EDGE_LOOP('',(#10493,#10494,#10495,#10496));
#2473=EDGE_LOOP('',(#10497,#10498,#10499,#10500));
#2474=EDGE_LOOP('',(#10501,#10502,#10503,#10504,#10505));
#2475=EDGE_LOOP('',(#10506,#10507,#10508,#10509,#10510));
#2476=EDGE_LOOP('',(#10511,#10512,#10513,#10514));
#2477=EDGE_LOOP('',(#10515,#10516,#10517,#10518,#10519));
#2478=EDGE_LOOP('',(#10520,#10521,#10522,#10523,#10524,#10525));
#2479=EDGE_LOOP('',(#10526,#10527,#10528,#10529));
#2480=EDGE_LOOP('',(#10530,#10531,#10532,#10533,#10534));
#2481=EDGE_LOOP('',(#10535,#10536,#10537,#10538,#10539));
#2482=EDGE_LOOP('',(#10540,#10541,#10542,#10543));
#2483=EDGE_LOOP('',(#10544,#10545,#10546,#10547,#10548));
#2484=EDGE_LOOP('',(#10549,#10550,#10551,#10552,#10553));
#2485=EDGE_LOOP('',(#10554,#10555,#10556,#10557));
#2486=EDGE_LOOP('',(#10558,#10559,#10560,#10561));
#2487=EDGE_LOOP('',(#10562,#10563,#10564,#10565));
#2488=EDGE_LOOP('',(#10566,#10567,#10568,#10569,#10570,#10571,#10572));
#2489=EDGE_LOOP('',(#10573,#10574,#10575,#10576));
#2490=EDGE_LOOP('',(#10577,#10578,#10579,#10580));
#2491=EDGE_LOOP('',(#10581,#10582,#10583,#10584,#10585));
#2492=EDGE_LOOP('',(#10586,#10587,#10588,#10589));
#2493=EDGE_LOOP('',(#10590,#10591,#10592,#10593));
#2494=EDGE_LOOP('',(#10594,#10595,#10596,#10597));
#2495=EDGE_LOOP('',(#10598,#10599,#10600));
#2496=EDGE_LOOP('',(#10601,#10602,#10603));
#2497=EDGE_LOOP('',(#10604,#10605,#10606,#10607));
#2498=EDGE_LOOP('',(#10608,#10609,#10610,#10611,#10612,#10613,#10614));
#2499=EDGE_LOOP('',(#10615,#10616,#10617,#10618));
#2500=EDGE_LOOP('',(#10619,#10620,#10621,#10622));
#2501=EDGE_LOOP('',(#10623,#10624,#10625,#10626));
#2502=EDGE_LOOP('',(#10627,#10628,#10629,#10630,#10631));
#2503=EDGE_LOOP('',(#10632,#10633,#10634));
#2504=EDGE_LOOP('',(#10635,#10636,#10637));
#2505=EDGE_LOOP('',(#10638,#10639,#10640,#10641,#10642,#10643,#10644,#10645));
#2506=EDGE_LOOP('',(#10646,#10647,#10648,#10649,#10650,#10651,#10652,#10653,
#10654,#10655,#10656,#10657,#10658,#10659,#10660,#10661,#10662,#10663,#10664,
#10665));
#2507=EDGE_LOOP('',(#10666,#10667,#10668,#10669));
#2508=EDGE_LOOP('',(#10670,#10671,#10672,#10673));
#2509=EDGE_LOOP('',(#10674,#10675,#10676,#10677));
#2510=EDGE_LOOP('',(#10678,#10679,#10680,#10681));
#2511=EDGE_LOOP('',(#10682,#10683,#10684,#10685));
#2512=EDGE_LOOP('',(#10686,#10687,#10688,#10689));
#2513=EDGE_LOOP('',(#10690,#10691,#10692,#10693));
#2514=EDGE_LOOP('',(#10694,#10695,#10696,#10697));
#2515=EDGE_LOOP('',(#10698,#10699,#10700,#10701));
#2516=EDGE_LOOP('',(#10702,#10703,#10704,#10705,#10706,#10707));
#2517=EDGE_LOOP('',(#10708,#10709,#10710,#10711,#10712,#10713));
#2518=EDGE_LOOP('',(#10714,#10715,#10716,#10717));
#2519=EDGE_LOOP('',(#10718,#10719,#10720,#10721,#10722,#10723,#10724,#10725,
#10726,#10727,#10728,#10729,#10730,#10731,#10732,#10733,#10734,#10735,#10736,
#10737,#10738,#10739,#10740,#10741));
#2520=EDGE_LOOP('',(#10742,#10743,#10744));
#2521=EDGE_LOOP('',(#10745,#10746,#10747,#10748));
#2522=EDGE_LOOP('',(#10749,#10750,#10751));
#2523=EDGE_LOOP('',(#10752,#10753,#10754));
#2524=EDGE_LOOP('',(#10755,#10756,#10757,#10758));
#2525=EDGE_LOOP('',(#10759,#10760,#10761));
#2526=EDGE_LOOP('',(#10762,#10763,#10764,#10765));
#2527=EDGE_LOOP('',(#10766,#10767,#10768,#10769,#10770));
#2528=EDGE_LOOP('',(#10771,#10772,#10773,#10774,#10775));
#2529=EDGE_LOOP('',(#10776,#10777,#10778,#10779,#10780,#10781,#10782,#10783,
#10784));
#2530=EDGE_LOOP('',(#10785,#10786,#10787,#10788,#10789,#10790));
#2531=EDGE_LOOP('',(#10791,#10792,#10793,#10794,#10795,#10796,#10797,#10798,
#10799));
#2532=EDGE_LOOP('',(#10800,#10801,#10802,#10803,#10804,#10805,#10806,#10807,
#10808));
#2533=EDGE_LOOP('',(#10809,#10810,#10811,#10812,#10813));
#2534=EDGE_LOOP('',(#10814,#10815,#10816,#10817));
#2535=EDGE_LOOP('',(#10818,#10819,#10820,#10821));
#2536=EDGE_LOOP('',(#10822,#10823,#10824,#10825));
#2537=EDGE_LOOP('',(#10826,#10827,#10828,#10829));
#2538=EDGE_LOOP('',(#10830,#10831,#10832,#10833,#10834));
#2539=EDGE_LOOP('',(#10835,#10836,#10837,#10838));
#2540=EDGE_LOOP('',(#10839,#10840,#10841));
#2541=EDGE_LOOP('',(#10842,#10843,#10844,#10845));
#2542=EDGE_LOOP('',(#10846,#10847,#10848,#10849));
#2543=EDGE_LOOP('',(#10850,#10851,#10852,#10853));
#2544=EDGE_LOOP('',(#10854,#10855,#10856,#10857));
#2545=EDGE_LOOP('',(#10858,#10859,#10860,#10861));
#2546=EDGE_LOOP('',(#10862,#10863,#10864,#10865,#10866));
#2547=EDGE_LOOP('',(#10867,#10868,#10869,#10870));
#2548=EDGE_LOOP('',(#10871,#10872,#10873));
#2549=EDGE_LOOP('',(#10874,#10875,#10876,#10877));
#2550=EDGE_LOOP('',(#10878,#10879,#10880,#10881));
#2551=EDGE_LOOP('',(#10882,#10883,#10884,#10885));
#2552=EDGE_LOOP('',(#10886,#10887,#10888,#10889));
#2553=EDGE_LOOP('',(#10890,#10891,#10892,#10893,#10894,#10895));
#2554=EDGE_LOOP('',(#10896,#10897,#10898,#10899,#10900,#10901));
#2555=EDGE_LOOP('',(#10902,#10903,#10904,#10905));
#2556=EDGE_LOOP('',(#10906,#10907,#10908,#10909));
#2557=EDGE_LOOP('',(#10910,#10911,#10912,#10913));
#2558=EDGE_LOOP('',(#10914,#10915,#10916,#10917));
#2559=EDGE_LOOP('',(#10918,#10919,#10920,#10921));
#2560=EDGE_LOOP('',(#10922,#10923,#10924,#10925,#10926));
#2561=EDGE_LOOP('',(#10927,#10928,#10929,#10930));
#2562=EDGE_LOOP('',(#10931,#10932,#10933));
#2563=EDGE_LOOP('',(#10934,#10935,#10936,#10937));
#2564=EDGE_LOOP('',(#10938,#10939,#10940,#10941));
#2565=EDGE_LOOP('',(#10942,#10943,#10944,#10945));
#2566=EDGE_LOOP('',(#10946,#10947,#10948,#10949,#10950));
#2567=EDGE_LOOP('',(#10951,#10952,#10953,#10954));
#2568=EDGE_LOOP('',(#10955,#10956,#10957,#10958));
#2569=EDGE_LOOP('',(#10959,#10960,#10961,#10962));
#2570=EDGE_LOOP('',(#10963,#10964,#10965));
#2571=EDGE_LOOP('',(#10966,#10967,#10968,#10969));
#2572=EDGE_LOOP('',(#10970,#10971,#10972,#10973));
#2573=EDGE_LOOP('',(#10974,#10975,#10976,#10977));
#2574=EDGE_LOOP('',(#10978,#10979,#10980,#10981));
#2575=EDGE_LOOP('',(#10982,#10983,#10984,#10985));
#2576=EDGE_LOOP('',(#10986,#10987,#10988,#10989));
#2577=EDGE_LOOP('',(#10990,#10991,#10992,#10993,#10994,#10995));
#2578=EDGE_LOOP('',(#10996,#10997,#10998,#10999,#11000,#11001));
#2579=EDGE_LOOP('',(#11002,#11003,#11004,#11005,#11006,#11007));
#2580=EDGE_LOOP('',(#11008,#11009,#11010,#11011,#11012,#11013));
#2581=EDGE_LOOP('',(#11014,#11015,#11016,#11017,#11018,#11019));
#2582=EDGE_LOOP('',(#11020,#11021,#11022,#11023,#11024,#11025));
#2583=EDGE_LOOP('',(#11026,#11027,#11028,#11029));
#2584=EDGE_LOOP('',(#11030,#11031,#11032,#11033));
#2585=EDGE_LOOP('',(#11034,#11035,#11036,#11037,#11038,#11039));
#2586=EDGE_LOOP('',(#11040,#11041,#11042,#11043));
#2587=EDGE_LOOP('',(#11044,#11045,#11046,#11047));
#2588=EDGE_LOOP('',(#11048,#11049,#11050,#11051,#11052,#11053));
#2589=EDGE_LOOP('',(#11054,#11055,#11056,#11057));
#2590=EDGE_LOOP('',(#11058,#11059,#11060,#11061));
#2591=EDGE_LOOP('',(#11062,#11063,#11064,#11065,#11066,#11067,#11068,#11069));
#2592=EDGE_LOOP('',(#11070,#11071,#11072,#11073,#11074,#11075,#11076,#11077,
#11078,#11079,#11080,#11081));
#2593=EDGE_LOOP('',(#11082,#11083,#11084,#11085));
#2594=EDGE_LOOP('',(#11086,#11087,#11088,#11089));
#2595=EDGE_LOOP('',(#11090,#11091,#11092,#11093));
#2596=EDGE_LOOP('',(#11094,#11095,#11096,#11097));
#2597=EDGE_LOOP('',(#11098,#11099,#11100,#11101));
#2598=EDGE_LOOP('',(#11102,#11103,#11104,#11105));
#2599=EDGE_LOOP('',(#11106,#11107,#11108,#11109));
#2600=EDGE_LOOP('',(#11110,#11111,#11112,#11113));
#2601=EDGE_LOOP('',(#11114,#11115,#11116,#11117));
#2602=EDGE_LOOP('',(#11118,#11119,#11120,#11121));
#2603=EDGE_LOOP('',(#11122,#11123,#11124,#11125));
#2604=EDGE_LOOP('',(#11126,#11127,#11128,#11129));
#2605=EDGE_LOOP('',(#11130,#11131,#11132,#11133));
#2606=EDGE_LOOP('',(#11134,#11135,#11136,#11137));
#2607=EDGE_LOOP('',(#11138,#11139,#11140,#11141));
#2608=EDGE_LOOP('',(#11142,#11143,#11144));
#2609=EDGE_LOOP('',(#11145,#11146,#11147,#11148));
#2610=EDGE_LOOP('',(#11149,#11150,#11151,#11152));
#2611=EDGE_LOOP('',(#11153,#11154,#11155,#11156,#11157,#11158));
#2612=EDGE_LOOP('',(#11159,#11160,#11161,#11162));
#2613=EDGE_LOOP('',(#11163,#11164,#11165,#11166));
#2614=EDGE_LOOP('',(#11167,#11168,#11169));
#2615=EDGE_LOOP('',(#11170,#11171,#11172,#11173));
#2616=EDGE_LOOP('',(#11174,#11175,#11176,#11177));
#2617=EDGE_LOOP('',(#11178,#11179,#11180));
#2618=EDGE_LOOP('',(#11181,#11182,#11183,#11184,#11185,#11186));
#2619=EDGE_LOOP('',(#11187,#11188,#11189,#11190));
#2620=EDGE_LOOP('',(#11191,#11192,#11193));
#2621=EDGE_LOOP('',(#11194,#11195,#11196,#11197,#11198,#11199,#11200,#11201,
#11202,#11203,#11204,#11205,#11206,#11207,#11208,#11209,#11210,#11211,#11212,
#11213,#11214,#11215,#11216,#11217,#11218,#11219,#11220,#11221,#11222,#11223,
#11224,#11225,#11226,#11227,#11228,#11229,#11230,#11231,#11232,#11233,#11234,
#11235,#11236,#11237,#11238,#11239,#11240,#11241,#11242,#11243,#11244,#11245,
#11246,#11247,#11248,#11249,#11250,#11251,#11252,#11253,#11254,#11255,#11256,
#11257));
#2622=EDGE_LOOP('',(#11258,#11259,#11260,#11261,#11262,#11263,#11264,#11265));
#2623=EDGE_LOOP('',(#11266,#11267,#11268,#11269,#11270,#11271,#11272,#11273,
#11274,#11275,#11276,#11277,#11278,#11279,#11280,#11281,#11282,#11283,#11284,
#11285));
#2624=EDGE_LOOP('',(#11286,#11287,#11288,#11289,#11290));
#2625=EDGE_LOOP('',(#11291,#11292,#11293,#11294));
#2626=EDGE_LOOP('',(#11295,#11296,#11297,#11298,#11299));
#2627=EDGE_LOOP('',(#11300,#11301,#11302,#11303));
#2628=EDGE_LOOP('',(#11304,#11305,#11306,#11307,#11308));
#2629=EDGE_LOOP('',(#11309,#11310,#11311,#11312));
#2630=EDGE_LOOP('',(#11313,#11314,#11315,#11316));
#2631=EDGE_LOOP('',(#11317,#11318,#11319,#11320,#11321));
#2632=EDGE_LOOP('',(#11322,#11323,#11324,#11325,#11326));
#2633=EDGE_LOOP('',(#11327,#11328,#11329,#11330));
#2634=EDGE_LOOP('',(#11331,#11332,#11333,#11334,#11335));
#2635=EDGE_LOOP('',(#11336,#11337,#11338,#11339,#11340,#11341));
#2636=EDGE_LOOP('',(#11342,#11343,#11344,#11345));
#2637=EDGE_LOOP('',(#11346,#11347,#11348,#11349,#11350));
#2638=EDGE_LOOP('',(#11351,#11352,#11353,#11354,#11355));
#2639=EDGE_LOOP('',(#11356,#11357,#11358,#11359));
#2640=EDGE_LOOP('',(#11360,#11361,#11362,#11363,#11364));
#2641=EDGE_LOOP('',(#11365,#11366,#11367,#11368,#11369));
#2642=EDGE_LOOP('',(#11370,#11371,#11372,#11373));
#2643=EDGE_LOOP('',(#11374,#11375,#11376,#11377));
#2644=EDGE_LOOP('',(#11378,#11379,#11380,#11381));
#2645=EDGE_LOOP('',(#11382,#11383,#11384,#11385,#11386,#11387,#11388));
#2646=EDGE_LOOP('',(#11389,#11390,#11391,#11392));
#2647=EDGE_LOOP('',(#11393,#11394,#11395,#11396));
#2648=EDGE_LOOP('',(#11397,#11398,#11399,#11400,#11401));
#2649=EDGE_LOOP('',(#11402,#11403,#11404,#11405));
#2650=EDGE_LOOP('',(#11406,#11407,#11408,#11409));
#2651=EDGE_LOOP('',(#11410,#11411,#11412,#11413));
#2652=EDGE_LOOP('',(#11414,#11415,#11416));
#2653=EDGE_LOOP('',(#11417,#11418,#11419));
#2654=EDGE_LOOP('',(#11420,#11421,#11422,#11423));
#2655=EDGE_LOOP('',(#11424,#11425,#11426,#11427,#11428,#11429,#11430));
#2656=EDGE_LOOP('',(#11431,#11432,#11433,#11434));
#2657=EDGE_LOOP('',(#11435,#11436,#11437,#11438));
#2658=EDGE_LOOP('',(#11439,#11440,#11441,#11442));
#2659=EDGE_LOOP('',(#11443,#11444,#11445,#11446,#11447));
#2660=EDGE_LOOP('',(#11448,#11449,#11450));
#2661=EDGE_LOOP('',(#11451,#11452,#11453));
#2662=EDGE_LOOP('',(#11454,#11455,#11456,#11457,#11458,#11459,#11460,#11461));
#2663=EDGE_LOOP('',(#11462,#11463,#11464,#11465,#11466,#11467,#11468,#11469,
#11470,#11471,#11472,#11473,#11474,#11475,#11476,#11477,#11478,#11479,#11480,
#11481));
#2664=EDGE_LOOP('',(#11482,#11483,#11484,#11485));
#2665=EDGE_LOOP('',(#11486,#11487,#11488,#11489));
#2666=EDGE_LOOP('',(#11490,#11491,#11492,#11493));
#2667=EDGE_LOOP('',(#11494,#11495,#11496,#11497));
#2668=EDGE_LOOP('',(#11498,#11499,#11500,#11501));
#2669=EDGE_LOOP('',(#11502,#11503,#11504,#11505));
#2670=EDGE_LOOP('',(#11506,#11507,#11508,#11509));
#2671=EDGE_LOOP('',(#11510,#11511,#11512,#11513));
#2672=EDGE_LOOP('',(#11514,#11515,#11516,#11517));
#2673=EDGE_LOOP('',(#11518,#11519,#11520,#11521,#11522,#11523));
#2674=EDGE_LOOP('',(#11524,#11525,#11526,#11527,#11528));
#2675=EDGE_LOOP('',(#11529,#11530,#11531,#11532,#11533,#11534,#11535,#11536,
#11537,#11538,#11539,#11540));
#2676=EDGE_LOOP('',(#11541,#11542,#11543,#11544,#11545,#11546));
#2677=EDGE_LOOP('',(#11547,#11548,#11549,#11550,#11551));
#2678=EDGE_LOOP('',(#11552,#11553,#11554,#11555,#11556));
#2679=EDGE_LOOP('',(#11557,#11558,#11559,#11560,#11561,#11562));
#2680=EDGE_LOOP('',(#11563,#11564,#11565,#11566));
#2681=EDGE_LOOP('',(#11567,#11568,#11569,#11570));
#2682=EDGE_LOOP('',(#11571,#11572,#11573,#11574));
#2683=EDGE_LOOP('',(#11575,#11576,#11577,#11578,#11579,#11580));
#2684=EDGE_LOOP('',(#11581,#11582,#11583,#11584,#11585,#11586));
#2685=EDGE_LOOP('',(#11587,#11588,#11589,#11590,#11591,#11592));
#2686=EDGE_LOOP('',(#11593,#11594,#11595,#11596,#11597,#11598));
#2687=EDGE_LOOP('',(#11599,#11600,#11601,#11602,#11603,#11604));
#2688=EDGE_LOOP('',(#11605,#11606,#11607,#11608,#11609,#11610));
#2689=EDGE_LOOP('',(#11611,#11612,#11613,#11614));
#2690=EDGE_LOOP('',(#11615,#11616,#11617,#11618));
#2691=EDGE_LOOP('',(#11619,#11620,#11621,#11622,#11623,#11624));
#2692=EDGE_LOOP('',(#11625,#11626,#11627,#11628));
#2693=EDGE_LOOP('',(#11629,#11630,#11631,#11632));
#2694=EDGE_LOOP('',(#11633,#11634,#11635,#11636,#11637,#11638));
#2695=EDGE_LOOP('',(#11639,#11640,#11641,#11642));
#2696=EDGE_LOOP('',(#11643,#11644,#11645,#11646));
#2697=EDGE_LOOP('',(#11647,#11648,#11649,#11650,#11651,#11652,#11653,#11654,
#11655,#11656,#11657,#11658));
#2698=EDGE_LOOP('',(#11659,#11660,#11661,#11662));
#2699=EDGE_LOOP('',(#11663,#11664,#11665,#11666));
#2700=EDGE_LOOP('',(#11667,#11668,#11669,#11670));
#2701=EDGE_LOOP('',(#11671,#11672,#11673,#11674));
#2702=EDGE_LOOP('',(#11675,#11676,#11677,#11678));
#2703=EDGE_LOOP('',(#11679,#11680,#11681,#11682));
#2704=EDGE_LOOP('',(#11683,#11684,#11685,#11686));
#2705=EDGE_LOOP('',(#11687,#11688,#11689,#11690));
#2706=EDGE_LOOP('',(#11691,#11692,#11693,#11694));
#2707=EDGE_LOOP('',(#11695,#11696,#11697,#11698));
#2708=EDGE_LOOP('',(#11699,#11700,#11701,#11702));
#2709=EDGE_LOOP('',(#11703,#11704,#11705,#11706));
#2710=EDGE_LOOP('',(#11707,#11708,#11709,#11710));
#2711=EDGE_LOOP('',(#11711,#11712,#11713,#11714));
#2712=EDGE_LOOP('',(#11715,#11716,#11717));
#2713=EDGE_LOOP('',(#11718,#11719,#11720,#11721));
#2714=EDGE_LOOP('',(#11722,#11723,#11724,#11725));
#2715=EDGE_LOOP('',(#11726,#11727,#11728,#11729,#11730,#11731));
#2716=EDGE_LOOP('',(#11732,#11733,#11734,#11735));
#2717=EDGE_LOOP('',(#11736,#11737,#11738,#11739));
#2718=EDGE_LOOP('',(#11740,#11741,#11742));
#2719=EDGE_LOOP('',(#11743,#11744,#11745,#11746));
#2720=EDGE_LOOP('',(#11747,#11748,#11749,#11750));
#2721=EDGE_LOOP('',(#11751,#11752,#11753));
#2722=EDGE_LOOP('',(#11754,#11755,#11756,#11757,#11758,#11759));
#2723=EDGE_LOOP('',(#11760,#11761,#11762,#11763));
#2724=EDGE_LOOP('',(#11764,#11765,#11766));
#2725=EDGE_LOOP('',(#11767,#11768,#11769,#11770,#11771,#11772,#11773,#11774,
#11775,#11776,#11777,#11778,#11779,#11780,#11781,#11782,#11783,#11784,#11785,
#11786));
#2726=EDGE_LOOP('',(#11787,#11788,#11789,#11790,#11791));
#2727=EDGE_LOOP('',(#11792,#11793,#11794,#11795));
#2728=EDGE_LOOP('',(#11796,#11797,#11798,#11799,#11800));
#2729=EDGE_LOOP('',(#11801,#11802,#11803,#11804));
#2730=EDGE_LOOP('',(#11805,#11806,#11807,#11808,#11809));
#2731=EDGE_LOOP('',(#11810,#11811,#11812,#11813));
#2732=EDGE_LOOP('',(#11814,#11815,#11816,#11817));
#2733=EDGE_LOOP('',(#11818,#11819,#11820,#11821,#11822));
#2734=EDGE_LOOP('',(#11823,#11824,#11825,#11826,#11827));
#2735=EDGE_LOOP('',(#11828,#11829,#11830,#11831));
#2736=EDGE_LOOP('',(#11832,#11833,#11834,#11835,#11836));
#2737=EDGE_LOOP('',(#11837,#11838,#11839,#11840,#11841,#11842));
#2738=EDGE_LOOP('',(#11843,#11844,#11845,#11846));
#2739=EDGE_LOOP('',(#11847,#11848,#11849,#11850,#11851));
#2740=EDGE_LOOP('',(#11852,#11853,#11854,#11855,#11856));
#2741=EDGE_LOOP('',(#11857,#11858,#11859,#11860));
#2742=EDGE_LOOP('',(#11861,#11862,#11863,#11864,#11865));
#2743=EDGE_LOOP('',(#11866,#11867,#11868,#11869,#11870));
#2744=EDGE_LOOP('',(#11871,#11872,#11873,#11874));
#2745=EDGE_LOOP('',(#11875,#11876,#11877,#11878));
#2746=EDGE_LOOP('',(#11879,#11880,#11881,#11882));
#2747=EDGE_LOOP('',(#11883,#11884,#11885,#11886,#11887,#11888,#11889));
#2748=EDGE_LOOP('',(#11890,#11891,#11892,#11893));
#2749=EDGE_LOOP('',(#11894,#11895,#11896,#11897));
#2750=EDGE_LOOP('',(#11898,#11899,#11900,#11901,#11902));
#2751=EDGE_LOOP('',(#11903,#11904,#11905,#11906));
#2752=EDGE_LOOP('',(#11907,#11908,#11909,#11910));
#2753=EDGE_LOOP('',(#11911,#11912,#11913,#11914));
#2754=EDGE_LOOP('',(#11915,#11916,#11917));
#2755=EDGE_LOOP('',(#11918,#11919,#11920));
#2756=EDGE_LOOP('',(#11921,#11922,#11923,#11924));
#2757=EDGE_LOOP('',(#11925,#11926,#11927,#11928,#11929,#11930,#11931));
#2758=EDGE_LOOP('',(#11932,#11933,#11934,#11935));
#2759=EDGE_LOOP('',(#11936,#11937,#11938,#11939));
#2760=EDGE_LOOP('',(#11940,#11941,#11942,#11943));
#2761=EDGE_LOOP('',(#11944,#11945,#11946,#11947,#11948));
#2762=EDGE_LOOP('',(#11949,#11950,#11951));
#2763=EDGE_LOOP('',(#11952,#11953,#11954));
#2764=EDGE_LOOP('',(#11955,#11956,#11957,#11958,#11959,#11960,#11961,#11962));
#2765=EDGE_LOOP('',(#11963,#11964,#11965,#11966,#11967,#11968,#11969,#11970,
#11971,#11972,#11973,#11974,#11975,#11976,#11977,#11978,#11979,#11980,#11981,
#11982));
#2766=EDGE_LOOP('',(#11983,#11984,#11985,#11986));
#2767=EDGE_LOOP('',(#11987,#11988,#11989,#11990));
#2768=EDGE_LOOP('',(#11991,#11992,#11993,#11994));
#2769=EDGE_LOOP('',(#11995,#11996,#11997,#11998));
#2770=EDGE_LOOP('',(#11999,#12000,#12001,#12002));
#2771=EDGE_LOOP('',(#12003,#12004,#12005,#12006));
#2772=EDGE_LOOP('',(#12007,#12008,#12009,#12010));
#2773=EDGE_LOOP('',(#12011,#12012,#12013,#12014));
#2774=EDGE_LOOP('',(#12015,#12016,#12017,#12018));
#2775=EDGE_LOOP('',(#12019,#12020,#12021,#12022,#12023,#12024));
#2776=EDGE_LOOP('',(#12025,#12026,#12027,#12028,#12029,#12030));
#2777=EDGE_LOOP('',(#12031,#12032,#12033,#12034));
#2778=EDGE_LOOP('',(#12035,#12036,#12037,#12038,#12039,#12040,#12041,#12042,
#12043,#12044,#12045,#12046,#12047,#12048,#12049,#12050,#12051,#12052,#12053,
#12054,#12055,#12056,#12057,#12058));
#2779=EDGE_LOOP('',(#12059,#12060,#12061,#12062,#12063));
#2780=EDGE_LOOP('',(#12064,#12065,#12066,#12067,#12068,#12069,#12070,#12071,
#12072,#12073,#12074,#12075,#12076,#12077,#12078,#12079,#12080,#12081));
#2781=EDGE_LOOP('',(#12082,#12083,#12084,#12085,#12086,#12087));
#2782=EDGE_LOOP('',(#12088,#12089,#12090,#12091,#12092));
#2783=EDGE_LOOP('',(#12093,#12094,#12095,#12096,#12097,#12098,#12099,#12100,
#12101));
#2784=EDGE_LOOP('',(#12102,#12103,#12104,#12105,#12106,#12107,#12108,#12109));
#2785=EDGE_LOOP('',(#12110,#12111,#12112,#12113));
#2786=EDGE_LOOP('',(#12114,#12115,#12116,#12117,#12118));
#2787=EDGE_LOOP('',(#12119,#12120,#12121,#12122,#12123,#12124));
#2788=EDGE_LOOP('',(#12125,#12126,#12127,#12128,#12129));
#2789=EDGE_LOOP('',(#12130,#12131,#12132,#12133));
#2790=EDGE_LOOP('',(#12134,#12135,#12136,#12137));
#2791=EDGE_LOOP('',(#12138,#12139,#12140,#12141));
#2792=EDGE_LOOP('',(#12142,#12143,#12144,#12145));
#2793=EDGE_LOOP('',(#12146,#12147,#12148,#12149));
#2794=EDGE_LOOP('',(#12150,#12151,#12152,#12153));
#2795=EDGE_LOOP('',(#12154,#12155,#12156,#12157));
#2796=EDGE_LOOP('',(#12158,#12159,#12160,#12161));
#2797=EDGE_LOOP('',(#12162,#12163,#12164,#12165));
#2798=EDGE_LOOP('',(#12166,#12167,#12168,#12169));
#2799=EDGE_LOOP('',(#12170,#12171,#12172,#12173));
#2800=EDGE_LOOP('',(#12174,#12175,#12176,#12177));
#2801=EDGE_LOOP('',(#12178,#12179,#12180,#12181));
#2802=EDGE_LOOP('',(#12182,#12183,#12184,#12185));
#2803=EDGE_LOOP('',(#12186,#12187,#12188,#12189));
#2804=EDGE_LOOP('',(#12190,#12191,#12192,#12193));
#2805=EDGE_LOOP('',(#12194,#12195,#12196,#12197));
#2806=EDGE_LOOP('',(#12198,#12199,#12200,#12201));
#2807=EDGE_LOOP('',(#12202,#12203,#12204,#12205));
#2808=EDGE_LOOP('',(#12206,#12207,#12208,#12209));
#2809=EDGE_LOOP('',(#12210,#12211,#12212,#12213));
#2810=EDGE_LOOP('',(#12214,#12215,#12216,#12217));
#2811=EDGE_LOOP('',(#12218,#12219,#12220,#12221));
#2812=EDGE_LOOP('',(#12222,#12223,#12224,#12225));
#2813=EDGE_LOOP('',(#12226,#12227,#12228,#12229));
#2814=EDGE_LOOP('',(#12230,#12231,#12232,#12233));
#2815=EDGE_LOOP('',(#12234,#12235,#12236,#12237));
#2816=EDGE_LOOP('',(#12238,#12239,#12240,#12241));
#2817=EDGE_LOOP('',(#12242,#12243,#12244,#12245,#12246,#12247,#12248,#12249));
#2818=EDGE_LOOP('',(#12250,#12251,#12252,#12253,#12254,#12255,#12256,#12257));
#2819=EDGE_LOOP('',(#12258,#12259,#12260,#12261,#12262,#12263,#12264,#12265));
#2820=EDGE_LOOP('',(#12266,#12267,#12268,#12269));
#2821=EDGE_LOOP('',(#12270));
#2822=EDGE_LOOP('',(#12271));
#2823=EDGE_LOOP('',(#12272,#12273,#12274,#12275));
#2824=EDGE_LOOP('',(#12276,#12277,#12278,#12279));
#2825=EDGE_LOOP('',(#12280,#12281,#12282,#12283,#12284));
#2826=EDGE_LOOP('',(#12285,#12286,#12287,#12288,#12289,#12290,#12291));
#2827=EDGE_LOOP('',(#12292,#12293,#12294,#12295));
#2828=EDGE_LOOP('',(#12296,#12297,#12298,#12299));
#2829=EDGE_LOOP('',(#12300,#12301,#12302,#12303));
#2830=EDGE_LOOP('',(#12304,#12305,#12306,#12307));
#2831=EDGE_LOOP('',(#12308,#12309,#12310,#12311));
#2832=EDGE_LOOP('',(#12312,#12313,#12314,#12315,#12316,#12317,#12318,#12319,
#12320,#12321,#12322));
#2833=EDGE_LOOP('',(#12323,#12324,#12325,#12326,#12327,#12328,#12329));
#2834=EDGE_LOOP('',(#12330,#12331,#12332,#12333,#12334));
#2835=EDGE_LOOP('',(#12335,#12336,#12337,#12338));
#2836=EDGE_LOOP('',(#12339,#12340,#12341,#12342));
#2837=EDGE_LOOP('',(#12343,#12344,#12345,#12346,#12347,#12348));
#2838=EDGE_LOOP('',(#12349,#12350,#12351,#12352));
#2839=EDGE_LOOP('',(#12353,#12354,#12355,#12356));
#2840=EDGE_LOOP('',(#12357,#12358,#12359,#12360));
#2841=EDGE_LOOP('',(#12361,#12362,#12363,#12364));
#2842=EDGE_LOOP('',(#12365,#12366,#12367,#12368));
#2843=EDGE_LOOP('',(#12369,#12370,#12371,#12372,#12373,#12374));
#2844=EDGE_LOOP('',(#12375,#12376,#12377,#12378,#12379,#12380,#12381));
#2845=EDGE_LOOP('',(#12382,#12383,#12384,#12385));
#2846=EDGE_LOOP('',(#12386,#12387,#12388,#12389,#12390));
#2847=EDGE_LOOP('',(#12391,#12392,#12393,#12394));
#2848=EDGE_LOOP('',(#12395,#12396,#12397,#12398));
#2849=EDGE_LOOP('',(#12399,#12400,#12401,#12402));
#2850=EDGE_LOOP('',(#12403,#12404,#12405,#12406));
#2851=EDGE_LOOP('',(#12407,#12408,#12409,#12410));
#2852=EDGE_LOOP('',(#12411,#12412,#12413,#12414));
#2853=EDGE_LOOP('',(#12415,#12416,#12417,#12418));
#2854=EDGE_LOOP('',(#12419,#12420,#12421,#12422));
#2855=EDGE_LOOP('',(#12423,#12424,#12425,#12426));
#2856=EDGE_LOOP('',(#12427,#12428,#12429,#12430));
#2857=EDGE_LOOP('',(#12431,#12432,#12433,#12434));
#2858=EDGE_LOOP('',(#12435,#12436,#12437,#12438));
#2859=EDGE_LOOP('',(#12439,#12440,#12441,#12442));
#2860=EDGE_LOOP('',(#12443,#12444,#12445,#12446));
#2861=EDGE_LOOP('',(#12447,#12448,#12449,#12450));
#2862=EDGE_LOOP('',(#12451,#12452,#12453,#12454));
#2863=EDGE_LOOP('',(#12455,#12456,#12457,#12458));
#2864=EDGE_LOOP('',(#12459,#12460,#12461,#12462));
#2865=EDGE_LOOP('',(#12463,#12464,#12465,#12466));
#2866=EDGE_LOOP('',(#12467,#12468,#12469,#12470));
#2867=EDGE_LOOP('',(#12471,#12472,#12473,#12474));
#2868=EDGE_LOOP('',(#12475,#12476,#12477,#12478));
#2869=EDGE_LOOP('',(#12479,#12480,#12481,#12482));
#2870=EDGE_LOOP('',(#12483,#12484,#12485,#12486));
#2871=EDGE_LOOP('',(#12487,#12488,#12489,#12490));
#2872=EDGE_LOOP('',(#12491,#12492,#12493,#12494));
#2873=EDGE_LOOP('',(#12495,#12496,#12497,#12498));
#2874=EDGE_LOOP('',(#12499,#12500,#12501,#12502));
#2875=EDGE_LOOP('',(#12503,#12504,#12505,#12506));
#2876=EDGE_LOOP('',(#12507,#12508,#12509,#12510));
#2877=EDGE_LOOP('',(#12511,#12512,#12513,#12514));
#2878=EDGE_LOOP('',(#12515,#12516,#12517,#12518));
#2879=EDGE_LOOP('',(#12519,#12520,#12521,#12522));
#2880=EDGE_LOOP('',(#12523,#12524,#12525,#12526));
#2881=EDGE_LOOP('',(#12527,#12528,#12529,#12530));
#2882=EDGE_LOOP('',(#12531,#12532,#12533,#12534));
#2883=EDGE_LOOP('',(#12535,#12536,#12537,#12538));
#2884=EDGE_LOOP('',(#12539,#12540,#12541,#12542));
#2885=EDGE_LOOP('',(#12543,#12544,#12545,#12546));
#2886=EDGE_LOOP('',(#12547,#12548,#12549,#12550));
#2887=EDGE_LOOP('',(#12551,#12552,#12553,#12554));
#2888=EDGE_LOOP('',(#12555,#12556,#12557,#12558));
#2889=EDGE_LOOP('',(#12559,#12560,#12561,#12562));
#2890=EDGE_LOOP('',(#12563,#12564,#12565,#12566));
#2891=EDGE_LOOP('',(#12567,#12568,#12569,#12570));
#2892=EDGE_LOOP('',(#12571,#12572,#12573,#12574));
#2893=EDGE_LOOP('',(#12575,#12576,#12577,#12578));
#2894=EDGE_LOOP('',(#12579,#12580,#12581,#12582));
#2895=EDGE_LOOP('',(#12583,#12584,#12585,#12586));
#2896=EDGE_LOOP('',(#12587,#12588,#12589,#12590));
#2897=EDGE_LOOP('',(#12591,#12592,#12593,#12594));
#2898=EDGE_LOOP('',(#12595,#12596,#12597,#12598));
#2899=EDGE_LOOP('',(#12599,#12600,#12601,#12602));
#2900=EDGE_LOOP('',(#12603,#12604,#12605,#12606));
#2901=EDGE_LOOP('',(#12607,#12608,#12609,#12610));
#2902=EDGE_LOOP('',(#12611,#12612,#12613,#12614));
#2903=EDGE_LOOP('',(#12615,#12616,#12617,#12618));
#2904=EDGE_LOOP('',(#12619,#12620,#12621,#12622));
#2905=EDGE_LOOP('',(#12623,#12624,#12625,#12626));
#2906=EDGE_LOOP('',(#12627,#12628,#12629,#12630));
#2907=EDGE_LOOP('',(#12631,#12632,#12633,#12634));
#2908=EDGE_LOOP('',(#12635,#12636,#12637,#12638));
#2909=EDGE_LOOP('',(#12639,#12640,#12641,#12642));
#2910=EDGE_LOOP('',(#12643,#12644,#12645,#12646));
#2911=EDGE_LOOP('',(#12647,#12648,#12649,#12650));
#2912=EDGE_LOOP('',(#12651,#12652,#12653,#12654));
#2913=EDGE_LOOP('',(#12655,#12656,#12657,#12658));
#2914=EDGE_LOOP('',(#12659,#12660,#12661,#12662));
#2915=EDGE_LOOP('',(#12663,#12664,#12665,#12666));
#2916=EDGE_LOOP('',(#12667,#12668,#12669,#12670));
#2917=EDGE_LOOP('',(#12671,#12672,#12673,#12674));
#2918=EDGE_LOOP('',(#12675,#12676,#12677,#12678));
#2919=EDGE_LOOP('',(#12679,#12680,#12681,#12682));
#2920=EDGE_LOOP('',(#12683,#12684,#12685,#12686));
#2921=EDGE_LOOP('',(#12687,#12688,#12689,#12690));
#2922=EDGE_LOOP('',(#12691,#12692,#12693,#12694));
#2923=EDGE_LOOP('',(#12695,#12696,#12697,#12698));
#2924=EDGE_LOOP('',(#12699,#12700,#12701,#12702));
#2925=EDGE_LOOP('',(#12703,#12704,#12705,#12706));
#2926=EDGE_LOOP('',(#12707,#12708,#12709,#12710));
#2927=EDGE_LOOP('',(#12711,#12712,#12713,#12714));
#2928=EDGE_LOOP('',(#12715,#12716,#12717,#12718));
#2929=EDGE_LOOP('',(#12719,#12720,#12721,#12722));
#2930=EDGE_LOOP('',(#12723,#12724,#12725,#12726));
#2931=EDGE_LOOP('',(#12727,#12728,#12729,#12730));
#2932=EDGE_LOOP('',(#12731,#12732,#12733,#12734));
#2933=EDGE_LOOP('',(#12735,#12736,#12737,#12738));
#2934=EDGE_LOOP('',(#12739,#12740,#12741,#12742));
#2935=EDGE_LOOP('',(#12743,#12744,#12745,#12746));
#2936=EDGE_LOOP('',(#12747,#12748,#12749,#12750));
#2937=EDGE_LOOP('',(#12751,#12752,#12753,#12754));
#2938=EDGE_LOOP('',(#12755,#12756,#12757,#12758));
#2939=EDGE_LOOP('',(#12759,#12760,#12761,#12762));
#2940=EDGE_LOOP('',(#12763,#12764,#12765,#12766));
#2941=EDGE_LOOP('',(#12767,#12768,#12769,#12770));
#2942=EDGE_LOOP('',(#12771,#12772,#12773,#12774));
#2943=EDGE_LOOP('',(#12775,#12776,#12777,#12778));
#2944=EDGE_LOOP('',(#12779,#12780,#12781,#12782));
#2945=EDGE_LOOP('',(#12783,#12784,#12785,#12786));
#2946=EDGE_LOOP('',(#12787,#12788,#12789,#12790));
#2947=EDGE_LOOP('',(#12791,#12792,#12793,#12794));
#2948=EDGE_LOOP('',(#12795,#12796,#12797,#12798,#12799));
#2949=EDGE_LOOP('',(#12800,#12801,#12802,#12803));
#2950=EDGE_LOOP('',(#12804,#12805,#12806,#12807));
#2951=EDGE_LOOP('',(#12808,#12809,#12810,#12811));
#2952=EDGE_LOOP('',(#12812,#12813,#12814,#12815));
#2953=EDGE_LOOP('',(#12816,#12817,#12818,#12819));
#2954=EDGE_LOOP('',(#12820,#12821,#12822,#12823));
#2955=EDGE_LOOP('',(#12824,#12825,#12826,#12827));
#2956=EDGE_LOOP('',(#12828,#12829,#12830,#12831,#12832));
#2957=EDGE_LOOP('',(#12833,#12834,#12835,#12836));
#2958=EDGE_LOOP('',(#12837,#12838,#12839,#12840,#12841,#12842));
#2959=EDGE_LOOP('',(#12843));
#2960=EDGE_LOOP('',(#12844));
#2961=LINE('',#18509,#3742);
#2962=LINE('',#18967,#3743);
#2963=LINE('',#18971,#3744);
#2964=LINE('',#18976,#3745);
#2965=LINE('',#18977,#3746);
#2966=LINE('',#18978,#3747);
#2967=LINE('',#18982,#3748);
#2968=LINE('',#18988,#3749);
#2969=LINE('',#18992,#3750);
#2970=LINE('',#18996,#3751);
#2971=LINE('',#19000,#3752);
#2972=LINE('',#19004,#3753);
#2973=LINE('',#19008,#3754);
#2974=LINE('',#19013,#3755);
#2975=LINE('',#19014,#3756);
#2976=LINE('',#19016,#3757);
#2977=LINE('',#19018,#3758);
#2978=LINE('',#19019,#3759);
#2979=LINE('',#19021,#3760);
#2980=LINE('',#19023,#3761);
#2981=LINE('',#19024,#3762);
#2982=LINE('',#19025,#3763);
#2983=LINE('',#19029,#3764);
#2984=LINE('',#19035,#3765);
#2985=LINE('',#19039,#3766);
#2986=LINE('',#19044,#3767);
#2987=LINE('',#19084,#3768);
#2988=LINE('',#19086,#3769);
#2989=LINE('',#19088,#3770);
#2990=LINE('',#19090,#3771);
#2991=LINE('',#19092,#3772);
#2992=LINE('',#19096,#3773);
#2993=LINE('',#19100,#3774);
#2994=LINE('',#19101,#3775);
#2995=LINE('',#19104,#3776);
#2996=LINE('',#19106,#3777);
#2997=LINE('',#19108,#3778);
#2998=LINE('',#19110,#3779);
#2999=LINE('',#19112,#3780);
#3000=LINE('',#19114,#3781);
#3001=LINE('',#19127,#3782);
#3002=LINE('',#19140,#3783);
#3003=LINE('',#19141,#3784);
#3004=LINE('',#19145,#3785);
#3005=LINE('',#19149,#3786);
#3006=LINE('',#19158,#3787);
#3007=LINE('',#19160,#3788);
#3008=LINE('',#19162,#3789);
#3009=LINE('',#19165,#3790);
#3010=LINE('',#19169,#3791);
#3011=LINE('',#19170,#3792);
#3012=LINE('',#19172,#3793);
#3013=LINE('',#19185,#3794);
#3014=LINE('',#19198,#3795);
#3015=LINE('',#19200,#3796);
#3016=LINE('',#19201,#3797);
#3017=LINE('',#19205,#3798);
#3018=LINE('',#19248,#3799);
#3019=LINE('',#19250,#3800);
#3020=LINE('',#19257,#3801);
#3021=LINE('',#19259,#3802);
#3022=LINE('',#19265,#3803);
#3023=LINE('',#19269,#3804);
#3024=LINE('',#19271,#3805);
#3025=LINE('',#19273,#3806);
#3026=LINE('',#19275,#3807);
#3027=LINE('',#19277,#3808);
#3028=LINE('',#19279,#3809);
#3029=LINE('',#19281,#3810);
#3030=LINE('',#19283,#3811);
#3031=LINE('',#19285,#3812);
#3032=LINE('',#19287,#3813);
#3033=LINE('',#19289,#3814);
#3034=LINE('',#19290,#3815);
#3035=LINE('',#19294,#3816);
#3036=LINE('',#19299,#3817);
#3037=LINE('',#19304,#3818);
#3038=LINE('',#19310,#3819);
#3039=LINE('',#19312,#3820);
#3040=LINE('',#19316,#3821);
#3041=LINE('',#19320,#3822);
#3042=LINE('',#19322,#3823);
#3043=LINE('',#19324,#3824);
#3044=LINE('',#19326,#3825);
#3045=LINE('',#19365,#3826);
#3046=LINE('',#19369,#3827);
#3047=LINE('',#19371,#3828);
#3048=LINE('',#19373,#3829);
#3049=LINE('',#19375,#3830);
#3050=LINE('',#19377,#3831);
#3051=LINE('',#19379,#3832);
#3052=LINE('',#19392,#3833);
#3053=LINE('',#19404,#3834);
#3054=LINE('',#19408,#3835);
#3055=LINE('',#19410,#3836);
#3056=LINE('',#19412,#3837);
#3057=LINE('',#19414,#3838);
#3058=LINE('',#20126,#3839);
#3059=LINE('',#20127,#3840);
#3060=LINE('',#20155,#3841);
#3061=LINE('',#20162,#3842);
#3062=LINE('',#20209,#3843);
#3063=LINE('',#20211,#3844);
#3064=LINE('',#20213,#3845);
#3065=LINE('',#20215,#3846);
#3066=LINE('',#20217,#3847);
#3067=LINE('',#20219,#3848);
#3068=LINE('',#20221,#3849);
#3069=LINE('',#20222,#3850);
#3070=LINE('',#20360,#3851);
#3071=LINE('',#20365,#3852);
#3072=LINE('',#20368,#3853);
#3073=LINE('',#20372,#3854);
#3074=LINE('',#20373,#3855);
#3075=LINE('',#20376,#3856);
#3076=LINE('',#20380,#3857);
#3077=LINE('',#20381,#3858);
#3078=LINE('',#21104,#3859);
#3079=LINE('',#21107,#3860);
#3080=LINE('',#21178,#3861);
#3081=LINE('',#21373,#3862);
#3082=LINE('',#21377,#3863);
#3083=LINE('',#21380,#3864);
#3084=LINE('',#21383,#3865);
#3085=LINE('',#21384,#3866);
#3086=LINE('',#21565,#3867);
#3087=LINE('',#21576,#3868);
#3088=LINE('',#21582,#3869);
#3089=LINE('',#21585,#3870);
#3090=LINE('',#21924,#3871);
#3091=LINE('',#21927,#3872);
#3092=LINE('',#22396,#3873);
#3093=LINE('',#22413,#3874);
#3094=LINE('',#22415,#3875);
#3095=LINE('',#22660,#3876);
#3096=LINE('',#22661,#3877);
#3097=LINE('',#22666,#3878);
#3098=LINE('',#22667,#3879);
#3099=LINE('',#22688,#3880);
#3100=LINE('',#22691,#3881);
#3101=LINE('',#22692,#3882);
#3102=LINE('',#22694,#3883);
#3103=LINE('',#22695,#3884);
#3104=LINE('',#22699,#3885);
#3105=LINE('',#22707,#3886);
#3106=LINE('',#22711,#3887);
#3107=LINE('',#22713,#3888);
#3108=LINE('',#22778,#3889);
#3109=LINE('',#22890,#3890);
#3110=LINE('',#29035,#3891);
#3111=LINE('',#29132,#3892);
#3112=LINE('',#29136,#3893);
#3113=LINE('',#29281,#3894);
#3114=LINE('',#29431,#3895);
#3115=LINE('',#29576,#3896);
#3116=LINE('',#29578,#3897);
#3117=LINE('',#29582,#3898);
#3118=LINE('',#29583,#3899);
#3119=LINE('',#29586,#3900);
#3120=LINE('',#29590,#3901);
#3121=LINE('',#29613,#3902);
#3122=LINE('',#29614,#3903);
#3123=LINE('',#29634,#3904);
#3124=LINE('',#29638,#3905);
#3125=LINE('',#29641,#3906);
#3126=LINE('',#29644,#3907);
#3127=LINE('',#29645,#3908);
#3128=LINE('',#29654,#3909);
#3129=LINE('',#29658,#3910);
#3130=LINE('',#29664,#3911);
#3131=LINE('',#29665,#3912);
#3132=LINE('',#29666,#3913);
#3133=LINE('',#29682,#3914);
#3134=LINE('',#29707,#3915);
#3135=LINE('',#29711,#3916);
#3136=LINE('',#29713,#3917);
#3137=LINE('',#29714,#3918);
#3138=LINE('',#29717,#3919);
#3139=LINE('',#29721,#3920);
#3140=LINE('',#29724,#3921);
#3141=LINE('',#29728,#3922);
#3142=LINE('',#29743,#3923);
#3143=LINE('',#29744,#3924);
#3144=LINE('',#29746,#3925);
#3145=LINE('',#29751,#3926);
#3146=LINE('',#29776,#3927);
#3147=LINE('',#29780,#3928);
#3148=LINE('',#29784,#3929);
#3149=LINE('',#29796,#3930);
#3150=LINE('',#29809,#3931);
#3151=LINE('',#29813,#3932);
#3152=LINE('',#29817,#3933);
#3153=LINE('',#29821,#3934);
#3154=LINE('',#29825,#3935);
#3155=LINE('',#29838,#3936);
#3156=LINE('',#29849,#3937);
#3157=LINE('',#29860,#3938);
#3158=LINE('',#29871,#3939);
#3159=LINE('',#29875,#3940);
#3160=LINE('',#29879,#3941);
#3161=LINE('',#30019,#3942);
#3162=LINE('',#30021,#3943);
#3163=LINE('',#30034,#3944);
#3164=LINE('',#30047,#3945);
#3165=LINE('',#30049,#3946);
#3166=LINE('',#30051,#3947);
#3167=LINE('',#30052,#3948);
#3168=LINE('',#30053,#3949);
#3169=LINE('',#30056,#3950);
#3170=LINE('',#30126,#3951);
#3171=LINE('',#30242,#3952);
#3172=LINE('',#30245,#3953);
#3173=LINE('',#30247,#3954);
#3174=LINE('',#30248,#3955);
#3175=LINE('',#30252,#3956);
#3176=LINE('',#30264,#3957);
#3177=LINE('',#30384,#3958);
#3178=LINE('',#30393,#3959);
#3179=LINE('',#30397,#3960);
#3180=LINE('',#30577,#3961);
#3181=LINE('',#30579,#3962);
#3182=LINE('',#30581,#3963);
#3183=LINE('',#30582,#3964);
#3184=LINE('',#30835,#3965);
#3185=LINE('',#30848,#3966);
#3186=LINE('',#30861,#3967);
#3187=LINE('',#30865,#3968);
#3188=LINE('',#30874,#3969);
#3189=LINE('',#30890,#3970);
#3190=LINE('',#30904,#3971);
#3191=LINE('',#31183,#3972);
#3192=LINE('',#31188,#3973);
#3193=LINE('',#31416,#3974);
#3194=LINE('',#31422,#3975);
#3195=LINE('',#31827,#3976);
#3196=LINE('',#31839,#3977);
#3197=LINE('',#31841,#3978);
#3198=LINE('',#32095,#3979);
#3199=LINE('',#32097,#3980);
#3200=LINE('',#32101,#3981);
#3201=LINE('',#32257,#3982);
#3202=LINE('',#32259,#3983);
#3203=LINE('',#32303,#3984);
#3204=LINE('',#32305,#3985);
#3205=LINE('',#32312,#3986);
#3206=LINE('',#32314,#3987);
#3207=LINE('',#32317,#3988);
#3208=LINE('',#32319,#3989);
#3209=LINE('',#32329,#3990);
#3210=LINE('',#32337,#3991);
#3211=LINE('',#32339,#3992);
#3212=LINE('',#32341,#3993);
#3213=LINE('',#32401,#3994);
#3214=LINE('',#32473,#3995);
#3215=LINE('',#32476,#3996);
#3216=LINE('',#33193,#3997);
#3217=LINE('',#33692,#3998);
#3218=LINE('',#33695,#3999);
#3219=LINE('',#33697,#4000);
#3220=LINE('',#33698,#4001);
#3221=LINE('',#33712,#4002);
#3222=LINE('',#33716,#4003);
#3223=LINE('',#33721,#4004);
#3224=LINE('',#33722,#4005);
#3225=LINE('',#33825,#4006);
#3226=LINE('',#33871,#4007);
#3227=LINE('',#34755,#4008);
#3228=LINE('',#34757,#4009);
#3229=LINE('',#34759,#4010);
#3230=LINE('',#34760,#4011);
#3231=LINE('',#34764,#4012);
#3232=LINE('',#34766,#4013);
#3233=LINE('',#34768,#4014);
#3234=LINE('',#34769,#4015);
#3235=LINE('',#34773,#4016);
#3236=LINE('',#34775,#4017);
#3237=LINE('',#34777,#4018);
#3238=LINE('',#34778,#4019);
#3239=LINE('',#34910,#4020);
#3240=LINE('',#34913,#4021);
#3241=LINE('',#35045,#4022);
#3242=LINE('',#35048,#4023);
#3243=LINE('',#35051,#4024);
#3244=LINE('',#35055,#4025);
#3245=LINE('',#35058,#4026);
#3246=LINE('',#35062,#4027);
#3247=LINE('',#35151,#4028);
#3248=LINE('',#35152,#4029);
#3249=LINE('',#35155,#4030);
#3250=LINE('',#35251,#4031);
#3251=LINE('',#35252,#4032);
#3252=LINE('',#35256,#4033);
#3253=LINE('',#35259,#4034);
#3254=LINE('',#35261,#4035);
#3255=LINE('',#35265,#4036);
#3256=LINE('',#35361,#4037);
#3257=LINE('',#35362,#4038);
#3258=LINE('',#35366,#4039);
#3259=LINE('',#35464,#4040);
#3260=LINE('',#35465,#4041);
#3261=LINE('',#35474,#4042);
#3262=LINE('',#35478,#4043);
#3263=LINE('',#35481,#4044);
#3264=LINE('',#35484,#4045);
#3265=LINE('',#35485,#4046);
#3266=LINE('',#35488,#4047);
#3267=LINE('',#35489,#4048);
#3268=LINE('',#35492,#4049);
#3269=LINE('',#35496,#4050);
#3270=LINE('',#35499,#4051);
#3271=LINE('',#35502,#4052);
#3272=LINE('',#35503,#4053);
#3273=LINE('',#35506,#4054);
#3274=LINE('',#35507,#4055);
#3275=LINE('',#35515,#4056);
#3276=LINE('',#35518,#4057);
#3277=LINE('',#35520,#4058);
#3278=LINE('',#35522,#4059);
#3279=LINE('',#35524,#4060);
#3280=LINE('',#35594,#4061);
#3281=LINE('',#35596,#4062);
#3282=LINE('',#35598,#4063);
#3283=LINE('',#35668,#4064);
#3284=LINE('',#35669,#4065);
#3285=LINE('',#35673,#4066);
#3286=LINE('',#35753,#4067);
#3287=LINE('',#35929,#4068);
#3288=LINE('',#35940,#4069);
#3289=LINE('',#35943,#4070);
#3290=LINE('',#36148,#4071);
#3291=LINE('',#36159,#4072);
#3292=LINE('',#36210,#4073);
#3293=LINE('',#36284,#4074);
#3294=LINE('',#36337,#4075);
#3295=LINE('',#36481,#4076);
#3296=LINE('',#36483,#4077);
#3297=LINE('',#36485,#4078);
#3298=LINE('',#36581,#4079);
#3299=LINE('',#36585,#4080);
#3300=LINE('',#36687,#4081);
#3301=LINE('',#36795,#4082);
#3302=LINE('',#36799,#4083);
#3303=LINE('',#36892,#4084);
#3304=LINE('',#36893,#4085);
#3305=LINE('',#36974,#4086);
#3306=LINE('',#37004,#4087);
#3307=LINE('',#37058,#4088);
#3308=LINE('',#37225,#4089);
#3309=LINE('',#37237,#4090);
#3310=LINE('',#37323,#4091);
#3311=LINE('',#37409,#4092);
#3312=LINE('',#37420,#4093);
#3313=LINE('',#37575,#4094);
#3314=LINE('',#37621,#4095);
#3315=LINE('',#37623,#4096);
#3316=LINE('',#37625,#4097);
#3317=LINE('',#37629,#4098);
#3318=LINE('',#37630,#4099);
#3319=LINE('',#37664,#4100);
#3320=LINE('',#37963,#4101);
#3321=LINE('',#37964,#4102);
#3322=LINE('',#37967,#4103);
#3323=LINE('',#37969,#4104);
#3324=LINE('',#37973,#4105);
#3325=LINE('',#37974,#4106);
#3326=LINE('',#38322,#4107);
#3327=LINE('',#38330,#4108);
#3328=LINE('',#38337,#4109);
#3329=LINE('',#38458,#4110);
#3330=LINE('',#38461,#4111);
#3331=LINE('',#38464,#4112);
#3332=LINE('',#38466,#4113);
#3333=LINE('',#38470,#4114);
#3334=LINE('',#38479,#4115);
#3335=LINE('',#38481,#4116);
#3336=LINE('',#38483,#4117);
#3337=LINE('',#38484,#4118);
#3338=LINE('',#38487,#4119);
#3339=LINE('',#38527,#4120);
#3340=LINE('',#38534,#4121);
#3341=LINE('',#38537,#4122);
#3342=LINE('',#38539,#4123);
#3343=LINE('',#38541,#4124);
#3344=LINE('',#38542,#4125);
#3345=LINE('',#38545,#4126);
#3346=LINE('',#38547,#4127);
#3347=LINE('',#38548,#4128);
#3348=LINE('',#38680,#4129);
#3349=LINE('',#38683,#4130);
#3350=LINE('',#38815,#4131);
#3351=LINE('',#38818,#4132);
#3352=LINE('',#38821,#4133);
#3353=LINE('',#38825,#4134);
#3354=LINE('',#38828,#4135);
#3355=LINE('',#38832,#4136);
#3356=LINE('',#38921,#4137);
#3357=LINE('',#38922,#4138);
#3358=LINE('',#38925,#4139);
#3359=LINE('',#39021,#4140);
#3360=LINE('',#39022,#4141);
#3361=LINE('',#39026,#4142);
#3362=LINE('',#39029,#4143);
#3363=LINE('',#39031,#4144);
#3364=LINE('',#39035,#4145);
#3365=LINE('',#39131,#4146);
#3366=LINE('',#39132,#4147);
#3367=LINE('',#39136,#4148);
#3368=LINE('',#39234,#4149);
#3369=LINE('',#39235,#4150);
#3370=LINE('',#39244,#4151);
#3371=LINE('',#39248,#4152);
#3372=LINE('',#39251,#4153);
#3373=LINE('',#39254,#4154);
#3374=LINE('',#39255,#4155);
#3375=LINE('',#39258,#4156);
#3376=LINE('',#39259,#4157);
#3377=LINE('',#39262,#4158);
#3378=LINE('',#39266,#4159);
#3379=LINE('',#39269,#4160);
#3380=LINE('',#39272,#4161);
#3381=LINE('',#39273,#4162);
#3382=LINE('',#39276,#4163);
#3383=LINE('',#39277,#4164);
#3384=LINE('',#39281,#4165);
#3385=LINE('',#39283,#4166);
#3386=LINE('',#39285,#4167);
#3387=LINE('',#39287,#4168);
#3388=LINE('',#39289,#4169);
#3389=LINE('',#39359,#4170);
#3390=LINE('',#39361,#4171);
#3391=LINE('',#39363,#4172);
#3392=LINE('',#39433,#4173);
#3393=LINE('',#39434,#4174);
#3394=LINE('',#39438,#4175);
#3395=LINE('',#39518,#4176);
#3396=LINE('',#39523,#4177);
#3397=LINE('',#39698,#4178);
#3398=LINE('',#39704,#4179);
#3399=LINE('',#39707,#4180);
#3400=LINE('',#39913,#4181);
#3401=LINE('',#39924,#4182);
#3402=LINE('',#39975,#4183);
#3403=LINE('',#40049,#4184);
#3404=LINE('',#40101,#4185);
#3405=LINE('',#40104,#4186);
#3406=LINE('',#40252,#4187);
#3407=LINE('',#40254,#4188);
#3408=LINE('',#40256,#4189);
#3409=LINE('',#40352,#4190);
#3410=LINE('',#40356,#4191);
#3411=LINE('',#40458,#4192);
#3412=LINE('',#40566,#4193);
#3413=LINE('',#40570,#4194);
#3414=LINE('',#40663,#4195);
#3415=LINE('',#40664,#4196);
#3416=LINE('',#40745,#4197);
#3417=LINE('',#40775,#4198);
#3418=LINE('',#40829,#4199);
#3419=LINE('',#40976,#4200);
#3420=LINE('',#40988,#4201);
#3421=LINE('',#41074,#4202);
#3422=LINE('',#41160,#4203);
#3423=LINE('',#41171,#4204);
#3424=LINE('',#41308,#4205);
#3425=LINE('',#41354,#4206);
#3426=LINE('',#41356,#4207);
#3427=LINE('',#41358,#4208);
#3428=LINE('',#41362,#4209);
#3429=LINE('',#41363,#4210);
#3430=LINE('',#41397,#4211);
#3431=LINE('',#41689,#4212);
#3432=LINE('',#41690,#4213);
#3433=LINE('',#41693,#4214);
#3434=LINE('',#41695,#4215);
#3435=LINE('',#41699,#4216);
#3436=LINE('',#41700,#4217);
#3437=LINE('',#42086,#4218);
#3438=LINE('',#42094,#4219);
#3439=LINE('',#42101,#4220);
#3440=LINE('',#42219,#4221);
#3441=LINE('',#42221,#4222);
#3442=LINE('',#42273,#4223);
#3443=LINE('',#42275,#4224);
#3444=LINE('',#42278,#4225);
#3445=LINE('',#42280,#4226);
#3446=LINE('',#42295,#4227);
#3447=LINE('',#42298,#4228);
#3448=LINE('',#42302,#4229);
#3449=LINE('',#42303,#4230);
#3450=LINE('',#42416,#4231);
#3451=LINE('',#42421,#4232);
#3452=LINE('',#42423,#4233);
#3453=LINE('',#42427,#4234);
#3454=LINE('',#42432,#4235);
#3455=LINE('',#42559,#4236);
#3456=LINE('',#42609,#4237);
#3457=LINE('',#42611,#4238);
#3458=LINE('',#42628,#4239);
#3459=LINE('',#42630,#4240);
#3460=LINE('',#42723,#4241);
#3461=LINE('',#42727,#4242);
#3462=LINE('',#42731,#4243);
#3463=LINE('',#42733,#4244);
#3464=LINE('',#42736,#4245);
#3465=LINE('',#42742,#4246);
#3466=LINE('',#42782,#4247);
#3467=LINE('',#43667,#4248);
#3468=LINE('',#44021,#4249);
#3469=LINE('',#44160,#4250);
#3470=LINE('',#44162,#4251);
#3471=LINE('',#44163,#4252);
#3472=LINE('',#44172,#4253);
#3473=LINE('',#44181,#4254);
#3474=LINE('',#44183,#4255);
#3475=LINE('',#44185,#4256);
#3476=LINE('',#44199,#4257);
#3477=LINE('',#44298,#4258);
#3478=LINE('',#45261,#4259);
#3479=LINE('',#45391,#4260);
#3480=LINE('',#45507,#4261);
#3481=LINE('',#45509,#4262);
#3482=LINE('',#45511,#4263);
#3483=LINE('',#45512,#4264);
#3484=LINE('',#45516,#4265);
#3485=LINE('',#45518,#4266);
#3486=LINE('',#45520,#4267);
#3487=LINE('',#45521,#4268);
#3488=LINE('',#45525,#4269);
#3489=LINE('',#45527,#4270);
#3490=LINE('',#45529,#4271);
#3491=LINE('',#45530,#4272);
#3492=LINE('',#45659,#4273);
#3493=LINE('',#45662,#4274);
#3494=LINE('',#45791,#4275);
#3495=LINE('',#45794,#4276);
#3496=LINE('',#45797,#4277);
#3497=LINE('',#45801,#4278);
#3498=LINE('',#45804,#4279);
#3499=LINE('',#45808,#4280);
#3500=LINE('',#45809,#4281);
#3501=LINE('',#45811,#4282);
#3502=LINE('',#45901,#4283);
#3503=LINE('',#45903,#4284);
#3504=LINE('',#45905,#4285);
#3505=LINE('',#46002,#4286);
#3506=LINE('',#46005,#4287);
#3507=LINE('',#46007,#4288);
#3508=LINE('',#46011,#4289);
#3509=LINE('',#46013,#4290);
#3510=LINE('',#46015,#4291);
#3511=LINE('',#46112,#4292);
#3512=LINE('',#46113,#4293);
#3513=LINE('',#46115,#4294);
#3514=LINE('',#46220,#4295);
#3515=LINE('',#46224,#4296);
#3516=LINE('',#46227,#4297);
#3517=LINE('',#46230,#4298);
#3518=LINE('',#46231,#4299);
#3519=LINE('',#46234,#4300);
#3520=LINE('',#46235,#4301);
#3521=LINE('',#46238,#4302);
#3522=LINE('',#46242,#4303);
#3523=LINE('',#46245,#4304);
#3524=LINE('',#46248,#4305);
#3525=LINE('',#46249,#4306);
#3526=LINE('',#46252,#4307);
#3527=LINE('',#46253,#4308);
#3528=LINE('',#46258,#4309);
#3529=LINE('',#46264,#4310);
#3530=LINE('',#46266,#4311);
#3531=LINE('',#46268,#4312);
#3532=LINE('',#46341,#4313);
#3533=LINE('',#46343,#4314);
#3534=LINE('',#46345,#4315);
#3535=LINE('',#46418,#4316);
#3536=LINE('',#46420,#4317);
#3537=LINE('',#46421,#4318);
#3538=LINE('',#46424,#4319);
#3539=LINE('',#46489,#4320);
#3540=LINE('',#46684,#4321);
#3541=LINE('',#46693,#4322);
#3542=LINE('',#46696,#4323);
#3543=LINE('',#46912,#4324);
#3544=LINE('',#46925,#4325);
#3545=LINE('',#46967,#4326);
#3546=LINE('',#47046,#4327);
#3547=LINE('',#47103,#4328);
#3548=LINE('',#47248,#4329);
#3549=LINE('',#47263,#4330);
#3550=LINE('',#47264,#4331);
#3551=LINE('',#47366,#4332);
#3552=LINE('',#47370,#4333);
#3553=LINE('',#47459,#4334);
#3554=LINE('',#47461,#4335);
#3555=LINE('',#47467,#4336);
#3556=LINE('',#47472,#4337);
#3557=LINE('',#47474,#4338);
#3558=LINE('',#47555,#4339);
#3559=LINE('',#47560,#4340);
#3560=LINE('',#47562,#4341);
#3561=LINE('',#47564,#4342);
#3562=LINE('',#47657,#4343);
#3563=LINE('',#47661,#4344);
#3564=LINE('',#47769,#4345);
#3565=LINE('',#47871,#4346);
#3566=LINE('',#47875,#4347);
#3567=LINE('',#47971,#4348);
#3568=LINE('',#47972,#4349);
#3569=LINE('',#48082,#4350);
#3570=LINE('',#48522,#4351);
#3571=LINE('',#48556,#4352);
#3572=LINE('',#48558,#4353);
#3573=LINE('',#48560,#4354);
#3574=LINE('',#48564,#4355);
#3575=LINE('',#48565,#4356);
#3576=LINE('',#48881,#4357);
#3577=LINE('',#48884,#4358);
#3578=LINE('',#48886,#4359);
#3579=LINE('',#48888,#4360);
#3580=LINE('',#48891,#4361);
#3581=LINE('',#49228,#4362);
#3582=LINE('',#49232,#4363);
#3583=LINE('',#49236,#4364);
#3584=LINE('',#49358,#4365);
#3585=LINE('',#49361,#4366);
#3586=LINE('',#49364,#4367);
#3587=LINE('',#49368,#4368);
#3588=LINE('',#49371,#4369);
#3589=LINE('',#49374,#4370);
#3590=LINE('',#49382,#4371);
#3591=LINE('',#49383,#4372);
#3592=LINE('',#49386,#4373);
#3593=LINE('',#49446,#4374);
#3594=LINE('',#49448,#4375);
#3595=LINE('',#49451,#4376);
#3596=LINE('',#49453,#4377);
#3597=LINE('',#49455,#4378);
#3598=LINE('',#49456,#4379);
#3599=LINE('',#49459,#4380);
#3600=LINE('',#49461,#4381);
#3601=LINE('',#49462,#4382);
#3602=LINE('',#49591,#4383);
#3603=LINE('',#49594,#4384);
#3604=LINE('',#49723,#4385);
#3605=LINE('',#49726,#4386);
#3606=LINE('',#49729,#4387);
#3607=LINE('',#49733,#4388);
#3608=LINE('',#49736,#4389);
#3609=LINE('',#49740,#4390);
#3610=LINE('',#49741,#4391);
#3611=LINE('',#49743,#4392);
#3612=LINE('',#49833,#4393);
#3613=LINE('',#49835,#4394);
#3614=LINE('',#49837,#4395);
#3615=LINE('',#49934,#4396);
#3616=LINE('',#49937,#4397);
#3617=LINE('',#49939,#4398);
#3618=LINE('',#49943,#4399);
#3619=LINE('',#49945,#4400);
#3620=LINE('',#49947,#4401);
#3621=LINE('',#50044,#4402);
#3622=LINE('',#50045,#4403);
#3623=LINE('',#50047,#4404);
#3624=LINE('',#50152,#4405);
#3625=LINE('',#50156,#4406);
#3626=LINE('',#50159,#4407);
#3627=LINE('',#50162,#4408);
#3628=LINE('',#50163,#4409);
#3629=LINE('',#50166,#4410);
#3630=LINE('',#50167,#4411);
#3631=LINE('',#50170,#4412);
#3632=LINE('',#50174,#4413);
#3633=LINE('',#50177,#4414);
#3634=LINE('',#50180,#4415);
#3635=LINE('',#50181,#4416);
#3636=LINE('',#50184,#4417);
#3637=LINE('',#50185,#4418);
#3638=LINE('',#50189,#4419);
#3639=LINE('',#50191,#4420);
#3640=LINE('',#50193,#4421);
#3641=LINE('',#50266,#4422);
#3642=LINE('',#50268,#4423);
#3643=LINE('',#50270,#4424);
#3644=LINE('',#50343,#4425);
#3645=LINE('',#50345,#4426);
#3646=LINE('',#50347,#4427);
#3647=LINE('',#50348,#4428);
#3648=LINE('',#50351,#4429);
#3649=LINE('',#50416,#4430);
#3650=LINE('',#50545,#4431);
#3651=LINE('',#50615,#4432);
#3652=LINE('',#50619,#4433);
#3653=LINE('',#50622,#4434);
#3654=LINE('',#50839,#4435);
#3655=LINE('',#50852,#4436);
#3656=LINE('',#50894,#4437);
#3657=LINE('',#50973,#4438);
#3658=LINE('',#51030,#4439);
#3659=LINE('',#51033,#4440);
#3660=LINE('',#51181,#4441);
#3661=LINE('',#51183,#4442);
#3662=LINE('',#51185,#4443);
#3663=LINE('',#51278,#4444);
#3664=LINE('',#51282,#4445);
#3665=LINE('',#51390,#4446);
#3666=LINE('',#51492,#4447);
#3667=LINE('',#51496,#4448);
#3668=LINE('',#51592,#4449);
#3669=LINE('',#51593,#4450);
#3670=LINE('',#51674,#4451);
#3671=LINE('',#51706,#4452);
#3672=LINE('',#51737,#4453);
#3673=LINE('',#51877,#4454);
#3674=LINE('',#51884,#4455);
#3675=LINE('',#52006,#4456);
#3676=LINE('',#52084,#4457);
#3677=LINE('',#52089,#4458);
#3678=LINE('',#52239,#4459);
#3679=LINE('',#52275,#4460);
#3680=LINE('',#52277,#4461);
#3681=LINE('',#52279,#4462);
#3682=LINE('',#52283,#4463);
#3683=LINE('',#52284,#4464);
#3684=LINE('',#52330,#4465);
#3685=LINE('',#52599,#4466);
#3686=LINE('',#52600,#4467);
#3687=LINE('',#52603,#4468);
#3688=LINE('',#52605,#4469);
#3689=LINE('',#52607,#4470);
#3690=LINE('',#52610,#4471);
#3691=LINE('',#52980,#4472);
#3692=LINE('',#52984,#4473);
#3693=LINE('',#52988,#4474);
#3694=LINE('',#53107,#4475);
#3695=LINE('',#53109,#4476);
#3696=LINE('',#53205,#4477);
#3697=LINE('',#53213,#4478);
#3698=LINE('',#53345,#4479);
#3699=LINE('',#53476,#4480);
#3700=LINE('',#53480,#4481);
#3701=LINE('',#53488,#4482);
#3702=LINE('',#53496,#4483);
#3703=LINE('',#53505,#4484);
#3704=LINE('',#53508,#4485);
#3705=LINE('',#53510,#4486);
#3706=LINE('',#53627,#4487);
#3707=LINE('',#53750,#4488);
#3708=LINE('',#53752,#4489);
#3709=LINE('',#53753,#4490);
#3710=LINE('',#53930,#4491);
#3711=LINE('',#53932,#4492);
#3712=LINE('',#53934,#4493);
#3713=LINE('',#53935,#4494);
#3714=LINE('',#54635,#4495);
#3715=LINE('',#54638,#4496);
#3716=LINE('',#54641,#4497);
#3717=LINE('',#54643,#4498);
#3718=LINE('',#54644,#4499);
#3719=LINE('',#54650,#4500);
#3720=LINE('',#54653,#4501);
#3721=LINE('',#54655,#4502);
#3722=LINE('',#54656,#4503);
#3723=LINE('',#54660,#4504);
#3724=LINE('',#54664,#4505);
#3725=LINE('',#54670,#4506);
#3726=LINE('',#54673,#4507);
#3727=LINE('',#54678,#4508);
#3728=LINE('',#54694,#4509);
#3729=LINE('',#54697,#4510);
#3730=LINE('',#54703,#4511);
#3731=LINE('',#54723,#4512);
#3732=LINE('',#54735,#4513);
#3733=LINE('',#54748,#4514);
#3734=LINE('',#55085,#4515);
#3735=LINE('',#55194,#4516);
#3736=LINE('',#55197,#4517);
#3737=LINE('',#55523,#4518);
#3738=LINE('',#56007,#4519);
#3739=LINE('',#56446,#4520);
#3740=LINE('',#62696,#4521);
#3741=LINE('',#62699,#4522);
#3742=VECTOR('',#15219,10.);
#3743=VECTOR('',#15234,1000.);
#3744=VECTOR('',#15237,1000.);
#3745=VECTOR('',#15242,1000.);
#3746=VECTOR('',#15243,1000.);
#3747=VECTOR('',#15244,1000.);
#3748=VECTOR('',#15247,1000.);
#3749=VECTOR('',#15254,1000.);
#3750=VECTOR('',#15257,1000.);
#3751=VECTOR('',#15260,1000.);
#3752=VECTOR('',#15263,1000.);
#3753=VECTOR('',#15266,1000.);
#3754=VECTOR('',#15269,1000.);
#3755=VECTOR('',#15274,1000.);
#3756=VECTOR('',#15275,1000.);
#3757=VECTOR('',#15276,1000.);
#3758=VECTOR('',#15277,1000.);
#3759=VECTOR('',#15278,1000.);
#3760=VECTOR('',#15279,1000.);
#3761=VECTOR('',#15280,1000.);
#3762=VECTOR('',#15281,1000.);
#3763=VECTOR('',#15282,1000.);
#3764=VECTOR('',#15285,1000.);
#3765=VECTOR('',#15292,1000.);
#3766=VECTOR('',#15295,1000.);
#3767=VECTOR('',#15300,1000.);
#3768=VECTOR('',#15301,1000.);
#3769=VECTOR('',#15302,1000.);
#3770=VECTOR('',#15303,1000.);
#3771=VECTOR('',#15304,1000.);
#3772=VECTOR('',#15305,1000.);
#3773=VECTOR('',#15308,1000.);
#3774=VECTOR('',#15311,1000.);
#3775=VECTOR('',#15312,1000.);
#3776=VECTOR('',#15315,1000.);
#3777=VECTOR('',#15316,1000.);
#3778=VECTOR('',#15317,1000.);
#3779=VECTOR('',#15318,1000.);
#3780=VECTOR('',#15319,1000.);
#3781=VECTOR('',#15320,1000.);
#3782=VECTOR('',#15321,1000.);
#3783=VECTOR('',#15322,1000.);
#3784=VECTOR('',#15323,1000.);
#3785=VECTOR('',#15326,1000.);
#3786=VECTOR('',#15329,1000.);
#3787=VECTOR('',#15332,1000.);
#3788=VECTOR('',#15333,1000.);
#3789=VECTOR('',#15334,1000.);
#3790=VECTOR('',#15337,1000.);
#3791=VECTOR('',#15340,1000.);
#3792=VECTOR('',#15341,1000.);
#3793=VECTOR('',#15342,1000.);
#3794=VECTOR('',#15343,1000.);
#3795=VECTOR('',#15344,1000.);
#3796=VECTOR('',#15345,1000.);
#3797=VECTOR('',#15346,1000.);
#3798=VECTOR('',#15349,1000.);
#3799=VECTOR('',#15356,1000.);
#3800=VECTOR('',#15357,1000.);
#3801=VECTOR('',#15358,1000.);
#3802=VECTOR('',#15361,1000.);
#3803=VECTOR('',#15368,1000.);
#3804=VECTOR('',#15371,1000.);
#3805=VECTOR('',#15372,1000.);
#3806=VECTOR('',#15373,1000.);
#3807=VECTOR('',#15374,1000.);
#3808=VECTOR('',#15375,1000.);
#3809=VECTOR('',#15376,1000.);
#3810=VECTOR('',#15377,1000.);
#3811=VECTOR('',#15378,1000.);
#3812=VECTOR('',#15379,1000.);
#3813=VECTOR('',#15380,1000.);
#3814=VECTOR('',#15381,1000.);
#3815=VECTOR('',#15382,1000.);
#3816=VECTOR('',#15385,1000.);
#3817=VECTOR('',#15390,1000.);
#3818=VECTOR('',#15395,1000.);
#3819=VECTOR('',#15402,1000.);
#3820=VECTOR('',#15403,1000.);
#3821=VECTOR('',#15406,1000.);
#3822=VECTOR('',#15409,1000.);
#3823=VECTOR('',#15410,1000.);
#3824=VECTOR('',#15411,1000.);
#3825=VECTOR('',#15412,1000.);
#3826=VECTOR('',#15413,1000.);
#3827=VECTOR('',#15416,1000.);
#3828=VECTOR('',#15417,1000.);
#3829=VECTOR('',#15418,1000.);
#3830=VECTOR('',#15419,1000.);
#3831=VECTOR('',#15420,1000.);
#3832=VECTOR('',#15421,1000.);
#3833=VECTOR('',#15422,1000.);
#3834=VECTOR('',#15423,1000.);
#3835=VECTOR('',#15426,1000.);
#3836=VECTOR('',#15427,1000.);
#3837=VECTOR('',#15428,1000.);
#3838=VECTOR('',#15429,1000.);
#3839=VECTOR('',#15442,1000.);
#3840=VECTOR('',#15443,1000.);
#3841=VECTOR('',#15448,1000.);
#3842=VECTOR('',#15449,1000.);
#3843=VECTOR('',#15454,1000.);
#3844=VECTOR('',#15455,1000.);
#3845=VECTOR('',#15456,1000.);
#3846=VECTOR('',#15457,1000.);
#3847=VECTOR('',#15458,1000.);
#3848=VECTOR('',#15459,1000.);
#3849=VECTOR('',#15460,1000.);
#3850=VECTOR('',#15461,1000.);
#3851=VECTOR('',#15464,1000.);
#3852=VECTOR('',#15469,1000.);
#3853=VECTOR('',#15472,1000.);
#3854=VECTOR('',#15475,1000.);
#3855=VECTOR('',#15476,1000.);
#3856=VECTOR('',#15479,1000.);
#3857=VECTOR('',#15484,1000.);
#3858=VECTOR('',#15485,1000.);
#3859=VECTOR('',#15490,1000.);
#3860=VECTOR('',#15493,1000.);
#3861=VECTOR('',#15504,1000.);
#3862=VECTOR('',#15511,1000.);
#3863=VECTOR('',#15516,1000.);
#3864=VECTOR('',#15519,1000.);
#3865=VECTOR('',#15522,1000.);
#3866=VECTOR('',#15523,1000.);
#3867=VECTOR('',#15534,1000.);
#3868=VECTOR('',#15537,1000.);
#3869=VECTOR('',#15544,1000.);
#3870=VECTOR('',#15547,1000.);
#3871=VECTOR('',#15550,1000.);
#3872=VECTOR('',#15553,1000.);
#3873=VECTOR('',#15564,1000.);
#3874=VECTOR('',#15569,1000.);
#3875=VECTOR('',#15570,1000.);
#3876=VECTOR('',#15635,1000.);
#3877=VECTOR('',#15636,1000.);
#3878=VECTOR('',#15641,1000.);
#3879=VECTOR('',#15642,1000.);
#3880=VECTOR('',#15677,1000.);
#3881=VECTOR('',#15680,1000.);
#3882=VECTOR('',#15681,1000.);
#3883=VECTOR('',#15684,1000.);
#3884=VECTOR('',#15685,1000.);
#3885=VECTOR('',#15690,1000.);
#3886=VECTOR('',#15701,1000.);
#3887=VECTOR('',#15706,1000.);
#3888=VECTOR('',#15709,1000.);
#3889=VECTOR('',#15716,1000.);
#3890=VECTOR('',#15717,1000.);
#3891=VECTOR('',#15740,14.2);
#3892=VECTOR('',#15751,6.35);
#3893=VECTOR('',#15756,1000.);
#3894=VECTOR('',#15759,1000.);
#3895=VECTOR('',#15764,1000.);
#3896=VECTOR('',#15767,1000.);
#3897=VECTOR('',#15768,1000.);
#3898=VECTOR('',#15773,1000.);
#3899=VECTOR('',#15774,1000.);
#3900=VECTOR('',#15777,1000.);
#3901=VECTOR('',#15782,1000.);
#3902=VECTOR('',#15797,1000.);
#3903=VECTOR('',#15798,1000.);
#3904=VECTOR('',#15813,1000.);
#3905=VECTOR('',#15818,1000.);
#3906=VECTOR('',#15821,1000.);
#3907=VECTOR('',#15824,1000.);
#3908=VECTOR('',#15825,1000.);
#3909=VECTOR('',#15838,1000.);
#3910=VECTOR('',#15841,1000.);
#3911=VECTOR('',#15848,1000.);
#3912=VECTOR('',#15849,1000.);
#3913=VECTOR('',#15850,1000.);
#3914=VECTOR('',#15875,1000.);
#3915=VECTOR('',#15908,1000.);
#3916=VECTOR('',#15913,1000.);
#3917=VECTOR('',#15914,1000.);
#3918=VECTOR('',#15915,1000.);
#3919=VECTOR('',#15918,1000.);
#3920=VECTOR('',#15923,1000.);
#3921=VECTOR('',#15926,1000.);
#3922=VECTOR('',#15931,1000.);
#3923=VECTOR('',#15960,1000.);
#3924=VECTOR('',#15961,1000.);
#3925=VECTOR('',#15964,1000.);
#3926=VECTOR('',#15969,1000.);
#3927=VECTOR('',#15974,1000.);
#3928=VECTOR('',#15977,1000.);
#3929=VECTOR('',#15980,1000.);
#3930=VECTOR('',#15981,1000.);
#3931=VECTOR('',#15982,1000.);
#3932=VECTOR('',#15985,1000.);
#3933=VECTOR('',#15988,1000.);
#3934=VECTOR('',#15991,1000.);
#3935=VECTOR('',#15994,1000.);
#3936=VECTOR('',#15995,1000.);
#3937=VECTOR('',#15996,1000.);
#3938=VECTOR('',#15997,1000.);
#3939=VECTOR('',#15998,1000.);
#3940=VECTOR('',#16001,1000.);
#3941=VECTOR('',#16006,1000.);
#3942=VECTOR('',#16009,1000.);
#3943=VECTOR('',#16010,1000.);
#3944=VECTOR('',#16011,1000.);
#3945=VECTOR('',#16012,1000.);
#3946=VECTOR('',#16013,1000.);
#3947=VECTOR('',#16014,1000.);
#3948=VECTOR('',#16015,1000.);
#3949=VECTOR('',#16016,1000.);
#3950=VECTOR('',#16019,1000.);
#3951=VECTOR('',#16020,1000.);
#3952=VECTOR('',#16021,1000.);
#3953=VECTOR('',#16024,1000.);
#3954=VECTOR('',#16025,1000.);
#3955=VECTOR('',#16026,1000.);
#3956=VECTOR('',#16029,1000.);
#3957=VECTOR('',#16032,1000.);
#3958=VECTOR('',#16039,1000.);
#3959=VECTOR('',#16048,1000.);
#3960=VECTOR('',#16053,1000.);
#3961=VECTOR('',#16058,1000.);
#3962=VECTOR('',#16059,1000.);
#3963=VECTOR('',#16060,1000.);
#3964=VECTOR('',#16061,1000.);
#3965=VECTOR('',#16064,1000.);
#3966=VECTOR('',#16065,1000.);
#3967=VECTOR('',#16066,1000.);
#3968=VECTOR('',#16069,1000.);
#3969=VECTOR('',#16070,1000.);
#3970=VECTOR('',#16071,1000.);
#3971=VECTOR('',#16076,1000.);
#3972=VECTOR('',#16081,1000.);
#3973=VECTOR('',#16086,1000.);
#3974=VECTOR('',#16091,1000.);
#3975=VECTOR('',#16098,1000.);
#3976=VECTOR('',#16103,1000.);
#3977=VECTOR('',#16108,1000.);
#3978=VECTOR('',#16109,1000.);
#3979=VECTOR('',#16118,1000.);
#3980=VECTOR('',#16119,1000.);
#3981=VECTOR('',#16124,1000.);
#3982=VECTOR('',#16133,1000.);
#3983=VECTOR('',#16134,1000.);
#3984=VECTOR('',#16137,1000.);
#3985=VECTOR('',#16138,1000.);
#3986=VECTOR('',#16141,1000.);
#3987=VECTOR('',#16144,1000.);
#3988=VECTOR('',#16149,1000.);
#3989=VECTOR('',#16152,1000.);
#3990=VECTOR('',#16157,1000.);
#3991=VECTOR('',#16160,1000.);
#3992=VECTOR('',#16161,1000.);
#3993=VECTOR('',#16162,1000.);
#3994=VECTOR('',#16167,1000.);
#3995=VECTOR('',#16170,1000.);
#3996=VECTOR('',#16173,1000.);
#3997=VECTOR('',#16182,1000.);
#3998=VECTOR('',#16191,1000.);
#3999=VECTOR('',#16194,1000.);
#4000=VECTOR('',#16195,1000.);
#4001=VECTOR('',#16196,1000.);
#4002=VECTOR('',#16199,1000.);
#4003=VECTOR('',#16202,1000.);
#4004=VECTOR('',#16207,1000.);
#4005=VECTOR('',#16208,1000.);
#4006=VECTOR('',#16211,1000.);
#4007=VECTOR('',#16216,1000.);
#4008=VECTOR('',#16231,1000.);
#4009=VECTOR('',#16232,1000.);
#4010=VECTOR('',#16233,1000.);
#4011=VECTOR('',#16234,1000.);
#4012=VECTOR('',#16237,1000.);
#4013=VECTOR('',#16238,1000.);
#4014=VECTOR('',#16239,1000.);
#4015=VECTOR('',#16240,1000.);
#4016=VECTOR('',#16243,1000.);
#4017=VECTOR('',#16244,1000.);
#4018=VECTOR('',#16245,1000.);
#4019=VECTOR('',#16246,1000.);
#4020=VECTOR('',#16249,1000.);
#4021=VECTOR('',#16252,1000.);
#4022=VECTOR('',#16255,1000.);
#4023=VECTOR('',#16258,1000.);
#4024=VECTOR('',#16261,1000.);
#4025=VECTOR('',#16264,1000.);
#4026=VECTOR('',#16267,1000.);
#4027=VECTOR('',#16270,1000.);
#4028=VECTOR('',#16271,1000.);
#4029=VECTOR('',#16272,1000.);
#4030=VECTOR('',#16275,1000.);
#4031=VECTOR('',#16276,1000.);
#4032=VECTOR('',#16277,1000.);
#4033=VECTOR('',#16280,1000.);
#4034=VECTOR('',#16283,1000.);
#4035=VECTOR('',#16284,1000.);
#4036=VECTOR('',#16289,1000.);
#4037=VECTOR('',#16290,1000.);
#4038=VECTOR('',#16291,1000.);
#4039=VECTOR('',#16294,1000.);
#4040=VECTOR('',#16295,1000.);
#4041=VECTOR('',#16296,1000.);
#4042=VECTOR('',#16311,1000.);
#4043=VECTOR('',#16314,1000.);
#4044=VECTOR('',#16317,1000.);
#4045=VECTOR('',#16320,1000.);
#4046=VECTOR('',#16321,1000.);
#4047=VECTOR('',#16324,1000.);
#4048=VECTOR('',#16325,1000.);
#4049=VECTOR('',#16328,1000.);
#4050=VECTOR('',#16331,1000.);
#4051=VECTOR('',#16334,1000.);
#4052=VECTOR('',#16337,1000.);
#4053=VECTOR('',#16338,1000.);
#4054=VECTOR('',#16341,1000.);
#4055=VECTOR('',#16342,1000.);
#4056=VECTOR('',#16353,1000.);
#4057=VECTOR('',#16356,1000.);
#4058=VECTOR('',#16357,1000.);
#4059=VECTOR('',#16358,1000.);
#4060=VECTOR('',#16359,1000.);
#4061=VECTOR('',#16360,1000.);
#4062=VECTOR('',#16361,1000.);
#4063=VECTOR('',#16362,1000.);
#4064=VECTOR('',#16363,1000.);
#4065=VECTOR('',#16364,1000.);
#4066=VECTOR('',#16369,1000.);
#4067=VECTOR('',#16378,1000.);
#4068=VECTOR('',#16387,1000.);
#4069=VECTOR('',#16398,1000.);
#4070=VECTOR('',#16403,1000.);
#4071=VECTOR('',#16418,1000.);
#4072=VECTOR('',#16425,1000.);
#4073=VECTOR('',#16432,1000.);
#4074=VECTOR('',#16441,1000.);
#4075=VECTOR('',#16450,1000.);
#4076=VECTOR('',#16461,1000.);
#4077=VECTOR('',#16462,1000.);
#4078=VECTOR('',#16463,1000.);
#4079=VECTOR('',#16464,1000.);
#4080=VECTOR('',#16467,1000.);
#4081=VECTOR('',#16468,1000.);
#4082=VECTOR('',#16469,1000.);
#4083=VECTOR('',#16472,1000.);
#4084=VECTOR('',#16473,1000.);
#4085=VECTOR('',#16474,1000.);
#4086=VECTOR('',#16497,1000.);
#4087=VECTOR('',#16502,1000.);
#4088=VECTOR('',#16513,1000.);
#4089=VECTOR('',#16522,1000.);
#4090=VECTOR('',#16535,1000.);
#4091=VECTOR('',#16546,1000.);
#4092=VECTOR('',#16557,1000.);
#4093=VECTOR('',#16570,1000.);
#4094=VECTOR('',#16573,1000.);
#4095=VECTOR('',#16580,1000.);
#4096=VECTOR('',#16581,1000.);
#4097=VECTOR('',#16582,1000.);
#4098=VECTOR('',#16585,1000.);
#4099=VECTOR('',#16586,1000.);
#4100=VECTOR('',#16589,1000.);
#4101=VECTOR('',#16600,1000.);
#4102=VECTOR('',#16601,1000.);
#4103=VECTOR('',#16604,1000.);
#4104=VECTOR('',#16605,1000.);
#4105=VECTOR('',#16608,1000.);
#4106=VECTOR('',#16609,1000.);
#4107=VECTOR('',#16620,1000.);
#4108=VECTOR('',#16621,1000.);
#4109=VECTOR('',#16622,1000.);
#4110=VECTOR('',#16647,1000.);
#4111=VECTOR('',#16650,1000.);
#4112=VECTOR('',#16653,1000.);
#4113=VECTOR('',#16654,1000.);
#4114=VECTOR('',#16657,1000.);
#4115=VECTOR('',#16662,10.);
#4116=VECTOR('',#16665,10.);
#4117=VECTOR('',#16666,1000.);
#4118=VECTOR('',#16667,1000.);
#4119=VECTOR('',#16670,1000.);
#4120=VECTOR('',#16673,1000.);
#4121=VECTOR('',#16676,1000.);
#4122=VECTOR('',#16679,1000.);
#4123=VECTOR('',#16680,1000.);
#4124=VECTOR('',#16681,1000.);
#4125=VECTOR('',#16682,1000.);
#4126=VECTOR('',#16685,1000.);
#4127=VECTOR('',#16686,1000.);
#4128=VECTOR('',#16687,1000.);
#4129=VECTOR('',#16690,1000.);
#4130=VECTOR('',#16693,1000.);
#4131=VECTOR('',#16696,1000.);
#4132=VECTOR('',#16699,1000.);
#4133=VECTOR('',#16702,1000.);
#4134=VECTOR('',#16705,1000.);
#4135=VECTOR('',#16708,1000.);
#4136=VECTOR('',#16711,1000.);
#4137=VECTOR('',#16712,1000.);
#4138=VECTOR('',#16713,1000.);
#4139=VECTOR('',#16716,1000.);
#4140=VECTOR('',#16717,1000.);
#4141=VECTOR('',#16718,1000.);
#4142=VECTOR('',#16721,1000.);
#4143=VECTOR('',#16724,1000.);
#4144=VECTOR('',#16725,1000.);
#4145=VECTOR('',#16730,1000.);
#4146=VECTOR('',#16731,1000.);
#4147=VECTOR('',#16732,1000.);
#4148=VECTOR('',#16735,1000.);
#4149=VECTOR('',#16736,1000.);
#4150=VECTOR('',#16737,1000.);
#4151=VECTOR('',#16752,1000.);
#4152=VECTOR('',#16755,1000.);
#4153=VECTOR('',#16758,1000.);
#4154=VECTOR('',#16761,1000.);
#4155=VECTOR('',#16762,1000.);
#4156=VECTOR('',#16765,1000.);
#4157=VECTOR('',#16766,1000.);
#4158=VECTOR('',#16769,1000.);
#4159=VECTOR('',#16772,1000.);
#4160=VECTOR('',#16775,1000.);
#4161=VECTOR('',#16778,1000.);
#4162=VECTOR('',#16779,1000.);
#4163=VECTOR('',#16782,1000.);
#4164=VECTOR('',#16783,1000.);
#4165=VECTOR('',#16786,1000.);
#4166=VECTOR('',#16787,1000.);
#4167=VECTOR('',#16788,1000.);
#4168=VECTOR('',#16789,1000.);
#4169=VECTOR('',#16790,1000.);
#4170=VECTOR('',#16791,1000.);
#4171=VECTOR('',#16792,1000.);
#4172=VECTOR('',#16793,1000.);
#4173=VECTOR('',#16794,1000.);
#4174=VECTOR('',#16795,1000.);
#4175=VECTOR('',#16800,1000.);
#4176=VECTOR('',#16809,1000.);
#4177=VECTOR('',#16814,1000.);
#4178=VECTOR('',#16821,1000.);
#4179=VECTOR('',#16830,1000.);
#4180=VECTOR('',#16835,1000.);
#4181=VECTOR('',#16852,1000.);
#4182=VECTOR('',#16859,1000.);
#4183=VECTOR('',#16866,1000.);
#4184=VECTOR('',#16875,1000.);
#4185=VECTOR('',#16882,1000.);
#4186=VECTOR('',#16885,1000.);
#4187=VECTOR('',#16896,1000.);
#4188=VECTOR('',#16897,1000.);
#4189=VECTOR('',#16898,1000.);
#4190=VECTOR('',#16899,1000.);
#4191=VECTOR('',#16902,1000.);
#4192=VECTOR('',#16903,1000.);
#4193=VECTOR('',#16904,1000.);
#4194=VECTOR('',#16907,1000.);
#4195=VECTOR('',#16908,1000.);
#4196=VECTOR('',#16909,1000.);
#4197=VECTOR('',#16932,1000.);
#4198=VECTOR('',#16937,1000.);
#4199=VECTOR('',#16948,1000.);
#4200=VECTOR('',#16957,1000.);
#4201=VECTOR('',#16970,1000.);
#4202=VECTOR('',#16981,1000.);
#4203=VECTOR('',#16992,1000.);
#4204=VECTOR('',#17005,1000.);
#4205=VECTOR('',#17008,1000.);
#4206=VECTOR('',#17015,1000.);
#4207=VECTOR('',#17016,1000.);
#4208=VECTOR('',#17017,1000.);
#4209=VECTOR('',#17020,1000.);
#4210=VECTOR('',#17021,1000.);
#4211=VECTOR('',#17024,1000.);
#4212=VECTOR('',#17035,1000.);
#4213=VECTOR('',#17036,1000.);
#4214=VECTOR('',#17039,1000.);
#4215=VECTOR('',#17040,1000.);
#4216=VECTOR('',#17043,1000.);
#4217=VECTOR('',#17044,1000.);
#4218=VECTOR('',#17055,1000.);
#4219=VECTOR('',#17056,1000.);
#4220=VECTOR('',#17057,1000.);
#4221=VECTOR('',#17082,1000.);
#4222=VECTOR('',#17085,1000.);
#4223=VECTOR('',#17096,1000.);
#4224=VECTOR('',#17099,1000.);
#4225=VECTOR('',#17104,1000.);
#4226=VECTOR('',#17107,1000.);
#4227=VECTOR('',#17112,1000.);
#4228=VECTOR('',#17115,1000.);
#4229=VECTOR('',#17118,1000.);
#4230=VECTOR('',#17119,1000.);
#4231=VECTOR('',#17122,1000.);
#4232=VECTOR('',#17127,1000.);
#4233=VECTOR('',#17128,1000.);
#4234=VECTOR('',#17131,1000.);
#4235=VECTOR('',#17136,1000.);
#4236=VECTOR('',#17139,1000.);
#4237=VECTOR('',#17144,1000.);
#4238=VECTOR('',#17145,1000.);
#4239=VECTOR('',#17146,1000.);
#4240=VECTOR('',#17147,1000.);
#4241=VECTOR('',#17148,1000.);
#4242=VECTOR('',#17151,1000.);
#4243=VECTOR('',#17154,1000.);
#4244=VECTOR('',#17155,1000.);
#4245=VECTOR('',#17158,1000.);
#4246=VECTOR('',#17165,1000.);
#4247=VECTOR('',#17166,1000.);
#4248=VECTOR('',#17177,1000.);
#4249=VECTOR('',#17186,1000.);
#4250=VECTOR('',#17189,1000.);
#4251=VECTOR('',#17190,1000.);
#4252=VECTOR('',#17191,1000.);
#4253=VECTOR('',#17194,1000.);
#4254=VECTOR('',#17197,1000.);
#4255=VECTOR('',#17198,1000.);
#4256=VECTOR('',#17199,1000.);
#4257=VECTOR('',#17206,1000.);
#4258=VECTOR('',#17211,1000.);
#4259=VECTOR('',#17226,1000.);
#4260=VECTOR('',#17231,1000.);
#4261=VECTOR('',#17236,1000.);
#4262=VECTOR('',#17237,1000.);
#4263=VECTOR('',#17238,1000.);
#4264=VECTOR('',#17239,1000.);
#4265=VECTOR('',#17242,1000.);
#4266=VECTOR('',#17243,1000.);
#4267=VECTOR('',#17244,1000.);
#4268=VECTOR('',#17245,1000.);
#4269=VECTOR('',#17248,1000.);
#4270=VECTOR('',#17249,1000.);
#4271=VECTOR('',#17250,1000.);
#4272=VECTOR('',#17251,1000.);
#4273=VECTOR('',#17254,1000.);
#4274=VECTOR('',#17257,1000.);
#4275=VECTOR('',#17260,1000.);
#4276=VECTOR('',#17263,1000.);
#4277=VECTOR('',#17266,1000.);
#4278=VECTOR('',#17269,1000.);
#4279=VECTOR('',#17272,1000.);
#4280=VECTOR('',#17275,1000.);
#4281=VECTOR('',#17276,1000.);
#4282=VECTOR('',#17277,1000.);
#4283=VECTOR('',#17280,1000.);
#4284=VECTOR('',#17281,1000.);
#4285=VECTOR('',#17282,1000.);
#4286=VECTOR('',#17285,1000.);
#4287=VECTOR('',#17288,1000.);
#4288=VECTOR('',#17289,1000.);
#4289=VECTOR('',#17294,1000.);
#4290=VECTOR('',#17295,1000.);
#4291=VECTOR('',#17296,1000.);
#4292=VECTOR('',#17299,1000.);
#4293=VECTOR('',#17300,1000.);
#4294=VECTOR('',#17301,1000.);
#4295=VECTOR('',#17316,1000.);
#4296=VECTOR('',#17319,1000.);
#4297=VECTOR('',#17322,1000.);
#4298=VECTOR('',#17325,1000.);
#4299=VECTOR('',#17326,1000.);
#4300=VECTOR('',#17329,1000.);
#4301=VECTOR('',#17330,1000.);
#4302=VECTOR('',#17333,1000.);
#4303=VECTOR('',#17336,1000.);
#4304=VECTOR('',#17339,1000.);
#4305=VECTOR('',#17342,1000.);
#4306=VECTOR('',#17343,1000.);
#4307=VECTOR('',#17346,1000.);
#4308=VECTOR('',#17347,1000.);
#4309=VECTOR('',#17352,1000.);
#4310=VECTOR('',#17361,1000.);
#4311=VECTOR('',#17362,1000.);
#4312=VECTOR('',#17363,1000.);
#4313=VECTOR('',#17364,1000.);
#4314=VECTOR('',#17365,1000.);
#4315=VECTOR('',#17366,1000.);
#4316=VECTOR('',#17367,1000.);
#4317=VECTOR('',#17368,1000.);
#4318=VECTOR('',#17369,1000.);
#4319=VECTOR('',#17372,1000.);
#4320=VECTOR('',#17383,1000.);
#4321=VECTOR('',#17394,1000.);
#4322=VECTOR('',#17401,1000.);
#4323=VECTOR('',#17406,1000.);
#4324=VECTOR('',#17425,1000.);
#4325=VECTOR('',#17428,1000.);
#4326=VECTOR('',#17437,1000.);
#4327=VECTOR('',#17444,1000.);
#4328=VECTOR('',#17453,1000.);
#4329=VECTOR('',#17466,1000.);
#4330=VECTOR('',#17467,1000.);
#4331=VECTOR('',#17468,1000.);
#4332=VECTOR('',#17473,1000.);
#4333=VECTOR('',#17476,1000.);
#4334=VECTOR('',#17477,1000.);
#4335=VECTOR('',#17478,1000.);
#4336=VECTOR('',#17483,1000.);
#4337=VECTOR('',#17488,1000.);
#4338=VECTOR('',#17489,1000.);
#4339=VECTOR('',#17490,1000.);
#4340=VECTOR('',#17495,1000.);
#4341=VECTOR('',#17496,1000.);
#4342=VECTOR('',#17497,1000.);
#4343=VECTOR('',#17498,1000.);
#4344=VECTOR('',#17501,1000.);
#4345=VECTOR('',#17502,1000.);
#4346=VECTOR('',#17503,1000.);
#4347=VECTOR('',#17506,1000.);
#4348=VECTOR('',#17507,1000.);
#4349=VECTOR('',#17508,1000.);
#4350=VECTOR('',#17535,1000.);
#4351=VECTOR('',#17594,1000.);
#4352=VECTOR('',#17599,1000.);
#4353=VECTOR('',#17600,1000.);
#4354=VECTOR('',#17601,1000.);
#4355=VECTOR('',#17604,1000.);
#4356=VECTOR('',#17605,1000.);
#4357=VECTOR('',#17618,1000.);
#4358=VECTOR('',#17621,1000.);
#4359=VECTOR('',#17622,1000.);
#4360=VECTOR('',#17623,1000.);
#4361=VECTOR('',#17626,1000.);
#4362=VECTOR('',#17637,1000.);
#4363=VECTOR('',#17640,1000.);
#4364=VECTOR('',#17643,1000.);
#4365=VECTOR('',#17670,1000.);
#4366=VECTOR('',#17673,1000.);
#4367=VECTOR('',#17676,1000.);
#4368=VECTOR('',#17679,1000.);
#4369=VECTOR('',#17682,1000.);
#4370=VECTOR('',#17685,1000.);
#4371=VECTOR('',#17688,1000.);
#4372=VECTOR('',#17689,1000.);
#4373=VECTOR('',#17692,1000.);
#4374=VECTOR('',#17695,1000.);
#4375=VECTOR('',#17698,1000.);
#4376=VECTOR('',#17701,1000.);
#4377=VECTOR('',#17702,1000.);
#4378=VECTOR('',#17703,1000.);
#4379=VECTOR('',#17704,1000.);
#4380=VECTOR('',#17707,1000.);
#4381=VECTOR('',#17708,1000.);
#4382=VECTOR('',#17709,1000.);
#4383=VECTOR('',#17712,1000.);
#4384=VECTOR('',#17715,1000.);
#4385=VECTOR('',#17718,1000.);
#4386=VECTOR('',#17721,1000.);
#4387=VECTOR('',#17724,1000.);
#4388=VECTOR('',#17727,1000.);
#4389=VECTOR('',#17730,1000.);
#4390=VECTOR('',#17733,1000.);
#4391=VECTOR('',#17734,1000.);
#4392=VECTOR('',#17735,1000.);
#4393=VECTOR('',#17738,1000.);
#4394=VECTOR('',#17739,1000.);
#4395=VECTOR('',#17740,1000.);
#4396=VECTOR('',#17743,1000.);
#4397=VECTOR('',#17746,1000.);
#4398=VECTOR('',#17747,1000.);
#4399=VECTOR('',#17752,1000.);
#4400=VECTOR('',#17753,1000.);
#4401=VECTOR('',#17754,1000.);
#4402=VECTOR('',#17757,1000.);
#4403=VECTOR('',#17758,1000.);
#4404=VECTOR('',#17759,1000.);
#4405=VECTOR('',#17774,1000.);
#4406=VECTOR('',#17777,1000.);
#4407=VECTOR('',#17780,1000.);
#4408=VECTOR('',#17783,1000.);
#4409=VECTOR('',#17784,1000.);
#4410=VECTOR('',#17787,1000.);
#4411=VECTOR('',#17788,1000.);
#4412=VECTOR('',#17791,1000.);
#4413=VECTOR('',#17794,1000.);
#4414=VECTOR('',#17797,1000.);
#4415=VECTOR('',#17800,1000.);
#4416=VECTOR('',#17801,1000.);
#4417=VECTOR('',#17804,1000.);
#4418=VECTOR('',#17805,1000.);
#4419=VECTOR('',#17808,1000.);
#4420=VECTOR('',#17809,1000.);
#4421=VECTOR('',#17810,1000.);
#4422=VECTOR('',#17811,1000.);
#4423=VECTOR('',#17812,1000.);
#4424=VECTOR('',#17813,1000.);
#4425=VECTOR('',#17814,1000.);
#4426=VECTOR('',#17815,1000.);
#4427=VECTOR('',#17816,1000.);
#4428=VECTOR('',#17817,1000.);
#4429=VECTOR('',#17820,1000.);
#4430=VECTOR('',#17831,1000.);
#4431=VECTOR('',#17836,1000.);
#4432=VECTOR('',#17845,1000.);
#4433=VECTOR('',#17850,1000.);
#4434=VECTOR('',#17855,1000.);
#4435=VECTOR('',#17876,1000.);
#4436=VECTOR('',#17879,1000.);
#4437=VECTOR('',#17888,1000.);
#4438=VECTOR('',#17895,1000.);
#4439=VECTOR('',#17904,1000.);
#4440=VECTOR('',#17907,1000.);
#4441=VECTOR('',#17918,1000.);
#4442=VECTOR('',#17919,1000.);
#4443=VECTOR('',#17920,1000.);
#4444=VECTOR('',#17921,1000.);
#4445=VECTOR('',#17924,1000.);
#4446=VECTOR('',#17925,1000.);
#4447=VECTOR('',#17926,1000.);
#4448=VECTOR('',#17929,1000.);
#4449=VECTOR('',#17930,1000.);
#4450=VECTOR('',#17931,1000.);
#4451=VECTOR('',#17954,1000.);
#4452=VECTOR('',#17959,1000.);
#4453=VECTOR('',#17966,1000.);
#4454=VECTOR('',#17983,1000.);
#4455=VECTOR('',#17990,1000.);
#4456=VECTOR('',#17999,1000.);
#4457=VECTOR('',#18018,1000.);
#4458=VECTOR('',#18023,1000.);
#4459=VECTOR('',#18030,1000.);
#4460=VECTOR('',#18037,1000.);
#4461=VECTOR('',#18038,1000.);
#4462=VECTOR('',#18039,1000.);
#4463=VECTOR('',#18042,1000.);
#4464=VECTOR('',#18043,1000.);
#4465=VECTOR('',#18046,1000.);
#4466=VECTOR('',#18057,1000.);
#4467=VECTOR('',#18058,1000.);
#4468=VECTOR('',#18061,1000.);
#4469=VECTOR('',#18062,1000.);
#4470=VECTOR('',#18063,1000.);
#4471=VECTOR('',#18066,1000.);
#4472=VECTOR('',#18077,1000.);
#4473=VECTOR('',#18080,1000.);
#4474=VECTOR('',#18083,1000.);
#4475=VECTOR('',#18110,1000.);
#4476=VECTOR('',#18113,1000.);
#4477=VECTOR('',#18124,1000.);
#4478=VECTOR('',#18127,1000.);
#4479=VECTOR('',#18128,1000.);
#4480=VECTOR('',#18129,1000.);
#4481=VECTOR('',#18132,1000.);
#4482=VECTOR('',#18143,1000.);
#4483=VECTOR('',#18146,1000.);
#4484=VECTOR('',#18147,1000.);
#4485=VECTOR('',#18150,1000.);
#4486=VECTOR('',#18151,1000.);
#4487=VECTOR('',#18152,1000.);
#4488=VECTOR('',#18155,1000.);
#4489=VECTOR('',#18156,1000.);
#4490=VECTOR('',#18157,1000.);
#4491=VECTOR('',#18180,1000.);
#4492=VECTOR('',#18181,1000.);
#4493=VECTOR('',#18182,1000.);
#4494=VECTOR('',#18183,1000.);
#4495=VECTOR('',#18208,1000.);
#4496=VECTOR('',#18211,1000.);
#4497=VECTOR('',#18214,1000.);
#4498=VECTOR('',#18215,1000.);
#4499=VECTOR('',#18216,1000.);
#4500=VECTOR('',#18223,10.);
#4501=VECTOR('',#18226,1000.);
#4502=VECTOR('',#18227,1000.);
#4503=VECTOR('',#18228,1000.);
#4504=VECTOR('',#18231,1000.);
#4505=VECTOR('',#18234,1000.);
#4506=VECTOR('',#18241,1000.);
#4507=VECTOR('',#18244,1000.);
#4508=VECTOR('',#18251,10.);
#4509=VECTOR('',#18260,1000.);
#4510=VECTOR('',#18263,1000.);
#4511=VECTOR('',#18270,1000.);
#4512=VECTOR('',#18277,1000.);
#4513=VECTOR('',#18282,1000.);
#4514=VECTOR('',#18289,10.);
#4515=VECTOR('',#18308,1000.);
#4516=VECTOR('',#18317,1000.);
#4517=VECTOR('',#18320,1000.);
#4518=VECTOR('',#18321,1000.);
#4519=VECTOR('',#18350,12.0149520254966);
#4520=VECTOR('',#18355,11.3029999999997);
#4521=VECTOR('',#18360,17.526);
#4522=VECTOR('',#18363,18.826);
#4523=B_SPLINE_CURVE_WITH_KNOTS('',3,(#18445,#18446,#18447,#18448),
 .UNSPECIFIED.,.F.,.F.,(4,4),(-8.78479045421116E-16,0.999999820977652),
 .UNSPECIFIED.);
#4524=B_SPLINE_CURVE_WITH_KNOTS('',3,(#18450,#18451,#18452,#18453,#18454,
#18455,#18456),.UNSPECIFIED.,.F.,.F.,(4,1,1,1,4),(1.0617179592334E-9,0.25,
0.5,0.75,1.),.UNSPECIFIED.);
#4525=B_SPLINE_CURVE_WITH_KNOTS('',3,(#18458,#18459,#18460,#18461),
 .UNSPECIFIED.,.F.,.F.,(4,4),(2.58873597471648E-16,1.00000592104669),
 .UNSPECIFIED.);
#4526=B_SPLINE_CURVE_WITH_KNOTS('',3,(#18463,#18464,#18465,#18466,#18467,
#18468,#18469,#18470,#18471,#18472,#18473,#18474,#18475,#18476,#18477,#18478,
#18479,#18480,#18481,#18482,#18483,#18484,#18485,#18486,#18487,#18488,#18489,
#18490,#18491,#18492,#18493,#18494,#18495,#18496,#18497,#18498,#18499,#18500,
#18501,#18502,#18503,#18504,#18505,#18506,#18507,#18508),.UNSPECIFIED.,
 .F.,.F.,(4,3,3,3,3,3,3,3,3,3,3,3,3,3,3,4),(2.18996333467819E-5,0.0224840042203136,
0.045739300521271,0.0625,0.0714315918363937,0.0998821762444875,0.125,0.142860643047794,
0.162583389385537,0.182156673872599,0.1875,0.210837484869868,0.214303704315429,
0.237706496559806,0.25,0.250203565256554),.UNSPECIFIED.);
#4527=B_SPLINE_CURVE_WITH_KNOTS('',3,(#18631,#18632,#18633,#18634,#18635,
#18636,#18637,#18638,#18639,#18640,#18641,#18642,#18643,#18644,#18645,#18646,
#18647,#18648,#18649,#18650,#18651,#18652,#18653,#18654,#18655,#18656,#18657,
#18658,#18659,#18660,#18661,#18662,#18663,#18664,#18665,#18666,#18667,#18668,
#18669,#18670,#18671,#18672),.UNSPECIFIED.,.F.,.F.,(4,2,2,2,2,2,2,2,2,2,
2,2,2,2,2,2,2,2,2,2,4),(-10.1266101328543,-9.53539898332412,-8.90897796343673,
-8.55112651248891,-7.83966630334968,-7.47386386939216,-6.79839187612515,
-6.43890568316765,-5.78023479576185,-5.42475144303342,-5.06415779249824,
-4.55564461249187,-4.18672398134551,-4.0039842603927,-3.26627556895574,
-3.00343372339739,-2.24869094541121,-1.49927250659858,-0.857796689907543,
-0.371449893277806,0.),.UNSPECIFIED.);
#4528=B_SPLINE_CURVE_WITH_KNOTS('',3,(#18676,#18677,#18678,#18679,#18680,
#18681,#18682,#18683,#18684,#18685,#18686,#18687,#18688,#18689,#18690,#18691,
#18692,#18693,#18694,#18695,#18696,#18697,#18698,#18699,#18700,#18701,#18702,
#18703,#18704,#18705,#18706,#18707,#18708,#18709,#18710,#18711,#18712,#18713,
#18714,#18715,#18716,#18717,#18718,#18719,#18720,#18721,#18722,#18723,#18724,
#18725,#18726,#18727,#18728,#18729,#18730),.UNSPECIFIED.,.F.,.F.,(4,3,3,
3,3,3,3,3,3,3,3,3,3,3,3,3,3,3,4),(3.00723898344318E-11,0.0564807846770117,
0.114367466034613,0.17312122272359,0.233184155845338,0.25,0.305515861108253,
0.359529728763611,0.411567984743463,0.462392984546291,0.5,0.565220902441758,
0.630120744381287,0.694772534345059,0.759245215616576,0.823577117275374,
0.887890142415631,0.952276851472311,0.999999992621987),.UNSPECIFIED.);
#4529=B_SPLINE_CURVE_WITH_KNOTS('',3,(#18732,#18733,#18734,#18735,#18736,
#18737,#18738,#18739,#18740,#18741,#18742,#18743,#18744,#18745,#18746,#18747),
 .UNSPECIFIED.,.F.,.F.,(4,3,3,3,3,4),(0.,0.234018247576919,0.5,0.735215336529523,
0.94312242009623,0.999999999986911),.UNSPECIFIED.);
#4530=B_SPLINE_CURVE_WITH_KNOTS('',3,(#18749,#18750,#18751,#18752,#18753,
#18754,#18755,#18756,#18757,#18758,#18759,#18760,#18761,#18762,#18763,#18764,
#18765,#18766,#18767,#18768,#18769,#18770,#18771,#18772,#18773,#18774,#18775,
#18776,#18777,#18778,#18779,#18780,#18781,#18782,#18783,#18784,#18785,#18786,
#18787,#18788,#18789,#18790,#18791,#18792,#18793,#18794,#18795,#18796,#18797,
#18798,#18799,#18800,#18801,#18802,#18803,#18804,#18805,#18806,#18807,#18808,
#18809,#18810,#18811,#18812,#18813,#18814,#18815,#18816,#18817,#18818,#18819,
#18820,#18821,#18822,#18823,#18824,#18825,#18826,#18827,#18828,#18829,#18830,
#18831,#18832,#18833,#18834,#18835,#18836,#18837,#18838,#18839,#18840,#18841,
#18842,#18843,#18844,#18845,#18846,#18847,#18848,#18849,#18850,#18851,#18852,
#18853,#18854,#18855,#18856,#18857,#18858,#18859,#18860,#18861,#18862,#18863,
#18864,#18865,#18866,#18867,#18868,#18869,#18870,#18871,#18872,#18873,#18874,
#18875,#18876,#18877,#18878,#18879,#18880,#18881,#18882,#18883,#18884,#18885,
#18886,#18887,#18888,#18889,#18890,#18891,#18892,#18893,#18894,#18895,#18896,
#18897,#18898,#18899,#18900,#18901,#18902,#18903,#18904,#18905,#18906,#18907,
#18908,#18909,#18910,#18911,#18912,#18913,#18914,#18915,#18916,#18917,#18918,
#18919,#18920,#18921,#18922,#18923,#18924,#18925,#18926,#18927,#18928,#18929,
#18930,#18931,#18932,#18933,#18934,#18935,#18936,#18937,#18938,#18939,#18940,
#18941,#18942,#18943,#18944),.UNSPECIFIED.,.F.,.F.,(4,3,3,3,3,3,3,3,3,3,
3,3,3,3,3,3,3,3,3,3,3,3,3,3,3,3,3,3,3,3,3,3,3,3,3,3,3,3,3,3,3,3,3,3,3,3,
3,3,3,3,3,3,3,3,3,3,3,3,3,3,3,3,3,3,3,4),(5.30966652493936E-10,0.000258612206488478,
0.0212217511391431,0.0406752627299821,0.0583373559063888,0.0625,0.0793483291598501,
0.0964338055547463,0.113983979722671,0.125,0.141824779694335,0.145071131327109,
0.16204102181176,0.179509817564397,0.1875,0.204807210171047,0.222506008305885,
0.230954005801598,0.248434589299722,0.25,0.269316826049903,0.288153164785061,
0.30626516919116,0.3125,0.316263280589841,0.338204962871599,0.361798832975717,
0.375,0.391590678437275,0.401173896838804,0.417669201982148,0.421990716883232,
0.4375,0.4666003125016,0.485881218379624,0.5,0.527643264543827,0.555551185004947,
0.5625,0.570559711961466,0.601508881486986,0.625,0.642008661078832,0.655374838670155,
0.672411210904827,0.6875,0.708166168155404,0.727870887616041,0.740516290162954,
0.75,0.771824930985949,0.794705463582977,0.8125,0.826163530560976,0.854047681173141,
0.875,0.890745484674996,0.9061539583322,0.912556985496581,0.927868578299729,
0.9375,0.95291620793427,0.967965716972684,0.982755081022527,0.997186313448607,
0.999164831737078),.UNSPECIFIED.);
#4531=B_SPLINE_CURVE_WITH_KNOTS('',3,(#18946,#18947,#18948,#18949,#18950,
#18951,#18952,#18953,#18954,#18955),.UNSPECIFIED.,.F.,.F.,(4,3,3,4),(0.,
0.499500677148474,0.816459685281186,0.999001354296948),.UNSPECIFIED.);
#4532=B_SPLINE_CURVE_WITH_KNOTS('',3,(#19046,#19047,#19048,#19049,#19050,
#19051,#19052,#19053,#19054,#19055,#19056,#19057,#19058,#19059,#19060,#19061,
#19062,#19063,#19064,#19065,#19066,#19067,#19068,#19069,#19070,#19071,#19072,
#19073,#19074,#19075,#19076,#19077,#19078,#19079,#19080,#19081,#19082),
 .UNSPECIFIED.,.F.,.F.,(4,3,3,3,3,3,3,3,3,3,3,3,4),(1.82357417359645E-9,
0.0877582044977311,0.177663692673636,0.265264975938981,0.349680291403084,
0.429082527814491,0.5,0.603420842688784,0.701060757115136,0.724693716137575,
0.820925761347566,0.914919361438456,1.),.UNSPECIFIED.);
#4533=B_SPLINE_CURVE_WITH_KNOTS('',3,(#19116,#19117,#19118,#19119,#19120,
#19121,#19122,#19123,#19124,#19125),.UNSPECIFIED.,.F.,.F.,(4,2,2,2,4),(-0.00490189294530922,
0.,0.0500747962732157,0.0978170928985042,0.11501727794986),
 .UNSPECIFIED.);
#4534=B_SPLINE_CURVE_WITH_KNOTS('',3,(#19129,#19130,#19131,#19132,#19133,
#19134,#19135,#19136,#19137,#19138),.UNSPECIFIED.,.F.,.F.,(4,2,2,2,4),(4.56448984816843E-8,
0.0081329370494678,0.0549583734661672,0.120139569795374,0.125663809438988),
 .UNSPECIFIED.);
#4535=B_SPLINE_CURVE_WITH_KNOTS('',3,(#19150,#19151,#19152,#19153,#19154),
 .UNSPECIFIED.,.F.,.F.,(4,1,4),(0.,0.5,1.),.UNSPECIFIED.);
#4536=B_SPLINE_CURVE_WITH_KNOTS('',3,(#19174,#19175,#19176,#19177,#19178,
#19179,#19180,#19181,#19182,#19183),.UNSPECIFIED.,.F.,.F.,(4,2,2,2,4),(-0.0935591088847931,
-0.0932691699660774,-0.0521673901225317,-0.0138301226501352,0.),
 .UNSPECIFIED.);
#4537=B_SPLINE_CURVE_WITH_KNOTS('',3,(#19187,#19188,#19189,#19190,#19191,
#19192,#19193,#19194,#19195,#19196),.UNSPECIFIED.,.F.,.F.,(4,2,2,2,4),(-0.124512696126476,
-0.11617010622557,-0.0681654522603712,1.36139266526669E-10,0.000424549638743339),
 .UNSPECIFIED.);
#4538=B_SPLINE_CURVE_WITH_KNOTS('',3,(#19207,#19208,#19209,#19210,#19211,
#19212,#19213,#19214,#19215,#19216,#19217,#19218,#19219,#19220,#19221,#19222,
#19223,#19224,#19225,#19226,#19227,#19228,#19229,#19230,#19231,#19232,#19233,
#19234,#19235,#19236,#19237,#19238,#19239,#19240,#19241,#19242,#19243),
 .UNSPECIFIED.,.F.,.F.,(4,3,3,3,3,3,3,3,3,3,3,3,4),(0.,0.115224327890711,
0.231665661950124,0.343820313771737,0.428172700666816,0.5,0.581148236829879,
0.663580155188787,0.747685116391591,0.826442729148259,0.902679320775194,
0.975236165443405,1.),.UNSPECIFIED.);
#4539=B_SPLINE_CURVE_WITH_KNOTS('',3,(#19252,#19253,#19254,#19255),
 .UNSPECIFIED.,.F.,.F.,(4,4),(2.57895114547833E-7,0.999998950957106),
 .UNSPECIFIED.);
#4540=B_SPLINE_CURVE_WITH_KNOTS('',3,(#19328,#19329,#19330,#19331,#19332,
#19333,#19334,#19335,#19336,#19337,#19338,#19339,#19340,#19341,#19342,#19343,
#19344,#19345,#19346,#19347,#19348,#19349,#19350,#19351,#19352,#19353,#19354,
#19355,#19356,#19357,#19358,#19359,#19360,#19361,#19362,#19363,#19364),
 .UNSPECIFIED.,.F.,.F.,(4,3,3,3,3,3,3,3,3,3,3,3,4),(0.,0.103736327070818,
0.209495399284337,0.275314648182607,0.381711949559932,0.492054921617831,
0.5,0.579891480188585,0.663177293873085,0.752143324458539,0.843072905882125,
0.932542933024596,0.999999999661458),.UNSPECIFIED.);
#4541=B_SPLINE_CURVE_WITH_KNOTS('',3,(#19381,#19382,#19383,#19384,#19385,
#19386,#19387,#19388,#19389,#19390),.UNSPECIFIED.,.F.,.F.,(4,2,2,2,4),(-0.12187013955013,
-0.121456011766242,-0.0549641494523761,-0.00813797523985437,0.),
 .UNSPECIFIED.);
#4542=B_SPLINE_CURVE_WITH_KNOTS('',3,(#19394,#19395,#19396,#19397,#19398,
#19399,#19400,#19401,#19402,#19403),.UNSPECIFIED.,.F.,.F.,(4,2,2,2,4),(-0.138289679297267,
-0.117600040398488,-0.0607004652068021,0.,0.000430753874719996),
 .UNSPECIFIED.);
#4543=B_SPLINE_CURVE_WITH_KNOTS('',3,(#19448,#19449,#19450,#19451,#19452,
#19453,#19454,#19455,#19456,#19457,#19458,#19459,#19460,#19461,#19462,#19463,
#19464,#19465,#19466,#19467,#19468,#19469,#19470,#19471,#19472,#19473,#19474,
#19475,#19476,#19477,#19478,#19479,#19480,#19481,#19482,#19483,#19484,#19485,
#19486,#19487,#19488,#19489,#19490,#19491,#19492,#19493,#19494,#19495,#19496,
#19497,#19498,#19499,#19500,#19501,#19502,#19503,#19504,#19505,#19506,#19507,
#19508,#19509,#19510,#19511,#19512,#19513,#19514,#19515,#19516,#19517,#19518,
#19519,#19520,#19521,#19522,#19523,#19524,#19525,#19526,#19527,#19528,#19529,
#19530,#19531,#19532,#19533,#19534,#19535,#19536,#19537,#19538,#19539,#19540,
#19541,#19542,#19543,#19544,#19545,#19546,#19547,#19548,#19549,#19550,#19551,
#19552,#19553,#19554,#19555,#19556),.UNSPECIFIED.,.F.,.F.,(4,3,3,3,3,3,
3,3,3,3,3,3,3,3,3,3,3,3,3,3,3,3,3,3,3,3,3,3,3,3,3,3,3,3,3,3,4),(0.,0.0289223093946456,
0.0594658286236544,0.0922329143118272,0.125,0.148221877149783,0.173345287956187,
0.1875,0.20454996443018,0.22168822200694,0.237810627531691,0.25,0.267103823918775,
0.283432555895676,0.29940351117302,0.3125,0.33683556364613,0.361966038183204,
0.375,0.403821673570998,0.424737398618794,0.453477232251618,0.481794015918113,
0.5,0.53125,0.560876610407726,0.590335389545519,0.619737923915511,0.625,
0.66622156410468,0.707443128209361,0.74401273718319,0.780293209473132,0.846870057796208,
0.912463671651605,0.976700530414918,1.),.UNSPECIFIED.);
#4544=B_SPLINE_CURVE_WITH_KNOTS('',3,(#19558,#19559,#19560,#19561,#19562,
#19563,#19564,#19565,#19566,#19567,#19568,#19569,#19570,#19571,#19572,#19573,
#19574,#19575,#19576,#19577,#19578,#19579,#19580,#19581,#19582,#19583,#19584,
#19585,#19586,#19587,#19588,#19589,#19590,#19591,#19592,#19593,#19594,#19595,
#19596,#19597,#19598,#19599,#19600,#19601,#19602,#19603,#19604,#19605,#19606,
#19607,#19608,#19609,#19610,#19611,#19612,#19613,#19614,#19615,#19616,#19617,
#19618,#19619,#19620,#19621,#19622,#19623,#19624,#19625,#19626,#19627,#19628,
#19629,#19630,#19631,#19632,#19633,#19634,#19635,#19636,#19637,#19638,#19639,
#19640,#19641,#19642,#19643,#19644,#19645,#19646,#19647,#19648,#19649,#19650,
#19651,#19652,#19653,#19654,#19655,#19656,#19657,#19658,#19659,#19660,#19661,
#19662,#19663,#19664,#19665,#19666,#19667,#19668,#19669),.UNSPECIFIED.,
 .F.,.F.,(4,3,3,3,3,3,3,3,3,3,3,3,3,3,3,3,3,3,3,3,3,3,3,3,3,3,3,3,3,3,3,
3,3,3,3,3,3,4),(5.6138578731069E-11,0.0646676098531822,0.131007669655748,
0.198337066009952,0.245394185539201,0.270075099103178,0.29245130506845,
0.334250907281973,0.375,0.40625,0.436199356355935,0.466317956483584,0.496866979231267,
0.5,0.528776527041076,0.558027950644957,0.574906802960056,0.604316621370169,
0.625,0.650382626971851,0.674946292196543,0.6875,0.703446124065708,0.719541046376993,
0.736674276044212,0.75,0.766168855114303,0.78308240250884,0.800086933324742,
0.8125,0.838027150488357,0.861249431323154,0.875,0.906957364977273,0.937864199587224,
0.968932099793612,0.997464690554666,1.),.UNSPECIFIED.);
#4545=B_SPLINE_CURVE_WITH_KNOTS('',3,(#19670,#19671,#19672,#19673,#19674),
 .UNSPECIFIED.,.F.,.F.,(4,1,4),(0.,0.5,1.),.UNSPECIFIED.);
#4546=B_SPLINE_CURVE_WITH_KNOTS('',3,(#19727,#19728,#19729,#19730,#19731,
#19732,#19733,#19734,#19735,#19736,#19737,#19738,#19739,#19740,#19741,#19742),
 .UNSPECIFIED.,.F.,.F.,(4,3,3,3,3,4),(0.,0.26080898827396,0.428588265788355,
0.5,0.843201996682582,0.999999925523604),.UNSPECIFIED.);
#4547=B_SPLINE_CURVE_WITH_KNOTS('',3,(#19744,#19745,#19746,#19747,#19748,
#19749,#19750,#19751,#19752,#19753,#19754,#19755,#19756,#19757,#19758,#19759,
#19760,#19761,#19762,#19763,#19764,#19765,#19766,#19767,#19768,#19769,#19770,
#19771,#19772,#19773,#19774,#19775,#19776,#19777,#19778,#19779,#19780,#19781,
#19782,#19783,#19784,#19785,#19786,#19787,#19788,#19789,#19790,#19791,#19792,
#19793,#19794,#19795,#19796,#19797,#19798,#19799,#19800,#19801,#19802,#19803,
#19804,#19805,#19806,#19807,#19808,#19809,#19810,#19811,#19812,#19813,#19814,
#19815,#19816,#19817,#19818,#19819,#19820,#19821,#19822,#19823,#19824,#19825,
#19826,#19827,#19828,#19829,#19830,#19831,#19832,#19833,#19834,#19835,#19836,
#19837,#19838,#19839,#19840,#19841,#19842,#19843,#19844,#19845,#19846,#19847,
#19848,#19849,#19850,#19851,#19852,#19853,#19854,#19855,#19856,#19857,#19858,
#19859,#19860,#19861,#19862,#19863,#19864,#19865,#19866,#19867,#19868,#19869,
#19870,#19871,#19872,#19873,#19874,#19875,#19876,#19877,#19878,#19879,#19880,
#19881,#19882,#19883,#19884,#19885,#19886,#19887,#19888,#19889,#19890,#19891,
#19892,#19893,#19894,#19895,#19896,#19897,#19898,#19899,#19900,#19901,#19902,
#19903,#19904,#19905,#19906,#19907,#19908,#19909,#19910,#19911,#19912,#19913,
#19914,#19915,#19916,#19917,#19918,#19919,#19920,#19921,#19922,#19923,#19924,
#19925,#19926,#19927),.UNSPECIFIED.,.F.,.F.,(4,3,3,3,3,3,3,3,3,3,3,3,3,
3,3,3,3,3,3,3,3,3,3,3,3,3,3,3,3,3,3,3,3,3,3,3,3,3,3,3,3,3,3,3,3,3,3,3,3,
3,3,3,3,3,3,3,3,3,3,3,3,4),(0.,0.00079866245150268,0.0295160231511786,0.0595794991552352,
0.0625,0.0939268986815355,0.125,0.160965658205721,0.184092945134795,0.1875,
0.207947470031338,0.21875,0.23045548130214,0.234375,0.242351001648706,0.25,
0.2578125,0.264952145640864,0.265625,0.2758913572788,0.28125,0.30026125714659,
0.3125,0.349860565931615,0.375,0.392397564798244,0.429240082865922,0.4375,
0.456865918311632,0.46875,0.482470971299033,0.495795553743798,0.5,0.513548418322215,
0.526657416272505,0.53125,0.546875,0.5625,0.581030238637106,0.597674407957944,
0.615581549432892,0.625,0.649215153655221,0.673168857342885,0.6875,0.710740744066397,
0.733857260646265,0.75,0.762620124633911,0.774753461445514,0.78125,0.793427115612359,
0.798989545268656,0.810680779589407,0.8125,0.833794957851685,0.854990666991834,
0.875,0.908186063935496,0.940834390578588,0.972877679947545,1.),
 .UNSPECIFIED.);
#4548=B_SPLINE_CURVE_WITH_KNOTS('',3,(#19928,#19929,#19930,#19931,#19932,
#19933,#19934,#19935,#19936,#19937,#19938,#19939,#19940,#19941,#19942,#19943,
#19944,#19945,#19946,#19947,#19948,#19949,#19950,#19951,#19952,#19953,#19954,
#19955,#19956,#19957,#19958,#19959,#19960,#19961,#19962,#19963,#19964,#19965,
#19966,#19967,#19968,#19969,#19970,#19971,#19972,#19973,#19974,#19975,#19976,
#19977,#19978,#19979,#19980,#19981,#19982,#19983,#19984,#19985,#19986,#19987,
#19988,#19989,#19990,#19991,#19992,#19993,#19994,#19995,#19996,#19997,#19998,
#19999,#20000,#20001,#20002,#20003,#20004,#20005,#20006,#20007,#20008,#20009,
#20010,#20011,#20012,#20013,#20014,#20015,#20016,#20017,#20018,#20019,#20020,
#20021,#20022,#20023,#20024,#20025,#20026,#20027,#20028,#20029,#20030,#20031,
#20032,#20033,#20034,#20035,#20036,#20037,#20038,#20039,#20040,#20041,#20042,
#20043,#20044,#20045,#20046,#20047,#20048,#20049,#20050,#20051,#20052,#20053,
#20054,#20055,#20056,#20057,#20058,#20059,#20060,#20061,#20062,#20063,#20064,
#20065,#20066,#20067,#20068,#20069,#20070,#20071,#20072,#20073,#20074,#20075,
#20076,#20077,#20078,#20079,#20080,#20081,#20082,#20083,#20084,#20085,#20086,
#20087,#20088,#20089,#20090,#20091,#20092,#20093,#20094,#20095,#20096,#20097,
#20098,#20099,#20100,#20101,#20102,#20103,#20104,#20105,#20106,#20107,#20108,
#20109,#20110,#20111),.UNSPECIFIED.,.F.,.F.,(4,3,3,3,3,3,3,3,3,3,3,3,3,
3,3,3,3,3,3,3,3,3,3,3,3,3,3,3,3,3,3,3,3,3,3,3,3,3,3,3,3,3,3,3,3,3,3,3,3,
3,3,3,3,3,3,3,3,3,3,3,3,4),(8.70570968963475E-15,0.0246771959537839,0.0499600723105791,
0.0754840635514034,0.101166376318259,0.125,0.136734088168733,0.148820715706915,
0.15625,0.168585759913697,0.181373370322712,0.1875,0.202678404599299,0.237325814238875,
0.25,0.27888120375384,0.308187381373375,0.3125,0.330373013613221,0.34375,
0.355196980743985,0.367082517354808,0.375,0.386500205327485,0.39848303873895,
0.401735609347567,0.40625,0.423516755681464,0.4375,0.483060409640171,0.5,
0.521787733679904,0.543431067460644,0.5625,0.571561162807347,0.578125,0.587599421133375,
0.59375,0.60164383286513,0.625,0.658303459192103,0.6875,0.711271540120067,
0.735022993084069,0.75,0.763304456862165,0.77625439782241,0.78125,0.786792993598229,
0.7890625,0.794976583199937,0.796875,0.802877646206076,0.8125,0.84375,0.875,
0.906047958910778,0.935544711404883,0.96436289654752,0.992286211941088,
0.999191835643113,1.),.UNSPECIFIED.);
#4549=B_SPLINE_CURVE_WITH_KNOTS('',3,(#20115,#20116,#20117,#20118,#20119),
 .UNSPECIFIED.,.F.,.F.,(4,1,4),(1.73299920616933E-8,0.5,1.),
 .UNSPECIFIED.);
#4550=B_SPLINE_CURVE_WITH_KNOTS('',3,(#20148,#20149,#20150,#20151),
 .UNSPECIFIED.,.F.,.F.,(4,4),(-0.00913786883206483,-7.36796526127516E-9),
 .UNSPECIFIED.);
#4551=B_SPLINE_CURVE_WITH_KNOTS('',3,(#20157,#20158,#20159,#20160,#20161),
 .UNSPECIFIED.,.F.,.F.,(4,1,4),(0.,0.5,1.),.UNSPECIFIED.);
#4552=B_SPLINE_CURVE_WITH_KNOTS('',3,(#20185,#20186,#20187,#20188,#20189,
#20190,#20191,#20192,#20193,#20194,#20195,#20196,#20197,#20198,#20199,#20200),
 .UNSPECIFIED.,.F.,.F.,(4,3,3,3,3,4),(1.06951444483842E-9,0.317267229303759,
0.428567951844031,0.595284625971585,0.915205221611323,1.),.UNSPECIFIED.);
#4553=B_SPLINE_CURVE_WITH_KNOTS('',3,(#20202,#20203,#20204,#20205),
 .UNSPECIFIED.,.F.,.F.,(4,4),(1.52248693101805E-6,0.99999893775171),
 .UNSPECIFIED.);
#4554=B_SPLINE_CURVE_WITH_KNOTS('',3,(#20225,#20226,#20227,#20228,#20229,
#20230,#20231,#20232,#20233,#20234,#20235,#20236,#20237,#20238,#20239,#20240,
#20241,#20242,#20243,#20244,#20245,#20246,#20247,#20248,#20249,#20250,#20251,
#20252,#20253,#20254,#20255,#20256,#20257,#20258,#20259,#20260,#20261,#20262,
#20263,#20264),.UNSPECIFIED.,.F.,.F.,(4,3,3,3,3,3,3,3,3,3,3,3,3,4),(5.54695461852234E-10,
0.0701761685377864,0.140658069613172,0.212203367598945,0.287155435432209,
0.365074603897869,0.450301565826742,0.5,0.575946829633,0.656457747985935,
0.745083406203765,0.837500292134858,0.924641644111971,1.),.UNSPECIFIED.);
#4555=B_SPLINE_CURVE_WITH_KNOTS('',3,(#20265,#20266,#20267,#20268,#20269,
#20270,#20271,#20272,#20273,#20274,#20275,#20276,#20277,#20278,#20279,#20280,
#20281,#20282,#20283,#20284,#20285,#20286,#20287,#20288,#20289,#20290,#20291,
#20292,#20293,#20294,#20295,#20296,#20297,#20298,#20299,#20300,#20301,#20302,
#20303,#20304,#20305,#20306,#20307,#20308,#20309,#20310,#20311,#20312,#20313,
#20314,#20315,#20316,#20317,#20318,#20319,#20320,#20321,#20322,#20323,#20324,
#20325,#20326,#20327,#20328,#20329,#20330,#20331,#20332,#20333,#20334,#20335,
#20336,#20337,#20338,#20339,#20340,#20341,#20342,#20343,#20344,#20345,#20346,
#20347,#20348,#20349,#20350,#20351,#20352,#20353,#20354,#20355,#20356,#20357,
#20358),.UNSPECIFIED.,.F.,.F.,(4,3,3,3,3,3,3,3,3,3,3,3,3,3,3,3,3,3,3,3,
3,3,3,3,3,3,3,3,3,3,3,4),(0.,0.0337802582614784,0.0667966136480994,0.100315166073386,
0.125,0.164946253203864,0.205330399697385,0.243835947683454,0.25,0.28685121401594,
0.32237563786883,0.35688965725532,0.375,0.410322186210138,0.445225464996362,
0.478231205927202,0.5,0.535864597060298,0.569990063479658,0.603122029420226,
0.625,0.663707182237767,0.675330672464813,0.712867678766552,0.75,0.786597476014382,
0.822388313438029,0.857749822096094,0.905488175635432,0.92820744435796,
0.963801841682524,1.),.UNSPECIFIED.);
#4556=B_SPLINE_CURVE_WITH_KNOTS('',3,(#20446,#20447,#20448,#20449,#20450,
#20451,#20452,#20453,#20454,#20455,#20456,#20457,#20458,#20459,#20460,#20461,
#20462,#20463,#20464,#20465,#20466,#20467,#20468,#20469,#20470,#20471,#20472,
#20473,#20474,#20475,#20476,#20477,#20478,#20479,#20480,#20481,#20482,#20483,
#20484,#20485,#20486,#20487,#20488,#20489,#20490,#20491,#20492,#20493,#20494,
#20495,#20496,#20497,#20498,#20499,#20500,#20501,#20502,#20503,#20504,#20505,
#20506,#20507,#20508,#20509,#20510,#20511,#20512,#20513,#20514,#20515,#20516,
#20517,#20518,#20519,#20520,#20521,#20522,#20523,#20524,#20525,#20526,#20527,
#20528,#20529,#20530,#20531,#20532,#20533,#20534,#20535,#20536,#20537,#20538,
#20539,#20540,#20541,#20542,#20543,#20544,#20545,#20546,#20547,#20548,#20549,
#20550,#20551,#20552,#20553,#20554,#20555,#20556,#20557,#20558,#20559,#20560,
#20561,#20562,#20563,#20564,#20565,#20566,#20567,#20568,#20569,#20570,#20571,
#20572,#20573,#20574,#20575,#20576,#20577,#20578,#20579,#20580,#20581,#20582,
#20583,#20584,#20585,#20586,#20587,#20588,#20589,#20590,#20591,#20592,#20593,
#20594,#20595,#20596,#20597,#20598,#20599,#20600,#20601,#20602,#20603,#20604,
#20605,#20606,#20607,#20608,#20609,#20610,#20611,#20612,#20613,#20614,#20615,
#20616,#20617,#20618,#20619,#20620,#20621,#20622,#20623,#20624,#20625,#20626,
#20627,#20628,#20629,#20630,#20631,#20632,#20633,#20634,#20635,#20636,#20637,
#20638),.UNSPECIFIED.,.F.,.F.,(4,3,3,3,3,3,3,3,3,3,3,3,3,3,3,3,3,3,3,3,
3,3,3,3,3,3,3,3,3,3,3,3,3,3,3,3,3,3,3,3,3,3,3,3,3,3,3,3,3,3,3,3,3,3,3,3,
3,3,3,3,3,3,3,3,4),(1.28087221076073E-15,0.000806382213929668,0.0316531911069648,
0.0625,0.0819520098013993,0.113885767663964,0.125,0.162400075334837,0.184204750737066,
0.1875,0.206302891050971,0.21875,0.229536845499139,0.234375,0.2421875,0.249113876900393,
0.25,0.257214812713226,0.263809870544722,0.265625,0.275101214912945,0.28125,
0.295825826971116,0.3125,0.349131776793294,0.375,0.392364479838208,0.42347064762644,
0.4375,0.454110790220112,0.46875,0.480539316975388,0.491908774564336,0.5,
0.511477219267851,0.52249833990049,0.53125,0.546875,0.5625,0.584576523958981,
0.597258891706619,0.618953960304272,0.625,0.639277450423659,0.653233174473467,
0.65625,0.672551778876406,0.6875,0.70893957358656,0.729918983848888,0.75,
0.778053831514715,0.79812970435713,0.8125,0.825797605368679,0.838667474489869,
0.84375,0.856291056475283,0.86846117393362,0.875,0.901462525116127,0.927855703839197,
0.954018221115028,0.979641526604575,0.999999950357764),.UNSPECIFIED.);
#4557=B_SPLINE_CURVE_WITH_KNOTS('',3,(#20640,#20641,#20642,#20643,#20644,
#20645,#20646,#20647,#20648,#20649,#20650,#20651,#20652,#20653,#20654,#20655,
#20656,#20657,#20658,#20659,#20660,#20661,#20662,#20663,#20664,#20665,#20666,
#20667,#20668,#20669,#20670,#20671,#20672,#20673,#20674,#20675,#20676,#20677,
#20678,#20679,#20680,#20681,#20682,#20683,#20684,#20685,#20686,#20687,#20688,
#20689,#20690,#20691,#20692,#20693,#20694,#20695,#20696,#20697,#20698,#20699,
#20700,#20701,#20702,#20703,#20704,#20705,#20706,#20707,#20708,#20709,#20710,
#20711,#20712,#20713,#20714,#20715,#20716,#20717,#20718,#20719,#20720,#20721,
#20722,#20723,#20724,#20725,#20726,#20727,#20728,#20729,#20730,#20731,#20732,
#20733,#20734,#20735,#20736,#20737,#20738,#20739,#20740,#20741,#20742,#20743,
#20744,#20745,#20746,#20747,#20748,#20749,#20750,#20751,#20752,#20753,#20754,
#20755,#20756,#20757,#20758,#20759,#20760,#20761,#20762,#20763,#20764,#20765,
#20766,#20767,#20768,#20769,#20770,#20771,#20772,#20773,#20774,#20775,#20776,
#20777,#20778,#20779,#20780,#20781,#20782,#20783,#20784,#20785,#20786,#20787,
#20788,#20789,#20790,#20791,#20792,#20793,#20794,#20795,#20796,#20797,#20798,
#20799,#20800,#20801,#20802,#20803,#20804,#20805,#20806,#20807,#20808,#20809,
#20810,#20811,#20812,#20813,#20814,#20815,#20816,#20817,#20818,#20819,#20820,
#20821,#20822,#20823,#20824,#20825,#20826,#20827,#20828,#20829,#20830,#20831,
#20832,#20833,#20834,#20835),.UNSPECIFIED.,.F.,.F.,(4,3,3,3,3,3,3,3,3,3,
3,3,3,3,3,3,3,3,3,3,3,3,3,3,3,3,3,3,3,3,3,3,3,3,3,3,3,3,3,3,3,3,3,3,3,3,
3,3,3,3,3,3,3,3,3,3,3,3,3,3,3,3,3,3,3,4),(2.00423079578981E-8,0.0320179748723218,
0.0643757341547366,0.0975328875150407,0.125,0.146141328023375,0.167453803074885,
0.1875,0.199191563389592,0.201009854399144,0.213184050260736,0.21875,0.230846408052832,
0.243459433579832,0.25,0.274907494168791,0.299810745927269,0.3125,0.35525859361165,
0.375,0.393840713441892,0.402975273651834,0.40625,0.419231482968487,0.432545031147442,
0.4375,0.453291534406384,0.46965372312694,0.486483972624975,0.5,0.525241075301086,
0.550108715722743,0.5625,0.604742661631409,0.608688248585331,0.625,0.648190109594443,
0.670991047478233,0.6875,0.699954018433334,0.701311161737257,0.7142839829057,
0.71875,0.731440663021589,0.744672597024681,0.75,0.772077429720103,0.793633123646136,
0.803047698606025,0.8125,0.826877791282156,0.840780607640226,0.84375,0.851806340783934,
0.859375,0.86792311308578,0.875,0.89281879505764,0.90625,0.90974022716506,
0.930955439854382,0.9375,0.965695024798108,0.992721104392574,0.999188836559059,
0.999999999999998),.UNSPECIFIED.);
#4558=B_SPLINE_CURVE_WITH_KNOTS('',3,(#20836,#20837,#20838,#20839,#20840),
 .UNSPECIFIED.,.F.,.F.,(4,1,4),(0.,0.5,1.),.UNSPECIFIED.);
#4559=B_SPLINE_CURVE_WITH_KNOTS('',3,(#20872,#20873,#20874,#20875,#20876),
 .UNSPECIFIED.,.F.,.F.,(4,1,4),(0.,0.5,1.),.UNSPECIFIED.);
#4560=B_SPLINE_CURVE_WITH_KNOTS('',3,(#20878,#20879,#20880,#20881,#20882,
#20883,#20884,#20885,#20886,#20887,#20888,#20889,#20890,#20891,#20892,#20893,
#20894,#20895,#20896,#20897,#20898,#20899,#20900,#20901,#20902,#20903,#20904,
#20905,#20906,#20907,#20908,#20909,#20910,#20911,#20912,#20913,#20914,#20915,
#20916,#20917,#20918,#20919,#20920,#20921,#20922,#20923,#20924,#20925,#20926,
#20927,#20928,#20929,#20930,#20931,#20932,#20933,#20934,#20935,#20936,#20937,
#20938,#20939,#20940,#20941,#20942,#20943,#20944,#20945,#20946,#20947,#20948,
#20949,#20950,#20951,#20952,#20953,#20954,#20955,#20956,#20957,#20958,#20959,
#20960,#20961,#20962,#20963,#20964,#20965,#20966,#20967,#20968,#20969,#20970,
#20971,#20972,#20973,#20974,#20975,#20976,#20977,#20978,#20979,#20980,#20981,
#20982,#20983,#20984,#20985,#20986,#20987,#20988,#20989),.UNSPECIFIED.,
 .F.,.F.,(4,3,3,3,3,3,3,3,3,3,3,3,3,3,3,3,3,3,3,3,3,3,3,3,3,3,3,3,3,3,3,
3,3,3,3,3,3,4),(0.,0.0285563452947749,0.0587244826890377,0.0899019518399065,
0.122499178438535,0.125,0.148086002417611,0.173161841425754,0.1875,0.204527465802532,
0.221652052410823,0.237737868877121,0.25,0.267112127147499,0.28342894318993,
0.299377137758135,0.3125,0.336989646974372,0.362311651968385,0.375,0.40442896238099,
0.425107567278564,0.454409429838877,0.483283325854054,0.5,0.53125,0.561326541806047,
0.591244485583944,0.621108556700579,0.625,0.666818615723424,0.707548838056867,
0.744105233292746,0.781835911025732,0.849041143351438,0.915220605213,0.980016745187399,
0.999999999943897),.UNSPECIFIED.);
#4561=B_SPLINE_CURVE_WITH_KNOTS('',3,(#20990,#20991,#20992,#20993,#20994,
#20995,#20996,#20997,#20998,#20999,#21000,#21001,#21002,#21003,#21004,#21005,
#21006,#21007,#21008,#21009,#21010,#21011,#21012,#21013,#21014,#21015,#21016,
#21017,#21018,#21019,#21020,#21021,#21022,#21023,#21024,#21025,#21026,#21027,
#21028,#21029,#21030,#21031,#21032,#21033,#21034,#21035,#21036,#21037,#21038,
#21039,#21040,#21041,#21042,#21043,#21044,#21045,#21046,#21047,#21048,#21049,
#21050,#21051,#21052,#21053,#21054,#21055,#21056,#21057,#21058,#21059,#21060,
#21061,#21062,#21063,#21064,#21065,#21066,#21067,#21068,#21069,#21070,#21071,
#21072,#21073,#21074,#21075,#21076,#21077,#21078,#21079,#21080,#21081,#21082,
#21083,#21084,#21085,#21086,#21087,#21088,#21089,#21090,#21091,#21092,#21093,
#21094,#21095,#21096,#21097,#21098,#21099,#21100,#21101),.UNSPECIFIED.,
 .F.,.F.,(4,3,3,3,3,3,3,3,3,3,3,3,3,3,3,3,3,3,3,3,3,3,3,3,3,3,3,3,3,3,3,
3,3,3,3,3,3,4),(0.,0.0640580999770728,0.12973733605452,0.196362277162966,
0.244471110558544,0.266596857964686,0.292579943954122,0.333789971977061,
0.375,0.404370806537263,0.433835408182012,0.463471832431439,0.493569862672924,
0.5,0.528187773261199,0.556852683460899,0.575302905208438,0.604081546840034,
0.625,0.650195393562891,0.674607338417129,0.6875,0.70346340514434,0.719570423751933,
0.736690523458032,0.75,0.766200389410551,0.783129346522535,0.800153516011964,
0.8125,0.838034619213387,0.861383516792756,0.875,0.907311159133264,0.938566084787891,
0.969283042393945,0.998173387091414,1.),.UNSPECIFIED.);
#4562=B_SPLINE_CURVE_WITH_KNOTS('',3,(#21111,#21112,#21113,#21114,#21115),
 .UNSPECIFIED.,.F.,.F.,(4,1,4),(0.,0.5,1.),.UNSPECIFIED.);
#4563=B_SPLINE_CURVE_WITH_KNOTS('',3,(#21154,#21155,#21156,#21157,#21158),
 .UNSPECIFIED.,.F.,.F.,(4,1,4),(0.,0.5,1.),.UNSPECIFIED.);
#4564=B_SPLINE_CURVE_WITH_KNOTS('',3,(#21161,#21162,#21163,#21164,#21165,
#21166,#21167,#21168,#21169,#21170,#21171,#21172,#21173,#21174,#21175,#21176),
 .UNSPECIFIED.,.F.,.F.,(4,3,3,3,3,4),(2.98158753176563E-11,0.318480831820824,
0.42856803268137,0.5,0.820311652718721,0.999999994983669),.UNSPECIFIED.);
#4565=B_SPLINE_CURVE_WITH_KNOTS('',3,(#21200,#21201,#21202,#21203),
 .UNSPECIFIED.,.F.,.F.,(4,4),(0.,0.00913775679503262),.UNSPECIFIED.);
#4566=B_SPLINE_CURVE_WITH_KNOTS('',3,(#21270,#21271,#21272,#21273,#21274,
#21275,#21276,#21277,#21278,#21279,#21280,#21281,#21282,#21283,#21284,#21285,
#21286,#21287,#21288,#21289,#21290,#21291,#21292,#21293,#21294,#21295,#21296,
#21297,#21298,#21299,#21300,#21301,#21302,#21303,#21304,#21305,#21306,#21307,
#21308,#21309,#21310,#21311,#21312,#21313,#21314,#21315,#21316,#21317,#21318,
#21319,#21320,#21321,#21322,#21323,#21324),.UNSPECIFIED.,.F.,.F.,(4,3,3,
3,3,3,3,3,3,3,3,3,3,3,3,3,3,3,4),(3.88801098422698E-10,0.0918204141815988,
0.16446622432535,0.285714285714286,0.369938718465529,0.428571428571429,
0.500132316415764,0.571428571428571,0.621063402335707,0.677647063821791,
0.714285714285714,0.749801751039648,0.793502066082517,0.844095214862109,
0.857142857142857,0.896730569875841,0.941309592770509,0.995388455693668,
1.),.UNSPECIFIED.);
#4567=B_SPLINE_CURVE_WITH_KNOTS('',3,(#21326,#21327,#21328,#21329,#21330,
#21331,#21332,#21333,#21334,#21335),.UNSPECIFIED.,.F.,.F.,(4,3,3,4),(0.,
0.497003948181981,0.748501478213025,1.),.UNSPECIFIED.);
#4568=B_SPLINE_CURVE_WITH_KNOTS('',3,(#21338,#21339,#21340,#21341,#21342,
#21343,#21344,#21345,#21346,#21347,#21348,#21349,#21350,#21351,#21352,#21353,
#21354,#21355,#21356,#21357,#21358,#21359,#21360,#21361,#21362,#21363,#21364,
#21365,#21366,#21367,#21368,#21369,#21370,#21371),.UNSPECIFIED.,.F.,.F.,
(4,3,3,3,3,3,3,3,3,3,3,4),(0.,0.134667621898311,0.251651479184689,0.333333333333333,
0.426460201096014,0.503339075490605,0.607908914833682,0.666666666666667,
0.767399408930376,0.858691913857038,0.939786547211005,1.),.UNSPECIFIED.);
#4569=B_SPLINE_CURVE_WITH_KNOTS('',3,(#21453,#21454,#21455,#21456,#21457,
#21458,#21459,#21460,#21461,#21462,#21463,#21464,#21465,#21466,#21467,#21468,
#21469,#21470,#21471,#21472,#21473,#21474,#21475,#21476,#21477,#21478,#21479,
#21480,#21481,#21482,#21483,#21484,#21485,#21486,#21487,#21488,#21489,#21490,
#21491,#21492,#21493,#21494,#21495,#21496,#21497,#21498,#21499,#21500,#21501,
#21502,#21503,#21504,#21505,#21506,#21507),.UNSPECIFIED.,.F.,.F.,(4,3,3,
3,3,3,3,3,3,3,3,3,3,3,3,3,3,3,4),(6.30753947868313E-11,0.101365321636145,
0.168556871299005,0.285714285714286,0.367595751132877,0.428571428571429,
0.500132708841945,0.571428571428571,0.621026637272984,0.677503665591991,
0.714285714285714,0.749800666976806,0.793170473608086,0.843433747682298,
0.857142857142857,0.89649147501257,0.940850623952861,0.994423320637066,
1.),.UNSPECIFIED.);
#4570=B_SPLINE_CURVE_WITH_KNOTS('',3,(#21509,#21510,#21511,#21512,#21513,
#21514,#21515,#21516,#21517,#21518),.UNSPECIFIED.,.F.,.F.,(4,3,3,4),(0.,
0.497003820659038,0.748501430069274,1.),.UNSPECIFIED.);
#4571=B_SPLINE_CURVE_WITH_KNOTS('',3,(#21521,#21522,#21523,#21524,#21525,
#21526,#21527,#21528,#21529,#21530,#21531,#21532,#21533,#21534,#21535,#21536,
#21537,#21538,#21539,#21540,#21541,#21542,#21543,#21544,#21545,#21546,#21547,
#21548,#21549,#21550,#21551,#21552,#21553,#21554,#21555,#21556,#21557,#21558,
#21559,#21560),.UNSPECIFIED.,.F.,.F.,(4,3,3,3,3,3,3,3,3,3,3,3,3,4),(0.,
0.134739878593539,0.251649490335417,0.314570810621762,0.331616125067443,
0.349524307347104,0.443247703298697,0.503334771480798,0.608059381399025,
0.666666666666667,0.766766371876696,0.857571164140892,0.938611711336945,
1.),.UNSPECIFIED.);
#4572=B_SPLINE_CURVE_WITH_KNOTS('',3,(#21567,#21568,#21569,#21570,#21571,
#21572,#21573),.UNSPECIFIED.,.F.,.F.,(4,3,4),(0.,0.496994164307838,1.),
 .UNSPECIFIED.);
#4573=B_SPLINE_CURVE_WITH_KNOTS('',3,(#21587,#21588,#21589,#21590,#21591,
#21592,#21593,#21594,#21595,#21596,#21597,#21598,#21599,#21600,#21601,#21602,
#21603,#21604,#21605,#21606,#21607,#21608,#21609,#21610,#21611,#21612,#21613,
#21614,#21615,#21616,#21617,#21618,#21619,#21620,#21621,#21622,#21623,#21624,
#21625,#21626,#21627,#21628,#21629,#21630,#21631,#21632,#21633,#21634,#21635,
#21636,#21637,#21638,#21639,#21640,#21641,#21642,#21643,#21644,#21645,#21646,
#21647,#21648,#21649,#21650,#21651,#21652,#21653,#21654,#21655,#21656,#21657,
#21658,#21659,#21660,#21661,#21662,#21663,#21664,#21665,#21666,#21667,#21668,
#21669,#21670,#21671,#21672,#21673,#21674,#21675,#21676,#21677),
 .UNSPECIFIED.,.F.,.F.,(4,3,3,3,3,3,3,3,3,3,3,3,3,3,3,3,3,3,3,3,3,3,3,3,
3,3,3,3,3,3,4),(0.5,0.520092482115884,0.539174546383879,0.559145992527202,
0.571429033982231,0.580438003857807,0.604212141992737,0.63934613663106,
0.642857095172122,0.664302413747282,0.687418075834385,0.705983572713005,
0.714285707884672,0.725730331707066,0.744177467180111,0.764445366979151,
0.785714268152568,0.789792308823266,0.816068270220358,0.83591791982785,
0.853766213669357,0.857142853274139,0.87320411884061,0.893754273983476,
0.913097329761236,0.928571414853337,0.936713746659091,0.955741988035712,
0.973026147296455,0.988800609664217,1.),.UNSPECIFIED.);
#4574=B_SPLINE_CURVE_WITH_KNOTS('',3,(#21678,#21679,#21680,#21681,#21682,
#21683,#21684,#21685,#21686,#21687,#21688,#21689,#21690,#21691,#21692,#21693,
#21694,#21695,#21696,#21697,#21698,#21699,#21700,#21701,#21702,#21703,#21704,
#21705,#21706,#21707,#21708,#21709,#21710,#21711,#21712,#21713,#21714,#21715,
#21716,#21717,#21718,#21719,#21720,#21721,#21722,#21723,#21724,#21725,#21726,
#21727,#21728,#21729,#21730,#21731,#21732,#21733,#21734,#21735,#21736,#21737,
#21738,#21739,#21740,#21741,#21742,#21743,#21744,#21745,#21746,#21747,#21748,
#21749,#21750,#21751,#21752,#21753,#21754,#21755,#21756),.UNSPECIFIED.,
 .F.,.F.,(4,3,3,3,3,3,3,3,3,3,3,3,3,3,3,3,3,3,3,3,3,3,3,3,3,3,4),(0.0111921075400361,
0.0264673541794099,0.0424499356409565,0.0596026345894813,0.0787088673758042,
0.103597141898638,0.124792187153409,0.128372320529973,0.146760877458987,
0.163387136026761,0.179887386895024,0.197033433204259,0.215968843628993,
0.236726520594614,0.250001388576325,0.260587441529619,0.290514011338416,
0.312257051639016,0.3314624901509,0.350026797470391,0.369272839498593,0.389364156510239,
0.411101943036727,0.436469203248324,0.468234601624161,0.491946009174239,
0.5),.UNSPECIFIED.);
#4575=B_SPLINE_CURVE_WITH_KNOTS('',3,(#21759,#21760,#21761,#21762,#21763,
#21764,#21765,#21766,#21767,#21768,#21769,#21770,#21771,#21772,#21773,#21774,
#21775,#21776,#21777,#21778,#21779,#21780,#21781,#21782,#21783,#21784,#21785,
#21786,#21787,#21788,#21789,#21790,#21791,#21792,#21793,#21794,#21795,#21796,
#21797,#21798,#21799,#21800,#21801,#21802,#21803,#21804,#21805,#21806,#21807,
#21808,#21809,#21810,#21811,#21812,#21813,#21814,#21815,#21816,#21817,#21818,
#21819,#21820,#21821,#21822,#21823,#21824,#21825,#21826,#21827,#21828,#21829,
#21830,#21831,#21832,#21833,#21834,#21835,#21836,#21837,#21838,#21839,#21840,
#21841,#21842,#21843,#21844,#21845,#21846,#21847,#21848,#21849),
 .UNSPECIFIED.,.F.,.F.,(4,3,3,3,3,3,3,3,3,3,3,3,3,3,3,3,3,3,3,3,3,3,3,3,
3,3,3,3,3,3,4),(0.5,0.5229706916853,0.545286927373279,0.569542787810877,
0.571428578270122,0.598144921796489,0.636303053155579,0.642856817797929,
0.661819807718087,0.686234800861308,0.706221293534636,0.714286057881134,
0.728320963568603,0.747649381403904,0.769687359583627,0.78571350421503,
0.797077781047478,0.817887321627158,0.835862692399047,0.85252157601583,
0.8571429287243,0.869557720425656,0.885861114845565,0.904825040466098,0.926857533921688,
0.928571422818278,0.944003811706262,0.959514118255809,0.974162424775124,
0.987795285455336,0.988810731294439),.UNSPECIFIED.);
#4576=B_SPLINE_CURVE_WITH_KNOTS('',3,(#21851,#21852,#21853,#21854,#21855,
#21856,#21857,#21858,#21859,#21860,#21861,#21862,#21863,#21864,#21865,#21866,
#21867,#21868,#21869,#21870,#21871,#21872,#21873,#21874,#21875,#21876,#21877,
#21878,#21879,#21880,#21881,#21882,#21883,#21884,#21885,#21886,#21887,#21888,
#21889,#21890,#21891,#21892,#21893,#21894,#21895,#21896,#21897,#21898,#21899,
#21900,#21901,#21902,#21903,#21904,#21905,#21906,#21907,#21908,#21909,#21910,
#21911,#21912,#21913,#21914,#21915,#21916,#21917,#21918,#21919,#21920,#21921,
#21922,#21923),.UNSPECIFIED.,.F.,.F.,(4,3,3,3,3,3,3,3,3,3,3,3,3,3,3,3,3,
3,3,3,3,3,3,3,4),(0.,0.0174840934954571,0.0360254511092363,0.0561545887126358,
0.0792144922163311,0.108091731276013,0.124970144531186,0.132585998071262,
0.152434915945689,0.174157733699083,0.195673533011373,0.219686786452727,
0.249182776545768,0.249993048457861,0.280534929477547,0.303510630138684,
0.325164234786097,0.347919910113639,0.372333219113472,0.375012405181579,
0.39950455413142,0.438906089221835,0.469453044610917,0.49435520964175,0.499999999953544),
 .UNSPECIFIED.);
#4577=B_SPLINE_CURVE_WITH_KNOTS('',3,(#21991,#21992,#21993,#21994,#21995,
#21996,#21997,#21998,#21999,#22000,#22001,#22002,#22003,#22004,#22005,#22006,
#22007,#22008),.UNSPECIFIED.,.F.,.F.,(4,2,2,2,2,2,2,2,4),(4.38552703595117E-6,
0.0437377325864986,0.0878604345468199,0.176097509597498,0.352347530273406,
0.702718754455331,1.38876497448283,2.05095424684158,2.70823477331594),
 .UNSPECIFIED.);
#4578=B_SPLINE_CURVE_WITH_KNOTS('',3,(#22012,#22013,#22014,#22015,#22016,
#22017,#22018,#22019,#22020,#22021,#22022,#22023,#22024,#22025,#22026,#22027,
#22028,#22029,#22030,#22031,#22032,#22033,#22034,#22035,#22036,#22037,#22038,
#22039,#22040,#22041,#22042,#22043,#22044,#22045,#22046,#22047,#22048,#22049,
#22050,#22051,#22052,#22053,#22054,#22055,#22056,#22057,#22058,#22059,#22060,
#22061,#22062,#22063,#22064,#22065,#22066,#22067,#22068,#22069,#22070,#22071,
#22072,#22073,#22074,#22075,#22076,#22077,#22078,#22079,#22080,#22081,#22082,
#22083,#22084,#22085,#22086,#22087,#22088,#22089,#22090,#22091,#22092,#22093,
#22094,#22095,#22096,#22097,#22098,#22099,#22100,#22101,#22102,#22103,#22104,
#22105,#22106,#22107,#22108,#22109,#22110,#22111,#22112,#22113,#22114,#22115,
#22116,#22117),.UNSPECIFIED.,.F.,.F.,(4,3,3,3,3,3,3,3,3,3,3,3,3,3,3,3,3,
3,3,3,3,3,3,3,3,3,3,3,3,3,3,3,3,3,3,4),(2.77216657214863E-8,0.00700797234905248,
0.0816120434170171,0.125,0.165370029833635,0.204154365033029,0.244263856574144,
0.25,0.296669528127354,0.302705664174657,0.348321827056945,0.375,0.401295915794153,
0.433183128434686,0.466521031697018,0.49985893495935,0.5,0.557903950321587,
0.598438233516612,0.625,0.661387298869527,0.698142484844101,0.734702987141347,
0.75,0.776193469488184,0.795587342824627,0.82204055467788,0.844887139651126,
0.871011278497404,0.875,0.90191935369594,0.928824275134278,0.955612044631136,
0.982106193186031,0.992709249999548,0.999999999999994),.UNSPECIFIED.);
#4579=B_SPLINE_CURVE_WITH_KNOTS('',3,(#22121,#22122,#22123,#22124,#22125,
#22126,#22127,#22128,#22129,#22130,#22131,#22132,#22133,#22134,#22135,#22136),
 .UNSPECIFIED.,.F.,.F.,(4,2,2,2,2,2,2,4),(-1.55610915337267,-1.33086413681062,
-1.09917569818662,-0.770092304477629,-0.406703713019852,-0.20635190222013,
-0.122402179086305,-2.5562019168035E-9),.UNSPECIFIED.);
#4580=B_SPLINE_CURVE_WITH_KNOTS('',3,(#22137,#22138,#22139,#22140,#22141,
#22142,#22143,#22144),.UNSPECIFIED.,.F.,.F.,(4,2,2,4),(6.77201704714421E-5,
0.000741543104721708,0.00167386047160395,0.00328924633648685),
 .UNSPECIFIED.);
#4581=B_SPLINE_CURVE_WITH_KNOTS('',3,(#22223,#22224,#22225,#22226,#22227,
#22228,#22229,#22230,#22231,#22232),.UNSPECIFIED.,.F.,.F.,(4,2,2,2,4),(0.000356897517421662,
0.864656625165064,1.72235272051877,2.58587022128493,3.56088185569009),
 .UNSPECIFIED.);
#4582=B_SPLINE_CURVE_WITH_KNOTS('',3,(#22234,#22235,#22236,#22237,#22238,
#22239,#22240,#22241),.UNSPECIFIED.,.F.,.F.,(4,2,2,4),(0.000354924071710644,
0.00192588828198874,0.00301984234772518,0.00346930312855839),
 .UNSPECIFIED.);
#4583=B_SPLINE_CURVE_WITH_KNOTS('',3,(#22242,#22243,#22244,#22245,#22246,
#22247,#22248,#22249,#22250,#22251,#22252,#22253,#22254,#22255),
 .UNSPECIFIED.,.F.,.F.,(4,2,2,2,2,2,4),(-2.6488027497305,-2.41281103659909,
-2.07312485188326,-1.59092335980205,-0.993103494682954,-0.496648561846396,
-0.000472961941704166),.UNSPECIFIED.);
#4584=B_SPLINE_CURVE_WITH_KNOTS('',3,(#22257,#22258,#22259,#22260,#22261,
#22262,#22263,#22264,#22265,#22266,#22267,#22268,#22269,#22270,#22271,#22272,
#22273,#22274,#22275,#22276,#22277,#22278,#22279,#22280,#22281,#22282,#22283,
#22284,#22285,#22286,#22287,#22288,#22289,#22290,#22291,#22292,#22293,#22294,
#22295,#22296,#22297,#22298,#22299,#22300,#22301,#22302,#22303,#22304,#22305,
#22306,#22307,#22308,#22309,#22310,#22311,#22312,#22313,#22314,#22315,#22316,
#22317,#22318,#22319,#22320,#22321,#22322,#22323),.UNSPECIFIED.,.F.,.F.,
(4,3,3,3,3,3,3,3,3,3,3,3,3,3,3,3,3,3,3,3,3,3,4),(0.,0.0594221593429255,
0.117996120869444,0.17543866590243,0.199710729099379,0.25,0.305423141631845,
0.362147159389654,0.419400029119915,0.476827540899891,0.5,0.566103934825291,
0.598105313598116,0.665393026723291,0.734213366418853,0.75,0.796101846559869,
0.798587531560318,0.844408547656744,0.890287854427279,0.936013409159046,
0.981264225240724,1.),.UNSPECIFIED.);
#4585=B_SPLINE_CURVE_WITH_KNOTS('',3,(#22324,#22325,#22326,#22327,#22328,
#22329,#22330,#22331,#22332,#22333,#22334,#22335,#22336,#22337,#22338,#22339,
#22340,#22341,#22342,#22343,#22344,#22345,#22346,#22347,#22348,#22349,#22350,
#22351,#22352,#22353,#22354,#22355,#22356,#22357,#22358,#22359,#22360,#22361,
#22362,#22363,#22364,#22365,#22366,#22367,#22368,#22369,#22370,#22371,#22372,
#22373,#22374,#22375,#22376,#22377,#22378,#22379,#22380,#22381,#22382,#22383,
#22384,#22385,#22386,#22387,#22388,#22389,#22390),.UNSPECIFIED.,.F.,.F.,
(4,3,3,3,3,3,3,3,3,3,3,3,3,3,3,3,3,3,3,3,3,3,4),(3.63902048048213E-11,2.25228167313903E-5,
0.0633146771885113,0.126171225810304,0.188240184375736,0.25,0.302941491829328,
0.355476732555382,0.398163919927467,0.450599514455769,0.5,0.568672203064219,
0.598449280208953,0.666784744903588,0.731868911099793,0.75,0.79203198041192,
0.798960545355713,0.840996715948387,0.882876507884516,0.924464284944599,
0.965375606456728,0.999999857315868),.UNSPECIFIED.);
#4586=B_SPLINE_CURVE_WITH_KNOTS('',3,(#22400,#22401,#22402,#22403,#22404),
 .UNSPECIFIED.,.F.,.F.,(4,1,4),(0.,0.0561570770943636,0.112314154188727),
 .UNSPECIFIED.);
#4587=B_SPLINE_CURVE_WITH_KNOTS('',3,(#22406,#22407,#22408,#22409,#22410),
 .UNSPECIFIED.,.F.,.F.,(4,1,4),(9.82057129081857E-12,0.0809029588062504,
0.16180591760268),.UNSPECIFIED.);
#4588=B_SPLINE_CURVE_WITH_KNOTS('',3,(#22419,#22420,#22421,#22422,#22423),
 .UNSPECIFIED.,.F.,.F.,(4,1,4),(1.76475460956039E-15,0.0809029587725945,
0.161805917545187),.UNSPECIFIED.);
#4589=B_SPLINE_CURVE_WITH_KNOTS('',3,(#22424,#22425,#22426,#22427,#22428),
 .UNSPECIFIED.,.F.,.F.,(4,1,4),(-0.112314155731004,-0.056157077865502,0.),
 .UNSPECIFIED.);
#4590=B_SPLINE_CURVE_WITH_KNOTS('',3,(#22434,#22435,#22436,#22437,#22438,
#22439,#22440,#22441,#22442,#22443,#22444,#22445,#22446,#22447,#22448,#22449,
#22450,#22451,#22452,#22453,#22454,#22455,#22456,#22457,#22458,#22459,#22460,
#22461,#22462,#22463,#22464,#22465,#22466,#22467,#22468,#22469,#22470,#22471,
#22472,#22473),.UNSPECIFIED.,.F.,.F.,(4,3,3,3,3,3,3,3,3,3,3,3,3,4),(0.,
0.0850938257607392,0.177355924287758,0.266044424606055,0.349930411101897,
0.426764374187945,0.5,0.585815635043057,0.665263119890361,0.740666650785828,
0.8125490652712,0.883316847895665,0.953563377585639,0.999999998910195),
 .UNSPECIFIED.);
#4591=B_SPLINE_CURVE_WITH_KNOTS('',3,(#22475,#22476,#22477,#22478,#22479,
#22480,#22481,#22482,#22483,#22484,#22485,#22486,#22487,#22488,#22489,#22490,
#22491,#22492,#22493,#22494,#22495,#22496,#22497,#22498,#22499,#22500,#22501,
#22502,#22503,#22504,#22505,#22506,#22507,#22508,#22509,#22510,#22511,#22512,
#22513,#22514,#22515,#22516,#22517,#22518,#22519,#22520,#22521,#22522,#22523,
#22524,#22525,#22526,#22527,#22528,#22529,#22530,#22531,#22532,#22533,#22534,
#22535,#22536,#22537,#22538,#22539,#22540,#22541,#22542,#22543,#22544,#22545,
#22546,#22547,#22548,#22549,#22550,#22551,#22552,#22553,#22554,#22555,#22556,
#22557,#22558,#22559,#22560,#22561,#22562,#22563,#22564,#22565),
 .UNSPECIFIED.,.F.,.F.,(4,3,3,3,3,3,3,3,3,3,3,3,3,3,3,3,3,3,3,3,3,3,3,3,
3,3,3,3,3,3,4),(5.36154145431789E-8,0.0449949470870602,0.0901649723106573,
0.13596550844084,0.142021843707928,0.189807094531779,0.240378567245189,
0.25,0.285341924111026,0.287664156863037,0.324090359320801,0.361042588632768,
0.375,0.406415902248855,0.43847574557391,0.472858638239873,0.5,0.531154434419632,
0.564172337855349,0.58000260436445,0.613634962493227,0.625,0.658797225305074,
0.69290211441356,0.728583058244867,0.75,0.797199236327656,0.849865402709616,
0.903929619815035,0.955212416831973,1.),.UNSPECIFIED.);
#4592=B_SPLINE_CURVE_WITH_KNOTS('',3,(#22568,#22569,#22570,#22571,#22572),
 .UNSPECIFIED.,.F.,.F.,(4,1,4),(0.,0.5,1.),.UNSPECIFIED.);
#4593=B_SPLINE_CURVE_WITH_KNOTS('',3,(#22575,#22576,#22577,#22578,#22579,
#22580,#22581,#22582,#22583,#22584,#22585,#22586,#22587,#22588,#22589,#22590,
#22591,#22592,#22593,#22594,#22595,#22596,#22597,#22598,#22599,#22600,#22601,
#22602,#22603,#22604,#22605,#22606,#22607,#22608,#22609,#22610,#22611,#22612,
#22613,#22614,#22615,#22616,#22617,#22618,#22619,#22620,#22621,#22622,#22623,
#22624,#22625,#22626),.UNSPECIFIED.,.F.,.F.,(4,3,3,3,3,3,3,3,3,3,3,3,3,
3,3,3,3,4),(0.,0.0658685647089281,0.129902862025649,0.190957751787471,0.25,
0.295978246595851,0.341374379523242,0.3863950160495,0.431368319839074,0.476589727168519,
0.5,0.568233260599974,0.638892217310673,0.711799124926859,0.787186012263256,
0.862859644731581,0.937299742449325,1.),.UNSPECIFIED.);
#4594=B_SPLINE_CURVE_WITH_KNOTS('',3,(#22780,#22781,#22782,#22783,#22784,
#22785,#22786,#22787,#22788,#22789,#22790,#22791,#22792,#22793,#22794,#22795,
#22796,#22797,#22798,#22799,#22800,#22801,#22802,#22803,#22804,#22805,#22806,
#22807,#22808,#22809,#22810,#22811,#22812,#22813,#22814,#22815,#22816,#22817,
#22818,#22819,#22820,#22821,#22822,#22823,#22824,#22825,#22826,#22827,#22828,
#22829,#22830,#22831,#22832,#22833,#22834,#22835,#22836,#22837),
 .UNSPECIFIED.,.F.,.F.,(4,3,3,3,3,3,3,3,3,3,3,3,3,3,3,3,3,3,3,4),(0.,0.0604034126031064,
0.121131713417963,0.18166322472897,0.243156134333892,0.256860347265498,
0.342247605207078,0.427634863148658,0.468015869800871,0.499217744222713,
0.513886754640775,0.593413956711824,0.674658105317451,0.713675808327799,
0.740539817614248,0.759940412691056,0.822076897901006,0.884118562281459,
0.945270441396745,1.),.UNSPECIFIED.);
#4595=B_SPLINE_CURVE_WITH_KNOTS('',3,(#22839,#22840,#22841,#22842,#22843,
#22844,#22845),.UNSPECIFIED.,.F.,.F.,(4,1,1,1,4),(0.,0.25,0.5,0.75,1.),
 .UNSPECIFIED.);
#4596=B_SPLINE_CURVE_WITH_KNOTS('',3,(#22847,#22848,#22849,#22850,#22851,
#22852,#22853,#22854,#22855,#22856,#22857,#22858,#22859,#22860,#22861,#22862,
#22863,#22864,#22865,#22866,#22867,#22868,#22869,#22870,#22871,#22872,#22873,
#22874,#22875,#22876,#22877,#22878,#22879,#22880,#22881,#22882,#22883,#22884,
#22885,#22886,#22887,#22888,#22889),.UNSPECIFIED.,.F.,.F.,(4,3,3,3,3,3,
3,3,3,3,3,3,3,3,4),(1.71517255007165E-6,0.0130062341092902,0.170254370145169,
0.282568052362035,0.338724893470467,0.37173391081744,0.392983287851696,
0.3948817345789,0.496013832537524,0.585382862847774,0.686528515488609,0.787153827581485,
0.886807486787808,0.966970556732888,1.),.UNSPECIFIED.);
#4597=B_SPLINE_CURVE_WITH_KNOTS('',3,(#23024,#23025,#23026,#23027,#23028,
#23029,#23030,#23031),.UNSPECIFIED.,.F.,.F.,(4,1,1,1,1,4),(2.56663484004641E-6,
0.125002233156287,0.250001899677734,0.500001232720627,0.75000056576352,
0.999999828689292),.UNSPECIFIED.);
#4598=B_SPLINE_CURVE_WITH_KNOTS('',3,(#23033,#23034,#23035,#23036,#23037,
#23038,#23039,#23040,#23041,#23042,#23043,#23044,#23045,#23046,#23047,#23048,
#23049,#23050,#23051,#23052,#23053,#23054,#23055,#23056,#23057,#23058,#23059,
#23060,#23061,#23062,#23063,#23064,#23065,#23066,#23067,#23068,#23069,#23070,
#23071,#23072,#23073,#23074,#23075,#23076,#23077,#23078,#23079,#23080,#23081,
#23082,#23083,#23084,#23085,#23086,#23087,#23088,#23089,#23090,#23091,#23092,
#23093,#23094,#23095,#23096,#23097,#23098,#23099,#23100,#23101,#23102,#23103,
#23104,#23105,#23106,#23107,#23108,#23109,#23110,#23111,#23112,#23113,#23114,
#23115,#23116,#23117,#23118,#23119,#23120,#23121,#23122,#23123,#23124,#23125,
#23126,#23127,#23128,#23129,#23130,#23131,#23132,#23133,#23134,#23135,#23136,
#23137,#23138,#23139,#23140,#23141,#23142,#23143,#23144,#23145,#23146,#23147,
#23148,#23149,#23150,#23151,#23152,#23153,#23154,#23155,#23156,#23157,#23158,
#23159,#23160,#23161,#23162,#23163,#23164,#23165,#23166,#23167,#23168,#23169,
#23170,#23171,#23172,#23173,#23174,#23175,#23176,#23177,#23178,#23179,#23180,
#23181,#23182,#23183,#23184,#23185,#23186,#23187,#23188,#23189,#23190,#23191,
#23192,#23193,#23194,#23195,#23196,#23197,#23198,#23199,#23200,#23201,#23202,
#23203,#23204,#23205,#23206,#23207,#23208,#23209,#23210,#23211,#23212,#23213,
#23214,#23215,#23216,#23217,#23218,#23219,#23220,#23221,#23222,#23223,#23224,
#23225,#23226,#23227,#23228,#23229,#23230,#23231,#23232,#23233,#23234,#23235,
#23236,#23237,#23238,#23239,#23240,#23241,#23242,#23243,#23244,#23245,#23246,
#23247,#23248,#23249,#23250,#23251,#23252,#23253,#23254,#23255,#23256,#23257,
#23258,#23259,#23260,#23261,#23262,#23263,#23264,#23265,#23266,#23267,#23268,
#23269,#23270,#23271,#23272,#23273,#23274,#23275,#23276,#23277,#23278,#23279,
#23280,#23281,#23282,#23283,#23284,#23285,#23286,#23287,#23288,#23289,#23290,
#23291,#23292,#23293,#23294,#23295,#23296,#23297,#23298,#23299,#23300,#23301,
#23302,#23303,#23304,#23305,#23306,#23307,#23308,#23309,#23310,#23311,#23312,
#23313,#23314,#23315,#23316,#23317,#23318,#23319,#23320,#23321,#23322,#23323,
#23324,#23325,#23326,#23327,#23328,#23329,#23330,#23331,#23332,#23333,#23334,
#23335,#23336,#23337,#23338,#23339,#23340,#23341,#23342,#23343,#23344,#23345),
 .UNSPECIFIED.,.F.,.F.,(4,3,3,3,3,3,3,3,3,3,3,3,3,3,3,3,3,3,3,3,3,3,3,3,
3,3,3,3,3,3,3,3,3,3,3,3,3,3,3,3,3,3,3,3,3,3,3,3,3,3,3,3,3,3,3,3,3,3,3,3,
3,3,3,3,3,3,3,3,3,3,3,3,3,3,3,3,3,3,3,3,3,3,3,3,3,3,3,3,3,3,3,3,3,3,3,3,
3,3,3,3,3,3,3,3,4),(1.76469316693007E-14,0.006865383049922,0.011609113774343,
0.015625,0.0165991390276023,0.0230332001239444,0.0294133233808459,0.03125,
0.0377966681731069,0.0443622847935373,0.046875,0.0525828727751217,0.0546875,
0.0600691641429055,0.0625,0.0651844451256954,0.06640625,0.068359375,0.0703125,
0.0718958872675833,0.072265625,0.0736804623286539,0.07421875,0.0768807894356838,
0.078125,0.0828559958933853,0.0859375,0.0928407135725418,0.09375,0.104615598837756,
0.109375,0.123350156449136,0.125,0.132912813173459,0.140906999171825,0.148894668430195,
0.15625,0.168388527009413,0.180194702933318,0.1875,0.202420820433108,0.208088409318011,
0.21875,0.23538511338703,0.25,0.260001790974858,0.265625,0.27117194581231,
0.2734375,0.27734375,0.28125,0.283452264364198,0.28515625,0.287514253134798,
0.2890625,0.294708388336963,0.296875,0.306981051182084,0.3125,0.331923672082747,
0.34375,0.363131156427957,0.375,0.392348776360369,0.409254178180606,0.414898366668689,
0.432242307059178,0.4375,0.449712114925661,0.461805525548966,0.46875,0.477161975583313,
0.485493409655428,0.493645198155656,0.5,0.505977667430484,0.511919545446475,
0.515625,0.524105091747034,0.53125,0.546875,0.5625,0.580164343155078,0.599885628375346,
0.620005930067101,0.625,0.646101895184083,0.667449659425663,0.69089455512774,
0.712942710275605,0.735228307617812,0.748334012338276,0.757074612397327,
0.761229242233971,0.783528995852351,0.806170611509198,0.829173088313675,
0.852750325000848,0.874163441066557,0.889205495907866,0.913753955175979,
0.938971609265071,0.964598263798891,0.990848059620842,1.),.UNSPECIFIED.);
#4599=B_SPLINE_CURVE_WITH_KNOTS('',3,(#23346,#23347,#23348,#23349,#23350,
#23351,#23352,#23353,#23354,#23355,#23356,#23357,#23358,#23359,#23360,#23361,
#23362,#23363,#23364,#23365,#23366,#23367,#23368,#23369,#23370,#23371,#23372,
#23373,#23374,#23375,#23376,#23377,#23378,#23379,#23380,#23381,#23382,#23383,
#23384,#23385,#23386,#23387,#23388,#23389,#23390,#23391),.UNSPECIFIED.,
 .F.,.F.,(4,3,3,3,3,3,3,3,3,3,3,3,3,3,3,4),(6.1728034572769E-11,0.075165907468547,
0.151413082725622,0.228785098961171,0.307921728969511,0.388126447492986,
0.469957625099868,0.5,0.584657915863653,0.670697179177869,0.758867383921418,
0.848365848284523,0.939784932409529,0.95142032632107,0.980030048166479,
1.),.UNSPECIFIED.);
#4600=B_SPLINE_CURVE_WITH_KNOTS('',3,(#23525,#23526,#23527,#23528),
 .UNSPECIFIED.,.F.,.F.,(4,4),(1.21393104242082E-6,0.207679115837184),
 .UNSPECIFIED.);
#4601=B_SPLINE_CURVE_WITH_KNOTS('',3,(#23530,#23531,#23532,#23533,#23534,
#23535,#23536,#23537,#23538,#23539,#23540,#23541,#23542),.UNSPECIFIED.,
 .F.,.F.,(4,3,3,3,4),(0.207679115837184,0.475178417105748,0.737587808168293,
0.981736592455952,0.999997199230838),.UNSPECIFIED.);
#4602=B_SPLINE_CURVE_WITH_KNOTS('',3,(#23543,#23544,#23545,#23546,#23547,
#23548,#23549,#23550,#23551,#23552,#23553,#23554,#23555,#23556,#23557,#23558,
#23559,#23560,#23561,#23562,#23563,#23564,#23565,#23566,#23567,#23568,#23569,
#23570,#23571,#23572,#23573,#23574,#23575,#23576),.UNSPECIFIED.,.F.,.F.,
(4,3,3,3,3,3,3,3,3,3,3,4),(0.,0.108640367589986,0.216623052933675,0.323233315604873,
0.358989969628768,0.467943079880847,0.5,0.599281027544431,0.700126002732463,
0.801236596857684,0.901703857559724,0.99999999059269),.UNSPECIFIED.);
#4603=B_SPLINE_CURVE_WITH_KNOTS('',3,(#23608,#23609,#23610,#23611,#23612,
#23613,#23614,#23615,#23616,#23617,#23618,#23619,#23620,#23621,#23622,#23623),
 .UNSPECIFIED.,.F.,.F.,(4,3,3,3,3,4),(0.,0.205219937404618,0.427055652806859,
0.649775003820693,0.85858873281681,1.),.UNSPECIFIED.);
#4604=B_SPLINE_CURVE_WITH_KNOTS('',3,(#23625,#23626,#23627,#23628,#23629,
#23630,#23631,#23632,#23633,#23634,#23635,#23636,#23637,#23638,#23639,#23640,
#23641,#23642,#23643,#23644,#23645,#23646,#23647,#23648,#23649,#23650,#23651,
#23652,#23653,#23654,#23655,#23656,#23657,#23658),.UNSPECIFIED.,.F.,.F.,
(4,3,3,3,3,3,3,3,3,3,3,4),(3.95987309064802E-11,0.121246835437639,0.253954725457755,
0.389090518462783,0.428552737847408,0.5,0.64046136439974,0.714295174771229,
0.75,0.841375267004841,0.933462324091106,1.),.UNSPECIFIED.);
#4605=B_SPLINE_CURVE_WITH_KNOTS('',3,(#23705,#23706,#23707,#23708,#23709,
#23710,#23711,#23712,#23713,#23714,#23715,#23716,#23717,#23718,#23719,#23720),
 .UNSPECIFIED.,.F.,.F.,(4,3,3,3,3,4),(1.8274244722615E-6,0.0154462354802323,
0.369508787994016,0.469179182796268,0.696045656454308,0.947114029846497),
 .UNSPECIFIED.);
#4606=B_SPLINE_CURVE_WITH_KNOTS('',3,(#23762,#23763,#23764,#23765,#23766,
#23767,#23768,#23769,#23770,#23771,#23772,#23773,#23774,#23775,#23776,#23777,
#23778,#23779,#23780,#23781,#23782,#23783,#23784,#23785,#23786,#23787,#23788,
#23789,#23790,#23791,#23792,#23793,#23794,#23795,#23796,#23797,#23798,#23799,
#23800,#23801,#23802,#23803,#23804,#23805,#23806,#23807,#23808,#23809,#23810,
#23811,#23812,#23813,#23814,#23815,#23816),.UNSPECIFIED.,.F.,.F.,(4,3,3,
3,3,3,3,3,3,3,3,3,3,3,3,3,3,3,4),(1.54298765101802E-11,0.0741368549968222,
0.147957859677495,0.166538391378985,0.240707667050476,0.25,0.32878609786754,
0.408715793634324,0.489675149043947,0.497227411236171,0.5,0.617588209823106,
0.662602504992496,0.75,0.827164511951168,0.903818961240129,0.979279490528545,
0.99331926318273,1.),.UNSPECIFIED.);
#4607=B_SPLINE_CURVE_WITH_KNOTS('',3,(#23842,#23843,#23844,#23845,#23846,
#23847,#23848),.UNSPECIFIED.,.F.,.F.,(4,3,4),(0.,0.956929571413153,1.),
 .UNSPECIFIED.);
#4608=B_SPLINE_CURVE_WITH_KNOTS('',3,(#23850,#23851,#23852,#23853,#23854,
#23855,#23856,#23857,#23858,#23859,#23860,#23861,#23862,#23863,#23864,#23865,
#23866,#23867,#23868,#23869,#23870,#23871),.UNSPECIFIED.,.F.,.F.,(4,3,3,
3,3,3,3,4),(4.96179436349366E-7,0.14864787734975,0.305968524364221,0.479476329552985,
0.644525520841946,0.802251202633433,0.948871479731742,0.999999745119276),
 .UNSPECIFIED.);
#4609=B_SPLINE_CURVE_WITH_KNOTS('',3,(#23900,#23901,#23902,#23903,#23904,
#23905,#23906,#23907,#23908,#23909,#23910,#23911,#23912,#23913,#23914,#23915,
#23916,#23917,#23918,#23919,#23920,#23921,#23922,#23923,#23924,#23925,#23926,
#23927),.UNSPECIFIED.,.F.,.F.,(4,3,3,3,3,3,3,3,3,4),(1.67806700377112E-13,
0.146169747085761,0.292246024114256,0.429741672249371,0.496977644310635,
0.5,0.639603085373147,0.784806435106521,0.929107451391001,0.999999088156523),
 .UNSPECIFIED.);
#4610=B_SPLINE_CURVE_WITH_KNOTS('',3,(#23928,#23929,#23930,#23931,#23932,
#23933,#23934,#23935,#23936,#23937,#23938,#23939,#23940,#23941,#23942,#23943,
#23944,#23945,#23946,#23947,#23948,#23949,#23950,#23951,#23952,#23953,#23954,
#23955,#23956,#23957,#23958,#23959,#23960,#23961),.UNSPECIFIED.,.F.,.F.,
(4,3,3,3,3,3,3,3,3,3,3,4),(5.68545075492776E-6,0.0996207130128548,0.201111048190332,
0.302263201147131,0.401375239099063,0.497507011565521,0.590172839225832,
0.679211000882343,0.762738185580774,0.843391420498228,0.921695710249114,
1.),.UNSPECIFIED.);
#4611=B_SPLINE_CURVE_WITH_KNOTS('',3,(#23986,#23987,#23988,#23989),
 .UNSPECIFIED.,.F.,.F.,(4,4),(0.,1.),.UNSPECIFIED.);
#4612=B_SPLINE_CURVE_WITH_KNOTS('',3,(#24307,#24308,#24309,#24310,#24311,
#24312,#24313,#24314,#24315,#24316,#24317,#24318,#24319,#24320,#24321,#24322,
#24323,#24324,#24325,#24326,#24327,#24328,#24329,#24330,#24331,#24332,#24333,
#24334,#24335,#24336,#24337,#24338,#24339,#24340,#24341,#24342,#24343,#24344,
#24345,#24346,#24347,#24348,#24349,#24350,#24351,#24352,#24353,#24354,#24355,
#24356,#24357,#24358,#24359,#24360,#24361,#24362,#24363,#24364,#24365,#24366,
#24367,#24368,#24369,#24370,#24371,#24372,#24373,#24374,#24375,#24376,#24377,
#24378,#24379,#24380,#24381,#24382,#24383,#24384,#24385,#24386,#24387,#24388,
#24389,#24390,#24391,#24392,#24393,#24394,#24395,#24396,#24397,#24398,#24399,
#24400,#24401,#24402,#24403,#24404,#24405,#24406,#24407,#24408,#24409,#24410,
#24411,#24412,#24413,#24414,#24415,#24416,#24417,#24418,#24419,#24420,#24421,
#24422,#24423,#24424,#24425,#24426,#24427,#24428,#24429,#24430,#24431,#24432,
#24433,#24434,#24435,#24436,#24437,#24438,#24439,#24440,#24441,#24442,#24443,
#24444,#24445,#24446,#24447,#24448,#24449,#24450,#24451,#24452,#24453,#24454,
#24455,#24456,#24457,#24458,#24459,#24460,#24461,#24462,#24463,#24464,#24465,
#24466,#24467,#24468,#24469,#24470,#24471,#24472,#24473,#24474,#24475,#24476,
#24477,#24478,#24479,#24480,#24481,#24482,#24483,#24484,#24485,#24486,#24487,
#24488,#24489,#24490,#24491,#24492,#24493,#24494,#24495,#24496,#24497,#24498,
#24499,#24500,#24501,#24502,#24503,#24504,#24505,#24506,#24507,#24508,#24509,
#24510,#24511,#24512,#24513,#24514,#24515,#24516,#24517,#24518,#24519,#24520,
#24521,#24522,#24523,#24524,#24525,#24526,#24527,#24528,#24529,#24530,#24531,
#24532,#24533,#24534,#24535,#24536,#24537,#24538,#24539,#24540,#24541,#24542,
#24543,#24544,#24545,#24546,#24547,#24548,#24549,#24550,#24551,#24552,#24553,
#24554,#24555,#24556,#24557,#24558,#24559,#24560,#24561,#24562,#24563,#24564,
#24565,#24566,#24567,#24568,#24569,#24570,#24571,#24572,#24573,#24574,#24575,
#24576,#24577,#24578,#24579,#24580,#24581,#24582,#24583,#24584,#24585,#24586,
#24587,#24588,#24589,#24590,#24591,#24592,#24593,#24594,#24595,#24596,#24597,
#24598,#24599,#24600,#24601,#24602,#24603,#24604,#24605,#24606,#24607,#24608,
#24609,#24610,#24611,#24612,#24613,#24614,#24615,#24616,#24617,#24618,#24619,
#24620,#24621,#24622,#24623,#24624,#24625,#24626,#24627,#24628,#24629,#24630,
#24631,#24632,#24633,#24634,#24635,#24636,#24637,#24638,#24639,#24640,#24641,
#24642,#24643,#24644,#24645,#24646,#24647,#24648,#24649,#24650,#24651,#24652,
#24653,#24654,#24655,#24656,#24657,#24658,#24659,#24660,#24661,#24662,#24663,
#24664,#24665,#24666,#24667,#24668,#24669,#24670,#24671,#24672,#24673,#24674,
#24675,#24676,#24677,#24678,#24679,#24680,#24681,#24682,#24683,#24684,#24685,
#24686,#24687,#24688,#24689,#24690,#24691,#24692,#24693,#24694,#24695,#24696,
#24697,#24698,#24699,#24700,#24701,#24702,#24703,#24704,#24705,#24706,#24707,
#24708,#24709,#24710,#24711,#24712,#24713,#24714,#24715,#24716,#24717,#24718,
#24719,#24720,#24721,#24722,#24723,#24724,#24725,#24726,#24727,#24728,#24729,
#24730,#24731,#24732,#24733,#24734,#24735,#24736,#24737,#24738,#24739,#24740,
#24741,#24742,#24743,#24744,#24745,#24746,#24747,#24748,#24749,#24750,#24751,
#24752,#24753,#24754,#24755,#24756,#24757,#24758,#24759,#24760,#24761,#24762,
#24763,#24764,#24765,#24766,#24767,#24768,#24769,#24770,#24771,#24772,#24773,
#24774,#24775,#24776,#24777,#24778,#24779,#24780,#24781,#24782,#24783,#24784,
#24785,#24786,#24787,#24788,#24789,#24790,#24791,#24792,#24793,#24794,#24795,
#24796,#24797,#24798,#24799,#24800,#24801,#24802,#24803,#24804,#24805,#24806,
#24807,#24808,#24809,#24810,#24811,#24812,#24813,#24814,#24815,#24816,#24817,
#24818,#24819,#24820,#24821,#24822,#24823,#24824,#24825,#24826,#24827,#24828,
#24829,#24830,#24831,#24832,#24833,#24834,#24835,#24836,#24837,#24838,#24839,
#24840,#24841,#24842,#24843,#24844,#24845,#24846,#24847,#24848,#24849,#24850,
#24851,#24852,#24853,#24854,#24855,#24856,#24857,#24858,#24859,#24860,#24861,
#24862,#24863,#24864,#24865,#24866,#24867,#24868,#24869,#24870,#24871,#24872,
#24873,#24874,#24875,#24876,#24877,#24878,#24879,#24880,#24881,#24882,#24883,
#24884,#24885,#24886,#24887,#24888,#24889,#24890,#24891,#24892,#24893,#24894,
#24895,#24896,#24897,#24898,#24899,#24900,#24901,#24902,#24903,#24904,#24905,
#24906,#24907,#24908,#24909,#24910,#24911,#24912,#24913,#24914,#24915,#24916,
#24917,#24918,#24919,#24920,#24921,#24922,#24923,#24924,#24925,#24926,#24927,
#24928,#24929,#24930,#24931,#24932,#24933,#24934,#24935,#24936,#24937,#24938,
#24939,#24940,#24941,#24942,#24943,#24944,#24945,#24946,#24947,#24948,#24949,
#24950,#24951,#24952,#24953,#24954,#24955,#24956,#24957,#24958,#24959,#24960,
#24961,#24962,#24963,#24964,#24965,#24966,#24967,#24968,#24969,#24970,#24971,
#24972,#24973,#24974,#24975,#24976,#24977,#24978,#24979,#24980,#24981,#24982,
#24983,#24984,#24985,#24986,#24987,#24988,#24989,#24990,#24991,#24992,#24993,
#24994,#24995,#24996,#24997,#24998,#24999,#25000,#25001,#25002,#25003,#25004,
#25005,#25006,#25007,#25008,#25009,#25010,#25011,#25012,#25013,#25014,#25015,
#25016,#25017,#25018,#25019,#25020,#25021,#25022,#25023,#25024,#25025,#25026,
#25027,#25028,#25029,#25030,#25031,#25032,#25033,#25034,#25035,#25036,#25037,
#25038,#25039,#25040,#25041,#25042,#25043,#25044,#25045,#25046,#25047,#25048,
#25049,#25050,#25051,#25052,#25053,#25054,#25055,#25056,#25057,#25058,#25059,
#25060,#25061,#25062,#25063,#25064,#25065,#25066,#25067,#25068,#25069,#25070,
#25071,#25072,#25073,#25074,#25075,#25076,#25077,#25078,#25079,#25080,#25081,
#25082,#25083,#25084,#25085,#25086,#25087,#25088,#25089,#25090,#25091,#25092,
#25093,#25094,#25095,#25096,#25097,#25098,#25099,#25100,#25101,#25102,#25103,
#25104,#25105,#25106,#25107,#25108,#25109,#25110,#25111,#25112,#25113,#25114,
#25115,#25116,#25117,#25118,#25119,#25120,#25121,#25122,#25123,#25124,#25125,
#25126,#25127,#25128,#25129,#25130,#25131,#25132,#25133,#25134,#25135,#25136,
#25137,#25138,#25139,#25140,#25141,#25142,#25143,#25144,#25145,#25146,#25147,
#25148,#25149,#25150,#25151,#25152,#25153,#25154,#25155,#25156,#25157,#25158,
#25159,#25160,#25161,#25162,#25163,#25164,#25165,#25166,#25167,#25168,#25169,
#25170,#25171,#25172,#25173,#25174,#25175,#25176,#25177,#25178,#25179,#25180,
#25181,#25182,#25183,#25184,#25185,#25186,#25187,#25188,#25189,#25190,#25191,
#25192,#25193,#25194,#25195,#25196,#25197,#25198,#25199,#25200,#25201,#25202,
#25203,#25204,#25205,#25206,#25207,#25208,#25209,#25210,#25211,#25212,#25213,
#25214,#25215,#25216,#25217,#25218,#25219,#25220,#25221,#25222,#25223,#25224,
#25225,#25226,#25227,#25228,#25229,#25230,#25231,#25232,#25233,#25234,#25235,
#25236,#25237,#25238,#25239,#25240,#25241,#25242,#25243,#25244,#25245,#25246,
#25247,#25248,#25249,#25250,#25251,#25252,#25253,#25254,#25255,#25256,#25257,
#25258,#25259,#25260,#25261,#25262,#25263,#25264,#25265,#25266,#25267,#25268,
#25269,#25270,#25271,#25272,#25273,#25274,#25275,#25276,#25277,#25278,#25279,
#25280,#25281,#25282,#25283,#25284,#25285,#25286,#25287,#25288,#25289,#25290,
#25291,#25292,#25293,#25294,#25295,#25296,#25297,#25298,#25299,#25300,#25301,
#25302,#25303,#25304,#25305,#25306,#25307,#25308,#25309,#25310,#25311,#25312,
#25313,#25314,#25315,#25316,#25317,#25318,#25319,#25320,#25321,#25322,#25323,
#25324,#25325,#25326,#25327,#25328,#25329,#25330,#25331,#25332,#25333,#25334,
#25335,#25336,#25337,#25338,#25339,#25340,#25341,#25342,#25343,#25344,#25345,
#25346,#25347,#25348,#25349,#25350,#25351,#25352,#25353,#25354,#25355,#25356,
#25357,#25358,#25359,#25360,#25361,#25362,#25363,#25364,#25365,#25366,#25367,
#25368,#25369,#25370,#25371,#25372,#25373,#25374,#25375,#25376,#25377,#25378,
#25379,#25380,#25381,#25382,#25383,#25384,#25385,#25386,#25387,#25388,#25389,
#25390,#25391,#25392,#25393,#25394,#25395,#25396,#25397,#25398,#25399,#25400,
#25401,#25402,#25403,#25404,#25405,#25406,#25407,#25408,#25409,#25410,#25411,
#25412,#25413,#25414,#25415,#25416,#25417,#25418,#25419,#25420,#25421,#25422,
#25423),.UNSPECIFIED.,.F.,.F.,(4,3,3,3,3,3,3,3,3,3,3,3,3,3,3,3,3,3,3,3,
3,3,3,3,3,3,3,3,3,3,3,3,3,3,3,3,3,3,3,3,3,3,3,3,3,3,3,3,3,3,3,3,3,3,3,3,
3,3,3,3,3,3,3,3,3,3,3,3,3,3,3,3,3,3,3,3,3,3,3,3,3,3,3,3,3,3,3,3,3,3,3,3,
3,3,3,3,3,3,3,3,3,3,3,3,3,3,3,3,3,3,3,3,3,3,3,3,3,3,3,3,3,3,3,3,3,3,3,3,
3,3,3,3,3,3,3,3,3,3,3,3,3,3,3,3,3,3,3,3,3,3,3,3,3,3,3,3,3,3,3,3,3,3,3,3,
3,3,3,3,3,3,3,3,3,3,3,3,3,3,3,3,3,3,3,3,3,3,3,3,3,3,3,3,3,3,3,3,3,3,3,3,
3,3,3,3,3,3,3,3,3,3,3,3,3,3,3,3,3,3,3,3,3,3,3,3,3,3,3,3,3,3,3,3,3,3,3,3,
3,3,3,3,3,3,3,3,3,3,3,3,3,3,3,3,3,3,3,3,3,3,3,3,3,3,3,3,3,3,3,3,3,3,3,3,
3,3,3,3,3,3,3,3,3,3,3,3,3,3,3,3,3,3,3,3,3,3,3,3,3,3,3,3,3,3,3,3,3,3,3,3,
3,3,3,3,3,3,3,3,3,3,3,3,3,3,3,3,3,3,3,3,3,3,3,3,3,3,3,3,3,3,3,3,3,3,3,3,
3,3,3,3,3,3,3,3,3,3,3,3,3,3,3,3,3,3,3,3,3,3,3,3,3,3,3,3,4),(1.41928136162631E-16,
0.00375696390641211,0.00752684164528003,0.0112054980983414,0.0136181732032628,
0.015625,0.0187763337417752,0.0219657525518695,0.0251434697021319,0.0272386136793649,
0.0304274841167886,0.03125,0.0342418752009903,0.0372600147028987,0.0402631653292154,
0.040858565127175,0.0438706093731097,0.046875,0.0497854558141847,0.0527238721969246,
0.0544806852832602,0.0574167358074777,0.0603354438746542,0.0625,0.0655363953210283,
0.0681027980099195,0.0711368361228969,0.0741797898137324,0.0771806063751703,
0.078125,0.0814260580992338,0.0817240272185027,0.0850137731230535,0.0883281148593535,
0.0915998588244272,0.09375,0.0953440436439535,0.0989470875389966,0.102589664708513,
0.1061848342496,0.108963479456695,0.109375,0.11286350566101,0.116393688137756,
0.119890019915786,0.122582603581427,0.125,0.128144727152752,0.131321029900682,
0.134477003637553,0.136202062883425,0.139370689871728,0.140625,0.143574681618784,
0.146698754258456,0.149663751831495,0.149822826898128,0.15280254922935,
0.155756457245652,0.15625,0.159173539410455,0.162124467054557,0.163444689688989,
0.166392236205501,0.169323945574085,0.171875,0.174949714517587,0.177066478589228,
0.180137405522732,0.183219859178605,0.186259957793737,0.1875,0.190687354024594,
0.194048341988694,0.197436889817656,0.200781184492982,0.203125,0.204307358170882,
0.207930737472123,0.211595768741423,0.215215406107755,0.217926971624089,
0.21875,0.222166407342437,0.225621796187244,0.229045740737219,0.231546281492748,
0.234375,0.237464780831143,0.240585147038328,0.243688087716581,0.245166047239679,
0.248280114022016,0.25,0.252930620883487,0.255889867251581,0.25878702839893,
0.261746853209659,0.264683020622951,0.265625,0.268561266539308,0.271524781760025,
0.272408783413451,0.275367449496128,0.278312630725382,0.28125,0.284373579372741,
0.286030179662186,0.289148425813216,0.292281034577153,0.29537096374333,
0.296875,0.299650647066103,0.303085947856422,0.306551325013317,0.309969690909747,
0.3125,0.313270615345845,0.316887702230403,0.320547816609901,0.324165197624559,
0.326890379258416,0.328125,0.331467289185054,0.334846324082606,0.338196907122451,
0.340509929185386,0.34375,0.34679266416236,0.349865030813324,0.352922450948991,
0.354130070718765,0.357197335240415,0.359375,0.362293490074415,0.365240504076861,
0.367751289618998,0.370697995733301,0.373623242378673,0.375,0.377955890053764,
0.380938963353802,0.381372916864455,0.384349464100079,0.387330231573066,
0.390269181138841,0.390625,0.39380472806983,0.394993901529091,0.398166537371781,
0.401356571680003,0.404503530786965,0.40625,0.408613963419633,0.412121217124854,
0.41566070864792,0.419149738179077,0.421875,0.422233835937685,0.425822468642722,
0.429454938622567,0.433047991180155,0.435853704908176,0.4375,0.440768977088949,
0.444072862829685,0.447351589563799,0.449473545313588,0.452768155232365,
0.453125,0.456128768633068,0.459161446140842,0.46218123106787,0.463094108396904,
0.46612268239381,0.46875,0.471662990806611,0.47460440591405,0.47671557487405,
0.479655636592081,0.482576489089444,0.484375,0.487378154483202,0.490337065998658,
0.493338806184672,0.496347378039292,0.499314240701098,0.5,0.503242271855102,
0.503957640564395,0.507190856336537,0.510444625767474,0.513654725768776,
0.515625,0.51757733758382,0.521146913752069,0.524750694704712,0.528300915568497,
0.531197055769351,0.53125,0.53479000686609,0.538373841378633,0.541921955994817,
0.544816965827551,0.546875,0.550074870689625,0.553308090229274,0.55651936022586,
0.558437132275019,0.56166234532983,0.5625,0.565472701085472,0.568473602185721,
0.571463297966407,0.572058137208491,0.575091568604246,0.578125,0.581039146617377,
0.583981625304953,0.585679847853384,0.588619762880798,0.591542785096886,
0.59375,0.596786943127786,0.599301200589572,0.602335511655717,0.605379392333546,
0.608381654459508,0.609375,0.612685932455034,0.612921394984571,0.61622110240222,
0.619544634516214,0.622823650202063,0.625,0.626540784496337,0.630152313228458,
0.633800924541454,0.63739773297194,0.640160327298832,0.640625,0.644104192605316,
0.647623254248517,0.651106360713018,0.65378020247688,0.65625,0.659387964286102,
0.662557838982797,0.665708508118498,0.667400692153731,0.670563658118169,
0.671875,0.674823511630078,0.677922826046867,0.681022140463656,0.684001393380945,
0.686955894682086,0.6875,0.690422237543528,0.693372719902255,0.694644072063433,
0.697590612474237,0.70052264369452,0.703125,0.70620324539794,0.708265290349425,
0.711339488377982,0.714426140886959,0.717471232073899,0.71875,0.72188515874666,
0.725256519576212,0.72865507786861,0.732007973205593,0.734375,0.735504308795299,
0.739133848397955,0.742802529200647,0.746421428018016,0.749123675935082,
0.75,0.753408276571443,0.756853505223839,0.76026473255161,0.762743470631604,
0.765625,0.76870946107265,0.771824433888116,0.77492234212563,0.776364234174157,
0.779473103835279,0.78125,0.784180457264217,0.787140398278875,0.789986106432661,
0.792946292081806,0.795883810346005,0.796875,0.799812554586143,0.802778267638442,
0.803608214164438,0.806568435470589,0.809534217735295,0.8125,0.815627126793862,
0.817229307762569,0.820350760602539,0.8234877220766,0.826583125041477,0.828125,
0.830848920745414,0.834294315342887,0.837770245429024,0.841198956422805,
0.84375,0.844467906307861,0.848089494944701,0.851751749669817,0.855367152735499,
0.858087103438474,0.859375,0.862710013689627,0.866079919398144,0.86941903262148,
0.871706822083203,0.875,0.878038837677074,0.881106887755998,0.884159598418118,
0.885327787691308,0.8883903620407,0.890625,0.893543292039961,0.896490745567291,
0.898950017485599,0.901896840531358,0.904823081059482,0.90625,0.909211343332264,
0.912200851457754,0.912572256446531,0.915554501262814,0.918542007615605,
0.921488453395028,0.921875,0.925059442848262,0.926193232248328,0.929370141219461,
0.932565775938607,0.935719703673268,0.9375,0.939812662652397,0.943297271478577,
0.946814136222421,0.950281612142674,0.953125,0.953431479837767,0.957169839912613,
0.960956945359794,0.96470194571003,0.967050969923035,0.96875,0.971853047895934,
0.974982346231087,0.978081813048667,0.980669488749458,0.983782801800532,
0.984375,0.987621590944549,0.990957253660972,0.994292916377395,0.997607886512429,
1.),.UNSPECIFIED.);
#4613=B_SPLINE_CURVE_WITH_KNOTS('',3,(#25425,#25426,#25427,#25428,#25429,
#25430,#25431,#25432,#25433,#25434,#25435,#25436,#25437,#25438,#25439,#25440,
#25441,#25442,#25443,#25444,#25445,#25446,#25447,#25448,#25449,#25450,#25451,
#25452,#25453,#25454,#25455,#25456,#25457,#25458,#25459,#25460,#25461,#25462,
#25463,#25464,#25465,#25466,#25467,#25468,#25469,#25470,#25471,#25472,#25473,
#25474,#25475,#25476,#25477,#25478,#25479,#25480,#25481,#25482,#25483,#25484,
#25485,#25486,#25487,#25488,#25489,#25490,#25491,#25492,#25493,#25494,#25495,
#25496,#25497,#25498,#25499,#25500,#25501,#25502,#25503,#25504,#25505,#25506,
#25507,#25508,#25509,#25510,#25511,#25512,#25513,#25514,#25515,#25516,#25517,
#25518,#25519,#25520,#25521,#25522,#25523,#25524,#25525,#25526,#25527,#25528,
#25529,#25530,#25531,#25532,#25533,#25534,#25535,#25536,#25537,#25538,#25539,
#25540,#25541,#25542,#25543,#25544,#25545,#25546,#25547,#25548,#25549,#25550,
#25551,#25552,#25553,#25554,#25555,#25556,#25557,#25558,#25559,#25560,#25561,
#25562,#25563,#25564,#25565,#25566,#25567,#25568,#25569,#25570,#25571,#25572,
#25573,#25574,#25575,#25576,#25577,#25578,#25579,#25580,#25581,#25582,#25583,
#25584,#25585,#25586,#25587,#25588,#25589,#25590,#25591,#25592,#25593,#25594,
#25595,#25596,#25597,#25598,#25599,#25600,#25601,#25602,#25603,#25604,#25605,
#25606,#25607,#25608,#25609,#25610,#25611,#25612,#25613,#25614,#25615,#25616,
#25617,#25618,#25619,#25620,#25621,#25622,#25623,#25624,#25625,#25626,#25627,
#25628,#25629,#25630,#25631,#25632,#25633,#25634,#25635,#25636,#25637,#25638,
#25639,#25640,#25641,#25642,#25643,#25644,#25645,#25646,#25647,#25648,#25649,
#25650,#25651,#25652,#25653,#25654,#25655,#25656,#25657,#25658,#25659,#25660,
#25661,#25662,#25663,#25664,#25665,#25666,#25667,#25668,#25669,#25670,#25671,
#25672,#25673,#25674,#25675,#25676,#25677,#25678,#25679,#25680,#25681,#25682,
#25683,#25684,#25685,#25686,#25687,#25688,#25689,#25690,#25691,#25692,#25693,
#25694,#25695,#25696,#25697,#25698,#25699,#25700,#25701,#25702,#25703,#25704,
#25705,#25706,#25707,#25708,#25709,#25710,#25711,#25712,#25713,#25714,#25715,
#25716,#25717,#25718,#25719,#25720,#25721,#25722,#25723,#25724,#25725,#25726,
#25727,#25728,#25729,#25730,#25731,#25732,#25733,#25734,#25735,#25736,#25737,
#25738,#25739,#25740,#25741,#25742,#25743,#25744,#25745,#25746,#25747,#25748,
#25749,#25750,#25751,#25752,#25753,#25754,#25755,#25756,#25757,#25758,#25759,
#25760,#25761,#25762,#25763,#25764,#25765,#25766,#25767,#25768,#25769,#25770,
#25771,#25772,#25773,#25774,#25775,#25776,#25777,#25778,#25779,#25780,#25781,
#25782,#25783,#25784,#25785,#25786,#25787,#25788,#25789,#25790,#25791,#25792,
#25793,#25794,#25795,#25796,#25797,#25798,#25799,#25800,#25801,#25802,#25803,
#25804,#25805,#25806,#25807,#25808,#25809,#25810,#25811,#25812,#25813,#25814,
#25815,#25816,#25817,#25818,#25819,#25820,#25821,#25822,#25823,#25824,#25825,
#25826,#25827,#25828,#25829,#25830,#25831,#25832,#25833,#25834,#25835,#25836,
#25837,#25838,#25839,#25840,#25841,#25842,#25843,#25844,#25845,#25846,#25847,
#25848,#25849,#25850,#25851,#25852,#25853,#25854,#25855,#25856,#25857,#25858,
#25859,#25860,#25861,#25862,#25863,#25864,#25865,#25866,#25867,#25868,#25869,
#25870,#25871,#25872,#25873,#25874,#25875,#25876,#25877,#25878,#25879,#25880,
#25881,#25882,#25883,#25884,#25885,#25886,#25887,#25888,#25889,#25890,#25891,
#25892,#25893,#25894,#25895,#25896,#25897,#25898,#25899,#25900,#25901,#25902,
#25903,#25904,#25905,#25906,#25907,#25908,#25909,#25910,#25911,#25912,#25913,
#25914,#25915,#25916,#25917,#25918,#25919,#25920,#25921,#25922,#25923,#25924,
#25925,#25926,#25927,#25928,#25929,#25930,#25931,#25932,#25933,#25934,#25935,
#25936,#25937,#25938,#25939,#25940,#25941,#25942,#25943,#25944,#25945,#25946,
#25947,#25948,#25949,#25950,#25951,#25952,#25953,#25954,#25955,#25956,#25957,
#25958,#25959,#25960,#25961,#25962,#25963,#25964,#25965,#25966,#25967,#25968,
#25969,#25970,#25971,#25972,#25973,#25974,#25975,#25976,#25977,#25978,#25979,
#25980,#25981,#25982,#25983,#25984,#25985,#25986,#25987,#25988,#25989,#25990,
#25991,#25992,#25993,#25994,#25995,#25996,#25997,#25998,#25999,#26000,#26001,
#26002,#26003,#26004,#26005,#26006,#26007,#26008,#26009,#26010,#26011,#26012,
#26013,#26014,#26015,#26016,#26017,#26018,#26019,#26020,#26021,#26022,#26023,
#26024,#26025,#26026,#26027,#26028,#26029,#26030,#26031,#26032,#26033,#26034,
#26035,#26036,#26037,#26038,#26039,#26040,#26041,#26042,#26043,#26044,#26045,
#26046,#26047,#26048,#26049,#26050,#26051,#26052,#26053,#26054,#26055,#26056,
#26057,#26058,#26059,#26060,#26061,#26062,#26063,#26064,#26065,#26066,#26067,
#26068,#26069,#26070,#26071,#26072,#26073,#26074,#26075,#26076,#26077,#26078,
#26079,#26080,#26081,#26082,#26083,#26084,#26085,#26086,#26087,#26088,#26089,
#26090,#26091,#26092,#26093,#26094,#26095,#26096,#26097,#26098,#26099,#26100,
#26101,#26102,#26103,#26104,#26105,#26106,#26107,#26108,#26109,#26110,#26111,
#26112,#26113,#26114,#26115,#26116,#26117,#26118,#26119,#26120,#26121,#26122,
#26123,#26124,#26125,#26126,#26127,#26128,#26129,#26130,#26131,#26132,#26133,
#26134,#26135,#26136,#26137,#26138,#26139,#26140,#26141,#26142,#26143,#26144,
#26145,#26146,#26147,#26148,#26149,#26150,#26151,#26152,#26153,#26154,#26155,
#26156,#26157,#26158,#26159,#26160,#26161,#26162,#26163,#26164,#26165,#26166,
#26167,#26168,#26169,#26170,#26171,#26172,#26173,#26174,#26175,#26176,#26177,
#26178,#26179,#26180,#26181,#26182,#26183,#26184,#26185,#26186,#26187,#26188,
#26189,#26190,#26191,#26192,#26193,#26194,#26195,#26196,#26197,#26198,#26199,
#26200,#26201,#26202,#26203,#26204,#26205,#26206,#26207,#26208),
 .UNSPECIFIED.,.F.,.F.,(4,3,3,3,3,3,3,3,3,3,3,3,3,3,3,3,3,3,3,3,3,3,3,3,
3,3,3,3,3,3,3,3,3,3,3,3,3,3,3,3,3,3,3,3,3,3,3,3,3,3,3,3,3,3,3,3,3,3,3,3,
3,3,3,3,3,3,3,3,3,3,3,3,3,3,3,3,3,3,3,3,3,3,3,3,3,3,3,3,3,3,3,3,3,3,3,3,
3,3,3,3,3,3,3,3,3,3,3,3,3,3,3,3,3,3,3,3,3,3,3,3,3,3,3,3,3,3,3,3,3,3,3,3,
3,3,3,3,3,3,3,3,3,3,3,3,3,3,3,3,3,3,3,3,3,3,3,3,3,3,3,3,3,3,3,3,3,3,3,3,
3,3,3,3,3,3,3,3,3,3,3,3,3,3,3,3,3,3,3,3,3,3,3,3,3,3,3,3,3,3,3,3,3,3,3,3,
3,3,3,3,3,3,3,3,3,3,3,3,3,3,3,3,3,3,3,3,3,3,3,3,3,3,3,3,3,3,3,3,3,3,3,3,
3,3,3,3,3,3,3,3,3,3,3,3,3,3,3,3,3,3,3,3,3,4),(5.21713545800312E-10,0.00354828579781762,
0.00710828663937958,0.0105988682281013,0.0129499349020049,0.0156138834492466,
0.0185175553119484,0.0214527132972935,0.0243781008771642,0.0260266797555571,
0.0289576215021701,0.0312277663767797,0.0340404063014597,0.0368845587995058,
0.0391047670345649,0.0419476409868396,0.044769375035249,0.0468416493043128,
0.049776455469988,0.0521828642949208,0.0551160494798377,0.058060655259635,
0.0609653655072801,0.0624555322318459,0.0652584232737492,0.0684611712451566,
0.0716599356786169,0.074864675418998,0.078069415159379,0.0783323148463787,
0.0816007511565432,0.0848933318019858,0.0881535022505418,0.0914060600870365,
0.0936832980869121,0.0966183866140598,0.0995838057543901,0.102535532422586,
0.104481157312076,0.107439711192641,0.109297181014445,0.112116940613904,
0.114967762221302,0.117558913705969,0.120409398013197,0.123236043047447,
0.124911063941978,0.127820798148354,0.130637498684429,0.133547101786304,
0.136465643961824,0.139343621115296,0.140524946869511,0.143713742393272,
0.146847368620144,0.150004383721533,0.153122776711414,0.156138829797044,
0.15678799737098,0.160100722889956,0.163451877063563,0.166764651060016,
0.169861705997999,0.171752712724577,0.174708789418846,0.177696026971132,
0.180669051209219,0.182936249951031,0.185914351421853,0.187366595652111,
0.190186998230306,0.193100159867727,0.196013321505149,0.198864848884166,
0.201690928017717,0.202980478579644,0.205850811170917,0.208752059158429,
0.209091807316328,0.211985670568728,0.21488521416041,0.217742522470107,
0.218594361507177,0.221708442703935,0.222168753849,0.225275246734319,0.228404532893667,
0.231494367336685,0.23420824443471,0.235243482553823,0.238585866562088,
0.24196678012863,0.245306617966617,0.248317406234458,0.249822127362243,
0.252794468291234,0.255798081384818,0.258787382320768,0.26139162390659,
0.264381640001098,0.265436010289776,0.268261146075179,0.271114114602458,
0.273960051619525,0.274468059204635,0.277325296838419,0.280156111763791,
0.281049893217309,0.283903096474783,0.286786706688772,0.287546161401865,
0.290424373857708,0.293305159118511,0.29614259300166,0.296663776144842,
0.299740970295839,0.300623445458847,0.30369403137697,0.306784851366291,
0.309835198109392,0.312277659072375,0.313698685718145,0.317037761086691,
0.320415009368913,0.323751353170314,0.326772984627356,0.327891541999908,
0.330898801636563,0.333937758586751,0.336961278714864,0.339847159163855,
0.342867683050729,0.343505424927441,0.346340174452161,0.349203295466231,
0.352058787709793,0.352923069030268,0.355790867883161,0.358631129935423,
0.359119307854974,0.361957579377119,0.364826495324129,0.366000800977392,
0.368865682446108,0.371799436614308,0.374733190782508,0.377772601238001,
0.379078022236913,0.382112722378028,0.38516408722056,0.388173119931632,
0.390347073710041,0.392153612982227,0.395464260838178,0.398811128339243,
0.402117786826691,0.405228303040496,0.405960956637574,0.409046386498073,
0.412144273879551,0.415223982115581,0.418302676079569,0.421378344193257,
0.421574839565107,0.424428010543085,0.427310406381628,0.43018428020501,
0.431378281734012,0.434283502113326,0.43718872249264,0.440007503886808,
0.442856881101358,0.444455691178887,0.44730215881344,0.450130999964483,
0.452802605420173,0.455800192404467,0.457532795210628,0.460527731295469,
0.46353653691632,0.466502726551058,0.468416488347706,0.47060837909131,0.473877114165706,
0.477174162998506,0.480429722494675,0.483683319388895,0.484030371275239,
0.487212285624201,0.490378044328155,0.493568036499621,0.496758028671088,
0.499644254202772,0.502525951558283,0.505437757862282,0.508339797632585,
0.509833537737085,0.512739820225407,0.515258137130305,0.51806267368968,
0.520897904998006,0.522910756777942,0.525744037846389,0.528558233759491,
0.530872020057839,0.533823032707255,0.535987840270655,0.53893808924277,
0.541899785678102,0.544819746191919,0.546485902985372,0.549063259015498,
0.55232239073985,0.555554308990732,0.558827047451818,0.562099785912905,
0.562138153785135,0.565406888596543,0.568628840351947,0.571920966691356,
0.575213093030766,0.577713668840438,0.580629924690218,0.583577370457504,
0.586513674504404,0.588288694010538,0.591229553291057,0.593327551767971,
0.596130086248951,0.598963821638928,0.601365878235218,0.604198457117794,
0.607010366867197,0.608941434695504,0.611847682128247,0.614443059734324,
0.617349531327642,0.62026495285221,0.623139228237836,0.624555317623037,
0.62751843552106,0.630681126778437,0.633832352557778,0.637000776554174,
0.64016920055057,0.640593022256258,0.643861742384344,0.647167534798097,
0.650439394691147,0.653667902768602,0.655783083478103,0.658733344644451,
0.661715903717261,0.664686027966374,0.666743636472133,0.669719129865912,
0.671396966405636,0.674207710224785,0.67705038262821,0.679820894193192,
0.682663079268105,0.685339350694162),.UNSPECIFIED.);
#4614=B_SPLINE_CURVE_WITH_KNOTS('',3,(#26210,#26211,#26212,#26213,#26214,
#26215,#26216,#26217,#26218,#26219,#26220,#26221,#26222,#26223,#26224,#26225,
#26226,#26227,#26228,#26229,#26230,#26231,#26232,#26233,#26234,#26235,#26236,
#26237,#26238,#26239,#26240,#26241,#26242,#26243,#26244,#26245,#26246,#26247,
#26248,#26249,#26250,#26251,#26252,#26253,#26254,#26255,#26256,#26257,#26258,
#26259,#26260,#26261,#26262,#26263,#26264,#26265,#26266,#26267,#26268,#26269,
#26270,#26271,#26272,#26273,#26274,#26275,#26276,#26277,#26278,#26279,#26280,
#26281,#26282),.UNSPECIFIED.,.F.,.F.,(4,3,3,3,3,3,3,3,3,3,3,3,3,3,3,3,3,
3,3,3,3,3,3,3,4),(0.685339350694162,0.687010849333169,0.689954596488536,
0.692898343643902,0.695774057994242,0.698656554817308,0.701498103119844,
0.702624732260702,0.705679817832584,0.705973867056844,0.709040054089692,
0.712122006168352,0.715180310678293,0.718238615188235,0.719048124821964,
0.722380877936254,0.725751345763809,0.729080164892799,0.732122698361991,
0.733852498115769,0.736834315182431,0.739848626668011,0.742848293411596,
0.745198293043722,0.748063493984385),.UNSPECIFIED.);
#4615=B_SPLINE_CURVE_WITH_KNOTS('',3,(#26283,#26284,#26285,#26286,#26287,
#26288,#26289,#26290,#26291,#26292,#26293,#26294,#26295,#26296,#26297,#26298,
#26299,#26300,#26301,#26302,#26303,#26304,#26305,#26306,#26307,#26308,#26309,
#26310,#26311,#26312,#26313,#26314,#26315,#26316,#26317,#26318,#26319,#26320,
#26321,#26322,#26323,#26324,#26325,#26326,#26327,#26328,#26329,#26330,#26331,
#26332,#26333,#26334,#26335,#26336,#26337,#26338,#26339,#26340,#26341,#26342,
#26343,#26344,#26345,#26346,#26347,#26348,#26349,#26350,#26351,#26352,#26353,
#26354,#26355,#26356,#26357,#26358,#26359,#26360,#26361,#26362,#26363,#26364,
#26365,#26366,#26367,#26368,#26369,#26370,#26371,#26372,#26373,#26374,#26375,
#26376,#26377,#26378,#26379,#26380,#26381,#26382,#26383,#26384,#26385,#26386,
#26387,#26388,#26389,#26390,#26391,#26392,#26393,#26394,#26395,#26396,#26397,
#26398,#26399,#26400,#26401,#26402,#26403,#26404,#26405,#26406,#26407,#26408,
#26409,#26410,#26411,#26412,#26413,#26414,#26415,#26416,#26417,#26418,#26419,
#26420,#26421,#26422,#26423,#26424,#26425,#26426,#26427,#26428,#26429,#26430,
#26431,#26432,#26433,#26434,#26435,#26436,#26437,#26438,#26439,#26440,#26441,
#26442,#26443,#26444,#26445,#26446,#26447,#26448,#26449,#26450,#26451,#26452,
#26453,#26454,#26455,#26456,#26457,#26458,#26459,#26460,#26461,#26462,#26463,
#26464,#26465,#26466,#26467,#26468,#26469,#26470,#26471,#26472,#26473,#26474,
#26475,#26476,#26477,#26478,#26479,#26480,#26481,#26482,#26483,#26484,#26485,
#26486,#26487,#26488,#26489,#26490,#26491,#26492,#26493,#26494,#26495,#26496,
#26497,#26498,#26499,#26500,#26501,#26502,#26503,#26504,#26505,#26506,#26507,
#26508,#26509,#26510,#26511,#26512,#26513,#26514,#26515,#26516,#26517,#26518,
#26519,#26520,#26521,#26522,#26523,#26524,#26525,#26526,#26527,#26528,#26529,
#26530,#26531,#26532,#26533,#26534,#26535,#26536,#26537,#26538,#26539,#26540,
#26541,#26542,#26543,#26544,#26545,#26546,#26547,#26548,#26549,#26550,#26551,
#26552,#26553,#26554,#26555,#26556,#26557,#26558,#26559,#26560,#26561,#26562,
#26563,#26564,#26565,#26566,#26567,#26568,#26569,#26570,#26571,#26572,#26573,
#26574,#26575,#26576,#26577,#26578,#26579,#26580,#26581,#26582,#26583,#26584,
#26585,#26586,#26587,#26588,#26589),.UNSPECIFIED.,.F.,.F.,(4,3,3,3,3,3,
3,3,3,3,3,3,3,3,3,3,3,3,3,3,3,3,3,3,3,3,3,3,3,3,3,3,3,3,3,3,3,3,3,3,3,3,
3,3,3,3,3,3,3,3,3,3,3,3,3,3,3,3,3,3,3,3,3,3,3,3,3,3,3,3,3,3,3,3,3,3,3,3,
3,3,3,3,3,3,3,3,3,3,3,3,3,3,3,3,3,3,3,3,3,3,3,3,4),(0.748063493984385,0.749466381043302,
0.752288397275229,0.755282054439133,0.758275711603037,0.761130825973309,
0.763961668260118,0.765080263970835,0.767917352828109,0.77078422020552,
0.771353525732745,0.774213115312669,0.777077472777137,0.779900849725931,
0.780694146898368,0.783691737022404,0.784429425880107,0.787434289900852,
0.790455274183734,0.793441944694404,0.796308029825901,0.797503531108534,
0.8008826666295,0.804300742313206,0.807673425168542,0.810577706635317,0.811921912753434,
0.814921908457005,0.817953794329053,0.820969598268473,0.823652851398742,
0.826672946786272,0.827535795680967,0.830368715715003,0.83323068339068,
0.836086554772167,0.836730234930176,0.839596991628881,0.842437634786699,
0.8431496786085,0.84597298482582,0.848826454864861,0.849808477323642,0.852656216107013,
0.855506694905312,0.858316209636458,0.858763561536033,0.861718711972506,
0.862884953167884,0.865844984221979,0.868818997765969,0.871757975408604,
0.874377444463566,0.875959161065365,0.87935003988753,0.882780453561134,
0.886164693772721,0.889032996323821,0.889991327391099,0.8930204016104,0.896053432227271,
0.899080528247788,0.902107624268305,0.90512345292396,0.905605210318633,
0.908448992089436,0.91132141880431,0.914185772695327,0.915184515182374,
0.91820180421427,0.921049520331464,0.921219093246166,0.924033384325258,
0.926878720218151,0.928263129897127,0.93110410784118,0.933968542007439,
0.936832976173699,0.939753081901854,0.941340243045271,0.944262184458778,
0.947196274607416,0.950093587166673,0.952446859101232,0.954414891442,0.957833316676536,
0.96129327774432,0.964716233068322,0.967488787168961,0.968060742028765,
0.97097514730093,0.973954144630719,0.976929487902561,0.979858306144715,
0.980561813590268,0.983515297762278,0.983674624956298,0.986760534731973,
0.989895063215076,0.993039826328926,0.993640907070132,0.996780514810444,
0.999288507883831),.UNSPECIFIED.);
#4616=B_SPLINE_CURVE_WITH_KNOTS('',3,(#27271,#27272,#27273,#27274,#27275,
#27276,#27277,#27278,#27279,#27280,#27281,#27282,#27283,#27284,#27285,#27286,
#27287,#27288,#27289,#27290,#27291,#27292,#27293,#27294,#27295,#27296,#27297,
#27298,#27299,#27300,#27301,#27302,#27303,#27304,#27305,#27306,#27307,#27308,
#27309,#27310,#27311,#27312,#27313,#27314,#27315,#27316,#27317,#27318,#27319,
#27320,#27321,#27322,#27323,#27324,#27325,#27326,#27327,#27328,#27329,#27330,
#27331,#27332,#27333,#27334,#27335,#27336,#27337,#27338,#27339,#27340,#27341,
#27342,#27343,#27344,#27345,#27346,#27347,#27348,#27349,#27350,#27351,#27352,
#27353,#27354,#27355,#27356,#27357,#27358,#27359,#27360,#27361,#27362,#27363,
#27364,#27365,#27366,#27367,#27368,#27369,#27370,#27371,#27372,#27373,#27374,
#27375,#27376,#27377,#27378,#27379,#27380,#27381,#27382,#27383,#27384,#27385,
#27386,#27387,#27388,#27389,#27390,#27391,#27392,#27393,#27394,#27395,#27396,
#27397,#27398,#27399,#27400,#27401,#27402,#27403,#27404,#27405,#27406,#27407,
#27408,#27409,#27410,#27411,#27412,#27413,#27414,#27415,#27416,#27417,#27418,
#27419,#27420,#27421,#27422,#27423,#27424,#27425,#27426,#27427,#27428,#27429,
#27430,#27431,#27432,#27433,#27434,#27435,#27436,#27437,#27438,#27439,#27440,
#27441,#27442,#27443,#27444,#27445,#27446,#27447,#27448,#27449,#27450,#27451,
#27452,#27453,#27454,#27455,#27456,#27457,#27458,#27459,#27460,#27461,#27462,
#27463,#27464,#27465,#27466,#27467,#27468,#27469,#27470,#27471,#27472,#27473,
#27474,#27475,#27476,#27477,#27478,#27479,#27480,#27481,#27482,#27483,#27484,
#27485,#27486,#27487,#27488,#27489,#27490,#27491,#27492,#27493,#27494,#27495,
#27496,#27497,#27498,#27499,#27500,#27501,#27502,#27503,#27504,#27505,#27506,
#27507,#27508,#27509,#27510,#27511,#27512,#27513,#27514,#27515,#27516,#27517,
#27518,#27519,#27520,#27521,#27522,#27523,#27524,#27525,#27526,#27527,#27528,
#27529,#27530,#27531,#27532,#27533,#27534,#27535,#27536,#27537,#27538,#27539,
#27540,#27541,#27542,#27543,#27544,#27545,#27546,#27547,#27548,#27549,#27550,
#27551,#27552,#27553,#27554,#27555,#27556,#27557,#27558,#27559,#27560,#27561,
#27562,#27563,#27564,#27565,#27566,#27567,#27568,#27569,#27570,#27571,#27572,
#27573,#27574,#27575,#27576,#27577,#27578,#27579,#27580,#27581,#27582,#27583,
#27584,#27585,#27586,#27587,#27588,#27589,#27590,#27591,#27592,#27593,#27594,
#27595,#27596,#27597,#27598,#27599,#27600,#27601,#27602,#27603,#27604,#27605,
#27606,#27607,#27608,#27609,#27610,#27611,#27612,#27613,#27614,#27615,#27616,
#27617,#27618,#27619,#27620,#27621,#27622,#27623,#27624,#27625,#27626,#27627,
#27628,#27629,#27630,#27631,#27632,#27633,#27634,#27635,#27636,#27637,#27638,
#27639,#27640,#27641,#27642,#27643,#27644,#27645,#27646,#27647,#27648,#27649,
#27650,#27651,#27652,#27653,#27654,#27655,#27656,#27657,#27658,#27659,#27660,
#27661,#27662,#27663,#27664,#27665,#27666,#27667,#27668,#27669,#27670,#27671,
#27672,#27673,#27674,#27675,#27676,#27677,#27678,#27679,#27680,#27681,#27682,
#27683,#27684,#27685,#27686,#27687,#27688,#27689,#27690,#27691,#27692,#27693,
#27694,#27695,#27696,#27697,#27698,#27699,#27700,#27701,#27702,#27703,#27704,
#27705,#27706,#27707,#27708,#27709,#27710,#27711,#27712,#27713,#27714,#27715,
#27716,#27717,#27718,#27719,#27720,#27721,#27722,#27723,#27724,#27725,#27726,
#27727,#27728,#27729,#27730,#27731,#27732,#27733,#27734,#27735,#27736,#27737,
#27738,#27739,#27740,#27741,#27742,#27743,#27744,#27745,#27746,#27747,#27748,
#27749,#27750,#27751,#27752,#27753,#27754,#27755,#27756,#27757,#27758,#27759,
#27760,#27761,#27762,#27763,#27764,#27765,#27766,#27767,#27768,#27769,#27770,
#27771,#27772,#27773,#27774,#27775,#27776,#27777,#27778,#27779,#27780,#27781,
#27782,#27783,#27784,#27785,#27786,#27787,#27788,#27789,#27790,#27791,#27792,
#27793,#27794,#27795,#27796,#27797,#27798,#27799,#27800,#27801,#27802,#27803,
#27804,#27805,#27806,#27807,#27808,#27809,#27810,#27811,#27812,#27813,#27814,
#27815,#27816,#27817,#27818,#27819,#27820,#27821,#27822,#27823,#27824,#27825,
#27826,#27827,#27828,#27829,#27830,#27831,#27832,#27833,#27834,#27835,#27836,
#27837,#27838,#27839,#27840,#27841,#27842,#27843,#27844,#27845,#27846,#27847,
#27848,#27849,#27850,#27851,#27852,#27853,#27854,#27855,#27856,#27857,#27858,
#27859,#27860,#27861,#27862,#27863,#27864,#27865,#27866,#27867,#27868,#27869,
#27870,#27871,#27872,#27873,#27874,#27875,#27876,#27877,#27878,#27879,#27880,
#27881,#27882,#27883,#27884,#27885,#27886,#27887,#27888,#27889,#27890,#27891,
#27892,#27893,#27894,#27895,#27896,#27897,#27898,#27899,#27900,#27901,#27902,
#27903,#27904,#27905,#27906,#27907,#27908,#27909,#27910,#27911,#27912,#27913,
#27914,#27915,#27916,#27917,#27918,#27919,#27920,#27921,#27922,#27923,#27924,
#27925,#27926,#27927,#27928,#27929,#27930,#27931,#27932,#27933,#27934,#27935,
#27936,#27937,#27938,#27939,#27940,#27941,#27942,#27943,#27944,#27945,#27946,
#27947,#27948,#27949,#27950,#27951,#27952,#27953,#27954,#27955,#27956,#27957,
#27958,#27959,#27960,#27961,#27962,#27963,#27964,#27965,#27966,#27967,#27968,
#27969,#27970,#27971,#27972,#27973,#27974,#27975,#27976,#27977,#27978,#27979,
#27980,#27981,#27982,#27983,#27984,#27985,#27986,#27987,#27988,#27989,#27990,
#27991,#27992,#27993,#27994,#27995,#27996,#27997,#27998,#27999,#28000,#28001,
#28002,#28003,#28004,#28005,#28006,#28007,#28008,#28009,#28010,#28011,#28012,
#28013,#28014,#28015,#28016,#28017,#28018,#28019,#28020,#28021,#28022,#28023,
#28024,#28025,#28026,#28027,#28028,#28029,#28030,#28031,#28032,#28033,#28034,
#28035,#28036,#28037,#28038,#28039,#28040,#28041,#28042,#28043,#28044,#28045,
#28046,#28047,#28048,#28049,#28050,#28051,#28052,#28053,#28054,#28055,#28056,
#28057,#28058,#28059,#28060,#28061,#28062,#28063,#28064,#28065,#28066,#28067,
#28068,#28069,#28070,#28071,#28072,#28073,#28074,#28075,#28076,#28077,#28078,
#28079,#28080,#28081,#28082,#28083,#28084,#28085,#28086,#28087,#28088,#28089,
#28090,#28091,#28092,#28093,#28094,#28095,#28096,#28097,#28098,#28099,#28100,
#28101,#28102,#28103,#28104,#28105,#28106,#28107,#28108,#28109,#28110,#28111,
#28112,#28113,#28114,#28115,#28116,#28117,#28118,#28119,#28120,#28121,#28122,
#28123,#28124,#28125,#28126,#28127,#28128,#28129,#28130,#28131,#28132,#28133,
#28134,#28135,#28136,#28137,#28138,#28139,#28140,#28141,#28142,#28143,#28144,
#28145,#28146,#28147,#28148,#28149,#28150,#28151,#28152,#28153,#28154,#28155,
#28156,#28157,#28158,#28159,#28160,#28161,#28162,#28163,#28164,#28165,#28166,
#28167,#28168,#28169,#28170,#28171,#28172,#28173,#28174,#28175,#28176,#28177,
#28178,#28179,#28180,#28181,#28182,#28183,#28184,#28185,#28186,#28187,#28188,
#28189,#28190,#28191,#28192,#28193,#28194,#28195,#28196,#28197,#28198,#28199,
#28200,#28201,#28202,#28203,#28204,#28205,#28206,#28207,#28208,#28209,#28210,
#28211,#28212,#28213,#28214,#28215,#28216,#28217,#28218,#28219,#28220,#28221,
#28222,#28223,#28224,#28225,#28226,#28227,#28228,#28229,#28230,#28231,#28232,
#28233,#28234,#28235,#28236,#28237,#28238,#28239,#28240,#28241,#28242,#28243,
#28244,#28245,#28246,#28247,#28248,#28249,#28250,#28251,#28252,#28253,#28254,
#28255,#28256,#28257,#28258,#28259,#28260,#28261,#28262,#28263,#28264,#28265,
#28266,#28267,#28268,#28269,#28270,#28271,#28272,#28273,#28274,#28275,#28276,
#28277,#28278,#28279,#28280,#28281,#28282,#28283,#28284,#28285,#28286,#28287,
#28288,#28289,#28290,#28291,#28292,#28293,#28294,#28295,#28296,#28297,#28298,
#28299,#28300,#28301,#28302,#28303,#28304,#28305,#28306,#28307,#28308,#28309,
#28310,#28311,#28312,#28313,#28314,#28315,#28316,#28317,#28318,#28319,#28320,
#28321,#28322,#28323,#28324,#28325,#28326,#28327,#28328,#28329,#28330,#28331,
#28332,#28333,#28334,#28335,#28336,#28337,#28338,#28339,#28340,#28341,#28342,
#28343,#28344,#28345,#28346,#28347,#28348,#28349,#28350,#28351,#28352,#28353,
#28354,#28355,#28356,#28357),.UNSPECIFIED.,.F.,.F.,(4,3,3,3,3,3,3,3,3,3,
3,3,3,3,3,3,3,3,3,3,3,3,3,3,3,3,3,3,3,3,3,3,3,3,3,3,3,3,3,3,3,3,3,3,3,3,
3,3,3,3,3,3,3,3,3,3,3,3,3,3,3,3,3,3,3,3,3,3,3,3,3,3,3,3,3,3,3,3,3,3,3,3,
3,3,3,3,3,3,3,3,3,3,3,3,3,3,3,3,3,3,3,3,3,3,3,3,3,3,3,3,3,3,3,3,3,3,3,3,
3,3,3,3,3,3,3,3,3,3,3,3,3,3,3,3,3,3,3,3,3,3,3,3,3,3,3,3,3,3,3,3,3,3,3,3,
3,3,3,3,3,3,3,3,3,3,3,3,3,3,3,3,3,3,3,3,3,3,3,3,3,3,3,3,3,3,3,3,3,3,3,3,
3,3,3,3,3,3,3,3,3,3,3,3,3,3,3,3,3,3,3,3,3,3,3,3,3,3,3,3,3,3,3,3,3,3,3,3,
3,3,3,3,3,3,3,3,3,3,3,3,3,3,3,3,3,3,3,3,3,3,3,3,3,3,3,3,3,3,3,3,3,3,3,3,
3,3,3,3,3,3,3,3,3,3,3,3,3,3,3,3,3,3,3,3,3,3,3,3,3,3,3,3,3,3,3,3,3,3,3,3,
3,3,3,3,3,3,3,3,3,3,3,3,3,3,3,3,3,3,3,3,3,3,3,3,3,3,3,3,3,3,3,3,3,3,3,3,
3,3,3,3,3,3,3,3,3,3,3,3,3,3,3,3,3,3,3,3,3,3,3,3,3,3,3,3,4),(4.28246119527943E-9,
0.0034652681281801,0.00687242940177106,0.0103667445335539,0.0138610596653368,
0.0156250042014019,0.0190157839892208,0.0224178348014491,0.0258055922902865,
0.0281325594827445,0.0312500041203425,0.0343548473421466,0.037475093370765,
0.0405832662261407,0.0424040327347683,0.0455177086481123,0.0468750040392832,
0.0499627987483602,0.0530690100248885,0.0561603738895424,0.0566762810636709,
0.0597779137409201,0.0625000039582238,0.0655610201234744,0.0686445528264435,
0.0709490641408505,0.0740327685831872,0.0770974916934342,0.0781250038771645,
0.0811791567947574,0.0842563576791824,0.0852218183299554,0.0882945400129908,
0.0913571706438025,0.0937500037961051,0.0968242768316757,0.0994942051127108,
0.10256472509275,0.105643779774046,0.108694672677839,0.109375003715046,
0.112488684241175,0.113765891574605,0.116877176444821,0.119997923405768,
0.123100687570892,0.125000003633986,0.128036895852055,0.131296939986904,
0.134565943181066,0.137822163606388,0.140625003552927,0.142307492048774,
0.146036642072067,0.149783110285184,0.153509183609748,0.156250003471868,
0.156578085966361,0.160888775573082,0.165244323609507,0.169533415447559,
0.170848849805544,0.171875003390808,0.175330921947005,0.178800149992531,
0.182256910136981,0.185119812918138,0.187500003309749,0.190694523810658,
0.193901855640248,0.197097857176584,0.199391162798289,0.202588166915604,
0.20312500322869,0.206226511129359,0.209344193708185,0.21244797935182,0.213663126361204,
0.216775187127757,0.21875000314763,0.221819930189835,0.224909743868573,
0.227935632926332,0.231155317996451,0.234375003066571,0.237433103676189,
0.240514646151354,0.242208353843615,0.245288171570549,0.248352303987013,
0.250000002985512,0.253054024919063,0.256129782215123,0.256480893949142,
0.259549986295738,0.262614242655679,0.265625002904452,0.268709529756805,
0.270752887009876,0.273833543972924,0.276923666441809,0.279990687152964,
0.281250002823393,0.284408392940147,0.285024190340936,0.288183007578293,
0.291350912428235,0.294504040884251,0.296875002742334,0.29929495085409,
0.30270081128013,0.306116890853609,0.309519945653172,0.312500002661274,
0.31356554505925,0.317787758224659,0.322052811496531,0.326263109980809,
0.327836291415716,0.328125002580215,0.331927274896114,0.33574962411578,
0.3395482206321,0.342107246305058,0.343750002499156,0.347051643698974,0.350365644630868,
0.353668879451234,0.356378446861608,0.359375002418096,0.362514128770795,
0.365667209958344,0.368807746527187,0.370650117996298,0.373795562448653,
0.375000002337037,0.378082786271003,0.381183893107228,0.384270565843463,
0.384922332036222,0.388018769953228,0.390625002255978,0.393689235561965,
0.396775509006929,0.399194891190639,0.402281698048589,0.405348873685269,
0.406250002174918,0.409304742709111,0.412382839175511,0.413467479673848,
0.416541527475266,0.419604551075126,0.421875002093859,0.424948064259093,
0.42773971084943,0.430809172002479,0.433886820291231,0.436935275509955,
0.4375000020128,0.440606518771259,0.442011333140786,0.445115161674851,0.448228538706789,
0.451323290968326,0.45312500193174,0.456282342510317,0.459521047484455,
0.462768684605553,0.466003435576224,0.468750001850681,0.47055301334062,
0.474210443058062,0.477883134406651,0.481537830556625,0.484375001769622,
0.484823738026332,0.489213261589079,0.493655277315462,0.498019442592577,
0.499094685633417,0.500000001688562,0.503497627567315,0.507009126599634,
0.510507212055253,0.513365830089729,0.515625001607503,0.51883055149978,
0.522048676598966,0.5252556388077,0.527637277135351,0.530844267130396,0.531250001526443,
0.534355248747603,0.537476163980311,0.540583446947335,0.541909186539795,
0.545024129930491,0.546875001445384,0.549948104377738,0.55306480196476,
0.556181499551781,0.559340750458053,0.562500001364325,0.56555898572609,
0.568641365987411,0.570454018196863,0.573535084067246,0.5765996749299,0.578125001283265,
0.581178828028378,0.584254757107979,0.584726391116743,0.587796045004343,
0.590859854109304,0.593750001202206,0.596831179206684,0.598998303461887,
0.602075602889837,0.60516227182804,0.608224941259541,0.609375001121147,
0.612521872242794,0.613269615183655,0.616416355861326,0.619572293196611,
0.622713024488105,0.625000001040087,0.627540458695968,0.630910752823095,
0.634290870392211,0.637658265637536,0.640625000959028,0.641811189119748,
0.645923995501822,0.650071962847523,0.654175713491749,0.656082114248289,
0.656250000877969,0.660137074386143,0.664047376747306,0.667929555251047,
0.670353257980218,0.671875000796909,0.675198410694818,0.678534204406642,
0.681859055481715,0.684624574727358,0.68750000071585,0.690645525515084,
0.693804583586252,0.696951443479283,0.698896212868497,0.702047011391243,
0.703125000634791,0.706212271241102,0.709317421580882,0.712408133844682,
0.713168232448721,0.716268471167848,0.718750000553731,0.721815533751672,
0.72490282480177,0.727440574686775,0.730528674058012,0.733596703140776,
0.734375000472672,0.737430458292041,0.740509425515159,0.741712974544986,
0.744788347637247,0.747851705334679,0.750000000391613,0.753071972132896,
0.755985106935391,0.759053678863712,0.762130078583603,0.765176314451987,
0.765625000310553,0.76872536406504,0.77025673058307,0.773354148895053,0.776461172251143,
0.779548852799946,0.781250000229494,0.784527828763194,0.787747033109567,
0.79097518301591,0.794190254704431,0.796875000148435,0.798798646778559,
0.802393367631372,0.806001769812899,0.809593842770817,0.812500000067375,
0.813069549243939,0.817500723648727,0.821989999646579,0.826394083635229,
0.82734068549607,0.828124999986316,0.831665829430779,0.835221181681009,
0.838761951473735,0.841611963124513,0.843749999905257,0.846967292172057,
0.850196886470536,0.853415590340378,0.855883402042594,0.859100878762515,
0.859374999824197,0.862486916003167,0.865614062265672,0.868727696083591,
0.870155124685555,0.873275871396053,0.874999999743138,0.878075445398445,
0.88125133036017,0.884427215321895,0.887526107491987,0.890624999662079,
0.893684418953943,0.896767053153622,0.898699514305987,0.901781261910006,
0.904845741194692,0.906249999581019,0.909304724852279,0.912381985842226,
0.912971780026677,0.916043133144068,0.919107660166391,0.92187499949996,
0.924952903669854,0.927243676545674,0.93031777272575,0.933401066198121,
0.936459712106803,0.9374999994189,0.940632991306583,0.94151505894354,0.944646912269343,
0.947788250587123,0.950912907513048,0.953124999337841,0.955786056796131,
0.959146336339727,0.962515344219781,0.965875093199636,0.968749999256782,
0.970057136694009,0.973831896331178,0.977628944198497,0.981373014192044,
0.984327813703746,0.984374999175722,0.988529611647867,0.992691121632216,
0.996816070659385,0.998600013930966,0.999999998894935),.UNSPECIFIED.);
#4617=B_SPLINE_CURVE_WITH_KNOTS('',3,(#28358,#28359,#28360,#28361,#28362,
#28363,#28364,#28365,#28366,#28367,#28368,#28369,#28370,#28371,#28372,#28373,
#28374,#28375,#28376,#28377,#28378,#28379,#28380,#28381,#28382,#28383,#28384,
#28385,#28386,#28387,#28388,#28389,#28390,#28391,#28392,#28393,#28394,#28395,
#28396,#28397,#28398,#28399,#28400,#28401,#28402,#28403,#28404,#28405,#28406,
#28407,#28408,#28409,#28410,#28411,#28412,#28413,#28414,#28415,#28416,#28417,
#28418,#28419,#28420,#28421,#28422,#28423,#28424,#28425,#28426,#28427,#28428,
#28429,#28430,#28431,#28432,#28433,#28434,#28435,#28436,#28437,#28438,#28439,
#28440,#28441,#28442,#28443,#28444,#28445,#28446,#28447,#28448,#28449,#28450,
#28451,#28452,#28453,#28454,#28455,#28456,#28457,#28458,#28459,#28460,#28461,
#28462,#28463,#28464,#28465,#28466,#28467,#28468,#28469,#28470,#28471,#28472,
#28473,#28474,#28475,#28476,#28477,#28478,#28479,#28480,#28481,#28482,#28483,
#28484,#28485,#28486,#28487,#28488,#28489,#28490,#28491,#28492,#28493,#28494,
#28495,#28496,#28497,#28498,#28499,#28500,#28501,#28502,#28503,#28504,#28505,
#28506,#28507,#28508,#28509,#28510,#28511,#28512,#28513,#28514,#28515,#28516,
#28517,#28518,#28519,#28520,#28521,#28522,#28523,#28524,#28525,#28526,#28527,
#28528,#28529,#28530,#28531,#28532,#28533,#28534,#28535,#28536,#28537,#28538,
#28539,#28540,#28541,#28542,#28543,#28544,#28545,#28546,#28547,#28548,#28549,
#28550,#28551,#28552,#28553,#28554,#28555,#28556,#28557,#28558,#28559,#28560,
#28561,#28562,#28563,#28564,#28565,#28566,#28567,#28568,#28569,#28570,#28571,
#28572,#28573,#28574,#28575,#28576,#28577,#28578,#28579,#28580,#28581,#28582,
#28583,#28584,#28585,#28586,#28587,#28588,#28589,#28590,#28591,#28592,#28593,
#28594,#28595,#28596,#28597,#28598,#28599,#28600,#28601),.UNSPECIFIED.,
 .F.,.F.,(4,3,3,3,3,3,3,3,3,3,3,3,3,3,3,3,3,3,3,3,3,3,3,3,3,3,3,3,3,3,3,
3,3,3,3,3,3,3,3,3,3,3,3,3,3,3,3,3,3,3,3,3,3,3,3,3,3,3,3,3,3,3,3,3,3,3,3,
3,3,3,3,3,3,3,3,3,3,3,3,3,3,4),(5.35516426097628E-12,0.0263730870252173,
0.0519653713362759,0.0771483644018562,0.101693547419077,0.125,0.148947117922754,
0.172329710325005,0.195419031639643,0.218062944098664,0.237476972967033,
0.25,0.272277362590624,0.294256844753887,0.3125,0.333957901346472,0.354872918771361,
0.373030654657964,0.375,0.395992873416101,0.40625,0.41890573511327,0.4375,
0.451359479815329,0.465194858081158,0.46875,0.4765625,0.484375,0.488610434627695,
0.4921875,0.492974319754223,0.495956050363652,0.498820148640148,0.5,0.500004342087961,
0.502863320563874,0.505627542622796,0.5078125,0.511752213671062,0.515625,
0.52289330502561,0.530177914850831,0.53125,0.543705261072398,0.556417198895953,
0.5625,0.562514183175232,0.578699408584059,0.59375,0.609694299682127,0.625,
0.641748591828398,0.658752037360578,0.676168221571225,0.6875,0.705631238385404,
0.719834203389993,0.738123178832965,0.75,0.768848953260192,0.787975275750064,
0.807501667135173,0.8125,0.832319907630098,0.852391403486243,0.872802707986826,
0.875,0.89579431768194,0.917193105114393,0.9375,0.959855727068962,0.96875,
0.984375,0.989970635704306,0.9921875,0.994140625,0.9970703125,0.99853515625,
0.999267578125,0.9996337890625,0.99981689453125,0.999999999999995),
 .UNSPECIFIED.);
#4618=B_SPLINE_CURVE_WITH_KNOTS('',3,(#28910,#28911,#28912,#28913,#28914,
#28915,#28916,#28917,#28918,#28919),.UNSPECIFIED.,.F.,.F.,(4,3,3,4),(0.,
0.636132779257685,0.997584984989511,0.999988398992568),.UNSPECIFIED.);
#4619=B_SPLINE_CURVE_WITH_KNOTS('',3,(#28927,#28928,#28929,#28930,#28931,
#28932,#28933,#28934,#28935,#28936,#28937),.UNSPECIFIED.,.F.,.F.,(4,1,1,
1,1,1,1,1,4),(6.06895117891872E-8,0.125,0.25,0.375,0.5,0.625,0.75,0.875,
1.),.UNSPECIFIED.);
#4620=B_SPLINE_CURVE_WITH_KNOTS('',3,(#28938,#28939,#28940,#28941,#28942,
#28943,#28944,#28945,#28946,#28947,#28948,#28949,#28950,#28951,#28952,#28953,
#28954,#28955,#28956,#28957,#28958,#28959,#28960,#28961,#28962,#28963,#28964,
#28965,#28966,#28967,#28968,#28969,#28970,#28971,#28972,#28973,#28974,#28975,
#28976,#28977,#28978,#28979,#28980,#28981,#28982,#28983,#28984,#28985,#28986,
#28987,#28988,#28989,#28990,#28991,#28992,#28993,#28994,#28995,#28996,#28997,
#28998,#28999,#29000,#29001,#29002,#29003,#29004,#29005,#29006,#29007,#29008,
#29009,#29010,#29011,#29012,#29013,#29014,#29015,#29016,#29017,#29018,#29019,
#29020,#29021,#29022,#29023,#29024,#29025,#29026,#29027,#29028,#29029,#29030,
#29031,#29032,#29033,#29034),.UNSPECIFIED.,.F.,.F.,(4,3,3,3,3,3,3,3,3,3,
3,3,3,3,3,3,3,3,3,3,3,3,3,3,3,3,3,3,3,3,3,3,4),(0.,0.0476492445308846,0.0955532815424208,
0.125,0.142829106341345,0.190322092206355,0.237676079163425,0.25,0.285638443924062,
0.338321429074894,0.360859394751833,0.374393830441,0.381269063592637,0.415928659953108,
0.428473291782651,0.464175632150804,0.490952387426919,0.50070780827971,
0.571282653255263,0.618903761769869,0.625610065740764,0.659121771045337,
0.666524870284476,0.699955501680576,0.733707513078283,0.75,0.787117469886461,
0.823777492135554,0.85690869870577,0.875,0.927239093970382,0.952176360550699,
1.),.UNSPECIFIED.);
#4621=B_SPLINE_CURVE_WITH_KNOTS('',3,(#29137,#29138,#29139,#29140,#29141,
#29142,#29143,#29144,#29145,#29146,#29147,#29148,#29149,#29150,#29151,#29152,
#29153,#29154,#29155,#29156,#29157,#29158,#29159,#29160,#29161,#29162,#29163,
#29164,#29165,#29166,#29167,#29168,#29169,#29170,#29171,#29172,#29173,#29174,
#29175,#29176,#29177,#29178,#29179,#29180,#29181,#29182,#29183,#29184,#29185,
#29186,#29187,#29188,#29189,#29190,#29191,#29192,#29193,#29194,#29195,#29196,
#29197,#29198,#29199,#29200,#29201,#29202,#29203,#29204,#29205,#29206,#29207,
#29208,#29209,#29210,#29211,#29212,#29213,#29214,#29215,#29216,#29217,#29218,
#29219,#29220,#29221,#29222,#29223,#29224,#29225,#29226,#29227,#29228,#29229,
#29230,#29231,#29232,#29233,#29234,#29235,#29236,#29237,#29238,#29239,#29240,
#29241,#29242,#29243,#29244,#29245,#29246,#29247,#29248,#29249,#29250,#29251,
#29252,#29253,#29254,#29255,#29256,#29257,#29258,#29259,#29260,#29261,#29262,
#29263,#29264,#29265,#29266,#29267,#29268,#29269,#29270,#29271,#29272,#29273,
#29274,#29275,#29276,#29277,#29278),.UNSPECIFIED.,.F.,.F.,(4,3,3,3,3,3,
3,3,3,3,3,3,3,3,3,3,3,3,3,3,3,3,3,3,3,3,3,3,3,3,3,3,3,3,3,3,3,3,3,3,3,3,
3,3,3,3,3,4),(0.,0.0290073645090741,0.058605899391275,0.0886029236557415,
0.118357355974039,0.147064676500092,0.178545327965124,0.210520052739441,
0.243227315596292,0.248471898866173,0.263027156807298,0.2933295293203,0.315635682991496,
0.346532317675432,0.368426314562504,0.379553480493591,0.408411675569222,
0.423496256676916,0.434809692507687,0.440113273208952,0.455942686039685,
0.46875,0.477575835673196,0.484375,0.490656168552358,0.496503714624226,
0.5,0.505980743742062,0.511563897503361,0.515625,0.523594840633123,0.53125,
0.545975370931024,0.560582729332676,0.5625,0.568256063117514,0.595240059172669,
0.620537555474378,0.631978201202731,0.669217165290832,0.690252334618346,
0.735680048153583,0.763582268146511,0.815043867902883,0.858685049681881,
0.895166379617797,0.947583189808898,1.),.UNSPECIFIED.);
#4622=B_SPLINE_CURVE_WITH_KNOTS('',3,(#29282,#29283,#29284,#29285,#29286,
#29287,#29288,#29289,#29290,#29291,#29292,#29293,#29294,#29295,#29296,#29297,
#29298,#29299,#29300,#29301,#29302,#29303,#29304,#29305,#29306,#29307,#29308,
#29309,#29310,#29311,#29312,#29313,#29314,#29315,#29316,#29317,#29318,#29319,
#29320,#29321,#29322,#29323,#29324,#29325,#29326,#29327,#29328,#29329,#29330,
#29331,#29332,#29333,#29334,#29335,#29336,#29337,#29338,#29339,#29340,#29341,
#29342,#29343,#29344,#29345,#29346,#29347,#29348,#29349,#29350,#29351,#29352,
#29353,#29354,#29355,#29356,#29357,#29358,#29359,#29360,#29361,#29362,#29363,
#29364,#29365,#29366,#29367,#29368,#29369,#29370,#29371,#29372,#29373,#29374,
#29375,#29376,#29377,#29378,#29379,#29380,#29381,#29382,#29383,#29384,#29385,
#29386,#29387,#29388,#29389,#29390,#29391,#29392,#29393,#29394,#29395,#29396,
#29397,#29398,#29399,#29400,#29401,#29402,#29403,#29404,#29405,#29406,#29407,
#29408,#29409,#29410,#29411,#29412,#29413,#29414,#29415,#29416,#29417,#29418,
#29419,#29420,#29421,#29422,#29423,#29424,#29425,#29426),.UNSPECIFIED.,
 .F.,.F.,(4,3,3,3,3,3,3,3,3,3,3,3,3,3,3,3,3,3,3,3,3,3,3,3,3,3,3,3,3,3,3,
3,3,3,3,3,3,3,3,3,3,3,3,3,3,3,3,3,4),(0.,0.0504742933175192,0.101347271175623,
0.133418231961442,0.185243811098591,0.236613630739913,0.282895669866228,
0.307292546245931,0.325676899935448,0.352193659172207,0.372081228599777,
0.386182807280031,0.412305990299852,0.431743936882486,0.4375,0.452105326310389,
0.466825125840647,0.46875,0.476719840633135,0.484375,0.489939899954562,
0.495815534169186,0.5,0.505780252758934,0.512029300635757,0.515625,0.524450835673198,
0.53125,0.547082617481283,0.559860460209567,0.565190359694114,0.594275245806436,
0.61393185272236,0.627106080280645,0.658211585493941,0.681540714403912,
0.70269044332316,0.727109272228494,0.744712813062646,0.751528101133828,
0.783964377894213,0.815789783050237,0.847042779696298,0.875760205098858,
0.906820153824144,0.936623220991711,0.96608954317497,0.995116759852619,
1.),.UNSPECIFIED.);
#4623=B_SPLINE_CURVE_WITH_KNOTS('',3,(#29432,#29433,#29434,#29435,#29436,
#29437,#29438,#29439,#29440,#29441,#29442,#29443,#29444,#29445,#29446,#29447,
#29448,#29449,#29450,#29451,#29452,#29453,#29454,#29455,#29456,#29457,#29458,
#29459,#29460,#29461,#29462,#29463,#29464,#29465,#29466,#29467,#29468,#29469,
#29470,#29471,#29472,#29473,#29474,#29475,#29476,#29477,#29478,#29479,#29480,
#29481,#29482,#29483,#29484,#29485,#29486,#29487,#29488,#29489,#29490,#29491,
#29492,#29493,#29494,#29495,#29496,#29497,#29498,#29499,#29500,#29501,#29502,
#29503,#29504,#29505,#29506,#29507,#29508,#29509,#29510,#29511,#29512,#29513,
#29514,#29515,#29516,#29517,#29518,#29519,#29520,#29521,#29522,#29523,#29524,
#29525,#29526,#29527,#29528,#29529,#29530,#29531,#29532,#29533,#29534,#29535,
#29536,#29537,#29538,#29539,#29540,#29541,#29542,#29543,#29544,#29545,#29546,
#29547,#29548,#29549,#29550,#29551,#29552,#29553,#29554,#29555,#29556,#29557,
#29558,#29559,#29560,#29561,#29562,#29563,#29564,#29565,#29566,#29567,#29568,
#29569,#29570,#29571,#29572,#29573),.UNSPECIFIED.,.F.,.F.,(4,3,3,3,3,3,
3,3,3,3,3,3,3,3,3,3,3,3,3,3,3,3,3,3,3,3,3,3,3,3,3,3,3,3,3,3,3,3,3,3,3,3,
3,3,3,3,3,4),(0.,0.0504580584263137,0.101317565953683,0.131412793156928,
0.183261325905149,0.234655312364732,0.260360840613928,0.303207135520824,
0.320298005701684,0.355517482395744,0.374574616857186,0.399204808022628,
0.425232943100759,0.431746020241513,0.4375,0.452105920475174,0.466826271248144,
0.46875,0.47672008600552,0.484375,0.489940071811738,0.495815883841961,0.5,
0.505780427679033,0.512029662134438,0.515625,0.524451088920623,0.53125,
0.547070908749231,0.5625,0.591645864421819,0.611631559238773,0.625659379497012,
0.657127390362121,0.680728398510953,0.700203488856136,0.725867455906792,
0.743852454998553,0.751531422957449,0.78396830056542,0.815794495925735,
0.847048462782438,0.875752715001578,0.906814536251183,0.936621846447972,
0.966092970735841,0.995125805222145,1.),.UNSPECIFIED.);
#4624=B_SPLINE_CURVE_WITH_KNOTS('',3,(#29752,#29753,#29754,#29755,#29756,
#29757,#29758,#29759,#29760,#29761),.UNSPECIFIED.,.F.,.F.,(4,2,2,2,4),(-0.559649019319008,
-0.525912938280506,-0.33622056949388,0.,0.00138057665914141),
 .UNSPECIFIED.);
#4625=B_SPLINE_CURVE_WITH_KNOTS('',3,(#29765,#29766,#29767,#29768,#29769,
#29770,#29771,#29772,#29773,#29774),.UNSPECIFIED.,.F.,.F.,(4,2,2,2,4),(-0.00138055939550528,
0.,0.33622019516776,0.525912283290928,0.559648323888169),.UNSPECIFIED.);
#4626=B_SPLINE_CURVE_WITH_KNOTS('',3,(#29785,#29786,#29787,#29788,#29789,
#29790,#29791,#29792,#29793,#29794),.UNSPECIFIED.,.F.,.F.,(4,2,2,2,4),(0.,
0.0477933535295782,0.345379539558703,0.741817028209661,0.743288071109462),
 .UNSPECIFIED.);
#4627=B_SPLINE_CURVE_WITH_KNOTS('',3,(#29798,#29799,#29800,#29801,#29802,
#29803,#29804,#29805,#29806,#29807),.UNSPECIFIED.,.F.,.F.,(4,2,2,2,4),(-0.743287909938841,
-0.74181684467126,-0.345379570680074,-0.0477933776101926,0.),
 .UNSPECIFIED.);
#4628=B_SPLINE_CURVE_WITH_KNOTS('',3,(#29827,#29828,#29829,#29830,#29831,
#29832,#29833,#29834,#29835,#29836),.UNSPECIFIED.,.F.,.F.,(4,2,2,2,4),(-0.650345174559764,
-0.600276631048851,-0.350889327811561,0.,0.00139849998739807),
 .UNSPECIFIED.);
#4629=B_SPLINE_CURVE_WITH_KNOTS('',3,(#29839,#29840,#29841,#29842,#29843,
#29844,#29845,#29846),.UNSPECIFIED.,.F.,.F.,(4,2,2,4),(-0.150648162570471,
-0.150441585188145,-0.0949610521660455,-0.000104753907648664),
 .UNSPECIFIED.);
#4630=B_SPLINE_CURVE_WITH_KNOTS('',3,(#29851,#29852,#29853,#29854,#29855,
#29856,#29857,#29858),.UNSPECIFIED.,.F.,.F.,(4,2,2,4),(2.29740897245143E-5,
0.0949610936421317,0.150441697671403,0.150648270389263),.UNSPECIFIED.);
#4631=B_SPLINE_CURVE_WITH_KNOTS('',3,(#29862,#29863,#29864,#29865,#29866,
#29867,#29868,#29869),.UNSPECIFIED.,.F.,.F.,(4,2,2,4),(-0.00139614869987864,
0.,0.350789793914627,0.878157871485161),.UNSPECIFIED.);
#4632=B_SPLINE_CURVE_WITH_KNOTS('',3,(#29880,#29881,#29882,#29883,#29884,
#29885,#29886,#29887,#29888,#29889,#29890,#29891,#29892,#29893,#29894,#29895,
#29896,#29897,#29898,#29899,#29900,#29901,#29902,#29903,#29904,#29905,#29906,
#29907,#29908,#29909,#29910,#29911,#29912,#29913,#29914,#29915,#29916,#29917,
#29918,#29919,#29920,#29921,#29922,#29923,#29924,#29925,#29926,#29927,#29928,
#29929,#29930,#29931,#29932,#29933,#29934,#29935,#29936,#29937,#29938,#29939,
#29940,#29941,#29942,#29943,#29944,#29945,#29946,#29947,#29948,#29949,#29950,
#29951,#29952,#29953,#29954,#29955,#29956,#29957,#29958,#29959,#29960,#29961,
#29962,#29963,#29964,#29965,#29966,#29967,#29968,#29969,#29970,#29971,#29972,
#29973,#29974,#29975,#29976,#29977,#29978,#29979,#29980,#29981,#29982,#29983,
#29984,#29985,#29986,#29987,#29988,#29989,#29990,#29991,#29992,#29993,#29994,
#29995,#29996,#29997,#29998,#29999,#30000,#30001,#30002,#30003,#30004,#30005,
#30006,#30007,#30008,#30009,#30010,#30011,#30012,#30013,#30014,#30015),
 .UNSPECIFIED.,.F.,.F.,(4,3,3,3,3,3,3,3,3,3,3,3,3,3,3,3,3,3,3,3,3,3,3,3,
3,3,3,3,3,3,3,3,3,3,3,3,3,3,3,3,3,3,3,3,3,4),(0.,0.0290130427656608,0.0586161953116035,
0.0886171965326167,0.118359413110621,0.14705678763029,0.178538277441474,
0.210513683813682,0.243221414211374,0.248468577042543,0.262862232803172,
0.295297591521948,0.31662280051432,0.348363771574743,0.370647828681057,
0.382500567006196,0.411556131132956,0.4375,0.453320908749241,0.46875,0.477576088920612,
0.484375,0.490656351380805,0.496504066116142,0.5,0.505980915422004,0.511564238098985,
0.515625,0.523595086005519,0.53125,0.545975917347068,0.560583867318469,
0.5625,0.568253979758484,0.595238106023579,0.620535724397105,0.631974228758039,
0.669216386388171,0.690253027843987,0.735684047445598,0.763574625011726,
0.815042764632285,0.859200040932575,0.895480423856977,0.947740211928489,
1.),.UNSPECIFIED.);
#4633=B_SPLINE_CURVE_WITH_KNOTS('',3,(#30023,#30024,#30025,#30026,#30027,
#30028,#30029,#30030,#30031,#30032),.UNSPECIFIED.,.F.,.F.,(4,2,2,2,4),(-0.125663823194381,
-0.120139569567565,-0.0549585337346272,-0.00813308457872428,0.),
 .UNSPECIFIED.);
#4634=B_SPLINE_CURVE_WITH_KNOTS('',3,(#30036,#30037,#30038,#30039,#30040,
#30041,#30042,#30043,#30044,#30045),.UNSPECIFIED.,.F.,.F.,(4,2,2,2,4),(-0.115606008219437,
-0.0981872333728485,-0.0502074263840239,0.,0.00487690451944008),
 .UNSPECIFIED.);
#4635=B_SPLINE_CURVE_WITH_KNOTS('',3,(#30058,#30059,#30060,#30061,#30062,
#30063,#30064,#30065,#30066,#30067,#30068,#30069,#30070,#30071,#30072,#30073,
#30074,#30075,#30076,#30077,#30078,#30079,#30080,#30081,#30082,#30083,#30084,
#30085,#30086,#30087,#30088,#30089,#30090,#30091,#30092,#30093,#30094,#30095,
#30096,#30097,#30098,#30099,#30100,#30101,#30102,#30103,#30104,#30105,#30106,
#30107,#30108,#30109,#30110,#30111,#30112,#30113,#30114,#30115),
 .UNSPECIFIED.,.F.,.F.,(4,3,3,3,3,3,3,3,3,3,3,3,3,3,3,3,3,3,3,4),(0.,0.0209768755126978,
0.0430193489958584,0.066551449672816,0.0925179817604086,0.12564657274605,
0.157459480377185,0.183073824760989,0.206890952399892,0.232692756100865,
0.250195730914039,0.259408997481499,0.288888401005764,0.326790467781217,
0.364597654823062,0.394203907114017,0.4218703423988,0.450335250721118,0.482098978020067,
0.5),.UNSPECIFIED.);
#4636=B_SPLINE_CURVE_WITH_KNOTS('',3,(#30117,#30118,#30119,#30120,#30121,
#30122,#30123,#30124),.UNSPECIFIED.,.F.,.F.,(4,1,1,1,1,4),(0.,0.2,0.4,0.6,
0.8,1.),.UNSPECIFIED.);
#4637=B_SPLINE_CURVE_WITH_KNOTS('',3,(#30128,#30129,#30130,#30131,#30132,
#30133,#30134,#30135,#30136,#30137,#30138,#30139,#30140,#30141,#30142,#30143,
#30144,#30145,#30146,#30147,#30148,#30149,#30150,#30151,#30152,#30153,#30154,
#30155,#30156,#30157,#30158,#30159,#30160,#30161,#30162,#30163,#30164,#30165,
#30166,#30167,#30168,#30169,#30170,#30171,#30172,#30173,#30174,#30175,#30176,
#30177,#30178,#30179,#30180,#30181,#30182),.UNSPECIFIED.,.F.,.F.,(4,3,3,
3,3,3,3,3,3,3,3,3,3,3,3,3,3,3,4),(0.,0.0232254816983743,0.0477891065673907,
0.0743132726052906,0.104825369550792,0.124908731425604,0.145853466758666,
0.175327084956769,0.202002440251664,0.230192146211353,0.250139369522363,
0.260437819612014,0.295037907165635,0.346278430374229,0.380748687894821,
0.411492865802003,0.444695254231372,0.482819070255646,0.500000000000012),
 .UNSPECIFIED.);
#4638=B_SPLINE_CURVE_WITH_KNOTS('',3,(#30184,#30185,#30186,#30187,#30188,
#30189,#30190,#30191,#30192,#30193,#30194,#30195,#30196,#30197,#30198,#30199,
#30200,#30201,#30202,#30203,#30204,#30205,#30206,#30207,#30208,#30209,#30210,
#30211,#30212,#30213,#30214,#30215,#30216,#30217,#30218,#30219,#30220,#30221,
#30222,#30223,#30224,#30225,#30226,#30227,#30228,#30229,#30230,#30231,#30232,
#30233,#30234,#30235,#30236,#30237,#30238,#30239,#30240,#30241),
 .UNSPECIFIED.,.F.,.F.,(4,3,3,3,3,3,3,3,3,3,3,3,3,3,3,3,3,3,3,4),(0.500000000000012,
0.553513869012114,0.590378551523534,0.599999902999723,0.624715783809201,
0.661625082159712,0.703015953896881,0.747144754308747,0.783587821076554,
0.799999442486707,0.816618233924173,0.847963111038282,0.871576501586344,
0.903682376189758,0.922338060629563,0.939075518861506,0.96062068740291,
0.977048183662052,0.990504302768856,1.),.UNSPECIFIED.);
#4639=B_SPLINE_CURVE_WITH_KNOTS('',3,(#30256,#30257,#30258,#30259,#30260,
#30261,#30262),.UNSPECIFIED.,.F.,.F.,(4,3,4),(0.,0.5029966780264,1.),
 .UNSPECIFIED.);
#4640=B_SPLINE_CURVE_WITH_KNOTS('',3,(#30266,#30267,#30268,#30269,#30270,
#30271,#30272,#30273,#30274,#30275,#30276,#30277,#30278,#30279,#30280,#30281,
#30282,#30283,#30284,#30285,#30286,#30287,#30288,#30289,#30290,#30291,#30292,
#30293,#30294,#30295,#30296,#30297,#30298,#30299,#30300,#30301,#30302,#30303,
#30304,#30305,#30306,#30307,#30308,#30309,#30310,#30311,#30312,#30313,#30314,
#30315,#30316,#30317,#30318,#30319,#30320,#30321,#30322,#30323,#30324,#30325,
#30326,#30327,#30328,#30329,#30330,#30331,#30332,#30333,#30334,#30335,#30336,
#30337,#30338,#30339,#30340,#30341,#30342,#30343,#30344,#30345,#30346,#30347,
#30348,#30349,#30350,#30351,#30352,#30353,#30354,#30355,#30356,#30357,#30358,
#30359,#30360,#30361,#30362),.UNSPECIFIED.,.F.,.F.,(4,3,3,3,3,3,3,3,3,3,
3,3,3,3,3,3,3,3,3,3,3,3,3,3,3,3,3,3,3,3,3,3,4),(0.,0.0673211154621922,0.134757216009796,
0.194817912007347,0.241497801402382,0.302044861842882,0.355917164443241,
0.375,0.407142271936721,0.431107464285212,0.4375,0.460978254061846,0.485030910550717,
0.5,0.518729963282031,0.538048426601533,0.558657563701937,0.5625,0.579005254261611,
0.595938153351811,0.61320904645473,0.625,0.654648564740949,0.68389123299071,
0.713112800369581,0.74257020719504,0.75,0.799536320159702,0.845692140328104,
0.887812800257649,0.928114145162417,0.965930344556247,0.999999998219709),
 .UNSPECIFIED.);
#4641=B_SPLINE_CURVE_WITH_KNOTS('',3,(#30363,#30364,#30365,#30366,#30367,
#30368,#30369,#30370,#30371,#30372,#30373,#30374,#30375,#30376,#30377,#30378),
 .UNSPECIFIED.,.F.,.F.,(4,3,3,3,3,4),(0.,0.223564597414431,0.442100838610591,
0.65453444911353,0.856353763131463,0.999999999999954),.UNSPECIFIED.);
#4642=B_SPLINE_CURVE_WITH_KNOTS('',3,(#30400,#30401,#30402,#30403,#30404,
#30405,#30406),.UNSPECIFIED.,.F.,.F.,(4,3,4),(0.,0.502998052734124,1.),
 .UNSPECIFIED.);
#4643=B_SPLINE_CURVE_WITH_KNOTS('',3,(#30456,#30457,#30458,#30459,#30460,
#30461,#30462,#30463,#30464,#30465,#30466,#30467,#30468,#30469,#30470,#30471,
#30472,#30473,#30474,#30475,#30476,#30477,#30478,#30479,#30480,#30481,#30482,
#30483,#30484,#30485,#30486,#30487,#30488,#30489,#30490,#30491,#30492,#30493,
#30494,#30495,#30496,#30497,#30498,#30499,#30500,#30501,#30502,#30503,#30504),
 .UNSPECIFIED.,.F.,.F.,(4,3,3,3,3,3,3,3,3,3,3,3,3,3,3,3,4),(0.,0.112336860549818,
0.2,0.28422011485426,0.362053967706262,0.4,0.483044099367124,0.50036412780871,
0.577558938213704,0.6,0.66379587459241,0.74249963206756,0.750071810361121,
0.8,0.856088069783777,0.919696669533124,1.),.UNSPECIFIED.);
#4644=B_SPLINE_CURVE_WITH_KNOTS('',3,(#30505,#30506,#30507,#30508,#30509,
#30510),.UNSPECIFIED.,.F.,.F.,(4,1,1,4),(0.,0.333333333333333,0.666666666666667,
1.),.UNSPECIFIED.);
#4645=B_SPLINE_CURVE_WITH_KNOTS('',3,(#30560,#30561,#30562,#30563,#30564,
#30565,#30566,#30567),.UNSPECIFIED.,.F.,.F.,(4,1,1,1,1,4),(0.,0.2,0.4,0.6,
0.8,1.),.UNSPECIFIED.);
#4646=B_SPLINE_CURVE_WITH_KNOTS('',3,(#30568,#30569,#30570,#30571,#30572,
#30573),.UNSPECIFIED.,.F.,.F.,(4,1,1,4),(0.,0.333333333333333,0.666666666666667,
1.),.UNSPECIFIED.);
#4647=B_SPLINE_CURVE_WITH_KNOTS('',3,(#30585,#30586,#30587,#30588,#30589,
#30590,#30591,#30592,#30593,#30594,#30595,#30596,#30597,#30598,#30599,#30600,
#30601,#30602,#30603,#30604,#30605,#30606,#30607,#30608,#30609,#30610,#30611,
#30612,#30613,#30614,#30615,#30616,#30617,#30618,#30619,#30620,#30621,#30622,
#30623,#30624,#30625,#30626,#30627,#30628,#30629,#30630,#30631,#30632,#30633,
#30634,#30635,#30636,#30637,#30638,#30639,#30640,#30641,#30642),
 .UNSPECIFIED.,.F.,.F.,(4,3,3,3,3,3,3,3,3,3,3,3,3,3,3,3,3,3,3,4),(0.,0.0201516073596035,
0.0412884304277217,0.0637839932683201,0.0883858752793829,0.118394599178245,
0.151777336222632,0.176979395725634,0.200057370883106,0.230152497200472,
0.250235062670459,0.255198981053635,0.282449418850189,0.315033833690904,
0.358247022542373,0.387033662667427,0.412876806118975,0.443231287754012,
0.470280097861578,0.5),.UNSPECIFIED.);
#4648=B_SPLINE_CURVE_WITH_KNOTS('',3,(#30643,#30644,#30645,#30646,#30647,
#30648,#30649,#30650,#30651,#30652,#30653,#30654,#30655,#30656,#30657,#30658,
#30659,#30660,#30661,#30662,#30663,#30664,#30665,#30666,#30667,#30668,#30669,
#30670,#30671,#30672,#30673,#30674,#30675,#30676,#30677,#30678,#30679,#30680,
#30681,#30682,#30683,#30684,#30685,#30686,#30687,#30688,#30689,#30690,#30691,
#30692,#30693,#30694,#30695,#30696,#30697,#30698,#30699,#30700,#30701,#30702,
#30703,#30704,#30705,#30706,#30707,#30708,#30709,#30710,#30711,#30712),
 .UNSPECIFIED.,.F.,.F.,(4,3,3,3,3,3,3,3,3,3,3,3,3,3,3,3,3,3,3,3,3,3,3,4),
(0.5,0.546047274895147,0.577594024503398,0.599999853233931,0.605137766339132,
0.631279064527693,0.659584706675716,0.690047604568452,0.700000304008013,
0.72806361251315,0.762571418490817,0.791881117320141,0.799999387744072,
0.818368789185298,0.844061497720239,0.863301257243668,0.897475942932751,
0.900000058328237,0.915607081014024,0.935331872565244,0.955902901075746,
0.97450932827462,0.989093750790385,1.),.UNSPECIFIED.);
#4649=B_SPLINE_CURVE_WITH_KNOTS('',3,(#30714,#30715,#30716,#30717,#30718,
#30719,#30720,#30721,#30722,#30723,#30724,#30725,#30726,#30727,#30728,#30729,
#30730,#30731,#30732,#30733,#30734,#30735,#30736,#30737,#30738,#30739,#30740,
#30741,#30742,#30743,#30744,#30745,#30746,#30747,#30748,#30749,#30750,#30751,
#30752,#30753,#30754,#30755,#30756,#30757,#30758,#30759,#30760,#30761,#30762,
#30763,#30764,#30765,#30766,#30767,#30768,#30769,#30770,#30771),
 .UNSPECIFIED.,.F.,.F.,(4,3,3,3,3,3,3,3,3,3,3,3,3,3,3,3,3,3,3,4),(0.,0.0220447607244214,
0.0453148930434859,0.0703574074793196,0.0987468145342216,0.1248796813144,
0.141074481757594,0.169495046433079,0.195493612744309,0.224010508913495,
0.250177782555768,0.251983214650552,0.283131358228246,0.325355102646017,
0.361424623654404,0.391397246083346,0.426191980451225,0.457636116510208,
0.494065624848054,0.499999999935016),.UNSPECIFIED.);
#4650=B_SPLINE_CURVE_WITH_KNOTS('',3,(#30773,#30774,#30775,#30776,#30777,
#30778,#30779,#30780,#30781,#30782,#30783,#30784,#30785,#30786,#30787,#30788,
#30789,#30790,#30791,#30792,#30793,#30794,#30795,#30796,#30797,#30798,#30799,
#30800,#30801,#30802,#30803,#30804,#30805,#30806,#30807,#30808,#30809,#30810,
#30811,#30812,#30813,#30814,#30815,#30816,#30817,#30818,#30819,#30820,#30821,
#30822,#30823,#30824,#30825,#30826,#30827,#30828,#30829,#30830,#30831,#30832,
#30833),.UNSPECIFIED.,.F.,.F.,(4,3,3,3,3,3,3,3,3,3,3,3,3,3,3,3,3,3,3,3,
4),(0.499999999999993,0.550329897380635,0.584057241780336,0.59999983500443,
0.615703059437185,0.650069102209683,0.685700262252275,0.700000441914484,
0.734487856766239,0.769274955103562,0.80028783986109,0.830450214033769,
0.853700993921345,0.878780333113577,0.899759372196207,0.917708854008932,
0.933539271676736,0.952451383720256,0.969980264982666,0.984990132491333,
1.),.UNSPECIFIED.);
#4651=B_SPLINE_CURVE_WITH_KNOTS('',3,(#30837,#30838,#30839,#30840,#30841,
#30842,#30843,#30844,#30845,#30846),.UNSPECIFIED.,.F.,.F.,(4,2,2,2,4),(-0.128792590620916,
-0.128247538942988,-0.09827687814719,-0.0675625931234782,0.),
 .UNSPECIFIED.);
#4652=B_SPLINE_CURVE_WITH_KNOTS('',3,(#30850,#30851,#30852,#30853,#30854,
#30855,#30856,#30857,#30858,#30859),.UNSPECIFIED.,.F.,.F.,(4,2,2,2,4),(-0.116376671145237,
-0.057277674707248,-0.0281524135563388,-2.31183683307989E-11,0.000513916977242845),
 .UNSPECIFIED.);
#4653=B_SPLINE_CURVE_WITH_KNOTS('',3,(#30867,#30868,#30869,#30870,#30871,
#30872),.UNSPECIFIED.,.F.,.F.,(4,1,1,4),(-1.60570291183478,-1.14693065131056,
-0.688158390786333,-2.22044604925032E-16),.UNSPECIFIED.);
#4654=B_SPLINE_CURVE_WITH_KNOTS('',3,(#30876,#30877,#30878,#30879,#30880,
#30881,#30882,#30883,#30884,#30885,#30886,#30887,#30888,#30889),
 .UNSPECIFIED.,.F.,.F.,(4,2,2,2,2,2,4),(-0.0446745490144121,-0.0444973001621928,
-0.0349011859168824,-0.0250006610001798,-0.0148293614599646,-0.00903744365727658,
-0.000688947677759585),.UNSPECIFIED.);
#4655=B_SPLINE_CURVE_WITH_KNOTS('',3,(#30891,#30892,#30893,#30894,#30895,
#30896,#30897,#30898,#30899,#30900),.UNSPECIFIED.,.F.,.F.,(4,2,2,2,4),(-0.123792008037082,
-0.0610961173512144,-0.0301345155787575,0.,0.000546169505624025),
 .UNSPECIFIED.);
#4656=B_SPLINE_CURVE_WITH_KNOTS('',3,(#30906,#30907,#30908,#30909,#30910,
#30911,#30912,#30913,#30914,#30915,#30916,#30917,#30918,#30919,#30920,#30921,
#30922,#30923,#30924,#30925,#30926,#30927,#30928,#30929,#30930,#30931,#30932,
#30933,#30934,#30935,#30936,#30937,#30938,#30939,#30940,#30941,#30942,#30943,
#30944,#30945,#30946,#30947,#30948,#30949,#30950,#30951,#30952,#30953,#30954,
#30955,#30956,#30957,#30958,#30959,#30960,#30961,#30962,#30963,#30964,#30965,
#30966,#30967,#30968,#30969,#30970,#30971,#30972,#30973,#30974,#30975,#30976,
#30977,#30978,#30979,#30980,#30981,#30982,#30983,#30984,#30985,#30986,#30987,
#30988,#30989,#30990,#30991,#30992,#30993,#30994,#30995,#30996,#30997,#30998,
#30999,#31000,#31001,#31002,#31003,#31004,#31005,#31006,#31007,#31008,#31009,
#31010,#31011,#31012,#31013,#31014,#31015,#31016,#31017),.UNSPECIFIED.,
 .F.,.F.,(4,3,3,3,3,3,3,3,3,3,3,3,3,3,3,3,3,3,3,3,3,3,3,3,3,3,3,3,3,3,3,
3,3,3,3,3,3,4),(1.2192238837033E-10,0.0450414076663513,0.089267323528465,
0.133358199274977,0.177449075021489,0.219327141488749,0.242983826392778,
0.267345524531766,0.30052489392586,0.332288401052318,0.361990069178642,
0.375,0.400430297724544,0.425331282915455,0.437769952433525,0.462298555667877,
0.487733029089728,0.5,0.53125,0.562343164550161,0.593932226270679,0.625,
0.648437710798349,0.672574850403566,0.696956568077923,0.705931325929027,
0.729547283284428,0.75,0.77510799438099,0.800080995785743,0.823972253513324,
0.847934355633213,0.872343298752635,0.875,0.906994957987268,0.940030260229622,
0.974356573464851,0.999999999951362),.UNSPECIFIED.);
#4657=B_SPLINE_CURVE_WITH_KNOTS('',3,(#31018,#31019,#31020,#31021,#31022,
#31023,#31024,#31025,#31026,#31027,#31028,#31029,#31030,#31031,#31032,#31033,
#31034,#31035,#31036,#31037,#31038,#31039,#31040,#31041,#31042,#31043,#31044,
#31045,#31046,#31047,#31048,#31049,#31050,#31051,#31052,#31053,#31054,#31055,
#31056,#31057,#31058,#31059,#31060,#31061,#31062,#31063,#31064,#31065,#31066,
#31067,#31068,#31069,#31070,#31071,#31072,#31073,#31074,#31075,#31076,#31077,
#31078,#31079,#31080,#31081,#31082,#31083,#31084,#31085,#31086,#31087,#31088,
#31089,#31090,#31091,#31092,#31093,#31094,#31095,#31096,#31097,#31098,#31099,
#31100,#31101,#31102,#31103,#31104,#31105,#31106,#31107,#31108,#31109,#31110,
#31111,#31112,#31113,#31114,#31115,#31116,#31117,#31118,#31119,#31120,#31121,
#31122,#31123,#31124,#31125,#31126,#31127,#31128,#31129,#31130,#31131,#31132,
#31133,#31134,#31135,#31136,#31137,#31138,#31139,#31140,#31141,#31142,#31143,
#31144,#31145,#31146,#31147,#31148,#31149,#31150,#31151,#31152,#31153,#31154,
#31155,#31156,#31157,#31158,#31159,#31160,#31161,#31162,#31163,#31164,#31165,
#31166,#31167,#31168,#31169,#31170,#31171,#31172,#31173,#31174,#31175,#31176,
#31177,#31178,#31179,#31180),.UNSPECIFIED.,.F.,.F.,(4,3,3,3,3,3,3,3,3,3,
3,3,3,3,3,3,3,3,3,3,3,3,3,3,3,3,3,3,3,3,3,3,3,3,3,3,3,3,3,3,3,3,3,3,3,3,
3,3,3,3,3,3,3,3,4),(0.,0.0347899081694819,0.0696372415910073,0.104759039370873,
0.125,0.149765478562314,0.173309591001948,0.1875,0.204151691280955,0.220935439889356,
0.238812640550319,0.25,0.266885915965383,0.284537549712578,0.301993246026595,
0.3125,0.336110034489451,0.357580308078284,0.375,0.395270832891966,0.414822125100852,
0.433175202838111,0.4375,0.442624404621873,0.457086209074222,0.471717413614374,
0.487266354477659,0.5,0.511746021707614,0.523365185254192,0.53125,0.543467375442286,
0.555206110564545,0.5625,0.582104910524563,0.602444262580356,0.623708196935267,
0.636232158843689,0.659551134839808,0.683494861743533,0.6875,0.701432763575235,
0.720486925250639,0.739486623875888,0.75,0.774506338276023,0.798290020287568,
0.821710408485118,0.845065396213416,0.868494895324413,0.875,0.90762089112326,
0.941196712258462,0.975546762325387,1.),.UNSPECIFIED.);
#4658=B_SPLINE_CURVE_WITH_KNOTS('',3,(#31189,#31190,#31191,#31192,#31193),
 .UNSPECIFIED.,.F.,.F.,(4,1,4),(6.0791571649287E-8,0.5,1.),
 .UNSPECIFIED.);
#4659=B_SPLINE_CURVE_WITH_KNOTS('',3,(#31195,#31196,#31197,#31198,#31199,
#31200,#31201,#31202,#31203,#31204,#31205,#31206,#31207,#31208,#31209,#31210,
#31211,#31212,#31213,#31214,#31215,#31216,#31217,#31218,#31219,#31220,#31221,
#31222,#31223,#31224,#31225,#31226,#31227,#31228,#31229,#31230,#31231,#31232,
#31233,#31234,#31235,#31236,#31237,#31238,#31239,#31240,#31241,#31242,#31243,
#31244,#31245,#31246,#31247,#31248,#31249,#31250,#31251,#31252,#31253,#31254,
#31255,#31256,#31257,#31258,#31259,#31260,#31261,#31262,#31263,#31264,#31265,
#31266,#31267,#31268,#31269,#31270,#31271,#31272,#31273,#31274,#31275,#31276,
#31277,#31278,#31279,#31280,#31281,#31282,#31283,#31284,#31285,#31286,#31287,
#31288,#31289,#31290,#31291,#31292,#31293,#31294,#31295,#31296,#31297,#31298,
#31299,#31300,#31301,#31302,#31303,#31304,#31305,#31306),.UNSPECIFIED.,
 .F.,.F.,(4,3,3,3,3,3,3,3,3,3,3,3,3,3,3,3,3,3,3,3,3,3,3,3,3,3,3,3,3,3,3,
3,3,3,3,3,3,4),(1.12589495899714E-10,0.0749910390910546,0.121652147197386,
0.172918215199377,0.225149745512024,0.252539610675905,0.300555648433039,
0.34890938608644,0.369490564261115,0.386692757305106,0.413969699328908,
0.431234098785139,0.438207916887771,0.453478958443886,0.46875,0.479471139097399,
0.490621493906337,0.5,0.512629998210805,0.526249966371014,0.54034796495319,
0.554789402910203,0.5625,0.586014871431338,0.609234634391659,0.621446051619209,
0.632370101023809,0.681100803449178,0.72096320122719,0.745593063438843,
0.775303780005915,0.813272716099255,0.850302911941005,0.875813399239711,
0.911800022781592,0.946250233340704,0.97869932943025,0.999999985673272),
 .UNSPECIFIED.);
#4660=B_SPLINE_CURVE_WITH_KNOTS('',3,(#31309,#31310,#31311,#31312,#31313,
#31314,#31315,#31316,#31317,#31318,#31319,#31320,#31321,#31322,#31323,#31324,
#31325,#31326,#31327,#31328,#31329,#31330,#31331,#31332,#31333,#31334,#31335,
#31336,#31337,#31338,#31339,#31340,#31341,#31342,#31343,#31344,#31345,#31346,
#31347,#31348,#31349,#31350,#31351,#31352,#31353,#31354,#31355,#31356,#31357,
#31358,#31359,#31360,#31361,#31362,#31363,#31364,#31365,#31366,#31367,#31368,
#31369,#31370,#31371,#31372,#31373,#31374,#31375,#31376,#31377,#31378,#31379,
#31380,#31381,#31382,#31383,#31384,#31385,#31386,#31387,#31388,#31389,#31390,
#31391,#31392,#31393,#31394,#31395,#31396,#31397,#31398,#31399,#31400,#31401,
#31402,#31403,#31404,#31405,#31406,#31407,#31408,#31409,#31410,#31411,#31412,
#31413,#31414),.UNSPECIFIED.,.F.,.F.,(4,3,3,3,3,3,3,3,3,3,3,3,3,3,3,3,3,
3,3,3,3,3,3,3,3,3,3,3,3,3,3,3,3,3,3,4),(5.51143720745618E-11,0.0662867950695821,
0.133385598322487,0.201845073110026,0.25,0.292915180861724,0.335395403676467,
0.375,0.40625,0.436427533373899,0.46821376668695,0.5,0.529156625943751,
0.55894040147825,0.575516180259489,0.605555761310229,0.625,0.650315733286139,
0.674849442415774,0.6875,0.703614774412942,0.719936195769019,0.737563983937075,
0.75,0.766555538952597,0.784052688055038,0.801644406088553,0.8125,0.839240844950988,
0.863069639593048,0.875,0.907124321356827,0.938045242259834,0.969022581487477,
0.997258792293999,0.99999992071512),.UNSPECIFIED.);
#4661=B_SPLINE_CURVE_WITH_KNOTS('',3,(#31423,#31424,#31425,#31426,#31427,
#31428,#31429,#31430,#31431,#31432,#31433,#31434,#31435,#31436,#31437,#31438,
#31439,#31440,#31441,#31442,#31443,#31444,#31445,#31446,#31447,#31448,#31449,
#31450,#31451,#31452,#31453,#31454,#31455,#31456,#31457,#31458,#31459,#31460,
#31461,#31462,#31463,#31464,#31465,#31466,#31467,#31468,#31469,#31470,#31471,
#31472,#31473,#31474,#31475,#31476,#31477,#31478,#31479,#31480,#31481,#31482,
#31483,#31484,#31485,#31486,#31487,#31488,#31489,#31490,#31491,#31492,#31493,
#31494,#31495,#31496,#31497,#31498,#31499,#31500,#31501,#31502,#31503,#31504,
#31505,#31506,#31507,#31508,#31509,#31510,#31511,#31512,#31513,#31514,#31515,
#31516,#31517,#31518,#31519,#31520,#31521,#31522,#31523,#31524,#31525,#31526,
#31527,#31528,#31529,#31530,#31531),.UNSPECIFIED.,.F.,.F.,(4,3,3,3,3,3,
3,3,3,3,3,3,3,3,3,3,3,3,3,3,3,3,3,3,3,3,3,3,3,3,3,3,3,3,3,3,4),(0.,0.0278705594391608,
0.0575375378032709,0.0883374921061353,0.120770365897181,0.125,0.14859956319356,
0.174837065813306,0.1875,0.205097381645186,0.222820688105047,0.239179442809779,
0.25,0.267584546864448,0.284134261466024,0.300207353467334,0.3125,0.336903600916911,
0.362051234050344,0.375,0.40563876621303,0.424882636416335,0.455280392050832,
0.485100591983292,0.5,0.531270526023669,0.562100968827547,0.593550484413773,
0.625,0.668096275963989,0.707203362541495,0.743802942223808,0.782961269605731,
0.85156653555772,0.919251644538424,0.985758433920969,1.),.UNSPECIFIED.);
#4662=B_SPLINE_CURVE_WITH_KNOTS('',3,(#31533,#31534,#31535,#31536,#31537,
#31538,#31539),.UNSPECIFIED.,.F.,.F.,(4,3,4),(0.,0.428571428571489,1.),
 .UNSPECIFIED.);
#4663=B_SPLINE_CURVE_WITH_KNOTS('',3,(#31540,#31541,#31542,#31543,#31544),
 .UNSPECIFIED.,.F.,.F.,(4,1,4),(0.,0.571428571428571,1.),.UNSPECIFIED.);
#4664=B_SPLINE_CURVE_WITH_KNOTS('',3,(#31575,#31576,#31577,#31578,#31579),
 .UNSPECIFIED.,.F.,.F.,(4,1,4),(0.,0.5,1.),.UNSPECIFIED.);
#4665=B_SPLINE_CURVE_WITH_KNOTS('',3,(#31677,#31678,#31679,#31680,#31681,
#31682,#31683),.UNSPECIFIED.,.F.,.F.,(4,1,1,1,4),(-1.,-0.714285714285714,
-0.428571428571429,-0.142857142857143,0.),.UNSPECIFIED.);
#4666=B_SPLINE_CURVE_WITH_KNOTS('',3,(#31733,#31734,#31735,#31736,#31737,
#31738,#31739,#31740,#31741,#31742,#31743,#31744,#31745,#31746,#31747,#31748,
#31749,#31750,#31751,#31752,#31753,#31754,#31755,#31756,#31757,#31758,#31759,
#31760,#31761,#31762,#31763,#31764,#31765,#31766,#31767,#31768,#31769,#31770,
#31771,#31772,#31773,#31774,#31775,#31776,#31777,#31778,#31779,#31780,#31781,
#31782,#31783,#31784,#31785,#31786,#31787,#31788,#31789,#31790,#31791,#31792,
#31793,#31794,#31795,#31796,#31797,#31798,#31799,#31800,#31801,#31802,#31803,
#31804,#31805,#31806,#31807,#31808,#31809,#31810,#31811,#31812,#31813,#31814,
#31815,#31816,#31817,#31818,#31819,#31820,#31821,#31822,#31823),
 .UNSPECIFIED.,.F.,.F.,(4,3,3,3,3,3,3,3,3,3,3,3,3,3,3,3,3,3,3,3,3,3,3,3,
3,3,3,3,3,3,4),(0.,0.0487582272514622,0.0990686704385967,0.147837934894236,
0.196215633212963,0.24379795649626,0.25,0.285436192298486,0.33233918785538,
0.379652545563404,0.426229186017527,0.471055187544895,0.5,0.532163297693915,
0.563746262763325,0.573522767465489,0.606191237515735,0.625,0.65625,0.688104189673783,
0.720931523924537,0.75,0.788784600538631,0.82664065039868,0.856650307012014,
0.875,0.89883102820679,0.924404576578673,0.950921750002546,0.978427915216803,
1.),.UNSPECIFIED.);
#4667=B_SPLINE_CURVE_WITH_KNOTS('',3,(#31832,#31833,#31834,#31835,#31836,
#31837),.UNSPECIFIED.,.F.,.F.,(4,1,1,4),(0.577176946999937,0.661978452006387,
1.10329742001067,1.54461638801495),.UNSPECIFIED.);
#4668=B_SPLINE_CURVE_WITH_KNOTS('',3,(#31842,#31843,#31844,#31845,#31846),
 .UNSPECIFIED.,.F.,.F.,(4,1,4),(-1.16950640301334E-13,0.502159078521453,
1.17170451655021),.UNSPECIFIED.);
#4669=B_SPLINE_CURVE_WITH_KNOTS('',3,(#31852,#31853,#31854,#31855,#31856,
#31857,#31858,#31859,#31860,#31861,#31862,#31863,#31864,#31865,#31866,#31867),
 .UNSPECIFIED.,.F.,.F.,(4,3,3,3,3,4),(4.09567009548285E-7,0.199747637480409,
0.411360555301647,0.629114525856601,0.852508632522337,1.),.UNSPECIFIED.);
#4670=B_SPLINE_CURVE_WITH_KNOTS('',3,(#31868,#31869,#31870,#31871,#31872,
#31873,#31874,#31875,#31876,#31877,#31878,#31879,#31880,#31881,#31882,#31883,
#31884,#31885,#31886,#31887,#31888,#31889,#31890,#31891,#31892,#31893,#31894,
#31895,#31896,#31897,#31898,#31899,#31900,#31901,#31902,#31903,#31904,#31905,
#31906,#31907,#31908,#31909,#31910,#31911,#31912,#31913,#31914,#31915,#31916,
#31917,#31918,#31919,#31920,#31921,#31922,#31923,#31924,#31925,#31926,#31927,
#31928,#31929,#31930,#31931,#31932,#31933,#31934,#31935,#31936,#31937,#31938,
#31939,#31940,#31941,#31942,#31943,#31944,#31945,#31946,#31947,#31948,#31949,
#31950,#31951,#31952,#31953,#31954,#31955,#31956,#31957,#31958,#31959,#31960,
#31961,#31962,#31963,#31964,#31965,#31966,#31967,#31968,#31969,#31970,#31971,
#31972,#31973),.UNSPECIFIED.,.F.,.F.,(4,3,3,3,3,3,3,3,3,3,3,3,3,3,3,3,3,
3,3,3,3,3,3,3,3,3,3,3,3,3,3,3,3,3,3,4),(8.81388712068912E-9,0.037400989549759,
0.0757460439269597,0.115118851478111,0.156190093846541,0.198377169931139,
0.24230869056741,0.25,0.300023317805234,0.353875460952451,0.375,0.392753515589225,
0.40625,0.418621097761321,0.430633993396159,0.4375,0.453125,0.467802645065481,
0.482024938845342,0.495914817803661,0.5,0.520892207163738,0.541696103581869,
0.5625,0.566824458342743,0.595673238329735,0.620943660934127,0.634845203329827,
0.690867495607808,0.733878079168396,0.765788516926322,0.819807038449907,
0.873397624335811,0.926794025739626,0.979989642795363,1.),.UNSPECIFIED.);
#4671=B_SPLINE_CURVE_WITH_KNOTS('',3,(#31976,#31977,#31978,#31979,#31980,
#31981,#31982,#31983,#31984,#31985,#31986,#31987,#31988,#31989,#31990,#31991,
#31992,#31993,#31994,#31995,#31996,#31997,#31998,#31999,#32000,#32001,#32002,
#32003,#32004,#32005,#32006,#32007,#32008,#32009,#32010,#32011,#32012,#32013,
#32014,#32015,#32016,#32017,#32018,#32019,#32020,#32021,#32022,#32023,#32024,
#32025,#32026,#32027,#32028,#32029,#32030,#32031,#32032,#32033,#32034,#32035,
#32036,#32037,#32038,#32039,#32040,#32041,#32042,#32043,#32044,#32045,#32046,
#32047,#32048,#32049,#32050,#32051,#32052,#32053,#32054,#32055,#32056,#32057,
#32058,#32059,#32060,#32061,#32062,#32063,#32064,#32065,#32066,#32067,#32068,
#32069,#32070,#32071,#32072,#32073,#32074,#32075,#32076,#32077,#32078,#32079,
#32080,#32081,#32082,#32083,#32084,#32085,#32086,#32087,#32088,#32089,#32090,
#32091,#32092,#32093),.UNSPECIFIED.,.F.,.F.,(4,3,3,3,3,3,3,3,3,3,3,3,3,
3,3,3,3,3,3,3,3,3,3,3,3,3,3,3,3,3,3,3,3,3,3,3,3,3,3,4),(2.57640131202557E-8,
0.0549676360274747,0.110908792017099,0.166845011924826,0.22207965735832,
0.25000001932301,0.285470366993496,0.298747126488448,0.334111484343546,
0.36450670714908,0.375000016102508,0.400521321655227,0.42586041624557,0.430541910731366,
0.455667027011363,0.480154608469572,0.500000012882007,0.526664716454023,
0.552524790522337,0.562500011271756,0.578125010869193,0.593470938195566,
0.609795874813131,0.625000009661505,0.640803003374934,0.657378604906643,
0.67473585317584,0.687500008051254,0.714732374719965,0.740694942854793,
0.750000006441003,0.776811365632964,0.802270532774773,0.827320845806341,
0.852096712988026,0.875000003220502,0.907080023349612,0.939214777710749,
0.971001961268477,1.),.UNSPECIFIED.);
#4672=B_SPLINE_CURVE_WITH_KNOTS('',3,(#32104,#32105,#32106,#32107,#32108,
#32109,#32110,#32111,#32112,#32113,#32114,#32115,#32116,#32117,#32118,#32119,
#32120,#32121,#32122,#32123,#32124,#32125,#32126,#32127,#32128,#32129,#32130,
#32131,#32132,#32133,#32134,#32135,#32136,#32137,#32138,#32139,#32140,#32141,
#32142,#32143,#32144,#32145,#32146,#32147,#32148,#32149,#32150,#32151,#32152,
#32153,#32154,#32155,#32156,#32157,#32158,#32159,#32160,#32161,#32162,#32163,
#32164,#32165,#32166,#32167,#32168,#32169,#32170,#32171,#32172,#32173,#32174,
#32175,#32176,#32177,#32178,#32179,#32180,#32181,#32182,#32183,#32184,#32185,
#32186,#32187,#32188,#32189,#32190,#32191,#32192,#32193,#32194,#32195,#32196,
#32197,#32198,#32199,#32200,#32201,#32202,#32203,#32204,#32205,#32206,#32207,
#32208,#32209,#32210,#32211,#32212,#32213,#32214,#32215,#32216,#32217,#32218,
#32219,#32220,#32221,#32222,#32223,#32224,#32225,#32226,#32227,#32228,#32229,
#32230,#32231,#32232,#32233,#32234,#32235,#32236,#32237,#32238,#32239,#32240,
#32241,#32242,#32243,#32244,#32245),.UNSPECIFIED.,.F.,.F.,(4,3,3,3,3,3,
3,3,3,3,3,3,3,3,3,3,3,3,3,3,3,3,3,3,3,3,3,3,3,3,3,3,3,3,3,3,3,3,3,3,3,3,
3,3,3,3,3,4),(2.31458789097349E-8,0.0276917160594385,0.0563747404566362,
0.0861910049047136,0.110005114402602,0.124600217792774,0.136384977106062,
0.171849154475334,0.1875,0.211902740928815,0.21875,0.231024777910653,0.24244855920807,
0.25,0.261530491505412,0.272252035031408,0.28125,0.282577634614039,0.297717559699483,
0.3125,0.339033468357412,0.364848462479444,0.375,0.424687998048689,0.4375,
0.456418959194465,0.475038286654068,0.493046295163825,0.5,0.518306760823821,
0.5361493315079,0.553570652245575,0.5625,0.568854692501604,0.594303131445472,
0.619765282139977,0.625,0.658698335296718,0.692321078452627,0.725658732294199,
0.75,0.78791760877854,0.825267675467351,0.862129834579987,0.898396006872651,
0.934398624792789,0.970092203537377,1.),.UNSPECIFIED.);
#4673=B_SPLINE_CURVE_WITH_KNOTS('',3,(#32251,#32252,#32253,#32254,#32255),
 .UNSPECIFIED.,.F.,.F.,(4,1,4),(-1.17170451655022,-0.669545438028639,1.2920849993024E-13),
 .UNSPECIFIED.);
#4674=B_SPLINE_CURVE_WITH_KNOTS('',3,(#32260,#32261,#32262,#32263,#32264,
#32265),.UNSPECIFIED.,.F.,.F.,(4,1,1,4),(-3.46389583683049E-14,0.441318968004245,
0.882637936008528,0.967460953981603),.UNSPECIFIED.);
#4675=B_SPLINE_CURVE_WITH_KNOTS('',3,(#32268,#32269,#32270,#32271,#32272,
#32273,#32274,#32275,#32276,#32277,#32278,#32279,#32280,#32281,#32282,#32283,
#32284,#32285,#32286,#32287,#32288,#32289,#32290,#32291,#32292,#32293,#32294,
#32295,#32296,#32297,#32298,#32299,#32300,#32301),.UNSPECIFIED.,.F.,.F.,
(4,3,3,3,3,3,3,3,3,3,3,4),(0.,0.101344603738438,0.209039430806438,0.316734257874438,
0.419541318236788,0.5,0.590686764646725,0.681691065134809,0.772166067130496,
0.861569632435631,0.948395505652533,0.999999999835421),.UNSPECIFIED.);
#4676=B_SPLINE_CURVE_WITH_KNOTS('',3,(#32306,#32307,#32308,#32309,#32310),
 .UNSPECIFIED.,.F.,.F.,(4,1,4),(-1.95399252334028E-14,0.618304703530678,
1.44271097490494),.UNSPECIFIED.);
#4677=B_SPLINE_CURVE_WITH_KNOTS('',3,(#32323,#32324,#32325,#32326,#32327),
 .UNSPECIFIED.,.F.,.F.,(4,1,4),(0.,0.5,1.),.UNSPECIFIED.);
#4678=B_SPLINE_CURVE_WITH_KNOTS('',3,(#32330,#32331,#32332,#32333,#32334),
 .UNSPECIFIED.,.F.,.F.,(4,1,4),(0.,0.5,1.),.UNSPECIFIED.);
#4679=B_SPLINE_CURVE_WITH_KNOTS('',3,(#32345,#32346,#32347,#32348,#32349,
#32350,#32351,#32352,#32353,#32354,#32355,#32356,#32357,#32358,#32359,#32360,
#32361,#32362,#32363,#32364,#32365,#32366,#32367,#32368,#32369,#32370,#32371,
#32372,#32373,#32374,#32375,#32376,#32377,#32378,#32379,#32380,#32381,#32382,
#32383,#32384,#32385,#32386,#32387,#32388,#32389,#32390,#32391,#32392,#32393,
#32394,#32395,#32396,#32397,#32398,#32399),.UNSPECIFIED.,.F.,.F.,(4,3,3,
3,3,3,3,3,3,3,3,3,3,3,3,3,3,3,4),(0.,0.0651498494323316,0.128293034126196,
0.189146517063098,0.25,0.297532006520758,0.344597956989377,0.390876338274615,
0.433927964368902,0.480841022717697,0.5,0.562499999996444,0.626982848648141,
0.693553064174403,0.761622101977086,0.830039070626112,0.897578362577629,
0.962749717167483,0.999999999971555),.UNSPECIFIED.);
#4680=B_SPLINE_CURVE_WITH_KNOTS('',3,(#32403,#32404,#32405,#32406,#32407,
#32408,#32409,#32410,#32411,#32412,#32413,#32414,#32415,#32416,#32417,#32418,
#32419,#32420,#32421,#32422,#32423,#32424,#32425,#32426,#32427,#32428,#32429,
#32430,#32431,#32432,#32433,#32434,#32435,#32436),.UNSPECIFIED.,.F.,.F.,
(4,3,3,3,3,3,3,3,3,3,3,4),(0.,0.0773445814567047,0.160777020184018,0.252446923102137,
0.34678753920248,0.438921521251531,0.5,0.609252642638129,0.709893831460602,
0.807865628397594,0.90535674157566,1.),.UNSPECIFIED.);
#4681=B_SPLINE_CURVE_WITH_KNOTS('',3,(#32437,#32438,#32439,#32440,#32441,
#32442,#32443,#32444,#32445,#32446,#32447,#32448,#32449,#32450,#32451,#32452,
#32453,#32454,#32455,#32456,#32457,#32458,#32459,#32460,#32461,#32462,#32463,
#32464,#32465,#32466,#32467,#32468,#32469,#32470),.UNSPECIFIED.,.F.,.F.,
(4,3,3,3,3,3,3,3,3,3,3,4),(0.,0.0992340482887069,0.199737450101066,0.302248813931053,
0.406012688909618,0.511675331462171,0.538462524101814,0.643686878243392,
0.751358001140388,0.860570838142931,0.972144318975827,1.),.UNSPECIFIED.);
#4682=B_SPLINE_CURVE_WITH_KNOTS('',3,(#32477,#32478,#32479,#32480,#32481,
#32482,#32483,#32484,#32485,#32486,#32487,#32488,#32489,#32490,#32491,#32492,
#32493,#32494,#32495,#32496,#32497,#32498,#32499,#32500,#32501,#32502,#32503,
#32504,#32505,#32506,#32507,#32508,#32509,#32510,#32511,#32512,#32513),
 .UNSPECIFIED.,.F.,.F.,(4,3,3,3,3,3,3,3,3,3,3,3,4),(0.,0.103713796752594,
0.209425960742887,0.275311286489813,0.381627312725155,0.491933870285472,
0.5,0.579884958512016,0.663162576779255,0.752121423199099,0.843051446359658,
0.932542995353432,0.999999990951841),.UNSPECIFIED.);
#4683=B_SPLINE_CURVE_WITH_KNOTS('',3,(#32539,#32540,#32541,#32542,#32543),
 .UNSPECIFIED.,.F.,.F.,(4,1,4),(0.,0.5,1.),.UNSPECIFIED.);
#4684=B_SPLINE_CURVE_WITH_KNOTS('',3,(#32564,#32565,#32566,#32567,#32568,
#32569,#32570,#32571,#32572,#32573,#32574,#32575,#32576,#32577,#32578,#32579),
 .UNSPECIFIED.,.F.,.F.,(4,3,3,3,3,4),(0.,0.315687474104737,0.428567522556089,
0.59383445920703,0.911781694108068,1.),.UNSPECIFIED.);
#4685=B_SPLINE_CURVE_WITH_KNOTS('',3,(#32605,#32606,#32607,#32608,#32609),
 .UNSPECIFIED.,.F.,.F.,(4,1,4),(0.,0.5,1.),.UNSPECIFIED.);
#4686=B_SPLINE_CURVE_WITH_KNOTS('',3,(#32611,#32612,#32613,#32614,#32615,
#32616,#32617,#32618,#32619,#32620,#32621,#32622,#32623,#32624,#32625,#32626,
#32627,#32628,#32629,#32630,#32631,#32632,#32633,#32634,#32635,#32636,#32637,
#32638,#32639,#32640,#32641,#32642,#32643,#32644,#32645,#32646,#32647,#32648,
#32649,#32650,#32651,#32652,#32653,#32654,#32655,#32656,#32657,#32658,#32659,
#32660,#32661,#32662,#32663,#32664,#32665,#32666,#32667,#32668,#32669,#32670,
#32671,#32672,#32673,#32674,#32675,#32676,#32677,#32678,#32679,#32680,#32681,
#32682,#32683,#32684,#32685,#32686,#32687,#32688,#32689,#32690,#32691,#32692,
#32693,#32694,#32695,#32696,#32697,#32698,#32699,#32700,#32701,#32702,#32703,
#32704,#32705,#32706,#32707,#32708,#32709,#32710,#32711,#32712,#32713,#32714,
#32715,#32716,#32717,#32718,#32719),.UNSPECIFIED.,.F.,.F.,(4,3,3,3,3,3,
3,3,3,3,3,3,3,3,3,3,3,3,3,3,3,3,3,3,3,3,3,3,3,3,3,3,3,3,3,3,4),(0.,0.0288452684502641,
0.0593159758107186,0.0921579879053593,0.125,0.148268190454504,0.173561697525864,
0.1875,0.204667468755923,0.221931433950138,0.238141261588062,0.25,0.267249706120148,
0.283694457985781,0.299774279639639,0.3125,0.33722025364079,0.362793078743651,
0.375,0.404506132741407,0.425108518079629,0.45448587503128,0.483407559410163,
0.5,0.53125,0.561437883312498,0.59146287882996,0.621437245329675,0.625,
0.666954403923037,0.707306024847823,0.743892771741845,0.778583503022393,
0.845833923165649,0.912098011495246,0.977019960925374,1.),.UNSPECIFIED.);
#4687=B_SPLINE_CURVE_WITH_KNOTS('',3,(#32722,#32723,#32724,#32725,#32726,
#32727,#32728,#32729,#32730,#32731,#32732,#32733,#32734,#32735,#32736,#32737,
#32738,#32739,#32740,#32741,#32742,#32743,#32744,#32745,#32746,#32747,#32748,
#32749,#32750,#32751,#32752,#32753,#32754,#32755,#32756,#32757,#32758,#32759,
#32760,#32761,#32762,#32763,#32764,#32765,#32766,#32767,#32768,#32769,#32770,
#32771,#32772,#32773,#32774,#32775,#32776,#32777,#32778,#32779,#32780,#32781,
#32782,#32783,#32784,#32785,#32786,#32787,#32788,#32789,#32790,#32791,#32792,
#32793,#32794,#32795,#32796,#32797,#32798,#32799,#32800,#32801,#32802,#32803,
#32804,#32805,#32806,#32807,#32808,#32809,#32810,#32811,#32812,#32813,#32814,
#32815,#32816,#32817,#32818,#32819,#32820,#32821,#32822,#32823,#32824),
 .UNSPECIFIED.,.F.,.F.,(4,3,3,3,3,3,3,3,3,3,3,3,3,3,3,3,3,3,3,3,3,3,3,3,
3,3,3,3,3,3,3,3,3,3,4),(0.,0.068814096877486,0.13940040831863,0.211198289888652,
0.251723023293181,0.29224775669771,0.339584770266124,0.375,0.406601873243569,
0.438298069085176,0.470372737313957,0.5,0.529355323540815,0.559099272383531,
0.575594851240901,0.605420726218371,0.625,0.65625,0.685184220267245,0.6875,
0.704389154696483,0.721489478744464,0.739703726930211,0.75,0.766771471075767,
0.784231656192686,0.801686473851756,0.8125,0.838726443274617,0.862697210381301,
0.875,0.907623035902223,0.9391720016665,0.96958600083325,1.),
 .UNSPECIFIED.);
#4688=B_SPLINE_CURVE_WITH_KNOTS('',3,(#32825,#32826,#32827,#32828,#32829),
 .UNSPECIFIED.,.F.,.F.,(4,1,4),(0.,0.5,1.),.UNSPECIFIED.);
#4689=B_SPLINE_CURVE_WITH_KNOTS('',3,(#32891,#32892,#32893,#32894,#32895,
#32896,#32897,#32898,#32899,#32900,#32901,#32902,#32903,#32904,#32905,#32906),
 .UNSPECIFIED.,.F.,.F.,(4,3,3,3,3,4),(0.,0.381929737850853,0.5,0.57143215013093,
0.950510775354391,1.),.UNSPECIFIED.);
#4690=B_SPLINE_CURVE_WITH_KNOTS('',3,(#32952,#32953,#32954,#32955,#32956),
 .UNSPECIFIED.,.F.,.F.,(4,1,4),(0.,0.5,1.),.UNSPECIFIED.);
#4691=B_SPLINE_CURVE_WITH_KNOTS('',3,(#32978,#32979,#32980,#32981,#32982,
#32983,#32984,#32985,#32986,#32987,#32988,#32989,#32990,#32991,#32992,#32993,
#32994,#32995,#32996,#32997,#32998,#32999,#33000,#33001,#33002,#33003,#33004,
#33005,#33006,#33007,#33008,#33009,#33010,#33011),.UNSPECIFIED.,.F.,.F.,
(4,3,3,3,3,3,3,3,3,3,3,4),(0.,0.0980224277413709,0.198516820806028,0.298254163211884,
0.40480932086415,0.5,0.59143584832032,0.685930201681688,0.777063513907197,
0.863531872078304,0.941349892640893,1.),.UNSPECIFIED.);
#4692=B_SPLINE_CURVE_WITH_KNOTS('',3,(#33012,#33013,#33014,#33015,#33016),
 .UNSPECIFIED.,.F.,.F.,(4,1,4),(0.,0.5,1.),.UNSPECIFIED.);
#4693=B_SPLINE_CURVE_WITH_KNOTS('',3,(#33043,#33044,#33045,#33046,#33047,
#33048,#33049,#33050,#33051,#33052,#33053,#33054,#33055,#33056,#33057,#33058,
#33059,#33060,#33061,#33062,#33063,#33064,#33065,#33066,#33067,#33068,#33069,
#33070,#33071,#33072,#33073),.UNSPECIFIED.,.F.,.F.,(4,3,3,3,3,3,3,3,3,3,
4),(0.,0.112857209509747,0.223657939324157,0.331659777866717,0.438194134970112,
0.542647585929984,0.603178693499946,0.705358789619879,0.806326258950376,
0.905423707904238,1.),.UNSPECIFIED.);
#4694=B_SPLINE_CURVE_WITH_KNOTS('',3,(#33074,#33075,#33076,#33077,#33078),
 .UNSPECIFIED.,.F.,.F.,(4,1,4),(0.,0.5,1.),.UNSPECIFIED.);
#4695=B_SPLINE_CURVE_WITH_KNOTS('',3,(#33081,#33082,#33083,#33084,#33085,
#33086,#33087,#33088,#33089,#33090,#33091,#33092,#33093,#33094,#33095,#33096,
#33097,#33098,#33099,#33100,#33101,#33102,#33103,#33104,#33105,#33106,#33107,
#33108,#33109,#33110,#33111,#33112,#33113,#33114,#33115,#33116,#33117,#33118,
#33119,#33120,#33121,#33122,#33123,#33124,#33125,#33126,#33127,#33128,#33129,
#33130,#33131,#33132,#33133,#33134,#33135,#33136,#33137,#33138,#33139,#33140,
#33141,#33142,#33143,#33144,#33145,#33146,#33147,#33148,#33149,#33150,#33151,
#33152,#33153,#33154,#33155,#33156,#33157,#33158,#33159,#33160,#33161,#33162,
#33163,#33164,#33165,#33166,#33167,#33168,#33169,#33170,#33171,#33172,#33173,
#33174,#33175,#33176,#33177,#33178,#33179,#33180,#33181,#33182,#33183,#33184,
#33185,#33186,#33187,#33188,#33189,#33190,#33191,#33192),.UNSPECIFIED.,
 .F.,.F.,(4,3,3,3,3,3,3,3,3,3,3,3,3,3,3,3,3,3,3,3,3,3,3,3,3,3,3,3,3,3,3,
3,3,3,3,3,3,4),(0.,0.0647536145503648,0.131108501956244,0.19841348162769,
0.245552822466565,0.270750026197808,0.292692163305441,0.334627589551336,
0.375,0.40625,0.436309066852105,0.466543230073346,0.497224978067758,0.5,
0.528815279893169,0.558133635297759,0.574906232599203,0.604388492438145,
0.625,0.650638224031993,0.675433896455577,0.6875,0.703577977292224,0.719806238252665,
0.737087061946652,0.75,0.766302336760612,0.783359865385818,0.80050100171698,
0.8125,0.838241384718217,0.861640495637482,0.875,0.907251790695266,0.9384413723138,
0.9692206861569,0.998034216296308,1.),.UNSPECIFIED.);
#4696=B_SPLINE_CURVE_WITH_KNOTS('',3,(#33197,#33198,#33199,#33200,#33201),
 .UNSPECIFIED.,.F.,.F.,(4,1,4),(0.,0.5,1.),.UNSPECIFIED.);
#4697=B_SPLINE_CURVE_WITH_KNOTS('',3,(#33202,#33203,#33204,#33205,#33206,
#33207,#33208,#33209,#33210,#33211,#33212,#33213,#33214,#33215,#33216,#33217,
#33218,#33219,#33220,#33221,#33222,#33223,#33224,#33225,#33226,#33227,#33228,
#33229,#33230,#33231,#33232,#33233,#33234,#33235,#33236,#33237,#33238,#33239,
#33240,#33241,#33242,#33243,#33244,#33245,#33246,#33247,#33248,#33249,#33250,
#33251,#33252,#33253,#33254,#33255,#33256,#33257,#33258,#33259,#33260,#33261,
#33262,#33263,#33264,#33265,#33266,#33267,#33268,#33269,#33270,#33271,#33272,
#33273,#33274,#33275,#33276,#33277,#33278,#33279,#33280,#33281,#33282,#33283,
#33284,#33285,#33286,#33287,#33288,#33289,#33290,#33291,#33292,#33293,#33294,
#33295,#33296,#33297,#33298,#33299,#33300,#33301,#33302,#33303,#33304,#33305,
#33306,#33307),.UNSPECIFIED.,.F.,.F.,(4,3,3,3,3,3,3,3,3,3,3,3,3,3,3,3,3,
3,3,3,3,3,3,3,3,3,3,3,3,3,3,3,3,3,3,4),(0.,0.0288448218732615,0.0593149518138787,
0.0921574759069394,0.125,0.148271824889929,0.173569243391132,0.1875,0.204669167596012,
0.221935231030869,0.238147990897773,0.25,0.26725067336018,0.283696719471372,
0.299778278593032,0.3125,0.337149342461497,0.362643243127422,0.375,0.404793274587124,
0.425085593431507,0.454750535530613,0.483978456850126,0.5,0.53125,0.56198781748541,
0.593493908742705,0.625,0.66868235411067,0.707761403892674,0.744291228406089,
0.785710753512869,0.85448637651023,0.922168387559006,0.988480375643785,
1.),.UNSPECIFIED.);
#4698=B_SPLINE_CURVE_WITH_KNOTS('',3,(#33368,#33369,#33370,#33371,#33372,
#33373,#33374,#33375,#33376,#33377,#33378,#33379,#33380,#33381,#33382,#33383),
 .UNSPECIFIED.,.F.,.F.,(4,3,3,3,3,4),(0.,0.378757750763901,0.42856787963011,
0.5,0.880980518420859,1.),.UNSPECIFIED.);
#4699=B_SPLINE_CURVE_WITH_KNOTS('',3,(#33406,#33407,#33408,#33409,#33410),
 .UNSPECIFIED.,.F.,.F.,(4,1,4),(0.,0.5,1.),.UNSPECIFIED.);
#4700=B_SPLINE_CURVE_WITH_KNOTS('',3,(#33413,#33414,#33415,#33416,#33417,
#33418,#33419,#33420,#33421,#33422,#33423,#33424,#33425,#33426,#33427,#33428,
#33429,#33430,#33431,#33432,#33433,#33434,#33435,#33436,#33437,#33438,#33439,
#33440,#33441,#33442,#33443,#33444,#33445,#33446,#33447,#33448,#33449,#33450,
#33451,#33452,#33453,#33454,#33455,#33456,#33457,#33458,#33459,#33460,#33461,
#33462,#33463,#33464,#33465,#33466,#33467,#33468,#33469,#33470,#33471,#33472,
#33473,#33474,#33475,#33476,#33477,#33478,#33479,#33480,#33481,#33482,#33483,
#33484,#33485,#33486,#33487,#33488,#33489,#33490,#33491,#33492,#33493,#33494,
#33495,#33496,#33497,#33498,#33499,#33500,#33501,#33502,#33503,#33504,#33505,
#33506,#33507,#33508,#33509,#33510,#33511,#33512,#33513,#33514,#33515,#33516,
#33517,#33518,#33519,#33520,#33521,#33522,#33523,#33524,#33525,#33526,#33527,
#33528,#33529,#33530,#33531,#33532,#33533,#33534,#33535,#33536,#33537,#33538,
#33539,#33540,#33541,#33542,#33543,#33544,#33545,#33546,#33547,#33548),
 .UNSPECIFIED.,.F.,.F.,(4,3,3,3,3,3,3,3,3,3,3,3,3,3,3,3,3,3,3,3,3,3,3,3,
3,3,3,3,3,3,3,3,3,3,3,3,3,3,3,3,3,3,3,3,3,4),(0.,0.0289651478886806,0.0582889522722898,
0.087996467862389,0.114334282712552,0.140360273205394,0.17097298289286,
0.202511492903275,0.231699509978037,0.247772471292148,0.261270630231453,
0.294795632974176,0.315956207253557,0.348579537876831,0.369059811169543,
0.380096530958655,0.405823956229424,0.437286978114712,0.450187339755307,
0.465976245195481,0.46875,0.477565786674945,0.484375,0.490649797719405,
0.496500215788219,0.5,0.505972410096875,0.511561344255098,0.515625,0.523609985694564,
0.53125,0.546021388069481,0.560744167644267,0.5625,0.588509975213804,0.614758475733369,
0.625,0.662061928523274,0.685655096395862,0.707954666621112,0.753445039747901,
0.805076098980274,0.853807074235206,0.917181408264434,0.968943264378771,
1.),.UNSPECIFIED.);
#4701=B_SPLINE_CURVE_WITH_KNOTS('',3,(#33550,#33551,#33552,#33553,#33554,
#33555,#33556,#33557,#33558,#33559,#33560,#33561,#33562,#33563,#33564,#33565,
#33566,#33567,#33568,#33569,#33570,#33571,#33572,#33573,#33574,#33575,#33576,
#33577,#33578,#33579,#33580,#33581,#33582,#33583,#33584,#33585,#33586,#33587,
#33588,#33589,#33590,#33591,#33592,#33593,#33594,#33595,#33596,#33597,#33598,
#33599,#33600,#33601,#33602,#33603,#33604,#33605,#33606,#33607,#33608,#33609,
#33610,#33611,#33612,#33613,#33614,#33615,#33616,#33617,#33618,#33619,#33620,
#33621,#33622,#33623,#33624,#33625,#33626,#33627,#33628,#33629,#33630,#33631,
#33632,#33633,#33634,#33635,#33636,#33637,#33638,#33639,#33640,#33641,#33642,
#33643,#33644,#33645,#33646,#33647,#33648,#33649,#33650,#33651,#33652,#33653,
#33654,#33655,#33656,#33657,#33658,#33659,#33660,#33661,#33662,#33663,#33664,
#33665,#33666,#33667,#33668,#33669,#33670,#33671,#33672,#33673,#33674,#33675,
#33676,#33677,#33678,#33679,#33680,#33681,#33682,#33683,#33684,#33685,#33686,
#33687,#33688,#33689,#33690,#33691),.UNSPECIFIED.,.F.,.F.,(4,3,3,3,3,3,
3,3,3,3,3,3,3,3,3,3,3,3,3,3,3,3,3,3,3,3,3,3,3,3,3,3,3,3,3,3,3,3,3,3,3,3,
3,3,3,3,3,4),(0.,0.0504724923579365,0.101343567025573,0.133421373302487,
0.185246821595358,0.236616795477296,0.282898019592504,0.307292648661474,
0.325676696244249,0.352193515035933,0.372081129129695,0.386182185346678,
0.412303832436111,0.431743971410982,0.4375,0.452104629039414,0.466823811529752,
0.46875,0.47671943682985,0.484375,0.489939619274545,0.495814961508002,0.5,
0.505779966175613,0.51202870879814,0.515625,0.524450481522834,0.53125,0.547069893197461,
0.5625,0.591640906329748,0.611626660432498,0.625656168530963,0.65712386118616,
0.680724630677558,0.700194901955359,0.725860920553554,0.743840176833182,
0.75152693915175,0.783961761510188,0.81578565297598,0.847037081719769,0.875762268431885,
0.906821701209501,0.936620971990008,0.96608314050306,0.995105659459647,
0.999999999542346),.UNSPECIFIED.);
#4702=B_SPLINE_CURVE_WITH_KNOTS('',3,(#33701,#33702,#33703,#33704,#33705),
 .UNSPECIFIED.,.F.,.F.,(4,1,4),(0.,0.5,1.),.UNSPECIFIED.);
#4703=B_SPLINE_CURVE_WITH_KNOTS('',3,(#33707,#33708,#33709,#33710,#33711),
 .UNSPECIFIED.,.F.,.F.,(4,1,4),(0.,0.5,1.),.UNSPECIFIED.);
#4704=B_SPLINE_CURVE_WITH_KNOTS('',3,(#33726,#33727,#33728,#33729),
 .UNSPECIFIED.,.F.,.F.,(4,4),(-0.0278756418538048,2.86417159298651E-16),
 .UNSPECIFIED.);
#4705=B_SPLINE_CURVE_WITH_KNOTS('',3,(#33730,#33731,#33732,#33733,#33734,
#33735,#33736,#33737,#33738,#33739,#33740,#33741,#33742,#33743,#33744,#33745,
#33746,#33747,#33748,#33749,#33750,#33751,#33752,#33753,#33754,#33755,#33756,
#33757,#33758,#33759,#33760,#33761,#33762,#33763,#33764,#33765,#33766,#33767,
#33768,#33769,#33770,#33771,#33772),.UNSPECIFIED.,.F.,.F.,(4,3,3,3,3,3,
3,3,3,3,3,3,3,3,4),(0.,0.0716323242205162,0.144526795992825,0.218759831972576,
0.295253687327703,0.373098000844516,0.455561904732659,0.491819495902303,
0.516601705300829,0.594296253180232,0.673793082756758,0.756412315901387,
0.840926693370429,0.928802722081851,1.),.UNSPECIFIED.);
#4706=B_SPLINE_CURVE_WITH_KNOTS('',3,(#33774,#33775,#33776,#33777,#33778,
#33779,#33780,#33781,#33782,#33783,#33784,#33785,#33786,#33787,#33788,#33789,
#33790,#33791,#33792,#33793,#33794,#33795,#33796,#33797,#33798,#33799,#33800,
#33801,#33802,#33803,#33804,#33805,#33806,#33807,#33808,#33809,#33810,#33811,
#33812,#33813,#33814,#33815,#33816,#33817,#33818,#33819),.UNSPECIFIED.,
 .F.,.F.,(4,3,3,3,3,3,3,3,3,3,3,3,3,3,3,4),(7.38467206403952E-11,0.0897583700602711,
0.176982953433034,0.261917108841852,0.344766431211324,0.424823523659076,
0.490464291980596,0.536349962285305,0.613710139948325,0.622897505068996,
0.699493861903022,0.774620396427266,0.847997624761612,0.923998812380806,
0.995025940368175,1.),.UNSPECIFIED.);
#4707=B_SPLINE_CURVE_WITH_KNOTS('',3,(#33821,#33822,#33823,#33824),
 .UNSPECIFIED.,.F.,.F.,(4,4),(-6.41295025057248E-16,0.0278756418538029),
 .UNSPECIFIED.);
#4708=B_SPLINE_CURVE_WITH_KNOTS('',3,(#33828,#33829,#33830,#33831,#33832,
#33833,#33834,#33835,#33836,#33837,#33838,#33839,#33840,#33841,#33842,#33843,
#33844,#33845,#33846,#33847,#33848,#33849,#33850,#33851,#33852,#33853,#33854,
#33855,#33856,#33857,#33858,#33859,#33860,#33861,#33862,#33863,#33864,#33865,
#33866,#33867,#33868,#33869,#33870),.UNSPECIFIED.,.F.,.F.,(4,3,3,3,3,3,
3,3,3,3,3,3,3,3,4),(7.79555234874296E-9,0.0889978607210674,0.183194287058385,
0.28055722888149,0.374329255247336,0.461125406786596,0.5,0.588364562835439,
0.67625795368133,0.72135216165304,0.75,0.814508811429488,0.878463109607974,
0.94130321201345,1.),.UNSPECIFIED.);
#4709=B_SPLINE_CURVE_WITH_KNOTS('',3,(#33897,#33898,#33899,#33900,#33901),
 .UNSPECIFIED.,.F.,.F.,(4,1,4),(0.,0.5,1.),.UNSPECIFIED.);
#4710=B_SPLINE_CURVE_WITH_KNOTS('',3,(#33922,#33923,#33924,#33925,#33926),
 .UNSPECIFIED.,.F.,.F.,(4,1,4),(0.,0.5,1.),.UNSPECIFIED.);
#4711=B_SPLINE_CURVE_WITH_KNOTS('',3,(#33967,#33968,#33969,#33970,#33971),
 .UNSPECIFIED.,.F.,.F.,(4,1,4),(0.,0.5,1.),.UNSPECIFIED.);
#4712=B_SPLINE_CURVE_WITH_KNOTS('',3,(#33973,#33974,#33975,#33976,#33977,
#33978,#33979,#33980,#33981,#33982,#33983,#33984,#33985,#33986,#33987,#33988,
#33989,#33990,#33991,#33992,#33993,#33994,#33995,#33996,#33997,#33998,#33999,
#34000,#34001,#34002,#34003,#34004,#34005,#34006,#34007,#34008,#34009,#34010,
#34011,#34012,#34013,#34014,#34015,#34016,#34017,#34018,#34019,#34020,#34021,
#34022,#34023,#34024,#34025,#34026,#34027,#34028,#34029,#34030,#34031,#34032,
#34033,#34034,#34035,#34036,#34037,#34038,#34039,#34040,#34041,#34042,#34043,
#34044,#34045,#34046,#34047,#34048,#34049,#34050,#34051,#34052,#34053,#34054,
#34055,#34056,#34057,#34058,#34059,#34060,#34061,#34062,#34063,#34064,#34065,
#34066,#34067,#34068,#34069,#34070,#34071,#34072,#34073,#34074,#34075,#34076,
#34077,#34078,#34079,#34080,#34081),.UNSPECIFIED.,.F.,.F.,(4,3,3,3,3,3,
3,3,3,3,3,3,3,3,3,3,3,3,3,3,3,3,3,3,3,3,3,3,3,3,3,3,3,3,3,3,4),(9.50869433004148E-10,
0.064863221983069,0.131312102384226,0.198704261382311,0.245742670563672,
0.271216744669775,0.292781079745034,0.334751976783175,0.375,0.40625,0.436331962584815,
0.468165981292407,0.5,0.528860419148483,0.558227897183892,0.574915303696629,
0.604443602529392,0.625,0.650713336187918,0.675576986728902,0.6875,0.703616845426758,
0.719884858047724,0.737211484052214,0.75,0.766343175566966,0.78344586044852,
0.800630265602701,0.8125,0.838313265687396,0.861770925358831,0.875,0.907346446278159,
0.938626749059921,0.96931337452996,0.998216178092044,1.),.UNSPECIFIED.);
#4713=B_SPLINE_CURVE_WITH_KNOTS('',3,(#34085,#34086,#34087,#34088,#34089),
 .UNSPECIFIED.,.F.,.F.,(4,1,4),(0.,0.5,1.),.UNSPECIFIED.);
#4714=B_SPLINE_CURVE_WITH_KNOTS('',3,(#34090,#34091,#34092,#34093,#34094,
#34095,#34096,#34097,#34098,#34099,#34100,#34101,#34102,#34103,#34104,#34105,
#34106,#34107,#34108,#34109,#34110,#34111,#34112,#34113,#34114,#34115,#34116,
#34117,#34118,#34119,#34120,#34121,#34122,#34123,#34124,#34125,#34126,#34127,
#34128,#34129,#34130,#34131,#34132,#34133,#34134,#34135,#34136,#34137,#34138,
#34139,#34140,#34141,#34142,#34143,#34144,#34145,#34146,#34147,#34148,#34149,
#34150,#34151,#34152,#34153,#34154,#34155,#34156,#34157,#34158,#34159,#34160,
#34161,#34162,#34163,#34164,#34165,#34166,#34167,#34168,#34169,#34170,#34171,
#34172,#34173,#34174,#34175,#34176,#34177,#34178,#34179,#34180,#34181,#34182,
#34183,#34184,#34185,#34186,#34187,#34188,#34189,#34190,#34191,#34192,#34193,
#34194,#34195,#34196,#34197,#34198),.UNSPECIFIED.,.F.,.F.,(4,3,3,3,3,3,
3,3,3,3,3,3,3,3,3,3,3,3,3,3,3,3,3,3,3,3,3,3,3,3,3,3,3,3,3,3,4),(0.,0.0296418973095737,
0.0604258081289185,0.093085711686443,0.116689283764832,0.127248385310179,
0.150798638890838,0.176339011232883,0.1875,0.204741311027967,0.22207031311766,
0.23836404470778,0.25,0.26729134928062,0.283794412616628,0.299944156860801,
0.3125,0.33705762980703,0.362424480442505,0.375,0.404388595831232,0.424710670503261,
0.45402897903842,0.482927590677032,0.5,0.53125,0.561704981302199,0.593352490651099,
0.625,0.668649466078839,0.707642208611711,0.744186932484857,0.785008080903997,
0.853716986120161,0.921347956753785,0.98763717695582,0.999999999596884),
 .UNSPECIFIED.);
#4715=B_SPLINE_CURVE_WITH_KNOTS('',3,(#34277,#34278,#34279,#34280,#34281,
#34282,#34283,#34284,#34285,#34286,#34287,#34288,#34289,#34290,#34291,#34292),
 .UNSPECIFIED.,.F.,.F.,(4,3,3,3,3,4),(0.,0.378489613306979,0.428567864138002,
0.5,0.880755795327102,0.999999999726984),.UNSPECIFIED.);
#4716=B_SPLINE_CURVE_WITH_KNOTS('',3,(#34361,#34362,#34363,#34364,#34365,
#34366,#34367,#34368,#34369,#34370,#34371,#34372,#34373,#34374,#34375,#34376),
 .UNSPECIFIED.,.F.,.F.,(4,3,3,3,3,4),(0.,0.325364448481703,0.5,0.57143190471632,
0.895046183071909,1.),.UNSPECIFIED.);
#4717=B_SPLINE_CURVE_WITH_KNOTS('',3,(#34425,#34426,#34427,#34428,#34429),
 .UNSPECIFIED.,.F.,.F.,(4,1,4),(0.,0.5,1.),.UNSPECIFIED.);
#4718=B_SPLINE_CURVE_WITH_KNOTS('',3,(#34432,#34433,#34434,#34435,#34436,
#34437,#34438,#34439,#34440,#34441,#34442,#34443,#34444,#34445,#34446,#34447,
#34448,#34449,#34450,#34451,#34452,#34453,#34454,#34455,#34456,#34457,#34458,
#34459,#34460,#34461,#34462,#34463,#34464,#34465,#34466,#34467,#34468,#34469,
#34470,#34471,#34472,#34473,#34474,#34475,#34476,#34477,#34478,#34479,#34480,
#34481,#34482,#34483,#34484,#34485,#34486,#34487,#34488,#34489,#34490,#34491,
#34492,#34493,#34494,#34495,#34496,#34497,#34498,#34499,#34500,#34501,#34502,
#34503,#34504,#34505,#34506,#34507,#34508,#34509,#34510,#34511,#34512,#34513,
#34514,#34515,#34516,#34517,#34518,#34519,#34520,#34521,#34522,#34523,#34524,
#34525,#34526,#34527,#34528,#34529,#34530,#34531),.UNSPECIFIED.,.F.,.F.,
(4,3,3,3,3,3,3,3,3,3,3,3,3,3,3,3,3,3,3,3,3,3,3,3,3,3,3,3,3,3,3,3,3,4),(8.28085893558946E-9,
0.0552178844393513,0.111253198203293,0.167730187412737,0.224716291074559,
0.25,0.284717375651851,0.292623683874908,0.326795374906804,0.359960140751439,
0.375,0.397698184667004,0.420268019738575,0.429176508118321,0.452912127100537,
0.478826556563273,0.5,0.519252068280026,0.539146323381578,0.559113266900889,
0.5625,0.591338765704593,0.619036310556515,0.625,0.671875,0.712890625,0.748779296875,
0.76451831657977,0.810526790289438,0.855241280680679,0.898242859266083,
0.940347367950203,0.981226564540686,1.),.UNSPECIFIED.);
#4719=B_SPLINE_CURVE_WITH_KNOTS('',3,(#34553,#34554,#34555,#34556,#34557),
 .UNSPECIFIED.,.F.,.F.,(4,1,4),(0.,0.5,1.),.UNSPECIFIED.);
#4720=B_SPLINE_CURVE_WITH_KNOTS('',3,(#34559,#34560,#34561,#34562,#34563,
#34564,#34565,#34566,#34567,#34568,#34569,#34570,#34571,#34572,#34573,#34574,
#34575,#34576,#34577,#34578,#34579,#34580,#34581,#34582,#34583,#34584,#34585,
#34586,#34587,#34588,#34589,#34590,#34591,#34592,#34593,#34594,#34595,#34596,
#34597,#34598,#34599,#34600,#34601,#34602,#34603,#34604,#34605,#34606,#34607,
#34608,#34609,#34610,#34611,#34612,#34613,#34614,#34615,#34616,#34617,#34618,
#34619,#34620,#34621,#34622,#34623,#34624,#34625,#34626,#34627,#34628,#34629,
#34630,#34631,#34632,#34633,#34634,#34635,#34636,#34637,#34638,#34639,#34640,
#34641,#34642,#34643,#34644,#34645,#34646,#34647,#34648,#34649,#34650,#34651,
#34652,#34653,#34654,#34655),.UNSPECIFIED.,.F.,.F.,(4,3,3,3,3,3,3,3,3,3,
3,3,3,3,3,3,3,3,3,3,3,3,3,3,3,3,3,3,3,3,3,3,4),(0.,0.0408942616408467,0.0832206641201397,
0.126522189626663,0.170889091742585,0.216425174069665,0.244480347321481,
0.258747200286828,0.299333222619486,0.341557935663049,0.375,0.399411974279286,
0.425040630085084,0.4375,0.455445967163788,0.473207901673359,0.489672437025859,
0.5,0.517525887871923,0.534137976015003,0.550257228344465,0.5625,0.567857537532259,
0.590589154795902,0.613805599783494,0.626758730528618,0.669701832244079,
0.707817003594205,0.744339877777549,0.785751586107263,0.857928261011571,
0.933377839144108,0.999999997060959),.UNSPECIFIED.);
#4721=B_SPLINE_CURVE_WITH_KNOTS('',3,(#34656,#34657,#34658,#34659,#34660),
 .UNSPECIFIED.,.F.,.F.,(4,1,4),(0.,0.5,1.),.UNSPECIFIED.);
#4722=B_SPLINE_CURVE_WITH_KNOTS('',3,(#34716,#34717,#34718,#34719,#34720,
#34721,#34722,#34723,#34724,#34725,#34726,#34727,#34728,#34729,#34730,#34731),
 .UNSPECIFIED.,.F.,.F.,(4,3,3,3,3,4),(0.,0.378838528108035,0.428567885081992,
0.5,0.880990471252908,1.),.UNSPECIFIED.);
#4723=B_SPLINE_CURVE_WITH_KNOTS('',3,(#34782,#34783,#34784,#34785,#34786,
#34787,#34788,#34789,#34790,#34791,#34792,#34793,#34794,#34795,#34796,#34797,
#34798,#34799,#34800,#34801,#34802,#34803,#34804,#34805,#34806,#34807,#34808,
#34809,#34810,#34811,#34812,#34813,#34814,#34815,#34816,#34817,#34818,#34819,
#34820,#34821,#34822,#34823,#34824,#34825,#34826,#34827,#34828,#34829,#34830,
#34831,#34832,#34833,#34834,#34835,#34836,#34837,#34838,#34839,#34840,#34841,
#34842,#34843,#34844,#34845,#34846,#34847,#34848,#34849,#34850,#34851,#34852,
#34853,#34854,#34855,#34856,#34857,#34858,#34859,#34860,#34861,#34862,#34863,
#34864,#34865,#34866,#34867,#34868,#34869,#34870,#34871,#34872,#34873,#34874,
#34875,#34876,#34877,#34878,#34879,#34880,#34881,#34882,#34883,#34884,#34885,
#34886,#34887,#34888,#34889,#34890,#34891,#34892,#34893,#34894,#34895,#34896,
#34897,#34898,#34899,#34900,#34901,#34902,#34903,#34904,#34905,#34906,#34907,
#34908),.UNSPECIFIED.,.F.,.F.,(4,3,3,3,3,3,3,3,3,3,3,3,3,3,3,3,3,3,3,3,
3,3,3,3,3,3,3,3,3,3,3,3,3,3,3,3,3,3,3,3,3,3,4),(1.08713676683881E-6,0.0253729853192074,
0.0513308233851344,0.0782397502780801,0.105795505246966,0.134043455634498,
0.163480063669367,0.193633546238024,0.225040356870188,0.25000064499507,
0.25180848200201,0.280864303031013,0.31038422769088,0.340225351193865,0.370585868249604,
0.375000472371881,0.399665914710962,0.425336526359969,0.451391695779364,
0.477666894694449,0.500000299748691,0.526474434682188,0.552475702509946,
0.577564104772746,0.591573374015089,0.617328555218517,0.625000127125502,
0.657081090188579,0.687649553329843,0.717839618870443,0.739172333185156,
0.749646883699591,0.758744089052946,0.789470024697239,0.818441934309589,
0.846927003388438,0.874763193931298,0.881647831630121,0.909624284594177,
0.936792477667145,0.96352443700452,0.989655417477855,0.999999578861769),
 .UNSPECIFIED.);
#4724=B_SPLINE_CURVE_WITH_KNOTS('',3,(#34917,#34918,#34919,#34920,#34921,
#34922,#34923,#34924,#34925,#34926,#34927,#34928,#34929,#34930,#34931,#34932,
#34933,#34934,#34935,#34936,#34937,#34938,#34939,#34940,#34941,#34942,#34943,
#34944,#34945,#34946,#34947,#34948,#34949,#34950,#34951,#34952,#34953,#34954,
#34955,#34956,#34957,#34958,#34959,#34960,#34961,#34962,#34963,#34964,#34965,
#34966,#34967,#34968,#34969,#34970,#34971,#34972,#34973,#34974,#34975,#34976,
#34977,#34978,#34979,#34980,#34981,#34982,#34983,#34984,#34985,#34986,#34987,
#34988,#34989,#34990,#34991,#34992,#34993,#34994,#34995,#34996,#34997,#34998,
#34999,#35000,#35001,#35002,#35003,#35004,#35005,#35006,#35007,#35008,#35009,
#35010,#35011,#35012,#35013,#35014,#35015,#35016,#35017,#35018,#35019,#35020,
#35021,#35022,#35023,#35024,#35025,#35026,#35027,#35028,#35029,#35030,#35031,
#35032,#35033,#35034,#35035,#35036,#35037,#35038,#35039,#35040,#35041,#35042,
#35043),.UNSPECIFIED.,.F.,.F.,(4,3,3,3,3,3,3,3,3,3,3,3,3,3,3,3,3,3,3,3,
3,3,3,3,3,3,3,3,3,3,3,3,3,3,3,3,3,3,3,3,3,3,4),(1.08713762107833E-6,0.0253692683258832,
0.0513234992405872,0.0782290700879875,0.105781621242702,0.134026543196543,
0.163460560671953,0.19361167999425,0.22501677366322,0.250000644995036,0.251815578359345,
0.2808759939263,0.310399895492973,0.340244679558423,0.370608357701857,0.375000472371454,
0.399666898556133,0.425338325647047,0.451394209332918,0.477669972962536,
0.500000299747871,0.526474352610384,0.552475539975355,0.577563818899365,
0.591581618974246,0.617336551276599,0.625000127124289,0.657081197597214,
0.687648823919612,0.717838134287772,0.739167737135864,0.749641056657721,
0.758741560237412,0.789468342904982,0.818440329506418,0.846925581513678,
0.874762081841044,0.881648690907691,0.909625495740547,0.936794182595149,
0.96352670545363,0.989658359681576,0.999999578853041),.UNSPECIFIED.);
#4725=B_SPLINE_CURVE_WITH_KNOTS('',3,(#35064,#35065,#35066,#35067,#35068,
#35069,#35070,#35071,#35072,#35073,#35074,#35075,#35076,#35077,#35078,#35079,
#35080,#35081,#35082,#35083,#35084,#35085,#35086,#35087,#35088,#35089,#35090,
#35091,#35092,#35093,#35094,#35095,#35096,#35097,#35098,#35099,#35100,#35101,
#35102,#35103,#35104,#35105,#35106),.UNSPECIFIED.,.F.,.F.,(4,3,3,3,3,3,
3,3,3,3,3,3,3,3,4),(0.,0.0368913268728807,0.0761980387383731,0.119167016457251,
0.169092204071419,0.216272726579617,0.218863755765662,0.250005492808558,
0.263232719609054,0.303098623176284,0.345222468308616,0.395387158872228,
0.449030523619011,0.495408776557437,0.500000000000007),.UNSPECIFIED.);
#4726=B_SPLINE_CURVE_WITH_KNOTS('',3,(#35108,#35109,#35110,#35111,#35112,
#35113,#35114,#35115,#35116,#35117,#35118,#35119,#35120,#35121,#35122,#35123,
#35124,#35125,#35126,#35127,#35128,#35129,#35130,#35131,#35132,#35133,#35134,
#35135,#35136,#35137,#35138,#35139,#35140,#35141,#35142,#35143,#35144,#35145,
#35146,#35147,#35148,#35149,#35150),.UNSPECIFIED.,.F.,.F.,(4,3,3,3,3,3,
3,3,3,3,3,3,3,3,4),(0.500000000000007,0.540231440446096,0.575907930766046,
0.616907828400421,0.66554474376712,0.70735165079623,0.741976468153254,0.775467219069365,
0.806644744625195,0.841768598836816,0.881832664912684,0.913950883313768,
0.943105681993427,0.971552840996714,1.),.UNSPECIFIED.);
#4727=B_SPLINE_CURVE_WITH_KNOTS('',3,(#35157,#35158,#35159,#35160,#35161,
#35162,#35163,#35164,#35165,#35166,#35167,#35168,#35169,#35170,#35171,#35172,
#35173,#35174,#35175,#35176,#35177,#35178,#35179,#35180,#35181,#35182,#35183,
#35184,#35185,#35186,#35187,#35188,#35189,#35190,#35191,#35192,#35193,#35194,
#35195,#35196),.UNSPECIFIED.,.F.,.F.,(4,3,3,3,3,3,3,3,3,3,3,3,3,4),(0.,
0.0284098719480376,0.0590023475385172,0.0917001351016763,0.127782382300734,
0.171359932009271,0.213975795305431,0.249728820892251,0.283042209140671,
0.320741065391291,0.356620100856134,0.396246461605651,0.450189504686733,
0.499999999999992),.UNSPECIFIED.);
#4728=B_SPLINE_CURVE_WITH_KNOTS('',3,(#35198,#35199,#35200,#35201,#35202,
#35203,#35204,#35205,#35206,#35207,#35208,#35209,#35210,#35211,#35212,#35213,
#35214,#35215,#35216,#35217,#35218,#35219,#35220,#35221,#35222,#35223,#35224,
#35225,#35226,#35227,#35228,#35229,#35230,#35231,#35232,#35233,#35234,#35235,
#35236,#35237,#35238,#35239,#35240,#35241,#35242,#35243,#35244,#35245,#35246,
#35247,#35248,#35249),.UNSPECIFIED.,.F.,.F.,(4,3,3,3,3,3,3,3,3,3,3,3,3,
3,3,3,3,4),(0.499999999999992,0.538073908915271,0.57297079991496,0.613353241995181,
0.625000443284623,0.64966183222417,0.705676282718174,0.734756501148294,
0.749998455844975,0.768090688025888,0.801401960047338,0.837845430322982,
0.874999145332787,0.884823067242886,0.926484734258874,0.963242367129437,
0.994908278170022,1.),.UNSPECIFIED.);
#4729=B_SPLINE_CURVE_WITH_KNOTS('',3,(#35267,#35268,#35269,#35270,#35271,
#35272,#35273,#35274,#35275,#35276,#35277,#35278,#35279,#35280,#35281,#35282,
#35283,#35284,#35285,#35286,#35287,#35288,#35289,#35290,#35291,#35292,#35293,
#35294,#35295,#35296,#35297,#35298,#35299,#35300,#35301,#35302,#35303,#35304,
#35305,#35306),.UNSPECIFIED.,.F.,.F.,(4,3,3,3,3,3,3,3,3,3,3,3,3,4),(0.,
0.028409871948072,0.0590023475385537,0.0917001351017092,0.127782382300744,
0.171359932009437,0.213975795305572,0.249728820892374,0.283042209140762,
0.320741065391331,0.356620100856162,0.396246461605714,0.450189504720798,
0.49999999999999),.UNSPECIFIED.);
#4730=B_SPLINE_CURVE_WITH_KNOTS('',3,(#35308,#35309,#35310,#35311,#35312,
#35313,#35314,#35315,#35316,#35317,#35318,#35319,#35320,#35321,#35322,#35323,
#35324,#35325,#35326,#35327,#35328,#35329,#35330,#35331,#35332,#35333,#35334,
#35335,#35336,#35337,#35338,#35339,#35340,#35341,#35342,#35343,#35344,#35345,
#35346,#35347,#35348,#35349,#35350,#35351,#35352,#35353,#35354,#35355,#35356,
#35357,#35358,#35359),.UNSPECIFIED.,.F.,.F.,(4,3,3,3,3,3,3,3,3,3,3,3,3,
3,3,3,3,4),(0.49999999999999,0.538073908915264,0.572970799914942,0.613353241995137,
0.625000443610254,0.649661832224122,0.705673442739849,0.73475650108139,
0.749998464717221,0.768090687960155,0.801401959928307,0.837845430187727,
0.874999156444846,0.884823067034441,0.926484734096338,0.963242367048169,
0.994908278091935,1.),.UNSPECIFIED.);
#4731=B_SPLINE_CURVE_WITH_KNOTS('',3,(#35368,#35369,#35370,#35371,#35372,
#35373,#35374,#35375,#35376,#35377,#35378,#35379,#35380,#35381,#35382,#35383,
#35384,#35385,#35386,#35387,#35388,#35389,#35390,#35391,#35392,#35393,#35394,
#35395,#35396,#35397,#35398,#35399,#35400,#35401,#35402,#35403,#35404),
 .UNSPECIFIED.,.F.,.F.,(4,3,3,3,3,3,3,3,3,3,3,3,4),(0.,0.0368913268731333,
0.0761980387362311,0.119167016457156,0.169092204070516,0.218863755764898,
0.249960752574137,0.26323271960796,0.30309862317623,0.345222468307133,0.395387158870675,
0.449030523615986,0.500000000000014),.UNSPECIFIED.);
#4732=B_SPLINE_CURVE_WITH_KNOTS('',3,(#35406,#35407,#35408,#35409,#35410,
#35411,#35412,#35413,#35414,#35415,#35416,#35417,#35418,#35419,#35420,#35421,
#35422,#35423,#35424,#35425,#35426,#35427,#35428,#35429,#35430,#35431,#35432,
#35433,#35434,#35435,#35436,#35437,#35438,#35439,#35440,#35441,#35442,#35443,
#35444,#35445,#35446,#35447,#35448,#35449,#35450,#35451,#35452,#35453,#35454,
#35455,#35456,#35457,#35458,#35459,#35460,#35461,#35462,#35463),
 .UNSPECIFIED.,.F.,.F.,(4,3,3,3,3,3,3,3,3,3,3,3,3,3,3,3,3,3,3,4),(0.500000000000014,
0.540231440447499,0.575907930767047,0.600002183613558,0.616907828401668,
0.665544743768066,0.699999206805276,0.707351650797058,0.741976468153578,
0.775467219067,0.800000218928215,0.806644744622415,0.841768598832897,0.881832664910351,
0.899996946356766,0.91395088331162,0.943105681991698,0.971552840995849,
0.997194386346092,1.),.UNSPECIFIED.);
#4733=B_SPLINE_CURVE_WITH_KNOTS('',3,(#35526,#35527,#35528,#35529,#35530,
#35531,#35532,#35533,#35534,#35535,#35536,#35537,#35538,#35539,#35540,#35541,
#35542,#35543,#35544,#35545,#35546,#35547,#35548,#35549,#35550,#35551,#35552,
#35553,#35554,#35555,#35556,#35557,#35558,#35559,#35560,#35561,#35562,#35563,
#35564,#35565,#35566,#35567,#35568,#35569,#35570,#35571,#35572,#35573,#35574,
#35575,#35576,#35577,#35578,#35579,#35580,#35581,#35582,#35583,#35584,#35585,
#35586,#35587,#35588,#35589,#35590,#35591,#35592),.UNSPECIFIED.,.F.,.F.,
(4,3,3,3,3,3,3,3,3,3,3,3,3,3,3,3,3,3,3,3,3,3,4),(1.7879470251477E-8,0.0544641113842017,
0.10763785991851,0.141927033263651,0.195963516631825,0.25,0.294608088152731,
0.338155471441689,0.383293912026307,0.426098031464226,0.428432352610924,
0.471559526743072,0.5,0.553966480593871,0.60862548605439,0.663343492579519,
0.714737499315956,0.75,0.803318033187661,0.856609320553095,0.908545562867855,
0.957979634374208,1.),.UNSPECIFIED.);
#4734=B_SPLINE_CURVE_WITH_KNOTS('',3,(#35600,#35601,#35602,#35603,#35604,
#35605,#35606,#35607,#35608,#35609,#35610,#35611,#35612,#35613,#35614,#35615,
#35616,#35617,#35618,#35619,#35620,#35621,#35622,#35623,#35624,#35625,#35626,
#35627,#35628,#35629,#35630,#35631,#35632,#35633,#35634,#35635,#35636,#35637,
#35638,#35639,#35640,#35641,#35642,#35643,#35644,#35645,#35646,#35647,#35648,
#35649,#35650,#35651,#35652,#35653,#35654,#35655,#35656,#35657,#35658,#35659,
#35660,#35661,#35662,#35663,#35664,#35665,#35666),.UNSPECIFIED.,.F.,.F.,
(4,3,3,3,3,3,3,3,3,3,3,3,3,3,3,3,3,3,3,3,3,3,4),(1.7906183555336E-8,0.0544493993128118,
0.10761181334858,0.141926453999837,0.195963226999919,0.25,0.294608168733892,
0.338155786098323,0.383294230516945,0.426099296174454,0.428432674935567,
0.471560796389448,0.5,0.553976193478826,0.608644542203803,0.663371094483038,
0.714737419816793,0.75,0.803294344985328,0.856564174751774,0.90847990092177,
0.957892698066782,1.),.UNSPECIFIED.);
#4735=B_SPLINE_CURVE_WITH_KNOTS('',3,(#35675,#35676,#35677,#35678,#35679,
#35680,#35681,#35682,#35683,#35684,#35685,#35686,#35687,#35688,#35689,#35690,
#35691,#35692,#35693,#35694,#35695,#35696,#35697,#35698,#35699,#35700,#35701,
#35702,#35703,#35704,#35705,#35706,#35707,#35708,#35709,#35710,#35711,#35712,
#35713,#35714,#35715,#35716,#35717,#35718,#35719,#35720,#35721,#35722,#35723,
#35724,#35725,#35726,#35727,#35728,#35729,#35730,#35731,#35732,#35733,#35734,
#35735,#35736,#35737,#35738),.UNSPECIFIED.,.F.,.F.,(4,3,3,3,3,3,3,3,3,3,
3,3,3,3,3,3,3,3,3,3,3,4),(1.01804965592672E-8,0.0674956426259411,0.138714963219262,
0.212926975143168,0.288383846137006,0.36250779776971,0.431898256099993,
0.5,0.541878056547161,0.584665979131202,0.611759345172909,0.625,0.662482092180958,
0.700404290399306,0.735034420801422,0.75,0.798961650444334,0.845940519174992,
0.889742214457647,0.932253827334583,0.973546712256856,0.999999972984831),
 .UNSPECIFIED.);
#4736=B_SPLINE_CURVE_WITH_KNOTS('',3,(#35743,#35744,#35745,#35746,#35747,
#35748,#35749,#35750,#35751,#35752),.UNSPECIFIED.,.F.,.F.,(4,3,3,4),(0.,
0.42857142857143,0.714285714285716,1.),.UNSPECIFIED.);
#4737=B_SPLINE_CURVE_WITH_KNOTS('',3,(#35755,#35756,#35757,#35758,#35759,
#35760,#35761,#35762,#35763,#35764,#35765,#35766,#35767,#35768,#35769,#35770,
#35771,#35772,#35773,#35774,#35775,#35776,#35777,#35778,#35779,#35780,#35781,
#35782,#35783,#35784,#35785,#35786,#35787,#35788,#35789,#35790,#35791,#35792,
#35793,#35794,#35795,#35796,#35797,#35798,#35799,#35800,#35801,#35802,#35803,
#35804,#35805,#35806,#35807,#35808,#35809,#35810,#35811,#35812,#35813,#35814,
#35815,#35816,#35817,#35818,#35819,#35820,#35821,#35822,#35823,#35824,#35825,
#35826,#35827,#35828,#35829,#35830,#35831,#35832,#35833,#35834,#35835,#35836,
#35837,#35838,#35839,#35840,#35841,#35842,#35843,#35844,#35845,#35846,#35847,
#35848,#35849,#35850,#35851,#35852,#35853,#35854,#35855,#35856,#35857,#35858,
#35859,#35860,#35861,#35862,#35863,#35864,#35865,#35866,#35867,#35868,#35869,
#35870,#35871,#35872),.UNSPECIFIED.,.F.,.F.,(4,3,3,3,3,3,3,3,3,3,3,3,3,
3,3,3,3,3,3,3,3,3,3,3,3,3,3,3,3,3,3,3,3,3,3,3,3,3,3,4),(2.09594836513411E-6,
0.0362368855133033,0.0713793079045761,0.104366733968935,0.125,0.150223343700009,
0.175167507775006,0.199929074279579,0.22578822564545,0.25,0.269723486186228,
0.289431954020272,0.294108349209741,0.3125,0.335287917621303,0.356444040105461,
0.375,0.393959218999002,0.413183866517193,0.433771679580868,0.4375,0.455553787946069,
0.474276297677037,0.492506086676878,0.5,0.527772795208352,0.552085539668685,
0.567585659108842,0.590139769886137,0.61300015092207,0.625,0.65804072788561,
0.692414283119677,0.728093266086251,0.75,0.764952801403825,0.823714601052869,
0.882382362080814,0.94182503340941,1.),.UNSPECIFIED.);
#4738=B_SPLINE_CURVE_WITH_KNOTS('',3,(#35874,#35875,#35876,#35877,#35878,
#35879,#35880,#35881,#35882,#35883,#35884,#35885,#35886,#35887,#35888,#35889,
#35890,#35891,#35892,#35893,#35894,#35895,#35896,#35897,#35898,#35899,#35900,
#35901,#35902,#35903,#35904,#35905,#35906,#35907,#35908,#35909,#35910,#35911,
#35912,#35913,#35914,#35915,#35916,#35917,#35918,#35919,#35920,#35921,#35922,
#35923,#35924,#35925),.UNSPECIFIED.,.F.,.F.,(4,3,3,3,3,3,3,3,3,3,3,3,3,
3,3,3,3,4),(0.,0.0627598550136615,0.126872753767448,0.19452677037842,0.25,
0.301397320786533,0.356522161503298,0.41273584097034,0.467853321258038,
0.5,0.570546483708575,0.638513332075588,0.705058089478895,0.770913837689033,
0.83688345572248,0.903355444568615,0.971653796741299,0.999999746571654),
 .UNSPECIFIED.);
#4739=B_SPLINE_CURVE_WITH_KNOTS('',3,(#35932,#35933,#35934,#35935),
 .UNSPECIFIED.,.F.,.F.,(4,4),(0.,1.),.UNSPECIFIED.);
#4740=B_SPLINE_CURVE_WITH_KNOTS('',3,(#35945,#35946,#35947,#35948),
 .UNSPECIFIED.,.F.,.F.,(4,4),(0.,1.),.UNSPECIFIED.);
#4741=B_SPLINE_CURVE_WITH_KNOTS('',3,(#35950,#35951,#35952,#35953,#35954,
#35955,#35956,#35957,#35958,#35959,#35960,#35961,#35962,#35963,#35964,#35965,
#35966,#35967,#35968,#35969,#35970,#35971,#35972,#35973,#35974,#35975,#35976,
#35977,#35978,#35979,#35980,#35981,#35982,#35983,#35984,#35985,#35986,#35987,
#35988,#35989,#35990,#35991,#35992,#35993,#35994,#35995,#35996,#35997,#35998,
#35999,#36000,#36001,#36002,#36003,#36004,#36005,#36006,#36007,#36008,#36009,
#36010,#36011,#36012,#36013),.UNSPECIFIED.,.F.,.F.,(4,3,3,3,3,3,3,3,3,3,
3,3,3,3,3,3,3,3,3,3,3,4),(1.01791444121861E-8,0.0674974370079685,0.13871842374344,
0.212931953605264,0.288390284697454,0.362515810160677,0.431908283539235,
0.5,0.541879986354516,0.584669516084516,0.611755690842619,0.625,0.662483329316775,
0.700406499985365,0.735038008516436,0.75,0.798963739946212,0.84594465379999,
0.88974914645965,0.932263888513565,0.973560466245504,0.99999997279333),
 .UNSPECIFIED.);
#4742=B_SPLINE_CURVE_WITH_KNOTS('',3,(#36016,#36017,#36018,#36019,#36020,
#36021,#36022,#36023,#36024,#36025,#36026,#36027,#36028,#36029,#36030,#36031,
#36032,#36033,#36034,#36035,#36036,#36037,#36038,#36039,#36040,#36041,#36042,
#36043,#36044,#36045,#36046,#36047,#36048,#36049,#36050,#36051,#36052,#36053,
#36054,#36055,#36056,#36057,#36058,#36059,#36060,#36061,#36062,#36063,#36064,
#36065,#36066,#36067,#36068,#36069,#36070,#36071,#36072,#36073,#36074,#36075,
#36076,#36077,#36078,#36079,#36080,#36081,#36082,#36083,#36084,#36085,#36086,
#36087,#36088,#36089,#36090,#36091),.UNSPECIFIED.,.F.,.F.,(4,3,3,3,3,3,
3,3,3,3,3,3,3,3,3,3,3,3,3,3,3,3,3,3,3,4),(0.,0.0554401597712347,0.10732038858961,
0.156759507170221,0.20337975358511,0.247578441959007,0.25,0.29129242264859,
0.305861600550399,0.344385389985209,0.384621885394755,0.425632328280576,
0.466977350818536,0.5,0.548416682808532,0.570999040361935,0.620585480122461,
0.672075056424976,0.725350195717724,0.75,0.784694722918199,0.833887024596645,
0.884158599282672,0.934750466898511,0.98556244983833,0.999999999015558),
 .UNSPECIFIED.);
#4743=B_SPLINE_CURVE_WITH_KNOTS('',3,(#36093,#36094,#36095,#36096,#36097,
#36098,#36099,#36100,#36101,#36102,#36103,#36104,#36105,#36106,#36107,#36108,
#36109,#36110,#36111,#36112,#36113,#36114,#36115,#36116,#36117,#36118,#36119,
#36120,#36121,#36122,#36123,#36124,#36125,#36126,#36127,#36128,#36129,#36130,
#36131,#36132,#36133,#36134,#36135,#36136,#36137,#36138,#36139,#36140,#36141,
#36142,#36143,#36144),.UNSPECIFIED.,.F.,.F.,(4,3,3,3,3,3,3,3,3,3,3,3,3,
3,3,3,3,4),(0.,0.0627648251215824,0.126882565029156,0.194540852473979,0.25,
0.301400767598046,0.356528387849084,0.412744420751568,0.467864176451785,
0.5,0.570545723880762,0.638512682115047,0.705058042936707,0.770914731967958,
0.836885701249181,0.903359297201857,0.971659719708859,0.999999746561536),
 .UNSPECIFIED.);
#4744=B_SPLINE_CURVE_WITH_KNOTS('',3,(#36152,#36153,#36154,#36155,#36156,
#36157),.UNSPECIFIED.,.F.,.F.,(4,1,1,4),(0.,0.285714285714286,0.571428571428571,
1.),.UNSPECIFIED.);
#4745=B_SPLINE_CURVE_WITH_KNOTS('',3,(#36200,#36201,#36202,#36203,#36204,
#36205,#36206,#36207,#36208,#36209),.UNSPECIFIED.,.F.,.F.,(4,3,3,4),(0.,
0.428571428571401,0.714285714285701,1.),.UNSPECIFIED.);
#4746=B_SPLINE_CURVE_WITH_KNOTS('',3,(#36256,#36257,#36258,#36259,#36260,
#36261,#36262,#36263,#36264,#36265,#36266,#36267,#36268),.UNSPECIFIED.,
 .F.,.F.,(4,3,3,3,4),(-1.,-0.785714285714286,-0.571428571428571,-0.490858603324517,
-0.490726906251567),.UNSPECIFIED.);
#4747=B_SPLINE_CURVE_WITH_KNOTS('',3,(#36269,#36270,#36271,#36272,#36273,
#36274,#36275,#36276,#36277,#36278),.UNSPECIFIED.,.F.,.F.,(4,3,3,4),(-0.425956949925924,
-0.383314880227184,-0.285714285714286,0.),.UNSPECIFIED.);
#4748=B_SPLINE_CURVE_WITH_KNOTS('',3,(#36329,#36330,#36331,#36332,#36333,
#36334),.UNSPECIFIED.,.F.,.F.,(4,1,1,4),(0.,0.285714285714286,0.571428571428571,
1.),.UNSPECIFIED.);
#4749=B_SPLINE_CURVE_WITH_KNOTS('',3,(#36431,#36432,#36433,#36434,#36435),
 .UNSPECIFIED.,.F.,.F.,(4,1,4),(-1.,-0.785714285714286,-0.574071439326816),
 .UNSPECIFIED.);
#4750=B_SPLINE_CURVE_WITH_KNOTS('',3,(#36436,#36437,#36438,#36439,#36440,
#36441),.UNSPECIFIED.,.F.,.F.,(4,1,1,4),(-0.509141408999513,-0.285714285714286,
-0.142857142857143,-2.45693890781057E-8),.UNSPECIFIED.);
#4751=B_SPLINE_CURVE_WITH_KNOTS('',3,(#36487,#36488,#36489,#36490,#36491,
#36492,#36493,#36494,#36495,#36496,#36497,#36498,#36499,#36500,#36501,#36502,
#36503,#36504,#36505,#36506,#36507,#36508,#36509,#36510,#36511,#36512,#36513,
#36514,#36515,#36516,#36517,#36518,#36519,#36520,#36521,#36522,#36523,#36524,
#36525,#36526),.UNSPECIFIED.,.F.,.F.,(4,3,3,3,3,3,3,3,3,3,3,3,3,4),(0.,
0.0285696457646304,0.059348287923574,0.0922695400873604,0.128658037533218,
0.17317619773752,0.215434756768923,0.24999994336233,0.284329878936637,0.321489930755007,
0.357347487857236,0.396974917385387,0.448567973551295,0.500000000000007),
 .UNSPECIFIED.);
#4752=B_SPLINE_CURVE_WITH_KNOTS('',3,(#36528,#36529,#36530,#36531,#36532,
#36533,#36534,#36535,#36536,#36537,#36538,#36539,#36540,#36541,#36542,#36543,
#36544,#36545,#36546,#36547,#36548,#36549,#36550,#36551,#36552,#36553,#36554,
#36555,#36556,#36557,#36558,#36559,#36560,#36561,#36562,#36563,#36564,#36565,
#36566,#36567,#36568,#36569,#36570,#36571,#36572,#36573,#36574,#36575,#36576,
#36577,#36578,#36579),.UNSPECIFIED.,.F.,.F.,(4,3,3,3,3,3,3,3,3,3,3,3,3,
3,3,3,3,4),(0.500000000000007,0.538056732668972,0.572871871606032,0.612740726767319,
0.625000514049154,0.647999609500923,0.701674313067634,0.734101547705753,
0.749998510612295,0.767338854242534,0.798973747757443,0.832095090992758,
0.873045873217363,0.875000014654403,0.914441264010961,0.94811427585218,
0.977602415915691,1.),.UNSPECIFIED.);
#4753=B_SPLINE_CURVE_WITH_KNOTS('',3,(#36587,#36588,#36589,#36590,#36591,
#36592,#36593,#36594,#36595,#36596,#36597,#36598,#36599,#36600,#36601,#36602,
#36603,#36604,#36605,#36606,#36607,#36608,#36609,#36610,#36611,#36612,#36613,
#36614,#36615,#36616,#36617,#36618,#36619,#36620,#36621,#36622,#36623,#36624,
#36625,#36626,#36627,#36628,#36629),.UNSPECIFIED.,.F.,.F.,(4,3,3,3,3,3,
3,3,3,3,3,3,3,3,4),(0.,0.0353318566377657,0.0730191394615732,0.114351907515687,
0.163216552094514,0.211443416641321,0.250001933206496,0.254119944601432,
0.295020596415364,0.334732069954391,0.380153205613029,0.435790044413761,
0.440076602806511,0.485111878327517,0.499999999999993),.UNSPECIFIED.);
#4754=B_SPLINE_CURVE_WITH_KNOTS('',3,(#36631,#36632,#36633,#36634,#36635,
#36636,#36637,#36638,#36639,#36640,#36641,#36642,#36643,#36644,#36645,#36646,
#36647,#36648,#36649,#36650,#36651,#36652,#36653,#36654,#36655,#36656,#36657,
#36658,#36659,#36660,#36661,#36662,#36663,#36664,#36665,#36666,#36667,#36668,
#36669,#36670,#36671,#36672,#36673,#36674,#36675,#36676,#36677,#36678,#36679,
#36680,#36681,#36682,#36683,#36684,#36685),.UNSPECIFIED.,.F.,.F.,(4,3,3,
3,3,3,3,3,3,3,3,3,3,3,3,3,3,3,4),(0.499999999999993,0.538228510937549,0.57261811237588,
0.611136564241997,0.624999594168192,0.662528537230352,0.70171161982388,
0.738471222455074,0.750000384379003,0.769424740516382,0.799021130342759,
0.832591829631508,0.874999988961863,0.876270455868128,0.908246383615204,
0.93702276520752,0.963921502904887,0.989016335030508,1.),.UNSPECIFIED.);
#4755=B_SPLINE_CURVE_WITH_KNOTS('',3,(#36689,#36690,#36691,#36692,#36693,
#36694,#36695,#36696,#36697,#36698,#36699,#36700,#36701,#36702,#36703,#36704,
#36705,#36706,#36707,#36708,#36709,#36710,#36711,#36712,#36713,#36714,#36715,
#36716,#36717,#36718,#36719,#36720,#36721,#36722,#36723,#36724,#36725,#36726,
#36727,#36728,#36729,#36730,#36731,#36732,#36733,#36734,#36735,#36736,#36737),
 .UNSPECIFIED.,.F.,.F.,(4,3,3,3,3,3,3,3,3,3,3,3,3,3,3,3,4),(0.,0.0277115508593106,
0.0575132928738458,0.0892928307203169,0.124191418268873,0.16287749140167,
0.207314051449655,0.243899795018448,0.249999245232598,0.276595251255318,
0.321635882265037,0.35630631526064,0.394264716056138,0.442266582651423,
0.491729649234039,0.494822546424663,0.5),.UNSPECIFIED.);
#4756=B_SPLINE_CURVE_WITH_KNOTS('',3,(#36739,#36740,#36741,#36742,#36743,
#36744,#36745,#36746,#36747,#36748,#36749,#36750,#36751,#36752,#36753,#36754,
#36755,#36756,#36757,#36758,#36759,#36760,#36761,#36762,#36763,#36764,#36765,
#36766,#36767,#36768,#36769,#36770,#36771,#36772,#36773,#36774,#36775,#36776,
#36777,#36778,#36779,#36780,#36781,#36782,#36783,#36784,#36785,#36786,#36787,
#36788,#36789,#36790,#36791,#36792,#36793),.UNSPECIFIED.,.F.,.F.,(4,3,3,
3,3,3,3,3,3,3,3,3,3,3,3,3,3,3,4),(0.5,0.537239517842477,0.571267419999329,
0.60000023437658,0.604177952387017,0.636932590355555,0.675816582113657,
0.699998677100897,0.719212264847768,0.754310731741797,0.785903153475507,
0.799998093316436,0.822164336643169,0.85924878743378,0.899999668106654,
0.9094963847687,0.945302800831868,0.976034264503836,1.),.UNSPECIFIED.);
#4757=B_SPLINE_CURVE_WITH_KNOTS('',3,(#36801,#36802,#36803,#36804,#36805,
#36806,#36807,#36808,#36809,#36810,#36811,#36812,#36813,#36814,#36815,#36816,
#36817,#36818,#36819,#36820,#36821,#36822,#36823,#36824,#36825,#36826,#36827,
#36828,#36829,#36830,#36831,#36832,#36833,#36834,#36835,#36836,#36837,#36838,
#36839,#36840,#36841,#36842,#36843),.UNSPECIFIED.,.F.,.F.,(4,3,3,3,3,3,
3,3,3,3,3,3,3,3,4),(0.,0.0344376547822176,0.0710064408657388,0.110780989064105,
0.156733973707749,0.204256457401742,0.208600103211698,0.250001795179384,
0.250374862820422,0.291570761515907,0.330497562072642,0.373229759451764,
0.427838022470079,0.481356386584631,0.5),.UNSPECIFIED.);
#4758=B_SPLINE_CURVE_WITH_KNOTS('',3,(#36845,#36846,#36847,#36848,#36849,
#36850,#36851,#36852,#36853,#36854,#36855,#36856,#36857,#36858,#36859,#36860,
#36861,#36862,#36863,#36864,#36865,#36866,#36867,#36868,#36869,#36870,#36871,
#36872,#36873,#36874,#36875,#36876,#36877,#36878,#36879,#36880,#36881,#36882,
#36883,#36884,#36885,#36886,#36887,#36888,#36889,#36890),.UNSPECIFIED.,
 .F.,.F.,(4,3,3,3,3,3,3,3,3,3,3,3,3,3,3,4),(0.5,0.540378245096155,0.585951807775509,
0.623241278452408,0.674044368801094,0.714788822700957,0.750440219863337,
0.781861901573703,0.811713629939723,0.845989725787873,0.874998830598758,
0.887428293306222,0.919050183300004,0.947591071797292,0.973795535898646,
1.),.UNSPECIFIED.);
#4759=B_SPLINE_CURVE_WITH_KNOTS('',3,(#36895,#36896,#36897,#36898,#36899,
#36900,#36901,#36902,#36903,#36904,#36905,#36906,#36907,#36908,#36909,#36910),
 .UNSPECIFIED.,.F.,.F.,(4,3,3,3,3,4),(-0.000416812968309855,0.,0.00968244332514642,
0.0194501133270711,0.029215394506231,0.0389794169068087),.UNSPECIFIED.);
#4760=B_SPLINE_CURVE_WITH_KNOTS('',3,(#36915,#36916,#36917,#36918,#36919,
#36920,#36921,#36922,#36923,#36924,#36925,#36926,#36927,#36928,#36929,#36930),
 .UNSPECIFIED.,.F.,.F.,(4,3,3,3,3,4),(-0.0393958803013624,-0.0389790710315925,
-0.0292967136214389,-0.0195291302907795,-0.00976393576167903,0.),
 .UNSPECIFIED.);
#4761=B_SPLINE_CURVE_WITH_KNOTS('',3,(#36932,#36933,#36934,#36935,#36936,
#36937,#36938,#36939,#36940,#36941,#36942,#36943,#36944,#36945,#36946,#36947),
 .UNSPECIFIED.,.F.,.F.,(4,3,3,3,3,4),(-0.000416812968258738,0.,0.00968244332499932,
0.0194501133267216,0.0292153945056907,0.0389794169060713),.UNSPECIFIED.);
#4762=B_SPLINE_CURVE_WITH_KNOTS('',3,(#36952,#36953,#36954,#36955,#36956,
#36957,#36958,#36959,#36960,#36961,#36962,#36963,#36964,#36965,#36966,#36967),
 .UNSPECIFIED.,.F.,.F.,(4,3,3,3,3,4),(-0.0393958803013714,-0.0389790710316,
-0.0292967136214534,-0.0195291302907914,-0.00976393576168223,0.),
 .UNSPECIFIED.);
#4763=B_SPLINE_CURVE_WITH_KNOTS('',3,(#36978,#36979,#36980,#36981,#36982,
#36983,#36984,#36985,#36986,#36987,#36988,#36989,#36990,#36991,#36992,#36993,
#36994,#36995,#36996,#36997,#36998,#36999,#37000,#37001,#37002),
 .UNSPECIFIED.,.F.,.F.,(4,3,3,3,3,3,3,3,4),(0.,0.254009728749196,0.418442342538795,
0.493905238364453,0.564534945839301,0.57155867891054,0.760590804709951,
0.95211848692074,1.),.UNSPECIFIED.);
#4764=B_SPLINE_CURVE_WITH_KNOTS('',3,(#37005,#37006,#37007,#37008,#37009),
 .UNSPECIFIED.,.F.,.F.,(4,1,4),(0.,0.5,1.),.UNSPECIFIED.);
#4765=B_SPLINE_CURVE_WITH_KNOTS('',3,(#37127,#37128,#37129,#37130,#37131,
#37132,#37133,#37134,#37135,#37136,#37137,#37138,#37139,#37140,#37141,#37142,
#37143,#37144,#37145,#37146,#37147,#37148,#37149,#37150,#37151,#37152,#37153,
#37154,#37155,#37156,#37157,#37158,#37159,#37160,#37161,#37162,#37163,#37164,
#37165,#37166,#37167,#37168,#37169),.UNSPECIFIED.,.F.,.F.,(4,3,3,3,3,3,
3,3,3,3,3,3,3,3,4),(0.,0.108223934367221,0.196285303749965,0.25,0.343884893910837,
0.427395081567402,0.5,0.56557869687699,0.638581513201692,0.728633746613145,
0.75,0.832576121932729,0.916288060966364,0.984134765160058,1.),
 .UNSPECIFIED.);
#4766=B_SPLINE_CURVE_WITH_KNOTS('',3,(#37171,#37172,#37173,#37174,#37175,
#37176,#37177,#37178,#37179,#37180,#37181,#37182,#37183,#37184,#37185,#37186,
#37187,#37188,#37189,#37190,#37191,#37192,#37193,#37194,#37195,#37196,#37197,
#37198,#37199,#37200,#37201,#37202,#37203,#37204,#37205,#37206,#37207,#37208,
#37209,#37210,#37211,#37212,#37213,#37214,#37215,#37216),.UNSPECIFIED.,
 .F.,.F.,(4,3,3,3,3,3,3,3,3,3,3,3,3,3,3,4),(0.5,0.547961489874131,0.590161816450858,
0.625395884296633,0.641391589394501,0.685044958162448,0.73606642855639,
0.749639469465303,0.774100642568663,0.809885260805061,0.84703005897182,
0.883298298999573,0.90012530274043,0.939905998953442,0.972887785392089,
1.),.UNSPECIFIED.);
#4767=B_SPLINE_CURVE_WITH_KNOTS('',3,(#37217,#37218,#37219,#37220,#37221,
#37222),.UNSPECIFIED.,.F.,.F.,(4,1,1,4),(0.,0.333333333333333,0.666666666666667,
1.),.UNSPECIFIED.);
#4768=B_SPLINE_CURVE_WITH_KNOTS('',3,(#37303,#37304,#37305,#37306,#37307,
#37308,#37309),.UNSPECIFIED.,.F.,.F.,(4,1,1,1,4),(0.,0.25,0.5,0.75,1.),
 .UNSPECIFIED.);
#4769=B_SPLINE_CURVE_WITH_KNOTS('',3,(#37312,#37313,#37314,#37315,#37316,
#37317),.UNSPECIFIED.,.F.,.F.,(4,1,1,4),(0.,0.333333333333333,0.666666666666667,
1.),.UNSPECIFIED.);
#4770=B_SPLINE_CURVE_WITH_KNOTS('',3,(#37392,#37393,#37394,#37395,#37396,
#37397,#37398),.UNSPECIFIED.,.F.,.F.,(4,1,1,1,4),(0.,0.25,0.5,0.75,1.),
 .UNSPECIFIED.);
#4771=B_SPLINE_CURVE_WITH_KNOTS('',3,(#37401,#37402,#37403,#37404,#37405,
#37406),.UNSPECIFIED.,.F.,.F.,(4,1,1,4),(0.,0.333333333333333,0.666666666666667,
1.),.UNSPECIFIED.);
#4772=B_SPLINE_CURVE_WITH_KNOTS('',3,(#37485,#37486,#37487,#37488,#37489,
#37490,#37491),.UNSPECIFIED.,.F.,.F.,(4,1,1,1,4),(0.,0.25,0.5,0.75,1.),
 .UNSPECIFIED.);
#4773=B_SPLINE_CURVE_WITH_KNOTS('',3,(#37493,#37494,#37495,#37496,#37497,
#37498,#37499,#37500,#37501,#37502,#37503,#37504,#37505,#37506,#37507,#37508,
#37509,#37510,#37511,#37512,#37513,#37514,#37515,#37516,#37517,#37518,#37519,
#37520,#37521,#37522,#37523,#37524,#37525,#37526,#37527,#37528,#37529,#37530,
#37531,#37532,#37533,#37534,#37535),.UNSPECIFIED.,.F.,.F.,(4,3,3,3,3,3,
3,3,3,3,3,3,3,3,4),(0.5,0.548529595316225,0.598497487241334,0.625311746379829,
0.640986841664308,0.702035213249189,0.741943579299266,0.77900396124832,
0.814913916468621,0.853782317591099,0.874998324171349,0.899329636427328,
0.934236586701693,0.967118293350846,1.),.UNSPECIFIED.);
#4774=B_SPLINE_CURVE_WITH_KNOTS('',3,(#37536,#37537,#37538,#37539,#37540,
#37541),.UNSPECIFIED.,.F.,.F.,(4,1,1,4),(0.,0.333333333333333,0.666666666666667,
1.),.UNSPECIFIED.);
#4775=B_SPLINE_CURVE_WITH_KNOTS('',3,(#37544,#37545,#37546,#37547,#37548,
#37549,#37550,#37551,#37552,#37553,#37554,#37555,#37556,#37557,#37558,#37559,
#37560,#37561,#37562,#37563,#37564,#37565,#37566,#37567,#37568),
 .UNSPECIFIED.,.F.,.F.,(4,3,3,3,3,3,3,3,4),(0.,0.222760808151557,0.397106240079104,
0.488662269369757,0.550778347551447,0.571451672006652,0.774351087614651,
0.978519893531826,1.),.UNSPECIFIED.);
#4776=B_SPLINE_CURVE_WITH_KNOTS('',3,(#37570,#37571,#37572,#37573,#37574),
 .UNSPECIFIED.,.F.,.F.,(4,1,4),(0.,0.5,1.),.UNSPECIFIED.);
#4777=B_SPLINE_CURVE_WITH_KNOTS('',3,(#37633,#37634,#37635,#37636,#37637,
#37638,#37639,#37640,#37641,#37642,#37643,#37644,#37645,#37646,#37647,#37648,
#37649,#37650,#37651,#37652,#37653,#37654,#37655,#37656,#37657,#37658,#37659,
#37660,#37661,#37662,#37663),.UNSPECIFIED.,.F.,.F.,(4,3,3,3,3,3,3,3,3,3,
4),(0.,0.121832525755599,0.249908129079218,0.288122495082726,0.417065300532353,
0.54183819041301,0.577168509552949,0.699562984257601,0.816229176876675,
0.92486104265584,1.),.UNSPECIFIED.);
#4778=B_SPLINE_CURVE_WITH_KNOTS('',3,(#37666,#37667,#37668,#37669,#37670),
 .UNSPECIFIED.,.F.,.F.,(4,1,4),(0.,0.5,1.),.UNSPECIFIED.);
#4779=B_SPLINE_CURVE_WITH_KNOTS('',3,(#37671,#37672,#37673,#37674,#37675,
#37676,#37677,#37678,#37679,#37680,#37681,#37682,#37683,#37684,#37685,#37686,
#37687,#37688,#37689,#37690,#37691,#37692,#37693,#37694,#37695,#37696,#37697,
#37698,#37699,#37700,#37701),.UNSPECIFIED.,.F.,.F.,(4,3,3,3,3,3,3,3,3,3,
4),(0.,0.122704050898866,0.249670790032174,0.285171531803778,0.407685920681539,
0.427750779392952,0.5,0.662001258145332,0.831000629072666,0.982347112822563,
1.),.UNSPECIFIED.);
#4780=B_SPLINE_CURVE_WITH_KNOTS('',3,(#37705,#37706,#37707,#37708,#37709),
 .UNSPECIFIED.,.F.,.F.,(4,1,4),(1.49740942481593E-10,0.5,1.),
 .UNSPECIFIED.);
#4781=B_SPLINE_CURVE_WITH_KNOTS('',3,(#37710,#37711,#37712,#37713,#37714,
#37715,#37716,#37717,#37718,#37719,#37720,#37721,#37722,#37723,#37724,#37725,
#37726,#37727,#37728,#37729,#37730,#37731,#37732,#37733,#37734,#37735,#37736,
#37737,#37738,#37739,#37740),.UNSPECIFIED.,.F.,.F.,(4,3,3,3,3,3,3,3,3,3,
4),(0.,0.153338620238406,0.313880359618386,0.472572662746128,0.5,0.572360230388812,
0.696057644516256,0.714941884577589,0.843940514949318,0.969231024946652,
0.999999994144854),.UNSPECIFIED.);
#4782=B_SPLINE_CURVE_WITH_KNOTS('',3,(#37781,#37782,#37783,#37784,#37785),
 .UNSPECIFIED.,.F.,.F.,(4,1,4),(0.,0.5,1.),.UNSPECIFIED.);
#4783=B_SPLINE_CURVE_WITH_KNOTS('',3,(#37787,#37788,#37789,#37790,#37791),
 .UNSPECIFIED.,.F.,.F.,(4,1,4),(0.,0.5,1.),.UNSPECIFIED.);
#4784=B_SPLINE_CURVE_WITH_KNOTS('',3,(#37840,#37841,#37842,#37843,#37844,
#37845,#37846,#37847,#37848,#37849,#37850,#37851,#37852,#37853),
 .UNSPECIFIED.,.F.,.F.,(4,2,2,2,2,2,4),(-0.000447307985989474,0.,0.032914284663548,
0.0687596055093752,0.109303285607382,0.13313074531524,0.16804094801872),
 .UNSPECIFIED.);
#4785=B_SPLINE_CURVE_WITH_KNOTS('',3,(#37884,#37885,#37886,#37887,#37888,
#37889,#37890,#37891,#37892,#37893,#37894,#37895,#37896,#37897,#37898,#37899),
 .UNSPECIFIED.,.F.,.F.,(4,3,3,3,3,4),(0.,0.356590967262715,0.428567990736464,
0.5,0.880711721467437,0.999999999653582),.UNSPECIFIED.);
#4786=B_SPLINE_CURVE_WITH_KNOTS('',3,(#37923,#37924,#37925,#37926,#37927,
#37928,#37929,#37930,#37931,#37932,#37933,#37934,#37935,#37936,#37937,#37938,
#37939,#37940,#37941,#37942,#37943,#37944,#37945,#37946,#37947,#37948,#37949,
#37950,#37951,#37952,#37953,#37954,#37955,#37956,#37957,#37958,#37959,#37960,
#37961,#37962),.UNSPECIFIED.,.F.,.F.,(4,3,3,3,3,3,3,3,3,3,3,3,3,4),(0.,
0.0683076621317135,0.136385052290451,0.204743464821333,0.273617832595454,
0.342303042999504,0.409931628275985,0.431036207124604,0.5,0.594507367969506,
0.695880525966533,0.798266409514953,0.899133204736282,0.999999999957611),
 .UNSPECIFIED.);
#4787=B_SPLINE_CURVE_WITH_KNOTS('',3,(#38015,#38016,#38017,#38018,#38019,
#38020,#38021,#38022,#38023,#38024,#38025,#38026,#38027,#38028),
 .UNSPECIFIED.,.F.,.F.,(4,2,2,2,2,2,4),(0.,0.0103308875599712,0.0169362990343816,
0.0256187798577227,0.0313960606037984,0.0360467164502027,0.0361100161993619),
 .UNSPECIFIED.);
#4788=B_SPLINE_CURVE_WITH_KNOTS('',3,(#38029,#38030,#38031,#38032,#38033),
 .UNSPECIFIED.,.F.,.F.,(4,1,4),(0.,0.5,1.),.UNSPECIFIED.);
#4789=B_SPLINE_CURVE_WITH_KNOTS('',3,(#38035,#38036,#38037,#38038,#38039),
 .UNSPECIFIED.,.F.,.F.,(4,1,4),(0.,0.5,1.),.UNSPECIFIED.);
#4790=B_SPLINE_CURVE_WITH_KNOTS('',3,(#38080,#38081,#38082,#38083,#38084),
 .UNSPECIFIED.,.F.,.F.,(4,1,4),(0.,0.5,1.),.UNSPECIFIED.);
#4791=B_SPLINE_CURVE_WITH_KNOTS('',3,(#38087,#38088,#38089,#38090,#38091,
#38092,#38093,#38094,#38095,#38096,#38097,#38098,#38099,#38100,#38101,#38102,
#38103,#38104,#38105,#38106,#38107,#38108,#38109,#38110,#38111,#38112,#38113,
#38114,#38115,#38116,#38117,#38118,#38119,#38120,#38121,#38122,#38123,#38124,
#38125,#38126,#38127,#38128,#38129,#38130,#38131,#38132,#38133,#38134,#38135,
#38136,#38137,#38138,#38139,#38140,#38141,#38142,#38143,#38144,#38145,#38146,
#38147,#38148,#38149,#38150,#38151,#38152,#38153,#38154,#38155,#38156,#38157,
#38158,#38159),.UNSPECIFIED.,.F.,.F.,(4,3,3,3,3,3,3,3,3,3,3,3,3,3,3,3,3,
3,3,3,3,3,3,3,4),(0.,0.0580647411456313,0.115658780652467,0.172290921170937,
0.226838289538177,0.25,0.290055360085561,0.328782242072179,0.367790562695241,
0.407608675602096,0.44817880392232,0.49066875410617,0.5,0.531846982158653,
0.565311838656383,0.598776695154113,0.625,0.671875,0.716681036497973,0.752095906935727,
0.80751937049879,0.859606202919486,0.91000978820878,0.957919805830647,1.),
 .UNSPECIFIED.);
#4792=B_SPLINE_CURVE_WITH_KNOTS('',3,(#38191,#38192,#38193,#38194,#38195,
#38196,#38197,#38198,#38199,#38200,#38201,#38202,#38203,#38204,#38205,#38206),
 .UNSPECIFIED.,.F.,.F.,(4,3,3,3,3,4),(0.,0.377456997604758,0.428567841850665,
0.5,0.862866531432866,0.999999950163882),.UNSPECIFIED.);
#4793=B_SPLINE_CURVE_WITH_KNOTS('',3,(#38207,#38208,#38209,#38210,#38211,
#38212,#38213,#38214,#38215,#38216,#38217,#38218,#38219,#38220,#38221,#38222,
#38223,#38224,#38225,#38226,#38227,#38228,#38229,#38230,#38231,#38232,#38233,
#38234,#38235,#38236,#38237,#38238,#38239,#38240,#38241,#38242,#38243,#38244,
#38245,#38246,#38247,#38248,#38249,#38250,#38251,#38252,#38253,#38254,#38255,
#38256,#38257,#38258,#38259,#38260,#38261,#38262,#38263,#38264,#38265,#38266,
#38267,#38268,#38269,#38270,#38271,#38272,#38273,#38274,#38275,#38276,#38277,
#38278,#38279,#38280,#38281,#38282,#38283,#38284,#38285,#38286,#38287,#38288,
#38289,#38290,#38291),.UNSPECIFIED.,.F.,.F.,(4,3,3,3,3,3,3,3,3,3,3,3,3,
3,3,3,3,3,3,3,3,3,3,3,3,3,3,3,4),(0.,0.046875,0.0951417667199228,0.145341424817032,
0.197615177863888,0.241961383397916,0.264606836691461,0.304752197419569,
0.347158775993135,0.375,0.403833812476664,0.4065315732327,0.435962676147329,
0.464976608953125,0.492485183129587,0.5,0.53125,0.559908900624552,0.588131972858992,
0.616317054040882,0.625,0.665912129960532,0.706824259921064,0.747606759945479,
0.75,0.819492698106567,0.888616233634274,0.956624915836391,1.),
 .UNSPECIFIED.);
#4794=B_SPLINE_CURVE_WITH_KNOTS('',3,(#38316,#38317,#38318,#38319,#38320),
 .UNSPECIFIED.,.F.,.F.,(4,1,4),(-1.38548790646885,-1.32652232234896,-0.660412352324733),
 .UNSPECIFIED.);
#4795=B_SPLINE_CURVE_WITH_KNOTS('',3,(#38324,#38325,#38326,#38327,#38328),
 .UNSPECIFIED.,.F.,.F.,(4,1,4),(0.0174473183869231,0.683168321990346,1.57079632679491),
 .UNSPECIFIED.);
#4796=B_SPLINE_CURVE_WITH_KNOTS('',3,(#38332,#38333,#38334,#38335,#38336),
 .UNSPECIFIED.,.F.,.F.,(4,1,4),(-1.57079632679493,-0.905075323191498,-0.017447318386923),
 .UNSPECIFIED.);
#4797=B_SPLINE_CURVE_WITH_KNOTS('',3,(#38339,#38340,#38341,#38342,#38343),
 .UNSPECIFIED.,.F.,.F.,(4,1,4),(0.,0.5,1.),.UNSPECIFIED.);
#4798=B_SPLINE_CURVE_WITH_KNOTS('',3,(#38474,#38475,#38476,#38477,#38478),
 .UNSPECIFIED.,.F.,.F.,(4,1,4),(0.,0.5,1.),.UNSPECIFIED.);
#4799=B_SPLINE_CURVE_WITH_KNOTS('',3,(#38488,#38489,#38490,#38491,#38492,
#38493,#38494,#38495,#38496,#38497,#38498,#38499,#38500,#38501,#38502,#38503,
#38504,#38505,#38506,#38507,#38508,#38509,#38510,#38511,#38512,#38513,#38514,
#38515,#38516,#38517,#38518,#38519,#38520,#38521,#38522,#38523,#38524),
 .UNSPECIFIED.,.F.,.F.,(4,3,3,3,3,3,3,3,3,3,3,3,4),(0.,0.115038203907966,
0.231342060348373,0.343436901863202,0.428175282207932,0.5,0.581335898994594,
0.663952090312432,0.747964067734324,0.826881531499533,0.903269217437867,
0.975977170173621,1.),.UNSPECIFIED.);
#4800=B_SPLINE_CURVE_WITH_KNOTS('',3,(#38528,#38529,#38530,#38531,#38532),
 .UNSPECIFIED.,.F.,.F.,(4,1,4),(2.30914557585832E-8,0.5,0.999999999874125),
 .UNSPECIFIED.);
#4801=B_SPLINE_CURVE_WITH_KNOTS('',3,(#38552,#38553,#38554,#38555,#38556,
#38557,#38558,#38559,#38560,#38561,#38562,#38563,#38564,#38565,#38566,#38567,
#38568,#38569,#38570,#38571,#38572,#38573,#38574,#38575,#38576,#38577,#38578,
#38579,#38580,#38581,#38582,#38583,#38584,#38585,#38586,#38587,#38588,#38589,
#38590,#38591,#38592,#38593,#38594,#38595,#38596,#38597,#38598,#38599,#38600,
#38601,#38602,#38603,#38604,#38605,#38606,#38607,#38608,#38609,#38610,#38611,
#38612,#38613,#38614,#38615,#38616,#38617,#38618,#38619,#38620,#38621,#38622,
#38623,#38624,#38625,#38626,#38627,#38628,#38629,#38630,#38631,#38632,#38633,
#38634,#38635,#38636,#38637,#38638,#38639,#38640,#38641,#38642,#38643,#38644,
#38645,#38646,#38647,#38648,#38649,#38650,#38651,#38652,#38653,#38654,#38655,
#38656,#38657,#38658,#38659,#38660,#38661,#38662,#38663,#38664,#38665,#38666,
#38667,#38668,#38669,#38670,#38671,#38672,#38673,#38674,#38675,#38676,#38677,
#38678),.UNSPECIFIED.,.F.,.F.,(4,3,3,3,3,3,3,3,3,3,3,3,3,3,3,3,3,3,3,3,
3,3,3,3,3,3,3,3,3,3,3,3,3,3,3,3,3,3,3,3,3,3,4),(1.08714226991817E-6,0.0253496018143579,
0.0512847298992085,0.07817249741655,0.105708028837327,0.133936834324744,
0.16335701067037,0.193495462294929,0.224891263378402,0.250000644995257,
0.251853725134846,0.280937968679328,0.310482556475152,0.340346421137526,
0.370726629632326,0.375000472369721,0.399672074955228,0.425347798878008,
0.451407443988746,0.477686162659872,0.500000299744184,0.526473737389026,
0.552474290018567,0.577561642442384,0.591628059960036,0.617381408985307,
0.625000127118648,0.657081828444942,0.687644677042727,0.717829668361996,
0.739138404739344,0.748827631884746,0.758570272142986,0.78934113853949,
0.818315731683725,0.846804172744979,0.874643969631406,0.881653737729003,
0.909632933963951,0.936804973021768,0.963541320340263,0.98967754037982,
0.999999578812091),.UNSPECIFIED.);
#4802=B_SPLINE_CURVE_WITH_KNOTS('',3,(#38687,#38688,#38689,#38690,#38691,
#38692,#38693,#38694,#38695,#38696,#38697,#38698,#38699,#38700,#38701,#38702,
#38703,#38704,#38705,#38706,#38707,#38708,#38709,#38710,#38711,#38712,#38713,
#38714,#38715,#38716,#38717,#38718,#38719,#38720,#38721,#38722,#38723,#38724,
#38725,#38726,#38727,#38728,#38729,#38730,#38731,#38732,#38733,#38734,#38735,
#38736,#38737,#38738,#38739,#38740,#38741,#38742,#38743,#38744,#38745,#38746,
#38747,#38748,#38749,#38750,#38751,#38752,#38753,#38754,#38755,#38756,#38757,
#38758,#38759,#38760,#38761,#38762,#38763,#38764,#38765,#38766,#38767,#38768,
#38769,#38770,#38771,#38772,#38773,#38774,#38775,#38776,#38777,#38778,#38779,
#38780,#38781,#38782,#38783,#38784,#38785,#38786,#38787,#38788,#38789,#38790,
#38791,#38792,#38793,#38794,#38795,#38796,#38797,#38798,#38799,#38800,#38801,
#38802,#38803,#38804,#38805,#38806,#38807,#38808,#38809,#38810,#38811,#38812,
#38813),.UNSPECIFIED.,.F.,.F.,(4,3,3,3,3,3,3,3,3,3,3,3,3,3,3,3,3,3,3,3,
3,3,3,3,3,3,3,3,3,3,3,3,3,3,3,3,3,3,3,3,3,3,4),(1.08714267230527E-6,0.0253478389412002,
0.0512812533490177,0.0781674214633726,0.10570142205911,0.13392877581348,
0.163347701239898,0.193485004905583,0.224879957215179,0.250000644995332,
0.251857190193184,0.280943532715638,0.31048994747757,0.340355500368149,
0.370737175542067,0.375000472369657,0.399672536576085,0.425348644193664,
0.451408625038642,0.477687606091018,0.500000299743983,0.526473668399681,
0.552474148191631,0.577561396697258,0.591632438739668,0.617385625313508,
0.625000127118309,0.65708188985407,0.687644282991676,0.717828861767383,
0.739135381092484,0.748816507352152,0.758568249121014,0.78933974409186,
0.81831441327683,0.846803000429105,0.874643027033626,0.8816542290044,0.909633679863668,
0.936806076234986,0.963542831363689,0.989679538125493,0.9999995788086),
 .UNSPECIFIED.);
#4803=B_SPLINE_CURVE_WITH_KNOTS('',3,(#38834,#38835,#38836,#38837,#38838,
#38839,#38840,#38841,#38842,#38843,#38844,#38845,#38846,#38847,#38848,#38849,
#38850,#38851,#38852,#38853,#38854,#38855,#38856,#38857,#38858,#38859,#38860,
#38861,#38862,#38863,#38864,#38865,#38866,#38867,#38868,#38869,#38870,#38871,
#38872,#38873,#38874,#38875,#38876),.UNSPECIFIED.,.F.,.F.,(4,3,3,3,3,3,
3,3,3,3,3,3,3,3,4),(0.,0.0368913268727967,0.076198038736098,0.119167016455369,
0.169092204069935,0.216272726567888,0.218863755763722,0.25000549280864,
0.263232719607572,0.303098623176135,0.345222468307393,0.395387158869038,
0.44903052361597,0.49540877655782,0.5),.UNSPECIFIED.);
#4804=B_SPLINE_CURVE_WITH_KNOTS('',3,(#38878,#38879,#38880,#38881,#38882,
#38883,#38884,#38885,#38886,#38887,#38888,#38889,#38890,#38891,#38892,#38893,
#38894,#38895,#38896,#38897,#38898,#38899,#38900,#38901,#38902,#38903,#38904,
#38905,#38906,#38907,#38908,#38909,#38910,#38911,#38912,#38913,#38914,#38915,
#38916,#38917,#38918,#38919,#38920),.UNSPECIFIED.,.F.,.F.,(4,3,3,3,3,3,
3,3,3,3,3,3,3,3,4),(0.5,0.54023144044355,0.575907930763391,0.616907828396507,
0.665544743765158,0.707351650794513,0.741976468152102,0.775467219069374,
0.806644744625208,0.841768598836817,0.88183266491269,0.913950883313765,
0.943105681993454,0.971552840996727,1.),.UNSPECIFIED.);
#4805=B_SPLINE_CURVE_WITH_KNOTS('',3,(#38927,#38928,#38929,#38930,#38931,
#38932,#38933,#38934,#38935,#38936,#38937,#38938,#38939,#38940,#38941,#38942,
#38943,#38944,#38945,#38946,#38947,#38948,#38949,#38950,#38951,#38952,#38953,
#38954,#38955,#38956,#38957,#38958,#38959,#38960,#38961,#38962,#38963,#38964,
#38965,#38966),.UNSPECIFIED.,.F.,.F.,(4,3,3,3,3,3,3,3,3,3,3,3,3,4),(0.,
0.0284098719480523,0.0590023475385333,0.0917001351016907,0.127782382300703,
0.171359932009313,0.213975795305512,0.249728820892322,0.283042209140767,
0.320741065391346,0.35662010085617,0.396246461605653,0.450189504718305,
0.499999999999993),.UNSPECIFIED.);
#4806=B_SPLINE_CURVE_WITH_KNOTS('',3,(#38968,#38969,#38970,#38971,#38972,
[truncated: 4,983,575 more chars]
