# Supplementary material for: De novo Powered Air-Purifying Respirator Design and Fabrication for Pandemic Response
Source: medRxiv preprint, doi:10.1101/2021.03.25.21252076, version 1 (2021-03-29)
Supplement: Supplementary Material 4 [file 252076_file05.zip › Supplementary Material 4/CAD Files/Custom Design/Lid.step]

ISO-10303-21;
HEADER;
/* Generated by software containing ST-Developer
 * from STEP Tools, Inc. (www.steptools.com) 
 */

FILE_DESCRIPTION(
/* description */ (''),
/* implementation_level */ '2;1');

FILE_NAME(
/* name */ 'C:/Users/ferro/Desktop/MIT PAPR/PAPR Lid.step',
/* time_stamp */ '2020-10-05T17:05:20-04:00',
/* author */ (''),
/* organization */ (''),
/* preprocessor_version */ 'ST-DEVELOPER v18.1',
/* originating_system */ 'Autodesk Translation Framework v9.3.0.1241',
/* authorisation */ '');

FILE_SCHEMA (('AUTOMOTIVE_DESIGN { 1 0 10303 214 3 1 1 }'));
ENDSEC;

DATA;
#10=MECHANICAL_DESIGN_GEOMETRIC_PRESENTATION_REPRESENTATION('',(#21),#24951);
#11=ITEM_DEFINED_TRANSFORMATION($,$,#9986,#11158);
#12=ITEM_DEFINED_TRANSFORMATION($,$,#9985,#11159);
#13=(
REPRESENTATION_RELATIONSHIP($,$,#24966,#24965)
REPRESENTATION_RELATIONSHIP_WITH_TRANSFORMATION(#11)
SHAPE_REPRESENTATION_RELATIONSHIP()
);
#14=(
REPRESENTATION_RELATIONSHIP($,$,#24965,#24964)
REPRESENTATION_RELATIONSHIP_WITH_TRANSFORMATION(#12)
SHAPE_REPRESENTATION_RELATIONSHIP()
);
#15=CONTEXT_DEPENDENT_SHAPE_REPRESENTATION(#13,#24962);
#16=CONTEXT_DEPENDENT_SHAPE_REPRESENTATION(#14,#24963);
#17=NEXT_ASSEMBLY_USAGE_OCCURRENCE('PAPR lid v3:1','PAPR lid v3:1',
'PAPR lid v3:1',#24969,#24970,'PAPR lid v3:1');
#18=NEXT_ASSEMBLY_USAGE_OCCURRENCE('Case Components:1',
'Case Components:1','Case Components:1',#24968,#24969,
'Case Components:1');
#19=SHAPE_REPRESENTATION_RELATIONSHIP('SRR','None',#24966,#20);
#20=ADVANCED_BREP_SHAPE_REPRESENTATION('',(#22),#24950);
#21=STYLED_ITEM('',(#24984),#22);
#22=MANIFOLD_SOLID_BREP('Body1',#9971);
#23=(
BOUNDED_SURFACE()
B_SPLINE_SURFACE(2,2,((#24012,#24013,#24014),(#24015,#24016,#24017),(#24018,
#24019,#24020)),.UNSPECIFIED.,.F.,.F.,.F.)
B_SPLINE_SURFACE_WITH_KNOTS((3,3),(3,3),(0.0349065851426108,1.57079632695146),
(-3.14159265668799,-1.57079632332173),.UNSPECIFIED.)
GEOMETRIC_REPRESENTATION_ITEM()
RATIONAL_B_SPLINE_SURFACE(((1.,0.707106778863219,1.),(0.719339800319953,
0.508650049112353,0.719339800319953),(1.,0.707106778863219,1.)))
REPRESENTATION_ITEM('')
SURFACE()
);
#24=(
BOUNDED_SURFACE()
B_SPLINE_SURFACE(2,2,((#24866,#24867,#24868),(#24869,#24870,#24871),(#24872,
#24873,#24874)),.UNSPECIFIED.,.F.,.F.,.F.)
B_SPLINE_SURFACE_WITH_KNOTS((3,3),(3,3),(0.0349065852093518,1.5707963270531),
(-4.71238898549507,-3.14159264786505),.UNSPECIFIED.)
GEOMETRIC_REPRESENTATION_ITEM()
RATIONAL_B_SPLINE_SURFACE(((1.,0.707106777355755,1.),(0.719339800307829,
0.508650048019401,0.719339800307829),(1.,0.707106777355755,1.)))
REPRESENTATION_ITEM('')
SURFACE()
);
#25=(
BOUNDED_SURFACE()
B_SPLINE_SURFACE(2,2,((#24880,#24881,#24882),(#24883,#24884,#24885),(#24886,
#24887,#24888)),.UNSPECIFIED.,.F.,.F.,.F.)
B_SPLINE_SURFACE_WITH_KNOTS((3,3),(3,3),(0.0349065844536459,1.57079632641429),
(-1.57079632677204,-2.59894694891126E-11),.UNSPECIFIED.)
GEOMETRIC_REPRESENTATION_ITEM()
RATIONAL_B_SPLINE_SURFACE(((1.,0.707106781203817,1.),(0.719339800267233,
0.50865005075876,0.719339800267233),(1.,0.707106781203817,1.)))
REPRESENTATION_ITEM('')
SURFACE()
);
#26=(
BOUNDED_SURFACE()
B_SPLINE_SURFACE(2,2,((#24889,#24890,#24891),(#24892,#24893,#24894),(#24895,
#24896,#24897)),.UNSPECIFIED.,.F.,.F.,.F.)
B_SPLINE_SURFACE_WITH_KNOTS((3,3),(3,3),(0.0349065847775495,1.57079632662474),
(1.01858041994611E-11,1.5707963267833),.UNSPECIFIED.)
GEOMETRIC_REPRESENTATION_ITEM()
RATIONAL_B_SPLINE_SURFACE(((1.,0.707106781194249,1.),(0.71933980030663,
0.508650050779735,0.71933980030663),(1.,0.707106781194249,1.)))
REPRESENTATION_ITEM('')
SURFACE()
);
#27=(
BOUNDED_SURFACE()
B_SPLINE_SURFACE(2,2,((#24900,#24901,#24902),(#24903,#24904,#24905),(#24906,
#24907,#24908)),.UNSPECIFIED.,.F.,.F.,.F.)
B_SPLINE_SURFACE_WITH_KNOTS((3,3),(3,3),(0.0349065848785534,1.57079632669056),
(6.26604808650952E-12,1.57079632678774),.UNSPECIFIED.)
GEOMETRIC_REPRESENTATION_ITEM()
RATIONAL_B_SPLINE_SURFACE(((1.,0.707106781191294,1.),(0.719339800318854,
0.508650050786253,0.719339800318854),(1.,0.707106781191294,1.)))
REPRESENTATION_ITEM('')
SURFACE()
);
#28=(
BOUNDED_SURFACE()
B_SPLINE_SURFACE(2,2,((#24912,#24913,#24914),(#24915,#24916,#24917),(#24918,
#24919,#24920)),.UNSPECIFIED.,.F.,.F.,.F.)
B_SPLINE_SURFACE_WITH_KNOTS((3,3),(3,3),(0.0349065852045523,1.5707963270438),
(-4.71238898535291,-3.14159264810389),.UNSPECIFIED.)
GEOMETRIC_REPRESENTATION_ITEM()
RATIONAL_B_SPLINE_SURFACE(((1.,0.707106777490456,1.),(0.719339800309396,
0.508650048117405,0.719339800309396),(1.,0.707106777490456,1.)))
REPRESENTATION_ITEM('')
SURFACE()
);
#29=(
BOUNDED_SURFACE()
B_SPLINE_SURFACE(2,2,((#24921,#24922,#24923),(#24924,#24925,#24926),(#24927,
#24928,#24929)),.UNSPECIFIED.,.F.,.F.,.F.)
B_SPLINE_SURFACE_WITH_KNOTS((3,3),(3,3),(0.0349065848757605,1.57079632668842),
(-3.14159265358342,-1.57079632680216),.UNSPECIFIED.)
GEOMETRIC_REPRESENTATION_ITEM()
RATIONAL_B_SPLINE_SURFACE(((1.,0.707106781191369,1.),(0.719339800318628,
0.508650050786147,0.719339800318628),(1.,0.707106781191369,1.)))
REPRESENTATION_ITEM('')
SURFACE()
);
#30=(
BOUNDED_SURFACE()
B_SPLINE_SURFACE(2,2,((#24933,#24934,#24935),(#24936,#24937,#24938),(#24939,
#24940,#24941)),.UNSPECIFIED.,.F.,.F.,.F.)
B_SPLINE_SURFACE_WITH_KNOTS((3,3),(3,3),(0.03490658497059,1.57079632674994),
(-1.57079632679219,-3.08392634811301E-12),.UNSPECIFIED.)
GEOMETRIC_REPRESENTATION_ITEM()
RATIONAL_B_SPLINE_SURFACE(((1.,0.707106781188596,1.),(0.7193398003302,0.508650050792335,
0.7193398003302),(1.,0.707106781188596,1.)))
REPRESENTATION_ITEM('')
SURFACE()
);
#31=CONICAL_SURFACE('',#10940,10.,0.0349065850398866);
#32=CONICAL_SURFACE('',#10943,6.5,0.0349065850398866);
#33=CONICAL_SURFACE('',#10959,16.3432093872499,0.0349065850398936);
#34=CONICAL_SURFACE('',#10977,10.,0.0349065850398866);
#35=CONICAL_SURFACE('',#10983,6.5,0.0349065850398866);
#36=CONICAL_SURFACE('',#10987,6.5,0.0349065850398866);
#37=CONICAL_SURFACE('',#11007,14.0000002086163,0.349065850398866);
#38=CONICAL_SURFACE('',#11019,10.,0.0349065850398866);
#39=CONICAL_SURFACE('',#11036,14.0000002086163,0.349065850398866);
#40=CONICAL_SURFACE('',#11042,16.3432093872499,0.0349065850398936);
#41=CONICAL_SURFACE('',#11081,16.3432093872499,0.0349065850398936);
#42=CONICAL_SURFACE('',#11099,16.3432093872499,0.0349065850398936);
#43=CONICAL_SURFACE('',#11143,6.5,0.0349065850398866);
#44=CONICAL_SURFACE('',#11148,10.,0.0349065850398866);
#45=FACE_BOUND('',#2702,.T.);
#46=FACE_BOUND('',#2703,.T.);
#47=FACE_BOUND('',#3074,.T.);
#48=FACE_BOUND('',#3075,.T.);
#49=FACE_BOUND('',#3087,.T.);
#50=FACE_BOUND('',#3091,.T.);
#51=FACE_BOUND('',#3094,.T.);
#52=FACE_BOUND('',#3113,.T.);
#53=FACE_BOUND('',#3116,.T.);
#54=SPHERICAL_SURFACE('',#10157,1.);
#55=SPHERICAL_SURFACE('',#10176,1.00000000000001);
#56=SPHERICAL_SURFACE('',#10390,1.);
#57=SPHERICAL_SURFACE('',#10406,1.00000000000001);
#58=SPHERICAL_SURFACE('',#10607,1.);
#59=SPHERICAL_SURFACE('',#10626,1.00000000000001);
#60=SPHERICAL_SURFACE('',#10828,1.);
#61=SPHERICAL_SURFACE('',#10844,1.00000000000001);
#62=TOROIDAL_SURFACE('',#10054,2.02880000000002,0.2);
#63=TOROIDAL_SURFACE('',#10080,2.02880000000002,0.2);
#64=TOROIDAL_SURFACE('',#10288,2.02880000000002,0.2);
#65=TOROIDAL_SURFACE('',#10314,2.02880000000002,0.2);
#66=TOROIDAL_SURFACE('',#10504,2.02880000000002,0.2);
#67=TOROIDAL_SURFACE('',#10530,2.02880000000002,0.2);
#68=TOROIDAL_SURFACE('',#10726,2.02880000000002,0.2);
#69=TOROIDAL_SURFACE('',#10752,2.02880000000002,0.2);
#70=TOROIDAL_SURFACE('',#10946,12.7446786974046,0.457200000012143);
#71=TOROIDAL_SURFACE('',#10953,13.6590786984605,0.457200001058969);
#72=TOROIDAL_SURFACE('',#10966,27.238,4.);
#73=TOROIDAL_SURFACE('',#10975,27.238,4.);
#74=TOROIDAL_SURFACE('',#10980,15.273874388908,0.990600000000022);
#75=TOROIDAL_SURFACE('',#11002,22.238,1.);
#76=TOROIDAL_SURFACE('',#11040,22.238,1.);
#77=TOROIDAL_SURFACE('',#11045,15.273874388908,0.990600000000022);
#78=TOROIDAL_SURFACE('',#11049,9.21407869733186,0.45720000006189);
#79=TOROIDAL_SURFACE('',#11054,10.1284786974225,0.457200000004114);
#80=TOROIDAL_SURFACE('',#11056,12.7446786974046,0.457200000012143);
#81=TOROIDAL_SURFACE('',#11061,13.6590786984605,0.457200001058969);
#82=TOROIDAL_SURFACE('',#11084,15.273874388908,0.990600000000022);
#83=TOROIDAL_SURFACE('',#11087,9.21407869733187,0.45720000006189);
#84=TOROIDAL_SURFACE('',#11091,10.1284786974225,0.457200000004114);
#85=TOROIDAL_SURFACE('',#11092,12.7446786974046,0.457200000012143);
#86=TOROIDAL_SURFACE('',#11096,13.6590786984605,0.457200001058969);
#87=TOROIDAL_SURFACE('',#11104,9.21407869733187,0.45720000006189);
#88=TOROIDAL_SURFACE('',#11109,10.1284786974225,0.457200000004114);
#89=TOROIDAL_SURFACE('',#11111,12.7446786974046,0.457200000012143);
#90=TOROIDAL_SURFACE('',#11116,13.6590786984605,0.457200001058969);
#91=TOROIDAL_SURFACE('',#11135,15.2738743889079,0.990600000000022);
#92=TOROIDAL_SURFACE('',#11138,9.21407869733184,0.45720000006189);
#93=TOROIDAL_SURFACE('',#11142,10.1284786974225,0.457200000004114);
#94=B_SPLINE_CURVE_WITH_KNOTS('',3,(#14547,#14548,#14549,#14550,#14551,
#14552,#14553,#14554,#14555,#14556,#14557,#14558,#14559,#14560,#14561,#14562),
 .UNSPECIFIED.,.F.,.F.,(4,3,3,3,3,4),(-0.031520312937802,-0.0312190954677217,
-0.0234361163162939,-0.015620919860276,-0.00780947786580983,0.),
 .UNSPECIFIED.);
#95=B_SPLINE_CURVE_WITH_KNOTS('',3,(#14567,#14568,#14569,#14570,#14571,
#14572,#14573,#14574,#14575,#14576,#14577,#14578,#14579,#14580,#14581,#14582),
 .UNSPECIFIED.,.F.,.F.,(4,3,3,3,3,4),(-0.000301222826647515,0.,0.00778311755804833,
0.0155984529939496,0.023410033901516,0.0312196506454868),.UNSPECIFIED.);
#96=B_SPLINE_CURVE_WITH_KNOTS('',3,(#14684,#14685,#14686,#14687,#14688,
#14689,#14690,#14691,#14692,#14693,#14694,#14695,#14696,#14697,#14698,#14699),
 .UNSPECIFIED.,.F.,.F.,(4,3,3,3,3,4),(-0.0315203129378757,-0.0312190954677947,
-0.023436116316329,-0.0156209198602853,-0.00780947786581242,0.),
 .UNSPECIFIED.);
#97=B_SPLINE_CURVE_WITH_KNOTS('',3,(#14741,#14742,#14743,#14744,#14745,
#14746,#14747,#14748,#14749,#14750,#14751,#14752,#14753,#14754,#14755,#14756),
 .UNSPECIFIED.,.F.,.F.,(4,3,3,3,3,4),(-0.000301222826636611,0.,0.00778311755633199,
0.0155984529901697,0.0234100338956712,0.0312196506375895),.UNSPECIFIED.);
#98=B_SPLINE_CURVE_WITH_KNOTS('',3,(#14821,#14822,#14823,#14824,#14825,
#14826,#14827,#14828,#14829,#14830,#14831,#14832,#14833,#14834,#14835,#14836,
#14837,#14838,#14839,#14840,#14841,#14842),.UNSPECIFIED.,.F.,.F.,(4,2,2,
2,2,2,2,2,2,2,4),(-0.0314877828055528,-0.0313419400201158,-0.0273436171481635,
-0.0234373811477673,-0.019433645242465,-0.0157274895553696,-0.0156233985867064,
-0.0116187741021477,-0.00781124640913577,-0.00381599242989211,0.),
 .UNSPECIFIED.);
#99=B_SPLINE_CURVE_WITH_KNOTS('',3,(#14912,#14913,#14914,#14915,#14916,
#14917,#14918,#14919,#14920,#14921,#14922,#14923,#14924,#14925,#14926,#14927,
#14928,#14929,#14930,#14931,#14932,#14933),.UNSPECIFIED.,.F.,.F.,(4,2,2,
2,2,2,2,2,2,2,4),(-0.000145834397451017,0.,0.00399836169473594,0.00790463084299194,
0.0119084073768402,0.0156145926334523,0.0157186845498575,0.0197233422963252,
0.0235309078565577,0.0275261856136953,0.0313422253865967),.UNSPECIFIED.);
#100=B_SPLINE_CURVE_WITH_KNOTS('',3,(#15071,#15072,#15073,#15074,#15075,
#15076,#15077,#15078,#15079,#15080,#15081,#15082,#15083,#15084,#15085,#15086,
#15087,#15088,#15089,#15090,#15091,#15092),.UNSPECIFIED.,.F.,.F.,(4,2,2,
2,2,2,2,2,2,2,4),(-0.0314877827964005,-0.0313419400092234,-0.0273436347827741,
-0.0234373811477688,-0.019433624689153,-0.0157274895553722,-0.0156233985867091,
-0.0116187541239241,-0.00781124640913739,-0.00381600962895233,0.),
 .UNSPECIFIED.);
#101=B_SPLINE_CURVE_WITH_KNOTS('',3,(#15162,#15163,#15164,#15165,#15166,
#15167,#15168,#15169,#15170,#15171,#15172,#15173,#15174,#15175,#15176,#15177,
#15178,#15179,#15180,#15181,#15182,#15183),.UNSPECIFIED.,.F.,.F.,(4,2,2,
2,2,2,2,2,2,2,4),(-0.000145851955875215,0.,0.00399901545411653,0.007896867751824,
0.0119008614042419,0.0156171005478737,0.0157120964947336,0.0197171046626569,
0.0235236897918428,0.0275189671941982,0.0313334463352194),.UNSPECIFIED.);
#102=B_SPLINE_CURVE_WITH_KNOTS('',3,(#15345,#15346,#15347,#15348),
 .UNSPECIFIED.,.F.,.F.,(4,4),(0.,0.104655564290754),.UNSPECIFIED.);
#103=B_SPLINE_CURVE_WITH_KNOTS('',3,(#15352,#15353,#15354,#15355,#15356,
#15357),.UNSPECIFIED.,.F.,.F.,(4,1,1,4),(0.,0.106045082867467,0.212090165734934,
0.371157790036135),.UNSPECIFIED.);
#104=B_SPLINE_CURVE_WITH_KNOTS('',3,(#15360,#15361,#15362,#15363,#15364),
 .UNSPECIFIED.,.F.,.F.,(4,1,4),(0.108713750506856,0.212090165734934,0.371157790036135),
 .UNSPECIFIED.);
#105=B_SPLINE_CURVE_WITH_KNOTS('',3,(#15373,#15374,#15375,#15376,#15377,
#15378,#15379,#15380,#15381,#15382,#15383,#15384,#15385,#15386,#15387,#15388,
#15389,#15390,#15391,#15392),.UNSPECIFIED.,.F.,.F.,(4,2,2,2,2,2,2,2,2,4),
(0.,0.016046368950918,0.0290654798757627,0.0314022834133001,0.0326930991948659,
0.0336165323873639,0.0341687603043141,0.0347020918979796,0.0356945053377369,
0.0365297785229241),.UNSPECIFIED.);
#106=B_SPLINE_CURVE_WITH_KNOTS('',3,(#15397,#15398,#15399,#15400,#15401,
#15402,#15403,#15404,#15405,#15406,#15407,#15408,#15409,#15410,#15411,#15412,
#15413,#15414,#15415,#15416,#15417,#15418,#15419,#15420),.UNSPECIFIED.,
 .F.,.F.,(4,2,2,2,2,2,2,2,2,2,2,4),(0.117064915669892,0.117375029335321,
0.117640009605815,0.117763898675646,0.117810292247646,0.117895971336356,
0.11803169798928,0.118082293722873,0.118423572852632,0.119086758439872,
0.122691619589491,0.127280553481575),.UNSPECIFIED.);
#107=B_SPLINE_CURVE_WITH_KNOTS('',3,(#15456,#15457,#15458,#15459,#15460),
 .UNSPECIFIED.,.F.,.F.,(4,1,4),(8.39277999693788E-16,0.159071639126486,
0.262450455094606),.UNSPECIFIED.);
#108=B_SPLINE_CURVE_WITH_KNOTS('',3,(#15464,#15465,#15466,#15467,#15468,
#15469),.UNSPECIFIED.,.F.,.F.,(4,1,1,4),(8.39277999693788E-16,0.159071639126486,
0.265119398544143,0.3711671579618),.UNSPECIFIED.);
#109=B_SPLINE_CURVE_WITH_KNOTS('',3,(#15472,#15473,#15474,#15475),
 .UNSPECIFIED.,.F.,.F.,(4,4),(0.266508789847166,0.3711671579618),
 .UNSPECIFIED.);
#110=B_SPLINE_CURVE_WITH_KNOTS('',3,(#15554,#15555,#15556,#15557,#15558,
#15559,#15560,#15561,#15562,#15563,#15564,#15565,#15566,#15567,#15568,#15569,
#15570,#15571,#15572,#15573,#15574,#15575),.UNSPECIFIED.,.F.,.F.,(4,2,2,
2,2,2,2,2,2,2,4),(0.,0.0160463107996268,0.0290733758223772,0.0314019323176852,
0.0326883747705071,0.0330119191219577,0.0334244186347793,0.0336985701142929,
0.0340279167464662,0.0346460944767938,0.034957588543669),.UNSPECIFIED.);
#111=B_SPLINE_CURVE_WITH_KNOTS('',3,(#15579,#15580,#15581,#15582,#15583,
#15584,#15585,#15586,#15587,#15588,#15589,#15590,#15591,#15592,#15593,#15594,
#15595,#15596,#15597,#15598,#15599,#15600),.UNSPECIFIED.,.F.,.F.,(4,2,2,
2,2,2,2,2,2,2,4),(0.10513411646366,0.106032338990568,0.106582298118819,
0.106888557836758,0.107196391243694,0.107694540893618,0.107857087914973,
0.109020252798412,0.111285152036794,0.123554086343505,0.139181786131904),
 .UNSPECIFIED.);
#112=B_SPLINE_CURVE_WITH_KNOTS('',3,(#15640,#15641,#15642,#15643,#15644,
#15645,#15646,#15647,#15648,#15649,#15650,#15651),.UNSPECIFIED.,.F.,.F.,
(4,2,2,2,2,4),(-0.121903032335574,-0.111952936289131,-0.0664118674842664,
-0.0333692916537211,0.,0.000427442126138197),.UNSPECIFIED.);
#113=B_SPLINE_CURVE_WITH_KNOTS('',3,(#15729,#15730,#15731,#15732,#15733,
#15734,#15735,#15736,#15737,#15738,#15739,#15740),.UNSPECIFIED.,.F.,.F.,
(4,2,2,2,2,4),(-0.126642601260852,-0.126200087217464,-0.0916537072293236,
-0.0574456358030506,-0.0102990052677911,0.),.UNSPECIFIED.);
#114=B_SPLINE_CURVE_WITH_KNOTS('',3,(#15861,#15862,#15863,#15864,#15865,
#15866,#15867,#15868,#15869,#15870,#15871,#15872,#15873,#15874,#15875,#15876,
#15877,#15878,#15879,#15880,#15881,#15882,#15883,#15884,#15885,#15886,#15887,
#15888,#15889,#15890,#15891,#15892,#15893,#15894,#15895,#15896,#15897,#15898,
#15899,#15900),.UNSPECIFIED.,.F.,.F.,(4,3,3,3,3,3,3,3,3,3,3,3,3,4),(-1.53588974175501,
-1.40839677220498,-1.27571039941444,-1.14822200885335,-1.02069981595341,
-0.893031357480879,-0.877651281042794,-0.746407865879974,-0.615279510707187,
-0.484238037650047,-0.353225378746467,-0.222251565400532,-0.0912370298638008,
-9.31751895620802E-11),.UNSPECIFIED.);
#115=B_SPLINE_CURVE_WITH_KNOTS('',3,(#15937,#15938,#15939,#15940,#15941,
#15942,#15943,#15944,#15945,#15946,#15947,#15948,#15949,#15950,#15951,#15952,
#15953,#15954,#15955,#15956,#15957,#15958,#15959,#15960,#15961,#15962,#15963,
#15964,#15965,#15966,#15967,#15968,#15969,#15970,#15971,#15972,#15973,#15974,
#15975,#15976),.UNSPECIFIED.,.F.,.F.,(4,3,3,3,3,3,3,3,3,3,3,3,3,4),(9.31931255557592E-11,
0.131003040902791,0.261971184792504,0.392932450241529,0.523987282432479,
0.655071930211864,0.786305349542463,0.877651281042812,1.00529632978368,
1.13794468277652,1.26539359419919,1.39281043875361,1.52028312880583,1.53588974175503),
 .UNSPECIFIED.);
#116=B_SPLINE_CURVE_WITH_KNOTS('',3,(#16148,#16149,#16150,#16151,#16152,
#16153,#16154,#16155,#16156,#16157,#16158,#16159,#16160,#16161,#16162,#16163,
#16164),.UNSPECIFIED.,.F.,.F.,(4,1,1,1,1,1,1,1,1,1,1,1,1,1,4),(-13.1182782491747,
-12.2226551140019,-11.2856223227726,-10.0362452678003,-9.41155674031419,
-8.16217968534189,-7.53749115785574,-6.28811410288345,-5.6634255753973,
-5.03873704791115,-3.78935999293885,-2.85232720170963,-1.91529441048041,
-0.978261619251188,-0.0414068145744587),.UNSPECIFIED.);
#117=B_SPLINE_CURVE_WITH_KNOTS('',3,(#16165,#16166,#16167,#16168,#16169,
#16170,#16171,#16172),.UNSPECIFIED.,.F.,.F.,(4,1,1,1,1,4),(-0.14229069782028,
-0.116478175080985,-0.0859323636621443,-0.0452046151036898,-0.0248407408244626,
-0.00473469962732719),.UNSPECIFIED.);
#118=B_SPLINE_CURVE_WITH_KNOTS('',3,(#16175,#16176,#16177,#16178,#16179,
#16180,#16181,#16182,#16183,#16184,#16185,#16186,#16187,#16188,#16189,#16190,
#16191),.UNSPECIFIED.,.F.,.F.,(4,1,1,1,1,1,1,1,1,1,1,1,1,1,4),(-13.1182795441557,
-12.222655114002,-11.2856223227729,-10.3485895315438,-9.41155674031476,
-8.16217968534266,-7.5374911578566,-6.2881141028845,-5.66342557539844,-5.03873704791239,
-3.78935999294029,-3.16467146545423,-1.91529441048213,-0.978261619253048,
-0.0414068145769346),.UNSPECIFIED.);
#119=B_SPLINE_CURVE_WITH_KNOTS('',3,(#16192,#16193,#16194,#16195,#16196,
#16197,#16198,#16199,#16200),.UNSPECIFIED.,.F.,.F.,(4,1,1,1,1,1,4),(-0.142290697820013,
-0.126660112220699,-0.106296237941524,-0.0655684893831757,-0.0350226779644142,
-0.024840740824827,-0.00473405300886651),.UNSPECIFIED.);
#120=B_SPLINE_CURVE_WITH_KNOTS('',3,(#16210,#16211,#16212,#16213,#16214),
 .UNSPECIFIED.,.F.,.F.,(4,1,4),(8.39277999693788E-16,0.159071639126486,
0.262449605837562),.UNSPECIFIED.);
#121=B_SPLINE_CURVE_WITH_KNOTS('',3,(#16218,#16219,#16220,#16221),
 .UNSPECIFIED.,.F.,.F.,(4,4),(0.266507935975443,0.3711671579618),
 .UNSPECIFIED.);
#122=B_SPLINE_CURVE_WITH_KNOTS('',3,(#16225,#16226,#16227,#16228),
 .UNSPECIFIED.,.F.,.F.,(4,4),(0.,0.104656253637528),.UNSPECIFIED.);
#123=B_SPLINE_CURVE_WITH_KNOTS('',3,(#16232,#16233,#16234,#16235,#16236),
 .UNSPECIFIED.,.F.,.F.,(4,1,4),(0.108714436424427,0.212090165734934,0.371157790036135),
 .UNSPECIFIED.);
#124=B_SPLINE_CURVE_WITH_KNOTS('',3,(#16295,#16296,#16297,#16298,#16299,
#16300,#16301,#16302,#16303,#16304,#16305,#16306,#16307,#16308,#16309,#16310,
#16311,#16312,#16313,#16314,#16315,#16316,#16317,#16318,#16319,#16320,#16321,
#16322,#16323,#16324,#16325,#16326,#16327,#16328,#16329,#16330,#16331,#16332,
#16333,#16334),.UNSPECIFIED.,.F.,.F.,(4,3,3,3,3,3,3,3,3,3,3,3,3,4),(9.31931255557592E-11,
0.131038822075379,0.262043141571315,0.393040652997659,0.524131030681632,
0.655250664354811,0.786517415862245,0.877651281042812,1.00535682000886,
1.1379900504454,1.26550095557258,1.3929799971671,1.52051461210621,1.53588974175503),
 .UNSPECIFIED.);
#125=B_SPLINE_CURVE_WITH_KNOTS('',3,(#16342,#16343,#16344,#16345,#16346,
#16347,#16348,#16349,#16350,#16351,#16352,#16353),.UNSPECIFIED.,.F.,.F.,
(4,2,2,2,2,4),(-0.121882860124468,-0.111940309934345,-0.0664059740509862,
-0.0333664415822112,0.,0.000427391147136429),.UNSPECIFIED.);
#126=B_SPLINE_CURVE_WITH_KNOTS('',3,(#16366,#16367,#16368,#16369,#16370,
#16371,#16372,#16373,#16374,#16375,#16376,#16377),.UNSPECIFIED.,.F.,.F.,
(4,2,2,2,2,4),(-0.126638328275473,-0.126195826675246,-0.0916483634731726,
-0.0574394164745264,-0.0102937083447564,0.),.UNSPECIFIED.);
#127=B_SPLINE_CURVE_WITH_KNOTS('',3,(#16394,#16395,#16396,#16397,#16398,
#16399,#16400,#16401,#16402,#16403,#16404,#16405,#16406,#16407,#16408,#16409),
 .UNSPECIFIED.,.F.,.F.,(4,3,3,3,3,4),(-0.031520312937802,-0.0312190954677217,
-0.0234361163162939,-0.015620919860276,-0.00780947786580983,0.),
 .UNSPECIFIED.);
#128=B_SPLINE_CURVE_WITH_KNOTS('',3,(#16414,#16415,#16416,#16417,#16418,
#16419,#16420,#16421,#16422,#16423,#16424,#16425,#16426,#16427,#16428,#16429),
 .UNSPECIFIED.,.F.,.F.,(4,3,3,3,3,4),(-0.000301222826657294,0.,0.00778311755804833,
0.0155984529939496,0.023410033901516,0.0312196506454868),.UNSPECIFIED.);
#129=B_SPLINE_CURVE_WITH_KNOTS('',3,(#16531,#16532,#16533,#16534,#16535,
#16536,#16537,#16538,#16539,#16540,#16541,#16542,#16543,#16544,#16545,#16546),
 .UNSPECIFIED.,.F.,.F.,(4,3,3,3,3,4),(-0.0315203129378757,-0.0312190954677947,
-0.023436116316329,-0.0156209198602853,-0.00780947786581242,0.),
 .UNSPECIFIED.);
#130=B_SPLINE_CURVE_WITH_KNOTS('',3,(#16588,#16589,#16590,#16591,#16592,
#16593,#16594,#16595,#16596,#16597,#16598,#16599,#16600,#16601,#16602,#16603),
 .UNSPECIFIED.,.F.,.F.,(4,3,3,3,3,4),(-0.000301222826646376,0.,0.00778311755633199,
0.0155984529901697,0.0234100338956712,0.0312196506375895),.UNSPECIFIED.);
#131=B_SPLINE_CURVE_WITH_KNOTS('',3,(#16668,#16669,#16670,#16671,#16672,
#16673,#16674,#16675,#16676,#16677,#16678,#16679,#16680,#16681,#16682,#16683,
#16684,#16685,#16686,#16687,#16688,#16689),.UNSPECIFIED.,.F.,.F.,(4,2,2,
2,2,2,2,2,2,2,4),(-0.0314877828055528,-0.0313419400201158,-0.0273437825749048,
-0.0234373811477673,-0.0194334402070186,-0.0157274895553696,-0.0156233985867064,
-0.0116185747924036,-0.00781124640913577,-0.0038161639661528,0.),
 .UNSPECIFIED.);
#132=B_SPLINE_CURVE_WITH_KNOTS('',3,(#16759,#16760,#16761,#16762,#16763,
#16764,#16765,#16766,#16767,#16768,#16769,#16770,#16771,#16772,#16773,#16774,
#16775,#16776,#16777,#16778,#16779,#16780),.UNSPECIFIED.,.F.,.F.,(4,2,2,
2,2,2,2,2,2,2,4),(-0.000145833945357204,0.,0.00399819636535293,0.00790463084299194,
0.0119086125147736,0.0156145926334523,0.0157186845498575,0.0197235415315915,
0.0235309078565577,0.0275260138100061,0.0313422253865967),.UNSPECIFIED.);
#133=B_SPLINE_CURVE_WITH_KNOTS('',3,(#16918,#16919,#16920,#16921,#16922,
#16923,#16924,#16925,#16926,#16927,#16928,#16929,#16930,#16931,#16932,#16933,
#16934,#16935,#16936,#16937,#16938,#16939),.UNSPECIFIED.,.F.,.F.,(4,2,2,
2,2,2,2,2,2,2,4),(-0.0314877827964005,-0.0313419400092234,-0.0273437898225952,
-0.0234373811477688,-0.0194334325221484,-0.0157274895553722,-0.0156233985867091,
-0.0116185673224751,-0.00781124640913739,-0.0038161703931505,0.),
 .UNSPECIFIED.);
#134=B_SPLINE_CURVE_WITH_KNOTS('',3,(#17009,#17010,#17011,#17012,#17013,
#17014,#17015,#17016,#17017,#17018,#17019,#17020,#17021,#17022,#17023,#17024,
#17025,#17026,#17027,#17028,#17029,#17030),.UNSPECIFIED.,.F.,.F.,(4,2,2,
2,2,2,2,2,2,2,4),(-0.000145851103860018,0.,0.00399886050560489,0.007896867751824,
0.0119010547568189,0.0156171005478737,0.0157120964947336,0.0197172908268375,
0.0235236897918428,0.02751880596896,0.0313334463352194),.UNSPECIFIED.);
#135=B_SPLINE_CURVE_WITH_KNOTS('',3,(#17191,#17192,#17193,#17194,#17195,
#17196),.UNSPECIFIED.,.F.,.F.,(4,1,1,4),(0.,0.106045082867467,0.212090165734934,
0.371157790036135),.UNSPECIFIED.);
#136=B_SPLINE_CURVE_WITH_KNOTS('',3,(#17206,#17207,#17208,#17209,#17210,
#17211,#17212,#17213,#17214,#17215,#17216,#17217,#17218,#17219,#17220,#17221,
#17222,#17223,#17224,#17225),.UNSPECIFIED.,.F.,.F.,(4,2,2,2,2,2,2,2,2,4),
(0.,0.0160464968432571,0.0290703744317268,0.0314060103141908,0.0327007476203154,
0.0335472258869782,0.0340711519743796,0.0345790736064019,0.035471908952427,
0.0361947504705715),.UNSPECIFIED.);
#137=B_SPLINE_CURVE_WITH_KNOTS('',3,(#17230,#17231,#17232,#17233,#17234,
#17235,#17236,#17237,#17238,#17239,#17240,#17241,#17242,#17243,#17244,#17245,
#17246,#17247,#17248,#17249,#17250,#17251),.UNSPECIFIED.,.F.,.F.,(4,2,2,
2,2,2,2,2,2,2,4),(0.11006845350568,0.110976367307927,0.111474204156809,
0.111756313639414,0.11204601045269,0.112465392377954,0.1126720299051,0.11391932106873,
0.116342602625519,0.129401036598385,0.146047746502563),.UNSPECIFIED.);
#138=B_SPLINE_CURVE_WITH_KNOTS('',3,(#17286,#17287,#17288,#17289,#17290,
#17291),.UNSPECIFIED.,.F.,.F.,(4,1,1,4),(8.39277999693788E-16,0.159071639126486,
0.265119398544143,0.3711671579618),.UNSPECIFIED.);
#139=B_SPLINE_CURVE_WITH_KNOTS('',3,(#17364,#17365,#17366,#17367,#17368,
#17369,#17370,#17371,#17372,#17373,#17374,#17375,#17376,#17377,#17378,#17379,
#17380,#17381,#17382,#17383),.UNSPECIFIED.,.F.,.F.,(4,2,2,2,2,2,2,2,2,4),
(0.,0.0160464744498954,0.0290556433265665,0.0314011529729006,0.0327008087306735,
0.0335680430614293,0.0340928060903045,0.034604396658106,0.0355134089205356,
0.0361816048064314),.UNSPECIFIED.);
#140=B_SPLINE_CURVE_WITH_KNOTS('',3,(#17387,#17388,#17389,#17390,#17391,
#17392,#17393,#17394,#17395,#17396,#17397,#17398,#17399,#17400,#17401,#17402,
#17403,#17404,#17405,#17406,#17407,#17408),.UNSPECIFIED.,.F.,.F.,(4,2,2,
2,2,2,2,2,2,2,4),(0.10865592786745,0.109646308926771,0.110446126928495,
0.110875207555413,0.111295692828861,0.111897831246014,0.112133472973259,
0.113616860774091,0.116502526073839,0.132009856464362,0.151790034592648),
 .UNSPECIFIED.);
#141=B_SPLINE_CURVE_WITH_KNOTS('',3,(#17635,#17636,#17637,#17638,#17639,
#17640,#17641,#17642,#17643,#17644,#17645,#17646,#17647,#17648,#17649,#17650,
#17651,#17652,#17653,#17654,#17655,#17656,#17657,#17658,#17659,#17660,#17661,
#17662,#17663,#17664,#17665,#17666,#17667,#17668,#17669,#17670,#17671,#17672,
#17673,#17674),.UNSPECIFIED.,.F.,.F.,(4,3,3,3,3,3,3,3,3,3,3,3,3,4),(-1.53588974175501,
-1.40834641350412,-1.27567263038879,-1.14813396458326,-1.02056176255841,
-0.892844142337107,-0.877651281042794,-0.746380790262404,-0.615224352435456,
-0.484154057344371,-0.35311208945454,-0.222108839612364,-0.0910652623966888,
-9.31751895620802E-11),.UNSPECIFIED.);
#142=B_SPLINE_CURVE_WITH_KNOTS('',3,(#17930,#17931,#17932,#17933,#17934,
#17935,#17936,#17937,#17938,#17939,#17940,#17941,#17942,#17943,#17944,#17945),
 .UNSPECIFIED.,.F.,.F.,(4,3,3,3,3,4),(-0.031520312937802,-0.0312190954677217,
-0.0234361163162939,-0.015620919860276,-0.00780947786580983,0.),
 .UNSPECIFIED.);
#143=B_SPLINE_CURVE_WITH_KNOTS('',3,(#17950,#17951,#17952,#17953,#17954,
#17955,#17956,#17957,#17958,#17959,#17960,#17961,#17962,#17963,#17964,#17965),
 .UNSPECIFIED.,.F.,.F.,(4,3,3,3,3,4),(-0.000301222826657294,0.,0.00778311755804833,
0.0155984529939496,0.023410033901516,0.0312196506454868),.UNSPECIFIED.);
#144=B_SPLINE_CURVE_WITH_KNOTS('',3,(#18067,#18068,#18069,#18070,#18071,
#18072,#18073,#18074,#18075,#18076,#18077,#18078,#18079,#18080,#18081,#18082),
 .UNSPECIFIED.,.F.,.F.,(4,3,3,3,3,4),(-0.0315203129378757,-0.0312190954677947,
-0.023436116316329,-0.0156209198602853,-0.00780947786581242,0.),
 .UNSPECIFIED.);
#145=B_SPLINE_CURVE_WITH_KNOTS('',3,(#18124,#18125,#18126,#18127,#18128,
#18129,#18130,#18131,#18132,#18133,#18134,#18135,#18136,#18137,#18138,#18139),
 .UNSPECIFIED.,.F.,.F.,(4,3,3,3,3,4),(-0.000301222826646376,0.,0.00778311755633199,
0.0155984529901697,0.0234100338956712,0.0312196506375895),.UNSPECIFIED.);
#146=B_SPLINE_CURVE_WITH_KNOTS('',3,(#18204,#18205,#18206,#18207,#18208,
#18209,#18210,#18211,#18212,#18213,#18214,#18215,#18216,#18217,#18218,#18219,
#18220,#18221,#18222,#18223,#18224,#18225),.UNSPECIFIED.,.F.,.F.,(4,2,2,
2,2,2,2,2,2,2,4),(-0.0314877828055528,-0.0313419400201158,-0.027343633790693,
-0.0234373811477673,-0.0194336246190157,-0.0157274895553696,-0.0156233985867064,
-0.0116187540551435,-0.00781124640913577,-0.00381600968804962,0.),
 .UNSPECIFIED.);
#147=B_SPLINE_CURVE_WITH_KNOTS('',3,(#18295,#18296,#18297,#18298,#18299,
#18300,#18301,#18302,#18303,#18304,#18305,#18306,#18307,#18308,#18309,#18310,
#18311,#18312,#18313,#18314,#18315,#18316),.UNSPECIFIED.,.F.,.F.,(4,2,2,
2,2,2,2,2,2,2,4),(-0.000145834358913825,0.,0.00399834506082995,0.00790463084299194,
0.0119084280093328,0.0156145926334523,0.0157186845498575,0.0197233623367782,
0.0235309078565577,0.0275261683320379,0.0313422253865967),.UNSPECIFIED.);
#148=B_SPLINE_CURVE_WITH_KNOTS('',3,(#18454,#18455,#18456,#18457,#18458,
#18459,#18460,#18461,#18462,#18463,#18464,#18465,#18466,#18467,#18468,#18469,
#18470,#18471,#18472,#18473,#18474,#18475),.UNSPECIFIED.,.F.,.F.,(4,2,2,
2,2,2,2,2,2,2,4),(-0.0314877827964005,-0.0313419400092234,-0.0273436182587915,
-0.0234373811477688,-0.0194336451656911,-0.0157274895553722,-0.0156233985867091,
-0.0116187740281232,-0.00781124640913739,-0.00381599249373378,0.),
 .UNSPECIFIED.);
#149=B_SPLINE_CURVE_WITH_KNOTS('',3,(#18545,#18546,#18547,#18548,#18549,
#18550,#18551,#18552,#18553,#18554,#18555,#18556,#18557,#18558,#18559,#18560,
#18561,#18562,#18563,#18564,#18565,#18566),.UNSPECIFIED.,.F.,.F.,(4,2,2,
2,2,2,2,2,2,2,4),(-0.00014585203095682,0.,0.00399903197152762,0.007896867751824,
0.0119008408039746,0.0156171005478737,0.0157120964947336,0.0197170848246236,
0.0235236897918428,0.0275189843724506,0.0313334463352194),.UNSPECIFIED.);
#150=B_SPLINE_CURVE_WITH_KNOTS('',3,(#18728,#18729,#18730,#18731),
 .UNSPECIFIED.,.F.,.F.,(4,4),(0.,0.104655304260952),.UNSPECIFIED.);
#151=B_SPLINE_CURVE_WITH_KNOTS('',3,(#18735,#18736,#18737,#18738,#18739,
#18740),.UNSPECIFIED.,.F.,.F.,(4,1,1,4),(0.,0.106045082867467,0.212090165734934,
0.371157790036135),.UNSPECIFIED.);
#152=B_SPLINE_CURVE_WITH_KNOTS('',3,(#18743,#18744,#18745,#18746,#18747),
 .UNSPECIFIED.,.F.,.F.,(4,1,4),(0.108713491777723,0.212090165734934,0.371157790036135),
 .UNSPECIFIED.);
#153=B_SPLINE_CURVE_WITH_KNOTS('',3,(#18756,#18757,#18758,#18759,#18760,
#18761,#18762,#18763,#18764,#18765,#18766,#18767,#18768,#18769,#18770,#18771,
#18772,#18773,#18774,#18775),.UNSPECIFIED.,.F.,.F.,(4,2,2,2,2,2,2,2,2,4),
(0.,0.0160463331114082,0.0290723146426449,0.0314038312464017,0.0326903997016926,
0.033622050910387,0.0341490325432221,0.034719208269283,0.0359598553617216,
0.0372575917980824),.UNSPECIFIED.);
#154=B_SPLINE_CURVE_WITH_KNOTS('',3,(#18780,#18781,#18782,#18783,#18784,
#18785,#18786,#18787,#18788,#18789,#18790,#18791,#18792,#18793,#18794,#18795,
#18796,#18797,#18798,#18799),.UNSPECIFIED.,.F.,.F.,(4,2,2,2,2,2,2,2,2,4),
(0.123693214601305,0.124320452522779,0.125426844926656,0.12549207064184,
0.125596332302043,0.125631224568071,0.125883435133188,0.126374554734768,
0.12904446773964,0.132442960885972),.UNSPECIFIED.);
#155=B_SPLINE_CURVE_WITH_KNOTS('',3,(#18835,#18836,#18837,#18838,#18839),
 .UNSPECIFIED.,.F.,.F.,(4,1,4),(8.39277999693788E-16,0.159071639126486,
0.262450198348841),.UNSPECIFIED.);
#156=B_SPLINE_CURVE_WITH_KNOTS('',3,(#18843,#18844,#18845,#18846,#18847,
#18848),.UNSPECIFIED.,.F.,.F.,(4,1,1,4),(8.39277999693788E-16,0.159071639126486,
0.265119398544143,0.3711671579618),.UNSPECIFIED.);
#157=B_SPLINE_CURVE_WITH_KNOTS('',3,(#18851,#18852,#18853,#18854),
 .UNSPECIFIED.,.F.,.F.,(4,4),(0.26650853170184,0.3711671579618),
 .UNSPECIFIED.);
#158=B_SPLINE_CURVE_WITH_KNOTS('',3,(#18933,#18934,#18935,#18936,#18937,
#18938,#18939,#18940,#18941,#18942,#18943,#18944,#18945,#18946,#18947,#18948,
#18949,#18950,#18951,#18952),.UNSPECIFIED.,.F.,.F.,(4,2,2,2,2,2,2,2,2,4),
(0.,0.0160463545306403,0.0290653399989693,0.0313977104707871,0.0326908093801951,
0.0336442131361727,0.0341980828741779,0.0347887003560647,0.0360714882379335,
0.0372393214217268),.UNSPECIFIED.);
#159=B_SPLINE_CURVE_WITH_KNOTS('',3,(#18956,#18957,#18958,#18959,#18960,
#18961,#18962,#18963,#18964,#18965,#18966,#18967,#18968,#18969,#18970,#18971,
#18972,#18973,#18974,#18975,#18976,#18977,#18978,#18979),.UNSPECIFIED.,
 .F.,.F.,(4,2,2,2,2,2,2,2,2,2,2,4),(0.112832343392254,0.113790680534752,
0.115605009374288,0.116625279531252,0.117496179597272,0.11823566677225,
0.118865630124821,0.119450905002107,0.12326658722406,0.130678883385422,
0.170983762798662,0.222284222393321),.UNSPECIFIED.);
#160=B_SPLINE_CURVE_WITH_KNOTS('',3,(#19019,#19020,#19021,#19022,#19023,
#19024,#19025,#19026,#19027,#19028,#19029,#19030),.UNSPECIFIED.,.F.,.F.,
(4,2,2,2,2,4),(-0.121897046793429,-0.111949206131831,-0.0664101317022361,
-0.0333684515743887,0.,0.00042742800683713),.UNSPECIFIED.);
#161=B_SPLINE_CURVE_WITH_KNOTS('',3,(#19105,#19106,#19107,#19108,#19109,
#19110,#19111,#19112,#19113,#19114,#19115,#19116),.UNSPECIFIED.,.F.,.F.,
(4,2,2,2,2,4),(-0.126644195030822,-0.126201682326599,-0.09165569324953,
-0.0574479419888715,-0.0103009645790274,0.),.UNSPECIFIED.);
#162=B_SPLINE_CURVE_WITH_KNOTS('',3,(#19235,#19236,#19237,#19238,#19239,
#19240,#19241,#19242,#19243,#19244,#19245,#19246,#19247,#19248,#19249,#19250,
#19251,#19252,#19253,#19254,#19255,#19256,#19257,#19258,#19259,#19260,#19261,
#19262,#19263,#19264,#19265,#19266,#19267,#19268,#19269,#19270,#19271,#19272,
#19273,#19274),.UNSPECIFIED.,.F.,.F.,(4,3,3,3,3,3,3,3,3,3,3,3,3,4),(-1.53588974175501,
-1.4084151014049,-1.27572414631437,-1.1482540546387,-1.02075006460975,-0.893099502321969,
-0.877651281042794,-0.746417728679096,-0.61529960189664,-0.484268625692278,
-0.353266640440832,-0.22230354718299,-0.0912995883376735,-9.31751895620802E-11),
 .UNSPECIFIED.);
#163=B_SPLINE_CURVE_WITH_KNOTS('',3,(#19311,#19312,#19313,#19314,#19315,
#19316,#19317,#19318,#19319,#19320,#19321,#19322,#19323,#19324,#19325,#19326,
#19327,#19328,#19329,#19330,#19331,#19332,#19333,#19334,#19335,#19336,#19337,
#19338,#19339,#19340,#19341,#19342,#19343,#19344,#19345,#19346,#19347,#19348,
#19349,#19350),.UNSPECIFIED.,.F.,.F.,(4,3,3,3,3,3,3,3,3,3,3,3,3,4),(9.31931255557592E-11,
0.131013657494705,0.26199253479863,0.392964554551849,0.524029933618468,
0.655124962685855,0.786368273497865,0.877651281042812,1.0053142724878,1.13795813980461,
1.26542543820277,1.39286072995381,1.52035178679693,1.53588974175503),
 .UNSPECIFIED.);
#164=B_SPLINE_CURVE_WITH_KNOTS('',3,(#19511,#19512,#19513,#19514,#19515),
 .UNSPECIFIED.,.F.,.F.,(4,1,4),(8.39277999693788E-16,0.159071639126486,
0.262449519444739),.UNSPECIFIED.);
#165=B_SPLINE_CURVE_WITH_KNOTS('',3,(#19519,#19520,#19521,#19522),
 .UNSPECIFIED.,.F.,.F.,(4,4),(0.266507849115541,0.3711671579618),
 .UNSPECIFIED.);
#166=B_SPLINE_CURVE_WITH_KNOTS('',3,(#19526,#19527,#19528,#19529),
 .UNSPECIFIED.,.F.,.F.,(4,4),(0.,0.10465616614119),.UNSPECIFIED.);
#167=B_SPLINE_CURVE_WITH_KNOTS('',3,(#19533,#19534,#19535,#19536,#19537),
 .UNSPECIFIED.,.F.,.F.,(4,1,4),(0.108714349361827,0.212090165734934,0.371157790036135),
 .UNSPECIFIED.);
#168=B_SPLINE_CURVE_WITH_KNOTS('',3,(#19568,#19569,#19570,#19571,#19572,
#19573,#19574,#19575,#19576,#19577,#19578,#19579,#19580,#19581,#19582,#19583,
#19584,#19585,#19586,#19587,#19588,#19589,#19590,#19591,#19592,#19593,#19594,
#19595,#19596,#19597,#19598,#19599,#19600,#19601,#19602,#19603,#19604,#19605,
#19606,#19607),.UNSPECIFIED.,.F.,.F.,(4,3,3,3,3,3,3,3,3,3,3,3,3,4),(-1.53588974175501,
-1.40835317713153,-1.27567770310935,-1.14814578970787,-1.02058030414605,
-0.892869286169751,-0.877651281042794,-0.746384424886348,-0.615231757158301,
-0.484165331624194,-0.353127298796017,-0.22212800113517,-0.0910883230015044,
-9.31751895620802E-11),.UNSPECIFIED.);
#169=B_SPLINE_CURVE_WITH_KNOTS('',3,(#19616,#19617,#19618,#19619,#19620,
#19621,#19622,#19623,#19624,#19625,#19626,#19627),.UNSPECIFIED.,.F.,.F.,
(4,2,2,2,2,4),(-0.121880519721607,-0.111938804861506,-0.0664052555655539,
-0.0333660933498635,0.,0.000427383843404742),.UNSPECIFIED.);
#170=B_SPLINE_CURVE_WITH_KNOTS('',3,(#19640,#19641,#19642,#19643,#19644,
#19645,#19646,#19647,#19648,#19649,#19650,#19651),.UNSPECIFIED.,.F.,.F.,
(4,2,2,2,2,4),(-0.126638904152842,-0.126196387884251,-0.0916490831368336,
-0.0574402570255414,-0.0102944258404192,0.),.UNSPECIFIED.);
#171=B_SPLINE_CURVE_WITH_KNOTS('',3,(#19664,#19665,#19666,#19667,#19668,
#19669,#19670,#19671,#19672,#19673,#19674,#19675,#19676,#19677,#19678,#19679),
 .UNSPECIFIED.,.F.,.F.,(4,3,3,3,3,4),(-0.031520312937802,-0.0312190954677217,
-0.0234361163162939,-0.015620919860276,-0.00780947786580983,0.),
 .UNSPECIFIED.);
#172=B_SPLINE_CURVE_WITH_KNOTS('',3,(#19684,#19685,#19686,#19687,#19688,
#19689,#19690,#19691,#19692,#19693,#19694,#19695,#19696,#19697,#19698,#19699),
 .UNSPECIFIED.,.F.,.F.,(4,3,3,3,3,4),(-0.000301222826657294,0.,0.00778311755804833,
0.0155984529939496,0.023410033901516,0.0312196506454868),.UNSPECIFIED.);
#173=B_SPLINE_CURVE_WITH_KNOTS('',3,(#19801,#19802,#19803,#19804,#19805,
#19806,#19807,#19808,#19809,#19810,#19811,#19812,#19813,#19814,#19815,#19816),
 .UNSPECIFIED.,.F.,.F.,(4,3,3,3,3,4),(-0.0315203129378757,-0.0312190954677947,
-0.023436116316329,-0.0156209198602853,-0.00780947786581242,0.),
 .UNSPECIFIED.);
#174=B_SPLINE_CURVE_WITH_KNOTS('',3,(#19858,#19859,#19860,#19861,#19862,
#19863,#19864,#19865,#19866,#19867,#19868,#19869,#19870,#19871,#19872,#19873),
 .UNSPECIFIED.,.F.,.F.,(4,3,3,3,3,4),(-0.000301222826646376,0.,0.00778311755633199,
0.0155984529901697,0.0234100338956712,0.0312196506375895),.UNSPECIFIED.);
#175=B_SPLINE_CURVE_WITH_KNOTS('',3,(#19938,#19939,#19940,#19941,#19942,
#19943,#19944,#19945,#19946,#19947,#19948,#19949,#19950,#19951,#19952,#19953,
#19954,#19955,#19956,#19957,#19958,#19959),.UNSPECIFIED.,.F.,.F.,(4,2,2,
2,2,2,2,2,2,2,4),(-0.0314877828055528,-0.0313419400201158,-0.0273437887951613,
-0.0234373811477673,-0.0194334324957361,-0.0157274895553696,-0.0156233985867064,
-0.0116185672961964,-0.00781124640913577,-0.00381617041564658,0.),
 .UNSPECIFIED.);
#176=B_SPLINE_CURVE_WITH_KNOTS('',3,(#20029,#20030,#20031,#20032,#20033,
#20034,#20035,#20036,#20037,#20038,#20039,#20040,#20041,#20042,#20043,#20044,
#20045,#20046,#20047,#20048,#20049,#20050),.UNSPECIFIED.,.F.,.F.,(4,2,2,
2,2,2,2,2,2,2,4),(-0.00014583392486972,0.,0.00399819014934491,0.00790463084299194,
0.0119086202305441,0.0156145926334523,0.0157186845498575,0.0197235490245239,
0.0235309078565577,0.0275260073487496,0.0313422253865967),.UNSPECIFIED.);
#177=B_SPLINE_CURVE_WITH_KNOTS('',3,(#20188,#20189,#20190,#20191,#20192,
#20193,#20194,#20195,#20196,#20197,#20198,#20199,#20200,#20201,#20202,#20203,
#20204,#20205,#20206,#20207,#20208,#20209),.UNSPECIFIED.,.F.,.F.,(4,2,2,
2,2,2,2,2,2,2,4),(-0.0314877827964005,-0.0313419400092234,-0.0273437836466247,
-0.0234373811477688,-0.0194334401785241,-0.0157274895553722,-0.0156233985867091,
-0.0116185747653081,-0.00781124640913739,-0.00381616398957783,0.),
 .UNSPECIFIED.);
#178=B_SPLINE_CURVE_WITH_KNOTS('',3,(#20279,#20280,#20281,#20282,#20283,
#20284,#20285,#20286,#20287,#20288,#20289,#20290,#20291,#20292,#20293,#20294,
#20295,#20296,#20297,#20298,#20299,#20300),.UNSPECIFIED.,.F.,.F.,(4,2,2,
2,2,2,2,2,2,2,4),(-0.000145851143784934,0.,0.00399886667673787,0.007896867751824,
0.011901047052215,0.0156171005478737,0.0157120964947336,0.0197172834100546,
0.0235236897918428,0.0275188123932298,0.0313334463352194),.UNSPECIFIED.);
#179=B_SPLINE_CURVE_WITH_KNOTS('',3,(#20461,#20462,#20463,#20464,#20465,
#20466),.UNSPECIFIED.,.F.,.F.,(4,1,1,4),(0.,0.106045082867467,0.212090165734934,
0.371157790036135),.UNSPECIFIED.);
#180=B_SPLINE_CURVE_WITH_KNOTS('',3,(#20476,#20477,#20478,#20479,#20480,
#20481,#20482,#20483,#20484,#20485,#20486,#20487,#20488,#20489,#20490,#20491,
#20492,#20493,#20494,#20495),.UNSPECIFIED.,.F.,.F.,(4,2,2,2,2,2,2,2,2,4),
(0.,0.0160464828454861,0.0290662952982683,0.0314084535419406,0.0327019406931159,
0.0335471096246944,0.034041542474996,0.0345908288641486,0.0357041272540126,
0.0366956048689898),.UNSPECIFIED.);
#181=B_SPLINE_CURVE_WITH_KNOTS('',3,(#20500,#20501,#20502,#20503,#20504,
#20505,#20506,#20507,#20508,#20509,#20510,#20511,#20512,#20513,#20514,#20515,
#20516,#20517,#20518,#20519,#20520,#20521),.UNSPECIFIED.,.F.,.F.,(4,2,2,
2,2,2,2,2,2,2,4),(0.110050297608956,0.110972642432848,0.111441452132821,
0.111683366938536,0.111932422987071,0.112289008512329,0.112465112969751,
0.113527006478567,0.115588639332176,0.126738353769125,0.140942353992558),
 .UNSPECIFIED.);
#182=B_SPLINE_CURVE_WITH_KNOTS('',3,(#20556,#20557,#20558,#20559,#20560,
#20561),.UNSPECIFIED.,.F.,.F.,(4,1,1,4),(8.39277999693788E-16,0.159071639126486,
0.265119398544143,0.3711671579618),.UNSPECIFIED.);
#183=B_SPLINE_CURVE_WITH_KNOTS('',3,(#20635,#20636,#20637,#20638,#20639,
#20640,#20641,#20642,#20643,#20644,#20645,#20646,#20647,#20648,#20649,#20650,
#20651,#20652,#20653,#20654),.UNSPECIFIED.,.F.,.F.,(4,2,2,2,2,2,2,2,2,4),
(0.,0.0160464909215418,0.0290630748200725,0.031403094719159,0.0327013486005693,
0.0335555937595079,0.034086015838492,0.0345976735648822,0.0355235615815274,
0.0362771808673595),.UNSPECIFIED.);
#184=B_SPLINE_CURVE_WITH_KNOTS('',3,(#20658,#20659,#20660,#20661,#20662,
#20663,#20664,#20665,#20666,#20667,#20668,#20669,#20670,#20671,#20672,#20673,
#20674,#20675,#20676,#20677,#20678,#20679),.UNSPECIFIED.,.F.,.F.,(4,2,2,
2,2,2,2,2,2,2,4),(0.108952969663346,0.109928703863034,0.110693465394644,
0.111106407122213,0.11151552323153,0.112087353545963,0.112320186258428,
0.113765800736477,0.116569806170817,0.131692894660669,0.150971860824745),
 .UNSPECIFIED.);
#185=B_SPLINE_CURVE_WITH_KNOTS('',3,(#20932,#20933,#20934,#20935,#20936,
#20937,#20938,#20939,#20940,#20941,#20942,#20943,#20944,#20945,#20946,#20947,
#20948,#20949,#20950,#20951,#20952,#20953,#20954,#20955,#20956,#20957,#20958,
#20959,#20960,#20961,#20962,#20963,#20964,#20965,#20966,#20967,#20968,#20969,
#20970,#20971),.UNSPECIFIED.,.F.,.F.,(4,3,3,3,3,3,3,3,3,3,3,3,3,4),(9.31931255557592E-11,
0.131042735840593,0.262051012367144,0.393052488515332,0.524146754062267,
0.655270214126867,0.78654061063713,0.877651281042812,1.00536343953691,1.13799501509144,
1.26551270526215,1.39299855420544,1.52053994652395,1.53588974175503),
 .UNSPECIFIED.);
#186=B_SPLINE_CURVE_WITH_KNOTS('',3,(#21280,#21281,#21282,#21283,#21284,
#21285,#21286,#21287,#21288,#21289,#21290,#21291,#21292,#21293,#21294,#21295,
#21296,#21297,#21298,#21299,#21300,#21301,#21302,#21303,#21304,#21305,#21306,
#21307,#21308,#21309,#21310,#21311,#21312,#21313,#21314,#21315,#21316,#21317,
#21318,#21319,#21320,#21321,#21322,#21323,#21324,#21325,#21326,#21327,#21328,
#21329,#21330,#21331,#21332,#21333,#21334,#21335,#21336,#21337,#21338,#21339,
#21340,#21341,#21342,#21343,#21344,#21345,#21346,#21347,#21348,#21349,#21350,
#21351,#21352,#21353,#21354,#21355,#21356,#21357,#21358,#21359,#21360,#21361,
#21362,#21363,#21364,#21365,#21366,#21367,#21368,#21369,#21370,#21371,#21372,
#21373,#21374,#21375,#21376,#21377,#21378,#21379,#21380,#21381,#21382,#21383,
#21384,#21385,#21386,#21387,#21388,#21389,#21390,#21391,#21392,#21393,#21394,
#21395,#21396,#21397,#21398,#21399,#21400,#21401,#21402,#21403,#21404,#21405,
#21406,#21407,#21408,#21409,#21410,#21411,#21412,#21413,#21414,#21415,#21416,
#21417,#21418,#21419,#21420,#21421,#21422,#21423,#21424,#21425,#21426,#21427,
#21428,#21429,#21430,#21431,#21432,#21433,#21434,#21435,#21436,#21437,#21438,
#21439,#21440,#21441,#21442,#21443,#21444,#21445,#21446,#21447,#21448,#21449,
#21450,#21451,#21452,#21453,#21454,#21455,#21456,#21457,#21458,#21459,#21460,
#21461,#21462,#21463,#21464,#21465,#21466,#21467,#21468,#21469,#21470,#21471,
#21472,#21473,#21474,#21475,#21476,#21477,#21478,#21479,#21480,#21481,#21482,
#21483,#21484),.UNSPECIFIED.,.F.,.F.,(4,3,3,3,3,3,3,3,3,3,3,3,3,3,3,3,3,
3,3,3,3,3,3,3,3,3,3,3,3,3,3,3,3,3,3,3,3,3,3,3,3,3,3,3,3,3,3,3,3,3,3,3,3,
3,3,3,3,3,3,3,3,3,3,3,3,3,3,3,4),(0.0412288287282469,0.221789122225791,
0.410907246482706,0.603343024613838,0.801527145066835,0.978261619253451,
1.03960375288993,1.2596817878818,1.47422443808081,1.68313496007081,1.8850271371275,
1.91529441048294,2.0481405484971,2.30849723855234,2.57594999491681,2.85837470081147,
3.06509393699643,3.16467146545559,3.42186826497041,3.67360557628572,3.78935999294192,
4.08759764006129,4.42577042019447,4.73225373405452,5.03873704791457,5.11423841261277,
5.36363120855012,5.51057788847094,5.6634255754009,5.87947625880347,6.09204886613398,
6.14258946121498,6.28811410288722,6.60039877091668,6.92129400220457,7.17213628201259,
7.49368372740555,7.53749115785987,7.79712824824582,8.062491693378,8.1621796853462,
8.20053827651463,8.60890650770284,8.97316393887675,9.22663960312775,9.41155674031885,
9.62203633273613,9.73022298935168,9.94830657690068,10.1713291088,10.2482839659554,
10.3485895315483,10.5775019414366,10.8015941313125,11.0209912908511,11.2328360117167,
11.2642391711016,11.2856223227778,11.5198805205852,11.7460867455792,11.9711554379887,
12.1951774128727,12.2226551140073,12.2715587248536,12.4671779997945,12.6564564803085,
12.8422190170054,13.0230929537961,13.1596834902265),.UNSPECIFIED.);
#187=B_SPLINE_CURVE_WITH_KNOTS('',3,(#21486,#21487,#21488,#21489,#21490,
#21491,#21492,#21493,#21494,#21495,#21496,#21497,#21498,#21499,#21500,#21501,
#21502,#21503,#21504,#21505,#21506,#21507,#21508,#21509,#21510,#21511,#21512,
#21513,#21514,#21515,#21516),.UNSPECIFIED.,.F.,.F.,(4,3,3,3,3,3,3,3,3,3,
4),(3.80317853510332E-6,0.00849477139108245,0.0168875892124504,0.020049617484239,
0.0276124959032426,0.0299168105232885,0.0382288927362805,0.0440406975809168,
0.0483208088901014,0.053387373094551,0.0566747277123349),.UNSPECIFIED.);
#188=B_SPLINE_CURVE_WITH_KNOTS('',3,(#21517,#21518,#21519,#21520,#21521,
#21522,#21523,#21524,#21525,#21526,#21527,#21528,#21529,#21530,#21531,#21532,
#21533,#21534,#21535,#21536,#21537,#21538,#21539,#21540,#21541,#21542,#21543,
#21544,#21545,#21546,#21547,#21548,#21549,#21550,#21551,#21552,#21553,#21554,
#21555,#21556,#21557,#21558),.UNSPECIFIED.,.F.,.F.,(4,2,2,2,2,2,2,2,2,2,
2,2,2,2,2,2,2,2,2,2,4),(0.,0.0151722942569832,0.0310250894662037,0.0468778846754243,
0.0622362197741321,0.0739322244790637,0.0892986682078788,0.0937555523841565,
0.109036705765569,0.124834847461721,0.140632989157873,0.156526338525243,
0.172018299163169,0.187510259801096,0.203007866388426,0.218505472975755,
0.234387456517476,0.249679814626145,0.264926907382231,0.279391116722822,
0.280437551918127),.UNSPECIFIED.);
#189=B_SPLINE_CURVE_WITH_KNOTS('',3,(#21837,#21838,#21839,#21840,#21841,
#21842,#21843,#21844,#21845,#21846,#21847,#21848,#21849,#21850,#21851,#21852,
#21853,#21854,#21855,#21856,#21857,#21858,#21859,#21860,#21861,#21862,#21863,
#21864,#21865,#21866,#21867,#21868,#21869,#21870,#21871,#21872,#21873,#21874,
#21875,#21876,#21877,#21878,#21879,#21880,#21881,#21882,#21883,#21884,#21885,
#21886,#21887,#21888,#21889,#21890,#21891),.UNSPECIFIED.,.F.,.F.,(4,1,1,
1,1,1,1,1,1,1,1,1,1,1,1,1,1,1,1,1,1,1,1,1,1,1,1,1,1,1,1,1,1,1,1,1,1,1,1,
1,1,1,1,1,1,1,1,1,1,1,1,1,4),(71.4890715653831,72.4732026174104,73.4573336694377,
74.441464721465,75.4255957734922,76.4097268255195,77.3938578775468,78.3779889295741,
79.3621199816014,80.3462510336287,81.330382085656,82.3145131376833,83.2986441897105,
84.2827752417378,85.2669062937651,86.2510373457924,87.2351683978197,88.219299449847,
89.2034305018743,90.1875615539016,91.1716926059289,92.1558236579561,93.1399547099834,
94.1240857620107,95.108216814038,96.0923478660653,97.0764789180926,98.0606099701199,
99.0447410221472,100.028872074174,101.013003126202,101.997134178229,102.981265230256,
103.965396282284,104.949527334311,105.933658386338,106.917789438365,107.901920490393,
108.88605154242,109.870182594447,110.854313646475,111.838444698502,112.822575750529,
113.806706802556,114.790837854584,115.774968906611,116.759099958638,117.743231010666,
118.727362062693,119.71149311472,120.695624166748,121.679755218775,122.521734338655),
 .UNSPECIFIED.);
#190=B_SPLINE_CURVE_WITH_KNOTS('',3,(#21892,#21893,#21894,#21895,#21896,
#21897,#21898,#21899,#21900,#21901,#21902,#21903,#21904,#21905,#21906,#21907,
#21908,#21909,#21910,#21911,#21912,#21913,#21914,#21915,#21916,#21917,#21918,
#21919,#21920,#21921,#21922,#21923,#21924,#21925,#21926,#21927,#21928,#21929,
#21930,#21931,#21932,#21933,#21934,#21935,#21936,#21937,#21938,#21939,#21940,
#21941,#21942,#21943,#21944,#21945,#21946,#21947,#21948,#21949,#21950,#21951,
#21952,#21953,#21954,#21955,#21956,#21957,#21958,#21959,#21960,#21961),
 .UNSPECIFIED.,.F.,.F.,(4,3,3,3,3,3,3,3,3,3,3,3,3,3,3,3,3,3,3,3,3,3,3,4),
(0.00454862606666727,0.0097813043742714,0.0151929350740396,0.0208778770871651,
0.024840740824827,0.0317493456825585,0.0350226779644142,0.0431312185255888,
0.0514098440357677,0.0598204772507784,0.0655684893831757,0.0747982903716654,
0.0838199769910237,0.0851242701332721,0.0943061234778781,0.103331697515573,
0.106296237941524,0.113383420063562,0.120188854955014,0.126660112220699,
0.131960438957808,0.13709585362951,0.142059920064691,0.147023986499873),
 .UNSPECIFIED.);
#191=B_SPLINE_CURVE_WITH_KNOTS('',3,(#21963,#21964,#21965,#21966,#21967,
#21968,#21969,#21970,#21971,#21972,#21973,#21974,#21975,#21976,#21977,#21978,
#21979,#21980,#21981,#21982,#21983,#21984,#21985,#21986,#21987,#21988,#21989,
#21990,#21991,#21992,#21993,#21994,#21995,#21996,#21997,#21998,#21999,#22000,
#22001,#22002,#22003,#22004,#22005,#22006,#22007,#22008,#22009,#22010,#22011),
 .UNSPECIFIED.,.F.,.F.,(4,1,1,1,1,1,1,1,1,1,1,1,1,1,1,1,1,1,1,1,1,1,1,1,
1,1,1,1,1,1,1,1,1,1,1,1,1,1,1,1,1,1,1,1,1,1,4),(38.6285863087061,39.5728225110057,
40.5569515506878,41.54108059037,42.5252096300521,43.5093386697343,44.4934677094164,
45.4775967490986,46.4617257887807,47.4458548284629,48.429983868145,49.4141129078271,
50.3982419475093,51.3823709871914,52.3665000268736,53.3506290665557,54.3347581062379,
55.31888714592,56.3030161856022,57.2871452252843,58.2712742649664,59.2554033046486,
60.2395323443307,61.2236613840129,62.207790423695,63.1919194633772,64.1760485030593,
65.1601775427415,66.1443065824236,67.1284356221058,68.1125646617879,69.0966937014701,
70.0808227411522,71.0649517808343,72.0490808205165,73.0332098601986,74.0173388998808,
75.0014679395629,75.9855969792451,76.9697260189272,77.9538550586094,78.9379840982915,
79.9221131379737,80.9062421776558,81.890371217338,82.8745002570201,83.6063337785035),
 .UNSPECIFIED.);
#192=B_SPLINE_CURVE_WITH_KNOTS('',3,(#22013,#22014,#22015,#22016,#22017,
#22018,#22019,#22020,#22021,#22022,#22023,#22024),.UNSPECIFIED.,.F.,.F.,
(4,2,2,2,2,4),(-3.33658576709956,-2.84111411479529,-2.17756431515054,-1.48317770395856,
-0.758265368492167,-0.524622525151951),.UNSPECIFIED.);
#193=B_SPLINE_CURVE_WITH_KNOTS('',3,(#22025,#22026,#22027,#22028,#22029,
#22030,#22031,#22032,#22033,#22034,#22035,#22036,#22037,#22038),
 .UNSPECIFIED.,.F.,.F.,(4,2,2,2,2,2,4),(-0.524622525151951,1.33226762955019E-15,
0.449240854504617,0.89362815800914,1.71207377940215,2.56103421468922,2.60440050708431),
 .UNSPECIFIED.);
#194=B_SPLINE_CURVE_WITH_KNOTS('',3,(#22417,#22418,#22419,#22420,#22421,
#22422,#22423,#22424,#22425,#22426,#22427,#22428,#22429,#22430,#22431,#22432),
 .UNSPECIFIED.,.F.,.F.,(4,2,2,2,2,2,2,4),(1.44973500750154E-5,0.000308894159769587,
0.0040394778907865,0.00529153122396304,0.0056083211413137,0.00577885183818179,
0.00588274404008685,0.00596328090548145),.UNSPECIFIED.);
#195=B_SPLINE_CURVE_WITH_KNOTS('',3,(#22434,#22435,#22436,#22437,#22438,
#22439,#22440,#22441,#22442,#22443,#22444,#22445),.UNSPECIFIED.,.F.,.F.,
(4,2,2,2,2,4),(-6.32310609163009,-5.86698254546378,-5.34770511135925,-4.61293714645099,
-3.85838280909712,-3.16264048045977),.UNSPECIFIED.);
#196=B_SPLINE_CURVE_WITH_KNOTS('',3,(#22446,#22447,#22448,#22449,#22450,
#22451,#22452,#22453,#22454,#22455,#22456,#22457,#22458,#22459,#22460,#22461,
#22462,#22463,#22464,#22465,#22466,#22467,#22468,#22469,#22470,#22471,#22472,
#22473,#22474,#22475,#22476,#22477,#22478,#22479,#22480,#22481,#22482,#22483,
#22484,#22485,#22486,#22487,#22488,#22489,#22490,#22491,#22492,#22493,#22494,
#22495,#22496,#22497,#22498,#22499,#22500,#22501,#22502,#22503,#22504,#22505,
#22506,#22507,#22508,#22509,#22510,#22511,#22512,#22513,#22514,#22515,#22516,
#22517,#22518,#22519,#22520,#22521,#22522,#22523,#22524,#22525,#22526,#22527),
 .UNSPECIFIED.,.F.,.F.,(4,3,3,3,3,3,3,3,3,3,3,3,3,3,3,3,3,3,3,3,3,3,3,3,
3,3,3,4),(-3.16264047718316,-3.08914875434871,-2.96237338819809,-2.8985069785749,
-2.77284046736089,-2.64586869253785,-2.51885797567965,-2.39281474429913,
-2.30760309088764,-2.17871636927115,-2.04954899887158,-1.92706454594731,
-1.79267984622219,-1.65829514649707,-1.52604009412243,-1.39730863216455,
-1.2675151064389,-1.1379039488608,-1.00956685799686,-0.959492520541506,
-0.829871226316355,-0.752949420833071,-0.628007892392552,-0.502066796416564,
-0.376053683307309,-0.250757418653661,-0.125378709326831,2.22044604925031E-16),
 .UNSPECIFIED.);
#197=B_SPLINE_CURVE_WITH_KNOTS('',3,(#22833,#22834,#22835,#22836,#22837,
#22838,#22839,#22840,#22841,#22842,#22843,#22844,#22845,#22846,#22847,#22848,
#22849,#22850,#22851,#22852,#22853,#22854,#22855,#22856,#22857,#22858,#22859,
#22860,#22861,#22862,#22863,#22864,#22865,#22866,#22867,#22868,#22869,#22870,
#22871,#22872,#22873,#22874,#22875,#22876,#22877,#22878,#22879,#22880,#22881),
 .UNSPECIFIED.,.F.,.F.,(4,1,1,1,1,1,1,1,1,1,1,1,1,1,1,1,1,1,1,1,1,1,1,1,
1,1,1,1,1,1,1,1,1,1,1,1,1,1,1,1,1,1,1,1,1,1,4),(38.6285863168267,39.572822511006,
40.5569515506881,41.5410805903703,42.5252096300524,43.5093386697345,44.4934677094167,
45.4775967490988,46.461725788781,47.4458548284631,48.4299838681452,49.4141129078274,
50.3982419475095,51.3823709871916,52.3665000268738,53.3506290665559,54.3347581062381,
55.3188871459202,56.3030161856024,57.2871452252845,58.2712742649666,59.2554033046488,
60.2395323443309,61.2236613840131,62.2077904236952,63.1919194633773,64.1760485030595,
65.1601775427416,66.1443065824238,67.1284356221059,68.112564661788,69.0966937014702,
70.0808227411523,71.0649517808345,72.0490808205166,73.0332098601987,74.0173388998809,
75.001467939563,75.9855969792451,76.9697260189273,77.9538550586094,78.9379840982916,
79.9221131379737,80.9062421776559,81.890371217338,82.8745002570201,83.6063335655065),
 .UNSPECIFIED.);
#198=B_SPLINE_CURVE_WITH_KNOTS('',3,(#22883,#22884,#22885,#22886,#22887,
#22888,#22889,#22890,#22891,#22892,#22893,#22894,#22895,#22896,#22897,#22898,
#22899,#22900,#22901,#22902,#22903,#22904,#22905,#22906,#22907,#22908,#22909,
#22910,#22911,#22912,#22913,#22914,#22915,#22916,#22917,#22918,#22919,#22920,
#22921,#22922,#22923,#22924,#22925,#22926,#22927,#22928,#22929,#22930,#22931,
#22932,#22933,#22934,#22935,#22936,#22937,#22938,#22939,#22940,#22941,#22942,
#22943,#22944,#22945,#22946,#22947,#22948,#22949,#22950,#22951,#22952,#22953,
#22954,#22955,#22956,#22957,#22958,#22959,#22960,#22961,#22962,#22963,#22964,
#22965,#22966,#22967,#22968,#22969,#22970),.UNSPECIFIED.,.F.,.F.,(4,3,3,
3,3,3,3,3,3,3,3,3,3,3,3,3,3,3,3,3,3,3,3,3,3,3,3,3,3,4),(-3.33658600359424,
-3.22605947542936,-3.11553294726448,-3.01045731120899,-2.90308188251533,
-2.84111411479529,-2.73863331930997,-2.63447300231061,-2.5281387994222,
-2.42091193547411,-2.31292756133742,-2.23923942147634,-2.17756431515054,
-2.07310664232342,-1.96672259527004,-1.85854212671028,-1.74814494338787,
-1.63683189090119,-1.52483790093356,-1.48317770395856,-1.36834848358747,
-1.33664811812315,-1.22526698835352,-1.1086137075275,-0.991960426701485,
-0.874025786641275,-0.758265368492164,-0.648319927727279,-0.53674262362201,
-0.524622531539792),.UNSPECIFIED.);
#199=B_SPLINE_CURVE_WITH_KNOTS('',3,(#22972,#22973,#22974,#22975,#22976,
#22977,#22978,#22979,#22980,#22981,#22982,#22983,#22984,#22985,#22986,#22987,
#22988,#22989,#22990,#22991,#22992,#22993,#22994,#22995,#22996,#22997,#22998,
#22999,#23000,#23001,#23002,#23003,#23004,#23005,#23006,#23007,#23008,#23009,
#23010,#23011,#23012,#23013,#23014,#23015,#23016,#23017,#23018,#23019,#23020,
#23021,#23022,#23023,#23024,#23025,#23026,#23027,#23028,#23029,#23030,#23031,
#23032,#23033,#23034,#23035,#23036,#23037,#23038,#23039,#23040,#23041,#23042,
#23043,#23044,#23045,#23046,#23047,#23048,#23049,#23050,#23051,#23052,#23053,
#23054,#23055,#23056,#23057,#23058,#23059),.UNSPECIFIED.,.F.,.F.,(4,3,3,
3,3,3,3,3,3,3,3,3,3,3,3,3,3,3,3,3,3,3,3,3,3,3,3,3,3,4),(-0.524622525151951,
-0.40298519959575,-0.281450424942774,-0.158177262963561,-0.0327896004862798,
-5.55111512312578E-16,0.120706418602285,0.241430642920991,0.361267317865586,
0.449240854504615,0.558106444725192,0.67081051651852,0.786573407048536,
0.893628158009139,1.01435758688346,1.13691290432254,1.26178744368503,1.38767737403646,
1.51440413753823,1.55850431796037,1.68304450254717,1.71207377940215,1.8301575052245,
1.94984573566041,2.07096226097101,2.19375426534282,2.31709347012668,2.44058146945554,
2.56103421468922,2.6044005070181),.UNSPECIFIED.);
#200=B_SPLINE_CURVE_WITH_KNOTS('',3,(#23061,#23062,#23063,#23064,#23065,
#23066,#23067,#23068,#23069,#23070,#23071,#23072,#23073,#23074,#23075,#23076,
#23077,#23078,#23079,#23080,#23081,#23082,#23083,#23084,#23085,#23086,#23087,
#23088,#23089,#23090,#23091,#23092,#23093,#23094,#23095,#23096,#23097,#23098,
#23099,#23100,#23101,#23102,#23103,#23104,#23105,#23106,#23107,#23108,#23109,
#23110,#23111,#23112,#23113,#23114,#23115),.UNSPECIFIED.,.F.,.F.,(4,1,1,
1,1,1,1,1,1,1,1,1,1,1,1,1,1,1,1,1,1,1,1,1,1,1,1,1,1,1,1,1,1,1,1,1,1,1,1,
1,1,1,1,1,1,1,1,1,1,1,1,1,4),(71.4890715653831,72.4732026174104,73.4573336694377,
74.4414647214649,75.4255957734922,76.4097268255195,77.3938578775468,78.3779889295741,
79.3621199816014,80.3462510336286,81.3303820856559,82.3145131376832,83.2986441897105,
84.2827752417378,85.266906293765,86.2510373457923,87.2351683978196,88.2192994498469,
89.2034305018742,90.1875615539014,91.1716926059287,92.155823657956,93.1399547099833,
94.1240857620106,95.1082168140379,96.0923478660652,97.0764789180924,98.0606099701197,
99.044741022147,100.028872074174,101.013003126202,101.997134178229,102.981265230256,
103.965396282283,104.949527334311,105.933658386338,106.917789438365,107.901920490393,
108.88605154242,109.870182594447,110.854313646474,111.838444698502,112.822575750529,
113.806706802556,114.790837854584,115.774968906611,116.759099958638,117.743231010665,
118.727362062693,119.71149311472,120.695624166747,121.679755218774,122.521734176477),
 .UNSPECIFIED.);
#201=B_SPLINE_CURVE_WITH_KNOTS('',3,(#23117,#23118,#23119,#23120,#23121,
#23122,#23123,#23124),.UNSPECIFIED.,.F.,.F.,(4,1,1,1,1,4),(0.00454875662819086,
0.0248407408244626,0.0452046151036898,0.0859323636621443,0.116478175080985,
0.147010117920896),.UNSPECIFIED.);
#202=B_SPLINE_CURVE_WITH_KNOTS('',3,(#23125,#23126,#23127,#23128,#23129,
#23130,#23131,#23132,#23133,#23134,#23135,#23136,#23137,#23138,#23139,#23140,
#23141,#23142,#23143,#23144,#23145,#23146,#23147,#23148,#23149,#23150,#23151,
#23152,#23153,#23154,#23155),.UNSPECIFIED.,.F.,.F.,(4,3,3,3,3,3,3,3,3,3,
4),(0.,0.00849249692220259,0.0168892121186266,0.0200496174832653,0.0276350915004354,
0.029916810509521,0.0382288926446508,0.0440406975546362,0.0483208090448931,
0.0533873735052337,0.0566747284290745),.UNSPECIFIED.);
#203=B_SPLINE_CURVE_WITH_KNOTS('',3,(#23512,#23513,#23514,#23515,#23516,
#23517,#23518,#23519,#23520,#23521,#23522,#23523,#23524,#23525,#23526,#23527,
#23528,#23529,#23530,#23531,#23532,#23533,#23534,#23535,#23536,#23537,#23538,
#23539,#23540,#23541,#23542,#23543,#23544,#23545,#23546,#23547,#23548,#23549,
#23550,#23551,#23552,#23553,#23554,#23555,#23556,#23557,#23558,#23559,#23560,
#23561,#23562,#23563,#23564,#23565,#23566,#23567,#23568,#23569,#23570,#23571,
#23572,#23573,#23574,#23575,#23576,#23577,#23578,#23579,#23580,#23581,#23582,
#23583,#23584,#23585,#23586,#23587,#23588,#23589,#23590,#23591,#23592,#23593,
#23594,#23595,#23596,#23597,#23598,#23599,#23600,#23601,#23602,#23603,#23604,
#23605,#23606,#23607,#23608,#23609,#23610,#23611,#23612,#23613,#23614,#23615,
#23616,#23617,#23618,#23619,#23620,#23621,#23622,#23623,#23624,#23625,#23626,
#23627,#23628,#23629,#23630,#23631,#23632,#23633,#23634,#23635,#23636,#23637,
#23638,#23639,#23640,#23641,#23642,#23643,#23644,#23645,#23646,#23647,#23648,
#23649,#23650,#23651,#23652,#23653,#23654,#23655,#23656,#23657,#23658,#23659,
#23660,#23661,#23662,#23663,#23664,#23665,#23666,#23667,#23668,#23669,#23670,
#23671,#23672,#23673,#23674,#23675,#23676,#23677,#23678,#23679,#23680,#23681,
#23682,#23683,#23684,#23685,#23686,#23687,#23688,#23689,#23690,#23691,#23692,
#23693,#23694,#23695,#23696,#23697,#23698,#23699,#23700,#23701,#23702,#23703,
#23704,#23705,#23706,#23707,#23708,#23709,#23710,#23711,#23712,#23713,#23714,
#23715,#23716,#23717,#23718,#23719,#23720,#23721,#23722,#23723,#23724,#23725,
#23726,#23727,#23728,#23729,#23730,#23731,#23732,#23733,#23734,#23735,#23736,
#23737,#23738,#23739,#23740,#23741,#23742,#23743,#23744,#23745,#23746,#23747,
#23748,#23749,#23750,#23751,#23752,#23753,#23754,#23755,#23756,#23757,#23758,
#23759,#23760,#23761,#23762,#23763,#23764,#23765,#23766,#23767,#23768,#23769,
#23770,#23771,#23772,#23773,#23774,#23775,#23776,#23777,#23778,#23779,#23780,
#23781,#23782,#23783,#23784,#23785,#23786,#23787,#23788,#23789,#23790,#23791,
#23792,#23793,#23794,#23795,#23796,#23797,#23798,#23799,#23800,#23801,#23802,
#23803,#23804,#23805,#23806,#23807,#23808,#23809,#23810,#23811,#23812,#23813,
#23814,#23815,#23816,#23817,#23818,#23819,#23820,#23821),.UNSPECIFIED.,
 .F.,.F.,(4,3,3,3,3,3,3,3,3,3,3,3,3,3,3,3,3,3,3,3,3,3,3,3,3,3,3,3,3,3,3,
3,3,3,3,3,3,3,3,3,3,3,3,3,3,3,3,3,3,3,3,3,3,3,3,3,3,3,3,3,3,3,3,3,3,3,3,
3,3,3,3,3,3,3,3,3,3,3,3,3,3,3,3,3,3,3,3,3,3,3,3,3,3,3,3,3,3,3,3,3,3,3,3,
4),(0.0412288809174448,0.255336004128647,0.469187354302896,0.694437382737418,
0.746685937510845,0.967509340561917,0.978212371585419,1.03939871383864,
1.23524804167897,1.27691990041605,1.51444108699346,1.71489535037727,1.83280377750746,
1.91534961376108,2.00577741397102,2.04826367227011,2.27425929775981,2.29744677581058,
2.53622411477568,2.56191842168732,2.7735896291954,2.83023125741359,2.85221544749441,
3.03321390682216,3.06506780018559,3.09204495714788,3.26291806889366,3.37985208710422,
3.61148472053238,3.67043529448783,3.78939987040998,3.8956952363813,4.06111987333268,
4.08762934044846,4.27712358884999,4.40678032400433,4.7065112688478,4.90848206105861,
5.03862983293559,5.05265279478816,5.11408463948668,5.43495988602522,5.47606726813505,
5.52301928816514,5.66338002695415,5.88140909242613,5.92340542575312,6.108941770858,
6.14277187487768,6.28834991665634,6.3440234246751,6.52433368156382,6.70625619737873,
6.76200882174979,6.97981700015605,7.16714257131264,7.23273033026613,7.4759188560077,
7.5351488553815,7.53742779472412,7.64931050880888,7.88515646728426,7.98635664678989,
8.16228438603862,8.20058318047703,8.4321995447053,8.63078967690261,8.77240855303368,
8.87080475509852,9.09128916344029,9.22656007349451,9.41134273660477,9.52607881231599,
9.6085442428473,9.85001397937764,9.89182238097967,10.0362469946963,10.1724837576764,
10.3629843458928,10.4623501966441,10.6466967106672,10.8269799920935,10.9344861105422,
11.1241295988283,11.1985897816415,11.2641317631133,11.2853670214593,11.5062459794987,
11.7244367922284,11.7439833898647,11.9295870809189,11.9756137314473,12.1986767775481,
12.222868980479,12.3660770503737,12.5150063875628,12.6986287534162,12.8101194221871,
12.969554254921,13.0646210800732,13.1121544926493,13.1359211989373,13.1478045520813,
13.1596879052253),.UNSPECIFIED.);
#204=B_SPLINE_CURVE_WITH_KNOTS('',3,(#23822,#23823,#23824,#23825,#23826,
#23827,#23828,#23829,#23830,#23831,#23832,#23833,#23834,#23835,#23836,#23837,
#23838,#23839,#23840,#23841,#23842,#23843,#23844,#23845,#23846,#23847,#23848,
#23849,#23850,#23851,#23852),.UNSPECIFIED.,.F.,.F.,(4,3,3,3,3,3,3,3,3,3,
4),(9.54904796711932E-6,0.000308894168186242,0.00184010390341906,0.0037437438839363,
0.0040394780403736,0.00477223025765887,0.00529153143436818,0.0056083213415191,
0.00577885204733888,0.00588274427073256,0.0059632811481824),
 .UNSPECIFIED.);
#205=B_SPLINE_CURVE_WITH_KNOTS('',3,(#23854,#23855,#23856,#23857,#23858,
#23859,#23860,#23861,#23862,#23863,#23864,#23865),.UNSPECIFIED.,.F.,.F.,
(4,2,2,2,2,4),(-6.32310609163009,-5.86698254546378,-5.34770511135925,-4.61293714645098,
-3.85838280909711,-3.16264048045977),.UNSPECIFIED.);
#206=B_SPLINE_CURVE_WITH_KNOTS('',3,(#23866,#23867,#23868,#23869,#23870,
#23871,#23872,#23873,#23874,#23875,#23876,#23877,#23878,#23879,#23880,#23881,
#23882,#23883,#23884,#23885,#23886,#23887,#23888,#23889,#23890,#23891,#23892,
#23893,#23894,#23895,#23896,#23897,#23898,#23899,#23900,#23901,#23902,#23903,
#23904,#23905,#23906,#23907,#23908,#23909,#23910,#23911,#23912,#23913,#23914,
#23915,#23916,#23917,#23918,#23919,#23920,#23921,#23922,#23923,#23924,#23925,
#23926,#23927,#23928,#23929,#23930,#23931,#23932,#23933,#23934,#23935,#23936,
#23937,#23938,#23939,#23940,#23941,#23942,#23943,#23944,#23945,#23946,#23947,
#23948,#23949,#23950),.UNSPECIFIED.,.F.,.F.,(4,3,3,3,3,3,3,3,3,3,3,3,3,
3,3,3,3,3,3,3,3,3,3,3,3,3,3,3,4),(-3.16264046994983,-3.08914875434872,-2.96202862009855,
-2.89850469959275,-2.77200562717487,-2.65264488848641,-2.52524461887924,
-2.39876801569602,-2.30760309088765,-2.17875694633235,-2.04958339673065,
-1.92706178034683,-1.79788966876892,-1.66196488144567,-1.53349664652545,
-1.52604009412243,-1.39743073588067,-1.26776965804926,-1.13829898720914,
-1.01011281617808,-0.959481302904771,-0.830020341174354,-0.752949420833073,
-0.628174831283254,-0.502406682573838,-0.376584644673174,-0.251510922084939,
-0.12575546104247,0.),.UNSPECIFIED.);
#207=B_SPLINE_CURVE_WITH_KNOTS('',3,(#24093,#24094,#24095,#24096,#24097,
#24098,#24099,#24100,#24101,#24102,#24103,#24104,#24105,#24106,#24107,#24108,
#24109,#24110,#24111,#24112,#24113,#24114,#24115,#24116,#24117,#24118,#24119,
#24120),.UNSPECIFIED.,.F.,.F.,(4,3,3,3,3,3,3,3,3,4),(0.,0.456519336804935,
0.976247361871037,1.71165290465597,2.46686198905274,3.23676352882868,4.01898736043049,
4.801228540377,5.57499004518528,6.32859282043213),.UNSPECIFIED.);
#208=B_SPLINE_CURVE_WITH_KNOTS('',3,(#24134,#24135,#24136,#24137,#24138,
#24139,#24140,#24141,#24142,#24143,#24144,#24145,#24146,#24147,#24148,#24149,
#24150,#24151,#24152,#24153,#24154,#24155),.UNSPECIFIED.,.F.,.F.,(4,2,2,
2,2,2,2,2,2,2,4),(-2.60440050708431,-2.56103421468922,-1.71207377940215,
-0.89362815800914,-0.449240854504616,4.44089209850063E-16,0.758265368492167,
1.48317770395856,2.17756431515054,2.84111411479529,3.33658600359424),
 .UNSPECIFIED.);
#209=B_SPLINE_CURVE_WITH_KNOTS('',3,(#24304,#24305,#24306,#24307,#24308,
#24309,#24310,#24311,#24312,#24313,#24314,#24315,#24316,#24317,#24318,#24319,
#24320,#24321,#24322,#24323,#24324,#24325,#24326,#24327,#24328,#24329,#24330,
#24331),.UNSPECIFIED.,.F.,.F.,(4,3,3,3,3,3,3,3,3,4),(-6.32859282042855,
-5.57499004518213,-4.80122854037429,-4.01898736042822,-3.23676352882685,
-2.46686198905135,-1.711652904655,-0.976247361870486,-0.456519336804677,
0.),.UNSPECIFIED.);
#210=B_SPLINE_CURVE_WITH_KNOTS('',3,(#24335,#24336,#24337,#24338,#24339,
#24340,#24341,#24342,#24343,#24344,#24345,#24346,#24347,#24348,#24349,#24350,
#24351,#24352,#24353,#24354,#24355,#24356),.UNSPECIFIED.,.F.,.F.,(4,2,2,
2,2,2,2,2,2,2,4),(-2.60440050708431,-2.56103421468922,-1.71207377940215,
-0.89362815800914,-0.449240854504616,4.44089209850063E-16,0.758265368492167,
1.48317770395856,2.17756431515054,2.84111411479529,3.33658600359424),
 .UNSPECIFIED.);
#211=B_SPLINE_CURVE_WITH_KNOTS('',3,(#24722,#24723,#24724,#24725,#24726,
#24727,#24728,#24729,#24730,#24731,#24732,#24733,#24734,#24735,#24736,#24737,
#24738,#24739,#24740,#24741,#24742,#24743,#24744,#24745,#24746,#24747,#24748,
#24749,#24750,#24751,#24752,#24753,#24754,#24755,#24756,#24757,#24758,#24759,
#24760,#24761,#24762,#24763),.UNSPECIFIED.,.F.,.F.,(4,2,2,2,2,2,2,2,2,2,
2,2,2,2,2,2,2,2,2,2,4),(0.,0.0151726455788584,0.0310252651269492,0.04687788467504,
0.0622361066463819,0.0739322244786084,0.0892979216519021,0.0937555523832803,
0.109036013651428,0.124834501403941,0.140632989156455,0.156526338524812,
0.172018299161974,0.187510259799136,0.203007866387068,0.218505472975,0.234387456515599,
0.249682437495948,0.264926311409363,0.27939111677063,0.280437551969199),
 .UNSPECIFIED.);
#212=PLANE('',#10000);
#213=PLANE('',#10016);
#214=PLANE('',#10032);
#215=PLANE('',#10048);
#216=PLANE('',#10051);
#217=PLANE('',#10069);
#218=PLANE('',#10072);
#219=PLANE('',#10090);
#220=PLANE('',#10093);
#221=PLANE('',#10119);
#222=PLANE('',#10122);
#223=PLANE('',#10147);
#224=PLANE('',#10205);
#225=PLANE('',#10213);
#226=PLANE('',#10218);
#227=PLANE('',#10219);
#228=PLANE('',#10227);
#229=PLANE('',#10246);
#230=PLANE('',#10247);
#231=PLANE('',#10248);
#232=PLANE('',#10249);
#233=PLANE('',#10250);
#234=PLANE('',#10251);
#235=PLANE('',#10252);
#236=PLANE('',#10253);
#237=PLANE('',#10254);
#238=PLANE('',#10255);
#239=PLANE('',#10267);
#240=PLANE('',#10268);
#241=PLANE('',#10269);
#242=PLANE('',#10271);
#243=PLANE('',#10277);
#244=PLANE('',#10278);
#245=PLANE('',#10282);
#246=PLANE('',#10283);
#247=PLANE('',#10284);
#248=PLANE('',#10285);
#249=PLANE('',#10303);
#250=PLANE('',#10306);
#251=PLANE('',#10324);
#252=PLANE('',#10327);
#253=PLANE('',#10353);
#254=PLANE('',#10356);
#255=PLANE('',#10381);
#256=PLANE('',#10434);
#257=PLANE('',#10442);
#258=PLANE('',#10447);
#259=PLANE('',#10448);
#260=PLANE('',#10456);
#261=PLANE('',#10475);
#262=PLANE('',#10476);
#263=PLANE('',#10477);
#264=PLANE('',#10478);
#265=PLANE('',#10479);
#266=PLANE('',#10480);
#267=PLANE('',#10481);
#268=PLANE('',#10482);
#269=PLANE('',#10483);
#270=PLANE('',#10484);
#271=PLANE('',#10485);
#272=PLANE('',#10491);
#273=PLANE('',#10497);
#274=PLANE('',#10501);
#275=PLANE('',#10519);
#276=PLANE('',#10522);
#277=PLANE('',#10540);
#278=PLANE('',#10543);
#279=PLANE('',#10569);
#280=PLANE('',#10572);
#281=PLANE('',#10597);
#282=PLANE('',#10654);
#283=PLANE('',#10662);
#284=PLANE('',#10667);
#285=PLANE('',#10668);
#286=PLANE('',#10676);
#287=PLANE('',#10695);
#288=PLANE('',#10696);
#289=PLANE('',#10697);
#290=PLANE('',#10698);
#291=PLANE('',#10699);
#292=PLANE('',#10700);
#293=PLANE('',#10701);
#294=PLANE('',#10702);
#295=PLANE('',#10703);
#296=PLANE('',#10711);
#297=PLANE('',#10712);
#298=PLANE('',#10713);
#299=PLANE('',#10715);
#300=PLANE('',#10716);
#301=PLANE('',#10720);
#302=PLANE('',#10721);
#303=PLANE('',#10722);
#304=PLANE('',#10723);
#305=PLANE('',#10741);
#306=PLANE('',#10744);
#307=PLANE('',#10762);
#308=PLANE('',#10765);
#309=PLANE('',#10791);
#310=PLANE('',#10794);
#311=PLANE('',#10819);
#312=PLANE('',#10871);
#313=PLANE('',#10879);
#314=PLANE('',#10884);
#315=PLANE('',#10885);
#316=PLANE('',#10893);
#317=PLANE('',#10912);
#318=PLANE('',#10913);
#319=PLANE('',#10914);
#320=PLANE('',#10915);
#321=PLANE('',#10916);
#322=PLANE('',#10917);
#323=PLANE('',#10918);
#324=PLANE('',#10919);
#325=PLANE('',#10920);
#326=PLANE('',#10921);
#327=PLANE('',#10922);
#328=PLANE('',#10928);
#329=PLANE('',#10942);
#330=PLANE('',#10957);
#331=PLANE('',#10961);
#332=PLANE('',#10969);
#333=PLANE('',#10979);
#334=PLANE('',#10986);
#335=PLANE('',#10990);
#336=PLANE('',#10994);
#337=PLANE('',#11005);
#338=PLANE('',#11009);
#339=PLANE('',#11010);
#340=PLANE('',#11011);
#341=PLANE('',#11014);
#342=PLANE('',#11017);
#343=PLANE('',#11018);
#344=PLANE('',#11024);
#345=PLANE('',#11028);
#346=PLANE('',#11032);
#347=PLANE('',#11033);
#348=PLANE('',#11034);
#349=PLANE('',#11038);
#350=PLANE('',#11047);
#351=PLANE('',#11064);
#352=PLANE('',#11065);
#353=PLANE('',#11068);
#354=PLANE('',#11071);
#355=PLANE('',#11076);
#356=PLANE('',#11079);
#357=PLANE('',#11080);
#358=PLANE('',#11085);
#359=PLANE('',#11098);
#360=PLANE('',#11101);
#361=PLANE('',#11119);
#362=PLANE('',#11120);
#363=PLANE('',#11123);
#364=PLANE('',#11124);
#365=PLANE('',#11127);
#366=PLANE('',#11131);
#367=PLANE('',#11133);
#368=PLANE('',#11134);
#369=PLANE('',#11136);
#370=PLANE('',#11147);
#371=LINE('',#14216,#1035);
#372=LINE('',#14217,#1036);
#373=LINE('',#14250,#1037);
#374=LINE('',#14253,#1038);
#375=LINE('',#14256,#1039);
#376=LINE('',#14259,#1040);
#377=LINE('',#14262,#1041);
#378=LINE('',#14263,#1042);
#379=LINE('',#14266,#1043);
#380=LINE('',#14305,#1044);
#381=LINE('',#14306,#1045);
#382=LINE('',#14339,#1046);
#383=LINE('',#14342,#1047);
#384=LINE('',#14345,#1048);
#385=LINE('',#14348,#1049);
#386=LINE('',#14351,#1050);
#387=LINE('',#14352,#1051);
#388=LINE('',#14355,#1052);
#389=LINE('',#14394,#1053);
#390=LINE('',#14395,#1054);
#391=LINE('',#14428,#1055);
#392=LINE('',#14431,#1056);
#393=LINE('',#14434,#1057);
#394=LINE('',#14437,#1058);
#395=LINE('',#14440,#1059);
#396=LINE('',#14441,#1060);
#397=LINE('',#14444,#1061);
#398=LINE('',#14483,#1062);
#399=LINE('',#14484,#1063);
#400=LINE('',#14517,#1064);
#401=LINE('',#14520,#1065);
#402=LINE('',#14523,#1066);
#403=LINE('',#14526,#1067);
#404=LINE('',#14529,#1068);
#405=LINE('',#14530,#1069);
#406=LINE('',#14533,#1070);
#407=LINE('',#14537,#1071);
#408=LINE('',#14538,#1072);
#409=LINE('',#14542,#1073);
#410=LINE('',#14546,#1074);
#411=LINE('',#14589,#1075);
#412=LINE('',#14592,#1076);
#413=LINE('',#14624,#1077);
#414=LINE('',#14625,#1078);
#415=LINE('',#14660,#1079);
#416=LINE('',#14661,#1080);
#417=LINE('',#14664,#1081);
#418=LINE('',#14666,#1082);
#419=LINE('',#14667,#1083);
#420=LINE('',#14670,#1084);
#421=LINE('',#14674,#1085);
#422=LINE('',#14675,#1086);
#423=LINE('',#14679,#1087);
#424=LINE('',#14683,#1088);
#425=LINE('',#14734,#1089);
#426=LINE('',#14735,#1090);
#427=LINE('',#14762,#1091);
#428=LINE('',#14765,#1092);
#429=LINE('',#14797,#1093);
#430=LINE('',#14798,#1094);
#431=LINE('',#14801,#1095);
#432=LINE('',#14803,#1096);
#433=LINE('',#14804,#1097);
#434=LINE('',#14807,#1098);
#435=LINE('',#14811,#1099);
#436=LINE('',#14812,#1100);
#437=LINE('',#14816,#1101);
#438=LINE('',#14820,#1102);
#439=LINE('',#14936,#1103);
#440=LINE('',#14939,#1104);
#441=LINE('',#14998,#1105);
#442=LINE('',#15027,#1106);
#443=LINE('',#15030,#1107);
#444=LINE('',#15035,#1108);
#445=LINE('',#15037,#1109);
#446=LINE('',#15039,#1110);
#447=LINE('',#15043,#1111);
#448=LINE('',#15045,#1112);
#449=LINE('',#15047,#1113);
#450=LINE('',#15051,#1114);
#451=LINE('',#15053,#1115);
#452=LINE('',#15055,#1116);
#453=LINE('',#15056,#1117);
#454=LINE('',#15058,#1118);
#455=LINE('',#15059,#1119);
#456=LINE('',#15061,#1120);
#457=LINE('',#15066,#1121);
#458=LINE('',#15070,#1122);
#459=LINE('',#15185,#1123);
#460=LINE('',#15188,#1124);
#461=LINE('',#15271,#1125);
#462=LINE('',#15273,#1126);
#463=LINE('',#15274,#1127);
#464=LINE('',#15276,#1128);
#465=LINE('',#15393,#1129);
#466=LINE('',#15395,#1130);
#467=LINE('',#15421,#1131);
#468=LINE('',#15477,#1132);
#469=LINE('',#15478,#1133);
#470=LINE('',#15484,#1134);
#471=LINE('',#15488,#1135);
#472=LINE('',#15576,#1136);
#473=LINE('',#15577,#1137);
#474=LINE('',#15601,#1138);
#475=LINE('',#15603,#1139);
#476=LINE('',#15604,#1140);
#477=LINE('',#15606,#1141);
#478=LINE('',#15611,#1142);
#479=LINE('',#15612,#1143);
#480=LINE('',#15655,#1144);
#481=LINE('',#15656,#1145);
#482=LINE('',#15658,#1146);
#483=LINE('',#15659,#1147);
#484=LINE('',#15689,#1148);
#485=LINE('',#15691,#1149);
#486=LINE('',#15694,#1150);
#487=LINE('',#15695,#1151);
#488=LINE('',#15700,#1152);
#489=LINE('',#15701,#1153);
#490=LINE('',#15776,#1154);
#491=LINE('',#15808,#1155);
#492=LINE('',#15811,#1156);
#493=LINE('',#15814,#1157);
#494=LINE('',#15817,#1158);
#495=LINE('',#15820,#1159);
#496=LINE('',#15823,#1160);
#497=LINE('',#15826,#1161);
#498=LINE('',#15829,#1162);
#499=LINE('',#15830,#1163);
#500=LINE('',#15833,#1164);
#501=LINE('',#15902,#1165);
#502=LINE('',#15905,#1166);
#503=LINE('',#15908,#1167);
#504=LINE('',#15979,#1168);
#505=LINE('',#15980,#1169);
#506=LINE('',#16102,#1170);
#507=LINE('',#16104,#1171);
#508=LINE('',#16105,#1172);
#509=LINE('',#16107,#1173);
#510=LINE('',#16108,#1174);
#511=LINE('',#16110,#1175);
#512=LINE('',#16112,#1176);
#513=LINE('',#16114,#1177);
#514=LINE('',#16115,#1178);
#515=LINE('',#16120,#1179);
#516=LINE('',#16124,#1180);
#517=LINE('',#16126,#1181);
#518=LINE('',#16128,#1182);
#519=LINE('',#16132,#1183);
#520=LINE('',#16136,#1184);
#521=LINE('',#16140,#1185);
#522=LINE('',#16144,#1186);
#523=LINE('',#16204,#1187);
#524=LINE('',#16206,#1188);
#525=LINE('',#16223,#1189);
#526=LINE('',#16240,#1190);
#527=LINE('',#16244,#1191);
#528=LINE('',#16245,#1192);
#529=LINE('',#16248,#1193);
#530=LINE('',#16249,#1194);
#531=LINE('',#16252,#1195);
#532=LINE('',#16254,#1196);
#533=LINE('',#16260,#1197);
#534=LINE('',#16264,#1198);
#535=LINE('',#16268,#1199);
#536=LINE('',#16270,#1200);
#537=LINE('',#16272,#1201);
#538=LINE('',#16276,#1202);
#539=LINE('',#16278,#1203);
#540=LINE('',#16280,#1204);
#541=LINE('',#16284,#1205);
#542=LINE('',#16285,#1206);
#543=LINE('',#16288,#1207);
#544=LINE('',#16289,#1208);
#545=LINE('',#16291,#1209);
#546=LINE('',#16294,#1210);
#547=LINE('',#16338,#1211);
#548=LINE('',#16354,#1212);
#549=LINE('',#16355,#1213);
#550=LINE('',#16359,#1214);
#551=LINE('',#16361,#1215);
#552=LINE('',#16363,#1216);
#553=LINE('',#16365,#1217);
#554=LINE('',#16380,#1218);
#555=LINE('',#16381,#1219);
#556=LINE('',#16384,#1220);
#557=LINE('',#16385,#1221);
#558=LINE('',#16389,#1222);
#559=LINE('',#16393,#1223);
#560=LINE('',#16436,#1224);
#561=LINE('',#16439,#1225);
#562=LINE('',#16471,#1226);
#563=LINE('',#16472,#1227);
#564=LINE('',#16507,#1228);
#565=LINE('',#16508,#1229);
#566=LINE('',#16511,#1230);
#567=LINE('',#16513,#1231);
#568=LINE('',#16514,#1232);
#569=LINE('',#16517,#1233);
#570=LINE('',#16521,#1234);
#571=LINE('',#16522,#1235);
#572=LINE('',#16526,#1236);
#573=LINE('',#16530,#1237);
#574=LINE('',#16581,#1238);
#575=LINE('',#16582,#1239);
#576=LINE('',#16609,#1240);
#577=LINE('',#16612,#1241);
#578=LINE('',#16644,#1242);
#579=LINE('',#16645,#1243);
#580=LINE('',#16648,#1244);
#581=LINE('',#16650,#1245);
#582=LINE('',#16651,#1246);
#583=LINE('',#16654,#1247);
#584=LINE('',#16658,#1248);
#585=LINE('',#16659,#1249);
#586=LINE('',#16663,#1250);
#587=LINE('',#16667,#1251);
#588=LINE('',#16783,#1252);
#589=LINE('',#16786,#1253);
#590=LINE('',#16845,#1254);
#591=LINE('',#16874,#1255);
#592=LINE('',#16877,#1256);
#593=LINE('',#16882,#1257);
#594=LINE('',#16884,#1258);
#595=LINE('',#16886,#1259);
#596=LINE('',#16890,#1260);
#597=LINE('',#16892,#1261);
#598=LINE('',#16894,#1262);
#599=LINE('',#16898,#1263);
#600=LINE('',#16900,#1264);
#601=LINE('',#16902,#1265);
#602=LINE('',#16903,#1266);
#603=LINE('',#16905,#1267);
#604=LINE('',#16906,#1268);
#605=LINE('',#16908,#1269);
#606=LINE('',#16913,#1270);
#607=LINE('',#16917,#1271);
#608=LINE('',#17032,#1272);
#609=LINE('',#17035,#1273);
#610=LINE('',#17118,#1274);
#611=LINE('',#17120,#1275);
#612=LINE('',#17121,#1276);
#613=LINE('',#17123,#1277);
#614=LINE('',#17226,#1278);
#615=LINE('',#17228,#1279);
#616=LINE('',#17252,#1280);
#617=LINE('',#17294,#1281);
#618=LINE('',#17299,#1282);
#619=LINE('',#17384,#1283);
#620=LINE('',#17385,#1284);
#621=LINE('',#17409,#1285);
#622=LINE('',#17411,#1286);
#623=LINE('',#17412,#1287);
#624=LINE('',#17414,#1288);
#625=LINE('',#17419,#1289);
#626=LINE('',#17420,#1290);
#627=LINE('',#17449,#1291);
#628=LINE('',#17450,#1292);
#629=LINE('',#17452,#1293);
#630=LINE('',#17453,#1294);
#631=LINE('',#17481,#1295);
#632=LINE('',#17483,#1296);
#633=LINE('',#17486,#1297);
#634=LINE('',#17487,#1298);
#635=LINE('',#17492,#1299);
#636=LINE('',#17493,#1300);
#637=LINE('',#17554,#1301);
#638=LINE('',#17587,#1302);
#639=LINE('',#17590,#1303);
#640=LINE('',#17593,#1304);
#641=LINE('',#17596,#1305);
#642=LINE('',#17599,#1306);
#643=LINE('',#17603,#1307);
#644=LINE('',#17604,#1308);
#645=LINE('',#17607,#1309);
#646=LINE('',#17676,#1310);
#647=LINE('',#17679,#1311);
#648=LINE('',#17710,#1312);
#649=LINE('',#17832,#1313);
#650=LINE('',#17834,#1314);
#651=LINE('',#17835,#1315);
#652=LINE('',#17837,#1316);
#653=LINE('',#17838,#1317);
#654=LINE('',#17840,#1318);
#655=LINE('',#17842,#1319);
#656=LINE('',#17844,#1320);
#657=LINE('',#17845,#1321);
#658=LINE('',#17850,#1322);
#659=LINE('',#17854,#1323);
#660=LINE('',#17856,#1324);
#661=LINE('',#17858,#1325);
#662=LINE('',#17861,#1326);
#663=LINE('',#17862,#1327);
#664=LINE('',#17865,#1328);
#665=LINE('',#17867,#1329);
#666=LINE('',#17871,#1330);
#667=LINE('',#17873,#1331);
#668=LINE('',#17875,#1332);
#669=LINE('',#17879,#1333);
#670=LINE('',#17881,#1334);
#671=LINE('',#17883,#1335);
#672=LINE('',#17887,#1336);
#673=LINE('',#17891,#1337);
#674=LINE('',#17894,#1338);
#675=LINE('',#17900,#1339);
#676=LINE('',#17904,#1340);
#677=LINE('',#17909,#1341);
#678=LINE('',#17910,#1342);
#679=LINE('',#17911,#1343);
#680=LINE('',#17915,#1344);
#681=LINE('',#17920,#1345);
#682=LINE('',#17921,#1346);
#683=LINE('',#17925,#1347);
#684=LINE('',#17929,#1348);
#685=LINE('',#17972,#1349);
#686=LINE('',#17975,#1350);
#687=LINE('',#18007,#1351);
#688=LINE('',#18008,#1352);
#689=LINE('',#18043,#1353);
#690=LINE('',#18044,#1354);
#691=LINE('',#18047,#1355);
#692=LINE('',#18049,#1356);
#693=LINE('',#18050,#1357);
#694=LINE('',#18053,#1358);
#695=LINE('',#18057,#1359);
#696=LINE('',#18058,#1360);
#697=LINE('',#18062,#1361);
#698=LINE('',#18066,#1362);
#699=LINE('',#18117,#1363);
#700=LINE('',#18118,#1364);
#701=LINE('',#18145,#1365);
#702=LINE('',#18148,#1366);
#703=LINE('',#18180,#1367);
#704=LINE('',#18181,#1368);
#705=LINE('',#18184,#1369);
#706=LINE('',#18186,#1370);
#707=LINE('',#18187,#1371);
#708=LINE('',#18190,#1372);
#709=LINE('',#18194,#1373);
#710=LINE('',#18195,#1374);
#711=LINE('',#18199,#1375);
#712=LINE('',#18203,#1376);
#713=LINE('',#18319,#1377);
#714=LINE('',#18322,#1378);
#715=LINE('',#18381,#1379);
#716=LINE('',#18410,#1380);
#717=LINE('',#18413,#1381);
#718=LINE('',#18418,#1382);
#719=LINE('',#18420,#1383);
#720=LINE('',#18422,#1384);
#721=LINE('',#18426,#1385);
#722=LINE('',#18428,#1386);
#723=LINE('',#18430,#1387);
#724=LINE('',#18434,#1388);
#725=LINE('',#18436,#1389);
#726=LINE('',#18438,#1390);
#727=LINE('',#18439,#1391);
#728=LINE('',#18441,#1392);
#729=LINE('',#18442,#1393);
#730=LINE('',#18444,#1394);
#731=LINE('',#18449,#1395);
#732=LINE('',#18453,#1396);
#733=LINE('',#18568,#1397);
#734=LINE('',#18571,#1398);
#735=LINE('',#18654,#1399);
#736=LINE('',#18656,#1400);
#737=LINE('',#18657,#1401);
#738=LINE('',#18659,#1402);
#739=LINE('',#18776,#1403);
#740=LINE('',#18778,#1404);
#741=LINE('',#18800,#1405);
#742=LINE('',#18856,#1406);
#743=LINE('',#18857,#1407);
#744=LINE('',#18863,#1408);
#745=LINE('',#18867,#1409);
#746=LINE('',#18953,#1410);
#747=LINE('',#18954,#1411);
#748=LINE('',#18980,#1412);
#749=LINE('',#18982,#1413);
#750=LINE('',#18983,#1414);
#751=LINE('',#18985,#1415);
#752=LINE('',#18990,#1416);
#753=LINE('',#18991,#1417);
#754=LINE('',#19034,#1418);
#755=LINE('',#19035,#1419);
#756=LINE('',#19037,#1420);
#757=LINE('',#19038,#1421);
#758=LINE('',#19065,#1422);
#759=LINE('',#19067,#1423);
#760=LINE('',#19070,#1424);
#761=LINE('',#19071,#1425);
#762=LINE('',#19076,#1426);
#763=LINE('',#19077,#1427);
#764=LINE('',#19152,#1428);
#765=LINE('',#19184,#1429);
#766=LINE('',#19187,#1430);
#767=LINE('',#19190,#1431);
#768=LINE('',#19194,#1432);
#769=LINE('',#19197,#1433);
#770=LINE('',#19200,#1434);
#771=LINE('',#19203,#1435);
#772=LINE('',#19204,#1436);
#773=LINE('',#19207,#1437);
#774=LINE('',#19276,#1438);
#775=LINE('',#19279,#1439);
#776=LINE('',#19282,#1440);
#777=LINE('',#19353,#1441);
#778=LINE('',#19354,#1442);
#779=LINE('',#19476,#1443);
#780=LINE('',#19478,#1444);
#781=LINE('',#19479,#1445);
#782=LINE('',#19481,#1446);
#783=LINE('',#19482,#1447);
#784=LINE('',#19484,#1448);
#785=LINE('',#19486,#1449);
#786=LINE('',#19488,#1450);
#787=LINE('',#19489,#1451);
#788=LINE('',#19494,#1452);
#789=LINE('',#19498,#1453);
#790=LINE('',#19500,#1454);
#791=LINE('',#19502,#1455);
#792=LINE('',#19507,#1456);
#793=LINE('',#19524,#1457);
#794=LINE('',#19540,#1458);
#795=LINE('',#19542,#1459);
#796=LINE('',#19545,#1460);
#797=LINE('',#19548,#1461);
#798=LINE('',#19549,#1462);
#799=LINE('',#19554,#1463);
#800=LINE('',#19555,#1464);
#801=LINE('',#19557,#1465);
#802=LINE('',#19560,#1466);
#803=LINE('',#19561,#1467);
#804=LINE('',#19564,#1468);
#805=LINE('',#19608,#1469);
#806=LINE('',#19611,#1470);
#807=LINE('',#19612,#1471);
#808=LINE('',#19629,#1472);
#809=LINE('',#19631,#1473);
#810=LINE('',#19633,#1474);
#811=LINE('',#19634,#1475);
#812=LINE('',#19637,#1476);
#813=LINE('',#19639,#1477);
#814=LINE('',#19654,#1478);
#815=LINE('',#19655,#1479);
#816=LINE('',#19659,#1480);
#817=LINE('',#19663,#1481);
#818=LINE('',#19706,#1482);
#819=LINE('',#19709,#1483);
#820=LINE('',#19741,#1484);
#821=LINE('',#19742,#1485);
#822=LINE('',#19777,#1486);
#823=LINE('',#19778,#1487);
#824=LINE('',#19781,#1488);
#825=LINE('',#19783,#1489);
#826=LINE('',#19784,#1490);
#827=LINE('',#19787,#1491);
#828=LINE('',#19791,#1492);
#829=LINE('',#19792,#1493);
#830=LINE('',#19796,#1494);
#831=LINE('',#19800,#1495);
#832=LINE('',#19851,#1496);
#833=LINE('',#19852,#1497);
#834=LINE('',#19879,#1498);
#835=LINE('',#19882,#1499);
#836=LINE('',#19914,#1500);
#837=LINE('',#19915,#1501);
#838=LINE('',#19918,#1502);
#839=LINE('',#19920,#1503);
#840=LINE('',#19921,#1504);
#841=LINE('',#19924,#1505);
#842=LINE('',#19928,#1506);
#843=LINE('',#19929,#1507);
#844=LINE('',#19933,#1508);
#845=LINE('',#19937,#1509);
#846=LINE('',#20053,#1510);
#847=LINE('',#20056,#1511);
#848=LINE('',#20115,#1512);
#849=LINE('',#20144,#1513);
#850=LINE('',#20147,#1514);
#851=LINE('',#20152,#1515);
#852=LINE('',#20154,#1516);
#853=LINE('',#20156,#1517);
#854=LINE('',#20160,#1518);
#855=LINE('',#20162,#1519);
#856=LINE('',#20164,#1520);
#857=LINE('',#20168,#1521);
#858=LINE('',#20170,#1522);
#859=LINE('',#20172,#1523);
#860=LINE('',#20173,#1524);
#861=LINE('',#20175,#1525);
#862=LINE('',#20176,#1526);
#863=LINE('',#20178,#1527);
#864=LINE('',#20183,#1528);
#865=LINE('',#20187,#1529);
#866=LINE('',#20302,#1530);
#867=LINE('',#20305,#1531);
#868=LINE('',#20388,#1532);
#869=LINE('',#20390,#1533);
#870=LINE('',#20391,#1534);
#871=LINE('',#20393,#1535);
#872=LINE('',#20496,#1536);
#873=LINE('',#20498,#1537);
#874=LINE('',#20522,#1538);
#875=LINE('',#20564,#1539);
#876=LINE('',#20569,#1540);
#877=LINE('',#20571,#1541);
#878=LINE('',#20655,#1542);
#879=LINE('',#20656,#1543);
#880=LINE('',#20680,#1544);
#881=LINE('',#20682,#1545);
#882=LINE('',#20683,#1546);
#883=LINE('',#20685,#1547);
#884=LINE('',#20690,#1548);
#885=LINE('',#20691,#1549);
#886=LINE('',#20720,#1550);
#887=LINE('',#20721,#1551);
#888=LINE('',#20723,#1552);
#889=LINE('',#20724,#1553);
#890=LINE('',#20750,#1554);
#891=LINE('',#20753,#1555);
#892=LINE('',#20754,#1556);
#893=LINE('',#20759,#1557);
#894=LINE('',#20760,#1558);
#895=LINE('',#20821,#1559);
#896=LINE('',#20854,#1560);
#897=LINE('',#20857,#1561);
#898=LINE('',#20861,#1562);
#899=LINE('',#20864,#1563);
#900=LINE('',#20868,#1564);
#901=LINE('',#20869,#1565);
#902=LINE('',#20872,#1566);
#903=LINE('',#20902,#1567);
#904=LINE('',#20974,#1568);
#905=LINE('',#20975,#1569);
#906=LINE('',#21097,#1570);
#907=LINE('',#21099,#1571);
#908=LINE('',#21100,#1572);
#909=LINE('',#21102,#1573);
#910=LINE('',#21103,#1574);
#911=LINE('',#21105,#1575);
#912=LINE('',#21107,#1576);
#913=LINE('',#21109,#1577);
#914=LINE('',#21110,#1578);
#915=LINE('',#21115,#1579);
#916=LINE('',#21119,#1580);
#917=LINE('',#21121,#1581);
#918=LINE('',#21123,#1582);
#919=LINE('',#21125,#1583);
#920=LINE('',#21127,#1584);
#921=LINE('',#21133,#1585);
#922=LINE('',#21137,#1586);
#923=LINE('',#21142,#1587);
#924=LINE('',#21143,#1588);
#925=LINE('',#21144,#1589);
#926=LINE('',#21148,#1590);
#927=LINE('',#21155,#1591);
#928=LINE('',#22531,#1592);
#929=LINE('',#22535,#1593);
#930=LINE('',#22539,#1594);
#931=LINE('',#22544,#1595);
#932=LINE('',#22546,#1596);
#933=LINE('',#22548,#1597);
#934=LINE('',#22549,#1598);
#935=LINE('',#22555,#1599);
#936=LINE('',#23169,#1600);
#937=LINE('',#23170,#1601);
#938=LINE('',#23181,#1602);
#939=LINE('',#23182,#1603);
#940=LINE('',#23184,#1604);
#941=LINE('',#23185,#1605);
#942=LINE('',#23189,#1606);
#943=LINE('',#23192,#1607);
#944=LINE('',#23194,#1608);
#945=LINE('',#23195,#1609);
#946=LINE('',#23955,#1610);
#947=LINE('',#23966,#1611);
#948=LINE('',#23970,#1612);
#949=LINE('',#23975,#1613);
#950=LINE('',#23983,#1614);
#951=LINE('',#23986,#1615);
#952=LINE('',#23994,#1616);
#953=LINE('',#24000,#1617);
#954=LINE('',#24001,#1618);
#955=LINE('',#24002,#1619);
#956=LINE('',#24007,#1620);
#957=LINE('',#24010,#1621);
#958=LINE('',#24011,#1622);
#959=LINE('',#24025,#1623);
#960=LINE('',#24028,#1624);
#961=LINE('',#24032,#1625);
#962=LINE('',#24036,#1626);
#963=LINE('',#24039,#1627);
#964=LINE('',#24043,#1628);
#965=LINE('',#24048,#1629);
#966=LINE('',#24091,#1630);
#967=LINE('',#24121,#1631);
#968=LINE('',#24131,#1632);
#969=LINE('',#24204,#1633);
#970=LINE('',#24205,#1634);
#971=LINE('',#24208,#1635);
#972=LINE('',#24209,#1636);
#973=LINE('',#24213,#1637);
#974=LINE('',#24216,#1638);
#975=LINE('',#24217,#1639);
#976=LINE('',#24221,#1640);
#977=LINE('',#24222,#1641);
#978=LINE('',#24225,#1642);
#979=LINE('',#24226,#1643);
#980=LINE('',#24233,#1644);
#981=LINE('',#24234,#1645);
#982=LINE('',#24238,#1646);
#983=LINE('',#24244,#1647);
#984=LINE('',#24245,#1648);
#985=LINE('',#24246,#1649);
#986=LINE('',#24250,#1650);
#987=LINE('',#24256,#1651);
#988=LINE('',#24257,#1652);
#989=LINE('',#24258,#1653);
#990=LINE('',#24260,#1654);
#991=LINE('',#24261,#1655);
#992=LINE('',#24332,#1656);
#993=LINE('',#24333,#1657);
#994=LINE('',#24362,#1658);
#995=LINE('',#24372,#1659);
#996=LINE('',#24378,#1660);
#997=LINE('',#24386,#1661);
#998=LINE('',#24396,#1662);
#999=LINE('',#24404,#1663);
#1000=LINE('',#24405,#1664);
#1001=LINE('',#24408,#1665);
#1002=LINE('',#24410,#1666);
#1003=LINE('',#24411,#1667);
#1004=LINE('',#24416,#1668);
#1005=LINE('',#24417,#1669);
#1006=LINE('',#24421,#1670);
#1007=LINE('',#24424,#1671);
#1008=LINE('',#24425,#1672);
#1009=LINE('',#24431,#1673);
#1010=LINE('',#24434,#1674);
#1011=LINE('',#24435,#1675);
#1012=LINE('',#24439,#1676);
#1013=LINE('',#24442,#1677);
#1014=LINE('',#24443,#1678);
#1015=LINE('',#24445,#1679);
#1016=LINE('',#24467,#1680);
#1017=LINE('',#24470,#1681);
#1018=LINE('',#24479,#1682);
#1019=LINE('',#24490,#1683);
#1020=LINE('',#24497,#1684);
#1021=LINE('',#24498,#1685);
#1022=LINE('',#24500,#1686);
#1023=LINE('',#24501,#1687);
#1024=LINE('',#24503,#1688);
#1025=LINE('',#24508,#1689);
#1026=LINE('',#24509,#1690);
#1027=LINE('',#24513,#1691);
#1028=LINE('',#24516,#1692);
#1029=LINE('',#24517,#1693);
#1030=LINE('',#24521,#1694);
#1031=LINE('',#24523,#1695);
#1032=LINE('',#24525,#1696);
#1033=LINE('',#24527,#1697);
#1034=LINE('',#24877,#1698);
#1035=VECTOR('',#11178,10.);
#1036=VECTOR('',#11179,10.);
#1037=VECTOR('',#11188,10.);
#1038=VECTOR('',#11191,0.5);
#1039=VECTOR('',#11194,10.);
#1040=VECTOR('',#11197,1.);
#1041=VECTOR('',#11200,10.);
#1042=VECTOR('',#11201,10.);
#1043=VECTOR('',#11204,10.);
#1044=VECTOR('',#11219,10.);
#1045=VECTOR('',#11220,10.);
#1046=VECTOR('',#11229,10.);
#1047=VECTOR('',#11232,10.);
#1048=VECTOR('',#11235,10.);
#1049=VECTOR('',#11238,10.);
#1050=VECTOR('',#11241,10.);
#1051=VECTOR('',#11242,10.);
#1052=VECTOR('',#11245,10.);
#1053=VECTOR('',#11260,10.);
#1054=VECTOR('',#11261,10.);
#1055=VECTOR('',#11270,10.);
#1056=VECTOR('',#11273,10.);
#1057=VECTOR('',#11276,10.);
#1058=VECTOR('',#11279,10.);
#1059=VECTOR('',#11282,10.);
#1060=VECTOR('',#11283,10.);
#1061=VECTOR('',#11286,10.);
#1062=VECTOR('',#11301,10.);
#1063=VECTOR('',#11302,10.);
#1064=VECTOR('',#11311,10.);
#1065=VECTOR('',#11314,0.5);
#1066=VECTOR('',#11317,10.);
#1067=VECTOR('',#11320,1.);
#1068=VECTOR('',#11323,10.);
#1069=VECTOR('',#11324,10.);
#1070=VECTOR('',#11327,10.);
#1071=VECTOR('',#11332,10.);
#1072=VECTOR('',#11333,10.);
#1073=VECTOR('',#11336,10.);
#1074=VECTOR('',#11339,10.);
#1075=VECTOR('',#11350,10.);
#1076=VECTOR('',#11353,10.);
#1077=VECTOR('',#11362,10.);
#1078=VECTOR('',#11363,10.);
#1079=VECTOR('',#11374,10.);
#1080=VECTOR('',#11375,10.);
#1081=VECTOR('',#11378,10.);
#1082=VECTOR('',#11379,10.);
#1083=VECTOR('',#11380,10.);
#1084=VECTOR('',#11383,10.);
#1085=VECTOR('',#11388,10.);
#1086=VECTOR('',#11389,10.);
#1087=VECTOR('',#11392,10.);
#1088=VECTOR('',#11395,10.);
#1089=VECTOR('',#11406,10.);
#1090=VECTOR('',#11407,10.);
#1091=VECTOR('',#11418,10.);
#1092=VECTOR('',#11421,10.);
#1093=VECTOR('',#11430,10.);
#1094=VECTOR('',#11431,10.);
#1095=VECTOR('',#11434,10.);
#1096=VECTOR('',#11435,10.);
#1097=VECTOR('',#11436,9.99999999999999);
#1098=VECTOR('',#11439,10.);
#1099=VECTOR('',#11444,10.);
#1100=VECTOR('',#11445,10.);
#1101=VECTOR('',#11448,10.);
#1102=VECTOR('',#11451,10.);
#1103=VECTOR('',#11464,10.);
#1104=VECTOR('',#11467,10.);
#1105=VECTOR('',#11484,10.);
#1106=VECTOR('',#11495,10.);
#1107=VECTOR('',#11498,10.);
#1108=VECTOR('',#11503,10.);
#1109=VECTOR('',#11506,10.);
#1110=VECTOR('',#11507,10.);
#1111=VECTOR('',#11510,10.);
#1112=VECTOR('',#11511,10.);
#1113=VECTOR('',#11512,10.);
#1114=VECTOR('',#11515,10.);
#1115=VECTOR('',#11516,10.);
#1116=VECTOR('',#11517,10.);
#1117=VECTOR('',#11518,10.);
#1118=VECTOR('',#11521,10.);
#1119=VECTOR('',#11522,10.);
#1120=VECTOR('',#11525,10.);
#1121=VECTOR('',#11530,10.);
#1122=VECTOR('',#11533,10.);
#1123=VECTOR('',#11546,10.);
#1124=VECTOR('',#11549,10.);
#1125=VECTOR('',#11576,10.);
#1126=VECTOR('',#11579,10.);
#1127=VECTOR('',#11580,10.);
#1128=VECTOR('',#11583,10.);
#1129=VECTOR('',#11610,10.);
#1130=VECTOR('',#11611,10.);
#1131=VECTOR('',#11612,10.);
#1132=VECTOR('',#11621,10.);
#1133=VECTOR('',#11622,10.);
#1134=VECTOR('',#11627,10.);
#1135=VECTOR('',#11630,10.);
#1136=VECTOR('',#11655,10.);
#1137=VECTOR('',#11656,10.);
#1138=VECTOR('',#11657,10.);
#1139=VECTOR('',#11660,10.);
#1140=VECTOR('',#11661,10.);
#1141=VECTOR('',#11664,10.);
#1142=VECTOR('',#11669,10.);
#1143=VECTOR('',#11670,10.);
#1144=VECTOR('',#11677,10.);
#1145=VECTOR('',#11678,10.);
#1146=VECTOR('',#11681,10.);
#1147=VECTOR('',#11682,10.);
#1148=VECTOR('',#11693,10.);
#1149=VECTOR('',#11694,10.);
#1150=VECTOR('',#11699,10.);
#1151=VECTOR('',#11700,10.);
#1152=VECTOR('',#11705,10.);
#1153=VECTOR('',#11706,10.);
#1154=VECTOR('',#11723,10.);
#1155=VECTOR('',#11732,10.);
#1156=VECTOR('',#11735,10.);
#1157=VECTOR('',#11738,10.);
#1158=VECTOR('',#11741,10.);
#1159=VECTOR('',#11744,10.);
#1160=VECTOR('',#11747,10.);
#1161=VECTOR('',#11750,10.);
#1162=VECTOR('',#11755,10.);
#1163=VECTOR('',#11756,10.);
#1164=VECTOR('',#11761,10.);
#1165=VECTOR('',#11766,10.);
#1166=VECTOR('',#11769,10.);
#1167=VECTOR('',#11772,10.);
#1168=VECTOR('',#11779,10.);
#1169=VECTOR('',#11780,10.);
#1170=VECTOR('',#11809,10.);
#1171=VECTOR('',#11812,10.);
#1172=VECTOR('',#11813,10.);
#1173=VECTOR('',#11816,10.);
#1174=VECTOR('',#11817,10.);
#1175=VECTOR('',#11820,10.);
#1176=VECTOR('',#11823,10.);
#1177=VECTOR('',#11826,10.);
#1178=VECTOR('',#11827,10.);
#1179=VECTOR('',#11836,10.);
#1180=VECTOR('',#11843,10.);
#1181=VECTOR('',#11846,10.);
#1182=VECTOR('',#11849,10.);
#1183=VECTOR('',#11852,10.);
#1184=VECTOR('',#11855,10.);
#1185=VECTOR('',#11858,10.);
#1186=VECTOR('',#11861,10.);
#1187=VECTOR('',#11868,10.);
#1188=VECTOR('',#11869,10.);
#1189=VECTOR('',#11874,10.);
#1190=VECTOR('',#11879,10.);
#1191=VECTOR('',#11884,10.);
#1192=VECTOR('',#11885,10.);
#1193=VECTOR('',#11888,10.);
#1194=VECTOR('',#11889,10.);
#1195=VECTOR('',#11892,10.);
#1196=VECTOR('',#11893,10.);
#1197=VECTOR('',#11900,10.);
#1198=VECTOR('',#11903,10.);
#1199=VECTOR('',#11906,10.);
#1200=VECTOR('',#11907,10.);
#1201=VECTOR('',#11908,10.);
#1202=VECTOR('',#11911,10.);
#1203=VECTOR('',#11912,10.);
#1204=VECTOR('',#11913,10.);
#1205=VECTOR('',#11916,10.);
#1206=VECTOR('',#11917,10.);
#1207=VECTOR('',#11920,10.);
#1208=VECTOR('',#11921,10.);
#1209=VECTOR('',#11924,10.);
#1210=VECTOR('',#11927,10.);
#1211=VECTOR('',#11932,10.);
#1212=VECTOR('',#11935,10.);
#1213=VECTOR('',#11936,10.);
#1214=VECTOR('',#11939,10.);
#1215=VECTOR('',#11940,10.);
#1216=VECTOR('',#11941,10.);
#1217=VECTOR('',#11942,10.);
#1218=VECTOR('',#11945,10.);
#1219=VECTOR('',#11946,10.);
#1220=VECTOR('',#11949,10.);
#1221=VECTOR('',#11950,10.);
#1222=VECTOR('',#11953,10.);
#1223=VECTOR('',#11956,10.);
#1224=VECTOR('',#11967,10.);
#1225=VECTOR('',#11970,10.);
#1226=VECTOR('',#11979,10.);
#1227=VECTOR('',#11980,10.);
#1228=VECTOR('',#11991,10.);
#1229=VECTOR('',#11992,10.);
#1230=VECTOR('',#11995,10.);
#1231=VECTOR('',#11996,10.);
#1232=VECTOR('',#11997,10.);
#1233=VECTOR('',#12000,10.);
#1234=VECTOR('',#12005,10.);
#1235=VECTOR('',#12006,10.);
#1236=VECTOR('',#12009,10.);
#1237=VECTOR('',#12012,10.);
#1238=VECTOR('',#12023,10.);
#1239=VECTOR('',#12024,10.);
#1240=VECTOR('',#12035,10.);
#1241=VECTOR('',#12038,10.);
#1242=VECTOR('',#12047,10.);
#1243=VECTOR('',#12048,10.);
#1244=VECTOR('',#12051,10.);
#1245=VECTOR('',#12052,10.);
#1246=VECTOR('',#12053,9.99999999999999);
#1247=VECTOR('',#12056,10.);
#1248=VECTOR('',#12061,10.);
#1249=VECTOR('',#12062,10.);
#1250=VECTOR('',#12065,10.);
#1251=VECTOR('',#12068,10.);
#1252=VECTOR('',#12081,10.);
#1253=VECTOR('',#12084,10.);
#1254=VECTOR('',#12101,10.);
#1255=VECTOR('',#12112,10.);
#1256=VECTOR('',#12115,10.);
#1257=VECTOR('',#12120,10.);
#1258=VECTOR('',#12123,10.);
#1259=VECTOR('',#12124,10.);
#1260=VECTOR('',#12127,10.);
#1261=VECTOR('',#12128,10.);
#1262=VECTOR('',#12129,10.);
#1263=VECTOR('',#12132,10.);
#1264=VECTOR('',#12133,10.);
#1265=VECTOR('',#12134,10.);
#1266=VECTOR('',#12135,10.);
#1267=VECTOR('',#12138,10.);
#1268=VECTOR('',#12139,10.);
#1269=VECTOR('',#12142,10.);
#1270=VECTOR('',#12147,10.);
#1271=VECTOR('',#12150,10.);
#1272=VECTOR('',#12163,10.);
#1273=VECTOR('',#12166,10.);
#1274=VECTOR('',#12193,10.);
#1275=VECTOR('',#12196,10.);
#1276=VECTOR('',#12197,10.);
#1277=VECTOR('',#12200,10.);
#1278=VECTOR('',#12225,10.);
#1279=VECTOR('',#12226,10.);
#1280=VECTOR('',#12227,10.);
#1281=VECTOR('',#12234,10.);
#1282=VECTOR('',#12239,10.);
#1283=VECTOR('',#12262,10.);
#1284=VECTOR('',#12263,10.);
#1285=VECTOR('',#12264,10.);
#1286=VECTOR('',#12267,10.);
#1287=VECTOR('',#12268,10.);
#1288=VECTOR('',#12271,10.);
#1289=VECTOR('',#12276,10.);
#1290=VECTOR('',#12277,10.);
#1291=VECTOR('',#12284,10.);
#1292=VECTOR('',#12285,10.);
#1293=VECTOR('',#12288,10.);
#1294=VECTOR('',#12289,10.);
#1295=VECTOR('',#12298,10.);
#1296=VECTOR('',#12299,10.);
#1297=VECTOR('',#12304,10.);
#1298=VECTOR('',#12305,10.);
#1299=VECTOR('',#12310,10.);
#1300=VECTOR('',#12311,10.);
#1301=VECTOR('',#12328,10.);
#1302=VECTOR('',#12339,10.);
#1303=VECTOR('',#12342,10.);
#1304=VECTOR('',#12345,10.);
#1305=VECTOR('',#12348,10.);
#1306=VECTOR('',#12351,10.);
#1307=VECTOR('',#12358,10.);
#1308=VECTOR('',#12359,10.);
#1309=VECTOR('',#12364,10.);
#1310=VECTOR('',#12369,10.);
#1311=VECTOR('',#12372,10.);
#1312=VECTOR('',#12381,10.);
#1313=VECTOR('',#12410,10.);
#1314=VECTOR('',#12413,10.);
#1315=VECTOR('',#12414,10.);
#1316=VECTOR('',#12417,10.);
#1317=VECTOR('',#12418,10.);
#1318=VECTOR('',#12421,10.);
#1319=VECTOR('',#12424,10.);
#1320=VECTOR('',#12427,10.);
#1321=VECTOR('',#12428,10.);
#1322=VECTOR('',#12437,10.);
#1323=VECTOR('',#12444,10.);
#1324=VECTOR('',#12447,10.);
#1325=VECTOR('',#12450,10.);
#1326=VECTOR('',#12453,10.);
#1327=VECTOR('',#12454,10.);
#1328=VECTOR('',#12457,10.);
#1329=VECTOR('',#12458,10.);
#1330=VECTOR('',#12461,10.);
#1331=VECTOR('',#12462,10.);
#1332=VECTOR('',#12463,10.);
#1333=VECTOR('',#12466,10.);
#1334=VECTOR('',#12467,10.);
#1335=VECTOR('',#12468,10.);
#1336=VECTOR('',#12471,10.);
#1337=VECTOR('',#12474,10.);
#1338=VECTOR('',#12479,10.);
#1339=VECTOR('',#12486,10.);
#1340=VECTOR('',#12489,10.);
#1341=VECTOR('',#12494,10.);
#1342=VECTOR('',#12495,10.);
#1343=VECTOR('',#12496,10.);
#1344=VECTOR('',#12499,10.);
#1345=VECTOR('',#12506,10.);
#1346=VECTOR('',#12507,10.);
#1347=VECTOR('',#12510,10.);
#1348=VECTOR('',#12513,10.);
#1349=VECTOR('',#12524,10.);
#1350=VECTOR('',#12527,10.);
#1351=VECTOR('',#12536,10.);
#1352=VECTOR('',#12537,10.);
#1353=VECTOR('',#12548,10.);
#1354=VECTOR('',#12549,10.);
#1355=VECTOR('',#12552,10.);
#1356=VECTOR('',#12553,10.);
#1357=VECTOR('',#12554,10.);
#1358=VECTOR('',#12557,10.);
#1359=VECTOR('',#12562,10.);
#1360=VECTOR('',#12563,10.);
#1361=VECTOR('',#12566,10.);
#1362=VECTOR('',#12569,10.);
#1363=VECTOR('',#12580,10.);
#1364=VECTOR('',#12581,10.);
#1365=VECTOR('',#12592,10.);
#1366=VECTOR('',#12595,10.);
#1367=VECTOR('',#12604,10.);
#1368=VECTOR('',#12605,10.);
#1369=VECTOR('',#12608,10.);
#1370=VECTOR('',#12609,10.);
#1371=VECTOR('',#12610,9.99999999999999);
#1372=VECTOR('',#12613,10.);
#1373=VECTOR('',#12618,10.);
#1374=VECTOR('',#12619,10.);
#1375=VECTOR('',#12622,10.);
#1376=VECTOR('',#12625,10.);
#1377=VECTOR('',#12638,10.);
#1378=VECTOR('',#12641,10.);
#1379=VECTOR('',#12658,10.);
#1380=VECTOR('',#12669,10.);
#1381=VECTOR('',#12672,10.);
#1382=VECTOR('',#12677,10.);
#1383=VECTOR('',#12680,10.);
#1384=VECTOR('',#12681,10.);
#1385=VECTOR('',#12684,10.);
#1386=VECTOR('',#12685,10.);
#1387=VECTOR('',#12686,10.);
#1388=VECTOR('',#12689,10.);
#1389=VECTOR('',#12690,10.);
#1390=VECTOR('',#12691,10.);
#1391=VECTOR('',#12692,10.);
#1392=VECTOR('',#12695,10.);
#1393=VECTOR('',#12696,10.);
#1394=VECTOR('',#12699,10.);
#1395=VECTOR('',#12704,10.);
#1396=VECTOR('',#12707,10.);
#1397=VECTOR('',#12720,10.);
#1398=VECTOR('',#12723,10.);
#1399=VECTOR('',#12750,10.);
#1400=VECTOR('',#12753,10.);
#1401=VECTOR('',#12754,10.);
#1402=VECTOR('',#12757,10.);
#1403=VECTOR('',#12784,10.);
#1404=VECTOR('',#12785,10.);
#1405=VECTOR('',#12786,10.);
#1406=VECTOR('',#12795,10.);
#1407=VECTOR('',#12796,10.);
#1408=VECTOR('',#12801,10.);
#1409=VECTOR('',#12804,10.);
#1410=VECTOR('',#12829,10.);
#1411=VECTOR('',#12830,10.);
#1412=VECTOR('',#12831,10.);
#1413=VECTOR('',#12834,10.);
#1414=VECTOR('',#12835,10.);
#1415=VECTOR('',#12838,10.);
#1416=VECTOR('',#12843,10.);
#1417=VECTOR('',#12844,10.);
#1418=VECTOR('',#12851,10.);
#1419=VECTOR('',#12852,10.);
#1420=VECTOR('',#12855,10.);
#1421=VECTOR('',#12856,10.);
#1422=VECTOR('',#12865,10.);
#1423=VECTOR('',#12866,10.);
#1424=VECTOR('',#12871,10.);
#1425=VECTOR('',#12872,10.);
#1426=VECTOR('',#12877,10.);
#1427=VECTOR('',#12878,10.);
#1428=VECTOR('',#12895,10.);
#1429=VECTOR('',#12904,10.);
#1430=VECTOR('',#12907,10.);
#1431=VECTOR('',#12910,10.);
#1432=VECTOR('',#12915,10.);
#1433=VECTOR('',#12918,10.);
#1434=VECTOR('',#12921,10.);
#1435=VECTOR('',#12926,10.);
#1436=VECTOR('',#12927,10.);
#1437=VECTOR('',#12932,10.);
#1438=VECTOR('',#12937,10.);
#1439=VECTOR('',#12940,10.);
#1440=VECTOR('',#12943,10.);
#1441=VECTOR('',#12950,10.);
#1442=VECTOR('',#12951,10.);
#1443=VECTOR('',#12980,10.);
#1444=VECTOR('',#12983,10.);
#1445=VECTOR('',#12984,10.);
#1446=VECTOR('',#12987,10.);
#1447=VECTOR('',#12988,10.);
#1448=VECTOR('',#12991,10.);
#1449=VECTOR('',#12994,10.);
#1450=VECTOR('',#12997,10.);
#1451=VECTOR('',#12998,10.);
#1452=VECTOR('',#13007,10.);
#1453=VECTOR('',#13014,10.);
#1454=VECTOR('',#13017,10.);
#1455=VECTOR('',#13020,10.);
#1456=VECTOR('',#13025,10.);
#1457=VECTOR('',#13030,10.);
#1458=VECTOR('',#13035,10.);
#1459=VECTOR('',#13036,10.);
#1460=VECTOR('',#13041,10.);
#1461=VECTOR('',#13044,10.);
#1462=VECTOR('',#13045,10.);
#1463=VECTOR('',#13050,10.);
#1464=VECTOR('',#13051,10.);
#1465=VECTOR('',#13054,10.);
#1466=VECTOR('',#13057,10.);
#1467=VECTOR('',#13058,10.);
#1468=VECTOR('',#13061,0.990600000000022);
#1469=VECTOR('',#13066,0.990600000000022);
#1470=VECTOR('',#13069,10.);
#1471=VECTOR('',#13070,10.);
#1472=VECTOR('',#13073,10.);
#1473=VECTOR('',#13074,0.990600000000022);
#1474=VECTOR('',#13075,10.);
#1475=VECTOR('',#13076,10.);
#1476=VECTOR('',#13079,10.);
#1477=VECTOR('',#13080,10.);
#1478=VECTOR('',#13083,10.);
#1479=VECTOR('',#13084,10.);
#1480=VECTOR('',#13087,10.);
#1481=VECTOR('',#13090,10.);
#1482=VECTOR('',#13101,10.);
#1483=VECTOR('',#13104,10.);
#1484=VECTOR('',#13113,10.);
#1485=VECTOR('',#13114,10.);
#1486=VECTOR('',#13125,10.);
#1487=VECTOR('',#13126,10.);
#1488=VECTOR('',#13129,10.);
#1489=VECTOR('',#13130,10.);
#1490=VECTOR('',#13131,10.);
#1491=VECTOR('',#13134,10.);
#1492=VECTOR('',#13139,10.);
#1493=VECTOR('',#13140,10.);
#1494=VECTOR('',#13143,10.);
#1495=VECTOR('',#13146,10.);
#1496=VECTOR('',#13157,10.);
#1497=VECTOR('',#13158,10.);
#1498=VECTOR('',#13169,10.);
#1499=VECTOR('',#13172,10.);
#1500=VECTOR('',#13181,10.);
#1501=VECTOR('',#13182,10.);
#1502=VECTOR('',#13185,10.);
#1503=VECTOR('',#13186,10.);
#1504=VECTOR('',#13187,9.99999999999999);
#1505=VECTOR('',#13190,10.);
#1506=VECTOR('',#13195,10.);
#1507=VECTOR('',#13196,10.);
#1508=VECTOR('',#13199,10.);
#1509=VECTOR('',#13202,10.);
#1510=VECTOR('',#13215,10.);
#1511=VECTOR('',#13218,10.);
#1512=VECTOR('',#13235,10.);
#1513=VECTOR('',#13246,10.);
#1514=VECTOR('',#13249,10.);
#1515=VECTOR('',#13254,10.);
#1516=VECTOR('',#13257,10.);
#1517=VECTOR('',#13258,10.);
#1518=VECTOR('',#13261,10.);
#1519=VECTOR('',#13262,10.);
#1520=VECTOR('',#13263,10.);
#1521=VECTOR('',#13266,10.);
#1522=VECTOR('',#13267,10.);
#1523=VECTOR('',#13268,10.);
#1524=VECTOR('',#13269,10.);
#1525=VECTOR('',#13272,10.);
#1526=VECTOR('',#13273,10.);
#1527=VECTOR('',#13276,10.);
#1528=VECTOR('',#13281,10.);
#1529=VECTOR('',#13284,10.);
#1530=VECTOR('',#13297,10.);
#1531=VECTOR('',#13300,10.);
#1532=VECTOR('',#13327,10.);
#1533=VECTOR('',#13330,10.);
#1534=VECTOR('',#13331,10.);
#1535=VECTOR('',#13334,10.);
#1536=VECTOR('',#13359,10.);
#1537=VECTOR('',#13360,10.);
#1538=VECTOR('',#13361,10.);
#1539=VECTOR('',#13368,10.);
#1540=VECTOR('',#13373,10.);
#1541=VECTOR('',#13376,10.);
#1542=VECTOR('',#13397,10.);
#1543=VECTOR('',#13398,10.);
#1544=VECTOR('',#13399,10.);
#1545=VECTOR('',#13402,10.);
#1546=VECTOR('',#13403,10.);
#1547=VECTOR('',#13406,10.);
#1548=VECTOR('',#13411,10.);
#1549=VECTOR('',#13412,10.);
#1550=VECTOR('',#13419,10.);
#1551=VECTOR('',#13420,10.);
#1552=VECTOR('',#13423,10.);
#1553=VECTOR('',#13424,10.);
#1554=VECTOR('',#13431,10.);
#1555=VECTOR('',#13436,10.);
#1556=VECTOR('',#13437,10.);
#1557=VECTOR('',#13442,10.);
#1558=VECTOR('',#13443,10.);
#1559=VECTOR('',#13460,10.);
#1560=VECTOR('',#13471,10.);
#1561=VECTOR('',#13474,10.);
#1562=VECTOR('',#13479,10.);
#1563=VECTOR('',#13482,10.);
#1564=VECTOR('',#13489,10.);
#1565=VECTOR('',#13490,10.);
#1566=VECTOR('',#13495,10.);
#1567=VECTOR('',#13502,10.);
#1568=VECTOR('',#13511,10.);
#1569=VECTOR('',#13512,10.);
#1570=VECTOR('',#13541,10.);
#1571=VECTOR('',#13544,10.);
#1572=VECTOR('',#13545,10.);
#1573=VECTOR('',#13548,10.);
#1574=VECTOR('',#13549,10.);
#1575=VECTOR('',#13552,10.);
#1576=VECTOR('',#13555,10.);
#1577=VECTOR('',#13558,10.);
#1578=VECTOR('',#13559,10.);
#1579=VECTOR('',#13568,10.);
#1580=VECTOR('',#13575,10.);
#1581=VECTOR('',#13578,10.);
#1582=VECTOR('',#13581,10.);
#1583=VECTOR('',#13584,10.);
#1584=VECTOR('',#13587,10.);
#1585=VECTOR('',#13594,10.);
#1586=VECTOR('',#13597,10.);
#1587=VECTOR('',#13602,10.);
#1588=VECTOR('',#13603,10.);
#1589=VECTOR('',#13604,10.);
#1590=VECTOR('',#13607,10.);
#1591=VECTOR('',#13616,23.238);
#1592=VECTOR('',#13625,10.);
#1593=VECTOR('',#13628,10.);
#1594=VECTOR('',#13633,10.);
#1595=VECTOR('',#13638,10.);
#1596=VECTOR('',#13639,10.);
#1597=VECTOR('',#13640,10.);
#1598=VECTOR('',#13641,10.);
#1599=VECTOR('',#13648,10.);
#1600=VECTOR('',#13663,10.);
#1601=VECTOR('',#13664,10.);
#1602=VECTOR('',#13677,10.);
#1603=VECTOR('',#13678,9.99999999999999);
#1604=VECTOR('',#13679,9.99999999999999);
#1605=VECTOR('',#13680,10.);
#1606=VECTOR('',#13685,10.);
#1607=VECTOR('',#13688,10.);
#1608=VECTOR('',#13689,10.);
#1609=VECTOR('',#13690,10.);
#1610=VECTOR('',#13695,23.238);
#1611=VECTOR('',#13708,10.);
#1612=VECTOR('',#13711,10.);
#1613=VECTOR('',#13716,10.);
#1614=VECTOR('',#13727,10.);
#1615=VECTOR('',#13732,10.);
#1616=VECTOR('',#13741,10.);
#1617=VECTOR('',#13748,10.);
#1618=VECTOR('',#13749,10.);
#1619=VECTOR('',#13750,10.);
#1620=VECTOR('',#13757,10.);
#1621=VECTOR('',#13760,10.);
#1622=VECTOR('',#13761,10.);
#1623=VECTOR('',#13768,10.);
#1624=VECTOR('',#13771,10.);
#1625=VECTOR('',#13774,10.);
#1626=VECTOR('',#13777,10.);
#1627=VECTOR('',#13780,10.);
#1628=VECTOR('',#13783,10.);
#1629=VECTOR('',#13788,10.);
#1630=VECTOR('',#13791,10.);
#1631=VECTOR('',#13792,10.);
#1632=VECTOR('',#13805,14.0000002086163);
#1633=VECTOR('',#13812,10.);
#1634=VECTOR('',#13813,10.);
#1635=VECTOR('',#13816,9.99999999999999);
#1636=VECTOR('',#13817,10.);
#1637=VECTOR('',#13822,10.);
#1638=VECTOR('',#13825,10.);
#1639=VECTOR('',#13826,10.);
#1640=VECTOR('',#13833,10.);
#1641=VECTOR('',#13834,10.);
#1642=VECTOR('',#13837,10.);
#1643=VECTOR('',#13838,10.);
#1644=VECTOR('',#13851,10.);
#1645=VECTOR('',#13852,10.);
#1646=VECTOR('',#13855,10.);
#1647=VECTOR('',#13862,10.);
#1648=VECTOR('',#13863,10.);
#1649=VECTOR('',#13864,10.);
#1650=VECTOR('',#13867,10.);
#1651=VECTOR('',#13874,10.);
#1652=VECTOR('',#13875,9.99999999999999);
#1653=VECTOR('',#13876,9.99999999999999);
#1654=VECTOR('',#13879,10.);
#1655=VECTOR('',#13880,10.);
#1656=VECTOR('',#13881,10.);
#1657=VECTOR('',#13882,10.);
#1658=VECTOR('',#13891,14.0000002086163);
#1659=VECTOR('',#13904,10.);
#1660=VECTOR('',#13913,10.);
#1661=VECTOR('',#13924,10.);
#1662=VECTOR('',#13939,10.);
#1663=VECTOR('',#13950,10.);
#1664=VECTOR('',#13951,9.99999999999999);
#1665=VECTOR('',#13954,10.);
#1666=VECTOR('',#13955,10.);
#1667=VECTOR('',#13956,10.);
#1668=VECTOR('',#13963,10.);
#1669=VECTOR('',#13964,10.);
#1670=VECTOR('',#13969,10.);
#1671=VECTOR('',#13972,10.);
#1672=VECTOR('',#13973,10.);
#1673=VECTOR('',#13982,10.);
#1674=VECTOR('',#13985,10.);
#1675=VECTOR('',#13986,10.);
#1676=VECTOR('',#13991,10.);
#1677=VECTOR('',#13994,9.99999999999999);
#1678=VECTOR('',#13995,10.);
#1679=VECTOR('',#13998,10.);
#1680=VECTOR('',#14039,10.);
#1681=VECTOR('',#14042,10.);
#1682=VECTOR('',#14055,10.);
#1683=VECTOR('',#14072,10.);
#1684=VECTOR('',#14081,10.);
#1685=VECTOR('',#14082,9.99999999999999);
#1686=VECTOR('',#14085,10.);
#1687=VECTOR('',#14086,10.);
#1688=VECTOR('',#14089,10.);
#1689=VECTOR('',#14096,10.);
#1690=VECTOR('',#14097,10.);
#1691=VECTOR('',#14102,10.);
#1692=VECTOR('',#14105,10.);
#1693=VECTOR('',#14106,10.);
#1694=VECTOR('',#14113,10.);
#1695=VECTOR('',#14116,10.);
#1696=VECTOR('',#14119,10.);
#1697=VECTOR('',#14122,10.);
#1698=VECTOR('',#14151,10.);
#1699=CYLINDRICAL_SURFACE('',#9991,0.5);
#1700=CYLINDRICAL_SURFACE('',#9996,0.5);
#1701=CYLINDRICAL_SURFACE('',#9998,1.);
#1702=CYLINDRICAL_SURFACE('',#10001,1.);
#1703=CYLINDRICAL_SURFACE('',#10007,0.5);
#1704=CYLINDRICAL_SURFACE('',#10012,0.5);
#1705=CYLINDRICAL_SURFACE('',#10014,1.);
#1706=CYLINDRICAL_SURFACE('',#10017,1.);
#1707=CYLINDRICAL_SURFACE('',#10023,0.5);
#1708=CYLINDRICAL_SURFACE('',#10028,0.5);
#1709=CYLINDRICAL_SURFACE('',#10030,1.);
#1710=CYLINDRICAL_SURFACE('',#10033,1.);
#1711=CYLINDRICAL_SURFACE('',#10039,0.5);
#1712=CYLINDRICAL_SURFACE('',#10044,0.5);
#1713=CYLINDRICAL_SURFACE('',#10046,1.);
#1714=CYLINDRICAL_SURFACE('',#10049,1.);
#1715=CYLINDRICAL_SURFACE('',#10052,0.2);
#1716=CYLINDRICAL_SURFACE('',#10057,0.2);
#1717=CYLINDRICAL_SURFACE('',#10063,0.2);
#1718=CYLINDRICAL_SURFACE('',#10067,0.2);
#1719=CYLINDRICAL_SURFACE('',#10070,1.82880000000002);
#1720=CYLINDRICAL_SURFACE('',#10073,0.2);
#1721=CYLINDRICAL_SURFACE('',#10078,0.2);
#1722=CYLINDRICAL_SURFACE('',#10083,0.2);
#1723=CYLINDRICAL_SURFACE('',#10089,0.2);
#1724=CYLINDRICAL_SURFACE('',#10091,1.82880000000002);
#1725=CYLINDRICAL_SURFACE('',#10094,0.2);
#1726=CYLINDRICAL_SURFACE('',#10101,0.2);
#1727=CYLINDRICAL_SURFACE('',#10109,0.2);
#1728=CYLINDRICAL_SURFACE('',#10114,0.2);
#1729=CYLINDRICAL_SURFACE('',#10116,0.5);
#1730=CYLINDRICAL_SURFACE('',#10123,1.82880000000002);
#1731=CYLINDRICAL_SURFACE('',#10125,0.2);
#1732=CYLINDRICAL_SURFACE('',#10132,0.2);
#1733=CYLINDRICAL_SURFACE('',#10139,0.2);
#1734=CYLINDRICAL_SURFACE('',#10143,0.2);
#1735=CYLINDRICAL_SURFACE('',#10145,0.5);
#1736=CYLINDRICAL_SURFACE('',#10148,1.82880000000002);
#1737=CYLINDRICAL_SURFACE('',#10161,1.);
#1738=CYLINDRICAL_SURFACE('',#10165,1.);
#1739=CYLINDRICAL_SURFACE('',#10166,1.);
#1740=CYLINDRICAL_SURFACE('',#10180,1.);
#1741=CYLINDRICAL_SURFACE('',#10181,1.);
#1742=CYLINDRICAL_SURFACE('',#10182,1.);
#1743=CYLINDRICAL_SURFACE('',#10183,0.5);
#1744=CYLINDRICAL_SURFACE('',#10187,0.5);
#1745=CYLINDRICAL_SURFACE('',#10188,1.);
#1746=CYLINDRICAL_SURFACE('',#10192,1.);
#1747=CYLINDRICAL_SURFACE('',#10195,0.5);
#1748=CYLINDRICAL_SURFACE('',#10196,0.5);
#1749=CYLINDRICAL_SURFACE('',#10203,0.5);
#1750=CYLINDRICAL_SURFACE('',#10209,1.);
#1751=CYLINDRICAL_SURFACE('',#10211,1.);
#1752=CYLINDRICAL_SURFACE('',#10215,1.);
#1753=CYLINDRICAL_SURFACE('',#10217,0.5);
#1754=CYLINDRICAL_SURFACE('',#10221,1.);
#1755=CYLINDRICAL_SURFACE('',#10222,1.);
#1756=CYLINDRICAL_SURFACE('',#10226,1.);
#1757=CYLINDRICAL_SURFACE('',#10239,0.5);
#1758=CYLINDRICAL_SURFACE('',#10240,1.);
#1759=CYLINDRICAL_SURFACE('',#10241,0.5);
#1760=CYLINDRICAL_SURFACE('',#10242,0.5);
#1761=CYLINDRICAL_SURFACE('',#10243,0.5);
#1762=CYLINDRICAL_SURFACE('',#10244,0.5);
#1763=CYLINDRICAL_SURFACE('',#10245,1.);
#1764=CYLINDRICAL_SURFACE('',#10260,10.);
#1765=CYLINDRICAL_SURFACE('',#10279,0.990600000000022);
#1766=CYLINDRICAL_SURFACE('',#10280,0.990600000000022);
#1767=CYLINDRICAL_SURFACE('',#10286,0.2);
#1768=CYLINDRICAL_SURFACE('',#10291,0.2);
#1769=CYLINDRICAL_SURFACE('',#10297,0.2);
#1770=CYLINDRICAL_SURFACE('',#10301,0.2);
#1771=CYLINDRICAL_SURFACE('',#10304,1.82880000000002);
#1772=CYLINDRICAL_SURFACE('',#10307,0.2);
#1773=CYLINDRICAL_SURFACE('',#10312,0.2);
#1774=CYLINDRICAL_SURFACE('',#10317,0.2);
#1775=CYLINDRICAL_SURFACE('',#10323,0.2);
#1776=CYLINDRICAL_SURFACE('',#10325,1.82880000000002);
#1777=CYLINDRICAL_SURFACE('',#10328,0.2);
#1778=CYLINDRICAL_SURFACE('',#10335,0.2);
#1779=CYLINDRICAL_SURFACE('',#10343,0.2);
#1780=CYLINDRICAL_SURFACE('',#10348,0.2);
#1781=CYLINDRICAL_SURFACE('',#10350,0.5);
#1782=CYLINDRICAL_SURFACE('',#10357,1.82880000000002);
#1783=CYLINDRICAL_SURFACE('',#10359,0.2);
#1784=CYLINDRICAL_SURFACE('',#10366,0.2);
#1785=CYLINDRICAL_SURFACE('',#10373,0.2);
#1786=CYLINDRICAL_SURFACE('',#10377,0.2);
#1787=CYLINDRICAL_SURFACE('',#10379,0.5);
#1788=CYLINDRICAL_SURFACE('',#10382,1.82880000000002);
#1789=CYLINDRICAL_SURFACE('',#10394,1.);
#1790=CYLINDRICAL_SURFACE('',#10397,1.);
#1791=CYLINDRICAL_SURFACE('',#10398,1.);
#1792=CYLINDRICAL_SURFACE('',#10410,1.);
#1793=CYLINDRICAL_SURFACE('',#10411,1.);
#1794=CYLINDRICAL_SURFACE('',#10412,1.);
#1795=CYLINDRICAL_SURFACE('',#10413,0.5);
#1796=CYLINDRICAL_SURFACE('',#10417,0.5);
#1797=CYLINDRICAL_SURFACE('',#10418,1.);
#1798=CYLINDRICAL_SURFACE('',#10421,1.);
#1799=CYLINDRICAL_SURFACE('',#10424,0.5);
#1800=CYLINDRICAL_SURFACE('',#10425,0.5);
#1801=CYLINDRICAL_SURFACE('',#10432,0.5);
#1802=CYLINDRICAL_SURFACE('',#10438,1.);
#1803=CYLINDRICAL_SURFACE('',#10440,1.);
#1804=CYLINDRICAL_SURFACE('',#10444,1.);
#1805=CYLINDRICAL_SURFACE('',#10446,0.5);
#1806=CYLINDRICAL_SURFACE('',#10450,1.);
#1807=CYLINDRICAL_SURFACE('',#10451,1.);
#1808=CYLINDRICAL_SURFACE('',#10455,1.);
#1809=CYLINDRICAL_SURFACE('',#10468,0.5);
#1810=CYLINDRICAL_SURFACE('',#10469,1.);
#1811=CYLINDRICAL_SURFACE('',#10470,0.5);
#1812=CYLINDRICAL_SURFACE('',#10471,0.5);
#1813=CYLINDRICAL_SURFACE('',#10472,0.5);
#1814=CYLINDRICAL_SURFACE('',#10473,0.5);
#1815=CYLINDRICAL_SURFACE('',#10474,1.);
#1816=CYLINDRICAL_SURFACE('',#10492,0.990600000000022);
#1817=CYLINDRICAL_SURFACE('',#10494,0.45720000006189);
#1818=CYLINDRICAL_SURFACE('',#10498,0.457200000004114);
#1819=CYLINDRICAL_SURFACE('',#10502,0.2);
#1820=CYLINDRICAL_SURFACE('',#10507,0.2);
#1821=CYLINDRICAL_SURFACE('',#10513,0.2);
#1822=CYLINDRICAL_SURFACE('',#10517,0.2);
#1823=CYLINDRICAL_SURFACE('',#10520,1.82880000000002);
#1824=CYLINDRICAL_SURFACE('',#10523,0.2);
#1825=CYLINDRICAL_SURFACE('',#10528,0.2);
#1826=CYLINDRICAL_SURFACE('',#10533,0.2);
#1827=CYLINDRICAL_SURFACE('',#10539,0.2);
#1828=CYLINDRICAL_SURFACE('',#10541,1.82880000000002);
#1829=CYLINDRICAL_SURFACE('',#10544,0.2);
#1830=CYLINDRICAL_SURFACE('',#10551,0.2);
#1831=CYLINDRICAL_SURFACE('',#10559,0.2);
#1832=CYLINDRICAL_SURFACE('',#10564,0.2);
#1833=CYLINDRICAL_SURFACE('',#10566,0.5);
#1834=CYLINDRICAL_SURFACE('',#10573,1.82880000000002);
#1835=CYLINDRICAL_SURFACE('',#10575,0.2);
#1836=CYLINDRICAL_SURFACE('',#10582,0.2);
#1837=CYLINDRICAL_SURFACE('',#10589,0.2);
#1838=CYLINDRICAL_SURFACE('',#10593,0.2);
#1839=CYLINDRICAL_SURFACE('',#10595,0.5);
#1840=CYLINDRICAL_SURFACE('',#10598,1.82880000000002);
#1841=CYLINDRICAL_SURFACE('',#10611,1.);
#1842=CYLINDRICAL_SURFACE('',#10615,1.);
#1843=CYLINDRICAL_SURFACE('',#10616,1.);
#1844=CYLINDRICAL_SURFACE('',#10630,1.);
#1845=CYLINDRICAL_SURFACE('',#10631,1.);
#1846=CYLINDRICAL_SURFACE('',#10632,1.);
#1847=CYLINDRICAL_SURFACE('',#10633,0.5);
#1848=CYLINDRICAL_SURFACE('',#10637,0.5);
#1849=CYLINDRICAL_SURFACE('',#10638,1.);
#1850=CYLINDRICAL_SURFACE('',#10642,1.);
#1851=CYLINDRICAL_SURFACE('',#10644,0.5);
#1852=CYLINDRICAL_SURFACE('',#10645,0.5);
#1853=CYLINDRICAL_SURFACE('',#10652,0.5);
#1854=CYLINDRICAL_SURFACE('',#10658,1.);
#1855=CYLINDRICAL_SURFACE('',#10660,1.);
#1856=CYLINDRICAL_SURFACE('',#10664,1.);
#1857=CYLINDRICAL_SURFACE('',#10666,0.5);
#1858=CYLINDRICAL_SURFACE('',#10670,1.);
#1859=CYLINDRICAL_SURFACE('',#10671,1.);
#1860=CYLINDRICAL_SURFACE('',#10675,1.);
#1861=CYLINDRICAL_SURFACE('',#10688,0.5);
#1862=CYLINDRICAL_SURFACE('',#10689,1.);
#1863=CYLINDRICAL_SURFACE('',#10690,0.5);
#1864=CYLINDRICAL_SURFACE('',#10691,0.5);
#1865=CYLINDRICAL_SURFACE('',#10692,0.5);
#1866=CYLINDRICAL_SURFACE('',#10693,0.5);
#1867=CYLINDRICAL_SURFACE('',#10694,1.);
#1868=CYLINDRICAL_SURFACE('',#10704,10.);
#1869=CYLINDRICAL_SURFACE('',#10717,0.990600000000022);
#1870=CYLINDRICAL_SURFACE('',#10719,0.990600000000022);
#1871=CYLINDRICAL_SURFACE('',#10724,0.2);
#1872=CYLINDRICAL_SURFACE('',#10729,0.2);
#1873=CYLINDRICAL_SURFACE('',#10735,0.2);
#1874=CYLINDRICAL_SURFACE('',#10739,0.2);
#1875=CYLINDRICAL_SURFACE('',#10742,1.82880000000002);
#1876=CYLINDRICAL_SURFACE('',#10745,0.2);
#1877=CYLINDRICAL_SURFACE('',#10750,0.2);
#1878=CYLINDRICAL_SURFACE('',#10755,0.2);
#1879=CYLINDRICAL_SURFACE('',#10761,0.2);
#1880=CYLINDRICAL_SURFACE('',#10763,1.82880000000002);
#1881=CYLINDRICAL_SURFACE('',#10766,0.2);
#1882=CYLINDRICAL_SURFACE('',#10773,0.2);
#1883=CYLINDRICAL_SURFACE('',#10781,0.2);
#1884=CYLINDRICAL_SURFACE('',#10786,0.2);
#1885=CYLINDRICAL_SURFACE('',#10788,0.5);
#1886=CYLINDRICAL_SURFACE('',#10795,1.82880000000002);
#1887=CYLINDRICAL_SURFACE('',#10797,0.2);
#1888=CYLINDRICAL_SURFACE('',#10804,0.2);
#1889=CYLINDRICAL_SURFACE('',#10811,0.2);
#1890=CYLINDRICAL_SURFACE('',#10815,0.2);
#1891=CYLINDRICAL_SURFACE('',#10817,0.5);
#1892=CYLINDRICAL_SURFACE('',#10820,1.82880000000002);
#1893=CYLINDRICAL_SURFACE('',#10832,1.);
#1894=CYLINDRICAL_SURFACE('',#10835,1.);
#1895=CYLINDRICAL_SURFACE('',#10836,1.);
#1896=CYLINDRICAL_SURFACE('',#10848,1.);
#1897=CYLINDRICAL_SURFACE('',#10849,1.);
#1898=CYLINDRICAL_SURFACE('',#10850,1.);
#1899=CYLINDRICAL_SURFACE('',#10851,0.5);
#1900=CYLINDRICAL_SURFACE('',#10855,0.5);
#1901=CYLINDRICAL_SURFACE('',#10856,1.);
#1902=CYLINDRICAL_SURFACE('',#10859,1.);
#1903=CYLINDRICAL_SURFACE('',#10861,0.5);
#1904=CYLINDRICAL_SURFACE('',#10862,0.5);
#1905=CYLINDRICAL_SURFACE('',#10869,0.5);
#1906=CYLINDRICAL_SURFACE('',#10875,1.);
#1907=CYLINDRICAL_SURFACE('',#10877,1.);
#1908=CYLINDRICAL_SURFACE('',#10881,1.);
#1909=CYLINDRICAL_SURFACE('',#10883,0.5);
#1910=CYLINDRICAL_SURFACE('',#10887,1.);
#1911=CYLINDRICAL_SURFACE('',#10888,1.);
#1912=CYLINDRICAL_SURFACE('',#10892,1.);
#1913=CYLINDRICAL_SURFACE('',#10905,0.5);
#1914=CYLINDRICAL_SURFACE('',#10906,1.);
#1915=CYLINDRICAL_SURFACE('',#10907,0.5);
#1916=CYLINDRICAL_SURFACE('',#10908,0.5);
#1917=CYLINDRICAL_SURFACE('',#10909,0.5);
#1918=CYLINDRICAL_SURFACE('',#10910,0.5);
#1919=CYLINDRICAL_SURFACE('',#10911,1.);
#1920=CYLINDRICAL_SURFACE('',#10923,0.990600000000022);
#1921=CYLINDRICAL_SURFACE('',#10925,0.45720000006189);
#1922=CYLINDRICAL_SURFACE('',#10929,0.457200000004114);
#1923=CYLINDRICAL_SURFACE('',#10932,23.238);
#1924=CYLINDRICAL_SURFACE('',#10937,6.49999999999998);
#1925=CYLINDRICAL_SURFACE('',#10951,13.2018786973905);
#1926=CYLINDRICAL_SURFACE('',#10962,23.238);
#1927=CYLINDRICAL_SURFACE('',#10992,10.);
#1928=CYLINDRICAL_SURFACE('',#11012,0.457200001058969);
#1929=CYLINDRICAL_SURFACE('',#11015,0.457200000012143);
#1930=CYLINDRICAL_SURFACE('',#11021,6.49999999999998);
#1931=CYLINDRICAL_SURFACE('',#11025,0.457200000012143);
#1932=CYLINDRICAL_SURFACE('',#11029,0.457200001058969);
#1933=CYLINDRICAL_SURFACE('',#11052,9.67127869740604);
#1934=CYLINDRICAL_SURFACE('',#11059,13.2018786973905);
#1935=CYLINDRICAL_SURFACE('',#11066,0.990600000000022);
#1936=CYLINDRICAL_SURFACE('',#11069,0.45720000006189);
#1937=CYLINDRICAL_SURFACE('',#11072,0.457200000004114);
#1938=CYLINDRICAL_SURFACE('',#11074,0.457200000012143);
#1939=CYLINDRICAL_SURFACE('',#11077,0.457200001058969);
#1940=CYLINDRICAL_SURFACE('',#11089,9.67127869740604);
#1941=CYLINDRICAL_SURFACE('',#11094,13.2018786973905);
#1942=CYLINDRICAL_SURFACE('',#11107,9.67127869740604);
#1943=CYLINDRICAL_SURFACE('',#11114,13.2018786973905);
#1944=CYLINDRICAL_SURFACE('',#11121,0.990600000000022);
#1945=CYLINDRICAL_SURFACE('',#11125,0.45720000006189);
#1946=CYLINDRICAL_SURFACE('',#11128,0.457200000004114);
#1947=CYLINDRICAL_SURFACE('',#11130,0.457200000012143);
#1948=CYLINDRICAL_SURFACE('',#11132,0.457200001058969);
#1949=CYLINDRICAL_SURFACE('',#11140,9.67127869740604);
#1950=CYLINDRICAL_SURFACE('',#11151,10.);
#1951=CYLINDRICAL_SURFACE('',#11153,6.49999999999998);
#1952=CYLINDRICAL_SURFACE('',#11156,6.49999999999998);
#1953=FACE_OUTER_BOUND('',#2568,.T.);
#1954=FACE_OUTER_BOUND('',#2569,.T.);
#1955=FACE_OUTER_BOUND('',#2570,.T.);
#1956=FACE_OUTER_BOUND('',#2571,.T.);
#1957=FACE_OUTER_BOUND('',#2572,.T.);
#1958=FACE_OUTER_BOUND('',#2573,.T.);
#1959=FACE_OUTER_BOUND('',#2574,.T.);
#1960=FACE_OUTER_BOUND('',#2575,.T.);
#1961=FACE_OUTER_BOUND('',#2576,.T.);
#1962=FACE_OUTER_BOUND('',#2577,.T.);
#1963=FACE_OUTER_BOUND('',#2578,.T.);
#1964=FACE_OUTER_BOUND('',#2579,.T.);
#1965=FACE_OUTER_BOUND('',#2580,.T.);
#1966=FACE_OUTER_BOUND('',#2581,.T.);
#1967=FACE_OUTER_BOUND('',#2582,.T.);
#1968=FACE_OUTER_BOUND('',#2583,.T.);
#1969=FACE_OUTER_BOUND('',#2584,.T.);
#1970=FACE_OUTER_BOUND('',#2585,.T.);
#1971=FACE_OUTER_BOUND('',#2586,.T.);
#1972=FACE_OUTER_BOUND('',#2587,.T.);
#1973=FACE_OUTER_BOUND('',#2588,.T.);
#1974=FACE_OUTER_BOUND('',#2589,.T.);
#1975=FACE_OUTER_BOUND('',#2590,.T.);
#1976=FACE_OUTER_BOUND('',#2591,.T.);
#1977=FACE_OUTER_BOUND('',#2592,.T.);
#1978=FACE_OUTER_BOUND('',#2593,.T.);
#1979=FACE_OUTER_BOUND('',#2594,.T.);
#1980=FACE_OUTER_BOUND('',#2595,.T.);
#1981=FACE_OUTER_BOUND('',#2596,.T.);
#1982=FACE_OUTER_BOUND('',#2597,.T.);
#1983=FACE_OUTER_BOUND('',#2598,.T.);
#1984=FACE_OUTER_BOUND('',#2599,.T.);
#1985=FACE_OUTER_BOUND('',#2600,.T.);
#1986=FACE_OUTER_BOUND('',#2601,.T.);
#1987=FACE_OUTER_BOUND('',#2602,.T.);
#1988=FACE_OUTER_BOUND('',#2603,.T.);
#1989=FACE_OUTER_BOUND('',#2604,.T.);
#1990=FACE_OUTER_BOUND('',#2605,.T.);
#1991=FACE_OUTER_BOUND('',#2606,.T.);
#1992=FACE_OUTER_BOUND('',#2607,.T.);
#1993=FACE_OUTER_BOUND('',#2608,.T.);
#1994=FACE_OUTER_BOUND('',#2609,.T.);
#1995=FACE_OUTER_BOUND('',#2610,.T.);
#1996=FACE_OUTER_BOUND('',#2611,.T.);
#1997=FACE_OUTER_BOUND('',#2612,.T.);
#1998=FACE_OUTER_BOUND('',#2613,.T.);
#1999=FACE_OUTER_BOUND('',#2614,.T.);
#2000=FACE_OUTER_BOUND('',#2615,.T.);
#2001=FACE_OUTER_BOUND('',#2616,.T.);
#2002=FACE_OUTER_BOUND('',#2617,.T.);
#2003=FACE_OUTER_BOUND('',#2618,.T.);
#2004=FACE_OUTER_BOUND('',#2619,.T.);
#2005=FACE_OUTER_BOUND('',#2620,.T.);
#2006=FACE_OUTER_BOUND('',#2621,.T.);
#2007=FACE_OUTER_BOUND('',#2622,.T.);
#2008=FACE_OUTER_BOUND('',#2623,.T.);
#2009=FACE_OUTER_BOUND('',#2624,.T.);
#2010=FACE_OUTER_BOUND('',#2625,.T.);
#2011=FACE_OUTER_BOUND('',#2626,.T.);
#2012=FACE_OUTER_BOUND('',#2627,.T.);
#2013=FACE_OUTER_BOUND('',#2628,.T.);
#2014=FACE_OUTER_BOUND('',#2629,.T.);
#2015=FACE_OUTER_BOUND('',#2630,.T.);
#2016=FACE_OUTER_BOUND('',#2631,.T.);
#2017=FACE_OUTER_BOUND('',#2632,.T.);
#2018=FACE_OUTER_BOUND('',#2633,.T.);
#2019=FACE_OUTER_BOUND('',#2634,.T.);
#2020=FACE_OUTER_BOUND('',#2635,.T.);
#2021=FACE_OUTER_BOUND('',#2636,.T.);
#2022=FACE_OUTER_BOUND('',#2637,.T.);
#2023=FACE_OUTER_BOUND('',#2638,.T.);
#2024=FACE_OUTER_BOUND('',#2639,.T.);
#2025=FACE_OUTER_BOUND('',#2640,.T.);
#2026=FACE_OUTER_BOUND('',#2641,.T.);
#2027=FACE_OUTER_BOUND('',#2642,.T.);
#2028=FACE_OUTER_BOUND('',#2643,.T.);
#2029=FACE_OUTER_BOUND('',#2644,.T.);
#2030=FACE_OUTER_BOUND('',#2645,.T.);
#2031=FACE_OUTER_BOUND('',#2646,.T.);
#2032=FACE_OUTER_BOUND('',#2647,.T.);
#2033=FACE_OUTER_BOUND('',#2648,.T.);
#2034=FACE_OUTER_BOUND('',#2649,.T.);
#2035=FACE_OUTER_BOUND('',#2650,.T.);
#2036=FACE_OUTER_BOUND('',#2651,.T.);
#2037=FACE_OUTER_BOUND('',#2652,.T.);
#2038=FACE_OUTER_BOUND('',#2653,.T.);
#2039=FACE_OUTER_BOUND('',#2654,.T.);
#2040=FACE_OUTER_BOUND('',#2655,.T.);
#2041=FACE_OUTER_BOUND('',#2656,.T.);
#2042=FACE_OUTER_BOUND('',#2657,.T.);
#2043=FACE_OUTER_BOUND('',#2658,.T.);
#2044=FACE_OUTER_BOUND('',#2659,.T.);
#2045=FACE_OUTER_BOUND('',#2660,.T.);
#2046=FACE_OUTER_BOUND('',#2661,.T.);
#2047=FACE_OUTER_BOUND('',#2662,.T.);
#2048=FACE_OUTER_BOUND('',#2663,.T.);
#2049=FACE_OUTER_BOUND('',#2664,.T.);
#2050=FACE_OUTER_BOUND('',#2665,.T.);
#2051=FACE_OUTER_BOUND('',#2666,.T.);
#2052=FACE_OUTER_BOUND('',#2667,.T.);
#2053=FACE_OUTER_BOUND('',#2668,.T.);
#2054=FACE_OUTER_BOUND('',#2669,.T.);
#2055=FACE_OUTER_BOUND('',#2670,.T.);
#2056=FACE_OUTER_BOUND('',#2671,.T.);
#2057=FACE_OUTER_BOUND('',#2672,.T.);
#2058=FACE_OUTER_BOUND('',#2673,.T.);
#2059=FACE_OUTER_BOUND('',#2674,.T.);
#2060=FACE_OUTER_BOUND('',#2675,.T.);
#2061=FACE_OUTER_BOUND('',#2676,.T.);
#2062=FACE_OUTER_BOUND('',#2677,.T.);
#2063=FACE_OUTER_BOUND('',#2678,.T.);
#2064=FACE_OUTER_BOUND('',#2679,.T.);
#2065=FACE_OUTER_BOUND('',#2680,.T.);
#2066=FACE_OUTER_BOUND('',#2681,.T.);
#2067=FACE_OUTER_BOUND('',#2682,.T.);
#2068=FACE_OUTER_BOUND('',#2683,.T.);
#2069=FACE_OUTER_BOUND('',#2684,.T.);
#2070=FACE_OUTER_BOUND('',#2685,.T.);
#2071=FACE_OUTER_BOUND('',#2686,.T.);
#2072=FACE_OUTER_BOUND('',#2687,.T.);
#2073=FACE_OUTER_BOUND('',#2688,.T.);
#2074=FACE_OUTER_BOUND('',#2689,.T.);
#2075=FACE_OUTER_BOUND('',#2690,.T.);
#2076=FACE_OUTER_BOUND('',#2691,.T.);
#2077=FACE_OUTER_BOUND('',#2692,.T.);
#2078=FACE_OUTER_BOUND('',#2693,.T.);
#2079=FACE_OUTER_BOUND('',#2694,.T.);
#2080=FACE_OUTER_BOUND('',#2695,.T.);
#2081=FACE_OUTER_BOUND('',#2696,.T.);
#2082=FACE_OUTER_BOUND('',#2697,.T.);
#2083=FACE_OUTER_BOUND('',#2698,.T.);
#2084=FACE_OUTER_BOUND('',#2699,.T.);
#2085=FACE_OUTER_BOUND('',#2700,.T.);
#2086=FACE_OUTER_BOUND('',#2701,.T.);
#2087=FACE_OUTER_BOUND('',#2704,.T.);
#2088=FACE_OUTER_BOUND('',#2705,.T.);
#2089=FACE_OUTER_BOUND('',#2706,.T.);
#2090=FACE_OUTER_BOUND('',#2707,.T.);
#2091=FACE_OUTER_BOUND('',#2708,.T.);
#2092=FACE_OUTER_BOUND('',#2709,.T.);
#2093=FACE_OUTER_BOUND('',#2710,.T.);
#2094=FACE_OUTER_BOUND('',#2711,.T.);
#2095=FACE_OUTER_BOUND('',#2712,.T.);
#2096=FACE_OUTER_BOUND('',#2713,.T.);
#2097=FACE_OUTER_BOUND('',#2714,.T.);
#2098=FACE_OUTER_BOUND('',#2715,.T.);
#2099=FACE_OUTER_BOUND('',#2716,.T.);
#2100=FACE_OUTER_BOUND('',#2717,.T.);
#2101=FACE_OUTER_BOUND('',#2718,.T.);
#2102=FACE_OUTER_BOUND('',#2719,.T.);
#2103=FACE_OUTER_BOUND('',#2720,.T.);
#2104=FACE_OUTER_BOUND('',#2721,.T.);
#2105=FACE_OUTER_BOUND('',#2722,.T.);
#2106=FACE_OUTER_BOUND('',#2723,.T.);
#2107=FACE_OUTER_BOUND('',#2724,.T.);
#2108=FACE_OUTER_BOUND('',#2725,.T.);
#2109=FACE_OUTER_BOUND('',#2726,.T.);
#2110=FACE_OUTER_BOUND('',#2727,.T.);
#2111=FACE_OUTER_BOUND('',#2728,.T.);
#2112=FACE_OUTER_BOUND('',#2729,.T.);
#2113=FACE_OUTER_BOUND('',#2730,.T.);
#2114=FACE_OUTER_BOUND('',#2731,.T.);
#2115=FACE_OUTER_BOUND('',#2732,.T.);
#2116=FACE_OUTER_BOUND('',#2733,.T.);
#2117=FACE_OUTER_BOUND('',#2734,.T.);
#2118=FACE_OUTER_BOUND('',#2735,.T.);
#2119=FACE_OUTER_BOUND('',#2736,.T.);
#2120=FACE_OUTER_BOUND('',#2737,.T.);
#2121=FACE_OUTER_BOUND('',#2738,.T.);
#2122=FACE_OUTER_BOUND('',#2739,.T.);
#2123=FACE_OUTER_BOUND('',#2740,.T.);
#2124=FACE_OUTER_BOUND('',#2741,.T.);
#2125=FACE_OUTER_BOUND('',#2742,.T.);
#2126=FACE_OUTER_BOUND('',#2743,.T.);
#2127=FACE_OUTER_BOUND('',#2744,.T.);
#2128=FACE_OUTER_BOUND('',#2745,.T.);
#2129=FACE_OUTER_BOUND('',#2746,.T.);
#2130=FACE_OUTER_BOUND('',#2747,.T.);
#2131=FACE_OUTER_BOUND('',#2748,.T.);
#2132=FACE_OUTER_BOUND('',#2749,.T.);
#2133=FACE_OUTER_BOUND('',#2750,.T.);
#2134=FACE_OUTER_BOUND('',#2751,.T.);
#2135=FACE_OUTER_BOUND('',#2752,.T.);
#2136=FACE_OUTER_BOUND('',#2753,.T.);
#2137=FACE_OUTER_BOUND('',#2754,.T.);
#2138=FACE_OUTER_BOUND('',#2755,.T.);
#2139=FACE_OUTER_BOUND('',#2756,.T.);
#2140=FACE_OUTER_BOUND('',#2757,.T.);
#2141=FACE_OUTER_BOUND('',#2758,.T.);
#2142=FACE_OUTER_BOUND('',#2759,.T.);
#2143=FACE_OUTER_BOUND('',#2760,.T.);
#2144=FACE_OUTER_BOUND('',#2761,.T.);
#2145=FACE_OUTER_BOUND('',#2762,.T.);
#2146=FACE_OUTER_BOUND('',#2763,.T.);
#2147=FACE_OUTER_BOUND('',#2764,.T.);
#2148=FACE_OUTER_BOUND('',#2765,.T.);
#2149=FACE_OUTER_BOUND('',#2766,.T.);
#2150=FACE_OUTER_BOUND('',#2767,.T.);
#2151=FACE_OUTER_BOUND('',#2768,.T.);
#2152=FACE_OUTER_BOUND('',#2769,.T.);
#2153=FACE_OUTER_BOUND('',#2770,.T.);
#2154=FACE_OUTER_BOUND('',#2771,.T.);
#2155=FACE_OUTER_BOUND('',#2772,.T.);
#2156=FACE_OUTER_BOUND('',#2773,.T.);
#2157=FACE_OUTER_BOUND('',#2774,.T.);
#2158=FACE_OUTER_BOUND('',#2775,.T.);
#2159=FACE_OUTER_BOUND('',#2776,.T.);
#2160=FACE_OUTER_BOUND('',#2777,.T.);
#2161=FACE_OUTER_BOUND('',#2778,.T.);
#2162=FACE_OUTER_BOUND('',#2779,.T.);
#2163=FACE_OUTER_BOUND('',#2780,.T.);
#2164=FACE_OUTER_BOUND('',#2781,.T.);
#2165=FACE_OUTER_BOUND('',#2782,.T.);
#2166=FACE_OUTER_BOUND('',#2783,.T.);
#2167=FACE_OUTER_BOUND('',#2784,.T.);
#2168=FACE_OUTER_BOUND('',#2785,.T.);
#2169=FACE_OUTER_BOUND('',#2786,.T.);
#2170=FACE_OUTER_BOUND('',#2787,.T.);
#2171=FACE_OUTER_BOUND('',#2788,.T.);
#2172=FACE_OUTER_BOUND('',#2789,.T.);
#2173=FACE_OUTER_BOUND('',#2790,.T.);
#2174=FACE_OUTER_BOUND('',#2791,.T.);
#2175=FACE_OUTER_BOUND('',#2792,.T.);
#2176=FACE_OUTER_BOUND('',#2793,.T.);
#2177=FACE_OUTER_BOUND('',#2794,.T.);
#2178=FACE_OUTER_BOUND('',#2795,.T.);
#2179=FACE_OUTER_BOUND('',#2796,.T.);
#2180=FACE_OUTER_BOUND('',#2797,.T.);
#2181=FACE_OUTER_BOUND('',#2798,.T.);
#2182=FACE_OUTER_BOUND('',#2799,.T.);
#2183=FACE_OUTER_BOUND('',#2800,.T.);
#2184=FACE_OUTER_BOUND('',#2801,.T.);
#2185=FACE_OUTER_BOUND('',#2802,.T.);
#2186=FACE_OUTER_BOUND('',#2803,.T.);
#2187=FACE_OUTER_BOUND('',#2804,.T.);
#2188=FACE_OUTER_BOUND('',#2805,.T.);
#2189=FACE_OUTER_BOUND('',#2806,.T.);
#2190=FACE_OUTER_BOUND('',#2807,.T.);
#2191=FACE_OUTER_BOUND('',#2808,.T.);
#2192=FACE_OUTER_BOUND('',#2809,.T.);
#2193=FACE_OUTER_BOUND('',#2810,.T.);
#2194=FACE_OUTER_BOUND('',#2811,.T.);
#2195=FACE_OUTER_BOUND('',#2812,.T.);
#2196=FACE_OUTER_BOUND('',#2813,.T.);
#2197=FACE_OUTER_BOUND('',#2814,.T.);
#2198=FACE_OUTER_BOUND('',#2815,.T.);
#2199=FACE_OUTER_BOUND('',#2816,.T.);
#2200=FACE_OUTER_BOUND('',#2817,.T.);
#2201=FACE_OUTER_BOUND('',#2818,.T.);
#2202=FACE_OUTER_BOUND('',#2819,.T.);
#2203=FACE_OUTER_BOUND('',#2820,.T.);
#2204=FACE_OUTER_BOUND('',#2821,.T.);
#2205=FACE_OUTER_BOUND('',#2822,.T.);
#2206=FACE_OUTER_BOUND('',#2823,.T.);
#2207=FACE_OUTER_BOUND('',#2824,.T.);
#2208=FACE_OUTER_BOUND('',#2825,.T.);
#2209=FACE_OUTER_BOUND('',#2826,.T.);
#2210=FACE_OUTER_BOUND('',#2827,.T.);
#2211=FACE_OUTER_BOUND('',#2828,.T.);
#2212=FACE_OUTER_BOUND('',#2829,.T.);
#2213=FACE_OUTER_BOUND('',#2830,.T.);
#2214=FACE_OUTER_BOUND('',#2831,.T.);
#2215=FACE_OUTER_BOUND('',#2832,.T.);
#2216=FACE_OUTER_BOUND('',#2833,.T.);
#2217=FACE_OUTER_BOUND('',#2834,.T.);
#2218=FACE_OUTER_BOUND('',#2835,.T.);
#2219=FACE_OUTER_BOUND('',#2836,.T.);
#2220=FACE_OUTER_BOUND('',#2837,.T.);
#2221=FACE_OUTER_BOUND('',#2838,.T.);
#2222=FACE_OUTER_BOUND('',#2839,.T.);
#2223=FACE_OUTER_BOUND('',#2840,.T.);
#2224=FACE_OUTER_BOUND('',#2841,.T.);
#2225=FACE_OUTER_BOUND('',#2842,.T.);
#2226=FACE_OUTER_BOUND('',#2843,.T.);
#2227=FACE_OUTER_BOUND('',#2844,.T.);
#2228=FACE_OUTER_BOUND('',#2845,.T.);
#2229=FACE_OUTER_BOUND('',#2846,.T.);
#2230=FACE_OUTER_BOUND('',#2847,.T.);
#2231=FACE_OUTER_BOUND('',#2848,.T.);
#2232=FACE_OUTER_BOUND('',#2849,.T.);
#2233=FACE_OUTER_BOUND('',#2850,.T.);
#2234=FACE_OUTER_BOUND('',#2851,.T.);
#2235=FACE_OUTER_BOUND('',#2852,.T.);
#2236=FACE_OUTER_BOUND('',#2853,.T.);
#2237=FACE_OUTER_BOUND('',#2854,.T.);
#2238=FACE_OUTER_BOUND('',#2855,.T.);
#2239=FACE_OUTER_BOUND('',#2856,.T.);
#2240=FACE_OUTER_BOUND('',#2857,.T.);
#2241=FACE_OUTER_BOUND('',#2858,.T.);
#2242=FACE_OUTER_BOUND('',#2859,.T.);
#2243=FACE_OUTER_BOUND('',#2860,.T.);
#2244=FACE_OUTER_BOUND('',#2861,.T.);
#2245=FACE_OUTER_BOUND('',#2862,.T.);
#2246=FACE_OUTER_BOUND('',#2863,.T.);
#2247=FACE_OUTER_BOUND('',#2864,.T.);
#2248=FACE_OUTER_BOUND('',#2865,.T.);
#2249=FACE_OUTER_BOUND('',#2866,.T.);
#2250=FACE_OUTER_BOUND('',#2867,.T.);
#2251=FACE_OUTER_BOUND('',#2868,.T.);
#2252=FACE_OUTER_BOUND('',#2869,.T.);
#2253=FACE_OUTER_BOUND('',#2870,.T.);
#2254=FACE_OUTER_BOUND('',#2871,.T.);
#2255=FACE_OUTER_BOUND('',#2872,.T.);
#2256=FACE_OUTER_BOUND('',#2873,.T.);
#2257=FACE_OUTER_BOUND('',#2874,.T.);
#2258=FACE_OUTER_BOUND('',#2875,.T.);
#2259=FACE_OUTER_BOUND('',#2876,.T.);
#2260=FACE_OUTER_BOUND('',#2877,.T.);
#2261=FACE_OUTER_BOUND('',#2878,.T.);
#2262=FACE_OUTER_BOUND('',#2879,.T.);
#2263=FACE_OUTER_BOUND('',#2880,.T.);
#2264=FACE_OUTER_BOUND('',#2881,.T.);
#2265=FACE_OUTER_BOUND('',#2882,.T.);
#2266=FACE_OUTER_BOUND('',#2883,.T.);
#2267=FACE_OUTER_BOUND('',#2884,.T.);
#2268=FACE_OUTER_BOUND('',#2885,.T.);
#2269=FACE_OUTER_BOUND('',#2886,.T.);
#2270=FACE_OUTER_BOUND('',#2887,.T.);
#2271=FACE_OUTER_BOUND('',#2888,.T.);
#2272=FACE_OUTER_BOUND('',#2889,.T.);
#2273=FACE_OUTER_BOUND('',#2890,.T.);
#2274=FACE_OUTER_BOUND('',#2891,.T.);
#2275=FACE_OUTER_BOUND('',#2892,.T.);
#2276=FACE_OUTER_BOUND('',#2893,.T.);
#2277=FACE_OUTER_BOUND('',#2894,.T.);
#2278=FACE_OUTER_BOUND('',#2895,.T.);
#2279=FACE_OUTER_BOUND('',#2896,.T.);
#2280=FACE_OUTER_BOUND('',#2897,.T.);
#2281=FACE_OUTER_BOUND('',#2898,.T.);
#2282=FACE_OUTER_BOUND('',#2899,.T.);
#2283=FACE_OUTER_BOUND('',#2900,.T.);
#2284=FACE_OUTER_BOUND('',#2901,.T.);
#2285=FACE_OUTER_BOUND('',#2902,.T.);
#2286=FACE_OUTER_BOUND('',#2903,.T.);
#2287=FACE_OUTER_BOUND('',#2904,.T.);
#2288=FACE_OUTER_BOUND('',#2905,.T.);
#2289=FACE_OUTER_BOUND('',#2906,.T.);
#2290=FACE_OUTER_BOUND('',#2907,.T.);
#2291=FACE_OUTER_BOUND('',#2908,.T.);
#2292=FACE_OUTER_BOUND('',#2909,.T.);
#2293=FACE_OUTER_BOUND('',#2910,.T.);
#2294=FACE_OUTER_BOUND('',#2911,.T.);
#2295=FACE_OUTER_BOUND('',#2912,.T.);
#2296=FACE_OUTER_BOUND('',#2913,.T.);
#2297=FACE_OUTER_BOUND('',#2914,.T.);
#2298=FACE_OUTER_BOUND('',#2915,.T.);
#2299=FACE_OUTER_BOUND('',#2916,.T.);
#2300=FACE_OUTER_BOUND('',#2917,.T.);
#2301=FACE_OUTER_BOUND('',#2918,.T.);
#2302=FACE_OUTER_BOUND('',#2919,.T.);
#2303=FACE_OUTER_BOUND('',#2920,.T.);
#2304=FACE_OUTER_BOUND('',#2921,.T.);
#2305=FACE_OUTER_BOUND('',#2922,.T.);
#2306=FACE_OUTER_BOUND('',#2923,.T.);
#2307=FACE_OUTER_BOUND('',#2924,.T.);
#2308=FACE_OUTER_BOUND('',#2925,.T.);
#2309=FACE_OUTER_BOUND('',#2926,.T.);
#2310=FACE_OUTER_BOUND('',#2927,.T.);
#2311=FACE_OUTER_BOUND('',#2928,.T.);
#2312=FACE_OUTER_BOUND('',#2929,.T.);
#2313=FACE_OUTER_BOUND('',#2930,.T.);
#2314=FACE_OUTER_BOUND('',#2931,.T.);
#2315=FACE_OUTER_BOUND('',#2932,.T.);
#2316=FACE_OUTER_BOUND('',#2933,.T.);
#2317=FACE_OUTER_BOUND('',#2934,.T.);
#2318=FACE_OUTER_BOUND('',#2935,.T.);
#2319=FACE_OUTER_BOUND('',#2936,.T.);
#2320=FACE_OUTER_BOUND('',#2937,.T.);
#2321=FACE_OUTER_BOUND('',#2938,.T.);
#2322=FACE_OUTER_BOUND('',#2939,.T.);
#2323=FACE_OUTER_BOUND('',#2940,.T.);
#2324=FACE_OUTER_BOUND('',#2941,.T.);
#2325=FACE_OUTER_BOUND('',#2942,.T.);
#2326=FACE_OUTER_BOUND('',#2943,.T.);
#2327=FACE_OUTER_BOUND('',#2944,.T.);
#2328=FACE_OUTER_BOUND('',#2945,.T.);
#2329=FACE_OUTER_BOUND('',#2946,.T.);
#2330=FACE_OUTER_BOUND('',#2947,.T.);
#2331=FACE_OUTER_BOUND('',#2948,.T.);
#2332=FACE_OUTER_BOUND('',#2949,.T.);
#2333=FACE_OUTER_BOUND('',#2950,.T.);
#2334=FACE_OUTER_BOUND('',#2951,.T.);
#2335=FACE_OUTER_BOUND('',#2952,.T.);
#2336=FACE_OUTER_BOUND('',#2953,.T.);
#2337=FACE_OUTER_BOUND('',#2954,.T.);
#2338=FACE_OUTER_BOUND('',#2955,.T.);
#2339=FACE_OUTER_BOUND('',#2956,.T.);
#2340=FACE_OUTER_BOUND('',#2957,.T.);
#2341=FACE_OUTER_BOUND('',#2958,.T.);
#2342=FACE_OUTER_BOUND('',#2959,.T.);
#2343=FACE_OUTER_BOUND('',#2960,.T.);
#2344=FACE_OUTER_BOUND('',#2961,.T.);
#2345=FACE_OUTER_BOUND('',#2962,.T.);
#2346=FACE_OUTER_BOUND('',#2963,.T.);
#2347=FACE_OUTER_BOUND('',#2964,.T.);
#2348=FACE_OUTER_BOUND('',#2965,.T.);
#2349=FACE_OUTER_BOUND('',#2966,.T.);
#2350=FACE_OUTER_BOUND('',#2967,.T.);
#2351=FACE_OUTER_BOUND('',#2968,.T.);
#2352=FACE_OUTER_BOUND('',#2969,.T.);
#2353=FACE_OUTER_BOUND('',#2970,.T.);
#2354=FACE_OUTER_BOUND('',#2971,.T.);
#2355=FACE_OUTER_BOUND('',#2972,.T.);
#2356=FACE_OUTER_BOUND('',#2973,.T.);
#2357=FACE_OUTER_BOUND('',#2974,.T.);
#2358=FACE_OUTER_BOUND('',#2975,.T.);
#2359=FACE_OUTER_BOUND('',#2976,.T.);
#2360=FACE_OUTER_BOUND('',#2977,.T.);
#2361=FACE_OUTER_BOUND('',#2978,.T.);
#2362=FACE_OUTER_BOUND('',#2979,.T.);
#2363=FACE_OUTER_BOUND('',#2980,.T.);
#2364=FACE_OUTER_BOUND('',#2981,.T.);
#2365=FACE_OUTER_BOUND('',#2982,.T.);
#2366=FACE_OUTER_BOUND('',#2983,.T.);
#2367=FACE_OUTER_BOUND('',#2984,.T.);
#2368=FACE_OUTER_BOUND('',#2985,.T.);
#2369=FACE_OUTER_BOUND('',#2986,.T.);
#2370=FACE_OUTER_BOUND('',#2987,.T.);
#2371=FACE_OUTER_BOUND('',#2988,.T.);
#2372=FACE_OUTER_BOUND('',#2989,.T.);
#2373=FACE_OUTER_BOUND('',#2990,.T.);
#2374=FACE_OUTER_BOUND('',#2991,.T.);
#2375=FACE_OUTER_BOUND('',#2992,.T.);
#2376=FACE_OUTER_BOUND('',#2993,.T.);
#2377=FACE_OUTER_BOUND('',#2994,.T.);
#2378=FACE_OUTER_BOUND('',#2995,.T.);
#2379=FACE_OUTER_BOUND('',#2996,.T.);
#2380=FACE_OUTER_BOUND('',#2997,.T.);
#2381=FACE_OUTER_BOUND('',#2998,.T.);
#2382=FACE_OUTER_BOUND('',#2999,.T.);
#2383=FACE_OUTER_BOUND('',#3000,.T.);
#2384=FACE_OUTER_BOUND('',#3001,.T.);
#2385=FACE_OUTER_BOUND('',#3002,.T.);
#2386=FACE_OUTER_BOUND('',#3003,.T.);
#2387=FACE_OUTER_BOUND('',#3004,.T.);
#2388=FACE_OUTER_BOUND('',#3005,.T.);
#2389=FACE_OUTER_BOUND('',#3006,.T.);
#2390=FACE_OUTER_BOUND('',#3007,.T.);
#2391=FACE_OUTER_BOUND('',#3008,.T.);
#2392=FACE_OUTER_BOUND('',#3009,.T.);
#2393=FACE_OUTER_BOUND('',#3010,.T.);
#2394=FACE_OUTER_BOUND('',#3011,.T.);
#2395=FACE_OUTER_BOUND('',#3012,.T.);
#2396=FACE_OUTER_BOUND('',#3013,.T.);
#2397=FACE_OUTER_BOUND('',#3014,.T.);
#2398=FACE_OUTER_BOUND('',#3015,.T.);
#2399=FACE_OUTER_BOUND('',#3016,.T.);
#2400=FACE_OUTER_BOUND('',#3017,.T.);
#2401=FACE_OUTER_BOUND('',#3018,.T.);
#2402=FACE_OUTER_BOUND('',#3019,.T.);
#2403=FACE_OUTER_BOUND('',#3020,.T.);
#2404=FACE_OUTER_BOUND('',#3021,.T.);
#2405=FACE_OUTER_BOUND('',#3022,.T.);
#2406=FACE_OUTER_BOUND('',#3023,.T.);
#2407=FACE_OUTER_BOUND('',#3024,.T.);
#2408=FACE_OUTER_BOUND('',#3025,.T.);
#2409=FACE_OUTER_BOUND('',#3026,.T.);
#2410=FACE_OUTER_BOUND('',#3027,.T.);
#2411=FACE_OUTER_BOUND('',#3028,.T.);
#2412=FACE_OUTER_BOUND('',#3029,.T.);
#2413=FACE_OUTER_BOUND('',#3030,.T.);
#2414=FACE_OUTER_BOUND('',#3031,.T.);
#2415=FACE_OUTER_BOUND('',#3032,.T.);
#2416=FACE_OUTER_BOUND('',#3033,.T.);
#2417=FACE_OUTER_BOUND('',#3034,.T.);
#2418=FACE_OUTER_BOUND('',#3035,.T.);
#2419=FACE_OUTER_BOUND('',#3036,.T.);
#2420=FACE_OUTER_BOUND('',#3037,.T.);
#2421=FACE_OUTER_BOUND('',#3038,.T.);
#2422=FACE_OUTER_BOUND('',#3039,.T.);
#2423=FACE_OUTER_BOUND('',#3040,.T.);
#2424=FACE_OUTER_BOUND('',#3041,.T.);
#2425=FACE_OUTER_BOUND('',#3042,.T.);
#2426=FACE_OUTER_BOUND('',#3043,.T.);
#2427=FACE_OUTER_BOUND('',#3044,.T.);
#2428=FACE_OUTER_BOUND('',#3045,.T.);
#2429=FACE_OUTER_BOUND('',#3046,.T.);
#2430=FACE_OUTER_BOUND('',#3047,.T.);
#2431=FACE_OUTER_BOUND('',#3048,.T.);
#2432=FACE_OUTER_BOUND('',#3049,.T.);
#2433=FACE_OUTER_BOUND('',#3050,.T.);
#2434=FACE_OUTER_BOUND('',#3051,.T.);
#2435=FACE_OUTER_BOUND('',#3052,.T.);
#2436=FACE_OUTER_BOUND('',#3053,.T.);
#2437=FACE_OUTER_BOUND('',#3054,.T.);
#2438=FACE_OUTER_BOUND('',#3055,.T.);
#2439=FACE_OUTER_BOUND('',#3056,.T.);
#2440=FACE_OUTER_BOUND('',#3057,.T.);
#2441=FACE_OUTER_BOUND('',#3058,.T.);
#2442=FACE_OUTER_BOUND('',#3059,.T.);
#2443=FACE_OUTER_BOUND('',#3060,.T.);
#2444=FACE_OUTER_BOUND('',#3061,.T.);
#2445=FACE_OUTER_BOUND('',#3062,.T.);
#2446=FACE_OUTER_BOUND('',#3063,.T.);
#2447=FACE_OUTER_BOUND('',#3064,.T.);
#2448=FACE_OUTER_BOUND('',#3065,.T.);
#2449=FACE_OUTER_BOUND('',#3066,.T.);
#2450=FACE_OUTER_BOUND('',#3067,.T.);
#2451=FACE_OUTER_BOUND('',#3068,.T.);
#2452=FACE_OUTER_BOUND('',#3069,.T.);
#2453=FACE_OUTER_BOUND('',#3070,.T.);
#2454=FACE_OUTER_BOUND('',#3071,.T.);
#2455=FACE_OUTER_BOUND('',#3072,.T.);
#2456=FACE_OUTER_BOUND('',#3073,.T.);
#2457=FACE_OUTER_BOUND('',#3076,.T.);
#2458=FACE_OUTER_BOUND('',#3077,.T.);
#2459=FACE_OUTER_BOUND('',#3078,.T.);
#2460=FACE_OUTER_BOUND('',#3079,.T.);
#2461=FACE_OUTER_BOUND('',#3080,.T.);
#2462=FACE_OUTER_BOUND('',#3081,.T.);
#2463=FACE_OUTER_BOUND('',#3082,.T.);
#2464=FACE_OUTER_BOUND('',#3083,.T.);
#2465=FACE_OUTER_BOUND('',#3084,.T.);
#2466=FACE_OUTER_BOUND('',#3085,.T.);
#2467=FACE_OUTER_BOUND('',#3086,.T.);
#2468=FACE_OUTER_BOUND('',#3088,.T.);
#2469=FACE_OUTER_BOUND('',#3089,.T.);
#2470=FACE_OUTER_BOUND('',#3090,.T.);
#2471=FACE_OUTER_BOUND('',#3092,.T.);
#2472=FACE_OUTER_BOUND('',#3093,.T.);
#2473=FACE_OUTER_BOUND('',#3095,.T.);
#2474=FACE_OUTER_BOUND('',#3096,.T.);
#2475=FACE_OUTER_BOUND('',#3097,.T.);
#2476=FACE_OUTER_BOUND('',#3098,.T.);
#2477=FACE_OUTER_BOUND('',#3099,.T.);
#2478=FACE_OUTER_BOUND('',#3100,.T.);
#2479=FACE_OUTER_BOUND('',#3101,.T.);
#2480=FACE_OUTER_BOUND('',#3102,.T.);
#2481=FACE_OUTER_BOUND('',#3103,.T.);
#2482=FACE_OUTER_BOUND('',#3104,.T.);
#2483=FACE_OUTER_BOUND('',#3105,.T.);
#2484=FACE_OUTER_BOUND('',#3106,.T.);
#2485=FACE_OUTER_BOUND('',#3107,.T.);
#2486=FACE_OUTER_BOUND('',#3108,.T.);
#2487=FACE_OUTER_BOUND('',#3109,.T.);
#2488=FACE_OUTER_BOUND('',#3110,.T.);
#2489=FACE_OUTER_BOUND('',#3111,.T.);
#2490=FACE_OUTER_BOUND('',#3112,.T.);
#2491=FACE_OUTER_BOUND('',#3114,.T.);
#2492=FACE_OUTER_BOUND('',#3115,.T.);
#2493=FACE_OUTER_BOUND('',#3117,.T.);
#2494=FACE_OUTER_BOUND('',#3118,.T.);
#2495=FACE_OUTER_BOUND('',#3119,.T.);
#2496=FACE_OUTER_BOUND('',#3120,.T.);
#2497=FACE_OUTER_BOUND('',#3121,.T.);
#2498=FACE_OUTER_BOUND('',#3122,.T.);
#2499=FACE_OUTER_BOUND('',#3123,.T.);
#2500=FACE_OUTER_BOUND('',#3124,.T.);
#2501=FACE_OUTER_BOUND('',#3125,.T.);
#2502=FACE_OUTER_BOUND('',#3126,.T.);
#2503=FACE_OUTER_BOUND('',#3127,.T.);
#2504=FACE_OUTER_BOUND('',#3128,.T.);
#2505=FACE_OUTER_BOUND('',#3129,.T.);
#2506=FACE_OUTER_BOUND('',#3130,.T.);
#2507=FACE_OUTER_BOUND('',#3131,.T.);
#2508=FACE_OUTER_BOUND('',#3132,.T.);
#2509=FACE_OUTER_BOUND('',#3133,.T.);
#2510=FACE_OUTER_BOUND('',#3134,.T.);
#2511=FACE_OUTER_BOUND('',#3135,.T.);
#2512=FACE_OUTER_BOUND('',#3136,.T.);
#2513=FACE_OUTER_BOUND('',#3137,.T.);
#2514=FACE_OUTER_BOUND('',#3138,.T.);
#2515=FACE_OUTER_BOUND('',#3139,.T.);
#2516=FACE_OUTER_BOUND('',#3140,.T.);
#2517=FACE_OUTER_BOUND('',#3141,.T.);
#2518=FACE_OUTER_BOUND('',#3142,.T.);
#2519=FACE_OUTER_BOUND('',#3143,.T.);
#2520=FACE_OUTER_BOUND('',#3144,.T.);
#2521=FACE_OUTER_BOUND('',#3145,.T.);
#2522=FACE_OUTER_BOUND('',#3146,.T.);
#2523=FACE_OUTER_BOUND('',#3147,.T.);
#2524=FACE_OUTER_BOUND('',#3148,.T.);
#2525=FACE_OUTER_BOUND('',#3149,.T.);
#2526=FACE_OUTER_BOUND('',#3150,.T.);
#2527=FACE_OUTER_BOUND('',#3151,.T.);
#2528=FACE_OUTER_BOUND('',#3152,.T.);
#2529=FACE_OUTER_BOUND('',#3153,.T.);
#2530=FACE_OUTER_BOUND('',#3154,.T.);
#2531=FACE_OUTER_BOUND('',#3155,.T.);
#2532=FACE_OUTER_BOUND('',#3156,.T.);
#2533=FACE_OUTER_BOUND('',#3157,.T.);
#2534=FACE_OUTER_BOUND('',#3158,.T.);
#2535=FACE_OUTER_BOUND('',#3159,.T.);
#2536=FACE_OUTER_BOUND('',#3160,.T.);
#2537=FACE_OUTER_BOUND('',#3161,.T.);
#2538=FACE_OUTER_BOUND('',#3162,.T.);
#2539=FACE_OUTER_BOUND('',#3163,.T.);
#2540=FACE_OUTER_BOUND('',#3164,.T.);
#2541=FACE_OUTER_BOUND('',#3165,.T.);
#2542=FACE_OUTER_BOUND('',#3166,.T.);
#2543=FACE_OUTER_BOUND('',#3167,.T.);
#2544=FACE_OUTER_BOUND('',#3168,.T.);
#2545=FACE_OUTER_BOUND('',#3169,.T.);
#2546=FACE_OUTER_BOUND('',#3170,.T.);
#2547=FACE_OUTER_BOUND('',#3171,.T.);
#2548=FACE_OUTER_BOUND('',#3172,.T.);
#2549=FACE_OUTER_BOUND('',#3173,.T.);
#2550=FACE_OUTER_BOUND('',#3174,.T.);
#2551=FACE_OUTER_BOUND('',#3175,.T.);
#2552=FACE_OUTER_BOUND('',#3176,.T.);
#2553=FACE_OUTER_BOUND('',#3177,.T.);
#2554=FACE_OUTER_BOUND('',#3178,.T.);
#2555=FACE_OUTER_BOUND('',#3179,.T.);
#2556=FACE_OUTER_BOUND('',#3180,.T.);
#2557=FACE_OUTER_BOUND('',#3181,.T.);
#2558=FACE_OUTER_BOUND('',#3182,.T.);
#2559=FACE_OUTER_BOUND('',#3183,.T.);
#2560=FACE_OUTER_BOUND('',#3184,.T.);
#2561=FACE_OUTER_BOUND('',#3185,.T.);
#2562=FACE_OUTER_BOUND('',#3186,.T.);
#2563=FACE_OUTER_BOUND('',#3187,.T.);
#2564=FACE_OUTER_BOUND('',#3188,.T.);
#2565=FACE_OUTER_BOUND('',#3189,.T.);
#2566=FACE_OUTER_BOUND('',#3190,.T.);
#2567=FACE_OUTER_BOUND('',#3191,.T.);
#2568=EDGE_LOOP('',(#6244,#6245,#6246,#6247));
#2569=EDGE_LOOP('',(#6248,#6249,#6250,#6251));
#2570=EDGE_LOOP('',(#6252,#6253,#6254,#6255));
#2571=EDGE_LOOP('',(#6256,#6257,#6258,#6259));
#2572=EDGE_LOOP('',(#6260,#6261,#6262,#6263));
#2573=EDGE_LOOP('',(#6264,#6265,#6266,#6267));
#2574=EDGE_LOOP('',(#6268,#6269,#6270,#6271));
#2575=EDGE_LOOP('',(#6272,#6273,#6274,#6275));
#2576=EDGE_LOOP('',(#6276,#6277,#6278,#6279));
#2577=EDGE_LOOP('',(#6280,#6281,#6282,#6283));
#2578=EDGE_LOOP('',(#6284,#6285,#6286,#6287));
#2579=EDGE_LOOP('',(#6288,#6289,#6290,#6291));
#2580=EDGE_LOOP('',(#6292,#6293,#6294,#6295));
#2581=EDGE_LOOP('',(#6296,#6297,#6298,#6299));
#2582=EDGE_LOOP('',(#6300,#6301,#6302,#6303));
#2583=EDGE_LOOP('',(#6304,#6305,#6306,#6307));
#2584=EDGE_LOOP('',(#6308,#6309,#6310,#6311));
#2585=EDGE_LOOP('',(#6312,#6313,#6314,#6315));
#2586=EDGE_LOOP('',(#6316,#6317,#6318,#6319));
#2587=EDGE_LOOP('',(#6320,#6321,#6322,#6323));
#2588=EDGE_LOOP('',(#6324,#6325,#6326,#6327));
#2589=EDGE_LOOP('',(#6328,#6329,#6330,#6331));
#2590=EDGE_LOOP('',(#6332,#6333,#6334,#6335));
#2591=EDGE_LOOP('',(#6336,#6337,#6338,#6339));
#2592=EDGE_LOOP('',(#6340,#6341,#6342,#6343));
#2593=EDGE_LOOP('',(#6344,#6345,#6346,#6347));
#2594=EDGE_LOOP('',(#6348,#6349,#6350,#6351));
#2595=EDGE_LOOP('',(#6352,#6353,#6354,#6355));
#2596=EDGE_LOOP('',(#6356,#6357,#6358,#6359));
#2597=EDGE_LOOP('',(#6360,#6361,#6362,#6363));
#2598=EDGE_LOOP('',(#6364,#6365,#6366,#6367));
#2599=EDGE_LOOP('',(#6368,#6369,#6370,#6371));
#2600=EDGE_LOOP('',(#6372,#6373,#6374,#6375));
#2601=EDGE_LOOP('',(#6376,#6377,#6378,#6379));
#2602=EDGE_LOOP('',(#6380,#6381,#6382,#6383));
#2603=EDGE_LOOP('',(#6384,#6385,#6386,#6387));
#2604=EDGE_LOOP('',(#6388,#6389,#6390,#6391,#6392,#6393));
#2605=EDGE_LOOP('',(#6394,#6395,#6396,#6397));
#2606=EDGE_LOOP('',(#6398,#6399,#6400,#6401,#6402,#6403));
#2607=EDGE_LOOP('',(#6404,#6405,#6406,#6407));
#2608=EDGE_LOOP('',(#6408,#6409,#6410,#6411));
#2609=EDGE_LOOP('',(#6412,#6413,#6414,#6415));
#2610=EDGE_LOOP('',(#6416,#6417,#6418,#6419));
#2611=EDGE_LOOP('',(#6420,#6421,#6422,#6423));
#2612=EDGE_LOOP('',(#6424,#6425,#6426,#6427));
#2613=EDGE_LOOP('',(#6428,#6429,#6430,#6431));
#2614=EDGE_LOOP('',(#6432,#6433,#6434,#6435,#6436,#6437));
#2615=EDGE_LOOP('',(#6438,#6439,#6440,#6441));
#2616=EDGE_LOOP('',(#6442,#6443,#6444,#6445,#6446,#6447));
#2617=EDGE_LOOP('',(#6448,#6449,#6450,#6451));
#2618=EDGE_LOOP('',(#6452,#6453,#6454,#6455));
#2619=EDGE_LOOP('',(#6456,#6457,#6458,#6459));
#2620=EDGE_LOOP('',(#6460,#6461,#6462,#6463));
#2621=EDGE_LOOP('',(#6464,#6465,#6466,#6467));
#2622=EDGE_LOOP('',(#6468,#6469,#6470,#6471));
#2623=EDGE_LOOP('',(#6472,#6473,#6474));
#2624=EDGE_LOOP('',(#6475,#6476,#6477,#6478));
#2625=EDGE_LOOP('',(#6479,#6480,#6481));
#2626=EDGE_LOOP('',(#6482,#6483,#6484,#6485,#6486,#6487));
#2627=EDGE_LOOP('',(#6488,#6489,#6490,#6491,#6492,#6493,#6494,#6495,#6496,
#6497,#6498,#6499,#6500,#6501));
#2628=EDGE_LOOP('',(#6502,#6503,#6504,#6505,#6506));
#2629=EDGE_LOOP('',(#6507,#6508,#6509,#6510));
#2630=EDGE_LOOP('',(#6511,#6512,#6513,#6514));
#2631=EDGE_LOOP('',(#6515,#6516,#6517,#6518));
#2632=EDGE_LOOP('',(#6519,#6520,#6521,#6522));
#2633=EDGE_LOOP('',(#6523,#6524,#6525,#6526));
#2634=EDGE_LOOP('',(#6527,#6528,#6529,#6530));
#2635=EDGE_LOOP('',(#6531,#6532,#6533,#6534));
#2636=EDGE_LOOP('',(#6535,#6536,#6537));
#2637=EDGE_LOOP('',(#6538,#6539,#6540,#6541));
#2638=EDGE_LOOP('',(#6542,#6543,#6544));
#2639=EDGE_LOOP('',(#6545,#6546,#6547,#6548,#6549));
#2640=EDGE_LOOP('',(#6550,#6551,#6552,#6553,#6554));
#2641=EDGE_LOOP('',(#6555,#6556,#6557,#6558));
#2642=EDGE_LOOP('',(#6559,#6560,#6561,#6562));
#2643=EDGE_LOOP('',(#6563,#6564,#6565,#6566,#6567,#6568));
#2644=EDGE_LOOP('',(#6569,#6570,#6571));
#2645=EDGE_LOOP('',(#6572,#6573,#6574,#6575,#6576,#6577,#6578,#6579));
#2646=EDGE_LOOP('',(#6580,#6581,#6582,#6583,#6584,#6585));
#2647=EDGE_LOOP('',(#6586,#6587,#6588,#6589));
#2648=EDGE_LOOP('',(#6590,#6591,#6592,#6593,#6594));
#2649=EDGE_LOOP('',(#6595,#6596,#6597,#6598));
#2650=EDGE_LOOP('',(#6599,#6600,#6601,#6602));
#2651=EDGE_LOOP('',(#6603,#6604,#6605));
#2652=EDGE_LOOP('',(#6606,#6607,#6608,#6609,#6610,#6611,#6612,#6613));
#2653=EDGE_LOOP('',(#6614,#6615,#6616,#6617));
#2654=EDGE_LOOP('',(#6618,#6619,#6620,#6621));
#2655=EDGE_LOOP('',(#6622,#6623,#6624,#6625));
#2656=EDGE_LOOP('',(#6626,#6627,#6628,#6629));
#2657=EDGE_LOOP('',(#6630,#6631,#6632,#6633));
#2658=EDGE_LOOP('',(#6634,#6635,#6636,#6637));
#2659=EDGE_LOOP('',(#6638,#6639,#6640,#6641));
#2660=EDGE_LOOP('',(#6642,#6643,#6644,#6645,#6646));
#2661=EDGE_LOOP('',(#6647,#6648,#6649,#6650));
#2662=EDGE_LOOP('',(#6651,#6652,#6653,#6654));
#2663=EDGE_LOOP('',(#6655,#6656,#6657,#6658));
#2664=EDGE_LOOP('',(#6659,#6660,#6661,#6662,#6663));
#2665=EDGE_LOOP('',(#6664,#6665,#6666,#6667));
#2666=EDGE_LOOP('',(#6668,#6669,#6670,#6671,#6672,#6673));
#2667=EDGE_LOOP('',(#6674,#6675,#6676,#6677,#6678));
#2668=EDGE_LOOP('',(#6679,#6680,#6681,#6682));
#2669=EDGE_LOOP('',(#6683,#6684,#6685,#6686));
#2670=EDGE_LOOP('',(#6687,#6688,#6689,#6690,#6691,#6692,#6693,#6694,#6695));
#2671=EDGE_LOOP('',(#6696,#6697,#6698,#6699));
#2672=EDGE_LOOP('',(#6700,#6701,#6702,#6703));
#2673=EDGE_LOOP('',(#6704,#6705,#6706,#6707,#6708,#6709,#6710,#6711,#6712,
#6713,#6714,#6715));
#2674=EDGE_LOOP('',(#6716,#6717,#6718,#6719,#6720));
#2675=EDGE_LOOP('',(#6721,#6722,#6723,#6724));
#2676=EDGE_LOOP('',(#6725,#6726,#6727,#6728));
#2677=EDGE_LOOP('',(#6729,#6730,#6731,#6732));
#2678=EDGE_LOOP('',(#6733,#6734,#6735,#6736));
#2679=EDGE_LOOP('',(#6737,#6738,#6739,#6740));
#2680=EDGE_LOOP('',(#6741,#6742,#6743,#6744,#6745,#6746,#6747,#6748,#6749));
#2681=EDGE_LOOP('',(#6750,#6751,#6752,#6753,#6754));
#2682=EDGE_LOOP('',(#6755,#6756,#6757,#6758));
#2683=EDGE_LOOP('',(#6759,#6760,#6761,#6762,#6763));
#2684=EDGE_LOOP('',(#6764,#6765,#6766,#6767));
#2685=EDGE_LOOP('',(#6768,#6769,#6770,#6771));
#2686=EDGE_LOOP('',(#6772,#6773,#6774,#6775));
#2687=EDGE_LOOP('',(#6776,#6777,#6778,#6779));
#2688=EDGE_LOOP('',(#6780,#6781,#6782,#6783));
#2689=EDGE_LOOP('',(#6784,#6785,#6786,#6787));
#2690=EDGE_LOOP('',(#6788,#6789,#6790,#6791,#6792));
#2691=EDGE_LOOP('',(#6793,#6794,#6795,#6796));
#2692=EDGE_LOOP('',(#6797,#6798,#6799,#6800,#6801,#6802,#6803,#6804));
#2693=EDGE_LOOP('',(#6805,#6806,#6807,#6808));
#2694=EDGE_LOOP('',(#6809,#6810,#6811,#6812,#6813,#6814,#6815,#6816));
#2695=EDGE_LOOP('',(#6817,#6818,#6819,#6820,#6821));
#2696=EDGE_LOOP('',(#6822,#6823,#6824,#6825,#6826,#6827,#6828,#6829));
#2697=EDGE_LOOP('',(#6830,#6831,#6832,#6833,#6834,#6835,#6836,#6837,#6838,
#6839,#6840,#6841));
#2698=EDGE_LOOP('',(#6842,#6843,#6844,#6845,#6846,#6847));
#2699=EDGE_LOOP('',(#6848,#6849,#6850,#6851,#6852,#6853));
#2700=EDGE_LOOP('',(#6854,#6855,#6856,#6857,#6858,#6859,#6860,#6861,#6862,
#6863,#6864,#6865,#6866,#6867,#6868,#6869));
#2701=EDGE_LOOP('',(#6870,#6871,#6872,#6873,#6874,#6875,#6876,#6877));
#2702=EDGE_LOOP('',(#6878,#6879));
#2703=EDGE_LOOP('',(#6880,#6881));
#2704=EDGE_LOOP('',(#6882,#6883,#6884,#6885,#6886,#6887,#6888,#6889,#6890,
#6891,#6892,#6893,#6894,#6895,#6896,#6897,#6898,#6899,#6900,#6901,#6902,
#6903,#6904,#6905));
#2705=EDGE_LOOP('',(#6906,#6907,#6908,#6909));
#2706=EDGE_LOOP('',(#6910,#6911,#6912,#6913));
#2707=EDGE_LOOP('',(#6914,#6915,#6916,#6917,#6918,#6919));
#2708=EDGE_LOOP('',(#6920,#6921,#6922,#6923,#6924,#6925,#6926,#6927,#6928,
#6929,#6930,#6931,#6932,#6933,#6934,#6935,#6936,#6937));
#2709=EDGE_LOOP('',(#6938,#6939,#6940,#6941));
#2710=EDGE_LOOP('',(#6942,#6943,#6944,#6945));
#2711=EDGE_LOOP('',(#6946,#6947,#6948,#6949));
#2712=EDGE_LOOP('',(#6950,#6951,#6952,#6953));
#2713=EDGE_LOOP('',(#6954,#6955,#6956,#6957,#6958,#6959));
#2714=EDGE_LOOP('',(#6960,#6961,#6962,#6963,#6964));
#2715=EDGE_LOOP('',(#6965,#6966,#6967,#6968,#6969));
#2716=EDGE_LOOP('',(#6970,#6971,#6972,#6973));
#2717=EDGE_LOOP('',(#6974,#6975,#6976,#6977));
#2718=EDGE_LOOP('',(#6978,#6979,#6980,#6981));
#2719=EDGE_LOOP('',(#6982,#6983,#6984,#6985));
#2720=EDGE_LOOP('',(#6986,#6987,#6988,#6989));
#2721=EDGE_LOOP('',(#6990,#6991,#6992,#6993));
#2722=EDGE_LOOP('',(#6994,#6995,#6996,#6997));
#2723=EDGE_LOOP('',(#6998,#6999,#7000,#7001));
#2724=EDGE_LOOP('',(#7002,#7003,#7004,#7005,#7006,#7007));
#2725=EDGE_LOOP('',(#7008,#7009,#7010,#7011));
#2726=EDGE_LOOP('',(#7012,#7013,#7014,#7015,#7016,#7017));
#2727=EDGE_LOOP('',(#7018,#7019,#7020,#7021));
#2728=EDGE_LOOP('',(#7022,#7023,#7024,#7025));
#2729=EDGE_LOOP('',(#7026,#7027,#7028,#7029));
#2730=EDGE_LOOP('',(#7030,#7031,#7032,#7033));
#2731=EDGE_LOOP('',(#7034,#7035,#7036,#7037));
#2732=EDGE_LOOP('',(#7038,#7039,#7040,#7041));
#2733=EDGE_LOOP('',(#7042,#7043,#7044,#7045));
#2734=EDGE_LOOP('',(#7046,#7047,#7048,#7049,#7050,#7051));
#2735=EDGE_LOOP('',(#7052,#7053,#7054,#7055));
#2736=EDGE_LOOP('',(#7056,#7057,#7058,#7059,#7060,#7061));
#2737=EDGE_LOOP('',(#7062,#7063,#7064,#7065));
#2738=EDGE_LOOP('',(#7066,#7067,#7068,#7069));
#2739=EDGE_LOOP('',(#7070,#7071,#7072,#7073));
#2740=EDGE_LOOP('',(#7074,#7075,#7076,#7077));
#2741=EDGE_LOOP('',(#7078,#7079,#7080,#7081));
#2742=EDGE_LOOP('',(#7082,#7083,#7084,#7085));
#2743=EDGE_LOOP('',(#7086,#7087,#7088));
#2744=EDGE_LOOP('',(#7089,#7090,#7091,#7092));
#2745=EDGE_LOOP('',(#7093,#7094,#7095));
#2746=EDGE_LOOP('',(#7096,#7097,#7098,#7099,#7100,#7101));
#2747=EDGE_LOOP('',(#7102,#7103,#7104,#7105,#7106,#7107,#7108,#7109,#7110,
#7111,#7112,#7113,#7114,#7115));
#2748=EDGE_LOOP('',(#7116,#7117,#7118,#7119,#7120));
#2749=EDGE_LOOP('',(#7121,#7122,#7123,#7124));
#2750=EDGE_LOOP('',(#7125,#7126,#7127,#7128));
#2751=EDGE_LOOP('',(#7129,#7130,#7131,#7132));
#2752=EDGE_LOOP('',(#7133,#7134,#7135,#7136));
#2753=EDGE_LOOP('',(#7137,#7138,#7139,#7140));
#2754=EDGE_LOOP('',(#7141,#7142,#7143,#7144));
#2755=EDGE_LOOP('',(#7145,#7146,#7147,#7148));
#2756=EDGE_LOOP('',(#7149,#7150,#7151));
#2757=EDGE_LOOP('',(#7152,#7153,#7154,#7155));
#2758=EDGE_LOOP('',(#7156,#7157,#7158));
#2759=EDGE_LOOP('',(#7159,#7160,#7161,#7162,#7163));
#2760=EDGE_LOOP('',(#7164,#7165,#7166,#7167,#7168));
#2761=EDGE_LOOP('',(#7169,#7170,#7171,#7172));
#2762=EDGE_LOOP('',(#7173,#7174,#7175,#7176));
#2763=EDGE_LOOP('',(#7177,#7178,#7179,#7180,#7181,#7182));
#2764=EDGE_LOOP('',(#7183,#7184,#7185));
#2765=EDGE_LOOP('',(#7186,#7187,#7188,#7189,#7190,#7191,#7192,#7193));
#2766=EDGE_LOOP('',(#7194,#7195,#7196,#7197,#7198,#7199));
#2767=EDGE_LOOP('',(#7200,#7201,#7202,#7203));
#2768=EDGE_LOOP('',(#7204,#7205,#7206,#7207,#7208));
#2769=EDGE_LOOP('',(#7209,#7210,#7211,#7212));
#2770=EDGE_LOOP('',(#7213,#7214,#7215,#7216));
#2771=EDGE_LOOP('',(#7217,#7218,#7219));
#2772=EDGE_LOOP('',(#7220,#7221,#7222,#7223,#7224,#7225,#7226,#7227));
#2773=EDGE_LOOP('',(#7228,#7229,#7230,#7231));
#2774=EDGE_LOOP('',(#7232,#7233,#7234,#7235));
#2775=EDGE_LOOP('',(#7236,#7237,#7238,#7239));
#2776=EDGE_LOOP('',(#7240,#7241,#7242,#7243));
#2777=EDGE_LOOP('',(#7244,#7245,#7246,#7247));
#2778=EDGE_LOOP('',(#7248,#7249,#7250,#7251));
#2779=EDGE_LOOP('',(#7252,#7253,#7254,#7255));
#2780=EDGE_LOOP('',(#7256,#7257,#7258,#7259,#7260));
#2781=EDGE_LOOP('',(#7261,#7262,#7263,#7264));
#2782=EDGE_LOOP('',(#7265,#7266,#7267,#7268));
#2783=EDGE_LOOP('',(#7269,#7270,#7271,#7272));
#2784=EDGE_LOOP('',(#7273,#7274,#7275,#7276,#7277));
#2785=EDGE_LOOP('',(#7278,#7279,#7280,#7281));
#2786=EDGE_LOOP('',(#7282,#7283,#7284,#7285,#7286,#7287));
#2787=EDGE_LOOP('',(#7288,#7289,#7290,#7291,#7292));
#2788=EDGE_LOOP('',(#7293,#7294,#7295,#7296));
#2789=EDGE_LOOP('',(#7297,#7298,#7299,#7300));
#2790=EDGE_LOOP('',(#7301,#7302,#7303,#7304,#7305,#7306,#7307,#7308,#7309));
#2791=EDGE_LOOP('',(#7310,#7311,#7312,#7313));
#2792=EDGE_LOOP('',(#7314,#7315,#7316,#7317));
#2793=EDGE_LOOP('',(#7318,#7319,#7320,#7321,#7322,#7323,#7324,#7325,#7326,
#7327,#7328,#7329));
#2794=EDGE_LOOP('',(#7330,#7331,#7332,#7333,#7334));
#2795=EDGE_LOOP('',(#7335,#7336,#7337,#7338));
#2796=EDGE_LOOP('',(#7339,#7340,#7341,#7342));
#2797=EDGE_LOOP('',(#7343,#7344,#7345,#7346));
#2798=EDGE_LOOP('',(#7347,#7348,#7349,#7350));
#2799=EDGE_LOOP('',(#7351,#7352,#7353,#7354));
#2800=EDGE_LOOP('',(#7355,#7356,#7357,#7358,#7359,#7360,#7361,#7362,#7363));
#2801=EDGE_LOOP('',(#7364,#7365,#7366,#7367,#7368));
#2802=EDGE_LOOP('',(#7369,#7370,#7371,#7372));
#2803=EDGE_LOOP('',(#7373,#7374,#7375,#7376,#7377));
#2804=EDGE_LOOP('',(#7378,#7379,#7380,#7381));
#2805=EDGE_LOOP('',(#7382,#7383,#7384,#7385));
#2806=EDGE_LOOP('',(#7386,#7387,#7388,#7389));
#2807=EDGE_LOOP('',(#7390,#7391,#7392,#7393));
#2808=EDGE_LOOP('',(#7394,#7395,#7396,#7397));
#2809=EDGE_LOOP('',(#7398,#7399,#7400,#7401));
#2810=EDGE_LOOP('',(#7402,#7403,#7404,#7405,#7406));
#2811=EDGE_LOOP('',(#7407,#7408,#7409,#7410));
#2812=EDGE_LOOP('',(#7411,#7412,#7413,#7414,#7415,#7416,#7417,#7418));
#2813=EDGE_LOOP('',(#7419,#7420,#7421,#7422));
#2814=EDGE_LOOP('',(#7423,#7424,#7425,#7426,#7427,#7428,#7429,#7430));
#2815=EDGE_LOOP('',(#7431,#7432,#7433,#7434,#7435));
#2816=EDGE_LOOP('',(#7436,#7437,#7438,#7439,#7440,#7441,#7442,#7443));
#2817=EDGE_LOOP('',(#7444,#7445,#7446,#7447,#7448,#7449,#7450,#7451,#7452,
#7453,#7454,#7455));
#2818=EDGE_LOOP('',(#7456,#7457,#7458,#7459,#7460,#7461));
#2819=EDGE_LOOP('',(#7462,#7463,#7464,#7465,#7466,#7467));
#2820=EDGE_LOOP('',(#7468,#7469,#7470,#7471,#7472,#7473,#7474,#7475,#7476,
#7477,#7478,#7479,#7480,#7481,#7482,#7483));
#2821=EDGE_LOOP('',(#7484,#7485,#7486,#7487));
#2822=EDGE_LOOP('',(#7488,#7489,#7490,#7491,#7492,#7493,#7494,#7495,#7496,
#7497,#7498,#7499,#7500,#7501,#7502,#7503,#7504,#7505));
#2823=EDGE_LOOP('',(#7506,#7507,#7508,#7509));
#2824=EDGE_LOOP('',(#7510,#7511,#7512,#7513));
#2825=EDGE_LOOP('',(#7514,#7515,#7516,#7517));
#2826=EDGE_LOOP('',(#7518,#7519,#7520,#7521));
#2827=EDGE_LOOP('',(#7522,#7523,#7524,#7525));
#2828=EDGE_LOOP('',(#7526,#7527,#7528,#7529));
#2829=EDGE_LOOP('',(#7530,#7531,#7532,#7533));
#2830=EDGE_LOOP('',(#7534,#7535,#7536,#7537));
#2831=EDGE_LOOP('',(#7538,#7539,#7540,#7541));
#2832=EDGE_LOOP('',(#7542,#7543,#7544,#7545));
#2833=EDGE_LOOP('',(#7546,#7547,#7548,#7549));
#2834=EDGE_LOOP('',(#7550,#7551,#7552,#7553));
#2835=EDGE_LOOP('',(#7554,#7555,#7556,#7557));
#2836=EDGE_LOOP('',(#7558,#7559,#7560,#7561,#7562,#7563));
#2837=EDGE_LOOP('',(#7564,#7565,#7566,#7567));
#2838=EDGE_LOOP('',(#7568,#7569,#7570,#7571,#7572,#7573));
#2839=EDGE_LOOP('',(#7574,#7575,#7576,#7577));
#2840=EDGE_LOOP('',(#7578,#7579,#7580,#7581));
#2841=EDGE_LOOP('',(#7582,#7583,#7584,#7585));
#2842=EDGE_LOOP('',(#7586,#7587,#7588,#7589));
#2843=EDGE_LOOP('',(#7590,#7591,#7592,#7593));
#2844=EDGE_LOOP('',(#7594,#7595,#7596,#7597));
#2845=EDGE_LOOP('',(#7598,#7599,#7600,#7601));
#2846=EDGE_LOOP('',(#7602,#7603,#7604,#7605,#7606,#7607));
#2847=EDGE_LOOP('',(#7608,#7609,#7610,#7611));
#2848=EDGE_LOOP('',(#7612,#7613,#7614,#7615,#7616,#7617));
#2849=EDGE_LOOP('',(#7618,#7619,#7620,#7621));
#2850=EDGE_LOOP('',(#7622,#7623,#7624,#7625));
#2851=EDGE_LOOP('',(#7626,#7627,#7628,#7629));
#2852=EDGE_LOOP('',(#7630,#7631,#7632,#7633));
#2853=EDGE_LOOP('',(#7634,#7635,#7636,#7637));
#2854=EDGE_LOOP('',(#7638,#7639,#7640,#7641));
#2855=EDGE_LOOP('',(#7642,#7643,#7644));
#2856=EDGE_LOOP('',(#7645,#7646,#7647,#7648));
#2857=EDGE_LOOP('',(#7649,#7650,#7651));
#2858=EDGE_LOOP('',(#7652,#7653,#7654,#7655,#7656,#7657));
#2859=EDGE_LOOP('',(#7658,#7659,#7660,#7661,#7662,#7663,#7664,#7665,#7666,
#7667,#7668,#7669,#7670,#7671));
#2860=EDGE_LOOP('',(#7672,#7673,#7674,#7675,#7676));
#2861=EDGE_LOOP('',(#7677,#7678,#7679,#7680));
#2862=EDGE_LOOP('',(#7681,#7682,#7683,#7684));
#2863=EDGE_LOOP('',(#7685,#7686,#7687,#7688));
#2864=EDGE_LOOP('',(#7689,#7690,#7691,#7692));
#2865=EDGE_LOOP('',(#7693,#7694,#7695,#7696));
#2866=EDGE_LOOP('',(#7697,#7698,#7699,#7700));
#2867=EDGE_LOOP('',(#7701,#7702,#7703,#7704));
#2868=EDGE_LOOP('',(#7705,#7706,#7707));
#2869=EDGE_LOOP('',(#7708,#7709,#7710,#7711));
#2870=EDGE_LOOP('',(#7712,#7713,#7714));
#2871=EDGE_LOOP('',(#7715,#7716,#7717,#7718,#7719));
#2872=EDGE_LOOP('',(#7720,#7721,#7722,#7723,#7724));
#2873=EDGE_LOOP('',(#7725,#7726,#7727,#7728));
#2874=EDGE_LOOP('',(#7729,#7730,#7731,#7732));
#2875=EDGE_LOOP('',(#7733,#7734,#7735,#7736,#7737,#7738));
#2876=EDGE_LOOP('',(#7739,#7740,#7741));
#2877=EDGE_LOOP('',(#7742,#7743,#7744,#7745,#7746,#7747,#7748,#7749));
#2878=EDGE_LOOP('',(#7750,#7751,#7752,#7753,#7754,#7755));
#2879=EDGE_LOOP('',(#7756,#7757,#7758,#7759));
#2880=EDGE_LOOP('',(#7760,#7761,#7762,#7763,#7764));
#2881=EDGE_LOOP('',(#7765,#7766,#7767,#7768));
#2882=EDGE_LOOP('',(#7769,#7770,#7771,#7772));
#2883=EDGE_LOOP('',(#7773,#7774,#7775));
#2884=EDGE_LOOP('',(#7776,#7777,#7778,#7779,#7780,#7781,#7782,#7783));
#2885=EDGE_LOOP('',(#7784,#7785,#7786,#7787));
#2886=EDGE_LOOP('',(#7788,#7789,#7790,#7791));
#2887=EDGE_LOOP('',(#7792,#7793,#7794,#7795));
#2888=EDGE_LOOP('',(#7796,#7797,#7798,#7799));
#2889=EDGE_LOOP('',(#7800,#7801,#7802,#7803));
#2890=EDGE_LOOP('',(#7804,#7805,#7806,#7807));
#2891=EDGE_LOOP('',(#7808,#7809,#7810,#7811));
#2892=EDGE_LOOP('',(#7812,#7813,#7814,#7815,#7816));
#2893=EDGE_LOOP('',(#7817,#7818,#7819,#7820));
#2894=EDGE_LOOP('',(#7821,#7822,#7823,#7824));
#2895=EDGE_LOOP('',(#7825,#7826,#7827,#7828));
#2896=EDGE_LOOP('',(#7829,#7830,#7831,#7832,#7833));
#2897=EDGE_LOOP('',(#7834,#7835,#7836,#7837));
#2898=EDGE_LOOP('',(#7838,#7839,#7840,#7841,#7842,#7843));
#2899=EDGE_LOOP('',(#7844,#7845,#7846,#7847,#7848));
#2900=EDGE_LOOP('',(#7849,#7850,#7851,#7852));
#2901=EDGE_LOOP('',(#7853,#7854,#7855,#7856));
#2902=EDGE_LOOP('',(#7857,#7858,#7859,#7860,#7861,#7862,#7863,#7864,#7865));
#2903=EDGE_LOOP('',(#7866,#7867,#7868,#7869));
#2904=EDGE_LOOP('',(#7870,#7871,#7872,#7873));
#2905=EDGE_LOOP('',(#7874,#7875,#7876,#7877,#7878,#7879,#7880,#7881,#7882,
#7883,#7884,#7885));
#2906=EDGE_LOOP('',(#7886,#7887,#7888,#7889,#7890));
#2907=EDGE_LOOP('',(#7891,#7892,#7893,#7894));
#2908=EDGE_LOOP('',(#7895,#7896,#7897,#7898));
#2909=EDGE_LOOP('',(#7899,#7900,#7901,#7902));
#2910=EDGE_LOOP('',(#7903,#7904,#7905,#7906));
#2911=EDGE_LOOP('',(#7907,#7908,#7909,#7910));
#2912=EDGE_LOOP('',(#7911,#7912,#7913,#7914,#7915,#7916,#7917,#7918,#7919));
#2913=EDGE_LOOP('',(#7920,#7921,#7922,#7923,#7924));
#2914=EDGE_LOOP('',(#7925,#7926,#7927,#7928));
#2915=EDGE_LOOP('',(#7929,#7930,#7931,#7932,#7933));
#2916=EDGE_LOOP('',(#7934,#7935,#7936,#7937));
#2917=EDGE_LOOP('',(#7938,#7939,#7940,#7941));
#2918=EDGE_LOOP('',(#7942,#7943,#7944,#7945));
#2919=EDGE_LOOP('',(#7946,#7947,#7948,#7949));
#2920=EDGE_LOOP('',(#7950,#7951,#7952,#7953));
#2921=EDGE_LOOP('',(#7954,#7955,#7956,#7957));
#2922=EDGE_LOOP('',(#7958,#7959,#7960,#7961,#7962));
#2923=EDGE_LOOP('',(#7963,#7964,#7965,#7966));
#2924=EDGE_LOOP('',(#7967,#7968,#7969,#7970,#7971,#7972,#7973,#7974));
#2925=EDGE_LOOP('',(#7975,#7976,#7977,#7978));
#2926=EDGE_LOOP('',(#7979,#7980,#7981,#7982,#7983,#7984,#7985,#7986));
#2927=EDGE_LOOP('',(#7987,#7988,#7989,#7990,#7991));
#2928=EDGE_LOOP('',(#7992,#7993,#7994,#7995,#7996,#7997,#7998,#7999));
#2929=EDGE_LOOP('',(#8000,#8001,#8002,#8003,#8004,#8005,#8006,#8007,#8008,
#8009,#8010,#8011));
#2930=EDGE_LOOP('',(#8012,#8013,#8014,#8015,#8016,#8017));
#2931=EDGE_LOOP('',(#8018,#8019,#8020,#8021,#8022,#8023));
#2932=EDGE_LOOP('',(#8024,#8025,#8026,#8027,#8028,#8029,#8030,#8031,#8032,
#8033,#8034,#8035,#8036,#8037,#8038,#8039));
#2933=EDGE_LOOP('',(#8040,#8041,#8042,#8043,#8044,#8045,#8046,#8047,#8048,
#8049,#8050,#8051,#8052,#8053,#8054,#8055,#8056,#8057,#8058,#8059,#8060,
#8061,#8062,#8063));
#2934=EDGE_LOOP('',(#8064,#8065,#8066,#8067));
#2935=EDGE_LOOP('',(#8068,#8069,#8070,#8071));
#2936=EDGE_LOOP('',(#8072,#8073,#8074,#8075,#8076,#8077));
#2937=EDGE_LOOP('',(#8078,#8079,#8080,#8081));
#2938=EDGE_LOOP('',(#8082,#8083,#8084,#8085));
#2939=EDGE_LOOP('',(#8086,#8087,#8088,#8089));
#2940=EDGE_LOOP('',(#8090,#8091,#8092,#8093));
#2941=EDGE_LOOP('',(#8094,#8095,#8096,#8097,#8098));
#2942=EDGE_LOOP('',(#8099,#8100,#8101,#8102,#8103));
#2943=EDGE_LOOP('',(#8104,#8105,#8106,#8107,#8108,#8109));
#2944=EDGE_LOOP('',(#8110,#8111,#8112,#8113));
#2945=EDGE_LOOP('',(#8114,#8115,#8116,#8117));
#2946=EDGE_LOOP('',(#8118,#8119,#8120,#8121));
#2947=EDGE_LOOP('',(#8122,#8123,#8124,#8125));
#2948=EDGE_LOOP('',(#8126,#8127,#8128,#8129));
#2949=EDGE_LOOP('',(#8130,#8131,#8132,#8133));
#2950=EDGE_LOOP('',(#8134,#8135,#8136,#8137));
#2951=EDGE_LOOP('',(#8138,#8139,#8140,#8141));
#2952=EDGE_LOOP('',(#8142,#8143,#8144,#8145,#8146,#8147));
#2953=EDGE_LOOP('',(#8148,#8149,#8150,#8151));
#2954=EDGE_LOOP('',(#8152,#8153,#8154,#8155,#8156,#8157));
#2955=EDGE_LOOP('',(#8158,#8159,#8160,#8161));
#2956=EDGE_LOOP('',(#8162,#8163,#8164,#8165));
#2957=EDGE_LOOP('',(#8166,#8167,#8168,#8169));
#2958=EDGE_LOOP('',(#8170,#8171,#8172,#8173));
#2959=EDGE_LOOP('',(#8174,#8175,#8176,#8177));
#2960=EDGE_LOOP('',(#8178,#8179,#8180,#8181));
#2961=EDGE_LOOP('',(#8182,#8183,#8184,#8185));
#2962=EDGE_LOOP('',(#8186,#8187,#8188,#8189,#8190,#8191));
#2963=EDGE_LOOP('',(#8192,#8193,#8194,#8195));
#2964=EDGE_LOOP('',(#8196,#8197,#8198,#8199,#8200,#8201));
#2965=EDGE_LOOP('',(#8202,#8203,#8204,#8205));
#2966=EDGE_LOOP('',(#8206,#8207,#8208,#8209));
#2967=EDGE_LOOP('',(#8210,#8211,#8212,#8213));
#2968=EDGE_LOOP('',(#8214,#8215,#8216,#8217));
#2969=EDGE_LOOP('',(#8218,#8219,#8220,#8221));
#2970=EDGE_LOOP('',(#8222,#8223,#8224,#8225));
#2971=EDGE_LOOP('',(#8226,#8227,#8228));
#2972=EDGE_LOOP('',(#8229,#8230,#8231,#8232));
#2973=EDGE_LOOP('',(#8233,#8234,#8235));
#2974=EDGE_LOOP('',(#8236,#8237,#8238,#8239,#8240,#8241));
#2975=EDGE_LOOP('',(#8242,#8243,#8244,#8245,#8246,#8247,#8248,#8249,#8250,
#8251,#8252,#8253,#8254,#8255));
#2976=EDGE_LOOP('',(#8256,#8257,#8258,#8259,#8260));
#2977=EDGE_LOOP('',(#8261,#8262,#8263,#8264));
#2978=EDGE_LOOP('',(#8265,#8266,#8267,#8268));
#2979=EDGE_LOOP('',(#8269,#8270,#8271,#8272));
#2980=EDGE_LOOP('',(#8273,#8274,#8275,#8276));
#2981=EDGE_LOOP('',(#8277,#8278,#8279,#8280));
#2982=EDGE_LOOP('',(#8281,#8282,#8283,#8284));
#2983=EDGE_LOOP('',(#8285,#8286,#8287,#8288));
#2984=EDGE_LOOP('',(#8289,#8290,#8291));
#2985=EDGE_LOOP('',(#8292,#8293,#8294,#8295));
#2986=EDGE_LOOP('',(#8296,#8297,#8298));
#2987=EDGE_LOOP('',(#8299,#8300,#8301,#8302,#8303));
#2988=EDGE_LOOP('',(#8304,#8305,#8306,#8307,#8308));
#2989=EDGE_LOOP('',(#8309,#8310,#8311,#8312));
#2990=EDGE_LOOP('',(#8313,#8314,#8315,#8316));
#2991=EDGE_LOOP('',(#8317,#8318,#8319,#8320,#8321,#8322));
#2992=EDGE_LOOP('',(#8323,#8324,#8325));
#2993=EDGE_LOOP('',(#8326,#8327,#8328,#8329,#8330,#8331,#8332,#8333));
#2994=EDGE_LOOP('',(#8334,#8335,#8336,#8337,#8338,#8339));
#2995=EDGE_LOOP('',(#8340,#8341,#8342,#8343));
#2996=EDGE_LOOP('',(#8344,#8345,#8346,#8347,#8348));
#2997=EDGE_LOOP('',(#8349,#8350,#8351,#8352));
#2998=EDGE_LOOP('',(#8353,#8354,#8355,#8356));
#2999=EDGE_LOOP('',(#8357,#8358,#8359));
#3000=EDGE_LOOP('',(#8360,#8361,#8362,#8363,#8364,#8365,#8366,#8367));
#3001=EDGE_LOOP('',(#8368,#8369,#8370,#8371));
#3002=EDGE_LOOP('',(#8372,#8373,#8374,#8375));
#3003=EDGE_LOOP('',(#8376,#8377,#8378,#8379));
#3004=EDGE_LOOP('',(#8380,#8381,#8382,#8383));
#3005=EDGE_LOOP('',(#8384,#8385,#8386,#8387));
#3006=EDGE_LOOP('',(#8388,#8389,#8390,#8391));
#3007=EDGE_LOOP('',(#8392,#8393,#8394,#8395));
#3008=EDGE_LOOP('',(#8396,#8397,#8398,#8399,#8400));
#3009=EDGE_LOOP('',(#8401,#8402,#8403,#8404));
#3010=EDGE_LOOP('',(#8405,#8406,#8407,#8408));
#3011=EDGE_LOOP('',(#8409,#8410,#8411,#8412));
#3012=EDGE_LOOP('',(#8413,#8414,#8415,#8416,#8417));
#3013=EDGE_LOOP('',(#8418,#8419,#8420,#8421));
#3014=EDGE_LOOP('',(#8422,#8423,#8424,#8425,#8426,#8427));
#3015=EDGE_LOOP('',(#8428,#8429,#8430,#8431,#8432));
#3016=EDGE_LOOP('',(#8433,#8434,#8435,#8436));
#3017=EDGE_LOOP('',(#8437,#8438,#8439,#8440));
#3018=EDGE_LOOP('',(#8441,#8442,#8443,#8444,#8445,#8446,#8447,#8448,#8449));
#3019=EDGE_LOOP('',(#8450,#8451,#8452,#8453));
#3020=EDGE_LOOP('',(#8454,#8455,#8456,#8457));
#3021=EDGE_LOOP('',(#8458,#8459,#8460,#8461,#8462,#8463,#8464,#8465,#8466,
#8467,#8468,#8469));
#3022=EDGE_LOOP('',(#8470,#8471,#8472,#8473,#8474));
#3023=EDGE_LOOP('',(#8475,#8476,#8477,#8478));
#3024=EDGE_LOOP('',(#8479,#8480,#8481,#8482));
#3025=EDGE_LOOP('',(#8483,#8484,#8485,#8486));
#3026=EDGE_LOOP('',(#8487,#8488,#8489,#8490));
#3027=EDGE_LOOP('',(#8491,#8492,#8493,#8494));
#3028=EDGE_LOOP('',(#8495,#8496,#8497,#8498,#8499,#8500,#8501,#8502,#8503));
#3029=EDGE_LOOP('',(#8504,#8505,#8506,#8507,#8508));
#3030=EDGE_LOOP('',(#8509,#8510,#8511,#8512));
#3031=EDGE_LOOP('',(#8513,#8514,#8515,#8516,#8517));
#3032=EDGE_LOOP('',(#8518,#8519,#8520,#8521));
#3033=EDGE_LOOP('',(#8522,#8523,#8524,#8525));
#3034=EDGE_LOOP('',(#8526,#8527,#8528,#8529));
#3035=EDGE_LOOP('',(#8530,#8531,#8532,#8533));
#3036=EDGE_LOOP('',(#8534,#8535,#8536,#8537));
#3037=EDGE_LOOP('',(#8538,#8539,#8540,#8541));
#3038=EDGE_LOOP('',(#8542,#8543,#8544,#8545,#8546));
#3039=EDGE_LOOP('',(#8547,#8548,#8549,#8550));
#3040=EDGE_LOOP('',(#8551,#8552,#8553,#8554,#8555,#8556,#8557,#8558));
#3041=EDGE_LOOP('',(#8559,#8560,#8561,#8562));
#3042=EDGE_LOOP('',(#8563,#8564,#8565,#8566,#8567,#8568,#8569,#8570));
#3043=EDGE_LOOP('',(#8571,#8572,#8573,#8574,#8575));
#3044=EDGE_LOOP('',(#8576,#8577,#8578,#8579,#8580,#8581,#8582,#8583));
#3045=EDGE_LOOP('',(#8584,#8585,#8586,#8587,#8588,#8589,#8590,#8591,#8592,
#8593,#8594,#8595));
#3046=EDGE_LOOP('',(#8596,#8597,#8598,#8599,#8600,#8601));
#3047=EDGE_LOOP('',(#8602,#8603,#8604,#8605,#8606,#8607));
#3048=EDGE_LOOP('',(#8608,#8609,#8610,#8611,#8612,#8613,#8614,#8615,#8616,
#8617,#8618,#8619,#8620,#8621,#8622,#8623));
#3049=EDGE_LOOP('',(#8624,#8625,#8626,#8627));
#3050=EDGE_LOOP('',(#8628,#8629,#8630,#8631));
#3051=EDGE_LOOP('',(#8632,#8633,#8634,#8635));
#3052=EDGE_LOOP('',(#8636,#8637,#8638,#8639));
#3053=EDGE_LOOP('',(#8640,#8641,#8642,#8643));
#3054=EDGE_LOOP('',(#8644,#8645,#8646,#8647));
#3055=EDGE_LOOP('',(#8648,#8649,#8650,#8651,#8652));
#3056=EDGE_LOOP('',(#8653,#8654,#8655,#8656,#8657));
#3057=EDGE_LOOP('',(#8658,#8659,#8660,#8661,#8662,#8663));
#3058=EDGE_LOOP('',(#8664,#8665,#8666,#8667,#8668,#8669));
#3059=EDGE_LOOP('',(#8670,#8671,#8672,#8673));
#3060=EDGE_LOOP('',(#8674,#8675,#8676,#8677));
#3061=EDGE_LOOP('',(#8678,#8679,#8680,#8681));
#3062=EDGE_LOOP('',(#8682,#8683,#8684,#8685));
#3063=EDGE_LOOP('',(#8686,#8687,#8688,#8689,#8690,#8691));
#3064=EDGE_LOOP('',(#8692,#8693,#8694,#8695));
#3065=EDGE_LOOP('',(#8696,#8697,#8698,#8699));
#3066=EDGE_LOOP('',(#8700,#8701,#8702,#8703));
#3067=EDGE_LOOP('',(#8704,#8705,#8706,#8707,#8708,#8709));
#3068=EDGE_LOOP('',(#8710,#8711,#8712,#8713));
#3069=EDGE_LOOP('',(#8714,#8715,#8716,#8717));
#3070=EDGE_LOOP('',(#8718,#8719,#8720,#8721,#8722,#8723));
#3071=EDGE_LOOP('',(#8724,#8725,#8726,#8727,#8728));
#3072=EDGE_LOOP('',(#8729,#8730,#8731,#8732));
#3073=EDGE_LOOP('',(#8733,#8734,#8735,#8736,#8737,#8738,#8739,#8740));
#3074=EDGE_LOOP('',(#8741));
#3075=EDGE_LOOP('',(#8742));
#3076=EDGE_LOOP('',(#8743,#8744,#8745,#8746));
#3077=EDGE_LOOP('',(#8747,#8748,#8749,#8750));
#3078=EDGE_LOOP('',(#8751,#8752,#8753,#8754));
#3079=EDGE_LOOP('',(#8755,#8756,#8757,#8758));
#3080=EDGE_LOOP('',(#8759,#8760,#8761,#8762));
#3081=EDGE_LOOP('',(#8763,#8764,#8765,#8766));
#3082=EDGE_LOOP('',(#8767,#8768,#8769,#8770));
#3083=EDGE_LOOP('',(#8771,#8772,#8773,#8774));
#3084=EDGE_LOOP('',(#8775,#8776,#8777,#8778));
#3085=EDGE_LOOP('',(#8779,#8780,#8781,#8782));
#3086=EDGE_LOOP('',(#8783,#8784,#8785,#8786,#8787,#8788,#8789,#8790));
#3087=EDGE_LOOP('',(#8791,#8792,#8793,#8794,#8795,#8796,#8797,#8798));
#3088=EDGE_LOOP('',(#8799,#8800,#8801,#8802,#8803));
#3089=EDGE_LOOP('',(#8804,#8805,#8806,#8807,#8808));
#3090=EDGE_LOOP('',(#8809));
#3091=EDGE_LOOP('',(#8810));
#3092=EDGE_LOOP('',(#8811,#8812,#8813,#8814));
#3093=EDGE_LOOP('',(#8815,#8816));
#3094=EDGE_LOOP('',(#8817));
#3095=EDGE_LOOP('',(#8818,#8819,#8820,#8821,#8822));
#3096=EDGE_LOOP('',(#8823,#8824,#8825,#8826,#8827,#8828,#8829,#8830));
#3097=EDGE_LOOP('',(#8831,#8832,#8833,#8834));
#3098=EDGE_LOOP('',(#8835,#8836,#8837,#8838));
#3099=EDGE_LOOP('',(#8839,#8840,#8841,#8842));
#3100=EDGE_LOOP('',(#8843,#8844,#8845,#8846));
#3101=EDGE_LOOP('',(#8847,#8848,#8849,#8850));
#3102=EDGE_LOOP('',(#8851,#8852,#8853,#8854));
#3103=EDGE_LOOP('',(#8855,#8856,#8857,#8858));
#3104=EDGE_LOOP('',(#8859,#8860,#8861,#8862));
#3105=EDGE_LOOP('',(#8863,#8864,#8865,#8866));
#3106=EDGE_LOOP('',(#8867,#8868,#8869,#8870));
#3107=EDGE_LOOP('',(#8871,#8872,#8873,#8874));
#3108=EDGE_LOOP('',(#8875,#8876,#8877,#8878));
#3109=EDGE_LOOP('',(#8879,#8880,#8881,#8882));
#3110=EDGE_LOOP('',(#8883,#8884,#8885,#8886,#8887,#8888,#8889,#8890));
#3111=EDGE_LOOP('',(#8891,#8892,#8893,#8894,#8895));
#3112=EDGE_LOOP('',(#8896,#8897));
#3113=EDGE_LOOP('',(#8898));
#3114=EDGE_LOOP('',(#8899,#8900,#8901,#8902));
#3115=EDGE_LOOP('',(#8903));
#3116=EDGE_LOOP('',(#8904));
#3117=EDGE_LOOP('',(#8905,#8906,#8907,#8908,#8909));
#3118=EDGE_LOOP('',(#8910,#8911,#8912,#8913));
#3119=EDGE_LOOP('',(#8914,#8915,#8916,#8917));
#3120=EDGE_LOOP('',(#8918,#8919,#8920,#8921));
#3121=EDGE_LOOP('',(#8922,#8923,#8924,#8925));
#3122=EDGE_LOOP('',(#8926,#8927,#8928,#8929));
#3123=EDGE_LOOP('',(#8930,#8931,#8932,#8933));
#3124=EDGE_LOOP('',(#8934,#8935,#8936,#8937));
#3125=EDGE_LOOP('',(#8938,#8939,#8940,#8941));
#3126=EDGE_LOOP('',(#8942,#8943,#8944,#8945));
#3127=EDGE_LOOP('',(#8946,#8947,#8948,#8949,#8950,#8951));
#3128=EDGE_LOOP('',(#8952,#8953,#8954,#8955));
#3129=EDGE_LOOP('',(#8956,#8957,#8958,#8959));
#3130=EDGE_LOOP('',(#8960,#8961,#8962,#8963));
#3131=EDGE_LOOP('',(#8964,#8965,#8966,#8967));
#3132=EDGE_LOOP('',(#8968,#8969,#8970,#8971));
#3133=EDGE_LOOP('',(#8972,#8973,#8974,#8975));
#3134=EDGE_LOOP('',(#8976,#8977,#8978,#8979));
#3135=EDGE_LOOP('',(#8980,#8981,#8982,#8983));
#3136=EDGE_LOOP('',(#8984,#8985,#8986,#8987));
#3137=EDGE_LOOP('',(#8988,#8989,#8990,#8991));
#3138=EDGE_LOOP('',(#8992,#8993,#8994,#8995));
#3139=EDGE_LOOP('',(#8996,#8997,#8998,#8999));
#3140=EDGE_LOOP('',(#9000,#9001,#9002,#9003));
#3141=EDGE_LOOP('',(#9004,#9005,#9006,#9007));
#3142=EDGE_LOOP('',(#9008,#9009,#9010,#9011));
#3143=EDGE_LOOP('',(#9012,#9013,#9014,#9015));
#3144=EDGE_LOOP('',(#9016,#9017,#9018,#9019));
#3145=EDGE_LOOP('',(#9020,#9021,#9022,#9023));
#3146=EDGE_LOOP('',(#9024,#9025,#9026,#9027));
#3147=EDGE_LOOP('',(#9028,#9029,#9030,#9031));
#3148=EDGE_LOOP('',(#9032,#9033,#9034,#9035,#9036,#9037));
#3149=EDGE_LOOP('',(#9038,#9039,#9040,#9041));
#3150=EDGE_LOOP('',(#9042,#9043,#9044,#9045));
#3151=EDGE_LOOP('',(#9046,#9047,#9048,#9049));
#3152=EDGE_LOOP('',(#9050,#9051,#9052,#9053));
#3153=EDGE_LOOP('',(#9054,#9055,#9056,#9057));
#3154=EDGE_LOOP('',(#9058,#9059,#9060,#9061));
#3155=EDGE_LOOP('',(#9062,#9063,#9064,#9065));
#3156=EDGE_LOOP('',(#9066,#9067,#9068,#9069));
#3157=EDGE_LOOP('',(#9070,#9071,#9072,#9073,#9074,#9075));
#3158=EDGE_LOOP('',(#9076,#9077,#9078,#9079));
#3159=EDGE_LOOP('',(#9080,#9081,#9082,#9083));
#3160=EDGE_LOOP('',(#9084,#9085,#9086,#9087));
#3161=EDGE_LOOP('',(#9088,#9089,#9090,#9091));
#3162=EDGE_LOOP('',(#9092,#9093,#9094,#9095));
#3163=EDGE_LOOP('',(#9096,#9097,#9098,#9099));
#3164=EDGE_LOOP('',(#9100,#9101,#9102,#9103));
#3165=EDGE_LOOP('',(#9104,#9105,#9106,#9107));
#3166=EDGE_LOOP('',(#9108,#9109,#9110,#9111));
#3167=EDGE_LOOP('',(#9112,#9113,#9114,#9115));
#3168=EDGE_LOOP('',(#9116,#9117,#9118,#9119));
#3169=EDGE_LOOP('',(#9120,#9121,#9122,#9123));
#3170=EDGE_LOOP('',(#9124,#9125,#9126,#9127));
#3171=EDGE_LOOP('',(#9128,#9129,#9130,#9131));
#3172=EDGE_LOOP('',(#9132,#9133,#9134,#9135));
#3173=EDGE_LOOP('',(#9136,#9137,#9138,#9139));
#3174=EDGE_LOOP('',(#9140,#9141,#9142,#9143));
#3175=EDGE_LOOP('',(#9144,#9145,#9146,#9147));
#3176=EDGE_LOOP('',(#9148,#9149,#9150,#9151,#9152));
#3177=EDGE_LOOP('',(#9153,#9154,#9155,#9156,#9157));
#3178=EDGE_LOOP('',(#9158,#9159,#9160,#9161,#9162));
#3179=EDGE_LOOP('',(#9163,#9164,#9165,#9166,#9167));
#3180=EDGE_LOOP('',(#9168,#9169,#9170,#9171));
#3181=EDGE_LOOP('',(#9172,#9173,#9174,#9175));
#3182=EDGE_LOOP('',(#9176,#9177,#9178,#9179));
#3183=EDGE_LOOP('',(#9180,#9181,#9182,#9183));
#3184=EDGE_LOOP('',(#9184,#9185,#9186,#9187));
#3185=EDGE_LOOP('',(#9188,#9189,#9190,#9191));
#3186=EDGE_LOOP('',(#9192,#9193,#9194,#9195));
#3187=EDGE_LOOP('',(#9196,#9197,#9198,#9199));
#3188=EDGE_LOOP('',(#9200,#9201,#9202,#9203));
#3189=EDGE_LOOP('',(#9204,#9205,#9206,#9207));
#3190=EDGE_LOOP('',(#9208,#9209,#9210,#9211));
#3191=EDGE_LOOP('',(#9212,#9213,#9214,#9215));
#3192=ELLIPSE('',#9988,1.00030481857829,1.);
#3193=ELLIPSE('',#9990,0.500609358752858,0.5);
#3194=ELLIPSE('',#9994,0.500609358752858,0.5);
#3195=ELLIPSE('',#9995,1.00030481857829,0.999999999999998);
#3196=ELLIPSE('',#9999,1.00274003143314,0.999999999999998);
#3197=ELLIPSE('',#10002,1.00274003143315,0.999999999999998);
#3198=ELLIPSE('',#10004,1.0003048185783,1.00000000000002);
#3199=ELLIPSE('',#10006,0.500609358752858,0.5);
#3200=ELLIPSE('',#10010,0.500609358752858,0.5);
#3201=ELLIPSE('',#10011,1.00030481857829,0.999999999999998);
#3202=ELLIPSE('',#10015,1.00274003143314,0.999999999999998);
#3203=ELLIPSE('',#10018,1.00274003143315,0.999999999999998);
#3204=ELLIPSE('',#10020,1.00030481857829,1.);
#3205=ELLIPSE('',#10022,0.500609358752858,0.5);
#3206=ELLIPSE('',#10026,0.500609358752858,0.5);
#3207=ELLIPSE('',#10027,1.00030481857829,0.999999999999998);
#3208=ELLIPSE('',#10031,1.00274003143314,0.999999999999998);
#3209=ELLIPSE('',#10034,1.00274003143315,0.999999999999998);
#3210=ELLIPSE('',#10036,1.0003048185783,1.00000000000002);
#3211=ELLIPSE('',#10038,0.500609358752858,0.5);
#3212=ELLIPSE('',#10042,0.500609358752858,0.5);
#3213=ELLIPSE('',#10043,1.00030481857829,0.999999999999998);
#3214=ELLIPSE('',#10047,1.00274003143314,0.999999999999998);
#3215=ELLIPSE('',#10050,1.00274003143315,0.999999999999998);
#3216=ELLIPSE('',#10059,0.200373737411236,0.2);
#3217=ELLIPSE('',#10061,0.500336564673552,0.500000000000007);
#3218=ELLIPSE('',#10062,0.300560606116854,0.3);
#3219=ELLIPSE('',#10065,0.500336564673552,0.500000000000007);
#3220=ELLIPSE('',#10066,0.300560606116854,0.3);
#3221=ELLIPSE('',#10068,0.200373737411236,0.2);
#3222=ELLIPSE('',#10071,1.83221745488836,1.82880000000002);
#3223=ELLIPSE('',#10076,0.500336564673552,0.500000000000007);
#3224=ELLIPSE('',#10077,0.300560606116854,0.3);
#3225=ELLIPSE('',#10079,0.200373737411236,0.2);
#3226=ELLIPSE('',#10085,0.200373737411236,0.2);
#3227=ELLIPSE('',#10087,0.500336564673552,0.500000000000007);
#3228=ELLIPSE('',#10088,0.300560606116854,0.3);
#3229=ELLIPSE('',#10092,1.83221745488836,1.82880000000002);
#3230=ELLIPSE('',#10097,0.500171535589749,0.500000000000007);
#3231=ELLIPSE('',#10098,0.300285805548996,0.3);
#3232=ELLIPSE('',#10099,1.83017178806936,1.82880000000001);
#3233=ELLIPSE('',#10100,2.03003664347347,2.02880000000002);
#3234=ELLIPSE('',#10104,0.300285805548996,0.3);
#3235=ELLIPSE('',#10105,0.500171535589749,0.500000000000007);
#3236=ELLIPSE('',#10106,0.28305416415831,0.226369620596305);
#3237=ELLIPSE('',#10108,0.500171535589749,0.500000000000007);
#3238=ELLIPSE('',#10110,0.200373737411236,0.2);
#3239=ELLIPSE('',#10111,0.22693794097637,0.202093268660128);
#3240=ELLIPSE('',#10112,0.500171535589749,0.500000000000007);
#3241=ELLIPSE('',#10115,0.200373737411236,0.2);
#3242=ELLIPSE('',#10117,0.50033656467355,0.500000000000007);
#3243=ELLIPSE('',#10118,0.50033656467355,0.500000000000007);
#3244=ELLIPSE('',#10120,1.50182807625857,1.49999999999999);
#3245=ELLIPSE('',#10121,1.50182807625857,1.49999999999999);
#3246=ELLIPSE('',#10124,1.83221745488836,1.82880000000002);
#3247=ELLIPSE('',#10128,0.500171535589749,0.500000000000007);
#3248=ELLIPSE('',#10129,0.300285805548996,0.3);
#3249=ELLIPSE('',#10130,1.83017178806936,1.82880000000001);
#3250=ELLIPSE('',#10131,2.03003664347347,2.02880000000002);
#3251=ELLIPSE('',#10135,0.300560606116854,0.3);
#3252=ELLIPSE('',#10136,0.283070049785675,0.226376016920759);
#3253=ELLIPSE('',#10138,0.500171535589749,0.500000000000007);
#3254=ELLIPSE('',#10140,0.200373737411236,0.2);
#3255=ELLIPSE('',#10141,0.228523703934042,0.202830863162303);
#3256=ELLIPSE('',#10144,0.200373737411236,0.2);
#3257=ELLIPSE('',#10149,1.83221745488836,1.82880000000002);
#3258=ELLIPSE('',#10151,1.00003808418626,0.999999999999996);
#3259=ELLIPSE('',#10153,0.500076164021969,0.500000000000015);
#3260=ELLIPSE('',#10154,0.945581729181221,0.423842796982651);
#3261=ELLIPSE('',#10162,0.94573616593579,0.423988339935291);
#3262=ELLIPSE('',#10167,1.39016715670294,1.);
#3263=ELLIPSE('',#10169,1.00076177956274,1.);
#3264=ELLIPSE('',#10170,8.74309348745956,7.5248926039553);
#3265=ELLIPSE('',#10171,11.001675608483,11.);
#3266=ELLIPSE('',#10173,1.00003808418626,0.999999999999996);
#3267=ELLIPSE('',#10175,0.500076164021947,0.499999999999993);
#3268=ELLIPSE('',#10185,1.50114266934408,1.5);
#3269=ELLIPSE('',#10186,1.00171318935385,1.);
#3270=ELLIPSE('',#10190,8.74309348745786,7.52489260395233);
#3271=ELLIPSE('',#10191,11.001675608483,11.);
#3272=ELLIPSE('',#10193,1.0007617795627,1.);
#3273=ELLIPSE('',#10194,1.39016715670295,1.);
#3274=ELLIPSE('',#10198,1.00171318935385,1.);
#3275=ELLIPSE('',#10199,1.50114266934408,1.5);
#3276=ELLIPSE('',#10202,1.50182807625857,1.49999999999999);
#3277=ELLIPSE('',#10206,1.50182807625857,1.49999999999999);
#3278=ELLIPSE('',#10208,1.00274003143314,0.999999999999998);
#3279=ELLIPSE('',#10214,1.99090322420423,1.99060000000002);
#3280=ELLIPSE('',#10225,1.99090322420423,1.99060000000002);
#3281=ELLIPSE('',#10229,1.00274003143315,0.999999999999985);
#3282=ELLIPSE('',#10230,1.00030481857829,0.999999999999986);
#3283=ELLIPSE('',#10232,0.500609358752846,0.499999999999988);
#3284=ELLIPSE('',#10236,0.500609358752864,0.500000000000006);
#3285=ELLIPSE('',#10237,1.0003048185783,0.999999999999998);
#3286=ELLIPSE('',#10262,8.74309348746355,7.52489260396317);
#3287=ELLIPSE('',#10263,0.945186242974001,0.423473296589445);
#3288=ELLIPSE('',#10264,0.945133660504267,0.423423599783626);
#3289=ELLIPSE('',#10265,8.74309348748679,7.52489260400518);
#3290=ELLIPSE('',#10270,1.00076177956274,1.);
#3291=ELLIPSE('',#10274,1.00076177956274,1.);
#3292=ELLIPSE('',#10293,0.200373737411236,0.2);
#3293=ELLIPSE('',#10295,0.500336564673552,0.500000000000007);
#3294=ELLIPSE('',#10296,0.300560606116854,0.3);
#3295=ELLIPSE('',#10299,0.500336564673552,0.500000000000007);
#3296=ELLIPSE('',#10300,0.300560606116854,0.3);
#3297=ELLIPSE('',#10302,0.200373737411236,0.2);
#3298=ELLIPSE('',#10305,1.83221745488836,1.82880000000002);
#3299=ELLIPSE('',#10310,0.500336564673552,0.500000000000007);
#3300=ELLIPSE('',#10311,0.300560606116854,0.3);
#3301=ELLIPSE('',#10313,0.200373737411236,0.2);
#3302=ELLIPSE('',#10319,0.200373737411236,0.2);
#3303=ELLIPSE('',#10321,0.500336564673552,0.500000000000007);
#3304=ELLIPSE('',#10322,0.300560606116854,0.3);
#3305=ELLIPSE('',#10326,1.83221745488836,1.82880000000002);
#3306=ELLIPSE('',#10331,0.500171535589749,0.500000000000007);
#3307=ELLIPSE('',#10332,0.300285805548996,0.3);
#3308=ELLIPSE('',#10333,1.83017178806936,1.82880000000001);
#3309=ELLIPSE('',#10334,2.03003664347347,2.02880000000002);
#3310=ELLIPSE('',#10338,0.300285805548996,0.3);
#3311=ELLIPSE('',#10339,0.500171535589749,0.500000000000007);
#3312=ELLIPSE('',#10340,0.28320684970068,0.226430901627635);
#3313=ELLIPSE('',#10342,0.500171535589749,0.500000000000007);
#3314=ELLIPSE('',#10344,0.200373737411236,0.2);
#3315=ELLIPSE('',#10345,0.227082988256584,0.202170661444719);
#3316=ELLIPSE('',#10346,0.500171535589749,0.500000000000007);
#3317=ELLIPSE('',#10349,0.200373737411236,0.2);
#3318=ELLIPSE('',#10351,0.50033656467355,0.500000000000007);
#3319=ELLIPSE('',#10352,0.50033656467355,0.500000000000007);
#3320=ELLIPSE('',#10354,1.50182807625857,1.49999999999999);
#3321=ELLIPSE('',#10355,1.50182807625857,1.49999999999999);
#3322=ELLIPSE('',#10358,1.83221745488836,1.82880000000002);
#3323=ELLIPSE('',#10362,0.500171535589749,0.500000000000007);
#3324=ELLIPSE('',#10363,0.300285805548996,0.3);
#3325=ELLIPSE('',#10364,1.83017178806936,1.82880000000001);
#3326=ELLIPSE('',#10365,2.03003664347347,2.02880000000002);
#3327=ELLIPSE('',#10369,0.300560606116854,0.3);
#3328=ELLIPSE('',#10370,0.283213083245759,0.226433415411005);
#3329=ELLIPSE('',#10372,0.500171535589749,0.500000000000007);
#3330=ELLIPSE('',#10374,0.200373737411236,0.2);
#3331=ELLIPSE('',#10375,0.228664240308796,0.202904813790577);
#3332=ELLIPSE('',#10378,0.200373737411236,0.2);
#3333=ELLIPSE('',#10383,1.83221745488836,1.82880000000002);
#3334=ELLIPSE('',#10385,1.00003808418626,0.999999999999996);
#3335=ELLIPSE('',#10387,0.500076164021969,0.500000000000015);
#3336=ELLIPSE('',#10399,1.39016715670294,1.);
#3337=ELLIPSE('',#10401,11.001675608483,11.);
#3338=ELLIPSE('',#10403,1.00003808418626,0.999999999999996);
#3339=ELLIPSE('',#10405,0.500076164021947,0.499999999999993);
#3340=ELLIPSE('',#10415,1.50114266934408,1.5);
#3341=ELLIPSE('',#10416,1.00171318935385,1.);
#3342=ELLIPSE('',#10420,11.001675608483,11.);
#3343=ELLIPSE('',#10422,1.0007617795627,1.);
#3344=ELLIPSE('',#10423,1.39016715670295,1.);
#3345=ELLIPSE('',#10427,1.00171318935385,1.);
#3346=ELLIPSE('',#10428,1.50114266934408,1.5);
#3347=ELLIPSE('',#10431,1.50182807625857,1.49999999999999);
#3348=ELLIPSE('',#10435,1.50182807625857,1.49999999999999);
#3349=ELLIPSE('',#10437,1.00274003143314,0.999999999999998);
#3350=ELLIPSE('',#10443,1.99090322420423,1.99060000000002);
#3351=ELLIPSE('',#10454,1.99090322420423,1.99060000000002);
#3352=ELLIPSE('',#10458,1.00274003143315,0.999999999999985);
#3353=ELLIPSE('',#10459,1.00030481857829,0.999999999999986);
#3354=ELLIPSE('',#10461,0.500609358752846,0.499999999999988);
#3355=ELLIPSE('',#10465,0.500609358752864,0.500000000000006);
#3356=ELLIPSE('',#10466,1.0003048185783,0.999999999999998);
#3357=ELLIPSE('',#10488,1.0007617795627,1.);
#3358=ELLIPSE('',#10509,0.200373737411236,0.2);
#3359=ELLIPSE('',#10511,0.500336564673552,0.500000000000007);
#3360=ELLIPSE('',#10512,0.300560606116854,0.3);
#3361=ELLIPSE('',#10515,0.500336564673552,0.500000000000007);
#3362=ELLIPSE('',#10516,0.300560606116854,0.3);
#3363=ELLIPSE('',#10518,0.200373737411236,0.2);
#3364=ELLIPSE('',#10521,1.83221745488836,1.82880000000002);
#3365=ELLIPSE('',#10526,0.500336564673552,0.500000000000007);
#3366=ELLIPSE('',#10527,0.300560606116854,0.3);
#3367=ELLIPSE('',#10529,0.200373737411236,0.2);
#3368=ELLIPSE('',#10535,0.200373737411236,0.2);
#3369=ELLIPSE('',#10537,0.500336564673552,0.500000000000007);
#3370=ELLIPSE('',#10538,0.300560606116854,0.3);
#3371=ELLIPSE('',#10542,1.83221745488836,1.82880000000002);
#3372=ELLIPSE('',#10547,0.500171535589749,0.500000000000007);
#3373=ELLIPSE('',#10548,0.300285805548996,0.3);
#3374=ELLIPSE('',#10549,1.83017178806936,1.82880000000001);
#3375=ELLIPSE('',#10550,2.03003664347347,2.02880000000002);
#3376=ELLIPSE('',#10554,0.300285805548996,0.3);
#3377=ELLIPSE('',#10555,0.500171535589749,0.500000000000007);
#3378=ELLIPSE('',#10556,0.283061001412584,0.226372357315972);
#3379=ELLIPSE('',#10558,0.500171535589749,0.500000000000007);
#3380=ELLIPSE('',#10560,0.200373737411236,0.2);
#3381=ELLIPSE('',#10561,0.226960152551856,0.202105119243004);
#3382=ELLIPSE('',#10562,0.500171535589749,0.500000000000007);
#3383=ELLIPSE('',#10565,0.200373737411236,0.2);
#3384=ELLIPSE('',#10567,0.50033656467355,0.500000000000007);
#3385=ELLIPSE('',#10568,0.50033656467355,0.500000000000007);
#3386=ELLIPSE('',#10570,1.50182807625857,1.49999999999999);
#3387=ELLIPSE('',#10571,1.50182807625857,1.49999999999999);
#3388=ELLIPSE('',#10574,1.83221745488836,1.82880000000002);
#3389=ELLIPSE('',#10578,0.500171535589749,0.500000000000007);
#3390=ELLIPSE('',#10579,0.300285805548996,0.3);
#3391=ELLIPSE('',#10580,1.83017178806936,1.82880000000001);
#3392=ELLIPSE('',#10581,2.03003664347347,2.02880000000002);
#3393=ELLIPSE('',#10585,0.300560606116854,0.3);
#3394=ELLIPSE('',#10586,0.283045780160479,0.226366276742268);
#3395=ELLIPSE('',#10588,0.500171535589749,0.500000000000007);
#3396=ELLIPSE('',#10590,0.200373737411236,0.2);
#3397=ELLIPSE('',#10591,0.228518999909674,0.202828501537107);
#3398=ELLIPSE('',#10594,0.200373737411236,0.2);
#3399=ELLIPSE('',#10599,1.83221745488836,1.82880000000002);
#3400=ELLIPSE('',#10601,1.00003808418626,0.999999999999996);
#3401=ELLIPSE('',#10603,0.500076164021969,0.500000000000015);
#3402=ELLIPSE('',#10604,0.945751709553454,0.42400183749578);
#3403=ELLIPSE('',#10612,0.945571521045751,0.42383401178261);
#3404=ELLIPSE('',#10617,1.39016715670294,1.);
#3405=ELLIPSE('',#10619,1.0007617795627,1.);
#3406=ELLIPSE('',#10620,8.74309348745403,7.52489260394552);
#3407=ELLIPSE('',#10621,11.001675608483,11.);
#3408=ELLIPSE('',#10623,1.00003808418626,0.999999999999996);
#3409=ELLIPSE('',#10625,0.500076164021947,0.499999999999993);
#3410=ELLIPSE('',#10635,1.50114266934408,1.5);
#3411=ELLIPSE('',#10636,1.00171318935385,1.);
#3412=ELLIPSE('',#10640,8.74309348745613,7.52489260394924);
#3413=ELLIPSE('',#10641,11.001675608483,11.);
#3414=ELLIPSE('',#10643,1.39016715670295,1.);
#3415=ELLIPSE('',#10647,1.00171318935385,1.);
#3416=ELLIPSE('',#10648,1.50114266934408,1.5);
#3417=ELLIPSE('',#10651,1.50182807625857,1.49999999999999);
#3418=ELLIPSE('',#10655,1.50182807625857,1.49999999999999);
#3419=ELLIPSE('',#10657,1.00274003143314,0.999999999999998);
#3420=ELLIPSE('',#10663,1.99090322420423,1.99060000000002);
#3421=ELLIPSE('',#10674,1.99090322420423,1.99060000000002);
#3422=ELLIPSE('',#10678,1.00274003143315,0.999999999999986);
#3423=ELLIPSE('',#10679,1.00030481857829,0.999999999999986);
#3424=ELLIPSE('',#10681,0.500609358752846,0.499999999999988);
#3425=ELLIPSE('',#10685,0.500609358752864,0.500000000000006);
#3426=ELLIPSE('',#10686,1.0003048185783,0.999999999999998);
#3427=ELLIPSE('',#10706,8.74309348745395,7.52489260394539);
#3428=ELLIPSE('',#10707,0.945116632543062,0.42340881102184);
#3429=ELLIPSE('',#10708,0.945177738303165,0.423465473041401);
#3430=ELLIPSE('',#10709,8.74309348746913,7.52489260397247);
#3431=ELLIPSE('',#10714,1.00076177956274,1.);
#3432=ELLIPSE('',#10731,0.200373737411236,0.2);
#3433=ELLIPSE('',#10733,0.500336564673552,0.500000000000007);
#3434=ELLIPSE('',#10734,0.300560606116854,0.3);
#3435=ELLIPSE('',#10737,0.500336564673552,0.500000000000007);
#3436=ELLIPSE('',#10738,0.300560606116854,0.3);
#3437=ELLIPSE('',#10740,0.200373737411236,0.2);
#3438=ELLIPSE('',#10743,1.83221745488836,1.82880000000002);
#3439=ELLIPSE('',#10748,0.500336564673552,0.500000000000007);
#3440=ELLIPSE('',#10749,0.300560606116854,0.3);
#3441=ELLIPSE('',#10751,0.200373737411236,0.2);
#3442=ELLIPSE('',#10757,0.200373737411236,0.2);
#3443=ELLIPSE('',#10759,0.500336564673552,0.500000000000007);
#3444=ELLIPSE('',#10760,0.300560606116854,0.3);
#3445=ELLIPSE('',#10764,1.83221745488836,1.82880000000002);
#3446=ELLIPSE('',#10769,0.500171535589749,0.500000000000007);
#3447=ELLIPSE('',#10770,0.300285805548996,0.3);
#3448=ELLIPSE('',#10771,1.83017178806936,1.82880000000001);
#3449=ELLIPSE('',#10772,2.03003664347347,2.02880000000002);
#3450=ELLIPSE('',#10776,0.300285805548996,0.3);
#3451=ELLIPSE('',#10777,0.500171535589749,0.500000000000007);
#3452=ELLIPSE('',#10778,0.28320630634259,0.226430562861141);
#3453=ELLIPSE('',#10780,0.500171535589749,0.500000000000007);
#3454=ELLIPSE('',#10782,0.200373737411236,0.2);
#3455=ELLIPSE('',#10783,0.227088789163874,0.202173589286037);
#3456=ELLIPSE('',#10784,0.500171535589749,0.500000000000007);
#3457=ELLIPSE('',#10787,0.200373737411236,0.2);
#3458=ELLIPSE('',#10789,0.50033656467355,0.500000000000007);
#3459=ELLIPSE('',#10790,0.50033656467355,0.500000000000007);
#3460=ELLIPSE('',#10792,1.50182807625857,1.49999999999999);
#3461=ELLIPSE('',#10793,1.50182807625857,1.49999999999999);
#3462=ELLIPSE('',#10796,1.83221745488836,1.82880000000002);
#3463=ELLIPSE('',#10800,0.500171535589749,0.500000000000007);
#3464=ELLIPSE('',#10801,0.300285805548996,0.3);
#3465=ELLIPSE('',#10802,1.83017178806936,1.82880000000001);
#3466=ELLIPSE('',#10803,2.03003664347347,2.02880000000002);
#3467=ELLIPSE('',#10807,0.300560606116854,0.3);
#3468=ELLIPSE('',#10808,0.28320310619285,0.226429383924161);
#3469=ELLIPSE('',#10810,0.500171535589749,0.500000000000007);
#3470=ELLIPSE('',#10812,0.200373737411236,0.2);
#3471=ELLIPSE('',#10813,0.228653264072653,0.202898431684534);
#3472=ELLIPSE('',#10816,0.200373737411236,0.2);
#3473=ELLIPSE('',#10821,1.83221745488836,1.82880000000002);
#3474=ELLIPSE('',#10823,1.00003808418626,0.999999999999996);
#3475=ELLIPSE('',#10825,0.500076164021969,0.500000000000015);
#3476=ELLIPSE('',#10837,1.39016715670294,1.);
#3477=ELLIPSE('',#10839,11.001675608483,11.);
#3478=ELLIPSE('',#10841,1.00003808418626,0.999999999999996);
#3479=ELLIPSE('',#10843,0.500076164021947,0.499999999999993);
#3480=ELLIPSE('',#10853,1.50114266934408,1.5);
#3481=ELLIPSE('',#10854,1.00171318935385,1.);
#3482=ELLIPSE('',#10858,11.001675608483,11.);
#3483=ELLIPSE('',#10860,1.39016715670295,1.);
#3484=ELLIPSE('',#10864,1.00171318935385,1.);
#3485=ELLIPSE('',#10865,1.50114266934408,1.5);
#3486=ELLIPSE('',#10868,1.50182807625857,1.49999999999999);
#3487=ELLIPSE('',#10872,1.50182807625857,1.49999999999999);
#3488=ELLIPSE('',#10874,1.00274003143314,0.999999999999998);
#3489=ELLIPSE('',#10880,1.99090322420423,1.99060000000002);
#3490=ELLIPSE('',#10891,1.99090322420423,1.99060000000002);
#3491=ELLIPSE('',#10895,1.00274003143315,0.999999999999986);
#3492=ELLIPSE('',#10896,1.00030481857829,0.999999999999986);
#3493=ELLIPSE('',#10898,0.500609358752846,0.499999999999988);
#3494=ELLIPSE('',#10902,0.500609358752864,0.500000000000006);
#3495=ELLIPSE('',#10903,1.0003048185783,0.999999999999998);
#3496=CIRCLE('',#9987,0.5);
#3497=CIRCLE('',#9989,0.50000000000003);
#3498=CIRCLE('',#9992,0.50000000000003);
#3499=CIRCLE('',#9993,0.499999999999977);
#3500=CIRCLE('',#9997,0.499999999999994);
#3501=CIRCLE('',#10003,0.5);
#3502=CIRCLE('',#10005,0.50000000000003);
#3503=CIRCLE('',#10008,0.500000000000012);
#3504=CIRCLE('',#10009,0.499999999999959);
#3505=CIRCLE('',#10013,0.499999999999994);
#3506=CIRCLE('',#10019,0.499999999999992);
#3507=CIRCLE('',#10021,0.50000000000003);
#3508=CIRCLE('',#10024,0.500000000000012);
#3509=CIRCLE('',#10025,0.499999999999976);
#3510=CIRCLE('',#10029,0.499999999999994);
#3511=CIRCLE('',#10035,0.499999999999992);
#3512=CIRCLE('',#10037,0.50000000000003);
#3513=CIRCLE('',#10040,0.50000000000003);
#3514=CIRCLE('',#10041,0.499999999999958);
#3515=CIRCLE('',#10045,0.499999999999994);
#3516=CIRCLE('',#10053,0.200000000000007);
#3517=CIRCLE('',#10055,2.02880000000002);
#3518=CIRCLE('',#10056,1.82880000000002);
#3519=CIRCLE('',#10058,0.200000000000007);
#3520=CIRCLE('',#10060,0.200000000000007);
#3521=CIRCLE('',#10064,0.199999999999971);
#3522=CIRCLE('',#10074,0.200000000000007);
#3523=CIRCLE('',#10075,0.200000000000007);
#3524=CIRCLE('',#10081,1.82880000000002);
#3525=CIRCLE('',#10082,2.02880000000002);
#3526=CIRCLE('',#10084,0.200000000000007);
#3527=CIRCLE('',#10086,0.200000000000007);
#3528=CIRCLE('',#10095,0.200000000000017);
#3529=CIRCLE('',#10096,0.200000000000053);
#3530=CIRCLE('',#10102,0.200000000000005);
#3531=CIRCLE('',#10103,0.199999999999996);
#3532=CIRCLE('',#10107,0.200000000000017);
#3533=CIRCLE('',#10113,0.2);
#3534=CIRCLE('',#10126,0.200000000000017);
#3535=CIRCLE('',#10127,0.200000000000017);
#3536=CIRCLE('',#10133,0.200000000000005);
#3537=CIRCLE('',#10134,0.2);
#3538=CIRCLE('',#10137,0.200000000000017);
#3539=CIRCLE('',#10142,0.2);
#3540=CIRCLE('',#10146,0.499999999999998);
#3541=CIRCLE('',#10150,0.499999999999985);
#3542=CIRCLE('',#10152,0.5);
#3543=CIRCLE('',#10155,1.);
#3544=CIRCLE('',#10156,1.00000000000001);
#3545=CIRCLE('',#10158,1.00000000000001);
#3546=CIRCLE('',#10159,1.);
#3547=CIRCLE('',#10160,0.999999999999979);
#3548=CIRCLE('',#10163,0.99999999999997);
#3549=CIRCLE('',#10164,1.);
#3550=CIRCLE('',#10168,1.00000000000001);
#3551=CIRCLE('',#10172,0.500000000000007);
#3552=CIRCLE('',#10174,0.5);
#3553=CIRCLE('',#10177,1.);
#3554=CIRCLE('',#10178,1.00000000000001);
#3555=CIRCLE('',#10179,0.999999999999996);
#3556=CIRCLE('',#10184,0.499999999999985);
#3557=CIRCLE('',#10189,1.00000000000001);
#3558=CIRCLE('',#10197,0.5);
#3559=CIRCLE('',#10200,0.499999999999994);
#3560=CIRCLE('',#10201,0.499999999999998);
#3561=CIRCLE('',#10204,0.499999999999998);
#3562=CIRCLE('',#10207,0.499999999999994);
#3563=CIRCLE('',#10210,1.0000000002444);
#3564=CIRCLE('',#10212,0.999999996867422);
#3565=CIRCLE('',#10216,1.00000000000001);
#3566=CIRCLE('',#10220,1.);
#3567=CIRCLE('',#10223,1.00000000000001);
#3568=CIRCLE('',#10224,1.00000000000001);
#3569=CIRCLE('',#10228,0.499999999999994);
#3570=CIRCLE('',#10231,0.5);
#3571=CIRCLE('',#10233,0.500000000000012);
#3572=CIRCLE('',#10234,0.499999999999994);
#3573=CIRCLE('',#10235,0.499999999999998);
#3574=CIRCLE('',#10238,0.5);
#3575=CIRCLE('',#10256,0.34311225192926);
#3576=CIRCLE('',#10257,0.34311225192926);
#3577=CIRCLE('',#10258,0.34311225192926);
#3578=CIRCLE('',#10259,0.34311225192926);
#3579=CIRCLE('',#10261,9.99999999999999);
#3580=CIRCLE('',#10266,9.99999999999999);
#3581=CIRCLE('',#10272,10.5239183875579);
#3582=CIRCLE('',#10273,10.5239183875579);
#3583=CIRCLE('',#10275,15.2738743890003);
#3584=CIRCLE('',#10276,15.2738743890003);
#3585=CIRCLE('',#10281,0.990600000000022);
#3586=CIRCLE('',#10287,0.200000000000007);
#3587=CIRCLE('',#10289,2.02880000000002);
#3588=CIRCLE('',#10290,1.82880000000002);
#3589=CIRCLE('',#10292,0.200000000000007);
#3590=CIRCLE('',#10294,0.200000000000007);
#3591=CIRCLE('',#10298,0.199999999999971);
#3592=CIRCLE('',#10308,0.200000000000007);
#3593=CIRCLE('',#10309,0.200000000000007);
#3594=CIRCLE('',#10315,1.82880000000002);
#3595=CIRCLE('',#10316,2.02880000000002);
#3596=CIRCLE('',#10318,0.200000000000007);
#3597=CIRCLE('',#10320,0.200000000000007);
#3598=CIRCLE('',#10329,0.200000000000017);
#3599=CIRCLE('',#10330,0.200000000000053);
#3600=CIRCLE('',#10336,0.200000000000005);
#3601=CIRCLE('',#10337,0.199999999999996);
#3602=CIRCLE('',#10341,0.200000000000017);
#3603=CIRCLE('',#10347,0.2);
#3604=CIRCLE('',#10360,0.200000000000017);
#3605=CIRCLE('',#10361,0.200000000000017);
#3606=CIRCLE('',#10367,0.200000000000005);
#3607=CIRCLE('',#10368,0.2);
#3608=CIRCLE('',#10371,0.200000000000017);
#3609=CIRCLE('',#10376,0.2);
#3610=CIRCLE('',#10380,0.499999999999998);
#3611=CIRCLE('',#10384,0.499999999999985);
#3612=CIRCLE('',#10386,0.5);
#3613=CIRCLE('',#10388,1.);
#3614=CIRCLE('',#10389,1.00000000000001);
#3615=CIRCLE('',#10391,1.00000000000001);
#3616=CIRCLE('',#10392,1.);
#3617=CIRCLE('',#10393,0.999999999999979);
#3618=CIRCLE('',#10395,0.99999999999997);
#3619=CIRCLE('',#10396,1.);
#3620=CIRCLE('',#10400,1.00000000000001);
#3621=CIRCLE('',#10402,0.500000000000007);
#3622=CIRCLE('',#10404,0.5);
#3623=CIRCLE('',#10407,1.);
#3624=CIRCLE('',#10408,1.00000000000001);
#3625=CIRCLE('',#10409,0.999999999999996);
#3626=CIRCLE('',#10414,0.499999999999985);
#3627=CIRCLE('',#10419,1.00000000000001);
#3628=CIRCLE('',#10426,0.5);
#3629=CIRCLE('',#10429,0.499999999999994);
#3630=CIRCLE('',#10430,0.499999999999998);
#3631=CIRCLE('',#10433,0.499999999999998);
#3632=CIRCLE('',#10436,0.499999999999994);
#3633=CIRCLE('',#10439,1.0000000002444);
#3634=CIRCLE('',#10441,0.999999996867422);
#3635=CIRCLE('',#10445,1.00000000000001);
#3636=CIRCLE('',#10449,1.);
#3637=CIRCLE('',#10452,1.00000000000001);
#3638=CIRCLE('',#10453,1.00000000000001);
#3639=CIRCLE('',#10457,0.499999999999994);
#3640=CIRCLE('',#10460,0.5);
#3641=CIRCLE('',#10462,0.500000000000012);
#3642=CIRCLE('',#10463,0.499999999999994);
#3643=CIRCLE('',#10464,0.499999999999998);
#3644=CIRCLE('',#10467,0.5);
#3645=CIRCLE('',#10486,15.2738743890003);
#3646=CIRCLE('',#10487,15.2738743890003);
#3647=CIRCLE('',#10489,10.5239183875579);
#3648=CIRCLE('',#10490,10.5239183875579);
#3649=CIRCLE('',#10493,0.990600000000022);
#3650=CIRCLE('',#10495,0.45720000006189);
#3651=CIRCLE('',#10496,0.45720000006189);
#3652=CIRCLE('',#10499,0.457200000004114);
#3653=CIRCLE('',#10500,0.457200000004114);
#3654=CIRCLE('',#10503,0.200000000000007);
#3655=CIRCLE('',#10505,2.02880000000002);
#3656=CIRCLE('',#10506,1.82880000000002);
#3657=CIRCLE('',#10508,0.200000000000007);
#3658=CIRCLE('',#10510,0.200000000000007);
#3659=CIRCLE('',#10514,0.199999999999971);
#3660=CIRCLE('',#10524,0.200000000000007);
#3661=CIRCLE('',#10525,0.200000000000007);
#3662=CIRCLE('',#10531,1.82880000000002);
#3663=CIRCLE('',#10532,2.02880000000002);
#3664=CIRCLE('',#10534,0.200000000000007);
#3665=CIRCLE('',#10536,0.200000000000007);
#3666=CIRCLE('',#10545,0.200000000000017);
#3667=CIRCLE('',#10546,0.200000000000053);
#3668=CIRCLE('',#10552,0.200000000000005);
#3669=CIRCLE('',#10553,0.199999999999996);
#3670=CIRCLE('',#10557,0.200000000000017);
#3671=CIRCLE('',#10563,0.2);
#3672=CIRCLE('',#10576,0.200000000000017);
#3673=CIRCLE('',#10577,0.200000000000017);
#3674=CIRCLE('',#10583,0.200000000000005);
#3675=CIRCLE('',#10584,0.2);
#3676=CIRCLE('',#10587,0.200000000000017);
#3677=CIRCLE('',#10592,0.2);
#3678=CIRCLE('',#10596,0.499999999999998);
#3679=CIRCLE('',#10600,0.499999999999985);
#3680=CIRCLE('',#10602,0.5);
#3681=CIRCLE('',#10605,1.);
#3682=CIRCLE('',#10606,1.00000000000001);
#3683=CIRCLE('',#10608,1.00000000000001);
#3684=CIRCLE('',#10609,1.);
#3685=CIRCLE('',#10610,0.999999999999979);
#3686=CIRCLE('',#10613,0.99999999999997);
#3687=CIRCLE('',#10614,1.);
#3688=CIRCLE('',#10618,1.00000000000001);
#3689=CIRCLE('',#10622,0.500000000000007);
#3690=CIRCLE('',#10624,0.5);
#3691=CIRCLE('',#10627,1.);
#3692=CIRCLE('',#10628,1.00000000000001);
#3693=CIRCLE('',#10629,0.999999999999996);
#3694=CIRCLE('',#10634,0.499999999999985);
#3695=CIRCLE('',#10639,1.00000000000001);
#3696=CIRCLE('',#10646,0.5);
#3697=CIRCLE('',#10649,0.499999999999994);
#3698=CIRCLE('',#10650,0.499999999999998);
#3699=CIRCLE('',#10653,0.499999999999998);
#3700=CIRCLE('',#10656,0.499999999999994);
#3701=CIRCLE('',#10659,1.0000000002444);
#3702=CIRCLE('',#10661,0.999999996867422);
#3703=CIRCLE('',#10665,1.00000000000001);
#3704=CIRCLE('',#10669,1.);
#3705=CIRCLE('',#10672,1.00000000000001);
#3706=CIRCLE('',#10673,1.00000000000001);
#3707=CIRCLE('',#10677,0.499999999999994);
#3708=CIRCLE('',#10680,0.5);
#3709=CIRCLE('',#10682,0.500000000000012);
#3710=CIRCLE('',#10683,0.499999999999994);
#3711=CIRCLE('',#10684,0.499999999999998);
#3712=CIRCLE('',#10687,0.5);
#3713=CIRCLE('',#10705,10.);
#3714=CIRCLE('',#10710,10.);
#3715=CIRCLE('',#10718,0.990600000000022);
#3716=CIRCLE('',#10725,0.200000000000007);
#3717=CIRCLE('',#10727,2.02880000000002);
#3718=CIRCLE('',#10728,1.82880000000002);
#3719=CIRCLE('',#10730,0.200000000000007);
#3720=CIRCLE('',#10732,0.200000000000007);
#3721=CIRCLE('',#10736,0.199999999999971);
#3722=CIRCLE('',#10746,0.200000000000007);
#3723=CIRCLE('',#10747,0.200000000000007);
#3724=CIRCLE('',#10753,1.82880000000002);
#3725=CIRCLE('',#10754,2.02880000000002);
#3726=CIRCLE('',#10756,0.200000000000007);
#3727=CIRCLE('',#10758,0.200000000000007);
#3728=CIRCLE('',#10767,0.200000000000017);
#3729=CIRCLE('',#10768,0.200000000000053);
#3730=CIRCLE('',#10774,0.200000000000005);
#3731=CIRCLE('',#10775,0.199999999999996);
#3732=CIRCLE('',#10779,0.200000000000017);
#3733=CIRCLE('',#10785,0.2);
#3734=CIRCLE('',#10798,0.200000000000017);
#3735=CIRCLE('',#10799,0.200000000000017);
#3736=CIRCLE('',#10805,0.200000000000005);
#3737=CIRCLE('',#10806,0.2);
#3738=CIRCLE('',#10809,0.200000000000017);
#3739=CIRCLE('',#10814,0.2);
#3740=CIRCLE('',#10818,0.499999999999998);
#3741=CIRCLE('',#10822,0.499999999999985);
#3742=CIRCLE('',#10824,0.5);
#3743=CIRCLE('',#10826,1.);
#3744=CIRCLE('',#10827,1.00000000000001);
#3745=CIRCLE('',#10829,1.00000000000001);
#3746=CIRCLE('',#10830,1.);
#3747=CIRCLE('',#10831,0.999999999999979);
#3748=CIRCLE('',#10833,0.99999999999997);
#3749=CIRCLE('',#10834,1.);
#3750=CIRCLE('',#10838,1.00000000000001);
#3751=CIRCLE('',#10840,0.500000000000007);
#3752=CIRCLE('',#10842,0.5);
#3753=CIRCLE('',#10845,1.);
#3754=CIRCLE('',#10846,1.00000000000001);
#3755=CIRCLE('',#10847,0.999999999999996);
#3756=CIRCLE('',#10852,0.499999999999985);
#3757=CIRCLE('',#10857,1.00000000000001);
#3758=CIRCLE('',#10863,0.5);
#3759=CIRCLE('',#10866,0.499999999999994);
#3760=CIRCLE('',#10867,0.499999999999998);
#3761=CIRCLE('',#10870,0.499999999999998);
#3762=CIRCLE('',#10873,0.499999999999994);
#3763=CIRCLE('',#10876,1.0000000002444);
#3764=CIRCLE('',#10878,0.999999996867422);
#3765=CIRCLE('',#10882,1.00000000000001);
#3766=CIRCLE('',#10886,1.);
#3767=CIRCLE('',#10889,1.00000000000001);
#3768=CIRCLE('',#10890,1.00000000000001);
#3769=CIRCLE('',#10894,0.499999999999994);
#3770=CIRCLE('',#10897,0.5);
#3771=CIRCLE('',#10899,0.500000000000012);
#3772=CIRCLE('',#10900,0.499999999999994);
#3773=CIRCLE('',#10901,0.499999999999998);
#3774=CIRCLE('',#10904,0.5);
#3775=CIRCLE('',#10924,0.990600000000022);
#3776=CIRCLE('',#10926,0.45720000006189);
#3777=CIRCLE('',#10927,0.45720000006189);
#3778=CIRCLE('',#10930,0.457200000004114);
#3779=CIRCLE('',#10931,0.457200000004114);
#3780=CIRCLE('',#10933,23.238);
#3781=CIRCLE('',#10934,23.238);
#3782=CIRCLE('',#10935,23.238);
#3783=CIRCLE('',#10936,1.20009064338825);
#3784=CIRCLE('',#10938,6.49999999999998);
#3785=CIRCLE('',#10939,6.5);
#3786=CIRCLE('',#10941,10.3370205221202);
#3787=CIRCLE('',#10944,6.71906333937813);
#3788=CIRCLE('',#10945,7.09375783821553);
#3789=CIRCLE('',#10947,13.2018786974168);
#3790=CIRCLE('',#10948,0.457200000012143);
#3791=CIRCLE('',#10949,12.7446786974071);
#3792=CIRCLE('',#10950,0.457200000012143);
#3793=CIRCLE('',#10952,13.2018786974016);
#3794=CIRCLE('',#10954,13.6590786826962);
#3795=CIRCLE('',#10955,0.457200001058969);
#3796=CIRCLE('',#10956,0.457200001058969);
#3797=CIRCLE('',#10958,16.4225478323467);
#3798=CIRCLE('',#10960,16.2638709421531);
#3799=CIRCLE('',#10963,23.238);
#3800=CIRCLE('',#10964,23.238);
#3801=CIRCLE('',#10965,23.238);
#3802=CIRCLE('',#10967,27.238);
#3803=CIRCLE('',#10968,4.);
#3804=CIRCLE('',#10970,0.223022963754037);
#3805=CIRCLE('',#10971,0.223022963754037);
#3806=CIRCLE('',#10972,0.223022963754037);
#3807=CIRCLE('',#10973,0.223022963754037);
#3808=CIRCLE('',#10974,27.238);
#3809=CIRCLE('',#10976,4.);
#3810=CIRCLE('',#10978,10.3370205221202);
#3811=CIRCLE('',#10981,0.990600000000022);
#3812=CIRCLE('',#10982,16.2638709421531);
#3813=CIRCLE('',#10984,6.71906333937814);
#3814=CIRCLE('',#10985,7.09375783821549);
#3815=CIRCLE('',#10988,6.71906333937814);
#3816=CIRCLE('',#10989,7.09375783821551);
#3817=CIRCLE('',#10991,10.);
#3818=CIRCLE('',#10993,10.);
#3819=CIRCLE('',#10995,12.7446786974071);
#3820=CIRCLE('',#10996,12.7446786974071);
#3821=CIRCLE('',#10997,12.744678697407);
#3822=CIRCLE('',#10998,10.1284786974306);
#3823=CIRCLE('',#10999,10.1284786974306);
#3824=CIRCLE('',#11000,10.1284786974306);
#3825=CIRCLE('',#11001,10.1284786974306);
#3826=CIRCLE('',#11003,22.238);
#3827=CIRCLE('',#11004,1.);
#3828=CIRCLE('',#11006,14.0000002086163);
#3829=CIRCLE('',#11008,14.5459555600156);
#3830=CIRCLE('',#11013,0.457200001058969);
#3831=CIRCLE('',#11016,0.457200000012143);
#3832=CIRCLE('',#11020,10.3370205221202);
#3833=CIRCLE('',#11022,6.49999999999998);
#3834=CIRCLE('',#11023,6.49999999999998);
#3835=CIRCLE('',#11026,0.457200000012143);
#3836=CIRCLE('',#11027,0.457200000012143);
#3837=CIRCLE('',#11030,0.457200001058969);
#3838=CIRCLE('',#11031,0.457200001058969);
#3839=CIRCLE('',#11035,14.5459555600156);
#3840=CIRCLE('',#11037,14.0000002086163);
#3841=CIRCLE('',#11039,22.238);
#3842=CIRCLE('',#11041,1.);
#3843=CIRCLE('',#11043,16.2638709421531);
#3844=CIRCLE('',#11044,16.4225478323467);
#3845=CIRCLE('',#11046,0.990600000000022);
#3846=CIRCLE('',#11048,9.21407880044562);
#3847=CIRCLE('',#11050,0.45720000006189);
#3848=CIRCLE('',#11051,9.67127869739369);
#3849=CIRCLE('',#11053,9.67127869741836);
#3850=CIRCLE('',#11055,0.457200000004114);
#3851=CIRCLE('',#11057,0.457200000012143);
#3852=CIRCLE('',#11058,13.2018786974167);
#3853=CIRCLE('',#11060,13.2018786974015);
#3854=CIRCLE('',#11062,0.457200001058969);
#3855=CIRCLE('',#11063,13.6590786826962);
#3856=CIRCLE('',#11067,0.990600000000022);
#3857=CIRCLE('',#11070,0.45720000006189);
#3858=CIRCLE('',#11073,0.457200000004114);
#3859=CIRCLE('',#11075,0.457200000012143);
#3860=CIRCLE('',#11078,0.457200001058969);
#3861=CIRCLE('',#11082,16.4225478323467);
#3862=CIRCLE('',#11083,16.2638709421531);
#3863=CIRCLE('',#11086,9.21407880044564);
#3864=CIRCLE('',#11088,9.67127869739372);
#3865=CIRCLE('',#11090,9.67127869741838);
#3866=CIRCLE('',#11093,13.2018786974167);
#3867=CIRCLE('',#11095,13.2018786974015);
#3868=CIRCLE('',#11097,13.6590786826962);
#3869=CIRCLE('',#11100,16.4225478323467);
#3870=CIRCLE('',#11102,7.0937578382155);
#3871=CIRCLE('',#11103,9.21407880044566);
#3872=CIRCLE('',#11105,0.45720000006189);
#3873=CIRCLE('',#11106,9.67127869739375);
#3874=CIRCLE('',#11108,9.67127869741837);
#3875=CIRCLE('',#11110,0.457200000004114);
#3876=CIRCLE('',#11112,13.2018786974168);
#3877=CIRCLE('',#11113,0.457200000012143);
#3878=CIRCLE('',#11115,13.2018786974016);
#3879=CIRCLE('',#11117,13.6590786826962);
#3880=CIRCLE('',#11118,0.457200001058969);
#3881=CIRCLE('',#11122,0.990600000000022);
#3882=CIRCLE('',#11126,0.45720000006189);
#3883=CIRCLE('',#11129,0.457200000004114);
#3884=CIRCLE('',#11137,9.21407880044566);
#3885=CIRCLE('',#11139,9.67127869739375);
#3886=CIRCLE('',#11141,9.67127869741837);
#3887=CIRCLE('',#11144,6.71906333937813);
#3888=CIRCLE('',#11145,1.20077067895039);
#3889=CIRCLE('',#11146,9.99999999999996);
#3890=CIRCLE('',#11149,10.3370205221202);
#3891=CIRCLE('',#11150,9.99999999999999);
#3892=CIRCLE('',#11152,6.5);
#3893=CIRCLE('',#11154,6.49999999999998);
#3894=CIRCLE('',#11155,6.5);
#3895=CIRCLE('',#11157,6.49999999999998);
#3896=VERTEX_POINT('',#14204);
#3897=VERTEX_POINT('',#14205);
#3898=VERTEX_POINT('',#14207);
#3899=VERTEX_POINT('',#14209);
#3900=VERTEX_POINT('',#14213);
#3901=VERTEX_POINT('',#14214);
#3902=VERTEX_POINT('',#14243);
#3903=VERTEX_POINT('',#14244);
#3904=VERTEX_POINT('',#14249);
#3905=VERTEX_POINT('',#14251);
#3906=VERTEX_POINT('',#14255);
#3907=VERTEX_POINT('',#14257);
#3908=VERTEX_POINT('',#14261);
#3909=VERTEX_POINT('',#14265);
#3910=VERTEX_POINT('',#14293);
#3911=VERTEX_POINT('',#14294);
#3912=VERTEX_POINT('',#14296);
#3913=VERTEX_POINT('',#14298);
#3914=VERTEX_POINT('',#14302);
#3915=VERTEX_POINT('',#14303);
#3916=VERTEX_POINT('',#14332);
#3917=VERTEX_POINT('',#14333);
#3918=VERTEX_POINT('',#14338);
#3919=VERTEX_POINT('',#14340);
#3920=VERTEX_POINT('',#14344);
#3921=VERTEX_POINT('',#14346);
#3922=VERTEX_POINT('',#14350);
#3923=VERTEX_POINT('',#14354);
#3924=VERTEX_POINT('',#14382);
#3925=VERTEX_POINT('',#14383);
#3926=VERTEX_POINT('',#14385);
#3927=VERTEX_POINT('',#14387);
#3928=VERTEX_POINT('',#14391);
#3929=VERTEX_POINT('',#14392);
#3930=VERTEX_POINT('',#14421);
#3931=VERTEX_POINT('',#14422);
#3932=VERTEX_POINT('',#14427);
#3933=VERTEX_POINT('',#14429);
#3934=VERTEX_POINT('',#14433);
#3935=VERTEX_POINT('',#14435);
#3936=VERTEX_POINT('',#14439);
#3937=VERTEX_POINT('',#14443);
#3938=VERTEX_POINT('',#14471);
#3939=VERTEX_POINT('',#14472);
#3940=VERTEX_POINT('',#14474);
#3941=VERTEX_POINT('',#14476);
#3942=VERTEX_POINT('',#14480);
#3943=VERTEX_POINT('',#14481);
#3944=VERTEX_POINT('',#14510);
#3945=VERTEX_POINT('',#14511);
#3946=VERTEX_POINT('',#14516);
#3947=VERTEX_POINT('',#14518);
#3948=VERTEX_POINT('',#14522);
#3949=VERTEX_POINT('',#14524);
#3950=VERTEX_POINT('',#14528);
#3951=VERTEX_POINT('',#14532);
#3952=VERTEX_POINT('',#14536);
#3953=VERTEX_POINT('',#14540);
#3954=VERTEX_POINT('',#14541);
#3955=VERTEX_POINT('',#14543);
#3956=VERTEX_POINT('',#14545);
#3957=VERTEX_POINT('',#14564);
#3958=VERTEX_POINT('',#14566);
#3959=VERTEX_POINT('',#14585);
#3960=VERTEX_POINT('',#14586);
#3961=VERTEX_POINT('',#14588);
#3962=VERTEX_POINT('',#14590);
#3963=VERTEX_POINT('',#14618);
#3964=VERTEX_POINT('',#14619);
#3965=VERTEX_POINT('',#14651);
#3966=VERTEX_POINT('',#14652);
#3967=VERTEX_POINT('',#14657);
#3968=VERTEX_POINT('',#14658);
#3969=VERTEX_POINT('',#14663);
#3970=VERTEX_POINT('',#14665);
#3971=VERTEX_POINT('',#14669);
#3972=VERTEX_POINT('',#14673);
#3973=VERTEX_POINT('',#14677);
#3974=VERTEX_POINT('',#14678);
#3975=VERTEX_POINT('',#14680);
#3976=VERTEX_POINT('',#14682);
#3977=VERTEX_POINT('',#14725);
#3978=VERTEX_POINT('',#14726);
#3979=VERTEX_POINT('',#14731);
#3980=VERTEX_POINT('',#14732);
#3981=VERTEX_POINT('',#14737);
#3982=VERTEX_POINT('',#14739);
#3983=VERTEX_POINT('',#14758);
#3984=VERTEX_POINT('',#14759);
#3985=VERTEX_POINT('',#14761);
#3986=VERTEX_POINT('',#14763);
#3987=VERTEX_POINT('',#14791);
#3988=VERTEX_POINT('',#14792);
#3989=VERTEX_POINT('',#14800);
#3990=VERTEX_POINT('',#14802);
#3991=VERTEX_POINT('',#14806);
#3992=VERTEX_POINT('',#14810);
#3993=VERTEX_POINT('',#14814);
#3994=VERTEX_POINT('',#14815);
#3995=VERTEX_POINT('',#14817);
#3996=VERTEX_POINT('',#14819);
#3997=VERTEX_POINT('',#14868);
#3998=VERTEX_POINT('',#14869);
#3999=VERTEX_POINT('',#14908);
#4000=VERTEX_POINT('',#14910);
#4001=VERTEX_POINT('',#14935);
#4002=VERTEX_POINT('',#14937);
#4003=VERTEX_POINT('',#14965);
#4004=VERTEX_POINT('',#14966);
#4005=VERTEX_POINT('',#14990);
#4006=VERTEX_POINT('',#14992);
#4007=VERTEX_POINT('',#14996);
#4008=VERTEX_POINT('',#15019);
#4009=VERTEX_POINT('',#15021);
#4010=VERTEX_POINT('',#15025);
#4011=VERTEX_POINT('',#15029);
#4012=VERTEX_POINT('',#15031);
#4013=VERTEX_POINT('',#15033);
#4014=VERTEX_POINT('',#15038);
#4015=VERTEX_POINT('',#15040);
#4016=VERTEX_POINT('',#15042);
#4017=VERTEX_POINT('',#15044);
#4018=VERTEX_POINT('',#15046);
#4019=VERTEX_POINT('',#15048);
#4020=VERTEX_POINT('',#15050);
#4021=VERTEX_POINT('',#15052);
#4022=VERTEX_POINT('',#15054);
#4023=VERTEX_POINT('',#15064);
#4024=VERTEX_POINT('',#15065);
#4025=VERTEX_POINT('',#15067);
#4026=VERTEX_POINT('',#15069);
#4027=VERTEX_POINT('',#15118);
#4028=VERTEX_POINT('',#15119);
#4029=VERTEX_POINT('',#15158);
#4030=VERTEX_POINT('',#15160);
#4031=VERTEX_POINT('',#15186);
#4032=VERTEX_POINT('',#15214);
#4033=VERTEX_POINT('',#15237);
#4034=VERTEX_POINT('',#15263);
#4035=VERTEX_POINT('',#15269);
#4036=VERTEX_POINT('',#15303);
#4037=VERTEX_POINT('',#15304);
#4038=VERTEX_POINT('',#15306);
#4039=VERTEX_POINT('',#15308);
#4040=VERTEX_POINT('',#15341);
#4041=VERTEX_POINT('',#15342);
#4042=VERTEX_POINT('',#15344);
#4043=VERTEX_POINT('',#15349);
#4044=VERTEX_POINT('',#15351);
#4045=VERTEX_POINT('',#15358);
#4046=VERTEX_POINT('',#15366);
#4047=VERTEX_POINT('',#15367);
#4048=VERTEX_POINT('',#15372);
#4049=VERTEX_POINT('',#15394);
#4050=VERTEX_POINT('',#15396);
#4051=VERTEX_POINT('',#15452);
#4052=VERTEX_POINT('',#15453);
#4053=VERTEX_POINT('',#15455);
#4054=VERTEX_POINT('',#15461);
#4055=VERTEX_POINT('',#15463);
#4056=VERTEX_POINT('',#15470);
#4057=VERTEX_POINT('',#15480);
#4058=VERTEX_POINT('',#15481);
#4059=VERTEX_POINT('',#15483);
#4060=VERTEX_POINT('',#15485);
#4061=VERTEX_POINT('',#15487);
#4062=VERTEX_POINT('',#15537);
#4063=VERTEX_POINT('',#15538);
#4064=VERTEX_POINT('',#15540);
#4065=VERTEX_POINT('',#15542);
#4066=VERTEX_POINT('',#15546);
#4067=VERTEX_POINT('',#15548);
#4068=VERTEX_POINT('',#15552);
#4069=VERTEX_POINT('',#15553);
#4070=VERTEX_POINT('',#15578);
#4071=VERTEX_POINT('',#15608);
#4072=VERTEX_POINT('',#15609);
#4073=VERTEX_POINT('',#15638);
#4074=VERTEX_POINT('',#15639);
#4075=VERTEX_POINT('',#15680);
#4076=VERTEX_POINT('',#15681);
#4077=VERTEX_POINT('',#15686);
#4078=VERTEX_POINT('',#15687);
#4079=VERTEX_POINT('',#15690);
#4080=VERTEX_POINT('',#15697);
#4081=VERTEX_POINT('',#15698);
#4082=VERTEX_POINT('',#15727);
#4083=VERTEX_POINT('',#15728);
#4084=VERTEX_POINT('',#15769);
#4085=VERTEX_POINT('',#15775);
#4086=VERTEX_POINT('',#15803);
#4087=VERTEX_POINT('',#15807);
#4088=VERTEX_POINT('',#15809);
#4089=VERTEX_POINT('',#15813);
#4090=VERTEX_POINT('',#15815);
#4091=VERTEX_POINT('',#15819);
#4092=VERTEX_POINT('',#15821);
#4093=VERTEX_POINT('',#15825);
#4094=VERTEX_POINT('',#15859);
#4095=VERTEX_POINT('',#15904);
#4096=VERTEX_POINT('',#15906);
#4097=VERTEX_POINT('',#15934);
#4098=VERTEX_POINT('',#15935);
#4099=VERTEX_POINT('',#16007);
#4100=VERTEX_POINT('',#16035);
#4101=VERTEX_POINT('',#16036);
#4102=VERTEX_POINT('',#16038);
#4103=VERTEX_POINT('',#16040);
#4104=VERTEX_POINT('',#16095);
#4105=VERTEX_POINT('',#16097);
#4106=VERTEX_POINT('',#16130);
#4107=VERTEX_POINT('',#16131);
#4108=VERTEX_POINT('',#16133);
#4109=VERTEX_POINT('',#16135);
#4110=VERTEX_POINT('',#16137);
#4111=VERTEX_POINT('',#16139);
#4112=VERTEX_POINT('',#16141);
#4113=VERTEX_POINT('',#16143);
#4114=VERTEX_POINT('',#16146);
#4115=VERTEX_POINT('',#16147);
#4116=VERTEX_POINT('',#16173);
#4117=VERTEX_POINT('',#16174);
#4118=VERTEX_POINT('',#16202);
#4119=VERTEX_POINT('',#16205);
#4120=VERTEX_POINT('',#16207);
#4121=VERTEX_POINT('',#16209);
#4122=VERTEX_POINT('',#16215);
#4123=VERTEX_POINT('',#16217);
#4124=VERTEX_POINT('',#16222);
#4125=VERTEX_POINT('',#16224);
#4126=VERTEX_POINT('',#16229);
#4127=VERTEX_POINT('',#16231);
#4128=VERTEX_POINT('',#16237);
#4129=VERTEX_POINT('',#16239);
#4130=VERTEX_POINT('',#16243);
#4131=VERTEX_POINT('',#16247);
#4132=VERTEX_POINT('',#16251);
#4133=VERTEX_POINT('',#16253);
#4134=VERTEX_POINT('',#16257);
#4135=VERTEX_POINT('',#16259);
#4136=VERTEX_POINT('',#16261);
#4137=VERTEX_POINT('',#16263);
#4138=VERTEX_POINT('',#16265);
#4139=VERTEX_POINT('',#16267);
#4140=VERTEX_POINT('',#16269);
#4141=VERTEX_POINT('',#16271);
#4142=VERTEX_POINT('',#16273);
#4143=VERTEX_POINT('',#16275);
#4144=VERTEX_POINT('',#16277);
#4145=VERTEX_POINT('',#16279);
#4146=VERTEX_POINT('',#16281);
#4147=VERTEX_POINT('',#16283);
#4148=VERTEX_POINT('',#16287);
#4149=VERTEX_POINT('',#16293);
#4150=VERTEX_POINT('',#16336);
#4151=VERTEX_POINT('',#16340);
#4152=VERTEX_POINT('',#16341);
#4153=VERTEX_POINT('',#16357);
#4154=VERTEX_POINT('',#16358);
#4155=VERTEX_POINT('',#16360);
#4156=VERTEX_POINT('',#16362);
#4157=VERTEX_POINT('',#16364);
#4158=VERTEX_POINT('',#16379);
#4159=VERTEX_POINT('',#16383);
#4160=VERTEX_POINT('',#16387);
#4161=VERTEX_POINT('',#16388);
#4162=VERTEX_POINT('',#16390);
#4163=VERTEX_POINT('',#16392);
#4164=VERTEX_POINT('',#16411);
#4165=VERTEX_POINT('',#16413);
#4166=VERTEX_POINT('',#16432);
#4167=VERTEX_POINT('',#16433);
#4168=VERTEX_POINT('',#16435);
#4169=VERTEX_POINT('',#16437);
#4170=VERTEX_POINT('',#16465);
#4171=VERTEX_POINT('',#16466);
#4172=VERTEX_POINT('',#16498);
#4173=VERTEX_POINT('',#16499);
#4174=VERTEX_POINT('',#16504);
#4175=VERTEX_POINT('',#16505);
#4176=VERTEX_POINT('',#16510);
#4177=VERTEX_POINT('',#16512);
#4178=VERTEX_POINT('',#16516);
#4179=VERTEX_POINT('',#16520);
#4180=VERTEX_POINT('',#16524);
#4181=VERTEX_POINT('',#16525);
#4182=VERTEX_POINT('',#16527);
#4183=VERTEX_POINT('',#16529);
#4184=VERTEX_POINT('',#16572);
#4185=VERTEX_POINT('',#16573);
#4186=VERTEX_POINT('',#16578);
#4187=VERTEX_POINT('',#16579);
#4188=VERTEX_POINT('',#16584);
#4189=VERTEX_POINT('',#16586);
#4190=VERTEX_POINT('',#16605);
#4191=VERTEX_POINT('',#16606);
#4192=VERTEX_POINT('',#16608);
#4193=VERTEX_POINT('',#16610);
#4194=VERTEX_POINT('',#16638);
#4195=VERTEX_POINT('',#16639);
#4196=VERTEX_POINT('',#16647);
#4197=VERTEX_POINT('',#16649);
#4198=VERTEX_POINT('',#16653);
#4199=VERTEX_POINT('',#16657);
#4200=VERTEX_POINT('',#16661);
#4201=VERTEX_POINT('',#16662);
#4202=VERTEX_POINT('',#16664);
#4203=VERTEX_POINT('',#16666);
#4204=VERTEX_POINT('',#16715);
#4205=VERTEX_POINT('',#16716);
#4206=VERTEX_POINT('',#16755);
#4207=VERTEX_POINT('',#16757);
#4208=VERTEX_POINT('',#16782);
#4209=VERTEX_POINT('',#16784);
#4210=VERTEX_POINT('',#16812);
#4211=VERTEX_POINT('',#16813);
#4212=VERTEX_POINT('',#16837);
#4213=VERTEX_POINT('',#16839);
#4214=VERTEX_POINT('',#16843);
#4215=VERTEX_POINT('',#16866);
#4216=VERTEX_POINT('',#16868);
#4217=VERTEX_POINT('',#16872);
#4218=VERTEX_POINT('',#16876);
#4219=VERTEX_POINT('',#16878);
#4220=VERTEX_POINT('',#16880);
#4221=VERTEX_POINT('',#16885);
#4222=VERTEX_POINT('',#16887);
#4223=VERTEX_POINT('',#16889);
#4224=VERTEX_POINT('',#16891);
#4225=VERTEX_POINT('',#16893);
#4226=VERTEX_POINT('',#16895);
#4227=VERTEX_POINT('',#16897);
#4228=VERTEX_POINT('',#16899);
#4229=VERTEX_POINT('',#16901);
#4230=VERTEX_POINT('',#16911);
#4231=VERTEX_POINT('',#16912);
#4232=VERTEX_POINT('',#16914);
#4233=VERTEX_POINT('',#16916);
#4234=VERTEX_POINT('',#16965);
#4235=VERTEX_POINT('',#16966);
#4236=VERTEX_POINT('',#17005);
#4237=VERTEX_POINT('',#17007);
#4238=VERTEX_POINT('',#17033);
#4239=VERTEX_POINT('',#17061);
#4240=VERTEX_POINT('',#17084);
#4241=VERTEX_POINT('',#17110);
#4242=VERTEX_POINT('',#17116);
#4243=VERTEX_POINT('',#17150);
#4244=VERTEX_POINT('',#17151);
#4245=VERTEX_POINT('',#17153);
#4246=VERTEX_POINT('',#17155);
#4247=VERTEX_POINT('',#17188);
#4248=VERTEX_POINT('',#17190);
#4249=VERTEX_POINT('',#17199);
#4250=VERTEX_POINT('',#17200);
#4251=VERTEX_POINT('',#17205);
#4252=VERTEX_POINT('',#17227);
#4253=VERTEX_POINT('',#17229);
#4254=VERTEX_POINT('',#17283);
#4255=VERTEX_POINT('',#17285);
#4256=VERTEX_POINT('',#17296);
#4257=VERTEX_POINT('',#17298);
#4258=VERTEX_POINT('',#17347);
#4259=VERTEX_POINT('',#17348);
#4260=VERTEX_POINT('',#17350);
#4261=VERTEX_POINT('',#17352);
#4262=VERTEX_POINT('',#17356);
#4263=VERTEX_POINT('',#17358);
#4264=VERTEX_POINT('',#17362);
#4265=VERTEX_POINT('',#17363);
#4266=VERTEX_POINT('',#17386);
#4267=VERTEX_POINT('',#17416);
#4268=VERTEX_POINT('',#17417);
#4269=VERTEX_POINT('',#17474);
#4270=VERTEX_POINT('',#17478);
#4271=VERTEX_POINT('',#17479);
#4272=VERTEX_POINT('',#17482);
#4273=VERTEX_POINT('',#17489);
#4274=VERTEX_POINT('',#17490);
#4275=VERTEX_POINT('',#17547);
#4276=VERTEX_POINT('',#17553);
#4277=VERTEX_POINT('',#17581);
#4278=VERTEX_POINT('',#17585);
#4279=VERTEX_POINT('',#17589);
#4280=VERTEX_POINT('',#17591);
#4281=VERTEX_POINT('',#17595);
#4282=VERTEX_POINT('',#17597);
#4283=VERTEX_POINT('',#17633);
#4284=VERTEX_POINT('',#17678);
#4285=VERTEX_POINT('',#17706);
#4286=VERTEX_POINT('',#17737);
#4287=VERTEX_POINT('',#17765);
#4288=VERTEX_POINT('',#17766);
#4289=VERTEX_POINT('',#17768);
#4290=VERTEX_POINT('',#17770);
#4291=VERTEX_POINT('',#17825);
#4292=VERTEX_POINT('',#17827);
#4293=VERTEX_POINT('',#17860);
#4294=VERTEX_POINT('',#17864);
#4295=VERTEX_POINT('',#17866);
#4296=VERTEX_POINT('',#17868);
#4297=VERTEX_POINT('',#17870);
#4298=VERTEX_POINT('',#17872);
#4299=VERTEX_POINT('',#17874);
#4300=VERTEX_POINT('',#17876);
#4301=VERTEX_POINT('',#17878);
#4302=VERTEX_POINT('',#17880);
#4303=VERTEX_POINT('',#17882);
#4304=VERTEX_POINT('',#17884);
#4305=VERTEX_POINT('',#17886);
#4306=VERTEX_POINT('',#17888);
#4307=VERTEX_POINT('',#17890);
#4308=VERTEX_POINT('',#17898);
#4309=VERTEX_POINT('',#17899);
#4310=VERTEX_POINT('',#17901);
#4311=VERTEX_POINT('',#17903);
#4312=VERTEX_POINT('',#17907);
#4313=VERTEX_POINT('',#17908);
#4314=VERTEX_POINT('',#17913);
#4315=VERTEX_POINT('',#17914);
#4316=VERTEX_POINT('',#17919);
#4317=VERTEX_POINT('',#17923);
#4318=VERTEX_POINT('',#17924);
#4319=VERTEX_POINT('',#17926);
#4320=VERTEX_POINT('',#17928);
#4321=VERTEX_POINT('',#17947);
#4322=VERTEX_POINT('',#17949);
#4323=VERTEX_POINT('',#17968);
#4324=VERTEX_POINT('',#17969);
#4325=VERTEX_POINT('',#17971);
#4326=VERTEX_POINT('',#17973);
#4327=VERTEX_POINT('',#18001);
#4328=VERTEX_POINT('',#18002);
#4329=VERTEX_POINT('',#18034);
#4330=VERTEX_POINT('',#18035);
#4331=VERTEX_POINT('',#18040);
#4332=VERTEX_POINT('',#18041);
#4333=VERTEX_POINT('',#18046);
#4334=VERTEX_POINT('',#18048);
#4335=VERTEX_POINT('',#18052);
#4336=VERTEX_POINT('',#18056);
#4337=VERTEX_POINT('',#18060);
#4338=VERTEX_POINT('',#18061);
#4339=VERTEX_POINT('',#18063);
#4340=VERTEX_POINT('',#18065);
#4341=VERTEX_POINT('',#18108);
#4342=VERTEX_POINT('',#18109);
#4343=VERTEX_POINT('',#18114);
#4344=VERTEX_POINT('',#18115);
#4345=VERTEX_POINT('',#18120);
#4346=VERTEX_POINT('',#18122);
#4347=VERTEX_POINT('',#18141);
#4348=VERTEX_POINT('',#18142);
#4349=VERTEX_POINT('',#18144);
#4350=VERTEX_POINT('',#18146);
#4351=VERTEX_POINT('',#18174);
#4352=VERTEX_POINT('',#18175);
#4353=VERTEX_POINT('',#18183);
#4354=VERTEX_POINT('',#18185);
#4355=VERTEX_POINT('',#18189);
#4356=VERTEX_POINT('',#18193);
#4357=VERTEX_POINT('',#18197);
#4358=VERTEX_POINT('',#18198);
#4359=VERTEX_POINT('',#18200);
#4360=VERTEX_POINT('',#18202);
#4361=VERTEX_POINT('',#18251);
#4362=VERTEX_POINT('',#18252);
#4363=VERTEX_POINT('',#18291);
#4364=VERTEX_POINT('',#18293);
#4365=VERTEX_POINT('',#18318);
#4366=VERTEX_POINT('',#18320);
#4367=VERTEX_POINT('',#18348);
#4368=VERTEX_POINT('',#18349);
#4369=VERTEX_POINT('',#18373);
#4370=VERTEX_POINT('',#18375);
#4371=VERTEX_POINT('',#18379);
#4372=VERTEX_POINT('',#18402);
#4373=VERTEX_POINT('',#18404);
#4374=VERTEX_POINT('',#18408);
#4375=VERTEX_POINT('',#18412);
#4376=VERTEX_POINT('',#18414);
#4377=VERTEX_POINT('',#18416);
#4378=VERTEX_POINT('',#18421);
#4379=VERTEX_POINT('',#18423);
#4380=VERTEX_POINT('',#18425);
#4381=VERTEX_POINT('',#18427);
#4382=VERTEX_POINT('',#18429);
#4383=VERTEX_POINT('',#18431);
#4384=VERTEX_POINT('',#18433);
#4385=VERTEX_POINT('',#18435);
#4386=VERTEX_POINT('',#18437);
#4387=VERTEX_POINT('',#18447);
#4388=VERTEX_POINT('',#18448);
#4389=VERTEX_POINT('',#18450);
#4390=VERTEX_POINT('',#18452);
#4391=VERTEX_POINT('',#18501);
#4392=VERTEX_POINT('',#18502);
#4393=VERTEX_POINT('',#18541);
#4394=VERTEX_POINT('',#18543);
#4395=VERTEX_POINT('',#18569);
#4396=VERTEX_POINT('',#18597);
#4397=VERTEX_POINT('',#18620);
#4398=VERTEX_POINT('',#18646);
#4399=VERTEX_POINT('',#18652);
#4400=VERTEX_POINT('',#18686);
#4401=VERTEX_POINT('',#18687);
#4402=VERTEX_POINT('',#18689);
#4403=VERTEX_POINT('',#18691);
#4404=VERTEX_POINT('',#18724);
#4405=VERTEX_POINT('',#18725);
#4406=VERTEX_POINT('',#18727);
#4407=VERTEX_POINT('',#18732);
#4408=VERTEX_POINT('',#18734);
#4409=VERTEX_POINT('',#18741);
#4410=VERTEX_POINT('',#18749);
#4411=VERTEX_POINT('',#18750);
#4412=VERTEX_POINT('',#18755);
#4413=VERTEX_POINT('',#18777);
#4414=VERTEX_POINT('',#18779);
#4415=VERTEX_POINT('',#18831);
#4416=VERTEX_POINT('',#18832);
#4417=VERTEX_POINT('',#18834);
#4418=VERTEX_POINT('',#18840);
#4419=VERTEX_POINT('',#18842);
#4420=VERTEX_POINT('',#18849);
#4421=VERTEX_POINT('',#18859);
#4422=VERTEX_POINT('',#18860);
#4423=VERTEX_POINT('',#18862);
#4424=VERTEX_POINT('',#18864);
#4425=VERTEX_POINT('',#18866);
#4426=VERTEX_POINT('',#18916);
#4427=VERTEX_POINT('',#18917);
#4428=VERTEX_POINT('',#18919);
#4429=VERTEX_POINT('',#18921);
#4430=VERTEX_POINT('',#18925);
#4431=VERTEX_POINT('',#18927);
#4432=VERTEX_POINT('',#18931);
#4433=VERTEX_POINT('',#18932);
#4434=VERTEX_POINT('',#18955);
#4435=VERTEX_POINT('',#18987);
#4436=VERTEX_POINT('',#18988);
#4437=VERTEX_POINT('',#19017);
#4438=VERTEX_POINT('',#19018);
#4439=VERTEX_POINT('',#19059);
#4440=VERTEX_POINT('',#19060);
#4441=VERTEX_POINT('',#19066);
#4442=VERTEX_POINT('',#19073);
#4443=VERTEX_POINT('',#19074);
#4444=VERTEX_POINT('',#19103);
#4445=VERTEX_POINT('',#19104);
#4446=VERTEX_POINT('',#19145);
#4447=VERTEX_POINT('',#19151);
#4448=VERTEX_POINT('',#19179);
#4449=VERTEX_POINT('',#19183);
#4450=VERTEX_POINT('',#19185);
#4451=VERTEX_POINT('',#19189);
#4452=VERTEX_POINT('',#19193);
#4453=VERTEX_POINT('',#19195);
#4454=VERTEX_POINT('',#19199);
#4455=VERTEX_POINT('',#19233);
#4456=VERTEX_POINT('',#19278);
#4457=VERTEX_POINT('',#19280);
#4458=VERTEX_POINT('',#19308);
#4459=VERTEX_POINT('',#19309);
#4460=VERTEX_POINT('',#19381);
#4461=VERTEX_POINT('',#19409);
#4462=VERTEX_POINT('',#19410);
#4463=VERTEX_POINT('',#19412);
#4464=VERTEX_POINT('',#19414);
#4465=VERTEX_POINT('',#19469);
#4466=VERTEX_POINT('',#19471);
#4467=VERTEX_POINT('',#19504);
#4468=VERTEX_POINT('',#19506);
#4469=VERTEX_POINT('',#19508);
#4470=VERTEX_POINT('',#19510);
#4471=VERTEX_POINT('',#19516);
#4472=VERTEX_POINT('',#19518);
#4473=VERTEX_POINT('',#19523);
#4474=VERTEX_POINT('',#19525);
#4475=VERTEX_POINT('',#19530);
#4476=VERTEX_POINT('',#19532);
#4477=VERTEX_POINT('',#19538);
#4478=VERTEX_POINT('',#19541);
#4479=VERTEX_POINT('',#19547);
#4480=VERTEX_POINT('',#19551);
#4481=VERTEX_POINT('',#19553);
#4482=VERTEX_POINT('',#19559);
#4483=VERTEX_POINT('',#19563);
#4484=VERTEX_POINT('',#19567);
#4485=VERTEX_POINT('',#19610);
#4486=VERTEX_POINT('',#19614);
#4487=VERTEX_POINT('',#19615);
#4488=VERTEX_POINT('',#19628);
#4489=VERTEX_POINT('',#19630);
#4490=VERTEX_POINT('',#19632);
#4491=VERTEX_POINT('',#19636);
#4492=VERTEX_POINT('',#19638);
#4493=VERTEX_POINT('',#19653);
#4494=VERTEX_POINT('',#19657);
#4495=VERTEX_POINT('',#19658);
#4496=VERTEX_POINT('',#19660);
#4497=VERTEX_POINT('',#19662);
#4498=VERTEX_POINT('',#19681);
#4499=VERTEX_POINT('',#19683);
#4500=VERTEX_POINT('',#19702);
#4501=VERTEX_POINT('',#19703);
#4502=VERTEX_POINT('',#19705);
#4503=VERTEX_POINT('',#19707);
#4504=VERTEX_POINT('',#19735);
#4505=VERTEX_POINT('',#19736);
#4506=VERTEX_POINT('',#19768);
#4507=VERTEX_POINT('',#19769);
#4508=VERTEX_POINT('',#19774);
#4509=VERTEX_POINT('',#19775);
#4510=VERTEX_POINT('',#19780);
#4511=VERTEX_POINT('',#19782);
#4512=VERTEX_POINT('',#19786);
#4513=VERTEX_POINT('',#19790);
#4514=VERTEX_POINT('',#19794);
#4515=VERTEX_POINT('',#19795);
#4516=VERTEX_POINT('',#19797);
#4517=VERTEX_POINT('',#19799);
#4518=VERTEX_POINT('',#19842);
#4519=VERTEX_POINT('',#19843);
#4520=VERTEX_POINT('',#19848);
#4521=VERTEX_POINT('',#19849);
#4522=VERTEX_POINT('',#19854);
#4523=VERTEX_POINT('',#19856);
#4524=VERTEX_POINT('',#19875);
#4525=VERTEX_POINT('',#19876);
#4526=VERTEX_POINT('',#19878);
#4527=VERTEX_POINT('',#19880);
#4528=VERTEX_POINT('',#19908);
#4529=VERTEX_POINT('',#19909);
#4530=VERTEX_POINT('',#19917);
#4531=VERTEX_POINT('',#19919);
#4532=VERTEX_POINT('',#19923);
#4533=VERTEX_POINT('',#19927);
#4534=VERTEX_POINT('',#19931);
#4535=VERTEX_POINT('',#19932);
#4536=VERTEX_POINT('',#19934);
#4537=VERTEX_POINT('',#19936);
#4538=VERTEX_POINT('',#19985);
#4539=VERTEX_POINT('',#19986);
#4540=VERTEX_POINT('',#20025);
#4541=VERTEX_POINT('',#20027);
#4542=VERTEX_POINT('',#20052);
#4543=VERTEX_POINT('',#20054);
#4544=VERTEX_POINT('',#20082);
#4545=VERTEX_POINT('',#20083);
#4546=VERTEX_POINT('',#20107);
#4547=VERTEX_POINT('',#20109);
#4548=VERTEX_POINT('',#20113);
#4549=VERTEX_POINT('',#20136);
#4550=VERTEX_POINT('',#20138);
#4551=VERTEX_POINT('',#20142);
#4552=VERTEX_POINT('',#20146);
#4553=VERTEX_POINT('',#20148);
#4554=VERTEX_POINT('',#20150);
#4555=VERTEX_POINT('',#20155);
#4556=VERTEX_POINT('',#20157);
#4557=VERTEX_POINT('',#20159);
#4558=VERTEX_POINT('',#20161);
#4559=VERTEX_POINT('',#20163);
#4560=VERTEX_POINT('',#20165);
#4561=VERTEX_POINT('',#20167);
#4562=VERTEX_POINT('',#20169);
#4563=VERTEX_POINT('',#20171);
#4564=VERTEX_POINT('',#20181);
#4565=VERTEX_POINT('',#20182);
#4566=VERTEX_POINT('',#20184);
#4567=VERTEX_POINT('',#20186);
#4568=VERTEX_POINT('',#20235);
#4569=VERTEX_POINT('',#20236);
#4570=VERTEX_POINT('',#20275);
#4571=VERTEX_POINT('',#20277);
#4572=VERTEX_POINT('',#20303);
#4573=VERTEX_POINT('',#20331);
#4574=VERTEX_POINT('',#20354);
#4575=VERTEX_POINT('',#20380);
#4576=VERTEX_POINT('',#20386);
#4577=VERTEX_POINT('',#20420);
#4578=VERTEX_POINT('',#20421);
#4579=VERTEX_POINT('',#20423);
#4580=VERTEX_POINT('',#20425);
#4581=VERTEX_POINT('',#20458);
#4582=VERTEX_POINT('',#20460);
#4583=VERTEX_POINT('',#20469);
#4584=VERTEX_POINT('',#20470);
#4585=VERTEX_POINT('',#20475);
#4586=VERTEX_POINT('',#20497);
#4587=VERTEX_POINT('',#20499);
#4588=VERTEX_POINT('',#20553);
#4589=VERTEX_POINT('',#20555);
#4590=VERTEX_POINT('',#20566);
#4591=VERTEX_POINT('',#20568);
#4592=VERTEX_POINT('',#20618);
#4593=VERTEX_POINT('',#20619);
#4594=VERTEX_POINT('',#20621);
#4595=VERTEX_POINT('',#20623);
#4596=VERTEX_POINT('',#20627);
#4597=VERTEX_POINT('',#20629);
#4598=VERTEX_POINT('',#20633);
#4599=VERTEX_POINT('',#20634);
#4600=VERTEX_POINT('',#20657);
#4601=VERTEX_POINT('',#20687);
#4602=VERTEX_POINT('',#20688);
#4603=VERTEX_POINT('',#20745);
#4604=VERTEX_POINT('',#20749);
#4605=VERTEX_POINT('',#20756);
#4606=VERTEX_POINT('',#20757);
#4607=VERTEX_POINT('',#20814);
#4608=VERTEX_POINT('',#20820);
#4609=VERTEX_POINT('',#20848);
#4610=VERTEX_POINT('',#20852);
#4611=VERTEX_POINT('',#20856);
#4612=VERTEX_POINT('',#20860);
#4613=VERTEX_POINT('',#20862);
#4614=VERTEX_POINT('',#20901);
#4615=VERTEX_POINT('',#20929);
#4616=VERTEX_POINT('',#20930);
#4617=VERTEX_POINT('',#21002);
#4618=VERTEX_POINT('',#21030);
#4619=VERTEX_POINT('',#21031);
#4620=VERTEX_POINT('',#21033);
#4621=VERTEX_POINT('',#21035);
#4622=VERTEX_POINT('',#21090);
#4623=VERTEX_POINT('',#21092);
#4624=VERTEX_POINT('',#21131);
#4625=VERTEX_POINT('',#21132);
#4626=VERTEX_POINT('',#21134);
#4627=VERTEX_POINT('',#21136);
#4628=VERTEX_POINT('',#21140);
#4629=VERTEX_POINT('',#21141);
#4630=VERTEX_POINT('',#21146);
#4631=VERTEX_POINT('',#21147);
#4632=VERTEX_POINT('',#21152);
#4633=VERTEX_POINT('',#21154);
#4634=VERTEX_POINT('',#21156);
#4635=VERTEX_POINT('',#21278);
#4636=VERTEX_POINT('',#21279);
#4637=VERTEX_POINT('',#21485);
#4638=VERTEX_POINT('',#21835);
#4639=VERTEX_POINT('',#21836);
#4640=VERTEX_POINT('',#21962);
#4641=VERTEX_POINT('',#22012);
#4642=VERTEX_POINT('',#22433);
#4643=VERTEX_POINT('',#22529);
#4644=VERTEX_POINT('',#22530);
#4645=VERTEX_POINT('',#22532);
#4646=VERTEX_POINT('',#22534);
#4647=VERTEX_POINT('',#22538);
#4648=VERTEX_POINT('',#22542);
#4649=VERTEX_POINT('',#22543);
#4650=VERTEX_POINT('',#22545);
#4651=VERTEX_POINT('',#22547);
#4652=VERTEX_POINT('',#22551);
#4653=VERTEX_POINT('',#22553);
#4654=VERTEX_POINT('',#22831);
#4655=VERTEX_POINT('',#22832);
#4656=VERTEX_POINT('',#22882);
#4657=VERTEX_POINT('',#22971);
#4658=VERTEX_POINT('',#23060);
#4659=VERTEX_POINT('',#23116);
#4660=VERTEX_POINT('',#23157);
#4661=VERTEX_POINT('',#23158);
#4662=VERTEX_POINT('',#23160);
#4663=VERTEX_POINT('',#23162);
#4664=VERTEX_POINT('',#23166);
#4665=VERTEX_POINT('',#23167);
#4666=VERTEX_POINT('',#23172);
#4667=VERTEX_POINT('',#23173);
#4668=VERTEX_POINT('',#23178);
#4669=VERTEX_POINT('',#23180);
#4670=VERTEX_POINT('',#23183);
#4671=VERTEX_POINT('',#23187);
#4672=VERTEX_POINT('',#23191);
#4673=VERTEX_POINT('',#23193);
#4674=VERTEX_POINT('',#23511);
#4675=VERTEX_POINT('',#23853);
#4676=VERTEX_POINT('',#23952);
#4677=VERTEX_POINT('',#23954);
#4678=VERTEX_POINT('',#23956);
#4679=VERTEX_POINT('',#23960);
#4680=VERTEX_POINT('',#23964);
#4681=VERTEX_POINT('',#23965);
#4682=VERTEX_POINT('',#23967);
#4683=VERTEX_POINT('',#23969);
#4684=VERTEX_POINT('',#23972);
#4685=VERTEX_POINT('',#23974);
#4686=VERTEX_POINT('',#23977);
#4687=VERTEX_POINT('',#23982);
#4688=VERTEX_POINT('',#23988);
#4689=VERTEX_POINT('',#23992);
#4690=VERTEX_POINT('',#23993);
#4691=VERTEX_POINT('',#23998);
#4692=VERTEX_POINT('',#23999);
#4693=VERTEX_POINT('',#24005);
#4694=VERTEX_POINT('',#24009);
#4695=VERTEX_POINT('',#24023);
#4696=VERTEX_POINT('',#24027);
#4697=VERTEX_POINT('',#24029);
#4698=VERTEX_POINT('',#24031);
#4699=VERTEX_POINT('',#24033);
#4700=VERTEX_POINT('',#24035);
#4701=VERTEX_POINT('',#24037);
#4702=VERTEX_POINT('',#24040);
#4703=VERTEX_POINT('',#24042);
#4704=VERTEX_POINT('',#24045);
#4705=VERTEX_POINT('',#24047);
#4706=VERTEX_POINT('',#24090);
#4707=VERTEX_POINT('',#24092);
#4708=VERTEX_POINT('',#24123);
#4709=VERTEX_POINT('',#24127);
#4710=VERTEX_POINT('',#24130);
#4711=VERTEX_POINT('',#24203);
#4712=VERTEX_POINT('',#24207);
#4713=VERTEX_POINT('',#24211);
#4714=VERTEX_POINT('',#24215);
#4715=VERTEX_POINT('',#24224);
#4716=VERTEX_POINT('',#24236);
#4717=VERTEX_POINT('',#24237);
#4718=VERTEX_POINT('',#24242);
#4719=VERTEX_POINT('',#24243);
#4720=VERTEX_POINT('',#24248);
#4721=VERTEX_POINT('',#24249);
#4722=VERTEX_POINT('',#24254);
#4723=VERTEX_POINT('',#24255);
#4724=VERTEX_POINT('',#24302);
#4725=VERTEX_POINT('',#24303);
#4726=VERTEX_POINT('',#24357);
#4727=VERTEX_POINT('',#24360);
#4728=VERTEX_POINT('',#24364);
#4729=VERTEX_POINT('',#24369);
#4730=VERTEX_POINT('',#24371);
#4731=VERTEX_POINT('',#24377);
#4732=VERTEX_POINT('',#24381);
#4733=VERTEX_POINT('',#24385);
#4734=VERTEX_POINT('',#24391);
#4735=VERTEX_POINT('',#24395);
#4736=VERTEX_POINT('',#24399);
#4737=VERTEX_POINT('',#24403);
#4738=VERTEX_POINT('',#24407);
#4739=VERTEX_POINT('',#24409);
#4740=VERTEX_POINT('',#24415);
#4741=VERTEX_POINT('',#24419);
#4742=VERTEX_POINT('',#24423);
#4743=VERTEX_POINT('',#24429);
#4744=VERTEX_POINT('',#24433);
#4745=VERTEX_POINT('',#24437);
#4746=VERTEX_POINT('',#24441);
#4747=VERTEX_POINT('',#24465);
#4748=VERTEX_POINT('',#24469);
#4749=VERTEX_POINT('',#24474);
#4750=VERTEX_POINT('',#24478);
#4751=VERTEX_POINT('',#24484);
#4752=VERTEX_POINT('',#24488);
#4753=VERTEX_POINT('',#24492);
#4754=VERTEX_POINT('',#24496);
#4755=VERTEX_POINT('',#24507);
#4756=VERTEX_POINT('',#24511);
#4757=VERTEX_POINT('',#24515);
#4758=EDGE_CURVE('',#3896,#3897,#3496,.T.);
#4759=EDGE_CURVE('',#3897,#3898,#3192,.T.);
#4760=EDGE_CURVE('',#3898,#3899,#3497,.T.);
#4761=EDGE_CURVE('',#3899,#3896,#3193,.T.);
#4762=EDGE_CURVE('',#3900,#3901,#3498,.T.);
#4763=EDGE_CURVE('',#3901,#3899,#371,.T.);
#4764=EDGE_CURVE('',#3898,#3900,#372,.T.);
#4765=EDGE_CURVE('',#3902,#3903,#3499,.T.);
#4766=EDGE_CURVE('',#3903,#3901,#3194,.T.);
#4767=EDGE_CURVE('',#3900,#3902,#3195,.T.);
#4768=EDGE_CURVE('',#3902,#3904,#373,.T.);
#4769=EDGE_CURVE('',#3904,#3905,#3500,.T.);
#4770=EDGE_CURVE('',#3905,#3903,#374,.T.);
#4771=EDGE_CURVE('',#3900,#3906,#375,.T.);
#4772=EDGE_CURVE('',#3906,#3907,#3196,.F.);
#4773=EDGE_CURVE('',#3902,#3907,#376,.T.);
#4774=EDGE_CURVE('',#3908,#3898,#377,.T.);
#4775=EDGE_CURVE('',#3906,#3908,#378,.T.);
#4776=EDGE_CURVE('',#3897,#3909,#379,.T.);
#4777=EDGE_CURVE('',#3909,#3908,#3197,.F.);
#4778=EDGE_CURVE('',#3910,#3911,#3501,.T.);
#4779=EDGE_CURVE('',#3911,#3912,#3198,.T.);
#4780=EDGE_CURVE('',#3912,#3913,#3502,.T.);
#4781=EDGE_CURVE('',#3913,#3910,#3199,.T.);
#4782=EDGE_CURVE('',#3914,#3915,#3503,.T.);
#4783=EDGE_CURVE('',#3915,#3913,#380,.T.);
#4784=EDGE_CURVE('',#3912,#3914,#381,.T.);
#4785=EDGE_CURVE('',#3916,#3917,#3504,.T.);
#4786=EDGE_CURVE('',#3917,#3915,#3200,.T.);
#4787=EDGE_CURVE('',#3914,#3916,#3201,.T.);
#4788=EDGE_CURVE('',#3916,#3918,#382,.T.);
#4789=EDGE_CURVE('',#3918,#3919,#3505,.T.);
#4790=EDGE_CURVE('',#3919,#3917,#383,.T.);
#4791=EDGE_CURVE('',#3914,#3920,#384,.T.);
#4792=EDGE_CURVE('',#3920,#3921,#3202,.F.);
#4793=EDGE_CURVE('',#3921,#3916,#385,.T.);
#4794=EDGE_CURVE('',#3922,#3912,#386,.T.);
#4795=EDGE_CURVE('',#3920,#3922,#387,.T.);
#4796=EDGE_CURVE('',#3911,#3923,#388,.T.);
#4797=EDGE_CURVE('',#3923,#3922,#3203,.F.);
#4798=EDGE_CURVE('',#3924,#3925,#3506,.T.);
#4799=EDGE_CURVE('',#3925,#3926,#3204,.T.);
#4800=EDGE_CURVE('',#3926,#3927,#3507,.T.);
#4801=EDGE_CURVE('',#3927,#3924,#3205,.T.);
#4802=EDGE_CURVE('',#3928,#3929,#3508,.T.);
#4803=EDGE_CURVE('',#3929,#3927,#389,.T.);
#4804=EDGE_CURVE('',#3926,#3928,#390,.T.);
#4805=EDGE_CURVE('',#3930,#3931,#3509,.T.);
#4806=EDGE_CURVE('',#3931,#3929,#3206,.T.);
#4807=EDGE_CURVE('',#3928,#3930,#3207,.T.);
#4808=EDGE_CURVE('',#3930,#3932,#391,.T.);
#4809=EDGE_CURVE('',#3932,#3933,#3510,.T.);
#4810=EDGE_CURVE('',#3933,#3931,#392,.T.);
#4811=EDGE_CURVE('',#3928,#3934,#393,.T.);
#4812=EDGE_CURVE('',#3934,#3935,#3208,.F.);
#4813=EDGE_CURVE('',#3935,#3930,#394,.T.);
#4814=EDGE_CURVE('',#3936,#3926,#395,.T.);
#4815=EDGE_CURVE('',#3934,#3936,#396,.T.);
#4816=EDGE_CURVE('',#3925,#3937,#397,.T.);
#4817=EDGE_CURVE('',#3937,#3936,#3209,.F.);
#4818=EDGE_CURVE('',#3938,#3939,#3511,.T.);
#4819=EDGE_CURVE('',#3939,#3940,#3210,.T.);
#4820=EDGE_CURVE('',#3940,#3941,#3512,.T.);
#4821=EDGE_CURVE('',#3941,#3938,#3211,.T.);
#4822=EDGE_CURVE('',#3942,#3943,#3513,.T.);
#4823=EDGE_CURVE('',#3943,#3941,#398,.T.);
#4824=EDGE_CURVE('',#3940,#3942,#399,.T.);
#4825=EDGE_CURVE('',#3944,#3945,#3514,.T.);
#4826=EDGE_CURVE('',#3945,#3943,#3212,.T.);
#4827=EDGE_CURVE('',#3942,#3944,#3213,.T.);
#4828=EDGE_CURVE('',#3944,#3946,#400,.T.);
#4829=EDGE_CURVE('',#3946,#3947,#3515,.T.);
#4830=EDGE_CURVE('',#3947,#3945,#401,.T.);
#4831=EDGE_CURVE('',#3942,#3948,#402,.T.);
#4832=EDGE_CURVE('',#3948,#3949,#3214,.F.);
#4833=EDGE_CURVE('',#3944,#3949,#403,.T.);
#4834=EDGE_CURVE('',#3950,#3940,#404,.T.);
#4835=EDGE_CURVE('',#3948,#3950,#405,.T.);
#4836=EDGE_CURVE('',#3939,#3951,#406,.T.);
#4837=EDGE_CURVE('',#3951,#3950,#3215,.F.);
#4838=EDGE_CURVE('',#3952,#3935,#407,.T.);
#4839=EDGE_CURVE('',#3932,#3952,#408,.T.);
#4840=EDGE_CURVE('',#3953,#3954,#409,.T.);
#4841=EDGE_CURVE('',#3954,#3955,#3516,.T.);
#4842=EDGE_CURVE('',#3955,#3956,#410,.T.);
#4843=EDGE_CURVE('',#3956,#3953,#94,.T.);
#4844=EDGE_CURVE('',#3956,#3957,#3517,.T.);
#4845=EDGE_CURVE('',#3957,#3958,#95,.T.);
#4846=EDGE_CURVE('',#3958,#3953,#3518,.T.);
#4847=EDGE_CURVE('',#3959,#3960,#3519,.T.);
#4848=EDGE_CURVE('',#3960,#3961,#411,.T.);
#4849=EDGE_CURVE('',#3961,#3962,#3216,.F.);
#4850=EDGE_CURVE('',#3962,#3959,#412,.T.);
#4851=EDGE_CURVE('',#3963,#3964,#3520,.T.);
#4852=EDGE_CURVE('',#3964,#3960,#3217,.T.);
#4853=EDGE_CURVE('',#3959,#3963,#3218,.T.);
#4854=EDGE_CURVE('',#3957,#3964,#413,.T.);
#4855=EDGE_CURVE('',#3963,#3958,#414,.T.);
#4856=EDGE_CURVE('',#3965,#3966,#3521,.T.);
#4857=EDGE_CURVE('',#3966,#3955,#3219,.T.);
#4858=EDGE_CURVE('',#3954,#3965,#3220,.T.);
#4859=EDGE_CURVE('',#3967,#3968,#3221,.F.);
#4860=EDGE_CURVE('',#3968,#3966,#415,.T.);
#4861=EDGE_CURVE('',#3965,#3967,#416,.T.);
#4862=EDGE_CURVE('',#3969,#3953,#417,.T.);
#4863=EDGE_CURVE('',#3969,#3970,#418,.T.);
#4864=EDGE_CURVE('',#3970,#3967,#419,.F.);
#4865=EDGE_CURVE('',#3958,#3971,#420,.T.);
#4866=EDGE_CURVE('',#3971,#3969,#3222,.T.);
#4867=EDGE_CURVE('',#3962,#3972,#421,.F.);
#4868=EDGE_CURVE('',#3971,#3972,#422,.T.);
#4869=EDGE_CURVE('',#3973,#3974,#423,.T.);
#4870=EDGE_CURVE('',#3974,#3975,#3522,.T.);
#4871=EDGE_CURVE('',#3975,#3976,#424,.T.);
#4872=EDGE_CURVE('',#3976,#3973,#96,.T.);
#4873=EDGE_CURVE('',#3977,#3978,#3523,.T.);
#4874=EDGE_CURVE('',#3978,#3975,#3223,.T.);
#4875=EDGE_CURVE('',#3974,#3977,#3224,.T.);
#4876=EDGE_CURVE('',#3979,#3980,#3225,.F.);
#4877=EDGE_CURVE('',#3980,#3978,#425,.T.);
#4878=EDGE_CURVE('',#3977,#3979,#426,.T.);
#4879=EDGE_CURVE('',#3981,#3973,#3524,.T.);
#4880=EDGE_CURVE('',#3976,#3982,#3525,.T.);
#4881=EDGE_CURVE('',#3982,#3981,#97,.T.);
#4882=EDGE_CURVE('',#3983,#3984,#3526,.T.);
#4883=EDGE_CURVE('',#3984,#3985,#427,.T.);
#4884=EDGE_CURVE('',#3985,#3986,#3226,.F.);
#4885=EDGE_CURVE('',#3986,#3983,#428,.T.);
#4886=EDGE_CURVE('',#3987,#3988,#3527,.T.);
#4887=EDGE_CURVE('',#3988,#3984,#3227,.T.);
#4888=EDGE_CURVE('',#3983,#3987,#3228,.T.);
#4889=EDGE_CURVE('',#3982,#3988,#429,.T.);
#4890=EDGE_CURVE('',#3987,#3981,#430,.T.);
#4891=EDGE_CURVE('',#3989,#3973,#431,.T.);
#4892=EDGE_CURVE('',#3989,#3990,#432,.T.);
#4893=EDGE_CURVE('',#3990,#3979,#433,.F.);
#4894=EDGE_CURVE('',#3981,#3991,#434,.T.);
#4895=EDGE_CURVE('',#3991,#3989,#3229,.T.);
#4896=EDGE_CURVE('',#3986,#3992,#435,.F.);
#4897=EDGE_CURVE('',#3991,#3992,#436,.T.);
#4898=EDGE_CURVE('',#3993,#3994,#437,.T.);
#4899=EDGE_CURVE('',#3994,#3995,#3528,.T.);
#4900=EDGE_CURVE('',#3995,#3996,#438,.T.);
#4901=EDGE_CURVE('',#3996,#3993,#98,.T.);
#4902=EDGE_CURVE('',#3997,#3998,#3529,.T.);
#4903=EDGE_CURVE('',#3998,#3995,#3230,.T.);
#4904=EDGE_CURVE('',#3994,#3997,#3231,.T.);
#4905=EDGE_CURVE('',#3999,#3993,#3232,.T.);
#4906=EDGE_CURVE('',#3996,#4000,#3233,.T.);
#4907=EDGE_CURVE('',#4000,#3999,#99,.T.);
#4908=EDGE_CURVE('',#4000,#4001,#439,.T.);
#4909=EDGE_CURVE('',#4001,#4002,#3530,.T.);
#4910=EDGE_CURVE('',#4002,#3999,#440,.T.);
#4911=EDGE_CURVE('',#4003,#4004,#3531,.T.);
#4912=EDGE_CURVE('',#4004,#4002,#3234,.T.);
#4913=EDGE_CURVE('',#4001,#4003,#3235,.T.);
#4914=EDGE_CURVE('',#3997,#4005,#3236,.F.);
#4915=EDGE_CURVE('',#4005,#4006,#3532,.T.);
#4916=EDGE_CURVE('',#4006,#3998,#3237,.T.);
#4917=EDGE_CURVE('',#4005,#4007,#3238,.F.);
#4918=EDGE_CURVE('',#4007,#4006,#441,.T.);
#4919=EDGE_CURVE('',#4008,#4004,#3239,.F.);
#4920=EDGE_CURVE('',#4003,#4009,#3240,.T.);
#4921=EDGE_CURVE('',#4009,#4008,#3533,.T.);
#4922=EDGE_CURVE('',#4010,#4008,#3241,.F.);
#4923=EDGE_CURVE('',#4009,#4010,#442,.T.);
#4924=EDGE_CURVE('',#4006,#4011,#443,.T.);
#4925=EDGE_CURVE('',#4012,#4011,#3242,.T.);
#4926=EDGE_CURVE('',#4013,#4012,#3243,.T.);
#4927=EDGE_CURVE('',#4013,#3995,#444,.T.);
#4928=EDGE_CURVE('',#4010,#4007,#445,.T.);
#4929=EDGE_CURVE('',#4014,#4009,#446,.T.);
#4930=EDGE_CURVE('',#4015,#4014,#3244,.T.);
#4931=EDGE_CURVE('',#4016,#4015,#447,.T.);
#4932=EDGE_CURVE('',#4017,#4016,#448,.T.);
#4933=EDGE_CURVE('',#4018,#4017,#449,.T.);
#4934=EDGE_CURVE('',#4019,#4018,#3245,.T.);
#4935=EDGE_CURVE('',#4020,#4019,#450,.T.);
#4936=EDGE_CURVE('',#4021,#4020,#451,.T.);
#4937=EDGE_CURVE('',#4022,#4021,#452,.T.);
#4938=EDGE_CURVE('',#4011,#4022,#453,.T.);
#4939=EDGE_CURVE('',#3990,#3993,#454,.T.);
#4940=EDGE_CURVE('',#3989,#3997,#455,.F.);
#4941=EDGE_CURVE('',#3999,#3992,#456,.T.);
#4942=EDGE_CURVE('',#3992,#3990,#3246,.T.);
#4943=EDGE_CURVE('',#4023,#4024,#457,.T.);
#4944=EDGE_CURVE('',#4024,#4025,#3534,.T.);
#4945=EDGE_CURVE('',#4025,#4026,#458,.T.);
#4946=EDGE_CURVE('',#4026,#4023,#100,.T.);
#4947=EDGE_CURVE('',#4027,#4028,#3535,.T.);
#4948=EDGE_CURVE('',#4028,#4025,#3247,.T.);
#4949=EDGE_CURVE('',#4024,#4027,#3248,.T.);
#4950=EDGE_CURVE('',#4029,#4023,#3249,.T.);
#4951=EDGE_CURVE('',#4026,#4030,#3250,.T.);
#4952=EDGE_CURVE('',#4030,#4029,#101,.T.);
#4953=EDGE_CURVE('',#4030,#4013,#459,.T.);
#4954=EDGE_CURVE('',#4013,#4031,#3536,.T.);
#4955=EDGE_CURVE('',#4031,#4029,#460,.T.);
#4956=EDGE_CURVE('',#4012,#4032,#3537,.T.);
#4957=EDGE_CURVE('',#4032,#4031,#3251,.T.);
#4958=EDGE_CURVE('',#4027,#4033,#3252,.F.);
#4959=EDGE_CURVE('',#4033,#4020,#3538,.T.);
#4960=EDGE_CURVE('',#4020,#4028,#3253,.T.);
#4961=EDGE_CURVE('',#4033,#4021,#3254,.F.);
#4962=EDGE_CURVE('',#4034,#4032,#3255,.F.);
#4963=EDGE_CURVE('',#4011,#4034,#3539,.T.);
#4964=EDGE_CURVE('',#4022,#4034,#3256,.F.);
#4965=EDGE_CURVE('',#4019,#4035,#3540,.T.);
#4966=EDGE_CURVE('',#4035,#4025,#461,.T.);
#4967=EDGE_CURVE('',#3970,#4023,#462,.T.);
#4968=EDGE_CURVE('',#3969,#4027,#463,.F.);
#4969=EDGE_CURVE('',#4029,#3972,#464,.T.);
#4970=EDGE_CURVE('',#3972,#3970,#3257,.T.);
#4971=EDGE_CURVE('',#4036,#4037,#3541,.T.);
#4972=EDGE_CURVE('',#4038,#4036,#3258,.F.);
#4973=EDGE_CURVE('',#4039,#4038,#3542,.T.);
#4974=EDGE_CURVE('',#4039,#4037,#3259,.T.);
#4975=EDGE_CURVE('',#4040,#4041,#3260,.T.);
#4976=EDGE_CURVE('',#4042,#4040,#102,.T.);
#4977=EDGE_CURVE('',#4043,#4042,#3543,.T.);
#4978=EDGE_CURVE('',#4044,#4043,#103,.F.);
#4979=EDGE_CURVE('',#4045,#4044,#3544,.T.);
#4980=EDGE_CURVE('',#4041,#4045,#104,.T.);
#4981=EDGE_CURVE('',#4046,#4047,#3545,.F.);
#4982=EDGE_CURVE('',#4017,#4046,#3546,.F.);
#4983=EDGE_CURVE('',#4047,#4017,#3547,.F.);
#4984=EDGE_CURVE('',#4048,#4018,#105,.T.);
#4985=EDGE_CURVE('',#4046,#4044,#465,.T.);
#4986=EDGE_CURVE('',#4043,#4049,#466,.T.);
#4987=EDGE_CURVE('',#4049,#4050,#106,.T.);
#4988=EDGE_CURVE('',#4050,#4048,#467,.T.);
#4989=EDGE_CURVE('',#4051,#4052,#3261,.T.);
#4990=EDGE_CURVE('',#4053,#4051,#107,.T.);
#4991=EDGE_CURVE('',#4054,#4053,#3548,.T.);
#4992=EDGE_CURVE('',#4055,#4054,#108,.F.);
#4993=EDGE_CURVE('',#4056,#4055,#3549,.T.);
#4994=EDGE_CURVE('',#4052,#4056,#109,.T.);
#4995=EDGE_CURVE('',#4056,#4042,#468,.T.);
#4996=EDGE_CURVE('',#4055,#4043,#469,.T.);
#4997=EDGE_CURVE('',#4057,#4058,#3262,.T.);
#4998=EDGE_CURVE('',#4057,#4059,#470,.T.);
#4999=EDGE_CURVE('',#4059,#4060,#3550,.T.);
#5000=EDGE_CURVE('',#4060,#4061,#471,.T.);
#5001=EDGE_CURVE('',#4058,#4061,#3263,.T.);
#5002=EDGE_CURVE('',#4060,#4053,#3264,.T.);
#5003=EDGE_CURVE('',#4059,#4054,#3265,.T.);
#5004=EDGE_CURVE('',#4062,#4063,#3551,.T.);
#5005=EDGE_CURVE('',#4064,#4062,#3266,.F.);
#5006=EDGE_CURVE('',#4065,#4064,#3552,.T.);
#5007=EDGE_CURVE('',#4065,#4063,#3267,.T.);
#5008=EDGE_CURVE('',#4016,#4066,#3553,.F.);
#5009=EDGE_CURVE('',#4067,#4016,#3554,.F.);
#5010=EDGE_CURVE('',#4066,#4067,#3555,.F.);
#5011=EDGE_CURVE('',#4068,#4069,#110,.T.);
#5012=EDGE_CURVE('',#4069,#4055,#472,.T.);
#5013=EDGE_CURVE('',#4054,#4067,#473,.T.);
#5014=EDGE_CURVE('',#4015,#4070,#111,.T.);
#5015=EDGE_CURVE('',#4070,#4068,#474,.T.);
#5016=EDGE_CURVE('',#4062,#4066,#475,.T.);
#5017=EDGE_CURVE('',#4067,#4064,#476,.T.);
#5018=EDGE_CURVE('',#4066,#4047,#477,.T.);
#5019=EDGE_CURVE('',#4071,#4072,#3556,.T.);
#5020=EDGE_CURVE('',#4072,#4065,#478,.T.);
#5021=EDGE_CURVE('',#4064,#4071,#479,.T.);
#5022=EDGE_CURVE('',#4073,#4074,#112,.T.);
#5023=EDGE_CURVE('',#4073,#4072,#3268,.T.);
#5024=EDGE_CURVE('',#4071,#4074,#3269,.T.);
#5025=EDGE_CURVE('',#3988,#4062,#480,.T.);
#5026=EDGE_CURVE('',#4063,#3984,#481,.T.);
#5027=EDGE_CURVE('',#4036,#4046,#482,.T.);
#5028=EDGE_CURVE('',#4047,#4038,#483,.T.);
#5029=EDGE_CURVE('',#4075,#4076,#3557,.T.);
#5030=EDGE_CURVE('',#4045,#4076,#3270,.T.);
#5031=EDGE_CURVE('',#4044,#4075,#3271,.T.);
#5032=EDGE_CURVE('',#4077,#4078,#3272,.T.);
#5033=EDGE_CURVE('',#4077,#4076,#484,.T.);
#5034=EDGE_CURVE('',#4075,#4079,#485,.T.);
#5035=EDGE_CURVE('',#4078,#4079,#3273,.T.);
#5036=EDGE_CURVE('',#3966,#4039,#486,.T.);
#5037=EDGE_CURVE('',#4038,#3955,#487,.T.);
#5038=EDGE_CURVE('',#4080,#4081,#3558,.T.);
#5039=EDGE_CURVE('',#4081,#4036,#488,.T.);
#5040=EDGE_CURVE('',#4037,#4080,#489,.T.);
#5041=EDGE_CURVE('',#4082,#4083,#113,.T.);
#5042=EDGE_CURVE('',#4082,#4081,#3274,.T.);
#5043=EDGE_CURVE('',#4080,#4083,#3275,.T.);
#5044=EDGE_CURVE('',#3935,#4068,#3559,.T.);
#5045=EDGE_CURVE('',#4084,#3934,#3560,.T.);
#5046=EDGE_CURVE('',#4084,#4069,#3276,.T.);
#5047=EDGE_CURVE('',#4070,#3952,#3561,.T.);
#5048=EDGE_CURVE('',#4085,#4084,#490,.T.);
#5049=EDGE_CURVE('',#4049,#4085,#3277,.T.);
#5050=EDGE_CURVE('',#4086,#4014,#3562,.T.);
#5051=EDGE_CURVE('',#3952,#4086,#3278,.F.);
#5052=EDGE_CURVE('',#4058,#4087,#491,.T.);
#5053=EDGE_CURVE('',#4087,#4088,#3563,.T.);
#5054=EDGE_CURVE('',#4088,#4057,#492,.T.);
#5055=EDGE_CURVE('',#4079,#4089,#493,.T.);
#5056=EDGE_CURVE('',#4090,#4089,#3564,.T.);
#5057=EDGE_CURVE('',#4090,#4078,#494,.T.);
#5058=EDGE_CURVE('',#4091,#4081,#495,.T.);
#5059=EDGE_CURVE('',#4092,#4091,#3279,.T.);
#5060=EDGE_CURVE('',#4089,#4092,#496,.T.);
#5061=EDGE_CURVE('',#4093,#4082,#497,.T.);
#5062=EDGE_CURVE('',#4093,#4091,#3565,.T.);
#5063=EDGE_CURVE('',#3964,#3975,#498,.T.);
#5064=EDGE_CURVE('',#3978,#3960,#499,.T.);
#5065=EDGE_CURVE('',#4032,#3971,#500,.F.);
#5066=EDGE_CURVE('',#4094,#4092,#3566,.T.);
#5067=EDGE_CURVE('',#4093,#4094,#114,.T.);
#5068=EDGE_CURVE('',#4090,#4094,#501,.T.);
#5069=EDGE_CURVE('',#4071,#4095,#502,.T.);
#5070=EDGE_CURVE('',#4095,#4096,#3567,.T.);
#5071=EDGE_CURVE('',#4096,#4074,#503,.T.);
#5072=EDGE_CURVE('',#4097,#4098,#3568,.T.);
#5073=EDGE_CURVE('',#4098,#4096,#115,.T.);
#5074=EDGE_CURVE('',#4095,#4097,#3280,.T.);
#5075=EDGE_CURVE('',#4098,#4087,#504,.T.);
#5076=EDGE_CURVE('',#4097,#4088,#505,.T.);
#5077=EDGE_CURVE('',#4099,#4048,#3569,.T.);
#5078=EDGE_CURVE('',#4035,#4099,#3281,.F.);
#5079=EDGE_CURVE('',#4100,#4101,#3282,.F.);
#5080=EDGE_CURVE('',#4102,#4100,#3570,.T.);
#5081=EDGE_CURVE('',#4102,#4103,#3283,.T.);
#5082=EDGE_CURVE('',#4101,#4103,#3571,.T.);
#5083=EDGE_CURVE('',#3936,#4085,#3572,.T.);
#5084=EDGE_CURVE('',#4050,#3937,#3573,.T.);
#5085=EDGE_CURVE('',#4104,#3933,#3284,.T.);
#5086=EDGE_CURVE('',#4105,#3932,#3285,.F.);
#5087=EDGE_CURVE('',#4104,#4105,#3574,.T.);
#5088=EDGE_CURVE('',#4086,#4105,#506,.T.);
#5089=EDGE_CURVE('',#4105,#4101,#507,.T.);
#5090=EDGE_CURVE('',#4103,#4104,#508,.T.);
#5091=EDGE_CURVE('',#3924,#4102,#509,.T.);
#5092=EDGE_CURVE('',#4100,#3925,#510,.T.);
#5093=EDGE_CURVE('',#3937,#4099,#511,.T.);
#5094=EDGE_CURVE('',#4001,#4086,#512,.T.);
#5095=EDGE_CURVE('',#4099,#4100,#513,.T.);
#5096=EDGE_CURVE('',#4101,#4035,#514,.T.);
#5097=EDGE_CURVE('',#4004,#3991,#515,.F.);
#5098=EDGE_CURVE('',#3980,#3985,#516,.T.);
#5099=EDGE_CURVE('',#3968,#3961,#517,.T.);
#5100=EDGE_CURVE('',#4083,#4073,#518,.T.);
#5101=EDGE_CURVE('',#4106,#4107,#519,.T.);
#5102=EDGE_CURVE('',#4108,#4106,#3575,.T.);
#5103=EDGE_CURVE('',#4109,#4108,#520,.T.);
#5104=EDGE_CURVE('',#4110,#4109,#3576,.T.);
#5105=EDGE_CURVE('',#4111,#4110,#521,.T.);
#5106=EDGE_CURVE('',#4112,#4111,#3577,.T.);
#5107=EDGE_CURVE('',#4113,#4112,#522,.T.);
#5108=EDGE_CURVE('',#4107,#4113,#3578,.T.);
#5109=EDGE_CURVE('',#4114,#4115,#116,.T.);
#5110=EDGE_CURVE('',#4115,#4114,#117,.T.);
#5111=EDGE_CURVE('',#4116,#4117,#118,.T.);
#5112=EDGE_CURVE('',#4117,#4116,#119,.T.);
#5113=EDGE_CURVE('',#4118,#4107,#3579,.T.);
#5114=EDGE_CURVE('',#4118,#4060,#523,.T.);
#5115=EDGE_CURVE('',#4076,#4119,#524,.T.);
#5116=EDGE_CURVE('',#4119,#4120,#3286,.T.);
#5117=EDGE_CURVE('',#4120,#4121,#120,.T.);
#5118=EDGE_CURVE('',#4121,#4122,#3287,.T.);
#5119=EDGE_CURVE('',#4122,#4123,#121,.T.);
#5120=EDGE_CURVE('',#4123,#4124,#525,.T.);
#5121=EDGE_CURVE('',#4124,#4125,#122,.T.);
#5122=EDGE_CURVE('',#4125,#4126,#3288,.T.);
#5123=EDGE_CURVE('',#4126,#4127,#123,.T.);
#5124=EDGE_CURVE('',#4127,#4128,#3289,.T.);
#5125=EDGE_CURVE('',#4128,#4129,#526,.T.);
#5126=EDGE_CURVE('',#4129,#4106,#3580,.T.);
#5127=EDGE_CURVE('',#4077,#4130,#527,.T.);
#5128=EDGE_CURVE('',#4119,#4130,#528,.T.);
#5129=EDGE_CURVE('',#4131,#4118,#529,.T.);
#5130=EDGE_CURVE('',#4131,#4061,#530,.T.);
#5131=EDGE_CURVE('',#4132,#4090,#531,.T.);
#5132=EDGE_CURVE('',#4133,#4132,#532,.T.);
#5133=EDGE_CURVE('',#4133,#4130,#3290,.T.);
#5134=EDGE_CURVE('',#4134,#4131,#3581,.T.);
#5135=EDGE_CURVE('',#4135,#4134,#533,.T.);
#5136=EDGE_CURVE('',#4136,#4135,#3582,.T.);
#5137=EDGE_CURVE('',#4137,#4136,#534,.T.);
#5138=EDGE_CURVE('',#4137,#4138,#3291,.T.);
#5139=EDGE_CURVE('',#4139,#4138,#535,.T.);
#5140=EDGE_CURVE('',#4140,#4139,#536,.T.);
#5141=EDGE_CURVE('',#4140,#4141,#537,.T.);
#5142=EDGE_CURVE('',#4141,#4142,#3583,.T.);
#5143=EDGE_CURVE('',#4143,#4142,#538,.T.);
#5144=EDGE_CURVE('',#4144,#4143,#539,.T.);
#5145=EDGE_CURVE('',#4144,#4145,#540,.T.);
#5146=EDGE_CURVE('',#4145,#4146,#3584,.T.);
#5147=EDGE_CURVE('',#4147,#4146,#541,.T.);
#5148=EDGE_CURVE('',#4087,#4147,#542,.T.);
#5149=EDGE_CURVE('',#4094,#4148,#543,.T.);
#5150=EDGE_CURVE('',#4148,#4132,#544,.T.);
#5151=EDGE_CURVE('',#4146,#4098,#545,.T.);
#5152=EDGE_CURVE('',#4093,#4149,#546,.T.);
#5153=EDGE_CURVE('',#4148,#4149,#124,.T.);
#5154=EDGE_CURVE('',#4146,#4150,#3585,.T.);
#5155=EDGE_CURVE('',#4150,#4096,#547,.T.);
#5156=EDGE_CURVE('',#4151,#4152,#125,.T.);
#5157=EDGE_CURVE('',#4149,#4152,#548,.T.);
#5158=EDGE_CURVE('',#4083,#4151,#549,.T.);
#5159=EDGE_CURVE('',#4153,#4154,#550,.T.);
#5160=EDGE_CURVE('',#4155,#4154,#551,.T.);
#5161=EDGE_CURVE('',#4156,#4155,#552,.T.);
#5162=EDGE_CURVE('',#4156,#4157,#553,.T.);
#5163=EDGE_CURVE('',#4157,#4153,#126,.T.);
#5164=EDGE_CURVE('',#4150,#4158,#554,.T.);
#5165=EDGE_CURVE('',#4158,#4073,#555,.T.);
#5166=EDGE_CURVE('',#4159,#3949,#556,.T.);
#5167=EDGE_CURVE('',#3946,#4159,#557,.T.);
#5168=EDGE_CURVE('',#4160,#4161,#558,.T.);
#5169=EDGE_CURVE('',#4161,#4162,#3586,.T.);
#5170=EDGE_CURVE('',#4162,#4163,#559,.T.);
#5171=EDGE_CURVE('',#4163,#4160,#127,.T.);
#5172=EDGE_CURVE('',#4163,#4164,#3587,.T.);
#5173=EDGE_CURVE('',#4164,#4165,#128,.T.);
#5174=EDGE_CURVE('',#4165,#4160,#3588,.T.);
#5175=EDGE_CURVE('',#4166,#4167,#3589,.T.);
#5176=EDGE_CURVE('',#4167,#4168,#560,.T.);
#5177=EDGE_CURVE('',#4168,#4169,#3292,.F.);
#5178=EDGE_CURVE('',#4169,#4166,#561,.T.);
#5179=EDGE_CURVE('',#4170,#4171,#3590,.T.);
#5180=EDGE_CURVE('',#4171,#4167,#3293,.T.);
#5181=EDGE_CURVE('',#4166,#4170,#3294,.T.);
#5182=EDGE_CURVE('',#4164,#4171,#562,.T.);
#5183=EDGE_CURVE('',#4170,#4165,#563,.T.);
#5184=EDGE_CURVE('',#4172,#4173,#3591,.T.);
#5185=EDGE_CURVE('',#4173,#4162,#3295,.T.);
#5186=EDGE_CURVE('',#4161,#4172,#3296,.T.);
#5187=EDGE_CURVE('',#4174,#4175,#3297,.F.);
#5188=EDGE_CURVE('',#4175,#4173,#564,.T.);
#5189=EDGE_CURVE('',#4172,#4174,#565,.T.);
#5190=EDGE_CURVE('',#4176,#4160,#566,.T.);
#5191=EDGE_CURVE('',#4176,#4177,#567,.T.);
#5192=EDGE_CURVE('',#4177,#4174,#568,.F.);
#5193=EDGE_CURVE('',#4165,#4178,#569,.T.);
#5194=EDGE_CURVE('',#4178,#4176,#3298,.T.);
#5195=EDGE_CURVE('',#4169,#4179,#570,.F.);
#5196=EDGE_CURVE('',#4178,#4179,#571,.T.);
#5197=EDGE_CURVE('',#4180,#4181,#572,.T.);
#5198=EDGE_CURVE('',#4181,#4182,#3592,.T.);
#5199=EDGE_CURVE('',#4182,#4183,#573,.T.);
#5200=EDGE_CURVE('',#4183,#4180,#129,.T.);
#5201=EDGE_CURVE('',#4184,#4185,#3593,.T.);
#5202=EDGE_CURVE('',#4185,#4182,#3299,.T.);
#5203=EDGE_CURVE('',#4181,#4184,#3300,.T.);
#5204=EDGE_CURVE('',#4186,#4187,#3301,.F.);
#5205=EDGE_CURVE('',#4187,#4185,#574,.T.);
#5206=EDGE_CURVE('',#4184,#4186,#575,.T.);
#5207=EDGE_CURVE('',#4188,#4180,#3594,.T.);
#5208=EDGE_CURVE('',#4183,#4189,#3595,.T.);
#5209=EDGE_CURVE('',#4189,#4188,#130,.T.);
#5210=EDGE_CURVE('',#4190,#4191,#3596,.T.);
#5211=EDGE_CURVE('',#4191,#4192,#576,.T.);
#5212=EDGE_CURVE('',#4192,#4193,#3302,.F.);
#5213=EDGE_CURVE('',#4193,#4190,#577,.T.);
#5214=EDGE_CURVE('',#4194,#4195,#3597,.T.);
#5215=EDGE_CURVE('',#4195,#4191,#3303,.T.);
#5216=EDGE_CURVE('',#4190,#4194,#3304,.T.);
#5217=EDGE_CURVE('',#4189,#4195,#578,.T.);
#5218=EDGE_CURVE('',#4194,#4188,#579,.T.);
#5219=EDGE_CURVE('',#4196,#4180,#580,.T.);
#5220=EDGE_CURVE('',#4196,#4197,#581,.T.);
#5221=EDGE_CURVE('',#4197,#4186,#582,.F.);
#5222=EDGE_CURVE('',#4188,#4198,#583,.T.);
#5223=EDGE_CURVE('',#4198,#4196,#3305,.T.);
#5224=EDGE_CURVE('',#4193,#4199,#584,.F.);
#5225=EDGE_CURVE('',#4198,#4199,#585,.T.);
#5226=EDGE_CURVE('',#4200,#4201,#586,.T.);
#5227=EDGE_CURVE('',#4201,#4202,#3598,.T.);
#5228=EDGE_CURVE('',#4202,#4203,#587,.T.);
#5229=EDGE_CURVE('',#4203,#4200,#131,.T.);
#5230=EDGE_CURVE('',#4204,#4205,#3599,.T.);
#5231=EDGE_CURVE('',#4205,#4202,#3306,.T.);
#5232=EDGE_CURVE('',#4201,#4204,#3307,.T.);
#5233=EDGE_CURVE('',#4206,#4200,#3308,.T.);
#5234=EDGE_CURVE('',#4203,#4207,#3309,.T.);
#5235=EDGE_CURVE('',#4207,#4206,#132,.T.);
#5236=EDGE_CURVE('',#4207,#4208,#588,.T.);
#5237=EDGE_CURVE('',#4208,#4209,#3600,.T.);
#5238=EDGE_CURVE('',#4209,#4206,#589,.T.);
#5239=EDGE_CURVE('',#4210,#4211,#3601,.T.);
#5240=EDGE_CURVE('',#4211,#4209,#3310,.T.);
#5241=EDGE_CURVE('',#4208,#4210,#3311,.T.);
#5242=EDGE_CURVE('',#4204,#4212,#3312,.F.);
#5243=EDGE_CURVE('',#4212,#4213,#3602,.T.);
#5244=EDGE_CURVE('',#4213,#4205,#3313,.T.);
#5245=EDGE_CURVE('',#4212,#4214,#3314,.F.);
#5246=EDGE_CURVE('',#4214,#4213,#590,.T.);
#5247=EDGE_CURVE('',#4215,#4211,#3315,.F.);
#5248=EDGE_CURVE('',#4210,#4216,#3316,.T.);
#5249=EDGE_CURVE('',#4216,#4215,#3603,.T.);
#5250=EDGE_CURVE('',#4217,#4215,#3317,.F.);
#5251=EDGE_CURVE('',#4216,#4217,#591,.T.);
#5252=EDGE_CURVE('',#4213,#4218,#592,.T.);
#5253=EDGE_CURVE('',#4219,#4218,#3318,.T.);
#5254=EDGE_CURVE('',#4220,#4219,#3319,.T.);
#5255=EDGE_CURVE('',#4220,#4202,#593,.T.);
#5256=EDGE_CURVE('',#4217,#4214,#594,.T.);
#5257=EDGE_CURVE('',#4221,#4216,#595,.T.);
#5258=EDGE_CURVE('',#4222,#4221,#3320,.T.);
#5259=EDGE_CURVE('',#4223,#4222,#596,.T.);
#5260=EDGE_CURVE('',#4224,#4223,#597,.T.);
#5261=EDGE_CURVE('',#4225,#4224,#598,.T.);
#5262=EDGE_CURVE('',#4226,#4225,#3321,.T.);
#5263=EDGE_CURVE('',#4227,#4226,#599,.T.);
#5264=EDGE_CURVE('',#4228,#4227,#600,.T.);
#5265=EDGE_CURVE('',#4229,#4228,#601,.T.);
#5266=EDGE_CURVE('',#4218,#4229,#602,.T.);
#5267=EDGE_CURVE('',#4197,#4200,#603,.T.);
#5268=EDGE_CURVE('',#4196,#4204,#604,.F.);
#5269=EDGE_CURVE('',#4206,#4199,#605,.T.);
#5270=EDGE_CURVE('',#4199,#4197,#3322,.T.);
#5271=EDGE_CURVE('',#4230,#4231,#606,.T.);
#5272=EDGE_CURVE('',#4231,#4232,#3604,.T.);
#5273=EDGE_CURVE('',#4232,#4233,#607,.T.);
#5274=EDGE_CURVE('',#4233,#4230,#133,.T.);
#5275=EDGE_CURVE('',#4234,#4235,#3605,.T.);
#5276=EDGE_CURVE('',#4235,#4232,#3323,.T.);
#5277=EDGE_CURVE('',#4231,#4234,#3324,.T.);
#5278=EDGE_CURVE('',#4236,#4230,#3325,.T.);
#5279=EDGE_CURVE('',#4233,#4237,#3326,.T.);
#5280=EDGE_CURVE('',#4237,#4236,#134,.T.);
#5281=EDGE_CURVE('',#4237,#4220,#608,.T.);
#5282=EDGE_CURVE('',#4220,#4238,#3606,.T.);
#5283=EDGE_CURVE('',#4238,#4236,#609,.T.);
#5284=EDGE_CURVE('',#4219,#4239,#3607,.T.);
#5285=EDGE_CURVE('',#4239,#4238,#3327,.T.);
#5286=EDGE_CURVE('',#4234,#4240,#3328,.F.);
#5287=EDGE_CURVE('',#4240,#4227,#3608,.T.);
#5288=EDGE_CURVE('',#4227,#4235,#3329,.T.);
#5289=EDGE_CURVE('',#4240,#4228,#3330,.F.);
#5290=EDGE_CURVE('',#4241,#4239,#3331,.F.);
#5291=EDGE_CURVE('',#4218,#4241,#3609,.T.);
#5292=EDGE_CURVE('',#4229,#4241,#3332,.F.);
#5293=EDGE_CURVE('',#4226,#4242,#3610,.T.);
#5294=EDGE_CURVE('',#4242,#4232,#610,.T.);
#5295=EDGE_CURVE('',#4177,#4230,#611,.T.);
#5296=EDGE_CURVE('',#4176,#4234,#612,.F.);
#5297=EDGE_CURVE('',#4236,#4179,#613,.T.);
#5298=EDGE_CURVE('',#4179,#4177,#3333,.T.);
#5299=EDGE_CURVE('',#4243,#4244,#3611,.T.);
#5300=EDGE_CURVE('',#4245,#4243,#3334,.F.);
#5301=EDGE_CURVE('',#4246,#4245,#3612,.T.);
#5302=EDGE_CURVE('',#4246,#4244,#3335,.T.);
#5303=EDGE_CURVE('',#4247,#4124,#3613,.T.);
#5304=EDGE_CURVE('',#4248,#4247,#135,.F.);
#5305=EDGE_CURVE('',#4127,#4248,#3614,.T.);
#5306=EDGE_CURVE('',#4249,#4250,#3615,.F.);
#5307=EDGE_CURVE('',#4224,#4249,#3616,.F.);
#5308=EDGE_CURVE('',#4250,#4224,#3617,.F.);
#5309=EDGE_CURVE('',#4251,#4225,#136,.T.);
#5310=EDGE_CURVE('',#4249,#4248,#614,.T.);
#5311=EDGE_CURVE('',#4247,#4252,#615,.T.);
#5312=EDGE_CURVE('',#4252,#4253,#137,.T.);
#5313=EDGE_CURVE('',#4253,#4251,#616,.T.);
#5314=EDGE_CURVE('',#4254,#4120,#3618,.T.);
#5315=EDGE_CURVE('',#4255,#4254,#138,.F.);
#5316=EDGE_CURVE('',#4123,#4255,#3619,.T.);
#5317=EDGE_CURVE('',#4255,#4247,#617,.T.);
#5318=EDGE_CURVE('',#4256,#4133,#3336,.T.);
#5319=EDGE_CURVE('',#4256,#4257,#618,.T.);
#5320=EDGE_CURVE('',#4257,#4119,#3620,.T.);
#5321=EDGE_CURVE('',#4257,#4254,#3337,.T.);
#5322=EDGE_CURVE('',#4258,#4259,#3621,.T.);
#5323=EDGE_CURVE('',#4260,#4258,#3338,.F.);
#5324=EDGE_CURVE('',#4261,#4260,#3622,.T.);
#5325=EDGE_CURVE('',#4261,#4259,#3339,.T.);
#5326=EDGE_CURVE('',#4223,#4262,#3623,.F.);
#5327=EDGE_CURVE('',#4263,#4223,#3624,.F.);
#5328=EDGE_CURVE('',#4262,#4263,#3625,.F.);
#5329=EDGE_CURVE('',#4264,#4265,#139,.T.);
#5330=EDGE_CURVE('',#4265,#4255,#619,.T.);
#5331=EDGE_CURVE('',#4254,#4263,#620,.T.);
#5332=EDGE_CURVE('',#4222,#4266,#140,.T.);
#5333=EDGE_CURVE('',#4266,#4264,#621,.T.);
#5334=EDGE_CURVE('',#4258,#4262,#622,.T.);
#5335=EDGE_CURVE('',#4263,#4260,#623,.T.);
#5336=EDGE_CURVE('',#4262,#4250,#624,.T.);
#5337=EDGE_CURVE('',#4267,#4268,#3626,.T.);
#5338=EDGE_CURVE('',#4268,#4261,#625,.T.);
#5339=EDGE_CURVE('',#4260,#4267,#626,.T.);
#5340=EDGE_CURVE('',#4151,#4268,#3340,.T.);
#5341=EDGE_CURVE('',#4267,#4152,#3341,.T.);
#5342=EDGE_CURVE('',#4195,#4258,#627,.T.);
#5343=EDGE_CURVE('',#4259,#4191,#628,.T.);
#5344=EDGE_CURVE('',#4243,#4249,#629,.T.);
#5345=EDGE_CURVE('',#4250,#4245,#630,.T.);
#5346=EDGE_CURVE('',#4269,#4128,#3627,.T.);
#5347=EDGE_CURVE('',#4248,#4269,#3342,.T.);
#5348=EDGE_CURVE('',#4270,#4271,#3343,.T.);
#5349=EDGE_CURVE('',#4270,#4128,#631,.T.);
#5350=EDGE_CURVE('',#4269,#4272,#632,.T.);
#5351=EDGE_CURVE('',#4271,#4272,#3344,.T.);
#5352=EDGE_CURVE('',#4173,#4246,#633,.T.);
#5353=EDGE_CURVE('',#4245,#4162,#634,.T.);
#5354=EDGE_CURVE('',#4273,#4274,#3628,.T.);
#5355=EDGE_CURVE('',#4274,#4243,#635,.T.);
#5356=EDGE_CURVE('',#4244,#4273,#636,.T.);
#5357=EDGE_CURVE('',#4157,#4274,#3345,.T.);
#5358=EDGE_CURVE('',#4273,#4153,#3346,.T.);
#5359=EDGE_CURVE('',#3949,#4264,#3629,.T.);
#5360=EDGE_CURVE('',#4275,#3948,#3630,.T.);
#5361=EDGE_CURVE('',#4275,#4265,#3347,.T.);
#5362=EDGE_CURVE('',#4266,#4159,#3631,.T.);
#5363=EDGE_CURVE('',#4276,#4275,#637,.T.);
#5364=EDGE_CURVE('',#4252,#4276,#3348,.T.);
#5365=EDGE_CURVE('',#4277,#4221,#3632,.T.);
#5366=EDGE_CURVE('',#4159,#4277,#3349,.F.);
#5367=EDGE_CURVE('',#4132,#4278,#3633,.T.);
#5368=EDGE_CURVE('',#4278,#4256,#638,.T.);
#5369=EDGE_CURVE('',#4272,#4279,#639,.T.);
#5370=EDGE_CURVE('',#4280,#4279,#3634,.T.);
#5371=EDGE_CURVE('',#4280,#4271,#640,.T.);
#5372=EDGE_CURVE('',#4281,#4274,#641,.T.);
#5373=EDGE_CURVE('',#4282,#4281,#3350,.T.);
#5374=EDGE_CURVE('',#4279,#4282,#642,.T.);
#5375=EDGE_CURVE('',#4156,#4281,#3635,.T.);
#5376=EDGE_CURVE('',#4171,#4182,#643,.T.);
#5377=EDGE_CURVE('',#4185,#4167,#644,.T.);
#5378=EDGE_CURVE('',#4239,#4178,#645,.F.);
#5379=EDGE_CURVE('',#4283,#4282,#3636,.T.);
#5380=EDGE_CURVE('',#4156,#4283,#141,.T.);
#5381=EDGE_CURVE('',#4280,#4283,#646,.T.);
#5382=EDGE_CURVE('',#4267,#4284,#647,.T.);
#5383=EDGE_CURVE('',#4284,#4149,#3637,.T.);
#5384=EDGE_CURVE('',#4285,#4148,#3638,.T.);
#5385=EDGE_CURVE('',#4284,#4285,#3351,.T.);
#5386=EDGE_CURVE('',#4285,#4278,#648,.T.);
#5387=EDGE_CURVE('',#4286,#4251,#3639,.T.);
#5388=EDGE_CURVE('',#4242,#4286,#3352,.F.);
#5389=EDGE_CURVE('',#4287,#4288,#3353,.F.);
#5390=EDGE_CURVE('',#4289,#4287,#3640,.T.);
#5391=EDGE_CURVE('',#4289,#4290,#3354,.T.);
#5392=EDGE_CURVE('',#4288,#4290,#3641,.T.);
#5393=EDGE_CURVE('',#3950,#4276,#3642,.T.);
#5394=EDGE_CURVE('',#4253,#3951,#3643,.T.);
#5395=EDGE_CURVE('',#4291,#3947,#3355,.T.);
#5396=EDGE_CURVE('',#4292,#3946,#3356,.F.);
#5397=EDGE_CURVE('',#4291,#4292,#3644,.T.);
#5398=EDGE_CURVE('',#4277,#4292,#649,.T.);
#5399=EDGE_CURVE('',#4292,#4288,#650,.T.);
#5400=EDGE_CURVE('',#4290,#4291,#651,.T.);
#5401=EDGE_CURVE('',#3938,#4289,#652,.T.);
#5402=EDGE_CURVE('',#4287,#3939,#653,.T.);
#5403=EDGE_CURVE('',#3951,#4286,#654,.T.);
#5404=EDGE_CURVE('',#4208,#4277,#655,.T.);
#5405=EDGE_CURVE('',#4286,#4287,#656,.T.);
#5406=EDGE_CURVE('',#4288,#4242,#657,.T.);
#5407=EDGE_CURVE('',#4211,#4198,#658,.F.);
#5408=EDGE_CURVE('',#4187,#4192,#659,.T.);
#5409=EDGE_CURVE('',#4175,#4168,#660,.T.);
#5410=EDGE_CURVE('',#4153,#4151,#661,.T.);
#5411=EDGE_CURVE('',#4270,#4293,#662,.T.);
#5412=EDGE_CURVE('',#4129,#4293,#663,.T.);
#5413=EDGE_CURVE('',#4294,#4280,#664,.T.);
#5414=EDGE_CURVE('',#4294,#4295,#665,.T.);
#5415=EDGE_CURVE('',#4295,#4296,#3645,.T.);
#5416=EDGE_CURVE('',#4297,#4296,#666,.T.);
#5417=EDGE_CURVE('',#4298,#4297,#667,.T.);
#5418=EDGE_CURVE('',#4298,#4299,#668,.T.);
#5419=EDGE_CURVE('',#4299,#4300,#3646,.T.);
#5420=EDGE_CURVE('',#4301,#4300,#669,.T.);
#5421=EDGE_CURVE('',#4302,#4301,#670,.T.);
#5422=EDGE_CURVE('',#4303,#4302,#671,.T.);
#5423=EDGE_CURVE('',#4303,#4304,#3357,.T.);
#5424=EDGE_CURVE('',#4305,#4304,#672,.T.);
#5425=EDGE_CURVE('',#4306,#4305,#3647,.T.);
#5426=EDGE_CURVE('',#4307,#4306,#673,.T.);
#5427=EDGE_CURVE('',#4293,#4307,#3648,.T.);
#5428=EDGE_CURVE('',#4283,#4295,#674,.T.);
#5429=EDGE_CURVE('',#4295,#4155,#3649,.T.);
#5430=EDGE_CURVE('',#4308,#4309,#675,.T.);
#5431=EDGE_CURVE('',#4308,#4310,#3650,.T.);
#5432=EDGE_CURVE('',#4310,#4311,#676,.T.);
#5433=EDGE_CURVE('',#4309,#4311,#3651,.T.);
#5434=EDGE_CURVE('',#4312,#4313,#677,.T.);
#5435=EDGE_CURVE('',#4312,#4308,#678,.T.);
#5436=EDGE_CURVE('',#4313,#4309,#679,.T.);
#5437=EDGE_CURVE('',#4314,#4315,#680,.T.);
#5438=EDGE_CURVE('',#4314,#4312,#3652,.T.);
#5439=EDGE_CURVE('',#4315,#4313,#3653,.T.);
#5440=EDGE_CURVE('',#4316,#3907,#681,.T.);
#5441=EDGE_CURVE('',#3904,#4316,#682,.T.);
#5442=EDGE_CURVE('',#4317,#4318,#683,.T.);
#5443=EDGE_CURVE('',#4318,#4319,#3654,.T.);
#5444=EDGE_CURVE('',#4319,#4320,#684,.T.);
#5445=EDGE_CURVE('',#4320,#4317,#142,.T.);
#5446=EDGE_CURVE('',#4320,#4321,#3655,.T.);
#5447=EDGE_CURVE('',#4321,#4322,#143,.T.);
#5448=EDGE_CURVE('',#4322,#4317,#3656,.T.);
#5449=EDGE_CURVE('',#4323,#4324,#3657,.T.);
#5450=EDGE_CURVE('',#4324,#4325,#685,.T.);
#5451=EDGE_CURVE('',#4325,#4326,#3358,.F.);
#5452=EDGE_CURVE('',#4326,#4323,#686,.T.);
#5453=EDGE_CURVE('',#4327,#4328,#3658,.T.);
#5454=EDGE_CURVE('',#4328,#4324,#3359,.T.);
#5455=EDGE_CURVE('',#4323,#4327,#3360,.T.);
#5456=EDGE_CURVE('',#4321,#4328,#687,.T.);
#5457=EDGE_CURVE('',#4327,#4322,#688,.T.);
#5458=EDGE_CURVE('',#4329,#4330,#3659,.T.);
#5459=EDGE_CURVE('',#4330,#4319,#3361,.T.);
#5460=EDGE_CURVE('',#4318,#4329,#3362,.T.);
#5461=EDGE_CURVE('',#4331,#4332,#3363,.F.);
#5462=EDGE_CURVE('',#4332,#4330,#689,.T.);
#5463=EDGE_CURVE('',#4329,#4331,#690,.T.);
#5464=EDGE_CURVE('',#4333,#4317,#691,.T.);
#5465=EDGE_CURVE('',#4333,#4334,#692,.T.);
#5466=EDGE_CURVE('',#4334,#4331,#693,.F.);
#5467=EDGE_CURVE('',#4322,#4335,#694,.T.);
#5468=EDGE_CURVE('',#4335,#4333,#3364,.T.);
#5469=EDGE_CURVE('',#4326,#4336,#695,.F.);
#5470=EDGE_CURVE('',#4335,#4336,#696,.T.);
#5471=EDGE_CURVE('',#4337,#4338,#697,.T.);
#5472=EDGE_CURVE('',#4338,#4339,#3660,.T.);
#5473=EDGE_CURVE('',#4339,#4340,#698,.T.);
#5474=EDGE_CURVE('',#4340,#4337,#144,.T.);
#5475=EDGE_CURVE('',#4341,#4342,#3661,.T.);
#5476=EDGE_CURVE('',#4342,#4339,#3365,.T.);
#5477=EDGE_CURVE('',#4338,#4341,#3366,.T.);
#5478=EDGE_CURVE('',#4343,#4344,#3367,.F.);
#5479=EDGE_CURVE('',#4344,#4342,#699,.T.);
#5480=EDGE_CURVE('',#4341,#4343,#700,.T.);
#5481=EDGE_CURVE('',#4345,#4337,#3662,.T.);
#5482=EDGE_CURVE('',#4340,#4346,#3663,.T.);
#5483=EDGE_CURVE('',#4346,#4345,#145,.T.);
#5484=EDGE_CURVE('',#4347,#4348,#3664,.T.);
#5485=EDGE_CURVE('',#4348,#4349,#701,.T.);
#5486=EDGE_CURVE('',#4349,#4350,#3368,.F.);
#5487=EDGE_CURVE('',#4350,#4347,#702,.T.);
#5488=EDGE_CURVE('',#4351,#4352,#3665,.T.);
#5489=EDGE_CURVE('',#4352,#4348,#3369,.T.);
#5490=EDGE_CURVE('',#4347,#4351,#3370,.T.);
#5491=EDGE_CURVE('',#4346,#4352,#703,.T.);
#5492=EDGE_CURVE('',#4351,#4345,#704,.T.);
#5493=EDGE_CURVE('',#4353,#4337,#705,.T.);
#5494=EDGE_CURVE('',#4353,#4354,#706,.T.);
#5495=EDGE_CURVE('',#4354,#4343,#707,.F.);
#5496=EDGE_CURVE('',#4345,#4355,#708,.T.);
#5497=EDGE_CURVE('',#4355,#4353,#3371,.T.);
#5498=EDGE_CURVE('',#4350,#4356,#709,.F.);
#5499=EDGE_CURVE('',#4355,#4356,#710,.T.);
#5500=EDGE_CURVE('',#4357,#4358,#711,.T.);
#5501=EDGE_CURVE('',#4358,#4359,#3666,.T.);
#5502=EDGE_CURVE('',#4359,#4360,#712,.T.);
#5503=EDGE_CURVE('',#4360,#4357,#146,.T.);
#5504=EDGE_CURVE('',#4361,#4362,#3667,.T.);
#5505=EDGE_CURVE('',#4362,#4359,#3372,.T.);
#5506=EDGE_CURVE('',#4358,#4361,#3373,.T.);
#5507=EDGE_CURVE('',#4363,#4357,#3374,.T.);
#5508=EDGE_CURVE('',#4360,#4364,#3375,.T.);
#5509=EDGE_CURVE('',#4364,#4363,#147,.T.);
#5510=EDGE_CURVE('',#4364,#4365,#713,.T.);
#5511=EDGE_CURVE('',#4365,#4366,#3668,.T.);
#5512=EDGE_CURVE('',#4366,#4363,#714,.T.);
#5513=EDGE_CURVE('',#4367,#4368,#3669,.T.);
#5514=EDGE_CURVE('',#4368,#4366,#3376,.T.);
#5515=EDGE_CURVE('',#4365,#4367,#3377,.T.);
#5516=EDGE_CURVE('',#4361,#4369,#3378,.F.);
#5517=EDGE_CURVE('',#4369,#4370,#3670,.T.);
#5518=EDGE_CURVE('',#4370,#4362,#3379,.T.);
#5519=EDGE_CURVE('',#4369,#4371,#3380,.F.);
#5520=EDGE_CURVE('',#4371,#4370,#715,.T.);
#5521=EDGE_CURVE('',#4372,#4368,#3381,.F.);
#5522=EDGE_CURVE('',#4367,#4373,#3382,.T.);
#5523=EDGE_CURVE('',#4373,#4372,#3671,.T.);
#5524=EDGE_CURVE('',#4374,#4372,#3383,.F.);
#5525=EDGE_CURVE('',#4373,#4374,#716,.T.);
#5526=EDGE_CURVE('',#4370,#4375,#717,.T.);
#5527=EDGE_CURVE('',#4376,#4375,#3384,.T.);
#5528=EDGE_CURVE('',#4377,#4376,#3385,.T.);
#5529=EDGE_CURVE('',#4377,#4359,#718,.T.);
#5530=EDGE_CURVE('',#4374,#4371,#719,.T.);
#5531=EDGE_CURVE('',#4378,#4373,#720,.T.);
#5532=EDGE_CURVE('',#4379,#4378,#3386,.T.);
#5533=EDGE_CURVE('',#4380,#4379,#721,.T.);
#5534=EDGE_CURVE('',#4381,#4380,#722,.T.);
#5535=EDGE_CURVE('',#4382,#4381,#723,.T.);
#5536=EDGE_CURVE('',#4383,#4382,#3387,.T.);
#5537=EDGE_CURVE('',#4384,#4383,#724,.T.);
#5538=EDGE_CURVE('',#4385,#4384,#725,.T.);
#5539=EDGE_CURVE('',#4386,#4385,#726,.T.);
#5540=EDGE_CURVE('',#4375,#4386,#727,.T.);
#5541=EDGE_CURVE('',#4354,#4357,#728,.T.);
#5542=EDGE_CURVE('',#4353,#4361,#729,.F.);
#5543=EDGE_CURVE('',#4363,#4356,#730,.T.);
#5544=EDGE_CURVE('',#4356,#4354,#3388,.T.);
#5545=EDGE_CURVE('',#4387,#4388,#731,.T.);
#5546=EDGE_CURVE('',#4388,#4389,#3672,.T.);
#5547=EDGE_CURVE('',#4389,#4390,#732,.T.);
#5548=EDGE_CURVE('',#4390,#4387,#148,.T.);
#5549=EDGE_CURVE('',#4391,#4392,#3673,.T.);
#5550=EDGE_CURVE('',#4392,#4389,#3389,.T.);
#5551=EDGE_CURVE('',#4388,#4391,#3390,.T.);
#5552=EDGE_CURVE('',#4393,#4387,#3391,.T.);
#5553=EDGE_CURVE('',#4390,#4394,#3392,.T.);
#5554=EDGE_CURVE('',#4394,#4393,#149,.T.);
#5555=EDGE_CURVE('',#4394,#4377,#733,.T.);
#5556=EDGE_CURVE('',#4377,#4395,#3674,.T.);
#5557=EDGE_CURVE('',#4395,#4393,#734,.T.);
#5558=EDGE_CURVE('',#4376,#4396,#3675,.T.);
#5559=EDGE_CURVE('',#4396,#4395,#3393,.T.);
#5560=EDGE_CURVE('',#4391,#4397,#3394,.F.);
#5561=EDGE_CURVE('',#4397,#4384,#3676,.T.);
#5562=EDGE_CURVE('',#4384,#4392,#3395,.T.);
#5563=EDGE_CURVE('',#4397,#4385,#3396,.F.);
#5564=EDGE_CURVE('',#4398,#4396,#3397,.F.);
#5565=EDGE_CURVE('',#4375,#4398,#3677,.T.);
#5566=EDGE_CURVE('',#4386,#4398,#3398,.F.);
#5567=EDGE_CURVE('',#4383,#4399,#3678,.T.);
#5568=EDGE_CURVE('',#4399,#4389,#735,.T.);
#5569=EDGE_CURVE('',#4334,#4387,#736,.T.);
#5570=EDGE_CURVE('',#4333,#4391,#737,.F.);
#5571=EDGE_CURVE('',#4393,#4336,#738,.T.);
#5572=EDGE_CURVE('',#4336,#4334,#3399,.T.);
#5573=EDGE_CURVE('',#4400,#4401,#3679,.T.);
#5574=EDGE_CURVE('',#4402,#4400,#3400,.F.);
#5575=EDGE_CURVE('',#4403,#4402,#3680,.T.);
#5576=EDGE_CURVE('',#4403,#4401,#3401,.T.);
#5577=EDGE_CURVE('',#4404,#4405,#3402,.T.);
#5578=EDGE_CURVE('',#4406,#4404,#150,.T.);
#5579=EDGE_CURVE('',#4407,#4406,#3681,.T.);
#5580=EDGE_CURVE('',#4408,#4407,#151,.F.);
#5581=EDGE_CURVE('',#4409,#4408,#3682,.T.);
#5582=EDGE_CURVE('',#4405,#4409,#152,.T.);
#5583=EDGE_CURVE('',#4410,#4411,#3683,.F.);
#5584=EDGE_CURVE('',#4381,#4410,#3684,.F.);
#5585=EDGE_CURVE('',#4411,#4381,#3685,.F.);
#5586=EDGE_CURVE('',#4412,#4382,#153,.T.);
#5587=EDGE_CURVE('',#4410,#4408,#739,.T.);
#5588=EDGE_CURVE('',#4407,#4413,#740,.T.);
#5589=EDGE_CURVE('',#4413,#4414,#154,.T.);
#5590=EDGE_CURVE('',#4414,#4412,#741,.T.);
#5591=EDGE_CURVE('',#4415,#4416,#3403,.T.);
#5592=EDGE_CURVE('',#4417,#4415,#155,.T.);
#5593=EDGE_CURVE('',#4418,#4417,#3686,.T.);
#5594=EDGE_CURVE('',#4419,#4418,#156,.F.);
#5595=EDGE_CURVE('',#4420,#4419,#3687,.T.);
#5596=EDGE_CURVE('',#4416,#4420,#157,.T.);
#5597=EDGE_CURVE('',#4420,#4406,#742,.T.);
#5598=EDGE_CURVE('',#4419,#4407,#743,.T.);
#5599=EDGE_CURVE('',#4421,#4422,#3404,.T.);
#5600=EDGE_CURVE('',#4421,#4423,#744,.T.);
#5601=EDGE_CURVE('',#4423,#4424,#3688,.T.);
#5602=EDGE_CURVE('',#4424,#4425,#745,.T.);
#5603=EDGE_CURVE('',#4422,#4425,#3405,.T.);
#5604=EDGE_CURVE('',#4424,#4417,#3406,.T.);
#5605=EDGE_CURVE('',#4423,#4418,#3407,.T.);
#5606=EDGE_CURVE('',#4426,#4427,#3689,.T.);
#5607=EDGE_CURVE('',#4428,#4426,#3408,.F.);
#5608=EDGE_CURVE('',#4429,#4428,#3690,.T.);
#5609=EDGE_CURVE('',#4429,#4427,#3409,.T.);
#5610=EDGE_CURVE('',#4380,#4430,#3691,.F.);
#5611=EDGE_CURVE('',#4431,#4380,#3692,.F.);
#5612=EDGE_CURVE('',#4430,#4431,#3693,.F.);
#5613=EDGE_CURVE('',#4432,#4433,#158,.T.);
#5614=EDGE_CURVE('',#4433,#4419,#746,.T.);
#5615=EDGE_CURVE('',#4418,#4431,#747,.T.);
#5616=EDGE_CURVE('',#4379,#4434,#159,.T.);
#5617=EDGE_CURVE('',#4434,#4432,#748,.T.);
#5618=EDGE_CURVE('',#4426,#4430,#749,.T.);
#5619=EDGE_CURVE('',#4431,#4428,#750,.T.);
#5620=EDGE_CURVE('',#4430,#4411,#751,.T.);
#5621=EDGE_CURVE('',#4435,#4436,#3694,.T.);
#5622=EDGE_CURVE('',#4436,#4429,#752,.T.);
#5623=EDGE_CURVE('',#4428,#4435,#753,.T.);
#5624=EDGE_CURVE('',#4437,#4438,#160,.T.);
#5625=EDGE_CURVE('',#4437,#4436,#3410,.T.);
#5626=EDGE_CURVE('',#4435,#4438,#3411,.T.);
#5627=EDGE_CURVE('',#4352,#4426,#754,.T.);
#5628=EDGE_CURVE('',#4427,#4348,#755,.T.);
#5629=EDGE_CURVE('',#4400,#4410,#756,.T.);
#5630=EDGE_CURVE('',#4411,#4402,#757,.T.);
#5631=EDGE_CURVE('',#4439,#4440,#3695,.T.);
#5632=EDGE_CURVE('',#4409,#4440,#3412,.T.);
#5633=EDGE_CURVE('',#4408,#4439,#3413,.T.);
#5634=EDGE_CURVE('',#4137,#4440,#758,.T.);
#5635=EDGE_CURVE('',#4439,#4441,#759,.T.);
#5636=EDGE_CURVE('',#4138,#4441,#3414,.T.);
#5637=EDGE_CURVE('',#4330,#4403,#760,.T.);
#5638=EDGE_CURVE('',#4402,#4319,#761,.T.);
#5639=EDGE_CURVE('',#4442,#4443,#3696,.T.);
#5640=EDGE_CURVE('',#4443,#4400,#762,.T.);
#5641=EDGE_CURVE('',#4401,#4442,#763,.T.);
#5642=EDGE_CURVE('',#4444,#4445,#161,.T.);
#5643=EDGE_CURVE('',#4444,#4443,#3415,.T.);
#5644=EDGE_CURVE('',#4442,#4445,#3416,.T.);
#5645=EDGE_CURVE('',#3907,#4432,#3697,.T.);
#5646=EDGE_CURVE('',#4446,#3906,#3698,.T.);
#5647=EDGE_CURVE('',#4446,#4433,#3417,.T.);
#5648=EDGE_CURVE('',#4434,#4316,#3699,.T.);
#5649=EDGE_CURVE('',#4447,#4446,#764,.T.);
#5650=EDGE_CURVE('',#4413,#4447,#3418,.T.);
#5651=EDGE_CURVE('',#4448,#4378,#3700,.T.);
#5652=EDGE_CURVE('',#4316,#4448,#3419,.F.);
#5653=EDGE_CURVE('',#4422,#4449,#765,.T.);
#5654=EDGE_CURVE('',#4449,#4450,#3701,.T.);
#5655=EDGE_CURVE('',#4450,#4421,#766,.T.);
#5656=EDGE_CURVE('',#4441,#4451,#767,.T.);
#5657=EDGE_CURVE('',#4139,#4451,#3702,.T.);
#5658=EDGE_CURVE('',#4452,#4443,#768,.T.);
#5659=EDGE_CURVE('',#4453,#4452,#3420,.T.);
#5660=EDGE_CURVE('',#4451,#4453,#769,.T.);
#5661=EDGE_CURVE('',#4454,#4444,#770,.T.);
#5662=EDGE_CURVE('',#4454,#4452,#3703,.T.);
#5663=EDGE_CURVE('',#4328,#4339,#771,.T.);
#5664=EDGE_CURVE('',#4342,#4324,#772,.T.);
#5665=EDGE_CURVE('',#4396,#4335,#773,.F.);
#5666=EDGE_CURVE('',#4455,#4453,#3704,.T.);
#5667=EDGE_CURVE('',#4454,#4455,#162,.T.);
#5668=EDGE_CURVE('',#4139,#4455,#774,.T.);
#5669=EDGE_CURVE('',#4435,#4456,#775,.T.);
#5670=EDGE_CURVE('',#4456,#4457,#3705,.T.);
#5671=EDGE_CURVE('',#4457,#4438,#776,.T.);
#5672=EDGE_CURVE('',#4458,#4459,#3706,.T.);
#5673=EDGE_CURVE('',#4459,#4457,#163,.T.);
#5674=EDGE_CURVE('',#4456,#4458,#3421,.T.);
#5675=EDGE_CURVE('',#4459,#4449,#777,.T.);
#5676=EDGE_CURVE('',#4458,#4450,#778,.T.);
#5677=EDGE_CURVE('',#4460,#4412,#3707,.T.);
#5678=EDGE_CURVE('',#4399,#4460,#3422,.F.);
#5679=EDGE_CURVE('',#4461,#4462,#3423,.F.);
#5680=EDGE_CURVE('',#4463,#4461,#3708,.T.);
#5681=EDGE_CURVE('',#4463,#4464,#3424,.T.);
#5682=EDGE_CURVE('',#4462,#4464,#3709,.T.);
#5683=EDGE_CURVE('',#3908,#4447,#3710,.T.);
#5684=EDGE_CURVE('',#4414,#3909,#3711,.T.);
#5685=EDGE_CURVE('',#4465,#3905,#3425,.T.);
#5686=EDGE_CURVE('',#4466,#3904,#3426,.F.);
#5687=EDGE_CURVE('',#4465,#4466,#3712,.T.);
#5688=EDGE_CURVE('',#4448,#4466,#779,.T.);
#5689=EDGE_CURVE('',#4466,#4462,#780,.T.);
#5690=EDGE_CURVE('',#4464,#4465,#781,.T.);
#5691=EDGE_CURVE('',#3896,#4463,#782,.T.);
#5692=EDGE_CURVE('',#4461,#3897,#783,.T.);
#5693=EDGE_CURVE('',#3909,#4460,#784,.T.);
#5694=EDGE_CURVE('',#4365,#4448,#785,.T.);
#5695=EDGE_CURVE('',#4460,#4461,#786,.T.);
#5696=EDGE_CURVE('',#4462,#4399,#787,.T.);
#5697=EDGE_CURVE('',#4368,#4355,#788,.F.);
#5698=EDGE_CURVE('',#4344,#4349,#789,.T.);
#5699=EDGE_CURVE('',#4332,#4325,#790,.T.);
#5700=EDGE_CURVE('',#4445,#4437,#791,.T.);
#5701=EDGE_CURVE('',#4467,#4110,#3713,.T.);
#5702=EDGE_CURVE('',#4468,#4467,#792,.T.);
#5703=EDGE_CURVE('',#4468,#4469,#3427,.T.);
#5704=EDGE_CURVE('',#4469,#4470,#164,.T.);
#5705=EDGE_CURVE('',#4470,#4471,#3428,.T.);
#5706=EDGE_CURVE('',#4471,#4472,#165,.T.);
#5707=EDGE_CURVE('',#4472,#4473,#793,.T.);
#5708=EDGE_CURVE('',#4473,#4474,#166,.T.);
#5709=EDGE_CURVE('',#4474,#4475,#3429,.T.);
#5710=EDGE_CURVE('',#4475,#4476,#167,.T.);
#5711=EDGE_CURVE('',#4476,#4477,#3430,.T.);
#5712=EDGE_CURVE('',#4424,#4477,#794,.T.);
#5713=EDGE_CURVE('',#4478,#4440,#795,.T.);
#5714=EDGE_CURVE('',#4478,#4111,#3714,.T.);
#5715=EDGE_CURVE('',#4478,#4136,#796,.T.);
#5716=EDGE_CURVE('',#4479,#4477,#797,.T.);
#5717=EDGE_CURVE('',#4479,#4425,#798,.T.);
#5718=EDGE_CURVE('',#4479,#4480,#3431,.T.);
#5719=EDGE_CURVE('',#4481,#4480,#799,.T.);
#5720=EDGE_CURVE('',#4449,#4481,#800,.T.);
#5721=EDGE_CURVE('',#4455,#4141,#801,.T.);
#5722=EDGE_CURVE('',#4481,#4482,#802,.T.);
#5723=EDGE_CURVE('',#4482,#4459,#803,.T.);
#5724=EDGE_CURVE('',#4454,#4483,#804,.T.);
#5725=EDGE_CURVE('',#4141,#4483,#3715,.T.);
#5726=EDGE_CURVE('',#4484,#4482,#168,.T.);
#5727=EDGE_CURVE('',#4484,#4457,#805,.T.);
#5728=EDGE_CURVE('',#4445,#4485,#806,.T.);
#5729=EDGE_CURVE('',#4483,#4485,#807,.T.);
#5730=EDGE_CURVE('',#4486,#4487,#169,.T.);
#5731=EDGE_CURVE('',#4488,#4487,#808,.T.);
#5732=EDGE_CURVE('',#4489,#4488,#809,.T.);
#5733=EDGE_CURVE('',#4489,#4490,#810,.T.);
#5734=EDGE_CURVE('',#4490,#4486,#811,.T.);
#5735=EDGE_CURVE('',#4491,#4437,#812,.T.);
#5736=EDGE_CURVE('',#4484,#4492,#813,.T.);
#5737=EDGE_CURVE('',#4492,#4491,#170,.T.);
#5738=EDGE_CURVE('',#4493,#3921,#814,.T.);
#5739=EDGE_CURVE('',#3918,#4493,#815,.T.);
#5740=EDGE_CURVE('',#4494,#4495,#816,.T.);
#5741=EDGE_CURVE('',#4495,#4496,#3716,.T.);
#5742=EDGE_CURVE('',#4496,#4497,#817,.T.);
#5743=EDGE_CURVE('',#4497,#4494,#171,.T.);
#5744=EDGE_CURVE('',#4497,#4498,#3717,.T.);
#5745=EDGE_CURVE('',#4498,#4499,#172,.T.);
#5746=EDGE_CURVE('',#4499,#4494,#3718,.T.);
#5747=EDGE_CURVE('',#4500,#4501,#3719,.T.);
#5748=EDGE_CURVE('',#4501,#4502,#818,.T.);
#5749=EDGE_CURVE('',#4502,#4503,#3432,.F.);
#5750=EDGE_CURVE('',#4503,#4500,#819,.T.);
#5751=EDGE_CURVE('',#4504,#4505,#3720,.T.);
#5752=EDGE_CURVE('',#4505,#4501,#3433,.T.);
#5753=EDGE_CURVE('',#4500,#4504,#3434,.T.);
#5754=EDGE_CURVE('',#4498,#4505,#820,.T.);
#5755=EDGE_CURVE('',#4504,#4499,#821,.T.);
#5756=EDGE_CURVE('',#4506,#4507,#3721,.T.);
#5757=EDGE_CURVE('',#4507,#4496,#3435,.T.);
#5758=EDGE_CURVE('',#4495,#4506,#3436,.T.);
#5759=EDGE_CURVE('',#4508,#4509,#3437,.F.);
#5760=EDGE_CURVE('',#4509,#4507,#822,.T.);
#5761=EDGE_CURVE('',#4506,#4508,#823,.T.);
#5762=EDGE_CURVE('',#4510,#4494,#824,.T.);
#5763=EDGE_CURVE('',#4510,#4511,#825,.T.);
#5764=EDGE_CURVE('',#4511,#4508,#826,.F.);
#5765=EDGE_CURVE('',#4499,#4512,#827,.T.);
#5766=EDGE_CURVE('',#4512,#4510,#3438,.T.);
#5767=EDGE_CURVE('',#4503,#4513,#828,.F.);
#5768=EDGE_CURVE('',#4512,#4513,#829,.T.);
#5769=EDGE_CURVE('',#4514,#4515,#830,.T.);
#5770=EDGE_CURVE('',#4515,#4516,#3722,.T.);
#5771=EDGE_CURVE('',#4516,#4517,#831,.T.);
#5772=EDGE_CURVE('',#4517,#4514,#173,.T.);
#5773=EDGE_CURVE('',#4518,#4519,#3723,.T.);
#5774=EDGE_CURVE('',#4519,#4516,#3439,.T.);
#5775=EDGE_CURVE('',#4515,#4518,#3440,.T.);
#5776=EDGE_CURVE('',#4520,#4521,#3441,.F.);
#5777=EDGE_CURVE('',#4521,#4519,#832,.T.);
#5778=EDGE_CURVE('',#4518,#4520,#833,.T.);
#5779=EDGE_CURVE('',#4522,#4514,#3724,.T.);
#5780=EDGE_CURVE('',#4517,#4523,#3725,.T.);
#5781=EDGE_CURVE('',#4523,#4522,#174,.T.);
#5782=EDGE_CURVE('',#4524,#4525,#3726,.T.);
#5783=EDGE_CURVE('',#4525,#4526,#834,.T.);
#5784=EDGE_CURVE('',#4526,#4527,#3442,.F.);
#5785=EDGE_CURVE('',#4527,#4524,#835,.T.);
#5786=EDGE_CURVE('',#4528,#4529,#3727,.T.);
#5787=EDGE_CURVE('',#4529,#4525,#3443,.T.);
#5788=EDGE_CURVE('',#4524,#4528,#3444,.T.);
#5789=EDGE_CURVE('',#4523,#4529,#836,.T.);
#5790=EDGE_CURVE('',#4528,#4522,#837,.T.);
#5791=EDGE_CURVE('',#4530,#4514,#838,.T.);
#5792=EDGE_CURVE('',#4530,#4531,#839,.T.);
#5793=EDGE_CURVE('',#4531,#4520,#840,.F.);
#5794=EDGE_CURVE('',#4522,#4532,#841,.T.);
#5795=EDGE_CURVE('',#4532,#4530,#3445,.T.);
#5796=EDGE_CURVE('',#4527,#4533,#842,.F.);
#5797=EDGE_CURVE('',#4532,#4533,#843,.T.);
#5798=EDGE_CURVE('',#4534,#4535,#844,.T.);
#5799=EDGE_CURVE('',#4535,#4536,#3728,.T.);
#5800=EDGE_CURVE('',#4536,#4537,#845,.T.);
#5801=EDGE_CURVE('',#4537,#4534,#175,.T.);
#5802=EDGE_CURVE('',#4538,#4539,#3729,.T.);
#5803=EDGE_CURVE('',#4539,#4536,#3446,.T.);
#5804=EDGE_CURVE('',#4535,#4538,#3447,.T.);
#5805=EDGE_CURVE('',#4540,#4534,#3448,.T.);
#5806=EDGE_CURVE('',#4537,#4541,#3449,.T.);
#5807=EDGE_CURVE('',#4541,#4540,#176,.T.);
#5808=EDGE_CURVE('',#4541,#4542,#846,.T.);
#5809=EDGE_CURVE('',#4542,#4543,#3730,.T.);
#5810=EDGE_CURVE('',#4543,#4540,#847,.T.);
#5811=EDGE_CURVE('',#4544,#4545,#3731,.T.);
#5812=EDGE_CURVE('',#4545,#4543,#3450,.T.);
#5813=EDGE_CURVE('',#4542,#4544,#3451,.T.);
#5814=EDGE_CURVE('',#4538,#4546,#3452,.F.);
#5815=EDGE_CURVE('',#4546,#4547,#3732,.T.);
#5816=EDGE_CURVE('',#4547,#4539,#3453,.T.);
#5817=EDGE_CURVE('',#4546,#4548,#3454,.F.);
#5818=EDGE_CURVE('',#4548,#4547,#848,.T.);
#5819=EDGE_CURVE('',#4549,#4545,#3455,.F.);
#5820=EDGE_CURVE('',#4544,#4550,#3456,.T.);
#5821=EDGE_CURVE('',#4550,#4549,#3733,.T.);
#5822=EDGE_CURVE('',#4551,#4549,#3457,.F.);
#5823=EDGE_CURVE('',#4550,#4551,#849,.T.);
#5824=EDGE_CURVE('',#4547,#4552,#850,.T.);
#5825=EDGE_CURVE('',#4553,#4552,#3458,.T.);
#5826=EDGE_CURVE('',#4554,#4553,#3459,.T.);
#5827=EDGE_CURVE('',#4554,#4536,#851,.T.);
#5828=EDGE_CURVE('',#4551,#4548,#852,.T.);
#5829=EDGE_CURVE('',#4555,#4550,#853,.T.);
#5830=EDGE_CURVE('',#4556,#4555,#3460,.T.);
#5831=EDGE_CURVE('',#4557,#4556,#854,.T.);
#5832=EDGE_CURVE('',#4558,#4557,#855,.T.);
#5833=EDGE_CURVE('',#4559,#4558,#856,.T.);
#5834=EDGE_CURVE('',#4560,#4559,#3461,.T.);
#5835=EDGE_CURVE('',#4561,#4560,#857,.T.);
#5836=EDGE_CURVE('',#4562,#4561,#858,.T.);
#5837=EDGE_CURVE('',#4563,#4562,#859,.T.);
#5838=EDGE_CURVE('',#4552,#4563,#860,.T.);
#5839=EDGE_CURVE('',#4531,#4534,#861,.T.);
#5840=EDGE_CURVE('',#4530,#4538,#862,.F.);
#5841=EDGE_CURVE('',#4540,#4533,#863,.T.);
#5842=EDGE_CURVE('',#4533,#4531,#3462,.T.);
#5843=EDGE_CURVE('',#4564,#4565,#864,.T.);
#5844=EDGE_CURVE('',#4565,#4566,#3734,.T.);
#5845=EDGE_CURVE('',#4566,#4567,#865,.T.);
#5846=EDGE_CURVE('',#4567,#4564,#177,.T.);
#5847=EDGE_CURVE('',#4568,#4569,#3735,.T.);
#5848=EDGE_CURVE('',#4569,#4566,#3463,.T.);
#5849=EDGE_CURVE('',#4565,#4568,#3464,.T.);
#5850=EDGE_CURVE('',#4570,#4564,#3465,.T.);
#5851=EDGE_CURVE('',#4567,#4571,#3466,.T.);
#5852=EDGE_CURVE('',#4571,#4570,#178,.T.);
#5853=EDGE_CURVE('',#4571,#4554,#866,.T.);
#5854=EDGE_CURVE('',#4554,#4572,#3736,.T.);
#5855=EDGE_CURVE('',#4572,#4570,#867,.T.);
#5856=EDGE_CURVE('',#4553,#4573,#3737,.T.);
#5857=EDGE_CURVE('',#4573,#4572,#3467,.T.);
#5858=EDGE_CURVE('',#4568,#4574,#3468,.F.);
#5859=EDGE_CURVE('',#4574,#4561,#3738,.T.);
#5860=EDGE_CURVE('',#4561,#4569,#3469,.T.);
#5861=EDGE_CURVE('',#4574,#4562,#3470,.F.);
#5862=EDGE_CURVE('',#4575,#4573,#3471,.F.);
#5863=EDGE_CURVE('',#4552,#4575,#3739,.T.);
#5864=EDGE_CURVE('',#4563,#4575,#3472,.F.);
#5865=EDGE_CURVE('',#4560,#4576,#3740,.T.);
#5866=EDGE_CURVE('',#4576,#4566,#868,.T.);
#5867=EDGE_CURVE('',#4511,#4564,#869,.T.);
#5868=EDGE_CURVE('',#4510,#4568,#870,.F.);
#5869=EDGE_CURVE('',#4570,#4513,#871,.T.);
#5870=EDGE_CURVE('',#4513,#4511,#3473,.T.);
#5871=EDGE_CURVE('',#4577,#4578,#3741,.T.);
#5872=EDGE_CURVE('',#4579,#4577,#3474,.F.);
#5873=EDGE_CURVE('',#4580,#4579,#3742,.T.);
#5874=EDGE_CURVE('',#4580,#4578,#3475,.T.);
#5875=EDGE_CURVE('',#4581,#4473,#3743,.T.);
#5876=EDGE_CURVE('',#4582,#4581,#179,.F.);
#5877=EDGE_CURVE('',#4476,#4582,#3744,.T.);
#5878=EDGE_CURVE('',#4583,#4584,#3745,.F.);
#5879=EDGE_CURVE('',#4558,#4583,#3746,.F.);
#5880=EDGE_CURVE('',#4584,#4558,#3747,.F.);
#5881=EDGE_CURVE('',#4585,#4559,#180,.T.);
#5882=EDGE_CURVE('',#4583,#4582,#872,.T.);
#5883=EDGE_CURVE('',#4581,#4586,#873,.T.);
#5884=EDGE_CURVE('',#4586,#4587,#181,.T.);
#5885=EDGE_CURVE('',#4587,#4585,#874,.T.);
#5886=EDGE_CURVE('',#4588,#4469,#3748,.T.);
#5887=EDGE_CURVE('',#4589,#4588,#182,.F.);
#5888=EDGE_CURVE('',#4472,#4589,#3749,.T.);
#5889=EDGE_CURVE('',#4589,#4581,#875,.T.);
#5890=EDGE_CURVE('',#4590,#4303,#3476,.T.);
#5891=EDGE_CURVE('',#4590,#4591,#876,.T.);
#5892=EDGE_CURVE('',#4591,#4468,#3750,.T.);
#5893=EDGE_CURVE('',#4468,#4304,#877,.T.);
#5894=EDGE_CURVE('',#4591,#4588,#3477,.T.);
#5895=EDGE_CURVE('',#4592,#4593,#3751,.T.);
#5896=EDGE_CURVE('',#4594,#4592,#3478,.F.);
#5897=EDGE_CURVE('',#4595,#4594,#3752,.T.);
#5898=EDGE_CURVE('',#4595,#4593,#3479,.T.);
#5899=EDGE_CURVE('',#4557,#4596,#3753,.F.);
#5900=EDGE_CURVE('',#4597,#4557,#3754,.F.);
#5901=EDGE_CURVE('',#4596,#4597,#3755,.F.);
#5902=EDGE_CURVE('',#4598,#4599,#183,.T.);
#5903=EDGE_CURVE('',#4599,#4589,#878,.T.);
#5904=EDGE_CURVE('',#4588,#4597,#879,.T.);
#5905=EDGE_CURVE('',#4556,#4600,#184,.T.);
#5906=EDGE_CURVE('',#4600,#4598,#880,.T.);
#5907=EDGE_CURVE('',#4592,#4596,#881,.T.);
#5908=EDGE_CURVE('',#4597,#4594,#882,.T.);
#5909=EDGE_CURVE('',#4596,#4584,#883,.T.);
#5910=EDGE_CURVE('',#4601,#4602,#3756,.T.);
#5911=EDGE_CURVE('',#4602,#4595,#884,.T.);
#5912=EDGE_CURVE('',#4594,#4601,#885,.T.);
#5913=EDGE_CURVE('',#4486,#4602,#3480,.T.);
#5914=EDGE_CURVE('',#4601,#4487,#3481,.T.);
#5915=EDGE_CURVE('',#4529,#4592,#886,.T.);
#5916=EDGE_CURVE('',#4593,#4525,#887,.T.);
#5917=EDGE_CURVE('',#4577,#4583,#888,.T.);
#5918=EDGE_CURVE('',#4584,#4579,#889,.T.);
#5919=EDGE_CURVE('',#4603,#4477,#3757,.T.);
#5920=EDGE_CURVE('',#4582,#4603,#3482,.T.);
#5921=EDGE_CURVE('',#4603,#4604,#890,.T.);
#5922=EDGE_CURVE('',#4480,#4604,#3483,.T.);
#5923=EDGE_CURVE('',#4507,#4580,#891,.T.);
#5924=EDGE_CURVE('',#4579,#4496,#892,.T.);
#5925=EDGE_CURVE('',#4605,#4606,#3758,.T.);
#5926=EDGE_CURVE('',#4606,#4577,#893,.T.);
#5927=EDGE_CURVE('',#4578,#4605,#894,.T.);
#5928=EDGE_CURVE('',#4492,#4606,#3484,.T.);
#5929=EDGE_CURVE('',#4605,#4491,#3485,.T.);
#5930=EDGE_CURVE('',#3921,#4598,#3759,.T.);
#5931=EDGE_CURVE('',#4607,#3920,#3760,.T.);
#5932=EDGE_CURVE('',#4607,#4599,#3486,.T.);
#5933=EDGE_CURVE('',#4600,#4493,#3761,.T.);
#5934=EDGE_CURVE('',#4608,#4607,#895,.T.);
#5935=EDGE_CURVE('',#4586,#4608,#3487,.T.);
#5936=EDGE_CURVE('',#4609,#4555,#3762,.T.);
#5937=EDGE_CURVE('',#4493,#4609,#3488,.F.);
#5938=EDGE_CURVE('',#4302,#4610,#3763,.T.);
#5939=EDGE_CURVE('',#4610,#4590,#896,.T.);
#5940=EDGE_CURVE('',#4604,#4611,#897,.T.);
#5941=EDGE_CURVE('',#4481,#4611,#3764,.T.);
#5942=EDGE_CURVE('',#4612,#4606,#898,.T.);
#5943=EDGE_CURVE('',#4613,#4612,#3489,.T.);
#5944=EDGE_CURVE('',#4611,#4613,#899,.T.);
#5945=EDGE_CURVE('',#4484,#4612,#3765,.T.);
#5946=EDGE_CURVE('',#4505,#4516,#900,.T.);
#5947=EDGE_CURVE('',#4519,#4501,#901,.T.);
#5948=EDGE_CURVE('',#4573,#4512,#902,.F.);
#5949=EDGE_CURVE('',#4482,#4613,#3766,.T.);
#5950=EDGE_CURVE('',#4601,#4614,#903,.T.);
#5951=EDGE_CURVE('',#4614,#4488,#3767,.T.);
#5952=EDGE_CURVE('',#4615,#4616,#3768,.T.);
#5953=EDGE_CURVE('',#4616,#4488,#185,.T.);
#5954=EDGE_CURVE('',#4614,#4615,#3490,.T.);
#5955=EDGE_CURVE('',#4616,#4302,#904,.T.);
#5956=EDGE_CURVE('',#4615,#4610,#905,.T.);
#5957=EDGE_CURVE('',#4617,#4585,#3769,.T.);
#5958=EDGE_CURVE('',#4576,#4617,#3491,.F.);
#5959=EDGE_CURVE('',#4618,#4619,#3492,.F.);
#5960=EDGE_CURVE('',#4620,#4618,#3770,.T.);
#5961=EDGE_CURVE('',#4620,#4621,#3493,.T.);
#5962=EDGE_CURVE('',#4619,#4621,#3771,.T.);
#5963=EDGE_CURVE('',#3922,#4608,#3772,.T.);
#5964=EDGE_CURVE('',#4587,#3923,#3773,.T.);
#5965=EDGE_CURVE('',#4622,#3919,#3494,.T.);
#5966=EDGE_CURVE('',#4623,#3918,#3495,.F.);
#5967=EDGE_CURVE('',#4622,#4623,#3774,.T.);
#5968=EDGE_CURVE('',#4609,#4623,#906,.T.);
#5969=EDGE_CURVE('',#4623,#4619,#907,.T.);
#5970=EDGE_CURVE('',#4621,#4622,#908,.T.);
#5971=EDGE_CURVE('',#3910,#4620,#909,.T.);
#5972=EDGE_CURVE('',#4618,#3911,#910,.T.);
#5973=EDGE_CURVE('',#3923,#4617,#911,.T.);
#5974=EDGE_CURVE('',#4542,#4609,#912,.T.);
#5975=EDGE_CURVE('',#4617,#4618,#913,.T.);
#5976=EDGE_CURVE('',#4619,#4576,#914,.T.);
#5977=EDGE_CURVE('',#4545,#4532,#915,.F.);
#5978=EDGE_CURVE('',#4521,#4526,#916,.T.);
#5979=EDGE_CURVE('',#4509,#4502,#917,.T.);
#5980=EDGE_CURVE('',#4491,#4486,#918,.T.);
#5981=EDGE_CURVE('',#4305,#4467,#919,.T.);
#5982=EDGE_CURVE('',#4300,#4616,#920,.T.);
#5983=EDGE_CURVE('',#4300,#4489,#3775,.T.);
#5984=EDGE_CURVE('',#4624,#4625,#921,.T.);
#5985=EDGE_CURVE('',#4624,#4626,#3776,.T.);
#5986=EDGE_CURVE('',#4626,#4627,#922,.T.);
#5987=EDGE_CURVE('',#4625,#4627,#3777,.T.);
#5988=EDGE_CURVE('',#4628,#4629,#923,.T.);
#5989=EDGE_CURVE('',#4628,#4624,#924,.T.);
#5990=EDGE_CURVE('',#4629,#4625,#925,.T.);
#5991=EDGE_CURVE('',#4630,#4631,#926,.T.);
#5992=EDGE_CURVE('',#4630,#4628,#3778,.T.);
#5993=EDGE_CURVE('',#4631,#4629,#3779,.T.);
#5994=EDGE_CURVE('',#4632,#4632,#3780,.T.);
#5995=EDGE_CURVE('',#4632,#4633,#927,.T.);
#5996=EDGE_CURVE('',#4634,#4633,#3781,.T.);
#5997=EDGE_CURVE('',#4633,#4634,#3782,.T.);
#5998=EDGE_CURVE('',#4635,#4636,#186,.T.);
#5999=EDGE_CURVE('',#4636,#4637,#187,.T.);
#6000=EDGE_CURVE('',#4637,#4116,#188,.T.);
#6001=EDGE_CURVE('',#4117,#4635,#3783,.T.);
#6002=EDGE_CURVE('',#4638,#4639,#189,.T.);
#6003=EDGE_CURVE('',#4637,#4639,#190,.T.);
#6004=EDGE_CURVE('',#4636,#4640,#191,.T.);
#6005=EDGE_CURVE('',#4640,#4641,#192,.T.);
#6006=EDGE_CURVE('',#4641,#4638,#193,.T.);
#6007=EDGE_CURVE('',#4639,#4635,#194,.T.);
#6008=EDGE_CURVE('',#4638,#4642,#195,.T.);
#6009=EDGE_CURVE('',#4642,#4640,#196,.T.);
#6010=EDGE_CURVE('',#4643,#4644,#928,.T.);
#6011=EDGE_CURVE('',#4644,#4645,#3784,.T.);
#6012=EDGE_CURVE('',#4645,#4646,#929,.T.);
#6013=EDGE_CURVE('',#4643,#4646,#3785,.T.);
#6014=EDGE_CURVE('',#4307,#4647,#930,.T.);
#6015=EDGE_CURVE('',#4129,#4647,#3786,.T.);
#6016=EDGE_CURVE('',#4648,#4649,#931,.T.);
#6017=EDGE_CURVE('',#4650,#4649,#932,.T.);
#6018=EDGE_CURVE('',#4650,#4651,#933,.T.);
#6019=EDGE_CURVE('',#4648,#4651,#934,.T.);
#6020=EDGE_CURVE('',#4649,#4652,#3787,.T.);
#6021=EDGE_CURVE('',#4653,#4648,#3788,.T.);
#6022=EDGE_CURVE('',#4652,#4653,#935,.T.);
#6023=EDGE_CURVE('',#4654,#4655,#197,.T.);
#6024=EDGE_CURVE('',#4655,#4656,#198,.T.);
#6025=EDGE_CURVE('',#4656,#4657,#199,.T.);
#6026=EDGE_CURVE('',#4657,#4658,#200,.T.);
#6027=EDGE_CURVE('',#4659,#4658,#201,.T.);
#6028=EDGE_CURVE('',#4654,#4659,#202,.T.);
#6029=EDGE_CURVE('',#4660,#4661,#3789,.T.);
#6030=EDGE_CURVE('',#4660,#4662,#3790,.T.);
#6031=EDGE_CURVE('',#4662,#4663,#3791,.T.);
#6032=EDGE_CURVE('',#4661,#4663,#3792,.T.);
#6033=EDGE_CURVE('',#4664,#4665,#3793,.T.);
#6034=EDGE_CURVE('',#4664,#4660,#936,.T.);
#6035=EDGE_CURVE('',#4665,#4661,#937,.T.);
#6036=EDGE_CURVE('',#4666,#4667,#3794,.T.);
#6037=EDGE_CURVE('',#4666,#4664,#3795,.T.);
#6038=EDGE_CURVE('',#4667,#4665,#3796,.T.);
#6039=EDGE_CURVE('',#4154,#4668,#3797,.T.);
#6040=EDGE_CURVE('',#4154,#4669,#938,.T.);
#6041=EDGE_CURVE('',#4669,#4666,#939,.T.);
#6042=EDGE_CURVE('',#4670,#4667,#940,.T.);
#6043=EDGE_CURVE('',#4668,#4670,#941,.T.);
#6044=EDGE_CURVE('',#4155,#4671,#3798,.T.);
#6045=EDGE_CURVE('',#4671,#4668,#942,.T.);
#6046=EDGE_CURVE('',#4652,#4672,#943,.T.);
#6047=EDGE_CURVE('',#4673,#4653,#944,.T.);
#6048=EDGE_CURVE('',#4673,#4672,#945,.T.);
#6049=EDGE_CURVE('',#4674,#4654,#203,.T.);
#6050=EDGE_CURVE('',#4658,#4674,#204,.T.);
#6051=EDGE_CURVE('',#4657,#4675,#205,.T.);
#6052=EDGE_CURVE('',#4675,#4655,#206,.T.);
#6053=EDGE_CURVE('',#4676,#4676,#3799,.T.);
#6054=EDGE_CURVE('',#4676,#4677,#946,.T.);
#6055=EDGE_CURVE('',#4678,#4677,#3800,.T.);
#6056=EDGE_CURVE('',#4677,#4678,#3801,.T.);
#6057=EDGE_CURVE('',#4679,#4679,#3802,.T.);
#6058=EDGE_CURVE('',#4679,#4676,#3803,.T.);
#6059=EDGE_CURVE('',#4680,#4681,#947,.T.);
#6060=EDGE_CURVE('',#4682,#4680,#3804,.T.);
#6061=EDGE_CURVE('',#4683,#4682,#948,.T.);
#6062=EDGE_CURVE('',#4644,#4683,#3805,.T.);
#6063=EDGE_CURVE('',#4684,#4643,#3806,.T.);
#6064=EDGE_CURVE('',#4685,#4684,#949,.T.);
#6065=EDGE_CURVE('',#4681,#4685,#3807,.T.);
#6066=EDGE_CURVE('',#4686,#4686,#3808,.T.);
#6067=EDGE_CURVE('',#4686,#4632,#3809,.T.);
#6068=EDGE_CURVE('',#4135,#4687,#950,.T.);
#6069=EDGE_CURVE('',#4478,#4687,#3810,.T.);
#6070=EDGE_CURVE('',#4142,#4145,#951,.T.);
#6071=EDGE_CURVE('',#4299,#4688,#3811,.T.);
#6072=EDGE_CURVE('',#4688,#4489,#3812,.T.);
#6073=EDGE_CURVE('',#4689,#4690,#952,.T.);
#6074=EDGE_CURVE('',#4672,#4689,#3813,.T.);
#6075=EDGE_CURVE('',#4690,#4673,#3814,.T.);
#6076=EDGE_CURVE('',#4691,#4692,#953,.T.);
#6077=EDGE_CURVE('',#4689,#4692,#954,.T.);
#6078=EDGE_CURVE('',#4691,#4690,#955,.T.);
#6079=EDGE_CURVE('',#4692,#4645,#3815,.T.);
#6080=EDGE_CURVE('',#4693,#4691,#3816,.T.);
#6081=EDGE_CURVE('',#4645,#4693,#956,.T.);
#6082=EDGE_CURVE('',#4694,#4693,#957,.T.);
#6083=EDGE_CURVE('',#4694,#4646,#958,.T.);
#6084=EDGE_CURVE('',#4112,#4687,#3817,.T.);
#6085=EDGE_CURVE('',#4695,#4113,#3818,.T.);
#6086=EDGE_CURVE('',#4687,#4695,#959,.T.);
#6087=EDGE_CURVE('',#4696,#4662,#960,.T.);
#6088=EDGE_CURVE('',#4697,#4696,#3819,.T.);
#6089=EDGE_CURVE('',#4698,#4697,#961,.T.);
#6090=EDGE_CURVE('',#4699,#4698,#3820,.T.);
#6091=EDGE_CURVE('',#4700,#4699,#962,.T.);
#6092=EDGE_CURVE('',#4701,#4700,#3821,.T.);
#6093=EDGE_CURVE('',#4663,#4701,#963,.T.);
#6094=EDGE_CURVE('',#4315,#4702,#3822,.T.);
#6095=EDGE_CURVE('',#4702,#4703,#964,.T.);
#6096=EDGE_CURVE('',#4703,#4630,#3823,.T.);
#6097=EDGE_CURVE('',#4631,#4704,#3824,.T.);
#6098=EDGE_CURVE('',#4704,#4705,#965,.T.);
#6099=EDGE_CURVE('',#4705,#4314,#3825,.T.);
#6100=EDGE_CURVE('',#4638,#4706,#966,.T.);
#6101=EDGE_CURVE('',#4707,#4706,#207,.F.);
#6102=EDGE_CURVE('',#4640,#4707,#967,.T.);
#6103=EDGE_CURVE('',#4708,#4708,#3826,.T.);
#6104=EDGE_CURVE('',#4708,#4634,#3827,.T.);
#6105=EDGE_CURVE('',#4709,#4709,#3828,.T.);
#6106=EDGE_CURVE('',#4709,#4710,#968,.T.);
#6107=EDGE_CURVE('',#4710,#4710,#3829,.T.);
#6108=EDGE_CURVE('',#4706,#4707,#208,.T.);
#6109=EDGE_CURVE('',#4158,#4711,#969,.T.);
#6110=EDGE_CURVE('',#4711,#4669,#970,.T.);
#6111=EDGE_CURVE('',#4711,#4712,#971,.T.);
#6112=EDGE_CURVE('',#4712,#4666,#972,.T.);
#6113=EDGE_CURVE('',#4712,#4713,#3830,.T.);
#6114=EDGE_CURVE('',#4713,#4664,#973,.T.);
#6115=EDGE_CURVE('',#4713,#4714,#974,.T.);
#6116=EDGE_CURVE('',#4714,#4660,#975,.T.);
#6117=EDGE_CURVE('',#4714,#4696,#3831,.T.);
#6118=EDGE_CURVE('',#4310,#4673,#976,.T.);
#6119=EDGE_CURVE('',#4311,#4653,#977,.T.);
#6120=EDGE_CURVE('',#4715,#4306,#978,.T.);
#6121=EDGE_CURVE('',#4647,#4715,#979,.T.);
#6122=EDGE_CURVE('',#4715,#4467,#3832,.T.);
#6123=EDGE_CURVE('',#4672,#4680,#3833,.T.);
#6124=EDGE_CURVE('',#4681,#4652,#3834,.T.);
#6125=EDGE_CURVE('',#4626,#4694,#980,.T.);
#6126=EDGE_CURVE('',#4627,#4693,#981,.T.);
#6127=EDGE_CURVE('',#4716,#4717,#982,.T.);
#6128=EDGE_CURVE('',#4716,#4700,#3835,.T.);
#6129=EDGE_CURVE('',#4717,#4699,#3836,.T.);
#6130=EDGE_CURVE('',#4718,#4719,#983,.T.);
#6131=EDGE_CURVE('',#4718,#4716,#984,.T.);
#6132=EDGE_CURVE('',#4719,#4717,#985,.T.);
#6133=EDGE_CURVE('',#4720,#4721,#986,.T.);
#6134=EDGE_CURVE('',#4720,#4718,#3837,.T.);
#6135=EDGE_CURVE('',#4721,#4719,#3838,.T.);
#6136=EDGE_CURVE('',#4722,#4723,#987,.T.);
#6137=EDGE_CURVE('',#4722,#4720,#988,.T.);
#6138=EDGE_CURVE('',#4723,#4721,#989,.T.);
#6139=EDGE_CURVE('',#4490,#4722,#990,.T.);
#6140=EDGE_CURVE('',#4485,#4723,#991,.T.);
#6141=EDGE_CURVE('',#4724,#4725,#209,.T.);
#6142=EDGE_CURVE('',#4655,#4724,#992,.T.);
#6143=EDGE_CURVE('',#4657,#4725,#993,.T.);
#6144=EDGE_CURVE('',#4725,#4724,#210,.T.);
#6145=EDGE_CURVE('',#4726,#4726,#3839,.T.);
#6146=EDGE_CURVE('',#4727,#4727,#3840,.T.);
#6147=EDGE_CURVE('',#4727,#4726,#994,.T.);
#6148=EDGE_CURVE('',#4728,#4728,#3841,.T.);
#6149=EDGE_CURVE('',#4728,#4678,#3842,.T.);
#6150=EDGE_CURVE('',#4729,#4150,#3843,.T.);
#6151=EDGE_CURVE('',#4729,#4730,#995,.T.);
#6152=EDGE_CURVE('',#4730,#4158,#3844,.T.);
#6153=EDGE_CURVE('',#4145,#4729,#3845,.T.);
#6154=EDGE_CURVE('',#4731,#4690,#996,.T.);
#6155=EDGE_CURVE('',#4731,#4310,#3846,.T.);
#6156=EDGE_CURVE('',#4732,#4731,#3847,.T.);
#6157=EDGE_CURVE('',#4732,#4308,#3848,.T.);
#6158=EDGE_CURVE('',#4733,#4732,#997,.T.);
#6159=EDGE_CURVE('',#4733,#4312,#3849,.T.);
#6160=EDGE_CURVE('',#4705,#4733,#3850,.T.);
#6161=EDGE_CURVE('',#4734,#4697,#3851,.T.);
#6162=EDGE_CURVE('',#4734,#4714,#3852,.T.);
#6163=EDGE_CURVE('',#4735,#4734,#998,.T.);
#6164=EDGE_CURVE('',#4735,#4713,#3853,.T.);
#6165=EDGE_CURVE('',#4736,#4735,#3854,.T.);
#6166=EDGE_CURVE('',#4736,#4712,#3855,.T.);
#6167=EDGE_CURVE('',#4730,#4737,#999,.T.);
#6168=EDGE_CURVE('',#4737,#4736,#1000,.T.);
#6169=EDGE_CURVE('',#4738,#4729,#1001,.T.);
#6170=EDGE_CURVE('',#4738,#4739,#1002,.T.);
#6171=EDGE_CURVE('',#4739,#4730,#1003,.T.);
#6172=EDGE_CURVE('',#4142,#4738,#3856,.T.);
#6173=EDGE_CURVE('',#4740,#4691,#1004,.T.);
#6174=EDGE_CURVE('',#4740,#4731,#1005,.T.);
#6175=EDGE_CURVE('',#4741,#4740,#3857,.T.);
#6176=EDGE_CURVE('',#4741,#4732,#1006,.T.);
#6177=EDGE_CURVE('',#4742,#4741,#1007,.T.);
#6178=EDGE_CURVE('',#4742,#4733,#1008,.T.);
#6179=EDGE_CURVE('',#4704,#4742,#3858,.T.);
#6180=EDGE_CURVE('',#4743,#4698,#3859,.T.);
#6181=EDGE_CURVE('',#4743,#4734,#1009,.T.);
#6182=EDGE_CURVE('',#4744,#4743,#1010,.T.);
#6183=EDGE_CURVE('',#4744,#4735,#1011,.T.);
#6184=EDGE_CURVE('',#4745,#4744,#3860,.T.);
#6185=EDGE_CURVE('',#4745,#4736,#1012,.T.);
#6186=EDGE_CURVE('',#4746,#4745,#1013,.T.);
#6187=EDGE_CURVE('',#4746,#4737,#1014,.T.);
#6188=EDGE_CURVE('',#4739,#4746,#1015,.T.);
#6189=EDGE_CURVE('',#4485,#4739,#3861,.T.);
#6190=EDGE_CURVE('',#4483,#4738,#3862,.T.);
#6191=EDGE_CURVE('',#4627,#4740,#3863,.T.);
#6192=EDGE_CURVE('',#4625,#4741,#3864,.T.);
#6193=EDGE_CURVE('',#4629,#4742,#3865,.T.);
#6194=EDGE_CURVE('',#4717,#4743,#3866,.T.);
#6195=EDGE_CURVE('',#4719,#4744,#3867,.T.);
#6196=EDGE_CURVE('',#4721,#4745,#3868,.T.);
#6197=EDGE_CURVE('',#4747,#4490,#3869,.T.);
#6198=EDGE_CURVE('',#4688,#4747,#1016,.T.);
#6199=EDGE_CURVE('',#4748,#4651,#1017,.T.);
#6200=EDGE_CURVE('',#4651,#4694,#3870,.T.);
#6201=EDGE_CURVE('',#4748,#4626,#3871,.T.);
#6202=EDGE_CURVE('',#4749,#4748,#3872,.T.);
#6203=EDGE_CURVE('',#4749,#4624,#3873,.T.);
#6204=EDGE_CURVE('',#4750,#4749,#1018,.T.);
#6205=EDGE_CURVE('',#4750,#4628,#3874,.T.);
#6206=EDGE_CURVE('',#4703,#4750,#3875,.T.);
#6207=EDGE_CURVE('',#4751,#4716,#3876,.T.);
#6208=EDGE_CURVE('',#4751,#4701,#3877,.T.);
#6209=EDGE_CURVE('',#4752,#4718,#3878,.T.);
#6210=EDGE_CURVE('',#4752,#4751,#1019,.T.);
#6211=EDGE_CURVE('',#4753,#4720,#3879,.T.);
#6212=EDGE_CURVE('',#4753,#4752,#3880,.T.);
#6213=EDGE_CURVE('',#4747,#4754,#1020,.T.);
#6214=EDGE_CURVE('',#4754,#4753,#1021,.T.);
#6215=EDGE_CURVE('',#4668,#4747,#1022,.T.);
#6216=EDGE_CURVE('',#4671,#4688,#1023,.T.);
#6217=EDGE_CURVE('',#4296,#4299,#1024,.T.);
#6218=EDGE_CURVE('',#4296,#4671,#3881,.T.);
#6219=EDGE_CURVE('',#4755,#4648,#1025,.T.);
#6220=EDGE_CURVE('',#4755,#4748,#1026,.T.);
#6221=EDGE_CURVE('',#4756,#4755,#3882,.T.);
#6222=EDGE_CURVE('',#4756,#4749,#1027,.T.);
#6223=EDGE_CURVE('',#4757,#4756,#1028,.T.);
#6224=EDGE_CURVE('',#4757,#4750,#1029,.T.);
#6225=EDGE_CURVE('',#4702,#4757,#3883,.T.);
#6226=EDGE_CURVE('',#4661,#4751,#1030,.T.);
#6227=EDGE_CURVE('',#4665,#4752,#1031,.T.);
#6228=EDGE_CURVE('',#4667,#4753,#1032,.T.);
#6229=EDGE_CURVE('',#4670,#4754,#1033,.T.);
#6230=EDGE_CURVE('',#4311,#4755,#3884,.T.);
#6231=EDGE_CURVE('',#4309,#4756,#3885,.T.);
#6232=EDGE_CURVE('',#4313,#4757,#3886,.T.);
#6233=EDGE_CURVE('',#4646,#4650,#3887,.T.);
#6234=EDGE_CURVE('',#4115,#4674,#3888,.T.);
#6235=EDGE_CURVE('',#4659,#4114,#211,.T.);
#6236=EDGE_CURVE('',#4715,#4109,#3889,.T.);
#6237=EDGE_CURVE('',#4695,#4134,#1034,.T.);
#6238=EDGE_CURVE('',#4695,#4118,#3890,.T.);
#6239=EDGE_CURVE('',#4647,#4108,#3891,.T.);
#6240=EDGE_CURVE('',#4685,#4649,#3892,.T.);
#6241=EDGE_CURVE('',#4684,#4650,#3893,.T.);
#6242=EDGE_CURVE('',#4683,#4692,#3894,.T.);
#6243=EDGE_CURVE('',#4682,#4689,#3895,.T.);
#6244=ORIENTED_EDGE('',*,*,#4758,.T.);
#6245=ORIENTED_EDGE('',*,*,#4759,.T.);
#6246=ORIENTED_EDGE('',*,*,#4760,.T.);
#6247=ORIENTED_EDGE('',*,*,#4761,.T.);
#6248=ORIENTED_EDGE('',*,*,#4762,.T.);
#6249=ORIENTED_EDGE('',*,*,#4763,.T.);
#6250=ORIENTED_EDGE('',*,*,#4760,.F.);
#6251=ORIENTED_EDGE('',*,*,#4764,.T.);
#6252=ORIENTED_EDGE('',*,*,#4765,.T.);
#6253=ORIENTED_EDGE('',*,*,#4766,.T.);
#6254=ORIENTED_EDGE('',*,*,#4762,.F.);
#6255=ORIENTED_EDGE('',*,*,#4767,.T.);
#6256=ORIENTED_EDGE('',*,*,#4765,.F.);
#6257=ORIENTED_EDGE('',*,*,#4768,.T.);
#6258=ORIENTED_EDGE('',*,*,#4769,.T.);
#6259=ORIENTED_EDGE('',*,*,#4770,.T.);
#6260=ORIENTED_EDGE('',*,*,#4767,.F.);
#6261=ORIENTED_EDGE('',*,*,#4771,.T.);
#6262=ORIENTED_EDGE('',*,*,#4772,.T.);
#6263=ORIENTED_EDGE('',*,*,#4773,.F.);
#6264=ORIENTED_EDGE('',*,*,#4764,.F.);
#6265=ORIENTED_EDGE('',*,*,#4774,.F.);
#6266=ORIENTED_EDGE('',*,*,#4775,.F.);
#6267=ORIENTED_EDGE('',*,*,#4771,.F.);
#6268=ORIENTED_EDGE('',*,*,#4759,.F.);
#6269=ORIENTED_EDGE('',*,*,#4776,.T.);
#6270=ORIENTED_EDGE('',*,*,#4777,.T.);
#6271=ORIENTED_EDGE('',*,*,#4774,.T.);
#6272=ORIENTED_EDGE('',*,*,#4778,.T.);
#6273=ORIENTED_EDGE('',*,*,#4779,.T.);
#6274=ORIENTED_EDGE('',*,*,#4780,.T.);
#6275=ORIENTED_EDGE('',*,*,#4781,.T.);
#6276=ORIENTED_EDGE('',*,*,#4782,.T.);
#6277=ORIENTED_EDGE('',*,*,#4783,.T.);
#6278=ORIENTED_EDGE('',*,*,#4780,.F.);
#6279=ORIENTED_EDGE('',*,*,#4784,.T.);
#6280=ORIENTED_EDGE('',*,*,#4785,.T.);
#6281=ORIENTED_EDGE('',*,*,#4786,.T.);
#6282=ORIENTED_EDGE('',*,*,#4782,.F.);
#6283=ORIENTED_EDGE('',*,*,#4787,.T.);
#6284=ORIENTED_EDGE('',*,*,#4785,.F.);
#6285=ORIENTED_EDGE('',*,*,#4788,.T.);
#6286=ORIENTED_EDGE('',*,*,#4789,.T.);
#6287=ORIENTED_EDGE('',*,*,#4790,.T.);
#6288=ORIENTED_EDGE('',*,*,#4787,.F.);
#6289=ORIENTED_EDGE('',*,*,#4791,.T.);
#6290=ORIENTED_EDGE('',*,*,#4792,.T.);
#6291=ORIENTED_EDGE('',*,*,#4793,.T.);
#6292=ORIENTED_EDGE('',*,*,#4784,.F.);
#6293=ORIENTED_EDGE('',*,*,#4794,.F.);
#6294=ORIENTED_EDGE('',*,*,#4795,.F.);
#6295=ORIENTED_EDGE('',*,*,#4791,.F.);
#6296=ORIENTED_EDGE('',*,*,#4779,.F.);
#6297=ORIENTED_EDGE('',*,*,#4796,.T.);
#6298=ORIENTED_EDGE('',*,*,#4797,.T.);
#6299=ORIENTED_EDGE('',*,*,#4794,.T.);
#6300=ORIENTED_EDGE('',*,*,#4798,.T.);
#6301=ORIENTED_EDGE('',*,*,#4799,.T.);
#6302=ORIENTED_EDGE('',*,*,#4800,.T.);
#6303=ORIENTED_EDGE('',*,*,#4801,.T.);
#6304=ORIENTED_EDGE('',*,*,#4802,.T.);
#6305=ORIENTED_EDGE('',*,*,#4803,.T.);
#6306=ORIENTED_EDGE('',*,*,#4800,.F.);
#6307=ORIENTED_EDGE('',*,*,#4804,.T.);
#6308=ORIENTED_EDGE('',*,*,#4805,.T.);
#6309=ORIENTED_EDGE('',*,*,#4806,.T.);
#6310=ORIENTED_EDGE('',*,*,#4802,.F.);
#6311=ORIENTED_EDGE('',*,*,#4807,.T.);
#6312=ORIENTED_EDGE('',*,*,#4805,.F.);
#6313=ORIENTED_EDGE('',*,*,#4808,.T.);
#6314=ORIENTED_EDGE('',*,*,#4809,.T.);
#6315=ORIENTED_EDGE('',*,*,#4810,.T.);
#6316=ORIENTED_EDGE('',*,*,#4807,.F.);
#6317=ORIENTED_EDGE('',*,*,#4811,.T.);
#6318=ORIENTED_EDGE('',*,*,#4812,.T.);
#6319=ORIENTED_EDGE('',*,*,#4813,.T.);
#6320=ORIENTED_EDGE('',*,*,#4804,.F.);
#6321=ORIENTED_EDGE('',*,*,#4814,.F.);
#6322=ORIENTED_EDGE('',*,*,#4815,.F.);
#6323=ORIENTED_EDGE('',*,*,#4811,.F.);
#6324=ORIENTED_EDGE('',*,*,#4799,.F.);
#6325=ORIENTED_EDGE('',*,*,#4816,.T.);
#6326=ORIENTED_EDGE('',*,*,#4817,.T.);
#6327=ORIENTED_EDGE('',*,*,#4814,.T.);
#6328=ORIENTED_EDGE('',*,*,#4818,.T.);
#6329=ORIENTED_EDGE('',*,*,#4819,.T.);
#6330=ORIENTED_EDGE('',*,*,#4820,.T.);
#6331=ORIENTED_EDGE('',*,*,#4821,.T.);
#6332=ORIENTED_EDGE('',*,*,#4822,.T.);
#6333=ORIENTED_EDGE('',*,*,#4823,.T.);
#6334=ORIENTED_EDGE('',*,*,#4820,.F.);
#6335=ORIENTED_EDGE('',*,*,#4824,.T.);
#6336=ORIENTED_EDGE('',*,*,#4825,.T.);
#6337=ORIENTED_EDGE('',*,*,#4826,.T.);
#6338=ORIENTED_EDGE('',*,*,#4822,.F.);
#6339=ORIENTED_EDGE('',*,*,#4827,.T.);
#6340=ORIENTED_EDGE('',*,*,#4825,.F.);
#6341=ORIENTED_EDGE('',*,*,#4828,.T.);
#6342=ORIENTED_EDGE('',*,*,#4829,.T.);
#6343=ORIENTED_EDGE('',*,*,#4830,.T.);
#6344=ORIENTED_EDGE('',*,*,#4827,.F.);
#6345=ORIENTED_EDGE('',*,*,#4831,.T.);
#6346=ORIENTED_EDGE('',*,*,#4832,.T.);
#6347=ORIENTED_EDGE('',*,*,#4833,.F.);
#6348=ORIENTED_EDGE('',*,*,#4824,.F.);
#6349=ORIENTED_EDGE('',*,*,#4834,.F.);
#6350=ORIENTED_EDGE('',*,*,#4835,.F.);
#6351=ORIENTED_EDGE('',*,*,#4831,.F.);
#6352=ORIENTED_EDGE('',*,*,#4819,.F.);
#6353=ORIENTED_EDGE('',*,*,#4836,.T.);
#6354=ORIENTED_EDGE('',*,*,#4837,.T.);
#6355=ORIENTED_EDGE('',*,*,#4834,.T.);
#6356=ORIENTED_EDGE('',*,*,#4808,.F.);
#6357=ORIENTED_EDGE('',*,*,#4813,.F.);
#6358=ORIENTED_EDGE('',*,*,#4838,.F.);
#6359=ORIENTED_EDGE('',*,*,#4839,.F.);
#6360=ORIENTED_EDGE('',*,*,#4840,.T.);
#6361=ORIENTED_EDGE('',*,*,#4841,.T.);
#6362=ORIENTED_EDGE('',*,*,#4842,.T.);
#6363=ORIENTED_EDGE('',*,*,#4843,.T.);
#6364=ORIENTED_EDGE('',*,*,#4844,.T.);
#6365=ORIENTED_EDGE('',*,*,#4845,.T.);
#6366=ORIENTED_EDGE('',*,*,#4846,.T.);
#6367=ORIENTED_EDGE('',*,*,#4843,.F.);
#6368=ORIENTED_EDGE('',*,*,#4847,.T.);
#6369=ORIENTED_EDGE('',*,*,#4848,.T.);
#6370=ORIENTED_EDGE('',*,*,#4849,.T.);
#6371=ORIENTED_EDGE('',*,*,#4850,.T.);
#6372=ORIENTED_EDGE('',*,*,#4851,.T.);
#6373=ORIENTED_EDGE('',*,*,#4852,.T.);
#6374=ORIENTED_EDGE('',*,*,#4847,.F.);
#6375=ORIENTED_EDGE('',*,*,#4853,.T.);
#6376=ORIENTED_EDGE('',*,*,#4854,.T.);
#6377=ORIENTED_EDGE('',*,*,#4851,.F.);
#6378=ORIENTED_EDGE('',*,*,#4855,.T.);
#6379=ORIENTED_EDGE('',*,*,#4845,.F.);
#6380=ORIENTED_EDGE('',*,*,#4856,.T.);
#6381=ORIENTED_EDGE('',*,*,#4857,.T.);
#6382=ORIENTED_EDGE('',*,*,#4841,.F.);
#6383=ORIENTED_EDGE('',*,*,#4858,.T.);
#6384=ORIENTED_EDGE('',*,*,#4859,.T.);
#6385=ORIENTED_EDGE('',*,*,#4860,.T.);
#6386=ORIENTED_EDGE('',*,*,#4856,.F.);
#6387=ORIENTED_EDGE('',*,*,#4861,.T.);
#6388=ORIENTED_EDGE('',*,*,#4861,.F.);
#6389=ORIENTED_EDGE('',*,*,#4858,.F.);
#6390=ORIENTED_EDGE('',*,*,#4840,.F.);
#6391=ORIENTED_EDGE('',*,*,#4862,.F.);
#6392=ORIENTED_EDGE('',*,*,#4863,.T.);
#6393=ORIENTED_EDGE('',*,*,#4864,.T.);
#6394=ORIENTED_EDGE('',*,*,#4846,.F.);
#6395=ORIENTED_EDGE('',*,*,#4865,.T.);
#6396=ORIENTED_EDGE('',*,*,#4866,.T.);
#6397=ORIENTED_EDGE('',*,*,#4862,.T.);
#6398=ORIENTED_EDGE('',*,*,#4855,.F.);
#6399=ORIENTED_EDGE('',*,*,#4853,.F.);
#6400=ORIENTED_EDGE('',*,*,#4850,.F.);
#6401=ORIENTED_EDGE('',*,*,#4867,.T.);
#6402=ORIENTED_EDGE('',*,*,#4868,.F.);
#6403=ORIENTED_EDGE('',*,*,#4865,.F.);
#6404=ORIENTED_EDGE('',*,*,#4869,.T.);
#6405=ORIENTED_EDGE('',*,*,#4870,.T.);
#6406=ORIENTED_EDGE('',*,*,#4871,.T.);
#6407=ORIENTED_EDGE('',*,*,#4872,.T.);
#6408=ORIENTED_EDGE('',*,*,#4873,.T.);
#6409=ORIENTED_EDGE('',*,*,#4874,.T.);
#6410=ORIENTED_EDGE('',*,*,#4870,.F.);
#6411=ORIENTED_EDGE('',*,*,#4875,.T.);
#6412=ORIENTED_EDGE('',*,*,#4876,.T.);
#6413=ORIENTED_EDGE('',*,*,#4877,.T.);
#6414=ORIENTED_EDGE('',*,*,#4873,.F.);
#6415=ORIENTED_EDGE('',*,*,#4878,.T.);
#6416=ORIENTED_EDGE('',*,*,#4879,.T.);
#6417=ORIENTED_EDGE('',*,*,#4872,.F.);
#6418=ORIENTED_EDGE('',*,*,#4880,.T.);
#6419=ORIENTED_EDGE('',*,*,#4881,.T.);
#6420=ORIENTED_EDGE('',*,*,#4882,.T.);
#6421=ORIENTED_EDGE('',*,*,#4883,.T.);
#6422=ORIENTED_EDGE('',*,*,#4884,.T.);
#6423=ORIENTED_EDGE('',*,*,#4885,.T.);
#6424=ORIENTED_EDGE('',*,*,#4886,.T.);
#6425=ORIENTED_EDGE('',*,*,#4887,.T.);
#6426=ORIENTED_EDGE('',*,*,#4882,.F.);
#6427=ORIENTED_EDGE('',*,*,#4888,.T.);
#6428=ORIENTED_EDGE('',*,*,#4889,.T.);
#6429=ORIENTED_EDGE('',*,*,#4886,.F.);
#6430=ORIENTED_EDGE('',*,*,#4890,.T.);
#6431=ORIENTED_EDGE('',*,*,#4881,.F.);
#6432=ORIENTED_EDGE('',*,*,#4878,.F.);
#6433=ORIENTED_EDGE('',*,*,#4875,.F.);
#6434=ORIENTED_EDGE('',*,*,#4869,.F.);
#6435=ORIENTED_EDGE('',*,*,#4891,.F.);
#6436=ORIENTED_EDGE('',*,*,#4892,.T.);
#6437=ORIENTED_EDGE('',*,*,#4893,.T.);
#6438=ORIENTED_EDGE('',*,*,#4879,.F.);
#6439=ORIENTED_EDGE('',*,*,#4894,.T.);
#6440=ORIENTED_EDGE('',*,*,#4895,.T.);
#6441=ORIENTED_EDGE('',*,*,#4891,.T.);
#6442=ORIENTED_EDGE('',*,*,#4890,.F.);
#6443=ORIENTED_EDGE('',*,*,#4888,.F.);
#6444=ORIENTED_EDGE('',*,*,#4885,.F.);
#6445=ORIENTED_EDGE('',*,*,#4896,.T.);
#6446=ORIENTED_EDGE('',*,*,#4897,.F.);
#6447=ORIENTED_EDGE('',*,*,#4894,.F.);
#6448=ORIENTED_EDGE('',*,*,#4898,.T.);
#6449=ORIENTED_EDGE('',*,*,#4899,.T.);
#6450=ORIENTED_EDGE('',*,*,#4900,.T.);
#6451=ORIENTED_EDGE('',*,*,#4901,.T.);
#6452=ORIENTED_EDGE('',*,*,#4902,.T.);
#6453=ORIENTED_EDGE('',*,*,#4903,.T.);
#6454=ORIENTED_EDGE('',*,*,#4899,.F.);
#6455=ORIENTED_EDGE('',*,*,#4904,.T.);
#6456=ORIENTED_EDGE('',*,*,#4905,.T.);
#6457=ORIENTED_EDGE('',*,*,#4901,.F.);
#6458=ORIENTED_EDGE('',*,*,#4906,.T.);
#6459=ORIENTED_EDGE('',*,*,#4907,.T.);
#6460=ORIENTED_EDGE('',*,*,#4908,.T.);
#6461=ORIENTED_EDGE('',*,*,#4909,.T.);
#6462=ORIENTED_EDGE('',*,*,#4910,.T.);
#6463=ORIENTED_EDGE('',*,*,#4907,.F.);
#6464=ORIENTED_EDGE('',*,*,#4911,.T.);
#6465=ORIENTED_EDGE('',*,*,#4912,.T.);
#6466=ORIENTED_EDGE('',*,*,#4909,.F.);
#6467=ORIENTED_EDGE('',*,*,#4913,.T.);
#6468=ORIENTED_EDGE('',*,*,#4914,.T.);
#6469=ORIENTED_EDGE('',*,*,#4915,.T.);
#6470=ORIENTED_EDGE('',*,*,#4916,.T.);
#6471=ORIENTED_EDGE('',*,*,#4902,.F.);
#6472=ORIENTED_EDGE('',*,*,#4917,.T.);
#6473=ORIENTED_EDGE('',*,*,#4918,.T.);
#6474=ORIENTED_EDGE('',*,*,#4915,.F.);
#6475=ORIENTED_EDGE('',*,*,#4919,.T.);
#6476=ORIENTED_EDGE('',*,*,#4911,.F.);
#6477=ORIENTED_EDGE('',*,*,#4920,.T.);
#6478=ORIENTED_EDGE('',*,*,#4921,.T.);
#6479=ORIENTED_EDGE('',*,*,#4922,.T.);
#6480=ORIENTED_EDGE('',*,*,#4921,.F.);
#6481=ORIENTED_EDGE('',*,*,#4923,.T.);
#6482=ORIENTED_EDGE('',*,*,#4903,.F.);
#6483=ORIENTED_EDGE('',*,*,#4916,.F.);
#6484=ORIENTED_EDGE('',*,*,#4924,.T.);
#6485=ORIENTED_EDGE('',*,*,#4925,.F.);
#6486=ORIENTED_EDGE('',*,*,#4926,.F.);
#6487=ORIENTED_EDGE('',*,*,#4927,.T.);
#6488=ORIENTED_EDGE('',*,*,#4918,.F.);
#6489=ORIENTED_EDGE('',*,*,#4928,.F.);
#6490=ORIENTED_EDGE('',*,*,#4923,.F.);
#6491=ORIENTED_EDGE('',*,*,#4929,.F.);
#6492=ORIENTED_EDGE('',*,*,#4930,.F.);
#6493=ORIENTED_EDGE('',*,*,#4931,.F.);
#6494=ORIENTED_EDGE('',*,*,#4932,.F.);
#6495=ORIENTED_EDGE('',*,*,#4933,.F.);
#6496=ORIENTED_EDGE('',*,*,#4934,.F.);
#6497=ORIENTED_EDGE('',*,*,#4935,.F.);
#6498=ORIENTED_EDGE('',*,*,#4936,.F.);
#6499=ORIENTED_EDGE('',*,*,#4937,.F.);
#6500=ORIENTED_EDGE('',*,*,#4938,.F.);
#6501=ORIENTED_EDGE('',*,*,#4924,.F.);
#6502=ORIENTED_EDGE('',*,*,#4939,.F.);
#6503=ORIENTED_EDGE('',*,*,#4892,.F.);
#6504=ORIENTED_EDGE('',*,*,#4940,.T.);
#6505=ORIENTED_EDGE('',*,*,#4904,.F.);
#6506=ORIENTED_EDGE('',*,*,#4898,.F.);
#6507=ORIENTED_EDGE('',*,*,#4905,.F.);
#6508=ORIENTED_EDGE('',*,*,#4941,.T.);
#6509=ORIENTED_EDGE('',*,*,#4942,.T.);
#6510=ORIENTED_EDGE('',*,*,#4939,.T.);
#6511=ORIENTED_EDGE('',*,*,#4943,.T.);
#6512=ORIENTED_EDGE('',*,*,#4944,.T.);
#6513=ORIENTED_EDGE('',*,*,#4945,.T.);
#6514=ORIENTED_EDGE('',*,*,#4946,.T.);
#6515=ORIENTED_EDGE('',*,*,#4947,.T.);
#6516=ORIENTED_EDGE('',*,*,#4948,.T.);
#6517=ORIENTED_EDGE('',*,*,#4944,.F.);
#6518=ORIENTED_EDGE('',*,*,#4949,.T.);
#6519=ORIENTED_EDGE('',*,*,#4950,.T.);
#6520=ORIENTED_EDGE('',*,*,#4946,.F.);
#6521=ORIENTED_EDGE('',*,*,#4951,.T.);
#6522=ORIENTED_EDGE('',*,*,#4952,.T.);
#6523=ORIENTED_EDGE('',*,*,#4953,.T.);
#6524=ORIENTED_EDGE('',*,*,#4954,.T.);
#6525=ORIENTED_EDGE('',*,*,#4955,.T.);
#6526=ORIENTED_EDGE('',*,*,#4952,.F.);
#6527=ORIENTED_EDGE('',*,*,#4956,.T.);
#6528=ORIENTED_EDGE('',*,*,#4957,.T.);
#6529=ORIENTED_EDGE('',*,*,#4954,.F.);
#6530=ORIENTED_EDGE('',*,*,#4926,.T.);
#6531=ORIENTED_EDGE('',*,*,#4958,.T.);
#6532=ORIENTED_EDGE('',*,*,#4959,.T.);
#6533=ORIENTED_EDGE('',*,*,#4960,.T.);
#6534=ORIENTED_EDGE('',*,*,#4947,.F.);
#6535=ORIENTED_EDGE('',*,*,#4961,.T.);
#6536=ORIENTED_EDGE('',*,*,#4936,.T.);
#6537=ORIENTED_EDGE('',*,*,#4959,.F.);
#6538=ORIENTED_EDGE('',*,*,#4962,.T.);
#6539=ORIENTED_EDGE('',*,*,#4956,.F.);
#6540=ORIENTED_EDGE('',*,*,#4925,.T.);
#6541=ORIENTED_EDGE('',*,*,#4963,.T.);
#6542=ORIENTED_EDGE('',*,*,#4964,.T.);
#6543=ORIENTED_EDGE('',*,*,#4963,.F.);
#6544=ORIENTED_EDGE('',*,*,#4938,.T.);
#6545=ORIENTED_EDGE('',*,*,#4948,.F.);
#6546=ORIENTED_EDGE('',*,*,#4960,.F.);
#6547=ORIENTED_EDGE('',*,*,#4935,.T.);
#6548=ORIENTED_EDGE('',*,*,#4965,.T.);
#6549=ORIENTED_EDGE('',*,*,#4966,.T.);
#6550=ORIENTED_EDGE('',*,*,#4967,.F.);
#6551=ORIENTED_EDGE('',*,*,#4863,.F.);
#6552=ORIENTED_EDGE('',*,*,#4968,.T.);
#6553=ORIENTED_EDGE('',*,*,#4949,.F.);
#6554=ORIENTED_EDGE('',*,*,#4943,.F.);
#6555=ORIENTED_EDGE('',*,*,#4950,.F.);
#6556=ORIENTED_EDGE('',*,*,#4969,.T.);
#6557=ORIENTED_EDGE('',*,*,#4970,.T.);
#6558=ORIENTED_EDGE('',*,*,#4967,.T.);
#6559=ORIENTED_EDGE('',*,*,#4971,.F.);
#6560=ORIENTED_EDGE('',*,*,#4972,.F.);
#6561=ORIENTED_EDGE('',*,*,#4973,.F.);
#6562=ORIENTED_EDGE('',*,*,#4974,.T.);
#6563=ORIENTED_EDGE('',*,*,#4975,.F.);
#6564=ORIENTED_EDGE('',*,*,#4976,.F.);
#6565=ORIENTED_EDGE('',*,*,#4977,.F.);
#6566=ORIENTED_EDGE('',*,*,#4978,.F.);
#6567=ORIENTED_EDGE('',*,*,#4979,.F.);
#6568=ORIENTED_EDGE('',*,*,#4980,.F.);
#6569=ORIENTED_EDGE('',*,*,#4981,.F.);
#6570=ORIENTED_EDGE('',*,*,#4982,.F.);
#6571=ORIENTED_EDGE('',*,*,#4983,.F.);
#6572=ORIENTED_EDGE('',*,*,#4984,.T.);
#6573=ORIENTED_EDGE('',*,*,#4933,.T.);
#6574=ORIENTED_EDGE('',*,*,#4982,.T.);
#6575=ORIENTED_EDGE('',*,*,#4985,.T.);
#6576=ORIENTED_EDGE('',*,*,#4978,.T.);
#6577=ORIENTED_EDGE('',*,*,#4986,.T.);
#6578=ORIENTED_EDGE('',*,*,#4987,.T.);
#6579=ORIENTED_EDGE('',*,*,#4988,.T.);
#6580=ORIENTED_EDGE('',*,*,#4989,.F.);
#6581=ORIENTED_EDGE('',*,*,#4990,.F.);
#6582=ORIENTED_EDGE('',*,*,#4991,.F.);
#6583=ORIENTED_EDGE('',*,*,#4992,.F.);
#6584=ORIENTED_EDGE('',*,*,#4993,.F.);
#6585=ORIENTED_EDGE('',*,*,#4994,.F.);
#6586=ORIENTED_EDGE('',*,*,#4977,.T.);
#6587=ORIENTED_EDGE('',*,*,#4995,.F.);
#6588=ORIENTED_EDGE('',*,*,#4993,.T.);
#6589=ORIENTED_EDGE('',*,*,#4996,.T.);
#6590=ORIENTED_EDGE('',*,*,#4997,.F.);
#6591=ORIENTED_EDGE('',*,*,#4998,.T.);
#6592=ORIENTED_EDGE('',*,*,#4999,.T.);
#6593=ORIENTED_EDGE('',*,*,#5000,.T.);
#6594=ORIENTED_EDGE('',*,*,#5001,.F.);
#6595=ORIENTED_EDGE('',*,*,#4991,.T.);
#6596=ORIENTED_EDGE('',*,*,#5002,.F.);
#6597=ORIENTED_EDGE('',*,*,#4999,.F.);
#6598=ORIENTED_EDGE('',*,*,#5003,.T.);
#6599=ORIENTED_EDGE('',*,*,#5004,.F.);
#6600=ORIENTED_EDGE('',*,*,#5005,.F.);
#6601=ORIENTED_EDGE('',*,*,#5006,.F.);
#6602=ORIENTED_EDGE('',*,*,#5007,.T.);
#6603=ORIENTED_EDGE('',*,*,#5008,.F.);
#6604=ORIENTED_EDGE('',*,*,#5009,.F.);
#6605=ORIENTED_EDGE('',*,*,#5010,.F.);
#6606=ORIENTED_EDGE('',*,*,#5011,.T.);
#6607=ORIENTED_EDGE('',*,*,#5012,.T.);
#6608=ORIENTED_EDGE('',*,*,#4992,.T.);
#6609=ORIENTED_EDGE('',*,*,#5013,.T.);
#6610=ORIENTED_EDGE('',*,*,#5009,.T.);
#6611=ORIENTED_EDGE('',*,*,#4931,.T.);
#6612=ORIENTED_EDGE('',*,*,#5014,.T.);
#6613=ORIENTED_EDGE('',*,*,#5015,.T.);
#6614=ORIENTED_EDGE('',*,*,#5005,.T.);
#6615=ORIENTED_EDGE('',*,*,#5016,.T.);
#6616=ORIENTED_EDGE('',*,*,#5010,.T.);
#6617=ORIENTED_EDGE('',*,*,#5017,.T.);
#6618=ORIENTED_EDGE('',*,*,#5008,.T.);
#6619=ORIENTED_EDGE('',*,*,#5018,.T.);
#6620=ORIENTED_EDGE('',*,*,#4983,.T.);
#6621=ORIENTED_EDGE('',*,*,#4932,.T.);
#6622=ORIENTED_EDGE('',*,*,#5019,.T.);
#6623=ORIENTED_EDGE('',*,*,#5020,.T.);
#6624=ORIENTED_EDGE('',*,*,#5006,.T.);
#6625=ORIENTED_EDGE('',*,*,#5021,.T.);
#6626=ORIENTED_EDGE('',*,*,#5022,.F.);
#6627=ORIENTED_EDGE('',*,*,#5023,.T.);
#6628=ORIENTED_EDGE('',*,*,#5019,.F.);
#6629=ORIENTED_EDGE('',*,*,#5024,.T.);
#6630=ORIENTED_EDGE('',*,*,#4887,.F.);
#6631=ORIENTED_EDGE('',*,*,#5025,.T.);
#6632=ORIENTED_EDGE('',*,*,#5004,.T.);
#6633=ORIENTED_EDGE('',*,*,#5026,.T.);
#6634=ORIENTED_EDGE('',*,*,#4972,.T.);
#6635=ORIENTED_EDGE('',*,*,#5027,.T.);
#6636=ORIENTED_EDGE('',*,*,#4981,.T.);
#6637=ORIENTED_EDGE('',*,*,#5028,.T.);
#6638=ORIENTED_EDGE('',*,*,#5029,.T.);
#6639=ORIENTED_EDGE('',*,*,#5030,.F.);
#6640=ORIENTED_EDGE('',*,*,#4979,.T.);
#6641=ORIENTED_EDGE('',*,*,#5031,.T.);
#6642=ORIENTED_EDGE('',*,*,#5032,.F.);
#6643=ORIENTED_EDGE('',*,*,#5033,.T.);
#6644=ORIENTED_EDGE('',*,*,#5029,.F.);
#6645=ORIENTED_EDGE('',*,*,#5034,.T.);
#6646=ORIENTED_EDGE('',*,*,#5035,.F.);
#6647=ORIENTED_EDGE('',*,*,#4857,.F.);
#6648=ORIENTED_EDGE('',*,*,#5036,.T.);
#6649=ORIENTED_EDGE('',*,*,#4973,.T.);
#6650=ORIENTED_EDGE('',*,*,#5037,.T.);
#6651=ORIENTED_EDGE('',*,*,#5038,.T.);
#6652=ORIENTED_EDGE('',*,*,#5039,.T.);
#6653=ORIENTED_EDGE('',*,*,#4971,.T.);
#6654=ORIENTED_EDGE('',*,*,#5040,.T.);
#6655=ORIENTED_EDGE('',*,*,#5041,.F.);
#6656=ORIENTED_EDGE('',*,*,#5042,.T.);
#6657=ORIENTED_EDGE('',*,*,#5038,.F.);
#6658=ORIENTED_EDGE('',*,*,#5043,.T.);
#6659=ORIENTED_EDGE('',*,*,#5011,.F.);
#6660=ORIENTED_EDGE('',*,*,#5044,.F.);
#6661=ORIENTED_EDGE('',*,*,#4812,.F.);
#6662=ORIENTED_EDGE('',*,*,#5045,.F.);
#6663=ORIENTED_EDGE('',*,*,#5046,.T.);
#6664=ORIENTED_EDGE('',*,*,#5015,.F.);
#6665=ORIENTED_EDGE('',*,*,#5047,.T.);
#6666=ORIENTED_EDGE('',*,*,#4838,.T.);
#6667=ORIENTED_EDGE('',*,*,#5044,.T.);
#6668=ORIENTED_EDGE('',*,*,#4986,.F.);
#6669=ORIENTED_EDGE('',*,*,#4996,.F.);
#6670=ORIENTED_EDGE('',*,*,#5012,.F.);
#6671=ORIENTED_EDGE('',*,*,#5046,.F.);
#6672=ORIENTED_EDGE('',*,*,#5048,.F.);
#6673=ORIENTED_EDGE('',*,*,#5049,.F.);
#6674=ORIENTED_EDGE('',*,*,#5014,.F.);
#6675=ORIENTED_EDGE('',*,*,#4930,.T.);
#6676=ORIENTED_EDGE('',*,*,#5050,.F.);
#6677=ORIENTED_EDGE('',*,*,#5051,.F.);
#6678=ORIENTED_EDGE('',*,*,#5047,.F.);
#6679=ORIENTED_EDGE('',*,*,#4997,.T.);
#6680=ORIENTED_EDGE('',*,*,#5052,.T.);
#6681=ORIENTED_EDGE('',*,*,#5053,.T.);
#6682=ORIENTED_EDGE('',*,*,#5054,.T.);
#6683=ORIENTED_EDGE('',*,*,#5035,.T.);
#6684=ORIENTED_EDGE('',*,*,#5055,.T.);
#6685=ORIENTED_EDGE('',*,*,#5056,.F.);
#6686=ORIENTED_EDGE('',*,*,#5057,.T.);
#6687=ORIENTED_EDGE('',*,*,#5034,.F.);
#6688=ORIENTED_EDGE('',*,*,#5031,.F.);
#6689=ORIENTED_EDGE('',*,*,#4985,.F.);
#6690=ORIENTED_EDGE('',*,*,#5027,.F.);
#6691=ORIENTED_EDGE('',*,*,#5039,.F.);
#6692=ORIENTED_EDGE('',*,*,#5058,.F.);
#6693=ORIENTED_EDGE('',*,*,#5059,.F.);
#6694=ORIENTED_EDGE('',*,*,#5060,.F.);
#6695=ORIENTED_EDGE('',*,*,#5055,.F.);
#6696=ORIENTED_EDGE('',*,*,#5042,.F.);
#6697=ORIENTED_EDGE('',*,*,#5061,.F.);
#6698=ORIENTED_EDGE('',*,*,#5062,.T.);
#6699=ORIENTED_EDGE('',*,*,#5058,.T.);
#6700=ORIENTED_EDGE('',*,*,#4852,.F.);
#6701=ORIENTED_EDGE('',*,*,#5063,.T.);
#6702=ORIENTED_EDGE('',*,*,#4874,.F.);
#6703=ORIENTED_EDGE('',*,*,#5064,.T.);
#6704=ORIENTED_EDGE('',*,*,#4842,.F.);
#6705=ORIENTED_EDGE('',*,*,#5037,.F.);
#6706=ORIENTED_EDGE('',*,*,#5028,.F.);
#6707=ORIENTED_EDGE('',*,*,#5018,.F.);
#6708=ORIENTED_EDGE('',*,*,#5016,.F.);
#6709=ORIENTED_EDGE('',*,*,#5025,.F.);
#6710=ORIENTED_EDGE('',*,*,#4889,.F.);
#6711=ORIENTED_EDGE('',*,*,#4880,.F.);
#6712=ORIENTED_EDGE('',*,*,#4871,.F.);
#6713=ORIENTED_EDGE('',*,*,#5063,.F.);
#6714=ORIENTED_EDGE('',*,*,#4854,.F.);
#6715=ORIENTED_EDGE('',*,*,#4844,.F.);
#6716=ORIENTED_EDGE('',*,*,#4955,.F.);
#6717=ORIENTED_EDGE('',*,*,#4957,.F.);
#6718=ORIENTED_EDGE('',*,*,#5065,.T.);
#6719=ORIENTED_EDGE('',*,*,#4868,.T.);
#6720=ORIENTED_EDGE('',*,*,#4969,.F.);
#6721=ORIENTED_EDGE('',*,*,#5066,.T.);
#6722=ORIENTED_EDGE('',*,*,#5059,.T.);
#6723=ORIENTED_EDGE('',*,*,#5062,.F.);
#6724=ORIENTED_EDGE('',*,*,#5067,.T.);
#6725=ORIENTED_EDGE('',*,*,#5056,.T.);
#6726=ORIENTED_EDGE('',*,*,#5060,.T.);
#6727=ORIENTED_EDGE('',*,*,#5066,.F.);
#6728=ORIENTED_EDGE('',*,*,#5068,.F.);
#6729=ORIENTED_EDGE('',*,*,#5024,.F.);
#6730=ORIENTED_EDGE('',*,*,#5069,.T.);
#6731=ORIENTED_EDGE('',*,*,#5070,.T.);
#6732=ORIENTED_EDGE('',*,*,#5071,.T.);
#6733=ORIENTED_EDGE('',*,*,#5072,.T.);
#6734=ORIENTED_EDGE('',*,*,#5073,.T.);
#6735=ORIENTED_EDGE('',*,*,#5070,.F.);
#6736=ORIENTED_EDGE('',*,*,#5074,.T.);
#6737=ORIENTED_EDGE('',*,*,#5053,.F.);
#6738=ORIENTED_EDGE('',*,*,#5075,.F.);
#6739=ORIENTED_EDGE('',*,*,#5072,.F.);
#6740=ORIENTED_EDGE('',*,*,#5076,.T.);
#6741=ORIENTED_EDGE('',*,*,#4998,.F.);
#6742=ORIENTED_EDGE('',*,*,#5054,.F.);
#6743=ORIENTED_EDGE('',*,*,#5076,.F.);
#6744=ORIENTED_EDGE('',*,*,#5074,.F.);
#6745=ORIENTED_EDGE('',*,*,#5069,.F.);
#6746=ORIENTED_EDGE('',*,*,#5021,.F.);
#6747=ORIENTED_EDGE('',*,*,#5017,.F.);
#6748=ORIENTED_EDGE('',*,*,#5013,.F.);
#6749=ORIENTED_EDGE('',*,*,#5003,.F.);
#6750=ORIENTED_EDGE('',*,*,#4984,.F.);
#6751=ORIENTED_EDGE('',*,*,#5077,.F.);
#6752=ORIENTED_EDGE('',*,*,#5078,.F.);
#6753=ORIENTED_EDGE('',*,*,#4965,.F.);
#6754=ORIENTED_EDGE('',*,*,#4934,.T.);
#6755=ORIENTED_EDGE('',*,*,#5079,.F.);
#6756=ORIENTED_EDGE('',*,*,#5080,.F.);
#6757=ORIENTED_EDGE('',*,*,#5081,.T.);
#6758=ORIENTED_EDGE('',*,*,#5082,.F.);
#6759=ORIENTED_EDGE('',*,*,#4987,.F.);
#6760=ORIENTED_EDGE('',*,*,#5049,.T.);
#6761=ORIENTED_EDGE('',*,*,#5083,.F.);
#6762=ORIENTED_EDGE('',*,*,#4817,.F.);
#6763=ORIENTED_EDGE('',*,*,#5084,.F.);
#6764=ORIENTED_EDGE('',*,*,#5085,.T.);
#6765=ORIENTED_EDGE('',*,*,#4809,.F.);
#6766=ORIENTED_EDGE('',*,*,#5086,.F.);
#6767=ORIENTED_EDGE('',*,*,#5087,.F.);
#6768=ORIENTED_EDGE('',*,*,#5083,.T.);
#6769=ORIENTED_EDGE('',*,*,#5048,.T.);
#6770=ORIENTED_EDGE('',*,*,#5045,.T.);
#6771=ORIENTED_EDGE('',*,*,#4815,.T.);
#6772=ORIENTED_EDGE('',*,*,#5051,.T.);
#6773=ORIENTED_EDGE('',*,*,#5088,.T.);
#6774=ORIENTED_EDGE('',*,*,#5086,.T.);
#6775=ORIENTED_EDGE('',*,*,#4839,.T.);
#6776=ORIENTED_EDGE('',*,*,#5087,.T.);
#6777=ORIENTED_EDGE('',*,*,#5089,.T.);
#6778=ORIENTED_EDGE('',*,*,#5082,.T.);
#6779=ORIENTED_EDGE('',*,*,#5090,.T.);
#6780=ORIENTED_EDGE('',*,*,#4798,.F.);
#6781=ORIENTED_EDGE('',*,*,#5091,.T.);
#6782=ORIENTED_EDGE('',*,*,#5080,.T.);
#6783=ORIENTED_EDGE('',*,*,#5092,.T.);
#6784=ORIENTED_EDGE('',*,*,#4988,.F.);
#6785=ORIENTED_EDGE('',*,*,#5084,.T.);
#6786=ORIENTED_EDGE('',*,*,#5093,.T.);
#6787=ORIENTED_EDGE('',*,*,#5077,.T.);
#6788=ORIENTED_EDGE('',*,*,#4913,.F.);
#6789=ORIENTED_EDGE('',*,*,#5094,.T.);
#6790=ORIENTED_EDGE('',*,*,#5050,.T.);
#6791=ORIENTED_EDGE('',*,*,#4929,.T.);
#6792=ORIENTED_EDGE('',*,*,#4920,.F.);
#6793=ORIENTED_EDGE('',*,*,#5078,.T.);
#6794=ORIENTED_EDGE('',*,*,#5095,.T.);
#6795=ORIENTED_EDGE('',*,*,#5079,.T.);
#6796=ORIENTED_EDGE('',*,*,#5096,.T.);
#6797=ORIENTED_EDGE('',*,*,#4806,.F.);
#6798=ORIENTED_EDGE('',*,*,#4810,.F.);
#6799=ORIENTED_EDGE('',*,*,#5085,.F.);
#6800=ORIENTED_EDGE('',*,*,#5090,.F.);
#6801=ORIENTED_EDGE('',*,*,#5081,.F.);
#6802=ORIENTED_EDGE('',*,*,#5091,.F.);
#6803=ORIENTED_EDGE('',*,*,#4801,.F.);
#6804=ORIENTED_EDGE('',*,*,#4803,.F.);
#6805=ORIENTED_EDGE('',*,*,#5092,.F.);
#6806=ORIENTED_EDGE('',*,*,#5095,.F.);
#6807=ORIENTED_EDGE('',*,*,#5093,.F.);
#6808=ORIENTED_EDGE('',*,*,#4816,.F.);
#6809=ORIENTED_EDGE('',*,*,#4937,.T.);
#6810=ORIENTED_EDGE('',*,*,#4961,.F.);
#6811=ORIENTED_EDGE('',*,*,#4958,.F.);
#6812=ORIENTED_EDGE('',*,*,#4968,.F.);
#6813=ORIENTED_EDGE('',*,*,#4866,.F.);
#6814=ORIENTED_EDGE('',*,*,#5065,.F.);
#6815=ORIENTED_EDGE('',*,*,#4962,.F.);
#6816=ORIENTED_EDGE('',*,*,#4964,.F.);
#6817=ORIENTED_EDGE('',*,*,#4910,.F.);
#6818=ORIENTED_EDGE('',*,*,#4912,.F.);
#6819=ORIENTED_EDGE('',*,*,#5097,.T.);
#6820=ORIENTED_EDGE('',*,*,#4897,.T.);
#6821=ORIENTED_EDGE('',*,*,#4941,.F.);
#6822=ORIENTED_EDGE('',*,*,#4928,.T.);
#6823=ORIENTED_EDGE('',*,*,#4917,.F.);
#6824=ORIENTED_EDGE('',*,*,#4914,.F.);
#6825=ORIENTED_EDGE('',*,*,#4940,.F.);
#6826=ORIENTED_EDGE('',*,*,#4895,.F.);
#6827=ORIENTED_EDGE('',*,*,#5097,.F.);
#6828=ORIENTED_EDGE('',*,*,#4919,.F.);
#6829=ORIENTED_EDGE('',*,*,#4922,.F.);
#6830=ORIENTED_EDGE('',*,*,#4900,.F.);
#6831=ORIENTED_EDGE('',*,*,#4927,.F.);
#6832=ORIENTED_EDGE('',*,*,#4953,.F.);
#6833=ORIENTED_EDGE('',*,*,#4951,.F.);
#6834=ORIENTED_EDGE('',*,*,#4945,.F.);
#6835=ORIENTED_EDGE('',*,*,#4966,.F.);
#6836=ORIENTED_EDGE('',*,*,#5096,.F.);
#6837=ORIENTED_EDGE('',*,*,#5089,.F.);
#6838=ORIENTED_EDGE('',*,*,#5088,.F.);
#6839=ORIENTED_EDGE('',*,*,#5094,.F.);
#6840=ORIENTED_EDGE('',*,*,#4908,.F.);
#6841=ORIENTED_EDGE('',*,*,#4906,.F.);
#6842=ORIENTED_EDGE('',*,*,#5098,.F.);
#6843=ORIENTED_EDGE('',*,*,#4876,.F.);
#6844=ORIENTED_EDGE('',*,*,#4893,.F.);
#6845=ORIENTED_EDGE('',*,*,#4942,.F.);
#6846=ORIENTED_EDGE('',*,*,#4896,.F.);
#6847=ORIENTED_EDGE('',*,*,#4884,.F.);
#6848=ORIENTED_EDGE('',*,*,#5099,.F.);
#6849=ORIENTED_EDGE('',*,*,#4859,.F.);
#6850=ORIENTED_EDGE('',*,*,#4864,.F.);
#6851=ORIENTED_EDGE('',*,*,#4970,.F.);
#6852=ORIENTED_EDGE('',*,*,#4867,.F.);
#6853=ORIENTED_EDGE('',*,*,#4849,.F.);
#6854=ORIENTED_EDGE('',*,*,#5099,.T.);
#6855=ORIENTED_EDGE('',*,*,#4848,.F.);
#6856=ORIENTED_EDGE('',*,*,#5064,.F.);
#6857=ORIENTED_EDGE('',*,*,#4877,.F.);
#6858=ORIENTED_EDGE('',*,*,#5098,.T.);
#6859=ORIENTED_EDGE('',*,*,#4883,.F.);
#6860=ORIENTED_EDGE('',*,*,#5026,.F.);
#6861=ORIENTED_EDGE('',*,*,#5007,.F.);
#6862=ORIENTED_EDGE('',*,*,#5020,.F.);
#6863=ORIENTED_EDGE('',*,*,#5023,.F.);
#6864=ORIENTED_EDGE('',*,*,#5100,.F.);
#6865=ORIENTED_EDGE('',*,*,#5043,.F.);
#6866=ORIENTED_EDGE('',*,*,#5040,.F.);
#6867=ORIENTED_EDGE('',*,*,#4974,.F.);
#6868=ORIENTED_EDGE('',*,*,#5036,.F.);
#6869=ORIENTED_EDGE('',*,*,#4860,.F.);
#6870=ORIENTED_EDGE('',*,*,#5101,.F.);
#6871=ORIENTED_EDGE('',*,*,#5102,.F.);
#6872=ORIENTED_EDGE('',*,*,#5103,.F.);
#6873=ORIENTED_EDGE('',*,*,#5104,.F.);
#6874=ORIENTED_EDGE('',*,*,#5105,.F.);
#6875=ORIENTED_EDGE('',*,*,#5106,.F.);
#6876=ORIENTED_EDGE('',*,*,#5107,.F.);
#6877=ORIENTED_EDGE('',*,*,#5108,.F.);
#6878=ORIENTED_EDGE('',*,*,#5109,.F.);
#6879=ORIENTED_EDGE('',*,*,#5110,.F.);
#6880=ORIENTED_EDGE('',*,*,#5111,.F.);
#6881=ORIENTED_EDGE('',*,*,#5112,.F.);
#6882=ORIENTED_EDGE('',*,*,#5101,.T.);
#6883=ORIENTED_EDGE('',*,*,#5113,.F.);
#6884=ORIENTED_EDGE('',*,*,#5114,.T.);
#6885=ORIENTED_EDGE('',*,*,#5002,.T.);
#6886=ORIENTED_EDGE('',*,*,#4990,.T.);
#6887=ORIENTED_EDGE('',*,*,#4989,.T.);
#6888=ORIENTED_EDGE('',*,*,#4994,.T.);
#6889=ORIENTED_EDGE('',*,*,#4995,.T.);
#6890=ORIENTED_EDGE('',*,*,#4976,.T.);
#6891=ORIENTED_EDGE('',*,*,#4975,.T.);
#6892=ORIENTED_EDGE('',*,*,#4980,.T.);
#6893=ORIENTED_EDGE('',*,*,#5030,.T.);
#6894=ORIENTED_EDGE('',*,*,#5115,.T.);
#6895=ORIENTED_EDGE('',*,*,#5116,.T.);
#6896=ORIENTED_EDGE('',*,*,#5117,.T.);
#6897=ORIENTED_EDGE('',*,*,#5118,.T.);
#6898=ORIENTED_EDGE('',*,*,#5119,.T.);
#6899=ORIENTED_EDGE('',*,*,#5120,.T.);
#6900=ORIENTED_EDGE('',*,*,#5121,.T.);
#6901=ORIENTED_EDGE('',*,*,#5122,.T.);
#6902=ORIENTED_EDGE('',*,*,#5123,.T.);
#6903=ORIENTED_EDGE('',*,*,#5124,.T.);
#6904=ORIENTED_EDGE('',*,*,#5125,.T.);
#6905=ORIENTED_EDGE('',*,*,#5126,.T.);
#6906=ORIENTED_EDGE('',*,*,#5127,.T.);
#6907=ORIENTED_EDGE('',*,*,#5128,.F.);
#6908=ORIENTED_EDGE('',*,*,#5115,.F.);
#6909=ORIENTED_EDGE('',*,*,#5033,.F.);
#6910=ORIENTED_EDGE('',*,*,#5114,.F.);
#6911=ORIENTED_EDGE('',*,*,#5129,.F.);
#6912=ORIENTED_EDGE('',*,*,#5130,.T.);
#6913=ORIENTED_EDGE('',*,*,#5000,.F.);
#6914=ORIENTED_EDGE('',*,*,#5131,.F.);
#6915=ORIENTED_EDGE('',*,*,#5132,.F.);
#6916=ORIENTED_EDGE('',*,*,#5133,.T.);
#6917=ORIENTED_EDGE('',*,*,#5127,.F.);
#6918=ORIENTED_EDGE('',*,*,#5032,.T.);
#6919=ORIENTED_EDGE('',*,*,#5057,.F.);
#6920=ORIENTED_EDGE('',*,*,#5130,.F.);
#6921=ORIENTED_EDGE('',*,*,#5134,.F.);
#6922=ORIENTED_EDGE('',*,*,#5135,.F.);
#6923=ORIENTED_EDGE('',*,*,#5136,.F.);
#6924=ORIENTED_EDGE('',*,*,#5137,.F.);
#6925=ORIENTED_EDGE('',*,*,#5138,.T.);
#6926=ORIENTED_EDGE('',*,*,#5139,.F.);
#6927=ORIENTED_EDGE('',*,*,#5140,.F.);
#6928=ORIENTED_EDGE('',*,*,#5141,.T.);
#6929=ORIENTED_EDGE('',*,*,#5142,.T.);
#6930=ORIENTED_EDGE('',*,*,#5143,.F.);
#6931=ORIENTED_EDGE('',*,*,#5144,.F.);
#6932=ORIENTED_EDGE('',*,*,#5145,.T.);
#6933=ORIENTED_EDGE('',*,*,#5146,.T.);
#6934=ORIENTED_EDGE('',*,*,#5147,.F.);
#6935=ORIENTED_EDGE('',*,*,#5148,.F.);
#6936=ORIENTED_EDGE('',*,*,#5052,.F.);
#6937=ORIENTED_EDGE('',*,*,#5001,.T.);
#6938=ORIENTED_EDGE('',*,*,#5149,.T.);
#6939=ORIENTED_EDGE('',*,*,#5150,.T.);
#6940=ORIENTED_EDGE('',*,*,#5131,.T.);
#6941=ORIENTED_EDGE('',*,*,#5068,.T.);
#6942=ORIENTED_EDGE('',*,*,#5148,.T.);
#6943=ORIENTED_EDGE('',*,*,#5147,.T.);
#6944=ORIENTED_EDGE('',*,*,#5151,.T.);
#6945=ORIENTED_EDGE('',*,*,#5075,.T.);
#6946=ORIENTED_EDGE('',*,*,#5152,.T.);
#6947=ORIENTED_EDGE('',*,*,#5153,.F.);
#6948=ORIENTED_EDGE('',*,*,#5149,.F.);
#6949=ORIENTED_EDGE('',*,*,#5067,.F.);
#6950=ORIENTED_EDGE('',*,*,#5151,.F.);
#6951=ORIENTED_EDGE('',*,*,#5154,.T.);
#6952=ORIENTED_EDGE('',*,*,#5155,.T.);
#6953=ORIENTED_EDGE('',*,*,#5073,.F.);
#6954=ORIENTED_EDGE('',*,*,#5156,.T.);
#6955=ORIENTED_EDGE('',*,*,#5157,.F.);
#6956=ORIENTED_EDGE('',*,*,#5152,.F.);
#6957=ORIENTED_EDGE('',*,*,#5061,.T.);
#6958=ORIENTED_EDGE('',*,*,#5041,.T.);
#6959=ORIENTED_EDGE('',*,*,#5158,.T.);
#6960=ORIENTED_EDGE('',*,*,#5159,.T.);
#6961=ORIENTED_EDGE('',*,*,#5160,.F.);
#6962=ORIENTED_EDGE('',*,*,#5161,.F.);
#6963=ORIENTED_EDGE('',*,*,#5162,.T.);
#6964=ORIENTED_EDGE('',*,*,#5163,.T.);
#6965=ORIENTED_EDGE('',*,*,#5022,.T.);
#6966=ORIENTED_EDGE('',*,*,#5071,.F.);
#6967=ORIENTED_EDGE('',*,*,#5155,.F.);
#6968=ORIENTED_EDGE('',*,*,#5164,.T.);
#6969=ORIENTED_EDGE('',*,*,#5165,.T.);
#6970=ORIENTED_EDGE('',*,*,#4828,.F.);
#6971=ORIENTED_EDGE('',*,*,#4833,.T.);
#6972=ORIENTED_EDGE('',*,*,#5166,.F.);
#6973=ORIENTED_EDGE('',*,*,#5167,.F.);
#6974=ORIENTED_EDGE('',*,*,#5168,.T.);
#6975=ORIENTED_EDGE('',*,*,#5169,.T.);
#6976=ORIENTED_EDGE('',*,*,#5170,.T.);
#6977=ORIENTED_EDGE('',*,*,#5171,.T.);
#6978=ORIENTED_EDGE('',*,*,#5172,.T.);
#6979=ORIENTED_EDGE('',*,*,#5173,.T.);
#6980=ORIENTED_EDGE('',*,*,#5174,.T.);
#6981=ORIENTED_EDGE('',*,*,#5171,.F.);
#6982=ORIENTED_EDGE('',*,*,#5175,.T.);
#6983=ORIENTED_EDGE('',*,*,#5176,.T.);
#6984=ORIENTED_EDGE('',*,*,#5177,.T.);
#6985=ORIENTED_EDGE('',*,*,#5178,.T.);
#6986=ORIENTED_EDGE('',*,*,#5179,.T.);
#6987=ORIENTED_EDGE('',*,*,#5180,.T.);
#6988=ORIENTED_EDGE('',*,*,#5175,.F.);
#6989=ORIENTED_EDGE('',*,*,#5181,.T.);
#6990=ORIENTED_EDGE('',*,*,#5182,.T.);
#6991=ORIENTED_EDGE('',*,*,#5179,.F.);
#6992=ORIENTED_EDGE('',*,*,#5183,.T.);
#6993=ORIENTED_EDGE('',*,*,#5173,.F.);
#6994=ORIENTED_EDGE('',*,*,#5184,.T.);
#6995=ORIENTED_EDGE('',*,*,#5185,.T.);
#6996=ORIENTED_EDGE('',*,*,#5169,.F.);
#6997=ORIENTED_EDGE('',*,*,#5186,.T.);
#6998=ORIENTED_EDGE('',*,*,#5187,.T.);
#6999=ORIENTED_EDGE('',*,*,#5188,.T.);
#7000=ORIENTED_EDGE('',*,*,#5184,.F.);
#7001=ORIENTED_EDGE('',*,*,#5189,.T.);
#7002=ORIENTED_EDGE('',*,*,#5189,.F.);
#7003=ORIENTED_EDGE('',*,*,#5186,.F.);
#7004=ORIENTED_EDGE('',*,*,#5168,.F.);
#7005=ORIENTED_EDGE('',*,*,#5190,.F.);
#7006=ORIENTED_EDGE('',*,*,#5191,.T.);
#7007=ORIENTED_EDGE('',*,*,#5192,.T.);
#7008=ORIENTED_EDGE('',*,*,#5174,.F.);
#7009=ORIENTED_EDGE('',*,*,#5193,.T.);
#7010=ORIENTED_EDGE('',*,*,#5194,.T.);
#7011=ORIENTED_EDGE('',*,*,#5190,.T.);
#7012=ORIENTED_EDGE('',*,*,#5183,.F.);
#7013=ORIENTED_EDGE('',*,*,#5181,.F.);
#7014=ORIENTED_EDGE('',*,*,#5178,.F.);
#7015=ORIENTED_EDGE('',*,*,#5195,.T.);
#7016=ORIENTED_EDGE('',*,*,#5196,.F.);
#7017=ORIENTED_EDGE('',*,*,#5193,.F.);
#7018=ORIENTED_EDGE('',*,*,#5197,.T.);
#7019=ORIENTED_EDGE('',*,*,#5198,.T.);
#7020=ORIENTED_EDGE('',*,*,#5199,.T.);
#7021=ORIENTED_EDGE('',*,*,#5200,.T.);
#7022=ORIENTED_EDGE('',*,*,#5201,.T.);
#7023=ORIENTED_EDGE('',*,*,#5202,.T.);
#7024=ORIENTED_EDGE('',*,*,#5198,.F.);
#7025=ORIENTED_EDGE('',*,*,#5203,.T.);
#7026=ORIENTED_EDGE('',*,*,#5204,.T.);
#7027=ORIENTED_EDGE('',*,*,#5205,.T.);
#7028=ORIENTED_EDGE('',*,*,#5201,.F.);
#7029=ORIENTED_EDGE('',*,*,#5206,.T.);
#7030=ORIENTED_EDGE('',*,*,#5207,.T.);
#7031=ORIENTED_EDGE('',*,*,#5200,.F.);
#7032=ORIENTED_EDGE('',*,*,#5208,.T.);
#7033=ORIENTED_EDGE('',*,*,#5209,.T.);
#7034=ORIENTED_EDGE('',*,*,#5210,.T.);
#7035=ORIENTED_EDGE('',*,*,#5211,.T.);
#7036=ORIENTED_EDGE('',*,*,#5212,.T.);
#7037=ORIENTED_EDGE('',*,*,#5213,.T.);
#7038=ORIENTED_EDGE('',*,*,#5214,.T.);
#7039=ORIENTED_EDGE('',*,*,#5215,.T.);
#7040=ORIENTED_EDGE('',*,*,#5210,.F.);
#7041=ORIENTED_EDGE('',*,*,#5216,.T.);
#7042=ORIENTED_EDGE('',*,*,#5217,.T.);
#7043=ORIENTED_EDGE('',*,*,#5214,.F.);
#7044=ORIENTED_EDGE('',*,*,#5218,.T.);
#7045=ORIENTED_EDGE('',*,*,#5209,.F.);
#7046=ORIENTED_EDGE('',*,*,#5206,.F.);
#7047=ORIENTED_EDGE('',*,*,#5203,.F.);
#7048=ORIENTED_EDGE('',*,*,#5197,.F.);
#7049=ORIENTED_EDGE('',*,*,#5219,.F.);
#7050=ORIENTED_EDGE('',*,*,#5220,.T.);
#7051=ORIENTED_EDGE('',*,*,#5221,.T.);
#7052=ORIENTED_EDGE('',*,*,#5207,.F.);
#7053=ORIENTED_EDGE('',*,*,#5222,.T.);
#7054=ORIENTED_EDGE('',*,*,#5223,.T.);
#7055=ORIENTED_EDGE('',*,*,#5219,.T.);
#7056=ORIENTED_EDGE('',*,*,#5218,.F.);
#7057=ORIENTED_EDGE('',*,*,#5216,.F.);
#7058=ORIENTED_EDGE('',*,*,#5213,.F.);
#7059=ORIENTED_EDGE('',*,*,#5224,.T.);
#7060=ORIENTED_EDGE('',*,*,#5225,.F.);
#7061=ORIENTED_EDGE('',*,*,#5222,.F.);
#7062=ORIENTED_EDGE('',*,*,#5226,.T.);
#7063=ORIENTED_EDGE('',*,*,#5227,.T.);
#7064=ORIENTED_EDGE('',*,*,#5228,.T.);
#7065=ORIENTED_EDGE('',*,*,#5229,.T.);
#7066=ORIENTED_EDGE('',*,*,#5230,.T.);
#7067=ORIENTED_EDGE('',*,*,#5231,.T.);
#7068=ORIENTED_EDGE('',*,*,#5227,.F.);
#7069=ORIENTED_EDGE('',*,*,#5232,.T.);
#7070=ORIENTED_EDGE('',*,*,#5233,.T.);
#7071=ORIENTED_EDGE('',*,*,#5229,.F.);
#7072=ORIENTED_EDGE('',*,*,#5234,.T.);
#7073=ORIENTED_EDGE('',*,*,#5235,.T.);
#7074=ORIENTED_EDGE('',*,*,#5236,.T.);
#7075=ORIENTED_EDGE('',*,*,#5237,.T.);
#7076=ORIENTED_EDGE('',*,*,#5238,.T.);
#7077=ORIENTED_EDGE('',*,*,#5235,.F.);
#7078=ORIENTED_EDGE('',*,*,#5239,.T.);
#7079=ORIENTED_EDGE('',*,*,#5240,.T.);
#7080=ORIENTED_EDGE('',*,*,#5237,.F.);
#7081=ORIENTED_EDGE('',*,*,#5241,.T.);
#7082=ORIENTED_EDGE('',*,*,#5242,.T.);
#7083=ORIENTED_EDGE('',*,*,#5243,.T.);
#7084=ORIENTED_EDGE('',*,*,#5244,.T.);
#7085=ORIENTED_EDGE('',*,*,#5230,.F.);
#7086=ORIENTED_EDGE('',*,*,#5245,.T.);
#7087=ORIENTED_EDGE('',*,*,#5246,.T.);
#7088=ORIENTED_EDGE('',*,*,#5243,.F.);
#7089=ORIENTED_EDGE('',*,*,#5247,.T.);
#7090=ORIENTED_EDGE('',*,*,#5239,.F.);
#7091=ORIENTED_EDGE('',*,*,#5248,.T.);
#7092=ORIENTED_EDGE('',*,*,#5249,.T.);
#7093=ORIENTED_EDGE('',*,*,#5250,.T.);
#7094=ORIENTED_EDGE('',*,*,#5249,.F.);
#7095=ORIENTED_EDGE('',*,*,#5251,.T.);
#7096=ORIENTED_EDGE('',*,*,#5231,.F.);
#7097=ORIENTED_EDGE('',*,*,#5244,.F.);
#7098=ORIENTED_EDGE('',*,*,#5252,.T.);
#7099=ORIENTED_EDGE('',*,*,#5253,.F.);
#7100=ORIENTED_EDGE('',*,*,#5254,.F.);
#7101=ORIENTED_EDGE('',*,*,#5255,.T.);
#7102=ORIENTED_EDGE('',*,*,#5246,.F.);
#7103=ORIENTED_EDGE('',*,*,#5256,.F.);
#7104=ORIENTED_EDGE('',*,*,#5251,.F.);
#7105=ORIENTED_EDGE('',*,*,#5257,.F.);
#7106=ORIENTED_EDGE('',*,*,#5258,.F.);
#7107=ORIENTED_EDGE('',*,*,#5259,.F.);
#7108=ORIENTED_EDGE('',*,*,#5260,.F.);
#7109=ORIENTED_EDGE('',*,*,#5261,.F.);
#7110=ORIENTED_EDGE('',*,*,#5262,.F.);
#7111=ORIENTED_EDGE('',*,*,#5263,.F.);
#7112=ORIENTED_EDGE('',*,*,#5264,.F.);
#7113=ORIENTED_EDGE('',*,*,#5265,.F.);
#7114=ORIENTED_EDGE('',*,*,#5266,.F.);
#7115=ORIENTED_EDGE('',*,*,#5252,.F.);
#7116=ORIENTED_EDGE('',*,*,#5267,.F.);
#7117=ORIENTED_EDGE('',*,*,#5220,.F.);
#7118=ORIENTED_EDGE('',*,*,#5268,.T.);
#7119=ORIENTED_EDGE('',*,*,#5232,.F.);
#7120=ORIENTED_EDGE('',*,*,#5226,.F.);
#7121=ORIENTED_EDGE('',*,*,#5233,.F.);
#7122=ORIENTED_EDGE('',*,*,#5269,.T.);
#7123=ORIENTED_EDGE('',*,*,#5270,.T.);
#7124=ORIENTED_EDGE('',*,*,#5267,.T.);
#7125=ORIENTED_EDGE('',*,*,#5271,.T.);
#7126=ORIENTED_EDGE('',*,*,#5272,.T.);
#7127=ORIENTED_EDGE('',*,*,#5273,.T.);
#7128=ORIENTED_EDGE('',*,*,#5274,.T.);
#7129=ORIENTED_EDGE('',*,*,#5275,.T.);
#7130=ORIENTED_EDGE('',*,*,#5276,.T.);
#7131=ORIENTED_EDGE('',*,*,#5272,.F.);
#7132=ORIENTED_EDGE('',*,*,#5277,.T.);
#7133=ORIENTED_EDGE('',*,*,#5278,.T.);
#7134=ORIENTED_EDGE('',*,*,#5274,.F.);
#7135=ORIENTED_EDGE('',*,*,#5279,.T.);
#7136=ORIENTED_EDGE('',*,*,#5280,.T.);
#7137=ORIENTED_EDGE('',*,*,#5281,.T.);
#7138=ORIENTED_EDGE('',*,*,#5282,.T.);
#7139=ORIENTED_EDGE('',*,*,#5283,.T.);
#7140=ORIENTED_EDGE('',*,*,#5280,.F.);
#7141=ORIENTED_EDGE('',*,*,#5284,.T.);
#7142=ORIENTED_EDGE('',*,*,#5285,.T.);
#7143=ORIENTED_EDGE('',*,*,#5282,.F.);
#7144=ORIENTED_EDGE('',*,*,#5254,.T.);
#7145=ORIENTED_EDGE('',*,*,#5286,.T.);
#7146=ORIENTED_EDGE('',*,*,#5287,.T.);
#7147=ORIENTED_EDGE('',*,*,#5288,.T.);
#7148=ORIENTED_EDGE('',*,*,#5275,.F.);
#7149=ORIENTED_EDGE('',*,*,#5289,.T.);
#7150=ORIENTED_EDGE('',*,*,#5264,.T.);
#7151=ORIENTED_EDGE('',*,*,#5287,.F.);
#7152=ORIENTED_EDGE('',*,*,#5290,.T.);
#7153=ORIENTED_EDGE('',*,*,#5284,.F.);
#7154=ORIENTED_EDGE('',*,*,#5253,.T.);
#7155=ORIENTED_EDGE('',*,*,#5291,.T.);
#7156=ORIENTED_EDGE('',*,*,#5292,.T.);
#7157=ORIENTED_EDGE('',*,*,#5291,.F.);
#7158=ORIENTED_EDGE('',*,*,#5266,.T.);
#7159=ORIENTED_EDGE('',*,*,#5276,.F.);
#7160=ORIENTED_EDGE('',*,*,#5288,.F.);
#7161=ORIENTED_EDGE('',*,*,#5263,.T.);
#7162=ORIENTED_EDGE('',*,*,#5293,.T.);
#7163=ORIENTED_EDGE('',*,*,#5294,.T.);
#7164=ORIENTED_EDGE('',*,*,#5295,.F.);
#7165=ORIENTED_EDGE('',*,*,#5191,.F.);
#7166=ORIENTED_EDGE('',*,*,#5296,.T.);
#7167=ORIENTED_EDGE('',*,*,#5277,.F.);
#7168=ORIENTED_EDGE('',*,*,#5271,.F.);
#7169=ORIENTED_EDGE('',*,*,#5278,.F.);
#7170=ORIENTED_EDGE('',*,*,#5297,.T.);
#7171=ORIENTED_EDGE('',*,*,#5298,.T.);
#7172=ORIENTED_EDGE('',*,*,#5295,.T.);
#7173=ORIENTED_EDGE('',*,*,#5299,.F.);
#7174=ORIENTED_EDGE('',*,*,#5300,.F.);
#7175=ORIENTED_EDGE('',*,*,#5301,.F.);
#7176=ORIENTED_EDGE('',*,*,#5302,.T.);
#7177=ORIENTED_EDGE('',*,*,#5122,.F.);
#7178=ORIENTED_EDGE('',*,*,#5121,.F.);
#7179=ORIENTED_EDGE('',*,*,#5303,.F.);
#7180=ORIENTED_EDGE('',*,*,#5304,.F.);
#7181=ORIENTED_EDGE('',*,*,#5305,.F.);
#7182=ORIENTED_EDGE('',*,*,#5123,.F.);
#7183=ORIENTED_EDGE('',*,*,#5306,.F.);
#7184=ORIENTED_EDGE('',*,*,#5307,.F.);
#7185=ORIENTED_EDGE('',*,*,#5308,.F.);
#7186=ORIENTED_EDGE('',*,*,#5309,.T.);
#7187=ORIENTED_EDGE('',*,*,#5261,.T.);
#7188=ORIENTED_EDGE('',*,*,#5307,.T.);
#7189=ORIENTED_EDGE('',*,*,#5310,.T.);
#7190=ORIENTED_EDGE('',*,*,#5304,.T.);
#7191=ORIENTED_EDGE('',*,*,#5311,.T.);
#7192=ORIENTED_EDGE('',*,*,#5312,.T.);
#7193=ORIENTED_EDGE('',*,*,#5313,.T.);
#7194=ORIENTED_EDGE('',*,*,#5118,.F.);
#7195=ORIENTED_EDGE('',*,*,#5117,.F.);
#7196=ORIENTED_EDGE('',*,*,#5314,.F.);
#7197=ORIENTED_EDGE('',*,*,#5315,.F.);
#7198=ORIENTED_EDGE('',*,*,#5316,.F.);
#7199=ORIENTED_EDGE('',*,*,#5119,.F.);
#7200=ORIENTED_EDGE('',*,*,#5303,.T.);
#7201=ORIENTED_EDGE('',*,*,#5120,.F.);
#7202=ORIENTED_EDGE('',*,*,#5316,.T.);
#7203=ORIENTED_EDGE('',*,*,#5317,.T.);
#7204=ORIENTED_EDGE('',*,*,#5318,.F.);
#7205=ORIENTED_EDGE('',*,*,#5319,.T.);
#7206=ORIENTED_EDGE('',*,*,#5320,.T.);
#7207=ORIENTED_EDGE('',*,*,#5128,.T.);
#7208=ORIENTED_EDGE('',*,*,#5133,.F.);
#7209=ORIENTED_EDGE('',*,*,#5314,.T.);
#7210=ORIENTED_EDGE('',*,*,#5116,.F.);
#7211=ORIENTED_EDGE('',*,*,#5320,.F.);
#7212=ORIENTED_EDGE('',*,*,#5321,.T.);
#7213=ORIENTED_EDGE('',*,*,#5322,.F.);
#7214=ORIENTED_EDGE('',*,*,#5323,.F.);
#7215=ORIENTED_EDGE('',*,*,#5324,.F.);
#7216=ORIENTED_EDGE('',*,*,#5325,.T.);
#7217=ORIENTED_EDGE('',*,*,#5326,.F.);
#7218=ORIENTED_EDGE('',*,*,#5327,.F.);
#7219=ORIENTED_EDGE('',*,*,#5328,.F.);
#7220=ORIENTED_EDGE('',*,*,#5329,.T.);
#7221=ORIENTED_EDGE('',*,*,#5330,.T.);
#7222=ORIENTED_EDGE('',*,*,#5315,.T.);
#7223=ORIENTED_EDGE('',*,*,#5331,.T.);
#7224=ORIENTED_EDGE('',*,*,#5327,.T.);
#7225=ORIENTED_EDGE('',*,*,#5259,.T.);
#7226=ORIENTED_EDGE('',*,*,#5332,.T.);
#7227=ORIENTED_EDGE('',*,*,#5333,.T.);
#7228=ORIENTED_EDGE('',*,*,#5323,.T.);
#7229=ORIENTED_EDGE('',*,*,#5334,.T.);
#7230=ORIENTED_EDGE('',*,*,#5328,.T.);
#7231=ORIENTED_EDGE('',*,*,#5335,.T.);
#7232=ORIENTED_EDGE('',*,*,#5326,.T.);
#7233=ORIENTED_EDGE('',*,*,#5336,.T.);
#7234=ORIENTED_EDGE('',*,*,#5308,.T.);
#7235=ORIENTED_EDGE('',*,*,#5260,.T.);
#7236=ORIENTED_EDGE('',*,*,#5337,.T.);
#7237=ORIENTED_EDGE('',*,*,#5338,.T.);
#7238=ORIENTED_EDGE('',*,*,#5324,.T.);
#7239=ORIENTED_EDGE('',*,*,#5339,.T.);
#7240=ORIENTED_EDGE('',*,*,#5156,.F.);
#7241=ORIENTED_EDGE('',*,*,#5340,.T.);
#7242=ORIENTED_EDGE('',*,*,#5337,.F.);
#7243=ORIENTED_EDGE('',*,*,#5341,.T.);
#7244=ORIENTED_EDGE('',*,*,#5215,.F.);
#7245=ORIENTED_EDGE('',*,*,#5342,.T.);
#7246=ORIENTED_EDGE('',*,*,#5322,.T.);
#7247=ORIENTED_EDGE('',*,*,#5343,.T.);
#7248=ORIENTED_EDGE('',*,*,#5300,.T.);
#7249=ORIENTED_EDGE('',*,*,#5344,.T.);
#7250=ORIENTED_EDGE('',*,*,#5306,.T.);
#7251=ORIENTED_EDGE('',*,*,#5345,.T.);
#7252=ORIENTED_EDGE('',*,*,#5346,.T.);
#7253=ORIENTED_EDGE('',*,*,#5124,.F.);
#7254=ORIENTED_EDGE('',*,*,#5305,.T.);
#7255=ORIENTED_EDGE('',*,*,#5347,.T.);
#7256=ORIENTED_EDGE('',*,*,#5348,.F.);
#7257=ORIENTED_EDGE('',*,*,#5349,.T.);
#7258=ORIENTED_EDGE('',*,*,#5346,.F.);
#7259=ORIENTED_EDGE('',*,*,#5350,.T.);
#7260=ORIENTED_EDGE('',*,*,#5351,.F.);
#7261=ORIENTED_EDGE('',*,*,#5185,.F.);
#7262=ORIENTED_EDGE('',*,*,#5352,.T.);
#7263=ORIENTED_EDGE('',*,*,#5301,.T.);
#7264=ORIENTED_EDGE('',*,*,#5353,.T.);
#7265=ORIENTED_EDGE('',*,*,#5354,.T.);
#7266=ORIENTED_EDGE('',*,*,#5355,.T.);
#7267=ORIENTED_EDGE('',*,*,#5299,.T.);
#7268=ORIENTED_EDGE('',*,*,#5356,.T.);
#7269=ORIENTED_EDGE('',*,*,#5163,.F.);
#7270=ORIENTED_EDGE('',*,*,#5357,.T.);
#7271=ORIENTED_EDGE('',*,*,#5354,.F.);
#7272=ORIENTED_EDGE('',*,*,#5358,.T.);
#7273=ORIENTED_EDGE('',*,*,#5329,.F.);
#7274=ORIENTED_EDGE('',*,*,#5359,.F.);
#7275=ORIENTED_EDGE('',*,*,#4832,.F.);
#7276=ORIENTED_EDGE('',*,*,#5360,.F.);
#7277=ORIENTED_EDGE('',*,*,#5361,.T.);
#7278=ORIENTED_EDGE('',*,*,#5333,.F.);
#7279=ORIENTED_EDGE('',*,*,#5362,.T.);
#7280=ORIENTED_EDGE('',*,*,#5166,.T.);
#7281=ORIENTED_EDGE('',*,*,#5359,.T.);
#7282=ORIENTED_EDGE('',*,*,#5311,.F.);
#7283=ORIENTED_EDGE('',*,*,#5317,.F.);
#7284=ORIENTED_EDGE('',*,*,#5330,.F.);
#7285=ORIENTED_EDGE('',*,*,#5361,.F.);
#7286=ORIENTED_EDGE('',*,*,#5363,.F.);
#7287=ORIENTED_EDGE('',*,*,#5364,.F.);
#7288=ORIENTED_EDGE('',*,*,#5332,.F.);
#7289=ORIENTED_EDGE('',*,*,#5258,.T.);
#7290=ORIENTED_EDGE('',*,*,#5365,.F.);
#7291=ORIENTED_EDGE('',*,*,#5366,.F.);
#7292=ORIENTED_EDGE('',*,*,#5362,.F.);
#7293=ORIENTED_EDGE('',*,*,#5318,.T.);
#7294=ORIENTED_EDGE('',*,*,#5132,.T.);
#7295=ORIENTED_EDGE('',*,*,#5367,.T.);
#7296=ORIENTED_EDGE('',*,*,#5368,.T.);
#7297=ORIENTED_EDGE('',*,*,#5351,.T.);
#7298=ORIENTED_EDGE('',*,*,#5369,.T.);
#7299=ORIENTED_EDGE('',*,*,#5370,.F.);
#7300=ORIENTED_EDGE('',*,*,#5371,.T.);
#7301=ORIENTED_EDGE('',*,*,#5350,.F.);
#7302=ORIENTED_EDGE('',*,*,#5347,.F.);
#7303=ORIENTED_EDGE('',*,*,#5310,.F.);
#7304=ORIENTED_EDGE('',*,*,#5344,.F.);
#7305=ORIENTED_EDGE('',*,*,#5355,.F.);
#7306=ORIENTED_EDGE('',*,*,#5372,.F.);
#7307=ORIENTED_EDGE('',*,*,#5373,.F.);
#7308=ORIENTED_EDGE('',*,*,#5374,.F.);
#7309=ORIENTED_EDGE('',*,*,#5369,.F.);
#7310=ORIENTED_EDGE('',*,*,#5357,.F.);
#7311=ORIENTED_EDGE('',*,*,#5162,.F.);
#7312=ORIENTED_EDGE('',*,*,#5375,.T.);
#7313=ORIENTED_EDGE('',*,*,#5372,.T.);
#7314=ORIENTED_EDGE('',*,*,#5180,.F.);
#7315=ORIENTED_EDGE('',*,*,#5376,.T.);
#7316=ORIENTED_EDGE('',*,*,#5202,.F.);
#7317=ORIENTED_EDGE('',*,*,#5377,.T.);
#7318=ORIENTED_EDGE('',*,*,#5170,.F.);
#7319=ORIENTED_EDGE('',*,*,#5353,.F.);
#7320=ORIENTED_EDGE('',*,*,#5345,.F.);
#7321=ORIENTED_EDGE('',*,*,#5336,.F.);
#7322=ORIENTED_EDGE('',*,*,#5334,.F.);
#7323=ORIENTED_EDGE('',*,*,#5342,.F.);
#7324=ORIENTED_EDGE('',*,*,#5217,.F.);
#7325=ORIENTED_EDGE('',*,*,#5208,.F.);
#7326=ORIENTED_EDGE('',*,*,#5199,.F.);
#7327=ORIENTED_EDGE('',*,*,#5376,.F.);
#7328=ORIENTED_EDGE('',*,*,#5182,.F.);
#7329=ORIENTED_EDGE('',*,*,#5172,.F.);
#7330=ORIENTED_EDGE('',*,*,#5283,.F.);
#7331=ORIENTED_EDGE('',*,*,#5285,.F.);
#7332=ORIENTED_EDGE('',*,*,#5378,.T.);
#7333=ORIENTED_EDGE('',*,*,#5196,.T.);
#7334=ORIENTED_EDGE('',*,*,#5297,.F.);
#7335=ORIENTED_EDGE('',*,*,#5379,.T.);
#7336=ORIENTED_EDGE('',*,*,#5373,.T.);
#7337=ORIENTED_EDGE('',*,*,#5375,.F.);
#7338=ORIENTED_EDGE('',*,*,#5380,.T.);
#7339=ORIENTED_EDGE('',*,*,#5370,.T.);
#7340=ORIENTED_EDGE('',*,*,#5374,.T.);
#7341=ORIENTED_EDGE('',*,*,#5379,.F.);
#7342=ORIENTED_EDGE('',*,*,#5381,.F.);
#7343=ORIENTED_EDGE('',*,*,#5341,.F.);
#7344=ORIENTED_EDGE('',*,*,#5382,.T.);
#7345=ORIENTED_EDGE('',*,*,#5383,.T.);
#7346=ORIENTED_EDGE('',*,*,#5157,.T.);
#7347=ORIENTED_EDGE('',*,*,#5384,.T.);
#7348=ORIENTED_EDGE('',*,*,#5153,.T.);
#7349=ORIENTED_EDGE('',*,*,#5383,.F.);
#7350=ORIENTED_EDGE('',*,*,#5385,.T.);
#7351=ORIENTED_EDGE('',*,*,#5367,.F.);
#7352=ORIENTED_EDGE('',*,*,#5150,.F.);
#7353=ORIENTED_EDGE('',*,*,#5384,.F.);
#7354=ORIENTED_EDGE('',*,*,#5386,.T.);
#7355=ORIENTED_EDGE('',*,*,#5319,.F.);
#7356=ORIENTED_EDGE('',*,*,#5368,.F.);
#7357=ORIENTED_EDGE('',*,*,#5386,.F.);
#7358=ORIENTED_EDGE('',*,*,#5385,.F.);
#7359=ORIENTED_EDGE('',*,*,#5382,.F.);
#7360=ORIENTED_EDGE('',*,*,#5339,.F.);
#7361=ORIENTED_EDGE('',*,*,#5335,.F.);
#7362=ORIENTED_EDGE('',*,*,#5331,.F.);
#7363=ORIENTED_EDGE('',*,*,#5321,.F.);
#7364=ORIENTED_EDGE('',*,*,#5309,.F.);
#7365=ORIENTED_EDGE('',*,*,#5387,.F.);
#7366=ORIENTED_EDGE('',*,*,#5388,.F.);
#7367=ORIENTED_EDGE('',*,*,#5293,.F.);
#7368=ORIENTED_EDGE('',*,*,#5262,.T.);
#7369=ORIENTED_EDGE('',*,*,#5389,.F.);
#7370=ORIENTED_EDGE('',*,*,#5390,.F.);
#7371=ORIENTED_EDGE('',*,*,#5391,.T.);
#7372=ORIENTED_EDGE('',*,*,#5392,.F.);
#7373=ORIENTED_EDGE('',*,*,#5312,.F.);
#7374=ORIENTED_EDGE('',*,*,#5364,.T.);
#7375=ORIENTED_EDGE('',*,*,#5393,.F.);
#7376=ORIENTED_EDGE('',*,*,#4837,.F.);
#7377=ORIENTED_EDGE('',*,*,#5394,.F.);
#7378=ORIENTED_EDGE('',*,*,#5395,.T.);
#7379=ORIENTED_EDGE('',*,*,#4829,.F.);
#7380=ORIENTED_EDGE('',*,*,#5396,.F.);
#7381=ORIENTED_EDGE('',*,*,#5397,.F.);
#7382=ORIENTED_EDGE('',*,*,#5393,.T.);
#7383=ORIENTED_EDGE('',*,*,#5363,.T.);
#7384=ORIENTED_EDGE('',*,*,#5360,.T.);
#7385=ORIENTED_EDGE('',*,*,#4835,.T.);
#7386=ORIENTED_EDGE('',*,*,#5366,.T.);
#7387=ORIENTED_EDGE('',*,*,#5398,.T.);
#7388=ORIENTED_EDGE('',*,*,#5396,.T.);
#7389=ORIENTED_EDGE('',*,*,#5167,.T.);
#7390=ORIENTED_EDGE('',*,*,#5397,.T.);
#7391=ORIENTED_EDGE('',*,*,#5399,.T.);
#7392=ORIENTED_EDGE('',*,*,#5392,.T.);
#7393=ORIENTED_EDGE('',*,*,#5400,.T.);
#7394=ORIENTED_EDGE('',*,*,#4818,.F.);
#7395=ORIENTED_EDGE('',*,*,#5401,.T.);
#7396=ORIENTED_EDGE('',*,*,#5390,.T.);
#7397=ORIENTED_EDGE('',*,*,#5402,.T.);
#7398=ORIENTED_EDGE('',*,*,#5313,.F.);
#7399=ORIENTED_EDGE('',*,*,#5394,.T.);
#7400=ORIENTED_EDGE('',*,*,#5403,.T.);
#7401=ORIENTED_EDGE('',*,*,#5387,.T.);
#7402=ORIENTED_EDGE('',*,*,#5241,.F.);
#7403=ORIENTED_EDGE('',*,*,#5404,.T.);
#7404=ORIENTED_EDGE('',*,*,#5365,.T.);
#7405=ORIENTED_EDGE('',*,*,#5257,.T.);
#7406=ORIENTED_EDGE('',*,*,#5248,.F.);
#7407=ORIENTED_EDGE('',*,*,#5388,.T.);
#7408=ORIENTED_EDGE('',*,*,#5405,.T.);
#7409=ORIENTED_EDGE('',*,*,#5389,.T.);
#7410=ORIENTED_EDGE('',*,*,#5406,.T.);
#7411=ORIENTED_EDGE('',*,*,#4826,.F.);
#7412=ORIENTED_EDGE('',*,*,#4830,.F.);
#7413=ORIENTED_EDGE('',*,*,#5395,.F.);
#7414=ORIENTED_EDGE('',*,*,#5400,.F.);
#7415=ORIENTED_EDGE('',*,*,#5391,.F.);
#7416=ORIENTED_EDGE('',*,*,#5401,.F.);
#7417=ORIENTED_EDGE('',*,*,#4821,.F.);
#7418=ORIENTED_EDGE('',*,*,#4823,.F.);
#7419=ORIENTED_EDGE('',*,*,#5402,.F.);
#7420=ORIENTED_EDGE('',*,*,#5405,.F.);
#7421=ORIENTED_EDGE('',*,*,#5403,.F.);
#7422=ORIENTED_EDGE('',*,*,#4836,.F.);
#7423=ORIENTED_EDGE('',*,*,#5265,.T.);
#7424=ORIENTED_EDGE('',*,*,#5289,.F.);
#7425=ORIENTED_EDGE('',*,*,#5286,.F.);
#7426=ORIENTED_EDGE('',*,*,#5296,.F.);
#7427=ORIENTED_EDGE('',*,*,#5194,.F.);
#7428=ORIENTED_EDGE('',*,*,#5378,.F.);
#7429=ORIENTED_EDGE('',*,*,#5290,.F.);
#7430=ORIENTED_EDGE('',*,*,#5292,.F.);
#7431=ORIENTED_EDGE('',*,*,#5238,.F.);
#7432=ORIENTED_EDGE('',*,*,#5240,.F.);
#7433=ORIENTED_EDGE('',*,*,#5407,.T.);
#7434=ORIENTED_EDGE('',*,*,#5225,.T.);
#7435=ORIENTED_EDGE('',*,*,#5269,.F.);
#7436=ORIENTED_EDGE('',*,*,#5256,.T.);
#7437=ORIENTED_EDGE('',*,*,#5245,.F.);
#7438=ORIENTED_EDGE('',*,*,#5242,.F.);
#7439=ORIENTED_EDGE('',*,*,#5268,.F.);
#7440=ORIENTED_EDGE('',*,*,#5223,.F.);
#7441=ORIENTED_EDGE('',*,*,#5407,.F.);
#7442=ORIENTED_EDGE('',*,*,#5247,.F.);
#7443=ORIENTED_EDGE('',*,*,#5250,.F.);
#7444=ORIENTED_EDGE('',*,*,#5228,.F.);
#7445=ORIENTED_EDGE('',*,*,#5255,.F.);
#7446=ORIENTED_EDGE('',*,*,#5281,.F.);
#7447=ORIENTED_EDGE('',*,*,#5279,.F.);
#7448=ORIENTED_EDGE('',*,*,#5273,.F.);
#7449=ORIENTED_EDGE('',*,*,#5294,.F.);
#7450=ORIENTED_EDGE('',*,*,#5406,.F.);
#7451=ORIENTED_EDGE('',*,*,#5399,.F.);
#7452=ORIENTED_EDGE('',*,*,#5398,.F.);
#7453=ORIENTED_EDGE('',*,*,#5404,.F.);
#7454=ORIENTED_EDGE('',*,*,#5236,.F.);
#7455=ORIENTED_EDGE('',*,*,#5234,.F.);
#7456=ORIENTED_EDGE('',*,*,#5408,.F.);
#7457=ORIENTED_EDGE('',*,*,#5204,.F.);
#7458=ORIENTED_EDGE('',*,*,#5221,.F.);
#7459=ORIENTED_EDGE('',*,*,#5270,.F.);
#7460=ORIENTED_EDGE('',*,*,#5224,.F.);
#7461=ORIENTED_EDGE('',*,*,#5212,.F.);
#7462=ORIENTED_EDGE('',*,*,#5409,.F.);
#7463=ORIENTED_EDGE('',*,*,#5187,.F.);
#7464=ORIENTED_EDGE('',*,*,#5192,.F.);
#7465=ORIENTED_EDGE('',*,*,#5298,.F.);
#7466=ORIENTED_EDGE('',*,*,#5195,.F.);
#7467=ORIENTED_EDGE('',*,*,#5177,.F.);
#7468=ORIENTED_EDGE('',*,*,#5409,.T.);
#7469=ORIENTED_EDGE('',*,*,#5176,.F.);
#7470=ORIENTED_EDGE('',*,*,#5377,.F.);
#7471=ORIENTED_EDGE('',*,*,#5205,.F.);
#7472=ORIENTED_EDGE('',*,*,#5408,.T.);
#7473=ORIENTED_EDGE('',*,*,#5211,.F.);
#7474=ORIENTED_EDGE('',*,*,#5343,.F.);
#7475=ORIENTED_EDGE('',*,*,#5325,.F.);
#7476=ORIENTED_EDGE('',*,*,#5338,.F.);
#7477=ORIENTED_EDGE('',*,*,#5340,.F.);
#7478=ORIENTED_EDGE('',*,*,#5410,.F.);
#7479=ORIENTED_EDGE('',*,*,#5358,.F.);
#7480=ORIENTED_EDGE('',*,*,#5356,.F.);
#7481=ORIENTED_EDGE('',*,*,#5302,.F.);
#7482=ORIENTED_EDGE('',*,*,#5352,.F.);
#7483=ORIENTED_EDGE('',*,*,#5188,.F.);
#7484=ORIENTED_EDGE('',*,*,#5411,.T.);
#7485=ORIENTED_EDGE('',*,*,#5412,.F.);
#7486=ORIENTED_EDGE('',*,*,#5125,.F.);
#7487=ORIENTED_EDGE('',*,*,#5349,.F.);
#7488=ORIENTED_EDGE('',*,*,#5413,.F.);
#7489=ORIENTED_EDGE('',*,*,#5414,.T.);
#7490=ORIENTED_EDGE('',*,*,#5415,.T.);
#7491=ORIENTED_EDGE('',*,*,#5416,.F.);
#7492=ORIENTED_EDGE('',*,*,#5417,.F.);
#7493=ORIENTED_EDGE('',*,*,#5418,.T.);
#7494=ORIENTED_EDGE('',*,*,#5419,.T.);
#7495=ORIENTED_EDGE('',*,*,#5420,.F.);
#7496=ORIENTED_EDGE('',*,*,#5421,.F.);
#7497=ORIENTED_EDGE('',*,*,#5422,.F.);
#7498=ORIENTED_EDGE('',*,*,#5423,.T.);
#7499=ORIENTED_EDGE('',*,*,#5424,.F.);
#7500=ORIENTED_EDGE('',*,*,#5425,.F.);
#7501=ORIENTED_EDGE('',*,*,#5426,.F.);
#7502=ORIENTED_EDGE('',*,*,#5427,.F.);
#7503=ORIENTED_EDGE('',*,*,#5411,.F.);
#7504=ORIENTED_EDGE('',*,*,#5348,.T.);
#7505=ORIENTED_EDGE('',*,*,#5371,.F.);
#7506=ORIENTED_EDGE('',*,*,#5428,.T.);
#7507=ORIENTED_EDGE('',*,*,#5414,.F.);
#7508=ORIENTED_EDGE('',*,*,#5413,.T.);
#7509=ORIENTED_EDGE('',*,*,#5381,.T.);
#7510=ORIENTED_EDGE('',*,*,#5161,.T.);
#7511=ORIENTED_EDGE('',*,*,#5429,.F.);
#7512=ORIENTED_EDGE('',*,*,#5428,.F.);
#7513=ORIENTED_EDGE('',*,*,#5380,.F.);
#7514=ORIENTED_EDGE('',*,*,#5430,.F.);
#7515=ORIENTED_EDGE('',*,*,#5431,.T.);
#7516=ORIENTED_EDGE('',*,*,#5432,.T.);
#7517=ORIENTED_EDGE('',*,*,#5433,.F.);
#7518=ORIENTED_EDGE('',*,*,#5434,.F.);
#7519=ORIENTED_EDGE('',*,*,#5435,.T.);
#7520=ORIENTED_EDGE('',*,*,#5430,.T.);
#7521=ORIENTED_EDGE('',*,*,#5436,.F.);
#7522=ORIENTED_EDGE('',*,*,#5437,.F.);
#7523=ORIENTED_EDGE('',*,*,#5438,.T.);
#7524=ORIENTED_EDGE('',*,*,#5434,.T.);
#7525=ORIENTED_EDGE('',*,*,#5439,.F.);
#7526=ORIENTED_EDGE('',*,*,#4768,.F.);
#7527=ORIENTED_EDGE('',*,*,#4773,.T.);
#7528=ORIENTED_EDGE('',*,*,#5440,.F.);
#7529=ORIENTED_EDGE('',*,*,#5441,.F.);
#7530=ORIENTED_EDGE('',*,*,#5442,.T.);
#7531=ORIENTED_EDGE('',*,*,#5443,.T.);
#7532=ORIENTED_EDGE('',*,*,#5444,.T.);
#7533=ORIENTED_EDGE('',*,*,#5445,.T.);
#7534=ORIENTED_EDGE('',*,*,#5446,.T.);
#7535=ORIENTED_EDGE('',*,*,#5447,.T.);
#7536=ORIENTED_EDGE('',*,*,#5448,.T.);
#7537=ORIENTED_EDGE('',*,*,#5445,.F.);
#7538=ORIENTED_EDGE('',*,*,#5449,.T.);
#7539=ORIENTED_EDGE('',*,*,#5450,.T.);
#7540=ORIENTED_EDGE('',*,*,#5451,.T.);
#7541=ORIENTED_EDGE('',*,*,#5452,.T.);
#7542=ORIENTED_EDGE('',*,*,#5453,.T.);
#7543=ORIENTED_EDGE('',*,*,#5454,.T.);
#7544=ORIENTED_EDGE('',*,*,#5449,.F.);
#7545=ORIENTED_EDGE('',*,*,#5455,.T.);
#7546=ORIENTED_EDGE('',*,*,#5456,.T.);
#7547=ORIENTED_EDGE('',*,*,#5453,.F.);
#7548=ORIENTED_EDGE('',*,*,#5457,.T.);
#7549=ORIENTED_EDGE('',*,*,#5447,.F.);
#7550=ORIENTED_EDGE('',*,*,#5458,.T.);
#7551=ORIENTED_EDGE('',*,*,#5459,.T.);
#7552=ORIENTED_EDGE('',*,*,#5443,.F.);
#7553=ORIENTED_EDGE('',*,*,#5460,.T.);
#7554=ORIENTED_EDGE('',*,*,#5461,.T.);
#7555=ORIENTED_EDGE('',*,*,#5462,.T.);
#7556=ORIENTED_EDGE('',*,*,#5458,.F.);
#7557=ORIENTED_EDGE('',*,*,#5463,.T.);
#7558=ORIENTED_EDGE('',*,*,#5463,.F.);
#7559=ORIENTED_EDGE('',*,*,#5460,.F.);
#7560=ORIENTED_EDGE('',*,*,#5442,.F.);
#7561=ORIENTED_EDGE('',*,*,#5464,.F.);
#7562=ORIENTED_EDGE('',*,*,#5465,.T.);
#7563=ORIENTED_EDGE('',*,*,#5466,.T.);
#7564=ORIENTED_EDGE('',*,*,#5448,.F.);
#7565=ORIENTED_EDGE('',*,*,#5467,.T.);
#7566=ORIENTED_EDGE('',*,*,#5468,.T.);
#7567=ORIENTED_EDGE('',*,*,#5464,.T.);
#7568=ORIENTED_EDGE('',*,*,#5457,.F.);
#7569=ORIENTED_EDGE('',*,*,#5455,.F.);
#7570=ORIENTED_EDGE('',*,*,#5452,.F.);
#7571=ORIENTED_EDGE('',*,*,#5469,.T.);
#7572=ORIENTED_EDGE('',*,*,#5470,.F.);
#7573=ORIENTED_EDGE('',*,*,#5467,.F.);
#7574=ORIENTED_EDGE('',*,*,#5471,.T.);
#7575=ORIENTED_EDGE('',*,*,#5472,.T.);
#7576=ORIENTED_EDGE('',*,*,#5473,.T.);
#7577=ORIENTED_EDGE('',*,*,#5474,.T.);
#7578=ORIENTED_EDGE('',*,*,#5475,.T.);
#7579=ORIENTED_EDGE('',*,*,#5476,.T.);
#7580=ORIENTED_EDGE('',*,*,#5472,.F.);
#7581=ORIENTED_EDGE('',*,*,#5477,.T.);
#7582=ORIENTED_EDGE('',*,*,#5478,.T.);
#7583=ORIENTED_EDGE('',*,*,#5479,.T.);
#7584=ORIENTED_EDGE('',*,*,#5475,.F.);
#7585=ORIENTED_EDGE('',*,*,#5480,.T.);
#7586=ORIENTED_EDGE('',*,*,#5481,.T.);
#7587=ORIENTED_EDGE('',*,*,#5474,.F.);
#7588=ORIENTED_EDGE('',*,*,#5482,.T.);
#7589=ORIENTED_EDGE('',*,*,#5483,.T.);
#7590=ORIENTED_EDGE('',*,*,#5484,.T.);
#7591=ORIENTED_EDGE('',*,*,#5485,.T.);
#7592=ORIENTED_EDGE('',*,*,#5486,.T.);
#7593=ORIENTED_EDGE('',*,*,#5487,.T.);
#7594=ORIENTED_EDGE('',*,*,#5488,.T.);
#7595=ORIENTED_EDGE('',*,*,#5489,.T.);
#7596=ORIENTED_EDGE('',*,*,#5484,.F.);
#7597=ORIENTED_EDGE('',*,*,#5490,.T.);
#7598=ORIENTED_EDGE('',*,*,#5491,.T.);
#7599=ORIENTED_EDGE('',*,*,#5488,.F.);
#7600=ORIENTED_EDGE('',*,*,#5492,.T.);
#7601=ORIENTED_EDGE('',*,*,#5483,.F.);
#7602=ORIENTED_EDGE('',*,*,#5480,.F.);
#7603=ORIENTED_EDGE('',*,*,#5477,.F.);
#7604=ORIENTED_EDGE('',*,*,#5471,.F.);
#7605=ORIENTED_EDGE('',*,*,#5493,.F.);
#7606=ORIENTED_EDGE('',*,*,#5494,.T.);
#7607=ORIENTED_EDGE('',*,*,#5495,.T.);
#7608=ORIENTED_EDGE('',*,*,#5481,.F.);
#7609=ORIENTED_EDGE('',*,*,#5496,.T.);
#7610=ORIENTED_EDGE('',*,*,#5497,.T.);
#7611=ORIENTED_EDGE('',*,*,#5493,.T.);
#7612=ORIENTED_EDGE('',*,*,#5492,.F.);
#7613=ORIENTED_EDGE('',*,*,#5490,.F.);
#7614=ORIENTED_EDGE('',*,*,#5487,.F.);
#7615=ORIENTED_EDGE('',*,*,#5498,.T.);
#7616=ORIENTED_EDGE('',*,*,#5499,.F.);
#7617=ORIENTED_EDGE('',*,*,#5496,.F.);
#7618=ORIENTED_EDGE('',*,*,#5500,.T.);
#7619=ORIENTED_EDGE('',*,*,#5501,.T.);
#7620=ORIENTED_EDGE('',*,*,#5502,.T.);
#7621=ORIENTED_EDGE('',*,*,#5503,.T.);
#7622=ORIENTED_EDGE('',*,*,#5504,.T.);
#7623=ORIENTED_EDGE('',*,*,#5505,.T.);
#7624=ORIENTED_EDGE('',*,*,#5501,.F.);
#7625=ORIENTED_EDGE('',*,*,#5506,.T.);
#7626=ORIENTED_EDGE('',*,*,#5507,.T.);
#7627=ORIENTED_EDGE('',*,*,#5503,.F.);
#7628=ORIENTED_EDGE('',*,*,#5508,.T.);
#7629=ORIENTED_EDGE('',*,*,#5509,.T.);
#7630=ORIENTED_EDGE('',*,*,#5510,.T.);
#7631=ORIENTED_EDGE('',*,*,#5511,.T.);
#7632=ORIENTED_EDGE('',*,*,#5512,.T.);
#7633=ORIENTED_EDGE('',*,*,#5509,.F.);
#7634=ORIENTED_EDGE('',*,*,#5513,.T.);
#7635=ORIENTED_EDGE('',*,*,#5514,.T.);
#7636=ORIENTED_EDGE('',*,*,#5511,.F.);
#7637=ORIENTED_EDGE('',*,*,#5515,.T.);
#7638=ORIENTED_EDGE('',*,*,#5516,.T.);
#7639=ORIENTED_EDGE('',*,*,#5517,.T.);
#7640=ORIENTED_EDGE('',*,*,#5518,.T.);
#7641=ORIENTED_EDGE('',*,*,#5504,.F.);
#7642=ORIENTED_EDGE('',*,*,#5519,.T.);
#7643=ORIENTED_EDGE('',*,*,#5520,.T.);
#7644=ORIENTED_EDGE('',*,*,#5517,.F.);
#7645=ORIENTED_EDGE('',*,*,#5521,.T.);
#7646=ORIENTED_EDGE('',*,*,#5513,.F.);
#7647=ORIENTED_EDGE('',*,*,#5522,.T.);
#7648=ORIENTED_EDGE('',*,*,#5523,.T.);
#7649=ORIENTED_EDGE('',*,*,#5524,.T.);
#7650=ORIENTED_EDGE('',*,*,#5523,.F.);
#7651=ORIENTED_EDGE('',*,*,#5525,.T.);
#7652=ORIENTED_EDGE('',*,*,#5505,.F.);
#7653=ORIENTED_EDGE('',*,*,#5518,.F.);
#7654=ORIENTED_EDGE('',*,*,#5526,.T.);
#7655=ORIENTED_EDGE('',*,*,#5527,.F.);
#7656=ORIENTED_EDGE('',*,*,#5528,.F.);
#7657=ORIENTED_EDGE('',*,*,#5529,.T.);
#7658=ORIENTED_EDGE('',*,*,#5520,.F.);
#7659=ORIENTED_EDGE('',*,*,#5530,.F.);
#7660=ORIENTED_EDGE('',*,*,#5525,.F.);
#7661=ORIENTED_EDGE('',*,*,#5531,.F.);
#7662=ORIENTED_EDGE('',*,*,#5532,.F.);
#7663=ORIENTED_EDGE('',*,*,#5533,.F.);
#7664=ORIENTED_EDGE('',*,*,#5534,.F.);
#7665=ORIENTED_EDGE('',*,*,#5535,.F.);
#7666=ORIENTED_EDGE('',*,*,#5536,.F.);
#7667=ORIENTED_EDGE('',*,*,#5537,.F.);
#7668=ORIENTED_EDGE('',*,*,#5538,.F.);
#7669=ORIENTED_EDGE('',*,*,#5539,.F.);
#7670=ORIENTED_EDGE('',*,*,#5540,.F.);
#7671=ORIENTED_EDGE('',*,*,#5526,.F.);
#7672=ORIENTED_EDGE('',*,*,#5541,.F.);
#7673=ORIENTED_EDGE('',*,*,#5494,.F.);
#7674=ORIENTED_EDGE('',*,*,#5542,.T.);
#7675=ORIENTED_EDGE('',*,*,#5506,.F.);
#7676=ORIENTED_EDGE('',*,*,#5500,.F.);
#7677=ORIENTED_EDGE('',*,*,#5507,.F.);
#7678=ORIENTED_EDGE('',*,*,#5543,.T.);
#7679=ORIENTED_EDGE('',*,*,#5544,.T.);
#7680=ORIENTED_EDGE('',*,*,#5541,.T.);
#7681=ORIENTED_EDGE('',*,*,#5545,.T.);
#7682=ORIENTED_EDGE('',*,*,#5546,.T.);
#7683=ORIENTED_EDGE('',*,*,#5547,.T.);
#7684=ORIENTED_EDGE('',*,*,#5548,.T.);
#7685=ORIENTED_EDGE('',*,*,#5549,.T.);
#7686=ORIENTED_EDGE('',*,*,#5550,.T.);
#7687=ORIENTED_EDGE('',*,*,#5546,.F.);
#7688=ORIENTED_EDGE('',*,*,#5551,.T.);
#7689=ORIENTED_EDGE('',*,*,#5552,.T.);
#7690=ORIENTED_EDGE('',*,*,#5548,.F.);
#7691=ORIENTED_EDGE('',*,*,#5553,.T.);
#7692=ORIENTED_EDGE('',*,*,#5554,.T.);
#7693=ORIENTED_EDGE('',*,*,#5555,.T.);
#7694=ORIENTED_EDGE('',*,*,#5556,.T.);
#7695=ORIENTED_EDGE('',*,*,#5557,.T.);
#7696=ORIENTED_EDGE('',*,*,#5554,.F.);
#7697=ORIENTED_EDGE('',*,*,#5558,.T.);
#7698=ORIENTED_EDGE('',*,*,#5559,.T.);
#7699=ORIENTED_EDGE('',*,*,#5556,.F.);
#7700=ORIENTED_EDGE('',*,*,#5528,.T.);
#7701=ORIENTED_EDGE('',*,*,#5560,.T.);
#7702=ORIENTED_EDGE('',*,*,#5561,.T.);
#7703=ORIENTED_EDGE('',*,*,#5562,.T.);
#7704=ORIENTED_EDGE('',*,*,#5549,.F.);
#7705=ORIENTED_EDGE('',*,*,#5563,.T.);
#7706=ORIENTED_EDGE('',*,*,#5538,.T.);
#7707=ORIENTED_EDGE('',*,*,#5561,.F.);
#7708=ORIENTED_EDGE('',*,*,#5564,.T.);
#7709=ORIENTED_EDGE('',*,*,#5558,.F.);
#7710=ORIENTED_EDGE('',*,*,#5527,.T.);
#7711=ORIENTED_EDGE('',*,*,#5565,.T.);
#7712=ORIENTED_EDGE('',*,*,#5566,.T.);
#7713=ORIENTED_EDGE('',*,*,#5565,.F.);
#7714=ORIENTED_EDGE('',*,*,#5540,.T.);
#7715=ORIENTED_EDGE('',*,*,#5550,.F.);
#7716=ORIENTED_EDGE('',*,*,#5562,.F.);
#7717=ORIENTED_EDGE('',*,*,#5537,.T.);
#7718=ORIENTED_EDGE('',*,*,#5567,.T.);
#7719=ORIENTED_EDGE('',*,*,#5568,.T.);
#7720=ORIENTED_EDGE('',*,*,#5569,.F.);
#7721=ORIENTED_EDGE('',*,*,#5465,.F.);
#7722=ORIENTED_EDGE('',*,*,#5570,.T.);
#7723=ORIENTED_EDGE('',*,*,#5551,.F.);
#7724=ORIENTED_EDGE('',*,*,#5545,.F.);
#7725=ORIENTED_EDGE('',*,*,#5552,.F.);
#7726=ORIENTED_EDGE('',*,*,#5571,.T.);
#7727=ORIENTED_EDGE('',*,*,#5572,.T.);
#7728=ORIENTED_EDGE('',*,*,#5569,.T.);
#7729=ORIENTED_EDGE('',*,*,#5573,.F.);
#7730=ORIENTED_EDGE('',*,*,#5574,.F.);
#7731=ORIENTED_EDGE('',*,*,#5575,.F.);
#7732=ORIENTED_EDGE('',*,*,#5576,.T.);
#7733=ORIENTED_EDGE('',*,*,#5577,.F.);
#7734=ORIENTED_EDGE('',*,*,#5578,.F.);
#7735=ORIENTED_EDGE('',*,*,#5579,.F.);
#7736=ORIENTED_EDGE('',*,*,#5580,.F.);
#7737=ORIENTED_EDGE('',*,*,#5581,.F.);
#7738=ORIENTED_EDGE('',*,*,#5582,.F.);
#7739=ORIENTED_EDGE('',*,*,#5583,.F.);
#7740=ORIENTED_EDGE('',*,*,#5584,.F.);
#7741=ORIENTED_EDGE('',*,*,#5585,.F.);
#7742=ORIENTED_EDGE('',*,*,#5586,.T.);
#7743=ORIENTED_EDGE('',*,*,#5535,.T.);
#7744=ORIENTED_EDGE('',*,*,#5584,.T.);
#7745=ORIENTED_EDGE('',*,*,#5587,.T.);
#7746=ORIENTED_EDGE('',*,*,#5580,.T.);
#7747=ORIENTED_EDGE('',*,*,#5588,.T.);
#7748=ORIENTED_EDGE('',*,*,#5589,.T.);
#7749=ORIENTED_EDGE('',*,*,#5590,.T.);
#7750=ORIENTED_EDGE('',*,*,#5591,.F.);
#7751=ORIENTED_EDGE('',*,*,#5592,.F.);
#7752=ORIENTED_EDGE('',*,*,#5593,.F.);
#7753=ORIENTED_EDGE('',*,*,#5594,.F.);
#7754=ORIENTED_EDGE('',*,*,#5595,.F.);
#7755=ORIENTED_EDGE('',*,*,#5596,.F.);
#7756=ORIENTED_EDGE('',*,*,#5579,.T.);
#7757=ORIENTED_EDGE('',*,*,#5597,.F.);
#7758=ORIENTED_EDGE('',*,*,#5595,.T.);
#7759=ORIENTED_EDGE('',*,*,#5598,.T.);
#7760=ORIENTED_EDGE('',*,*,#5599,.F.);
#7761=ORIENTED_EDGE('',*,*,#5600,.T.);
#7762=ORIENTED_EDGE('',*,*,#5601,.T.);
#7763=ORIENTED_EDGE('',*,*,#5602,.T.);
#7764=ORIENTED_EDGE('',*,*,#5603,.F.);
#7765=ORIENTED_EDGE('',*,*,#5593,.T.);
#7766=ORIENTED_EDGE('',*,*,#5604,.F.);
#7767=ORIENTED_EDGE('',*,*,#5601,.F.);
#7768=ORIENTED_EDGE('',*,*,#5605,.T.);
#7769=ORIENTED_EDGE('',*,*,#5606,.F.);
#7770=ORIENTED_EDGE('',*,*,#5607,.F.);
#7771=ORIENTED_EDGE('',*,*,#5608,.F.);
#7772=ORIENTED_EDGE('',*,*,#5609,.T.);
#7773=ORIENTED_EDGE('',*,*,#5610,.F.);
#7774=ORIENTED_EDGE('',*,*,#5611,.F.);
#7775=ORIENTED_EDGE('',*,*,#5612,.F.);
#7776=ORIENTED_EDGE('',*,*,#5613,.T.);
#7777=ORIENTED_EDGE('',*,*,#5614,.T.);
#7778=ORIENTED_EDGE('',*,*,#5594,.T.);
#7779=ORIENTED_EDGE('',*,*,#5615,.T.);
#7780=ORIENTED_EDGE('',*,*,#5611,.T.);
#7781=ORIENTED_EDGE('',*,*,#5533,.T.);
#7782=ORIENTED_EDGE('',*,*,#5616,.T.);
#7783=ORIENTED_EDGE('',*,*,#5617,.T.);
#7784=ORIENTED_EDGE('',*,*,#5607,.T.);
#7785=ORIENTED_EDGE('',*,*,#5618,.T.);
#7786=ORIENTED_EDGE('',*,*,#5612,.T.);
#7787=ORIENTED_EDGE('',*,*,#5619,.T.);
#7788=ORIENTED_EDGE('',*,*,#5610,.T.);
#7789=ORIENTED_EDGE('',*,*,#5620,.T.);
#7790=ORIENTED_EDGE('',*,*,#5585,.T.);
#7791=ORIENTED_EDGE('',*,*,#5534,.T.);
#7792=ORIENTED_EDGE('',*,*,#5621,.T.);
#7793=ORIENTED_EDGE('',*,*,#5622,.T.);
#7794=ORIENTED_EDGE('',*,*,#5608,.T.);
#7795=ORIENTED_EDGE('',*,*,#5623,.T.);
#7796=ORIENTED_EDGE('',*,*,#5624,.F.);
#7797=ORIENTED_EDGE('',*,*,#5625,.T.);
#7798=ORIENTED_EDGE('',*,*,#5621,.F.);
#7799=ORIENTED_EDGE('',*,*,#5626,.T.);
#7800=ORIENTED_EDGE('',*,*,#5489,.F.);
#7801=ORIENTED_EDGE('',*,*,#5627,.T.);
#7802=ORIENTED_EDGE('',*,*,#5606,.T.);
#7803=ORIENTED_EDGE('',*,*,#5628,.T.);
#7804=ORIENTED_EDGE('',*,*,#5574,.T.);
#7805=ORIENTED_EDGE('',*,*,#5629,.T.);
#7806=ORIENTED_EDGE('',*,*,#5583,.T.);
#7807=ORIENTED_EDGE('',*,*,#5630,.T.);
#7808=ORIENTED_EDGE('',*,*,#5631,.T.);
#7809=ORIENTED_EDGE('',*,*,#5632,.F.);
#7810=ORIENTED_EDGE('',*,*,#5581,.T.);
#7811=ORIENTED_EDGE('',*,*,#5633,.T.);
#7812=ORIENTED_EDGE('',*,*,#5138,.F.);
#7813=ORIENTED_EDGE('',*,*,#5634,.T.);
#7814=ORIENTED_EDGE('',*,*,#5631,.F.);
#7815=ORIENTED_EDGE('',*,*,#5635,.T.);
#7816=ORIENTED_EDGE('',*,*,#5636,.F.);
#7817=ORIENTED_EDGE('',*,*,#5459,.F.);
#7818=ORIENTED_EDGE('',*,*,#5637,.T.);
#7819=ORIENTED_EDGE('',*,*,#5575,.T.);
#7820=ORIENTED_EDGE('',*,*,#5638,.T.);
#7821=ORIENTED_EDGE('',*,*,#5639,.T.);
#7822=ORIENTED_EDGE('',*,*,#5640,.T.);
#7823=ORIENTED_EDGE('',*,*,#5573,.T.);
#7824=ORIENTED_EDGE('',*,*,#5641,.T.);
#7825=ORIENTED_EDGE('',*,*,#5642,.F.);
#7826=ORIENTED_EDGE('',*,*,#5643,.T.);
#7827=ORIENTED_EDGE('',*,*,#5639,.F.);
#7828=ORIENTED_EDGE('',*,*,#5644,.T.);
#7829=ORIENTED_EDGE('',*,*,#5613,.F.);
#7830=ORIENTED_EDGE('',*,*,#5645,.F.);
#7831=ORIENTED_EDGE('',*,*,#4772,.F.);
#7832=ORIENTED_EDGE('',*,*,#5646,.F.);
#7833=ORIENTED_EDGE('',*,*,#5647,.T.);
#7834=ORIENTED_EDGE('',*,*,#5617,.F.);
#7835=ORIENTED_EDGE('',*,*,#5648,.T.);
#7836=ORIENTED_EDGE('',*,*,#5440,.T.);
#7837=ORIENTED_EDGE('',*,*,#5645,.T.);
#7838=ORIENTED_EDGE('',*,*,#5588,.F.);
#7839=ORIENTED_EDGE('',*,*,#5598,.F.);
#7840=ORIENTED_EDGE('',*,*,#5614,.F.);
#7841=ORIENTED_EDGE('',*,*,#5647,.F.);
#7842=ORIENTED_EDGE('',*,*,#5649,.F.);
#7843=ORIENTED_EDGE('',*,*,#5650,.F.);
#7844=ORIENTED_EDGE('',*,*,#5616,.F.);
#7845=ORIENTED_EDGE('',*,*,#5532,.T.);
#7846=ORIENTED_EDGE('',*,*,#5651,.F.);
#7847=ORIENTED_EDGE('',*,*,#5652,.F.);
#7848=ORIENTED_EDGE('',*,*,#5648,.F.);
#7849=ORIENTED_EDGE('',*,*,#5599,.T.);
#7850=ORIENTED_EDGE('',*,*,#5653,.T.);
#7851=ORIENTED_EDGE('',*,*,#5654,.T.);
#7852=ORIENTED_EDGE('',*,*,#5655,.T.);
#7853=ORIENTED_EDGE('',*,*,#5636,.T.);
#7854=ORIENTED_EDGE('',*,*,#5656,.T.);
#7855=ORIENTED_EDGE('',*,*,#5657,.F.);
#7856=ORIENTED_EDGE('',*,*,#5139,.T.);
#7857=ORIENTED_EDGE('',*,*,#5635,.F.);
#7858=ORIENTED_EDGE('',*,*,#5633,.F.);
#7859=ORIENTED_EDGE('',*,*,#5587,.F.);
#7860=ORIENTED_EDGE('',*,*,#5629,.F.);
#7861=ORIENTED_EDGE('',*,*,#5640,.F.);
#7862=ORIENTED_EDGE('',*,*,#5658,.F.);
#7863=ORIENTED_EDGE('',*,*,#5659,.F.);
#7864=ORIENTED_EDGE('',*,*,#5660,.F.);
#7865=ORIENTED_EDGE('',*,*,#5656,.F.);
#7866=ORIENTED_EDGE('',*,*,#5643,.F.);
#7867=ORIENTED_EDGE('',*,*,#5661,.F.);
#7868=ORIENTED_EDGE('',*,*,#5662,.T.);
#7869=ORIENTED_EDGE('',*,*,#5658,.T.);
#7870=ORIENTED_EDGE('',*,*,#5454,.F.);
#7871=ORIENTED_EDGE('',*,*,#5663,.T.);
#7872=ORIENTED_EDGE('',*,*,#5476,.F.);
#7873=ORIENTED_EDGE('',*,*,#5664,.T.);
#7874=ORIENTED_EDGE('',*,*,#5444,.F.);
#7875=ORIENTED_EDGE('',*,*,#5638,.F.);
#7876=ORIENTED_EDGE('',*,*,#5630,.F.);
#7877=ORIENTED_EDGE('',*,*,#5620,.F.);
#7878=ORIENTED_EDGE('',*,*,#5618,.F.);
#7879=ORIENTED_EDGE('',*,*,#5627,.F.);
#7880=ORIENTED_EDGE('',*,*,#5491,.F.);
#7881=ORIENTED_EDGE('',*,*,#5482,.F.);
#7882=ORIENTED_EDGE('',*,*,#5473,.F.);
#7883=ORIENTED_EDGE('',*,*,#5663,.F.);
#7884=ORIENTED_EDGE('',*,*,#5456,.F.);
#7885=ORIENTED_EDGE('',*,*,#5446,.F.);
#7886=ORIENTED_EDGE('',*,*,#5557,.F.);
#7887=ORIENTED_EDGE('',*,*,#5559,.F.);
#7888=ORIENTED_EDGE('',*,*,#5665,.T.);
#7889=ORIENTED_EDGE('',*,*,#5470,.T.);
#7890=ORIENTED_EDGE('',*,*,#5571,.F.);
#7891=ORIENTED_EDGE('',*,*,#5666,.T.);
#7892=ORIENTED_EDGE('',*,*,#5659,.T.);
#7893=ORIENTED_EDGE('',*,*,#5662,.F.);
#7894=ORIENTED_EDGE('',*,*,#5667,.T.);
#7895=ORIENTED_EDGE('',*,*,#5657,.T.);
#7896=ORIENTED_EDGE('',*,*,#5660,.T.);
#7897=ORIENTED_EDGE('',*,*,#5666,.F.);
#7898=ORIENTED_EDGE('',*,*,#5668,.F.);
#7899=ORIENTED_EDGE('',*,*,#5626,.F.);
#7900=ORIENTED_EDGE('',*,*,#5669,.T.);
#7901=ORIENTED_EDGE('',*,*,#5670,.T.);
#7902=ORIENTED_EDGE('',*,*,#5671,.T.);
#7903=ORIENTED_EDGE('',*,*,#5672,.T.);
#7904=ORIENTED_EDGE('',*,*,#5673,.T.);
#7905=ORIENTED_EDGE('',*,*,#5670,.F.);
#7906=ORIENTED_EDGE('',*,*,#5674,.T.);
#7907=ORIENTED_EDGE('',*,*,#5654,.F.);
#7908=ORIENTED_EDGE('',*,*,#5675,.F.);
#7909=ORIENTED_EDGE('',*,*,#5672,.F.);
#7910=ORIENTED_EDGE('',*,*,#5676,.T.);
#7911=ORIENTED_EDGE('',*,*,#5600,.F.);
#7912=ORIENTED_EDGE('',*,*,#5655,.F.);
#7913=ORIENTED_EDGE('',*,*,#5676,.F.);
#7914=ORIENTED_EDGE('',*,*,#5674,.F.);
#7915=ORIENTED_EDGE('',*,*,#5669,.F.);
#7916=ORIENTED_EDGE('',*,*,#5623,.F.);
#7917=ORIENTED_EDGE('',*,*,#5619,.F.);
#7918=ORIENTED_EDGE('',*,*,#5615,.F.);
#7919=ORIENTED_EDGE('',*,*,#5605,.F.);
#7920=ORIENTED_EDGE('',*,*,#5586,.F.);
#7921=ORIENTED_EDGE('',*,*,#5677,.F.);
#7922=ORIENTED_EDGE('',*,*,#5678,.F.);
#7923=ORIENTED_EDGE('',*,*,#5567,.F.);
#7924=ORIENTED_EDGE('',*,*,#5536,.T.);
#7925=ORIENTED_EDGE('',*,*,#5679,.F.);
#7926=ORIENTED_EDGE('',*,*,#5680,.F.);
#7927=ORIENTED_EDGE('',*,*,#5681,.T.);
#7928=ORIENTED_EDGE('',*,*,#5682,.F.);
#7929=ORIENTED_EDGE('',*,*,#5589,.F.);
#7930=ORIENTED_EDGE('',*,*,#5650,.T.);
#7931=ORIENTED_EDGE('',*,*,#5683,.F.);
#7932=ORIENTED_EDGE('',*,*,#4777,.F.);
#7933=ORIENTED_EDGE('',*,*,#5684,.F.);
#7934=ORIENTED_EDGE('',*,*,#5685,.T.);
#7935=ORIENTED_EDGE('',*,*,#4769,.F.);
#7936=ORIENTED_EDGE('',*,*,#5686,.F.);
#7937=ORIENTED_EDGE('',*,*,#5687,.F.);
#7938=ORIENTED_EDGE('',*,*,#5683,.T.);
#7939=ORIENTED_EDGE('',*,*,#5649,.T.);
#7940=ORIENTED_EDGE('',*,*,#5646,.T.);
#7941=ORIENTED_EDGE('',*,*,#4775,.T.);
#7942=ORIENTED_EDGE('',*,*,#5652,.T.);
#7943=ORIENTED_EDGE('',*,*,#5688,.T.);
#7944=ORIENTED_EDGE('',*,*,#5686,.T.);
#7945=ORIENTED_EDGE('',*,*,#5441,.T.);
#7946=ORIENTED_EDGE('',*,*,#5687,.T.);
#7947=ORIENTED_EDGE('',*,*,#5689,.T.);
#7948=ORIENTED_EDGE('',*,*,#5682,.T.);
#7949=ORIENTED_EDGE('',*,*,#5690,.T.);
#7950=ORIENTED_EDGE('',*,*,#4758,.F.);
#7951=ORIENTED_EDGE('',*,*,#5691,.T.);
#7952=ORIENTED_EDGE('',*,*,#5680,.T.);
#7953=ORIENTED_EDGE('',*,*,#5692,.T.);
#7954=ORIENTED_EDGE('',*,*,#5590,.F.);
#7955=ORIENTED_EDGE('',*,*,#5684,.T.);
#7956=ORIENTED_EDGE('',*,*,#5693,.T.);
#7957=ORIENTED_EDGE('',*,*,#5677,.T.);
#7958=ORIENTED_EDGE('',*,*,#5515,.F.);
#7959=ORIENTED_EDGE('',*,*,#5694,.T.);
#7960=ORIENTED_EDGE('',*,*,#5651,.T.);
#7961=ORIENTED_EDGE('',*,*,#5531,.T.);
#7962=ORIENTED_EDGE('',*,*,#5522,.F.);
#7963=ORIENTED_EDGE('',*,*,#5678,.T.);
#7964=ORIENTED_EDGE('',*,*,#5695,.T.);
#7965=ORIENTED_EDGE('',*,*,#5679,.T.);
#7966=ORIENTED_EDGE('',*,*,#5696,.T.);
#7967=ORIENTED_EDGE('',*,*,#4766,.F.);
#7968=ORIENTED_EDGE('',*,*,#4770,.F.);
#7969=ORIENTED_EDGE('',*,*,#5685,.F.);
#7970=ORIENTED_EDGE('',*,*,#5690,.F.);
#7971=ORIENTED_EDGE('',*,*,#5681,.F.);
#7972=ORIENTED_EDGE('',*,*,#5691,.F.);
#7973=ORIENTED_EDGE('',*,*,#4761,.F.);
#7974=ORIENTED_EDGE('',*,*,#4763,.F.);
#7975=ORIENTED_EDGE('',*,*,#5692,.F.);
#7976=ORIENTED_EDGE('',*,*,#5695,.F.);
#7977=ORIENTED_EDGE('',*,*,#5693,.F.);
#7978=ORIENTED_EDGE('',*,*,#4776,.F.);
#7979=ORIENTED_EDGE('',*,*,#5539,.T.);
#7980=ORIENTED_EDGE('',*,*,#5563,.F.);
#7981=ORIENTED_EDGE('',*,*,#5560,.F.);
#7982=ORIENTED_EDGE('',*,*,#5570,.F.);
#7983=ORIENTED_EDGE('',*,*,#5468,.F.);
#7984=ORIENTED_EDGE('',*,*,#5665,.F.);
#7985=ORIENTED_EDGE('',*,*,#5564,.F.);
#7986=ORIENTED_EDGE('',*,*,#5566,.F.);
#7987=ORIENTED_EDGE('',*,*,#5512,.F.);
#7988=ORIENTED_EDGE('',*,*,#5514,.F.);
#7989=ORIENTED_EDGE('',*,*,#5697,.T.);
#7990=ORIENTED_EDGE('',*,*,#5499,.T.);
#7991=ORIENTED_EDGE('',*,*,#5543,.F.);
#7992=ORIENTED_EDGE('',*,*,#5530,.T.);
#7993=ORIENTED_EDGE('',*,*,#5519,.F.);
#7994=ORIENTED_EDGE('',*,*,#5516,.F.);
#7995=ORIENTED_EDGE('',*,*,#5542,.F.);
#7996=ORIENTED_EDGE('',*,*,#5497,.F.);
#7997=ORIENTED_EDGE('',*,*,#5697,.F.);
#7998=ORIENTED_EDGE('',*,*,#5521,.F.);
#7999=ORIENTED_EDGE('',*,*,#5524,.F.);
#8000=ORIENTED_EDGE('',*,*,#5502,.F.);
#8001=ORIENTED_EDGE('',*,*,#5529,.F.);
#8002=ORIENTED_EDGE('',*,*,#5555,.F.);
#8003=ORIENTED_EDGE('',*,*,#5553,.F.);
#8004=ORIENTED_EDGE('',*,*,#5547,.F.);
#8005=ORIENTED_EDGE('',*,*,#5568,.F.);
#8006=ORIENTED_EDGE('',*,*,#5696,.F.);
#8007=ORIENTED_EDGE('',*,*,#5689,.F.);
#8008=ORIENTED_EDGE('',*,*,#5688,.F.);
#8009=ORIENTED_EDGE('',*,*,#5694,.F.);
#8010=ORIENTED_EDGE('',*,*,#5510,.F.);
#8011=ORIENTED_EDGE('',*,*,#5508,.F.);
#8012=ORIENTED_EDGE('',*,*,#5698,.F.);
#8013=ORIENTED_EDGE('',*,*,#5478,.F.);
#8014=ORIENTED_EDGE('',*,*,#5495,.F.);
#8015=ORIENTED_EDGE('',*,*,#5544,.F.);
#8016=ORIENTED_EDGE('',*,*,#5498,.F.);
#8017=ORIENTED_EDGE('',*,*,#5486,.F.);
#8018=ORIENTED_EDGE('',*,*,#5699,.F.);
#8019=ORIENTED_EDGE('',*,*,#5461,.F.);
#8020=ORIENTED_EDGE('',*,*,#5466,.F.);
#8021=ORIENTED_EDGE('',*,*,#5572,.F.);
#8022=ORIENTED_EDGE('',*,*,#5469,.F.);
#8023=ORIENTED_EDGE('',*,*,#5451,.F.);
#8024=ORIENTED_EDGE('',*,*,#5699,.T.);
#8025=ORIENTED_EDGE('',*,*,#5450,.F.);
#8026=ORIENTED_EDGE('',*,*,#5664,.F.);
#8027=ORIENTED_EDGE('',*,*,#5479,.F.);
#8028=ORIENTED_EDGE('',*,*,#5698,.T.);
#8029=ORIENTED_EDGE('',*,*,#5485,.F.);
#8030=ORIENTED_EDGE('',*,*,#5628,.F.);
#8031=ORIENTED_EDGE('',*,*,#5609,.F.);
#8032=ORIENTED_EDGE('',*,*,#5622,.F.);
#8033=ORIENTED_EDGE('',*,*,#5625,.F.);
#8034=ORIENTED_EDGE('',*,*,#5700,.F.);
#8035=ORIENTED_EDGE('',*,*,#5644,.F.);
#8036=ORIENTED_EDGE('',*,*,#5641,.F.);
#8037=ORIENTED_EDGE('',*,*,#5576,.F.);
#8038=ORIENTED_EDGE('',*,*,#5637,.F.);
#8039=ORIENTED_EDGE('',*,*,#5462,.F.);
#8040=ORIENTED_EDGE('',*,*,#5105,.T.);
#8041=ORIENTED_EDGE('',*,*,#5701,.F.);
#8042=ORIENTED_EDGE('',*,*,#5702,.F.);
#8043=ORIENTED_EDGE('',*,*,#5703,.T.);
#8044=ORIENTED_EDGE('',*,*,#5704,.T.);
#8045=ORIENTED_EDGE('',*,*,#5705,.T.);
#8046=ORIENTED_EDGE('',*,*,#5706,.T.);
#8047=ORIENTED_EDGE('',*,*,#5707,.T.);
#8048=ORIENTED_EDGE('',*,*,#5708,.T.);
#8049=ORIENTED_EDGE('',*,*,#5709,.T.);
#8050=ORIENTED_EDGE('',*,*,#5710,.T.);
#8051=ORIENTED_EDGE('',*,*,#5711,.T.);
#8052=ORIENTED_EDGE('',*,*,#5712,.F.);
#8053=ORIENTED_EDGE('',*,*,#5604,.T.);
#8054=ORIENTED_EDGE('',*,*,#5592,.T.);
#8055=ORIENTED_EDGE('',*,*,#5591,.T.);
#8056=ORIENTED_EDGE('',*,*,#5596,.T.);
#8057=ORIENTED_EDGE('',*,*,#5597,.T.);
#8058=ORIENTED_EDGE('',*,*,#5578,.T.);
#8059=ORIENTED_EDGE('',*,*,#5577,.T.);
#8060=ORIENTED_EDGE('',*,*,#5582,.T.);
#8061=ORIENTED_EDGE('',*,*,#5632,.T.);
#8062=ORIENTED_EDGE('',*,*,#5713,.F.);
#8063=ORIENTED_EDGE('',*,*,#5714,.T.);
#8064=ORIENTED_EDGE('',*,*,#5137,.T.);
#8065=ORIENTED_EDGE('',*,*,#5715,.F.);
#8066=ORIENTED_EDGE('',*,*,#5713,.T.);
#8067=ORIENTED_EDGE('',*,*,#5634,.F.);
#8068=ORIENTED_EDGE('',*,*,#5712,.T.);
#8069=ORIENTED_EDGE('',*,*,#5716,.F.);
#8070=ORIENTED_EDGE('',*,*,#5717,.T.);
#8071=ORIENTED_EDGE('',*,*,#5602,.F.);
#8072=ORIENTED_EDGE('',*,*,#5717,.F.);
#8073=ORIENTED_EDGE('',*,*,#5718,.T.);
#8074=ORIENTED_EDGE('',*,*,#5719,.F.);
#8075=ORIENTED_EDGE('',*,*,#5720,.F.);
#8076=ORIENTED_EDGE('',*,*,#5653,.F.);
#8077=ORIENTED_EDGE('',*,*,#5603,.T.);
#8078=ORIENTED_EDGE('',*,*,#5721,.T.);
#8079=ORIENTED_EDGE('',*,*,#5141,.F.);
#8080=ORIENTED_EDGE('',*,*,#5140,.T.);
#8081=ORIENTED_EDGE('',*,*,#5668,.T.);
#8082=ORIENTED_EDGE('',*,*,#5720,.T.);
#8083=ORIENTED_EDGE('',*,*,#5722,.T.);
#8084=ORIENTED_EDGE('',*,*,#5723,.T.);
#8085=ORIENTED_EDGE('',*,*,#5675,.T.);
#8086=ORIENTED_EDGE('',*,*,#5724,.T.);
#8087=ORIENTED_EDGE('',*,*,#5725,.F.);
#8088=ORIENTED_EDGE('',*,*,#5721,.F.);
#8089=ORIENTED_EDGE('',*,*,#5667,.F.);
#8090=ORIENTED_EDGE('',*,*,#5723,.F.);
#8091=ORIENTED_EDGE('',*,*,#5726,.F.);
#8092=ORIENTED_EDGE('',*,*,#5727,.T.);
#8093=ORIENTED_EDGE('',*,*,#5673,.F.);
#8094=ORIENTED_EDGE('',*,*,#5728,.T.);
#8095=ORIENTED_EDGE('',*,*,#5729,.F.);
#8096=ORIENTED_EDGE('',*,*,#5724,.F.);
#8097=ORIENTED_EDGE('',*,*,#5661,.T.);
#8098=ORIENTED_EDGE('',*,*,#5642,.T.);
#8099=ORIENTED_EDGE('',*,*,#5730,.T.);
#8100=ORIENTED_EDGE('',*,*,#5731,.F.);
#8101=ORIENTED_EDGE('',*,*,#5732,.F.);
#8102=ORIENTED_EDGE('',*,*,#5733,.T.);
#8103=ORIENTED_EDGE('',*,*,#5734,.T.);
#8104=ORIENTED_EDGE('',*,*,#5735,.T.);
#8105=ORIENTED_EDGE('',*,*,#5624,.T.);
#8106=ORIENTED_EDGE('',*,*,#5671,.F.);
#8107=ORIENTED_EDGE('',*,*,#5727,.F.);
#8108=ORIENTED_EDGE('',*,*,#5736,.T.);
#8109=ORIENTED_EDGE('',*,*,#5737,.T.);
#8110=ORIENTED_EDGE('',*,*,#4788,.F.);
#8111=ORIENTED_EDGE('',*,*,#4793,.F.);
#8112=ORIENTED_EDGE('',*,*,#5738,.F.);
#8113=ORIENTED_EDGE('',*,*,#5739,.F.);
#8114=ORIENTED_EDGE('',*,*,#5740,.T.);
#8115=ORIENTED_EDGE('',*,*,#5741,.T.);
#8116=ORIENTED_EDGE('',*,*,#5742,.T.);
#8117=ORIENTED_EDGE('',*,*,#5743,.T.);
#8118=ORIENTED_EDGE('',*,*,#5744,.T.);
#8119=ORIENTED_EDGE('',*,*,#5745,.T.);
#8120=ORIENTED_EDGE('',*,*,#5746,.T.);
#8121=ORIENTED_EDGE('',*,*,#5743,.F.);
#8122=ORIENTED_EDGE('',*,*,#5747,.T.);
#8123=ORIENTED_EDGE('',*,*,#5748,.T.);
#8124=ORIENTED_EDGE('',*,*,#5749,.T.);
#8125=ORIENTED_EDGE('',*,*,#5750,.T.);
#8126=ORIENTED_EDGE('',*,*,#5751,.T.);
#8127=ORIENTED_EDGE('',*,*,#5752,.T.);
#8128=ORIENTED_EDGE('',*,*,#5747,.F.);
#8129=ORIENTED_EDGE('',*,*,#5753,.T.);
#8130=ORIENTED_EDGE('',*,*,#5754,.T.);
#8131=ORIENTED_EDGE('',*,*,#5751,.F.);
#8132=ORIENTED_EDGE('',*,*,#5755,.T.);
#8133=ORIENTED_EDGE('',*,*,#5745,.F.);
#8134=ORIENTED_EDGE('',*,*,#5756,.T.);
#8135=ORIENTED_EDGE('',*,*,#5757,.T.);
#8136=ORIENTED_EDGE('',*,*,#5741,.F.);
#8137=ORIENTED_EDGE('',*,*,#5758,.T.);
#8138=ORIENTED_EDGE('',*,*,#5759,.T.);
#8139=ORIENTED_EDGE('',*,*,#5760,.T.);
#8140=ORIENTED_EDGE('',*,*,#5756,.F.);
#8141=ORIENTED_EDGE('',*,*,#5761,.T.);
#8142=ORIENTED_EDGE('',*,*,#5761,.F.);
#8143=ORIENTED_EDGE('',*,*,#5758,.F.);
#8144=ORIENTED_EDGE('',*,*,#5740,.F.);
#8145=ORIENTED_EDGE('',*,*,#5762,.F.);
#8146=ORIENTED_EDGE('',*,*,#5763,.T.);
#8147=ORIENTED_EDGE('',*,*,#5764,.T.);
#8148=ORIENTED_EDGE('',*,*,#5746,.F.);
#8149=ORIENTED_EDGE('',*,*,#5765,.T.);
#8150=ORIENTED_EDGE('',*,*,#5766,.T.);
#8151=ORIENTED_EDGE('',*,*,#5762,.T.);
#8152=ORIENTED_EDGE('',*,*,#5755,.F.);
#8153=ORIENTED_EDGE('',*,*,#5753,.F.);
#8154=ORIENTED_EDGE('',*,*,#5750,.F.);
#8155=ORIENTED_EDGE('',*,*,#5767,.T.);
#8156=ORIENTED_EDGE('',*,*,#5768,.F.);
#8157=ORIENTED_EDGE('',*,*,#5765,.F.);
#8158=ORIENTED_EDGE('',*,*,#5769,.T.);
#8159=ORIENTED_EDGE('',*,*,#5770,.T.);
#8160=ORIENTED_EDGE('',*,*,#5771,.T.);
#8161=ORIENTED_EDGE('',*,*,#5772,.T.);
#8162=ORIENTED_EDGE('',*,*,#5773,.T.);
#8163=ORIENTED_EDGE('',*,*,#5774,.T.);
#8164=ORIENTED_EDGE('',*,*,#5770,.F.);
#8165=ORIENTED_EDGE('',*,*,#5775,.T.);
#8166=ORIENTED_EDGE('',*,*,#5776,.T.);
#8167=ORIENTED_EDGE('',*,*,#5777,.T.);
#8168=ORIENTED_EDGE('',*,*,#5773,.F.);
#8169=ORIENTED_EDGE('',*,*,#5778,.T.);
#8170=ORIENTED_EDGE('',*,*,#5779,.T.);
#8171=ORIENTED_EDGE('',*,*,#5772,.F.);
#8172=ORIENTED_EDGE('',*,*,#5780,.T.);
#8173=ORIENTED_EDGE('',*,*,#5781,.T.);
#8174=ORIENTED_EDGE('',*,*,#5782,.T.);
#8175=ORIENTED_EDGE('',*,*,#5783,.T.);
#8176=ORIENTED_EDGE('',*,*,#5784,.T.);
#8177=ORIENTED_EDGE('',*,*,#5785,.T.);
#8178=ORIENTED_EDGE('',*,*,#5786,.T.);
#8179=ORIENTED_EDGE('',*,*,#5787,.T.);
#8180=ORIENTED_EDGE('',*,*,#5782,.F.);
#8181=ORIENTED_EDGE('',*,*,#5788,.T.);
#8182=ORIENTED_EDGE('',*,*,#5789,.T.);
#8183=ORIENTED_EDGE('',*,*,#5786,.F.);
#8184=ORIENTED_EDGE('',*,*,#5790,.T.);
#8185=ORIENTED_EDGE('',*,*,#5781,.F.);
#8186=ORIENTED_EDGE('',*,*,#5778,.F.);
#8187=ORIENTED_EDGE('',*,*,#5775,.F.);
#8188=ORIENTED_EDGE('',*,*,#5769,.F.);
#8189=ORIENTED_EDGE('',*,*,#5791,.F.);
#8190=ORIENTED_EDGE('',*,*,#5792,.T.);
#8191=ORIENTED_EDGE('',*,*,#5793,.T.);
#8192=ORIENTED_EDGE('',*,*,#5779,.F.);
#8193=ORIENTED_EDGE('',*,*,#5794,.T.);
#8194=ORIENTED_EDGE('',*,*,#5795,.T.);
#8195=ORIENTED_EDGE('',*,*,#5791,.T.);
#8196=ORIENTED_EDGE('',*,*,#5790,.F.);
#8197=ORIENTED_EDGE('',*,*,#5788,.F.);
#8198=ORIENTED_EDGE('',*,*,#5785,.F.);
#8199=ORIENTED_EDGE('',*,*,#5796,.T.);
#8200=ORIENTED_EDGE('',*,*,#5797,.F.);
#8201=ORIENTED_EDGE('',*,*,#5794,.F.);
#8202=ORIENTED_EDGE('',*,*,#5798,.T.);
#8203=ORIENTED_EDGE('',*,*,#5799,.T.);
#8204=ORIENTED_EDGE('',*,*,#5800,.T.);
#8205=ORIENTED_EDGE('',*,*,#5801,.T.);
#8206=ORIENTED_EDGE('',*,*,#5802,.T.);
#8207=ORIENTED_EDGE('',*,*,#5803,.T.);
#8208=ORIENTED_EDGE('',*,*,#5799,.F.);
#8209=ORIENTED_EDGE('',*,*,#5804,.T.);
#8210=ORIENTED_EDGE('',*,*,#5805,.T.);
#8211=ORIENTED_EDGE('',*,*,#5801,.F.);
#8212=ORIENTED_EDGE('',*,*,#5806,.T.);
#8213=ORIENTED_EDGE('',*,*,#5807,.T.);
#8214=ORIENTED_EDGE('',*,*,#5808,.T.);
#8215=ORIENTED_EDGE('',*,*,#5809,.T.);
#8216=ORIENTED_EDGE('',*,*,#5810,.T.);
#8217=ORIENTED_EDGE('',*,*,#5807,.F.);
#8218=ORIENTED_EDGE('',*,*,#5811,.T.);
#8219=ORIENTED_EDGE('',*,*,#5812,.T.);
#8220=ORIENTED_EDGE('',*,*,#5809,.F.);
#8221=ORIENTED_EDGE('',*,*,#5813,.T.);
#8222=ORIENTED_EDGE('',*,*,#5814,.T.);
#8223=ORIENTED_EDGE('',*,*,#5815,.T.);
#8224=ORIENTED_EDGE('',*,*,#5816,.T.);
#8225=ORIENTED_EDGE('',*,*,#5802,.F.);
#8226=ORIENTED_EDGE('',*,*,#5817,.T.);
#8227=ORIENTED_EDGE('',*,*,#5818,.T.);
#8228=ORIENTED_EDGE('',*,*,#5815,.F.);
#8229=ORIENTED_EDGE('',*,*,#5819,.T.);
#8230=ORIENTED_EDGE('',*,*,#5811,.F.);
#8231=ORIENTED_EDGE('',*,*,#5820,.T.);
#8232=ORIENTED_EDGE('',*,*,#5821,.T.);
#8233=ORIENTED_EDGE('',*,*,#5822,.T.);
#8234=ORIENTED_EDGE('',*,*,#5821,.F.);
#8235=ORIENTED_EDGE('',*,*,#5823,.T.);
#8236=ORIENTED_EDGE('',*,*,#5803,.F.);
#8237=ORIENTED_EDGE('',*,*,#5816,.F.);
#8238=ORIENTED_EDGE('',*,*,#5824,.T.);
#8239=ORIENTED_EDGE('',*,*,#5825,.F.);
#8240=ORIENTED_EDGE('',*,*,#5826,.F.);
#8241=ORIENTED_EDGE('',*,*,#5827,.T.);
#8242=ORIENTED_EDGE('',*,*,#5818,.F.);
#8243=ORIENTED_EDGE('',*,*,#5828,.F.);
#8244=ORIENTED_EDGE('',*,*,#5823,.F.);
#8245=ORIENTED_EDGE('',*,*,#5829,.F.);
#8246=ORIENTED_EDGE('',*,*,#5830,.F.);
#8247=ORIENTED_EDGE('',*,*,#5831,.F.);
#8248=ORIENTED_EDGE('',*,*,#5832,.F.);
#8249=ORIENTED_EDGE('',*,*,#5833,.F.);
#8250=ORIENTED_EDGE('',*,*,#5834,.F.);
#8251=ORIENTED_EDGE('',*,*,#5835,.F.);
#8252=ORIENTED_EDGE('',*,*,#5836,.F.);
#8253=ORIENTED_EDGE('',*,*,#5837,.F.);
#8254=ORIENTED_EDGE('',*,*,#5838,.F.);
#8255=ORIENTED_EDGE('',*,*,#5824,.F.);
#8256=ORIENTED_EDGE('',*,*,#5839,.F.);
#8257=ORIENTED_EDGE('',*,*,#5792,.F.);
#8258=ORIENTED_EDGE('',*,*,#5840,.T.);
#8259=ORIENTED_EDGE('',*,*,#5804,.F.);
#8260=ORIENTED_EDGE('',*,*,#5798,.F.);
#8261=ORIENTED_EDGE('',*,*,#5805,.F.);
#8262=ORIENTED_EDGE('',*,*,#5841,.T.);
#8263=ORIENTED_EDGE('',*,*,#5842,.T.);
#8264=ORIENTED_EDGE('',*,*,#5839,.T.);
#8265=ORIENTED_EDGE('',*,*,#5843,.T.);
#8266=ORIENTED_EDGE('',*,*,#5844,.T.);
#8267=ORIENTED_EDGE('',*,*,#5845,.T.);
#8268=ORIENTED_EDGE('',*,*,#5846,.T.);
#8269=ORIENTED_EDGE('',*,*,#5847,.T.);
#8270=ORIENTED_EDGE('',*,*,#5848,.T.);
#8271=ORIENTED_EDGE('',*,*,#5844,.F.);
#8272=ORIENTED_EDGE('',*,*,#5849,.T.);
#8273=ORIENTED_EDGE('',*,*,#5850,.T.);
#8274=ORIENTED_EDGE('',*,*,#5846,.F.);
#8275=ORIENTED_EDGE('',*,*,#5851,.T.);
#8276=ORIENTED_EDGE('',*,*,#5852,.T.);
#8277=ORIENTED_EDGE('',*,*,#5853,.T.);
#8278=ORIENTED_EDGE('',*,*,#5854,.T.);
#8279=ORIENTED_EDGE('',*,*,#5855,.T.);
#8280=ORIENTED_EDGE('',*,*,#5852,.F.);
#8281=ORIENTED_EDGE('',*,*,#5856,.T.);
#8282=ORIENTED_EDGE('',*,*,#5857,.T.);
#8283=ORIENTED_EDGE('',*,*,#5854,.F.);
#8284=ORIENTED_EDGE('',*,*,#5826,.T.);
#8285=ORIENTED_EDGE('',*,*,#5858,.T.);
#8286=ORIENTED_EDGE('',*,*,#5859,.T.);
#8287=ORIENTED_EDGE('',*,*,#5860,.T.);
#8288=ORIENTED_EDGE('',*,*,#5847,.F.);
#8289=ORIENTED_EDGE('',*,*,#5861,.T.);
#8290=ORIENTED_EDGE('',*,*,#5836,.T.);
#8291=ORIENTED_EDGE('',*,*,#5859,.F.);
#8292=ORIENTED_EDGE('',*,*,#5862,.T.);
#8293=ORIENTED_EDGE('',*,*,#5856,.F.);
#8294=ORIENTED_EDGE('',*,*,#5825,.T.);
#8295=ORIENTED_EDGE('',*,*,#5863,.T.);
#8296=ORIENTED_EDGE('',*,*,#5864,.T.);
#8297=ORIENTED_EDGE('',*,*,#5863,.F.);
#8298=ORIENTED_EDGE('',*,*,#5838,.T.);
#8299=ORIENTED_EDGE('',*,*,#5848,.F.);
#8300=ORIENTED_EDGE('',*,*,#5860,.F.);
#8301=ORIENTED_EDGE('',*,*,#5835,.T.);
#8302=ORIENTED_EDGE('',*,*,#5865,.T.);
#8303=ORIENTED_EDGE('',*,*,#5866,.T.);
#8304=ORIENTED_EDGE('',*,*,#5867,.F.);
#8305=ORIENTED_EDGE('',*,*,#5763,.F.);
#8306=ORIENTED_EDGE('',*,*,#5868,.T.);
#8307=ORIENTED_EDGE('',*,*,#5849,.F.);
#8308=ORIENTED_EDGE('',*,*,#5843,.F.);
#8309=ORIENTED_EDGE('',*,*,#5850,.F.);
#8310=ORIENTED_EDGE('',*,*,#5869,.T.);
#8311=ORIENTED_EDGE('',*,*,#5870,.T.);
#8312=ORIENTED_EDGE('',*,*,#5867,.T.);
#8313=ORIENTED_EDGE('',*,*,#5871,.F.);
#8314=ORIENTED_EDGE('',*,*,#5872,.F.);
#8315=ORIENTED_EDGE('',*,*,#5873,.F.);
#8316=ORIENTED_EDGE('',*,*,#5874,.T.);
#8317=ORIENTED_EDGE('',*,*,#5709,.F.);
#8318=ORIENTED_EDGE('',*,*,#5708,.F.);
#8319=ORIENTED_EDGE('',*,*,#5875,.F.);
#8320=ORIENTED_EDGE('',*,*,#5876,.F.);
#8321=ORIENTED_EDGE('',*,*,#5877,.F.);
#8322=ORIENTED_EDGE('',*,*,#5710,.F.);
#8323=ORIENTED_EDGE('',*,*,#5878,.F.);
#8324=ORIENTED_EDGE('',*,*,#5879,.F.);
#8325=ORIENTED_EDGE('',*,*,#5880,.F.);
#8326=ORIENTED_EDGE('',*,*,#5881,.T.);
#8327=ORIENTED_EDGE('',*,*,#5833,.T.);
#8328=ORIENTED_EDGE('',*,*,#5879,.T.);
#8329=ORIENTED_EDGE('',*,*,#5882,.T.);
#8330=ORIENTED_EDGE('',*,*,#5876,.T.);
#8331=ORIENTED_EDGE('',*,*,#5883,.T.);
#8332=ORIENTED_EDGE('',*,*,#5884,.T.);
#8333=ORIENTED_EDGE('',*,*,#5885,.T.);
#8334=ORIENTED_EDGE('',*,*,#5705,.F.);
#8335=ORIENTED_EDGE('',*,*,#5704,.F.);
#8336=ORIENTED_EDGE('',*,*,#5886,.F.);
#8337=ORIENTED_EDGE('',*,*,#5887,.F.);
#8338=ORIENTED_EDGE('',*,*,#5888,.F.);
#8339=ORIENTED_EDGE('',*,*,#5706,.F.);
#8340=ORIENTED_EDGE('',*,*,#5875,.T.);
#8341=ORIENTED_EDGE('',*,*,#5707,.F.);
#8342=ORIENTED_EDGE('',*,*,#5888,.T.);
#8343=ORIENTED_EDGE('',*,*,#5889,.T.);
#8344=ORIENTED_EDGE('',*,*,#5890,.F.);
#8345=ORIENTED_EDGE('',*,*,#5891,.T.);
#8346=ORIENTED_EDGE('',*,*,#5892,.T.);
#8347=ORIENTED_EDGE('',*,*,#5893,.T.);
#8348=ORIENTED_EDGE('',*,*,#5423,.F.);
#8349=ORIENTED_EDGE('',*,*,#5886,.T.);
#8350=ORIENTED_EDGE('',*,*,#5703,.F.);
#8351=ORIENTED_EDGE('',*,*,#5892,.F.);
#8352=ORIENTED_EDGE('',*,*,#5894,.T.);
#8353=ORIENTED_EDGE('',*,*,#5895,.F.);
#8354=ORIENTED_EDGE('',*,*,#5896,.F.);
#8355=ORIENTED_EDGE('',*,*,#5897,.F.);
#8356=ORIENTED_EDGE('',*,*,#5898,.T.);
#8357=ORIENTED_EDGE('',*,*,#5899,.F.);
#8358=ORIENTED_EDGE('',*,*,#5900,.F.);
#8359=ORIENTED_EDGE('',*,*,#5901,.F.);
#8360=ORIENTED_EDGE('',*,*,#5902,.T.);
#8361=ORIENTED_EDGE('',*,*,#5903,.T.);
#8362=ORIENTED_EDGE('',*,*,#5887,.T.);
#8363=ORIENTED_EDGE('',*,*,#5904,.T.);
#8364=ORIENTED_EDGE('',*,*,#5900,.T.);
#8365=ORIENTED_EDGE('',*,*,#5831,.T.);
#8366=ORIENTED_EDGE('',*,*,#5905,.T.);
#8367=ORIENTED_EDGE('',*,*,#5906,.T.);
#8368=ORIENTED_EDGE('',*,*,#5896,.T.);
#8369=ORIENTED_EDGE('',*,*,#5907,.T.);
#8370=ORIENTED_EDGE('',*,*,#5901,.T.);
#8371=ORIENTED_EDGE('',*,*,#5908,.T.);
#8372=ORIENTED_EDGE('',*,*,#5899,.T.);
#8373=ORIENTED_EDGE('',*,*,#5909,.T.);
#8374=ORIENTED_EDGE('',*,*,#5880,.T.);
#8375=ORIENTED_EDGE('',*,*,#5832,.T.);
#8376=ORIENTED_EDGE('',*,*,#5910,.T.);
#8377=ORIENTED_EDGE('',*,*,#5911,.T.);
#8378=ORIENTED_EDGE('',*,*,#5897,.T.);
#8379=ORIENTED_EDGE('',*,*,#5912,.T.);
#8380=ORIENTED_EDGE('',*,*,#5730,.F.);
#8381=ORIENTED_EDGE('',*,*,#5913,.T.);
#8382=ORIENTED_EDGE('',*,*,#5910,.F.);
#8383=ORIENTED_EDGE('',*,*,#5914,.T.);
#8384=ORIENTED_EDGE('',*,*,#5787,.F.);
#8385=ORIENTED_EDGE('',*,*,#5915,.T.);
#8386=ORIENTED_EDGE('',*,*,#5895,.T.);
#8387=ORIENTED_EDGE('',*,*,#5916,.T.);
#8388=ORIENTED_EDGE('',*,*,#5872,.T.);
#8389=ORIENTED_EDGE('',*,*,#5917,.T.);
#8390=ORIENTED_EDGE('',*,*,#5878,.T.);
#8391=ORIENTED_EDGE('',*,*,#5918,.T.);
#8392=ORIENTED_EDGE('',*,*,#5919,.T.);
#8393=ORIENTED_EDGE('',*,*,#5711,.F.);
#8394=ORIENTED_EDGE('',*,*,#5877,.T.);
#8395=ORIENTED_EDGE('',*,*,#5920,.T.);
#8396=ORIENTED_EDGE('',*,*,#5718,.F.);
#8397=ORIENTED_EDGE('',*,*,#5716,.T.);
#8398=ORIENTED_EDGE('',*,*,#5919,.F.);
#8399=ORIENTED_EDGE('',*,*,#5921,.T.);
#8400=ORIENTED_EDGE('',*,*,#5922,.F.);
#8401=ORIENTED_EDGE('',*,*,#5757,.F.);
#8402=ORIENTED_EDGE('',*,*,#5923,.T.);
#8403=ORIENTED_EDGE('',*,*,#5873,.T.);
#8404=ORIENTED_EDGE('',*,*,#5924,.T.);
#8405=ORIENTED_EDGE('',*,*,#5925,.T.);
#8406=ORIENTED_EDGE('',*,*,#5926,.T.);
#8407=ORIENTED_EDGE('',*,*,#5871,.T.);
#8408=ORIENTED_EDGE('',*,*,#5927,.T.);
#8409=ORIENTED_EDGE('',*,*,#5737,.F.);
#8410=ORIENTED_EDGE('',*,*,#5928,.T.);
#8411=ORIENTED_EDGE('',*,*,#5925,.F.);
#8412=ORIENTED_EDGE('',*,*,#5929,.T.);
#8413=ORIENTED_EDGE('',*,*,#5902,.F.);
#8414=ORIENTED_EDGE('',*,*,#5930,.F.);
#8415=ORIENTED_EDGE('',*,*,#4792,.F.);
#8416=ORIENTED_EDGE('',*,*,#5931,.F.);
#8417=ORIENTED_EDGE('',*,*,#5932,.T.);
#8418=ORIENTED_EDGE('',*,*,#5906,.F.);
#8419=ORIENTED_EDGE('',*,*,#5933,.T.);
#8420=ORIENTED_EDGE('',*,*,#5738,.T.);
#8421=ORIENTED_EDGE('',*,*,#5930,.T.);
#8422=ORIENTED_EDGE('',*,*,#5883,.F.);
#8423=ORIENTED_EDGE('',*,*,#5889,.F.);
#8424=ORIENTED_EDGE('',*,*,#5903,.F.);
#8425=ORIENTED_EDGE('',*,*,#5932,.F.);
#8426=ORIENTED_EDGE('',*,*,#5934,.F.);
#8427=ORIENTED_EDGE('',*,*,#5935,.F.);
#8428=ORIENTED_EDGE('',*,*,#5905,.F.);
#8429=ORIENTED_EDGE('',*,*,#5830,.T.);
#8430=ORIENTED_EDGE('',*,*,#5936,.F.);
#8431=ORIENTED_EDGE('',*,*,#5937,.F.);
#8432=ORIENTED_EDGE('',*,*,#5933,.F.);
#8433=ORIENTED_EDGE('',*,*,#5890,.T.);
#8434=ORIENTED_EDGE('',*,*,#5422,.T.);
#8435=ORIENTED_EDGE('',*,*,#5938,.T.);
#8436=ORIENTED_EDGE('',*,*,#5939,.T.);
#8437=ORIENTED_EDGE('',*,*,#5922,.T.);
#8438=ORIENTED_EDGE('',*,*,#5940,.T.);
#8439=ORIENTED_EDGE('',*,*,#5941,.F.);
#8440=ORIENTED_EDGE('',*,*,#5719,.T.);
#8441=ORIENTED_EDGE('',*,*,#5921,.F.);
#8442=ORIENTED_EDGE('',*,*,#5920,.F.);
#8443=ORIENTED_EDGE('',*,*,#5882,.F.);
#8444=ORIENTED_EDGE('',*,*,#5917,.F.);
#8445=ORIENTED_EDGE('',*,*,#5926,.F.);
#8446=ORIENTED_EDGE('',*,*,#5942,.F.);
#8447=ORIENTED_EDGE('',*,*,#5943,.F.);
#8448=ORIENTED_EDGE('',*,*,#5944,.F.);
#8449=ORIENTED_EDGE('',*,*,#5940,.F.);
#8450=ORIENTED_EDGE('',*,*,#5928,.F.);
#8451=ORIENTED_EDGE('',*,*,#5736,.F.);
#8452=ORIENTED_EDGE('',*,*,#5945,.T.);
#8453=ORIENTED_EDGE('',*,*,#5942,.T.);
#8454=ORIENTED_EDGE('',*,*,#5752,.F.);
#8455=ORIENTED_EDGE('',*,*,#5946,.T.);
#8456=ORIENTED_EDGE('',*,*,#5774,.F.);
#8457=ORIENTED_EDGE('',*,*,#5947,.T.);
#8458=ORIENTED_EDGE('',*,*,#5742,.F.);
#8459=ORIENTED_EDGE('',*,*,#5924,.F.);
#8460=ORIENTED_EDGE('',*,*,#5918,.F.);
#8461=ORIENTED_EDGE('',*,*,#5909,.F.);
#8462=ORIENTED_EDGE('',*,*,#5907,.F.);
#8463=ORIENTED_EDGE('',*,*,#5915,.F.);
#8464=ORIENTED_EDGE('',*,*,#5789,.F.);
#8465=ORIENTED_EDGE('',*,*,#5780,.F.);
#8466=ORIENTED_EDGE('',*,*,#5771,.F.);
#8467=ORIENTED_EDGE('',*,*,#5946,.F.);
#8468=ORIENTED_EDGE('',*,*,#5754,.F.);
#8469=ORIENTED_EDGE('',*,*,#5744,.F.);
#8470=ORIENTED_EDGE('',*,*,#5855,.F.);
#8471=ORIENTED_EDGE('',*,*,#5857,.F.);
#8472=ORIENTED_EDGE('',*,*,#5948,.T.);
#8473=ORIENTED_EDGE('',*,*,#5768,.T.);
#8474=ORIENTED_EDGE('',*,*,#5869,.F.);
#8475=ORIENTED_EDGE('',*,*,#5949,.T.);
#8476=ORIENTED_EDGE('',*,*,#5943,.T.);
#8477=ORIENTED_EDGE('',*,*,#5945,.F.);
#8478=ORIENTED_EDGE('',*,*,#5726,.T.);
#8479=ORIENTED_EDGE('',*,*,#5941,.T.);
#8480=ORIENTED_EDGE('',*,*,#5944,.T.);
#8481=ORIENTED_EDGE('',*,*,#5949,.F.);
#8482=ORIENTED_EDGE('',*,*,#5722,.F.);
#8483=ORIENTED_EDGE('',*,*,#5914,.F.);
#8484=ORIENTED_EDGE('',*,*,#5950,.T.);
#8485=ORIENTED_EDGE('',*,*,#5951,.T.);
#8486=ORIENTED_EDGE('',*,*,#5731,.T.);
#8487=ORIENTED_EDGE('',*,*,#5952,.T.);
#8488=ORIENTED_EDGE('',*,*,#5953,.T.);
#8489=ORIENTED_EDGE('',*,*,#5951,.F.);
#8490=ORIENTED_EDGE('',*,*,#5954,.T.);
#8491=ORIENTED_EDGE('',*,*,#5938,.F.);
#8492=ORIENTED_EDGE('',*,*,#5955,.F.);
#8493=ORIENTED_EDGE('',*,*,#5952,.F.);
#8494=ORIENTED_EDGE('',*,*,#5956,.T.);
#8495=ORIENTED_EDGE('',*,*,#5891,.F.);
#8496=ORIENTED_EDGE('',*,*,#5939,.F.);
#8497=ORIENTED_EDGE('',*,*,#5956,.F.);
#8498=ORIENTED_EDGE('',*,*,#5954,.F.);
#8499=ORIENTED_EDGE('',*,*,#5950,.F.);
#8500=ORIENTED_EDGE('',*,*,#5912,.F.);
#8501=ORIENTED_EDGE('',*,*,#5908,.F.);
#8502=ORIENTED_EDGE('',*,*,#5904,.F.);
#8503=ORIENTED_EDGE('',*,*,#5894,.F.);
#8504=ORIENTED_EDGE('',*,*,#5881,.F.);
#8505=ORIENTED_EDGE('',*,*,#5957,.F.);
#8506=ORIENTED_EDGE('',*,*,#5958,.F.);
#8507=ORIENTED_EDGE('',*,*,#5865,.F.);
#8508=ORIENTED_EDGE('',*,*,#5834,.T.);
#8509=ORIENTED_EDGE('',*,*,#5959,.F.);
#8510=ORIENTED_EDGE('',*,*,#5960,.F.);
#8511=ORIENTED_EDGE('',*,*,#5961,.T.);
#8512=ORIENTED_EDGE('',*,*,#5962,.F.);
#8513=ORIENTED_EDGE('',*,*,#5884,.F.);
#8514=ORIENTED_EDGE('',*,*,#5935,.T.);
#8515=ORIENTED_EDGE('',*,*,#5963,.F.);
#8516=ORIENTED_EDGE('',*,*,#4797,.F.);
#8517=ORIENTED_EDGE('',*,*,#5964,.F.);
#8518=ORIENTED_EDGE('',*,*,#5965,.T.);
#8519=ORIENTED_EDGE('',*,*,#4789,.F.);
#8520=ORIENTED_EDGE('',*,*,#5966,.F.);
#8521=ORIENTED_EDGE('',*,*,#5967,.F.);
#8522=ORIENTED_EDGE('',*,*,#5963,.T.);
#8523=ORIENTED_EDGE('',*,*,#5934,.T.);
#8524=ORIENTED_EDGE('',*,*,#5931,.T.);
#8525=ORIENTED_EDGE('',*,*,#4795,.T.);
#8526=ORIENTED_EDGE('',*,*,#5937,.T.);
#8527=ORIENTED_EDGE('',*,*,#5968,.T.);
#8528=ORIENTED_EDGE('',*,*,#5966,.T.);
#8529=ORIENTED_EDGE('',*,*,#5739,.T.);
#8530=ORIENTED_EDGE('',*,*,#5967,.T.);
#8531=ORIENTED_EDGE('',*,*,#5969,.T.);
#8532=ORIENTED_EDGE('',*,*,#5962,.T.);
#8533=ORIENTED_EDGE('',*,*,#5970,.T.);
#8534=ORIENTED_EDGE('',*,*,#4778,.F.);
#8535=ORIENTED_EDGE('',*,*,#5971,.T.);
#8536=ORIENTED_EDGE('',*,*,#5960,.T.);
#8537=ORIENTED_EDGE('',*,*,#5972,.T.);
#8538=ORIENTED_EDGE('',*,*,#5885,.F.);
#8539=ORIENTED_EDGE('',*,*,#5964,.T.);
#8540=ORIENTED_EDGE('',*,*,#5973,.T.);
#8541=ORIENTED_EDGE('',*,*,#5957,.T.);
#8542=ORIENTED_EDGE('',*,*,#5813,.F.);
#8543=ORIENTED_EDGE('',*,*,#5974,.T.);
#8544=ORIENTED_EDGE('',*,*,#5936,.T.);
#8545=ORIENTED_EDGE('',*,*,#5829,.T.);
#8546=ORIENTED_EDGE('',*,*,#5820,.F.);
#8547=ORIENTED_EDGE('',*,*,#5958,.T.);
#8548=ORIENTED_EDGE('',*,*,#5975,.T.);
#8549=ORIENTED_EDGE('',*,*,#5959,.T.);
#8550=ORIENTED_EDGE('',*,*,#5976,.T.);
#8551=ORIENTED_EDGE('',*,*,#4786,.F.);
#8552=ORIENTED_EDGE('',*,*,#4790,.F.);
#8553=ORIENTED_EDGE('',*,*,#5965,.F.);
#8554=ORIENTED_EDGE('',*,*,#5970,.F.);
#8555=ORIENTED_EDGE('',*,*,#5961,.F.);
#8556=ORIENTED_EDGE('',*,*,#5971,.F.);
#8557=ORIENTED_EDGE('',*,*,#4781,.F.);
#8558=ORIENTED_EDGE('',*,*,#4783,.F.);
#8559=ORIENTED_EDGE('',*,*,#5972,.F.);
#8560=ORIENTED_EDGE('',*,*,#5975,.F.);
#8561=ORIENTED_EDGE('',*,*,#5973,.F.);
#8562=ORIENTED_EDGE('',*,*,#4796,.F.);
#8563=ORIENTED_EDGE('',*,*,#5837,.T.);
#8564=ORIENTED_EDGE('',*,*,#5861,.F.);
#8565=ORIENTED_EDGE('',*,*,#5858,.F.);
#8566=ORIENTED_EDGE('',*,*,#5868,.F.);
#8567=ORIENTED_EDGE('',*,*,#5766,.F.);
#8568=ORIENTED_EDGE('',*,*,#5948,.F.);
#8569=ORIENTED_EDGE('',*,*,#5862,.F.);
#8570=ORIENTED_EDGE('',*,*,#5864,.F.);
#8571=ORIENTED_EDGE('',*,*,#5810,.F.);
#8572=ORIENTED_EDGE('',*,*,#5812,.F.);
#8573=ORIENTED_EDGE('',*,*,#5977,.T.);
#8574=ORIENTED_EDGE('',*,*,#5797,.T.);
#8575=ORIENTED_EDGE('',*,*,#5841,.F.);
#8576=ORIENTED_EDGE('',*,*,#5828,.T.);
#8577=ORIENTED_EDGE('',*,*,#5817,.F.);
#8578=ORIENTED_EDGE('',*,*,#5814,.F.);
#8579=ORIENTED_EDGE('',*,*,#5840,.F.);
#8580=ORIENTED_EDGE('',*,*,#5795,.F.);
#8581=ORIENTED_EDGE('',*,*,#5977,.F.);
#8582=ORIENTED_EDGE('',*,*,#5819,.F.);
#8583=ORIENTED_EDGE('',*,*,#5822,.F.);
#8584=ORIENTED_EDGE('',*,*,#5800,.F.);
#8585=ORIENTED_EDGE('',*,*,#5827,.F.);
#8586=ORIENTED_EDGE('',*,*,#5853,.F.);
#8587=ORIENTED_EDGE('',*,*,#5851,.F.);
#8588=ORIENTED_EDGE('',*,*,#5845,.F.);
#8589=ORIENTED_EDGE('',*,*,#5866,.F.);
#8590=ORIENTED_EDGE('',*,*,#5976,.F.);
#8591=ORIENTED_EDGE('',*,*,#5969,.F.);
#8592=ORIENTED_EDGE('',*,*,#5968,.F.);
#8593=ORIENTED_EDGE('',*,*,#5974,.F.);
#8594=ORIENTED_EDGE('',*,*,#5808,.F.);
#8595=ORIENTED_EDGE('',*,*,#5806,.F.);
#8596=ORIENTED_EDGE('',*,*,#5978,.F.);
#8597=ORIENTED_EDGE('',*,*,#5776,.F.);
#8598=ORIENTED_EDGE('',*,*,#5793,.F.);
#8599=ORIENTED_EDGE('',*,*,#5842,.F.);
#8600=ORIENTED_EDGE('',*,*,#5796,.F.);
#8601=ORIENTED_EDGE('',*,*,#5784,.F.);
#8602=ORIENTED_EDGE('',*,*,#5979,.F.);
#8603=ORIENTED_EDGE('',*,*,#5759,.F.);
#8604=ORIENTED_EDGE('',*,*,#5764,.F.);
#8605=ORIENTED_EDGE('',*,*,#5870,.F.);
#8606=ORIENTED_EDGE('',*,*,#5767,.F.);
#8607=ORIENTED_EDGE('',*,*,#5749,.F.);
#8608=ORIENTED_EDGE('',*,*,#5979,.T.);
#8609=ORIENTED_EDGE('',*,*,#5748,.F.);
#8610=ORIENTED_EDGE('',*,*,#5947,.F.);
#8611=ORIENTED_EDGE('',*,*,#5777,.F.);
#8612=ORIENTED_EDGE('',*,*,#5978,.T.);
#8613=ORIENTED_EDGE('',*,*,#5783,.F.);
#8614=ORIENTED_EDGE('',*,*,#5916,.F.);
#8615=ORIENTED_EDGE('',*,*,#5898,.F.);
#8616=ORIENTED_EDGE('',*,*,#5911,.F.);
#8617=ORIENTED_EDGE('',*,*,#5913,.F.);
#8618=ORIENTED_EDGE('',*,*,#5980,.F.);
#8619=ORIENTED_EDGE('',*,*,#5929,.F.);
#8620=ORIENTED_EDGE('',*,*,#5927,.F.);
#8621=ORIENTED_EDGE('',*,*,#5874,.F.);
#8622=ORIENTED_EDGE('',*,*,#5923,.F.);
#8623=ORIENTED_EDGE('',*,*,#5760,.F.);
#8624=ORIENTED_EDGE('',*,*,#5702,.T.);
#8625=ORIENTED_EDGE('',*,*,#5981,.F.);
#8626=ORIENTED_EDGE('',*,*,#5424,.T.);
#8627=ORIENTED_EDGE('',*,*,#5893,.F.);
#8628=ORIENTED_EDGE('',*,*,#5421,.T.);
#8629=ORIENTED_EDGE('',*,*,#5420,.T.);
#8630=ORIENTED_EDGE('',*,*,#5982,.T.);
#8631=ORIENTED_EDGE('',*,*,#5955,.T.);
#8632=ORIENTED_EDGE('',*,*,#5982,.F.);
#8633=ORIENTED_EDGE('',*,*,#5983,.T.);
#8634=ORIENTED_EDGE('',*,*,#5732,.T.);
#8635=ORIENTED_EDGE('',*,*,#5953,.F.);
#8636=ORIENTED_EDGE('',*,*,#5984,.F.);
#8637=ORIENTED_EDGE('',*,*,#5985,.T.);
#8638=ORIENTED_EDGE('',*,*,#5986,.T.);
#8639=ORIENTED_EDGE('',*,*,#5987,.F.);
#8640=ORIENTED_EDGE('',*,*,#5988,.F.);
#8641=ORIENTED_EDGE('',*,*,#5989,.T.);
#8642=ORIENTED_EDGE('',*,*,#5984,.T.);
#8643=ORIENTED_EDGE('',*,*,#5990,.F.);
#8644=ORIENTED_EDGE('',*,*,#5991,.F.);
#8645=ORIENTED_EDGE('',*,*,#5992,.T.);
#8646=ORIENTED_EDGE('',*,*,#5988,.T.);
#8647=ORIENTED_EDGE('',*,*,#5993,.F.);
#8648=ORIENTED_EDGE('',*,*,#5994,.F.);
#8649=ORIENTED_EDGE('',*,*,#5995,.T.);
#8650=ORIENTED_EDGE('',*,*,#5996,.F.);
#8651=ORIENTED_EDGE('',*,*,#5997,.F.);
#8652=ORIENTED_EDGE('',*,*,#5995,.F.);
#8653=ORIENTED_EDGE('',*,*,#5998,.T.);
#8654=ORIENTED_EDGE('',*,*,#5999,.T.);
#8655=ORIENTED_EDGE('',*,*,#6000,.T.);
#8656=ORIENTED_EDGE('',*,*,#5111,.T.);
#8657=ORIENTED_EDGE('',*,*,#6001,.T.);
#8658=ORIENTED_EDGE('',*,*,#6002,.T.);
#8659=ORIENTED_EDGE('',*,*,#6003,.F.);
#8660=ORIENTED_EDGE('',*,*,#5999,.F.);
#8661=ORIENTED_EDGE('',*,*,#6004,.T.);
#8662=ORIENTED_EDGE('',*,*,#6005,.T.);
#8663=ORIENTED_EDGE('',*,*,#6006,.T.);
#8664=ORIENTED_EDGE('',*,*,#6004,.F.);
#8665=ORIENTED_EDGE('',*,*,#5998,.F.);
#8666=ORIENTED_EDGE('',*,*,#6007,.F.);
#8667=ORIENTED_EDGE('',*,*,#6002,.F.);
#8668=ORIENTED_EDGE('',*,*,#6008,.T.);
#8669=ORIENTED_EDGE('',*,*,#6009,.T.);
#8670=ORIENTED_EDGE('',*,*,#6010,.T.);
#8671=ORIENTED_EDGE('',*,*,#6011,.T.);
#8672=ORIENTED_EDGE('',*,*,#6012,.T.);
#8673=ORIENTED_EDGE('',*,*,#6013,.F.);
#8674=ORIENTED_EDGE('',*,*,#6014,.T.);
#8675=ORIENTED_EDGE('',*,*,#6015,.F.);
#8676=ORIENTED_EDGE('',*,*,#5412,.T.);
#8677=ORIENTED_EDGE('',*,*,#5427,.T.);
#8678=ORIENTED_EDGE('',*,*,#6016,.T.);
#8679=ORIENTED_EDGE('',*,*,#6017,.F.);
#8680=ORIENTED_EDGE('',*,*,#6018,.T.);
#8681=ORIENTED_EDGE('',*,*,#6019,.F.);
#8682=ORIENTED_EDGE('',*,*,#6020,.F.);
#8683=ORIENTED_EDGE('',*,*,#6016,.F.);
#8684=ORIENTED_EDGE('',*,*,#6021,.F.);
#8685=ORIENTED_EDGE('',*,*,#6022,.F.);
#8686=ORIENTED_EDGE('',*,*,#6023,.T.);
#8687=ORIENTED_EDGE('',*,*,#6024,.T.);
#8688=ORIENTED_EDGE('',*,*,#6025,.T.);
#8689=ORIENTED_EDGE('',*,*,#6026,.T.);
#8690=ORIENTED_EDGE('',*,*,#6027,.F.);
#8691=ORIENTED_EDGE('',*,*,#6028,.F.);
#8692=ORIENTED_EDGE('',*,*,#6029,.F.);
#8693=ORIENTED_EDGE('',*,*,#6030,.T.);
#8694=ORIENTED_EDGE('',*,*,#6031,.T.);
#8695=ORIENTED_EDGE('',*,*,#6032,.F.);
#8696=ORIENTED_EDGE('',*,*,#6033,.F.);
#8697=ORIENTED_EDGE('',*,*,#6034,.T.);
#8698=ORIENTED_EDGE('',*,*,#6029,.T.);
#8699=ORIENTED_EDGE('',*,*,#6035,.F.);
#8700=ORIENTED_EDGE('',*,*,#6036,.F.);
#8701=ORIENTED_EDGE('',*,*,#6037,.T.);
#8702=ORIENTED_EDGE('',*,*,#6033,.T.);
#8703=ORIENTED_EDGE('',*,*,#6038,.F.);
#8704=ORIENTED_EDGE('',*,*,#6039,.F.);
#8705=ORIENTED_EDGE('',*,*,#6040,.T.);
#8706=ORIENTED_EDGE('',*,*,#6041,.T.);
#8707=ORIENTED_EDGE('',*,*,#6036,.T.);
#8708=ORIENTED_EDGE('',*,*,#6042,.F.);
#8709=ORIENTED_EDGE('',*,*,#6043,.F.);
#8710=ORIENTED_EDGE('',*,*,#6044,.F.);
#8711=ORIENTED_EDGE('',*,*,#5160,.T.);
#8712=ORIENTED_EDGE('',*,*,#6039,.T.);
#8713=ORIENTED_EDGE('',*,*,#6045,.F.);
#8714=ORIENTED_EDGE('',*,*,#6046,.F.);
#8715=ORIENTED_EDGE('',*,*,#6022,.T.);
#8716=ORIENTED_EDGE('',*,*,#6047,.F.);
#8717=ORIENTED_EDGE('',*,*,#6048,.T.);
#8718=ORIENTED_EDGE('',*,*,#6023,.F.);
#8719=ORIENTED_EDGE('',*,*,#6049,.F.);
#8720=ORIENTED_EDGE('',*,*,#6050,.F.);
#8721=ORIENTED_EDGE('',*,*,#6026,.F.);
#8722=ORIENTED_EDGE('',*,*,#6051,.T.);
#8723=ORIENTED_EDGE('',*,*,#6052,.T.);
#8724=ORIENTED_EDGE('',*,*,#6053,.F.);
#8725=ORIENTED_EDGE('',*,*,#6054,.T.);
#8726=ORIENTED_EDGE('',*,*,#6055,.F.);
#8727=ORIENTED_EDGE('',*,*,#6056,.F.);
#8728=ORIENTED_EDGE('',*,*,#6054,.F.);
#8729=ORIENTED_EDGE('',*,*,#6057,.T.);
#8730=ORIENTED_EDGE('',*,*,#6058,.T.);
#8731=ORIENTED_EDGE('',*,*,#6053,.T.);
#8732=ORIENTED_EDGE('',*,*,#6058,.F.);
#8733=ORIENTED_EDGE('',*,*,#6059,.F.);
#8734=ORIENTED_EDGE('',*,*,#6060,.F.);
#8735=ORIENTED_EDGE('',*,*,#6061,.F.);
#8736=ORIENTED_EDGE('',*,*,#6062,.F.);
#8737=ORIENTED_EDGE('',*,*,#6010,.F.);
#8738=ORIENTED_EDGE('',*,*,#6063,.F.);
#8739=ORIENTED_EDGE('',*,*,#6064,.F.);
#8740=ORIENTED_EDGE('',*,*,#6065,.F.);
#8741=ORIENTED_EDGE('',*,*,#6066,.F.);
#8742=ORIENTED_EDGE('',*,*,#6057,.F.);
#8743=ORIENTED_EDGE('',*,*,#6066,.T.);
#8744=ORIENTED_EDGE('',*,*,#6067,.T.);
#8745=ORIENTED_EDGE('',*,*,#5994,.T.);
#8746=ORIENTED_EDGE('',*,*,#6067,.F.);
#8747=ORIENTED_EDGE('',*,*,#6068,.T.);
#8748=ORIENTED_EDGE('',*,*,#6069,.F.);
#8749=ORIENTED_EDGE('',*,*,#5715,.T.);
#8750=ORIENTED_EDGE('',*,*,#5136,.T.);
#8751=ORIENTED_EDGE('',*,*,#5144,.T.);
#8752=ORIENTED_EDGE('',*,*,#5143,.T.);
#8753=ORIENTED_EDGE('',*,*,#6070,.T.);
#8754=ORIENTED_EDGE('',*,*,#5145,.F.);
#8755=ORIENTED_EDGE('',*,*,#5419,.F.);
#8756=ORIENTED_EDGE('',*,*,#6071,.T.);
#8757=ORIENTED_EDGE('',*,*,#6072,.T.);
#8758=ORIENTED_EDGE('',*,*,#5983,.F.);
#8759=ORIENTED_EDGE('',*,*,#6073,.F.);
#8760=ORIENTED_EDGE('',*,*,#6074,.F.);
#8761=ORIENTED_EDGE('',*,*,#6048,.F.);
#8762=ORIENTED_EDGE('',*,*,#6075,.F.);
#8763=ORIENTED_EDGE('',*,*,#6076,.T.);
#8764=ORIENTED_EDGE('',*,*,#6077,.F.);
#8765=ORIENTED_EDGE('',*,*,#6073,.T.);
#8766=ORIENTED_EDGE('',*,*,#6078,.F.);
#8767=ORIENTED_EDGE('',*,*,#6079,.F.);
#8768=ORIENTED_EDGE('',*,*,#6076,.F.);
#8769=ORIENTED_EDGE('',*,*,#6080,.F.);
#8770=ORIENTED_EDGE('',*,*,#6081,.F.);
#8771=ORIENTED_EDGE('',*,*,#6081,.T.);
#8772=ORIENTED_EDGE('',*,*,#6082,.F.);
#8773=ORIENTED_EDGE('',*,*,#6083,.T.);
#8774=ORIENTED_EDGE('',*,*,#6012,.F.);
#8775=ORIENTED_EDGE('',*,*,#6084,.F.);
#8776=ORIENTED_EDGE('',*,*,#5106,.T.);
#8777=ORIENTED_EDGE('',*,*,#5714,.F.);
#8778=ORIENTED_EDGE('',*,*,#6069,.T.);
#8779=ORIENTED_EDGE('',*,*,#6085,.T.);
#8780=ORIENTED_EDGE('',*,*,#5107,.T.);
#8781=ORIENTED_EDGE('',*,*,#6084,.T.);
#8782=ORIENTED_EDGE('',*,*,#6086,.T.);
#8783=ORIENTED_EDGE('',*,*,#6087,.F.);
#8784=ORIENTED_EDGE('',*,*,#6088,.F.);
#8785=ORIENTED_EDGE('',*,*,#6089,.F.);
#8786=ORIENTED_EDGE('',*,*,#6090,.F.);
#8787=ORIENTED_EDGE('',*,*,#6091,.F.);
#8788=ORIENTED_EDGE('',*,*,#6092,.F.);
#8789=ORIENTED_EDGE('',*,*,#6093,.F.);
#8790=ORIENTED_EDGE('',*,*,#6031,.F.);
#8791=ORIENTED_EDGE('',*,*,#5437,.T.);
#8792=ORIENTED_EDGE('',*,*,#6094,.T.);
#8793=ORIENTED_EDGE('',*,*,#6095,.T.);
#8794=ORIENTED_EDGE('',*,*,#6096,.T.);
#8795=ORIENTED_EDGE('',*,*,#5991,.T.);
#8796=ORIENTED_EDGE('',*,*,#6097,.T.);
#8797=ORIENTED_EDGE('',*,*,#6098,.T.);
#8798=ORIENTED_EDGE('',*,*,#6099,.T.);
[truncated: 1,377,861 more chars]
