# Supplementary material for: De novo Powered Air-Purifying Respirator Design and Fabrication for Pandemic Response
Source: medRxiv preprint, doi:10.1101/2021.03.25.21252076, version 1 (2021-03-29)
Supplement: Supplementary Material 4 [file 252076_file05.zip › Supplementary Material 4/CAD Files/Custom Filter/Custom Filter Housing.step]

ISO-10303-21;
HEADER;
/* Generated by software containing ST-Developer
 * from STEP Tools, Inc. (www.steptools.com) 
 */

FILE_DESCRIPTION(
/* description */ (''),
/* implementation_level */ '2;1');

FILE_NAME(
/* name */ 'C:/Users/Ferrous/Desktop/custom filter housing.step',
/* time_stamp */ '2020-12-19T19:16:02-05:00',
/* author */ (''),
/* organization */ (''),
/* preprocessor_version */ 'ST-DEVELOPER v18.1',
/* originating_system */ 'Autodesk Translation Framework v9.7.1.1290',
/* authorisation */ '');

FILE_SCHEMA (('AUTOMOTIVE_DESIGN { 1 0 10303 214 3 1 1 }'));
ENDSEC;

DATA;
#10=MECHANICAL_DESIGN_GEOMETRIC_PRESENTATION_REPRESENTATION('',(#25),#37105);
#11=ITEM_DEFINED_TRANSFORMATION($,$,#1592,#1755);
#12=ITEM_DEFINED_TRANSFORMATION($,$,#1591,#1756);
#13=ITEM_DEFINED_TRANSFORMATION($,$,#1590,#1757);
#14=(
REPRESENTATION_RELATIONSHIP($,$,#37124,#37123)
REPRESENTATION_RELATIONSHIP_WITH_TRANSFORMATION(#11)
SHAPE_REPRESENTATION_RELATIONSHIP()
);
#15=(
REPRESENTATION_RELATIONSHIP($,$,#37123,#37122)
REPRESENTATION_RELATIONSHIP_WITH_TRANSFORMATION(#12)
SHAPE_REPRESENTATION_RELATIONSHIP()
);
#16=(
REPRESENTATION_RELATIONSHIP($,$,#37122,#37121)
REPRESENTATION_RELATIONSHIP_WITH_TRANSFORMATION(#13)
SHAPE_REPRESENTATION_RELATIONSHIP()
);
#17=CONTEXT_DEPENDENT_SHAPE_REPRESENTATION(#14,#37118);
#18=CONTEXT_DEPENDENT_SHAPE_REPRESENTATION(#15,#37119);
#19=CONTEXT_DEPENDENT_SHAPE_REPRESENTATION(#16,#37120);
#20=NEXT_ASSEMBLY_USAGE_OCCURRENCE('1271-13987 - Rev01:1',
'1271-13987 - Rev01:1','1271-13987 - Rev01:1',#37128,#37129,
'1271-13987 - Rev01:1');
#21=NEXT_ASSEMBLY_USAGE_OCCURRENCE('KFilterPanFabThing v3:1',
'KFilterPanFabThing v3:1','KFilterPanFabThing v3:1',#37127,#37128,
'KFilterPanFabThing v3:1');
#22=NEXT_ASSEMBLY_USAGE_OCCURRENCE('Housing v2:1','Housing v2:1',
'Housing v2:1',#37126,#37127,'Housing v2:1');
#23=SHAPE_REPRESENTATION_RELATIONSHIP('SRR','None',#37124,#24);
#24=ADVANCED_BREP_SHAPE_REPRESENTATION('',(#26),#37104);
#25=STYLED_ITEM('',(#37145),#26);
#26=MANIFOLD_SOLID_BREP('Body1',#1576);
#27=(
BOUNDED_CURVE()
B_SPLINE_CURVE(2,(#35815,#35816,#35817),.UNSPECIFIED.,.F.,.F.)
B_SPLINE_CURVE_WITH_KNOTS((3,3),(-3.11106105723483,-0.218359597482129),
 .UNSPECIFIED.)
CURVE()
GEOMETRIC_REPRESENTATION_ITEM()
RATIONAL_B_SPLINE_CURVE((1.06385224840213,1.16821910472625,1.02329941291568))
REPRESENTATION_ITEM('')
);
#28=(
BOUNDED_CURVE()
B_SPLINE_CURVE(2,(#35819,#35820,#35821),.UNSPECIFIED.,.F.,.F.)
B_SPLINE_CURVE_WITH_KNOTS((3,3),(-3.58163296347622,-0.688931503516999),
 .UNSPECIFIED.)
CURVE()
GEOMETRIC_REPRESENTATION_ITEM()
RATIONAL_B_SPLINE_CURVE((1.02329941252285,1.16821910118128,1.06385224695917))
REPRESENTATION_ITEM('')
);
#29=(
BOUNDED_CURVE()
B_SPLINE_CURVE(2,(#35834,#35835,#35836),.UNSPECIFIED.,.F.,.F.)
B_SPLINE_CURVE_WITH_KNOTS((3,3),(0.218359597316097,3.1110610570434),
 .UNSPECIFIED.)
CURVE()
GEOMETRIC_REPRESENTATION_ITEM()
RATIONAL_B_SPLINE_CURVE((1.02329941298084,1.16821910531322,1.06385224864011))
REPRESENTATION_ITEM('')
);
#30=(
BOUNDED_CURVE()
B_SPLINE_CURVE(2,(#35839,#35840,#35841),.UNSPECIFIED.,.F.,.F.)
B_SPLINE_CURVE_WITH_KNOTS((3,3),(-3.11106105941418,-0.218359599287818),
 .UNSPECIFIED.)
CURVE()
GEOMETRIC_REPRESENTATION_ITEM()
RATIONAL_B_SPLINE_CURVE((1.06385224583216,1.16821909841399,1.02329941221622))
REPRESENTATION_ITEM('')
);
#31=(
BOUNDED_CURVE()
B_SPLINE_CURVE(2,(#35854,#35855,#35856),.UNSPECIFIED.,.F.,.F.)
B_SPLINE_CURVE_WITH_KNOTS((3,3),(0.218359597956227,3.11106105780993),
 .UNSPECIFIED.)
CURVE()
GEOMETRIC_REPRESENTATION_ITEM()
RATIONAL_B_SPLINE_CURVE((1.02329941273227,1.16821910307077,1.0638522477278))
REPRESENTATION_ITEM('')
);
#32=(
BOUNDED_CURVE()
B_SPLINE_CURVE(2,(#35859,#35860,#35861),.UNSPECIFIED.,.F.,.F.)
B_SPLINE_CURVE_WITH_KNOTS((3,3),(-3.11106105788901,-0.218359598028193),
 .UNSPECIFIED.)
CURVE()
GEOMETRIC_REPRESENTATION_ITEM()
RATIONAL_B_SPLINE_CURVE((1.06385224762454,1.16821910281511,1.02329941270388))
REPRESENTATION_ITEM('')
);
#33=(
BOUNDED_CURVE()
B_SPLINE_CURVE(2,(#35874,#35875,#35876),.UNSPECIFIED.,.F.,.F.)
B_SPLINE_CURVE_WITH_KNOTS((3,3),(0.21835959746624,3.11106105723089),
 .UNSPECIFIED.)
CURVE()
GEOMETRIC_REPRESENTATION_ITEM()
RATIONAL_B_SPLINE_CURVE((1.02329941292307,1.16821910479149,1.06385224842703))
REPRESENTATION_ITEM('')
);
#34=(
BOUNDED_CURVE()
B_SPLINE_CURVE(2,(#35879,#35880,#35881),.UNSPECIFIED.,.F.,.F.)
B_SPLINE_CURVE_WITH_KNOTS((3,3),(-3.11106106005376,-0.218359599827914),
 .UNSPECIFIED.)
CURVE()
GEOMETRIC_REPRESENTATION_ITEM()
RATIONAL_B_SPLINE_CURVE((1.06385224506195,1.16821909651899,1.02329941200613))
REPRESENTATION_ITEM('')
);
#35=(
BOUNDED_CURVE()
B_SPLINE_CURVE(2,(#36950,#36951,#36952),.UNSPECIFIED.,.F.,.F.)
B_SPLINE_CURVE_WITH_KNOTS((3,3),(-3.11106105799556,-0.218359598108631),
 .UNSPECIFIED.)
CURVE()
GEOMETRIC_REPRESENTATION_ITEM()
RATIONAL_B_SPLINE_CURVE((1.06385224751145,1.16821910253989,1.02329941267348))
REPRESENTATION_ITEM('')
);
#36=(
BOUNDED_CURVE()
B_SPLINE_CURVE(2,(#36953,#36954,#36955),.UNSPECIFIED.,.F.,.F.)
B_SPLINE_CURVE_WITH_KNOTS((3,3),(-3.5816329647953,-0.688931505095315),
 .UNSPECIFIED.)
CURVE()
GEOMETRIC_REPRESENTATION_ITEM()
RATIONAL_B_SPLINE_CURVE((1.02329941303487,1.16821910580087,1.0638522488385))
REPRESENTATION_ITEM('')
);
#37=(
BOUNDED_CURVE()
B_SPLINE_CURVE(2,(#36957,#36958,#36959),.UNSPECIFIED.,.F.,.F.)
B_SPLINE_CURVE_WITH_KNOTS((3,3),(-3.11106105859755,-0.218359598621799),
 .UNSPECIFIED.)
CURVE()
GEOMETRIC_REPRESENTATION_ITEM()
RATIONAL_B_SPLINE_CURVE((1.06385224677847,1.16821910073493,1.02329941247329))
REPRESENTATION_ITEM('')
);
#38=(
BOUNDED_CURVE()
B_SPLINE_CURVE(2,(#36960,#36961,#36962),.UNSPECIFIED.,.F.,.F.)
B_SPLINE_CURVE_WITH_KNOTS((3,3),(-3.58163296316924,-0.688931503145578),
 .UNSPECIFIED.)
CURVE()
GEOMETRIC_REPRESENTATION_ITEM()
RATIONAL_B_SPLINE_CURVE((1.02329941240395,1.16821910010835,1.06385224652225))
REPRESENTATION_ITEM('')
);
#39=(
BOUNDED_CURVE()
B_SPLINE_CURVE(2,(#36964,#36965,#36966),.UNSPECIFIED.,.F.,.F.)
B_SPLINE_CURVE_WITH_KNOTS((3,3),(-3.1110610588263,-0.218359598802743),
 .UNSPECIFIED.)
CURVE()
GEOMETRIC_REPRESENTATION_ITEM()
RATIONAL_B_SPLINE_CURVE((1.06385224652217,1.16821910010812,1.02329941240392))
REPRESENTATION_ITEM('')
);
#40=(
BOUNDED_CURVE()
B_SPLINE_CURVE(2,(#36967,#36968,#36969),.UNSPECIFIED.,.F.,.F.)
B_SPLINE_CURVE_WITH_KNOTS((3,3),(-3.58163296478612,-0.688931505084634),
 .UNSPECIFIED.)
CURVE()
GEOMETRIC_REPRESENTATION_ITEM()
RATIONAL_B_SPLINE_CURVE((1.0232994130314,1.16821910576939,1.06385224882571))
REPRESENTATION_ITEM('')
);
#41=(
BOUNDED_CURVE()
B_SPLINE_CURVE(2,(#36971,#36972,#36973),.UNSPECIFIED.,.F.,.F.)
B_SPLINE_CURVE_WITH_KNOTS((3,3),(-3.11106105623257,-0.218359596640907),
 .UNSPECIFIED.)
CURVE()
GEOMETRIC_REPRESENTATION_ITEM()
RATIONAL_B_SPLINE_CURVE((1.06385224960137,1.16821910767527,1.0232994132426))
REPRESENTATION_ITEM('')
);
#42=(
BOUNDED_CURVE()
B_SPLINE_CURVE(2,(#36974,#36975,#36976),.UNSPECIFIED.,.F.,.F.)
B_SPLINE_CURVE_WITH_KNOTS((3,3),(-3.58163296291431,-0.688931502843934),
 .UNSPECIFIED.)
CURVE()
GEOMETRIC_REPRESENTATION_ITEM()
RATIONAL_B_SPLINE_CURVE((1.02329941230458,1.16821909921192,1.06385224615797))
REPRESENTATION_ITEM('')
);
#43=CONICAL_SURFACE('',#1627,50.5962340495975,0.0261799387799152);
#44=CONICAL_SURFACE('',#1629,17.5,0.0130899693899575);
#45=CONICAL_SURFACE('',#1662,46.9605204399732,1.31510559137773);
#46=CONICAL_SURFACE('',#1665,52.2477999999999,0.026179938779915);
#47=CONICAL_SURFACE('',#1689,46.9072981708171,1.31510559137773);
#48=CONICAL_SURFACE('',#1697,46.9072981708171,1.31510559137773);
#49=CONICAL_SURFACE('',#1705,46.9072981708172,1.31510559137773);
#50=CONICAL_SURFACE('',#1713,46.9072981708171,1.31510559137773);
#51=CONICAL_SURFACE('',#1743,46.9072981708172,1.31510559137773);
#52=CONICAL_SURFACE('',#1744,46.9072981708172,1.31510559137773);
#53=CONICAL_SURFACE('',#1745,46.9072981708171,1.31510559137773);
#54=CONICAL_SURFACE('',#1746,46.9072981708171,1.31510559137773);
#55=(
BOUNDED_SURFACE()
B_SPLINE_SURFACE(3,2,((#4222,#4223,#4224),(#4225,#4226,#4227),(#4228,#4229,
#4230),(#4231,#4232,#4233),(#4234,#4235,#4236),(#4237,#4238,#4239),(#4240,
#4241,#4242),(#4243,#4244,#4245),(#4246,#4247,#4248),(#4249,#4250,#4251),
(#4252,#4253,#4254),(#4255,#4256,#4257),(#4258,#4259,#4260),(#4261,#4262,
#4263),(#4264,#4265,#4266),(#4267,#4268,#4269),(#4270,#4271,#4272),(#4273,
#4274,#4275)),.UNSPECIFIED.,.F.,.F.,.F.)
B_SPLINE_SURFACE_WITH_KNOTS((4,2,2,2,2,2,2,2,4),(3,3),(4.70278451940636,
4.90033461787801,5.09788471634966,5.29543481482132,5.49298491329297,5.69053501176463,
5.88808511023628,6.08563520870793,6.28781515978109),(0.,1.0046298526015),
 .UNSPECIFIED.)
GEOMETRIC_REPRESENTATION_ITEM()
RATIONAL_B_SPLINE_SURFACE(((1.,0.714973861746017,1.00263925801538),(1.,
0.715074570648745,1.00263832548063),(1.,0.715175346804517,1.00263739232314),
(1.,0.71537313306344,1.00263556088069),(1.,0.715470137010245,1.00263466265274),
(1.,0.71565661045724,1.00263293596359),(1.,0.71574607524549,1.00263210754602),
(1.,0.715914001220181,1.002630552601),(1.,0.715992458218511,1.00262982611233),
(1.,0.716135329629181,1.00262850316518),(1.,0.716199740501749,1.00262790673949),
(1.,0.716312026959497,1.00262686699999),(1.,0.716359899784787,1.00262642371174),
(1.,0.716437258640866,1.00262570739154),(1.,0.71646674275296,1.00262543437736),
(1.,0.716506646263552,1.00262506488261),(1.,0.716516601622775,1.00262497269892),
(1.,0.716516123902597,1.00262497712247)))
REPRESENTATION_ITEM('')
SURFACE()
);
#56=(
BOUNDED_SURFACE()
B_SPLINE_SURFACE(3,2,((#4403,#4404,#4405),(#4406,#4407,#4408),(#4409,#4410,
#4411),(#4412,#4413,#4414),(#4415,#4416,#4417),(#4418,#4419,#4420),(#4421,
#4422,#4423),(#4424,#4425,#4426),(#4427,#4428,#4429),(#4430,#4431,#4432),
(#4433,#4434,#4435),(#4436,#4437,#4438),(#4439,#4440,#4441),(#4442,#4443,
#4444),(#4445,#4446,#4447),(#4448,#4449,#4450),(#4451,#4452,#4453),(#4454,
#4455,#4456)),.UNSPECIFIED.,.F.,.F.,.F.)
B_SPLINE_SURFACE_WITH_KNOTS((4,2,2,2,2,2,2,2,4),(3,3),(4.70278451940636,
4.90033461787801,5.09788471634966,5.29543481482132,5.49298491329297,5.69053501176463,
5.88808511023628,6.08563520870793,6.28781515978109),(0.,1.0046298526015),
 .UNSPECIFIED.)
GEOMETRIC_REPRESENTATION_ITEM()
RATIONAL_B_SPLINE_SURFACE(((1.,0.714973861746018,1.00263925801538),(1.,
0.715074570648746,1.00263832548063),(1.,0.715175346804518,1.00263739232314),
(1.,0.715373133063441,1.00263556088069),(1.,0.715470137010246,1.00263466265274),
(1.,0.715656610457241,1.00263293596359),(1.,0.715746075245491,1.00263210754602),
(1.,0.715914001220182,1.002630552601),(1.,0.715992458218512,1.00262982611233),
(1.,0.716135329629182,1.00262850316518),(1.,0.71619974050175,1.00262790673949),
(1.,0.716312026959498,1.00262686699999),(1.,0.716359899784788,1.00262642371174),
(1.,0.716437258640867,1.00262570739154),(1.,0.716466742752961,1.00262543437735),
(1.,0.716506646263553,1.00262506488261),(1.,0.716516601622776,1.00262497269892),
(1.,0.716516123902598,1.00262497712247)))
REPRESENTATION_ITEM('')
SURFACE()
);
#57=(
BOUNDED_SURFACE()
B_SPLINE_SURFACE(3,2,((#36985,#36986,#36987),(#36988,#36989,#36990),(#36991,
#36992,#36993),(#36994,#36995,#36996),(#36997,#36998,#36999),(#37000,#37001,
#37002),(#37003,#37004,#37005),(#37006,#37007,#37008),(#37009,#37010,#37011),
(#37012,#37013,#37014),(#37015,#37016,#37017),(#37018,#37019,#37020),(#37021,
#37022,#37023),(#37024,#37025,#37026),(#37027,#37028,#37029),(#37030,#37031,
#37032),(#37033,#37034,#37035),(#37036,#37037,#37038)),.UNSPECIFIED.,.F.,
 .F.,.F.)
B_SPLINE_SURFACE_WITH_KNOTS((4,2,2,2,2,2,2,2,4),(3,3),(-0.00462985261013508,
0.197550098471654,0.395100196943307,0.592650295414961,0.790200393886615,
0.987750492358268,1.18530059082992,1.38285068930158,1.58040078777323),(0.,
1.00462985261014),.UNSPECIFIED.)
GEOMETRIC_REPRESENTATION_ITEM()
RATIONAL_B_SPLINE_SURFACE(((1.,0.716516123900144,1.00262497712738),(1.,
0.716516601620842,1.00262497270383),(1.,0.716506646250414,1.00262506488763),
(1.,0.716466742760981,1.00262543438218),(1.,0.716437258633571,1.00262570739651),
(1.,0.716359899787203,1.00262642371662),(1.,0.71631202696154,1.00262686700487),
(1.,0.716199740494825,1.00262790674445),(1.,0.716135329626742,1.00262850317011),
(1.,0.715992458216071,1.00262982611725),(1.,0.715914001218864,1.00263055260592),
(1.,0.715746075241928,1.00263210755096),(1.,0.715656610445084,1.00263293596861),
(1.,0.715470137017513,1.00263466265758),(1.,0.715373133066229,1.00263556088558),
(1.,0.715175346796848,1.00263739232813),(1.,0.715074570650221,1.00263832548554),
(1.,0.714973861743568,1.00263925802033)))
REPRESENTATION_ITEM('')
SURFACE()
);
#58=(
BOUNDED_SURFACE()
B_SPLINE_SURFACE(3,2,((#37039,#37040,#37041),(#37042,#37043,#37044),(#37045,
#37046,#37047),(#37048,#37049,#37050),(#37051,#37052,#37053),(#37054,#37055,
#37056),(#37057,#37058,#37059),(#37060,#37061,#37062),(#37063,#37064,#37065),
(#37066,#37067,#37068),(#37069,#37070,#37071),(#37072,#37073,#37074),(#37075,
#37076,#37077),(#37078,#37079,#37080),(#37081,#37082,#37083),(#37084,#37085,
#37086),(#37087,#37088,#37089),(#37090,#37091,#37092)),.UNSPECIFIED.,.F.,
 .F.,.F.)
B_SPLINE_SURFACE_WITH_KNOTS((4,2,2,2,2,2,2,2,4),(3,3),(-0.00462985261013591,
0.197550098471654,0.395100196943307,0.592650295414961,0.790200393886615,
0.987750492358268,1.18530059082992,1.38285068930158,1.58040078777323),(0.,
1.00462985261014),.UNSPECIFIED.)
GEOMETRIC_REPRESENTATION_ITEM()
RATIONAL_B_SPLINE_SURFACE(((1.,0.716516123900143,1.00262497712738),(1.,
0.716516601620842,1.00262497270383),(1.,0.716506646250414,1.00262506488763),
(1.,0.716466742760981,1.00262543438218),(1.,0.716437258633571,1.00262570739651),
(1.,0.716359899787203,1.00262642371662),(1.,0.71631202696154,1.00262686700487),
(1.,0.716199740494825,1.00262790674445),(1.,0.716135329626742,1.00262850317011),
(1.,0.715992458216071,1.00262982611725),(1.,0.715914001218863,1.00263055260592),
(1.,0.715746075241928,1.00263210755097),(1.,0.715656610445083,1.00263293596861),
(1.,0.715470137017513,1.00263466265758),(1.,0.715373133066228,1.00263556088558),
(1.,0.715175346796848,1.00263739232813),(1.,0.71507457065022,1.00263832548554),
(1.,0.714973861743568,1.00263925802033)))
REPRESENTATION_ITEM('')
SURFACE()
);
#59=TOROIDAL_SURFACE('',#1611,49.237075720981,0.75);
#60=TOROIDAL_SURFACE('',#1622,18.3992704388194,0.5);
#61=TOROIDAL_SURFACE('',#1693,18.3992704388194,0.5);
#62=TOROIDAL_SURFACE('',#1701,18.3992704388194,0.5);
#63=TOROIDAL_SURFACE('',#1709,18.3992704388194,0.5);
#64=TOROIDAL_SURFACE('',#1728,18.3992704388194,0.5);
#65=TOROIDAL_SURFACE('',#1730,18.3992704388194,0.5);
#66=TOROIDAL_SURFACE('',#1735,18.3992704388194,0.5);
#67=TOROIDAL_SURFACE('',#1738,18.3992704388194,0.5);
#68=ELLIPSE('',#1598,17.4325234402637,15.2183886116288);
#69=ELLIPSE('',#1599,17.4380658307846,15.22772771204);
#70=ELLIPSE('',#1610,1.07856775224728,0.938224017735155);
#71=ELLIPSE('',#1617,50.8525448693542,50.852060457842);
#72=ELLIPSE('',#1620,50.8525448693542,50.852060457842);
#73=ELLIPSE('',#1624,0.500270426044498,0.499985975539733);
#74=ELLIPSE('',#1626,0.500270179760315,0.499985374484785);
#75=ELLIPSE('',#1631,2394.59444013006,27.6440530674931);
#76=ELLIPSE('',#1633,2394.47000909977,27.6428748898243);
#77=ELLIPSE('',#1635,2394.98921737159,27.6481266343262);
#78=ELLIPSE('',#1637,2394.74824986016,27.6457496582129);
#79=ELLIPSE('',#1639,2394.65992528436,27.6447299243303);
#80=ELLIPSE('',#1641,2394.8726244115,27.6470341387757);
#81=ELLIPSE('',#1643,2394.7013329163,27.6451561307538);
#82=ELLIPSE('',#1645,2394.59928950455,27.6442109358061);
#83=ELLIPSE('',#1646,2394.81036179339,27.6463906851812);
#84=ELLIPSE('',#1648,2394.77217242161,27.6458882286358);
#85=ELLIPSE('',#1650,2394.53876365494,27.6435856850201);
#86=ELLIPSE('',#1652,2394.60740681489,27.6441869840945);
#87=ELLIPSE('',#1654,2394.83623076068,27.6466583923622);
#88=ELLIPSE('',#1656,2394.72472510004,27.6453986455341);
#89=ELLIPSE('',#1658,2394.6570319591,27.6448068564402);
#90=ELLIPSE('',#1660,2394.90771405061,27.6472882962798);
#91=ELLIPSE('',#1663,47.1004482016859,47.0934382587023);
#92=ELLIPSE('',#1664,47.1004482016858,47.0934382587023);
#93=ELLIPSE('',#1667,1.08224076762508,0.927169618988372);
#94=ELLIPSE('',#1668,1.10841891161611,0.969738977721109);
#95=ELLIPSE('',#1669,1.08221691928949,0.927081267114025);
#96=ELLIPSE('',#1670,1.08221417186028,0.927048235121808);
#97=ELLIPSE('',#1671,1.08224382903225,0.927168226186757);
#98=ELLIPSE('',#1672,1.08220658045569,0.927066446303279);
#99=ELLIPSE('',#1673,1.08222404216103,0.927100179475605);
#100=ELLIPSE('',#1674,1.08221687927723,0.927052955543938);
#101=ELLIPSE('',#1675,1.08221765938232,0.927053113936422);
#102=ELLIPSE('',#1676,1.08223547052631,0.927150858784096);
#103=ELLIPSE('',#1677,1.08225455861164,0.926939029983221);
#104=ELLIPSE('',#1678,1.08232173791755,0.927144515820415);
#105=ELLIPSE('',#1679,1.08224202111623,0.926943949236559);
#106=ELLIPSE('',#1680,1.08227663873921,0.92700625292433);
#107=ELLIPSE('',#1681,1.08229778559852,0.927103625737148);
#108=ELLIPSE('',#1682,1.08226288677902,0.926974795765038);
#109=ELLIPSE('',#1683,1.08228317012871,0.927024683535424);
#110=ELLIPSE('',#1684,1.08229814955967,0.927101225347787);
#111=ELLIPSE('',#1685,1.08227298311443,0.926988948426923);
#112=ELLIPSE('',#1686,1.08227443405414,0.927016875642275);
#113=ELLIPSE('',#1687,1.08229900596289,0.927100541884433);
#114=ELLIPSE('',#1692,0.500270426044404,0.499985975539486);
#115=ELLIPSE('',#1694,0.500270179760375,0.499985374484942);
#116=ELLIPSE('',#1700,0.500270426044518,0.499985975539767);
#117=ELLIPSE('',#1702,0.50027017976046,0.499985374485131);
#118=ELLIPSE('',#1708,0.500270426044463,0.499985975539642);
#119=ELLIPSE('',#1710,0.500270179760253,0.499985374484683);
#120=ELLIPSE('',#1716,0.500270426044493,0.499985975539705);
#121=ELLIPSE('',#1718,0.50027017976033,0.4999853744848);
#122=ELLIPSE('',#1729,0.500270426044559,0.499985975539856);
#123=ELLIPSE('',#1731,0.500270179760292,0.499985374484734);
#124=ELLIPSE('',#1733,50.8525448693553,50.8520604578431);
#125=ELLIPSE('',#1736,0.500270179760379,0.499985374484921);
#126=ELLIPSE('',#1737,0.500270426044534,0.499985975539794);
#127=ELLIPSE('',#1739,0.500270179760313,0.499985374484799);
#128=ELLIPSE('',#1740,0.500270426044633,0.499985975540025);
#129=ELLIPSE('',#1742,50.8525448693553,50.8520604578431);
#130=B_SPLINE_SURFACE_WITH_KNOTS('',3,1,((#2155,#2156),(#2157,#2158),(#2159,
#2160),(#2161,#2162),(#2163,#2164),(#2165,#2166),(#2167,#2168),(#2169,#2170),
(#2171,#2172),(#2173,#2174),(#2175,#2176),(#2177,#2178),(#2179,#2180),(#2181,
#2182)),.UNSPECIFIED.,.F.,.F.,.F.,(4,2,2,2,2,2,4),(2,2),(1.92529423378357E-5,
0.490991706772874,0.870199236125707,1.24449170186374,1.61599060931136,2.01892118916933,
2.55106091572282),(0.,0.0993600000012712),.UNSPECIFIED.);
#131=B_SPLINE_SURFACE_WITH_KNOTS('',3,1,((#2217,#2218),(#2219,#2220),(#2221,
#2222),(#2223,#2224)),.UNSPECIFIED.,.F.,.F.,.F.,(4,4),(2,2),(2.18458352014992,
2.65228770493969),(0.,0.0993599999999997),.UNSPECIFIED.);
#132=B_SPLINE_SURFACE_WITH_KNOTS('',3,1,((#2265,#2266),(#2267,#2268),(#2269,
#2270),(#2271,#2272),(#2273,#2274),(#2275,#2276),(#2277,#2278),(#2279,#2280)),
 .UNSPECIFIED.,.F.,.F.,.F.,(4,2,2,4),(2,2),(2.3375697155446,2.66080614269327,
3.39389856714327,4.08518106334001),(0.,0.0993600000057242),
 .UNSPECIFIED.);
#133=B_SPLINE_SURFACE_WITH_KNOTS('',3,3,((#2327,#2328,#2329,#2330,#2331,
#2332,#2333,#2334,#2335,#2336,#2337,#2338,#2339,#2340,#2341,#2342,#2343,
#2344,#2345,#2346,#2347,#2348,#2349,#2350,#2351,#2352,#2353,#2354,#2355,
#2356,#2357,#2358,#2359,#2360,#2361,#2362,#2363,#2364,#2365,#2366,#2367,
#2368,#2369,#2370,#2371,#2372,#2373,#2374,#2375,#2376,#2377,#2378,#2379,
#2380,#2381,#2382,#2383,#2384,#2385,#2386,#2387,#2388,#2389,#2390,#2391,
#2392,#2393,#2394,#2395,#2396,#2397,#2398,#2399,#2400,#2401,#2402,#2403,
#2404,#2405,#2406,#2407,#2408,#2409,#2410,#2411,#2412,#2413),(#2414,#2415,
#2416,#2417,#2418,#2419,#2420,#2421,#2422,#2423,#2424,#2425,#2426,#2427,
#2428,#2429,#2430,#2431,#2432,#2433,#2434,#2435,#2436,#2437,#2438,#2439,
#2440,#2441,#2442,#2443,#2444,#2445,#2446,#2447,#2448,#2449,#2450,#2451,
#2452,#2453,#2454,#2455,#2456,#2457,#2458,#2459,#2460,#2461,#2462,#2463,
#2464,#2465,#2466,#2467,#2468,#2469,#2470,#2471,#2472,#2473,#2474,#2475,
#2476,#2477,#2478,#2479,#2480,#2481,#2482,#2483,#2484,#2485,#2486,#2487,
#2488,#2489,#2490,#2491,#2492,#2493,#2494,#2495,#2496,#2497,#2498,#2499,
#2500),(#2501,#2502,#2503,#2504,#2505,#2506,#2507,#2508,#2509,#2510,#2511,
#2512,#2513,#2514,#2515,#2516,#2517,#2518,#2519,#2520,#2521,#2522,#2523,
#2524,#2525,#2526,#2527,#2528,#2529,#2530,#2531,#2532,#2533,#2534,#2535,
#2536,#2537,#2538,#2539,#2540,#2541,#2542,#2543,#2544,#2545,#2546,#2547,
#2548,#2549,#2550,#2551,#2552,#2553,#2554,#2555,#2556,#2557,#2558,#2559,
#2560,#2561,#2562,#2563,#2564,#2565,#2566,#2567,#2568,#2569,#2570,#2571,
#2572,#2573,#2574,#2575,#2576,#2577,#2578,#2579,#2580,#2581,#2582,#2583,
#2584,#2585,#2586,#2587),(#2588,#2589,#2590,#2591,#2592,#2593,#2594,#2595,
#2596,#2597,#2598,#2599,#2600,#2601,#2602,#2603,#2604,#2605,#2606,#2607,
#2608,#2609,#2610,#2611,#2612,#2613,#2614,#2615,#2616,#2617,#2618,#2619,
#2620,#2621,#2622,#2623,#2624,#2625,#2626,#2627,#2628,#2629,#2630,#2631,
#2632,#2633,#2634,#2635,#2636,#2637,#2638,#2639,#2640,#2641,#2642,#2643,
#2644,#2645,#2646,#2647,#2648,#2649,#2650,#2651,#2652,#2653,#2654,#2655,
#2656,#2657,#2658,#2659,#2660,#2661,#2662,#2663,#2664,#2665,#2666,#2667,
#2668,#2669,#2670,#2671,#2672,#2673,#2674),(#2675,#2676,#2677,#2678,#2679,
#2680,#2681,#2682,#2683,#2684,#2685,#2686,#2687,#2688,#2689,#2690,#2691,
#2692,#2693,#2694,#2695,#2696,#2697,#2698,#2699,#2700,#2701,#2702,#2703,
#2704,#2705,#2706,#2707,#2708,#2709,#2710,#2711,#2712,#2713,#2714,#2715,
#2716,#2717,#2718,#2719,#2720,#2721,#2722,#2723,#2724,#2725,#2726,#2727,
#2728,#2729,#2730,#2731,#2732,#2733,#2734,#2735,#2736,#2737,#2738,#2739,
#2740,#2741,#2742,#2743,#2744,#2745,#2746,#2747,#2748,#2749,#2750,#2751,
#2752,#2753,#2754,#2755,#2756,#2757,#2758,#2759,#2760,#2761),(#2762,#2763,
#2764,#2765,#2766,#2767,#2768,#2769,#2770,#2771,#2772,#2773,#2774,#2775,
#2776,#2777,#2778,#2779,#2780,#2781,#2782,#2783,#2784,#2785,#2786,#2787,
#2788,#2789,#2790,#2791,#2792,#2793,#2794,#2795,#2796,#2797,#2798,#2799,
#2800,#2801,#2802,#2803,#2804,#2805,#2806,#2807,#2808,#2809,#2810,#2811,
#2812,#2813,#2814,#2815,#2816,#2817,#2818,#2819,#2820,#2821,#2822,#2823,
#2824,#2825,#2826,#2827,#2828,#2829,#2830,#2831,#2832,#2833,#2834,#2835,
#2836,#2837,#2838,#2839,#2840,#2841,#2842,#2843,#2844,#2845,#2846,#2847,
#2848),(#2849,#2850,#2851,#2852,#2853,#2854,#2855,#2856,#2857,#2858,#2859,
#2860,#2861,#2862,#2863,#2864,#2865,#2866,#2867,#2868,#2869,#2870,#2871,
#2872,#2873,#2874,#2875,#2876,#2877,#2878,#2879,#2880,#2881,#2882,#2883,
#2884,#2885,#2886,#2887,#2888,#2889,#2890,#2891,#2892,#2893,#2894,#2895,
#2896,#2897,#2898,#2899,#2900,#2901,#2902,#2903,#2904,#2905,#2906,#2907,
#2908,#2909,#2910,#2911,#2912,#2913,#2914,#2915,#2916,#2917,#2918,#2919,
#2920,#2921,#2922,#2923,#2924,#2925,#2926,#2927,#2928,#2929,#2930,#2931,
#2932,#2933,#2934,#2935),(#2936,#2937,#2938,#2939,#2940,#2941,#2942,#2943,
#2944,#2945,#2946,#2947,#2948,#2949,#2950,#2951,#2952,#2953,#2954,#2955,
#2956,#2957,#2958,#2959,#2960,#2961,#2962,#2963,#2964,#2965,#2966,#2967,
#2968,#2969,#2970,#2971,#2972,#2973,#2974,#2975,#2976,#2977,#2978,#2979,
#2980,#2981,#2982,#2983,#2984,#2985,#2986,#2987,#2988,#2989,#2990,#2991,
#2992,#2993,#2994,#2995,#2996,#2997,#2998,#2999,#3000,#3001,#3002,#3003,
#3004,#3005,#3006,#3007,#3008,#3009,#3010,#3011,#3012,#3013,#3014,#3015,
#3016,#3017,#3018,#3019,#3020,#3021,#3022),(#3023,#3024,#3025,#3026,#3027,
#3028,#3029,#3030,#3031,#3032,#3033,#3034,#3035,#3036,#3037,#3038,#3039,
#3040,#3041,#3042,#3043,#3044,#3045,#3046,#3047,#3048,#3049,#3050,#3051,
#3052,#3053,#3054,#3055,#3056,#3057,#3058,#3059,#3060,#3061,#3062,#3063,
#3064,#3065,#3066,#3067,#3068,#3069,#3070,#3071,#3072,#3073,#3074,#3075,
#3076,#3077,#3078,#3079,#3080,#3081,#3082,#3083,#3084,#3085,#3086,#3087,
#3088,#3089,#3090,#3091,#3092,#3093,#3094,#3095,#3096,#3097,#3098,#3099,
#3100,#3101,#3102,#3103,#3104,#3105,#3106,#3107,#3108,#3109),(#3110,#3111,
#3112,#3113,#3114,#3115,#3116,#3117,#3118,#3119,#3120,#3121,#3122,#3123,
#3124,#3125,#3126,#3127,#3128,#3129,#3130,#3131,#3132,#3133,#3134,#3135,
#3136,#3137,#3138,#3139,#3140,#3141,#3142,#3143,#3144,#3145,#3146,#3147,
#3148,#3149,#3150,#3151,#3152,#3153,#3154,#3155,#3156,#3157,#3158,#3159,
#3160,#3161,#3162,#3163,#3164,#3165,#3166,#3167,#3168,#3169,#3170,#3171,
#3172,#3173,#3174,#3175,#3176,#3177,#3178,#3179,#3180,#3181,#3182,#3183,
#3184,#3185,#3186,#3187,#3188,#3189,#3190,#3191,#3192,#3193,#3194,#3195,
#3196),(#3197,#3198,#3199,#3200,#3201,#3202,#3203,#3204,#3205,#3206,#3207,
#3208,#3209,#3210,#3211,#3212,#3213,#3214,#3215,#3216,#3217,#3218,#3219,
#3220,#3221,#3222,#3223,#3224,#3225,#3226,#3227,#3228,#3229,#3230,#3231,
#3232,#3233,#3234,#3235,#3236,#3237,#3238,#3239,#3240,#3241,#3242,#3243,
#3244,#3245,#3246,#3247,#3248,#3249,#3250,#3251,#3252,#3253,#3254,#3255,
#3256,#3257,#3258,#3259,#3260,#3261,#3262,#3263,#3264,#3265,#3266,#3267,
#3268,#3269,#3270,#3271,#3272,#3273,#3274,#3275,#3276,#3277,#3278,#3279,
#3280,#3281,#3282,#3283),(#3284,#3285,#3286,#3287,#3288,#3289,#3290,#3291,
#3292,#3293,#3294,#3295,#3296,#3297,#3298,#3299,#3300,#3301,#3302,#3303,
#3304,#3305,#3306,#3307,#3308,#3309,#3310,#3311,#3312,#3313,#3314,#3315,
#3316,#3317,#3318,#3319,#3320,#3321,#3322,#3323,#3324,#3325,#3326,#3327,
#3328,#3329,#3330,#3331,#3332,#3333,#3334,#3335,#3336,#3337,#3338,#3339,
#3340,#3341,#3342,#3343,#3344,#3345,#3346,#3347,#3348,#3349,#3350,#3351,
#3352,#3353,#3354,#3355,#3356,#3357,#3358,#3359,#3360,#3361,#3362,#3363,
#3364,#3365,#3366,#3367,#3368,#3369,#3370)),.UNSPECIFIED.,.F.,.F.,.F.,(4,
3,1,1,3,4),(4,1,1,1,1,1,1,1,1,1,1,1,1,1,1,1,1,1,1,1,1,1,1,1,1,1,1,1,1,1,
1,1,1,1,1,1,1,1,1,1,1,1,1,1,1,1,1,1,1,1,1,1,1,1,1,1,1,1,1,1,1,1,1,1,1,1,
1,1,1,1,1,1,1,1,1,1,1,1,1,1,1,1,1,1,4),(-0.855237294951358,-0.838467936226788,
-0.119781133745207,0.359343401242513,0.838467936230234,0.85540498854205),
(32.7241439763348,33.2152755694897,33.7064071626446,34.1975387557996,34.6886703489545,
35.1798019421094,35.6709335352643,36.1620651284192,36.6531967215741,37.1443283147291,
37.635459907884,38.1265915010389,38.6177230941938,39.1088546873487,39.5999862805036,
40.0911178736586,40.5822494668135,41.0733810599684,41.5645126531233,42.0556442462782,
42.5467758394332,43.0379074325881,43.529039025743,44.0201706188979,44.5113022120528,
45.0024338052078,45.4935653983627,45.9846969915176,46.4758285846725,46.9669601778274,
47.4580917709823,47.9492233641373,48.4403549572922,48.9314865504471,49.422618143602,
49.9137497367569,50.4048813299118,50.8960129230668,51.3871445162217,51.8782761093766,
52.3694077025315,52.8605392956864,53.3516708888414,53.8428024819963,54.3339340751512,
54.8250656683061,55.316197261461,55.8073288546159,56.2984604477709,56.7895920409258,
57.2807236340807,57.7718552272356,58.2629868203905,58.7541184135455,59.2452500067004,
59.7363815998553,60.2275131930102,60.7186447861651,61.20977637932,61.700907972475,
62.1920395656299,62.6831711587848,63.1743027519397,63.6654343450946,64.1565659382495,
64.6476975314045,65.1388291245594,65.6299607177143,66.1210923108692,66.6122239040241,
67.1033554971791,67.594487090334,68.0856186834889,68.5767502766438,69.0678818697987,
69.5590134629536,70.0501450561086,70.5412766492635,71.0324082424184,71.5235398355733,
72.0146714287282,72.5058030218832,72.9969346150381,73.488066208193,73.9791978013479),
 .UNSPECIFIED.);
#134=B_SPLINE_SURFACE_WITH_KNOTS('',3,3,((#3682,#3683,#3684,#3685,#3686,
#3687,#3688,#3689,#3690,#3691,#3692,#3693,#3694,#3695,#3696,#3697,#3698),
(#3699,#3700,#3701,#3702,#3703,#3704,#3705,#3706,#3707,#3708,#3709,#3710,
#3711,#3712,#3713,#3714,#3715),(#3716,#3717,#3718,#3719,#3720,#3721,#3722,
#3723,#3724,#3725,#3726,#3727,#3728,#3729,#3730,#3731,#3732),(#3733,#3734,
#3735,#3736,#3737,#3738,#3739,#3740,#3741,#3742,#3743,#3744,#3745,#3746,
#3747,#3748,#3749),(#3750,#3751,#3752,#3753,#3754,#3755,#3756,#3757,#3758,
#3759,#3760,#3761,#3762,#3763,#3764,#3765,#3766),(#3767,#3768,#3769,#3770,
#3771,#3772,#3773,#3774,#3775,#3776,#3777,#3778,#3779,#3780,#3781,#3782,
#3783),(#3784,#3785,#3786,#3787,#3788,#3789,#3790,#3791,#3792,#3793,#3794,
#3795,#3796,#3797,#3798,#3799,#3800),(#3801,#3802,#3803,#3804,#3805,#3806,
#3807,#3808,#3809,#3810,#3811,#3812,#3813,#3814,#3815,#3816,#3817),(#3818,
#3819,#3820,#3821,#3822,#3823,#3824,#3825,#3826,#3827,#3828,#3829,#3830,
#3831,#3832,#3833,#3834),(#3835,#3836,#3837,#3838,#3839,#3840,#3841,#3842,
#3843,#3844,#3845,#3846,#3847,#3848,#3849,#3850,#3851),(#3852,#3853,#3854,
#3855,#3856,#3857,#3858,#3859,#3860,#3861,#3862,#3863,#3864,#3865,#3866,
#3867,#3868),(#3869,#3870,#3871,#3872,#3873,#3874,#3875,#3876,#3877,#3878,
#3879,#3880,#3881,#3882,#3883,#3884,#3885),(#3886,#3887,#3888,#3889,#3890,
#3891,#3892,#3893,#3894,#3895,#3896,#3897,#3898,#3899,#3900,#3901,#3902)),
 .UNSPECIFIED.,.F.,.F.,.F.,(4,3,1,1,1,3,4),(4,1,1,1,1,1,1,1,1,1,1,1,1,1,
4),(-0.01,0.,0.285714285714286,0.571428571428571,0.785714285714286,1.,1.0101),
(0.0267091305739391,0.780566707095643,1.53442428361735,2.28828186013905,
3.04213943666075,3.54471115434189,4.54985458970416,5.0524263073853,6.05756974274757,
6.56014146042871,7.56528489579098,8.06785661347211,9.07300004883439,9.82685762535609,
10.5807152018778),.UNSPECIFIED.);
#135=B_SPLINE_SURFACE_WITH_KNOTS('',3,3,((#3919,#3920,#3921,#3922,#3923,
#3924,#3925,#3926,#3927,#3928,#3929,#3930,#3931,#3932,#3933,#3934,#3935),
(#3936,#3937,#3938,#3939,#3940,#3941,#3942,#3943,#3944,#3945,#3946,#3947,
#3948,#3949,#3950,#3951,#3952),(#3953,#3954,#3955,#3956,#3957,#3958,#3959,
#3960,#3961,#3962,#3963,#3964,#3965,#3966,#3967,#3968,#3969),(#3970,#3971,
#3972,#3973,#3974,#3975,#3976,#3977,#3978,#3979,#3980,#3981,#3982,#3983,
#3984,#3985,#3986),(#3987,#3988,#3989,#3990,#3991,#3992,#3993,#3994,#3995,
#3996,#3997,#3998,#3999,#4000,#4001,#4002,#4003),(#4004,#4005,#4006,#4007,
#4008,#4009,#4010,#4011,#4012,#4013,#4014,#4015,#4016,#4017,#4018,#4019,
#4020),(#4021,#4022,#4023,#4024,#4025,#4026,#4027,#4028,#4029,#4030,#4031,
#4032,#4033,#4034,#4035,#4036,#4037),(#4038,#4039,#4040,#4041,#4042,#4043,
#4044,#4045,#4046,#4047,#4048,#4049,#4050,#4051,#4052,#4053,#4054),(#4055,
#4056,#4057,#4058,#4059,#4060,#4061,#4062,#4063,#4064,#4065,#4066,#4067,
#4068,#4069,#4070,#4071),(#4072,#4073,#4074,#4075,#4076,#4077,#4078,#4079,
#4080,#4081,#4082,#4083,#4084,#4085,#4086,#4087,#4088),(#4089,#4090,#4091,
#4092,#4093,#4094,#4095,#4096,#4097,#4098,#4099,#4100,#4101,#4102,#4103,
#4104,#4105),(#4106,#4107,#4108,#4109,#4110,#4111,#4112,#4113,#4114,#4115,
#4116,#4117,#4118,#4119,#4120,#4121,#4122),(#4123,#4124,#4125,#4126,#4127,
#4128,#4129,#4130,#4131,#4132,#4133,#4134,#4135,#4136,#4137,#4138,#4139)),
 .UNSPECIFIED.,.F.,.F.,.F.,(4,3,1,1,1,3,4),(4,1,1,1,1,1,1,1,1,1,1,1,1,1,
4),(-0.01,0.,0.285714285714286,0.571428571428571,0.785714285714286,1.,1.0101),
(0.0267091305739391,0.780566707095643,1.53442428361735,2.28828186013905,
3.04213943666075,3.54471115434189,4.54985458970416,5.0524263073853,6.05756974274757,
6.56014146042871,7.56528489579098,8.06785661347211,9.07300004883439,9.82685762535609,
10.5807911477737),.UNSPECIFIED.);
#136=B_SPLINE_SURFACE_WITH_KNOTS('',3,3,((#4992,#4993,#4994,#4995,#4996,
#4997,#4998,#4999,#5000,#5001,#5002,#5003,#5004,#5005,#5006,#5007,#5008,
#5009,#5010,#5011,#5012,#5013,#5014,#5015,#5016,#5017,#5018,#5019,#5020,
#5021,#5022,#5023,#5024,#5025,#5026,#5027,#5028,#5029,#5030,#5031,#5032,
#5033,#5034,#5035,#5036,#5037,#5038,#5039,#5040,#5041,#5042,#5043,#5044,
#5045,#5046,#5047,#5048,#5049,#5050,#5051,#5052,#5053,#5054,#5055,#5056,
#5057,#5058,#5059,#5060,#5061,#5062,#5063,#5064,#5065,#5066,#5067,#5068,
#5069,#5070,#5071,#5072,#5073,#5074),(#5075,#5076,#5077,#5078,#5079,#5080,
#5081,#5082,#5083,#5084,#5085,#5086,#5087,#5088,#5089,#5090,#5091,#5092,
#5093,#5094,#5095,#5096,#5097,#5098,#5099,#5100,#5101,#5102,#5103,#5104,
#5105,#5106,#5107,#5108,#5109,#5110,#5111,#5112,#5113,#5114,#5115,#5116,
#5117,#5118,#5119,#5120,#5121,#5122,#5123,#5124,#5125,#5126,#5127,#5128,
#5129,#5130,#5131,#5132,#5133,#5134,#5135,#5136,#5137,#5138,#5139,#5140,
#5141,#5142,#5143,#5144,#5145,#5146,#5147,#5148,#5149,#5150,#5151,#5152,
#5153,#5154,#5155,#5156,#5157),(#5158,#5159,#5160,#5161,#5162,#5163,#5164,
#5165,#5166,#5167,#5168,#5169,#5170,#5171,#5172,#5173,#5174,#5175,#5176,
#5177,#5178,#5179,#5180,#5181,#5182,#5183,#5184,#5185,#5186,#5187,#5188,
#5189,#5190,#5191,#5192,#5193,#5194,#5195,#5196,#5197,#5198,#5199,#5200,
#5201,#5202,#5203,#5204,#5205,#5206,#5207,#5208,#5209,#5210,#5211,#5212,
#5213,#5214,#5215,#5216,#5217,#5218,#5219,#5220,#5221,#5222,#5223,#5224,
#5225,#5226,#5227,#5228,#5229,#5230,#5231,#5232,#5233,#5234,#5235,#5236,
#5237,#5238,#5239,#5240),(#5241,#5242,#5243,#5244,#5245,#5246,#5247,#5248,
#5249,#5250,#5251,#5252,#5253,#5254,#5255,#5256,#5257,#5258,#5259,#5260,
#5261,#5262,#5263,#5264,#5265,#5266,#5267,#5268,#5269,#5270,#5271,#5272,
#5273,#5274,#5275,#5276,#5277,#5278,#5279,#5280,#5281,#5282,#5283,#5284,
#5285,#5286,#5287,#5288,#5289,#5290,#5291,#5292,#5293,#5294,#5295,#5296,
#5297,#5298,#5299,#5300,#5301,#5302,#5303,#5304,#5305,#5306,#5307,#5308,
#5309,#5310,#5311,#5312,#5313,#5314,#5315,#5316,#5317,#5318,#5319,#5320,
#5321,#5322,#5323),(#5324,#5325,#5326,#5327,#5328,#5329,#5330,#5331,#5332,
#5333,#5334,#5335,#5336,#5337,#5338,#5339,#5340,#5341,#5342,#5343,#5344,
#5345,#5346,#5347,#5348,#5349,#5350,#5351,#5352,#5353,#5354,#5355,#5356,
#5357,#5358,#5359,#5360,#5361,#5362,#5363,#5364,#5365,#5366,#5367,#5368,
#5369,#5370,#5371,#5372,#5373,#5374,#5375,#5376,#5377,#5378,#5379,#5380,
#5381,#5382,#5383,#5384,#5385,#5386,#5387,#5388,#5389,#5390,#5391,#5392,
#5393,#5394,#5395,#5396,#5397,#5398,#5399,#5400,#5401,#5402,#5403,#5404,
#5405,#5406),(#5407,#5408,#5409,#5410,#5411,#5412,#5413,#5414,#5415,#5416,
#5417,#5418,#5419,#5420,#5421,#5422,#5423,#5424,#5425,#5426,#5427,#5428,
#5429,#5430,#5431,#5432,#5433,#5434,#5435,#5436,#5437,#5438,#5439,#5440,
#5441,#5442,#5443,#5444,#5445,#5446,#5447,#5448,#5449,#5450,#5451,#5452,
#5453,#5454,#5455,#5456,#5457,#5458,#5459,#5460,#5461,#5462,#5463,#5464,
#5465,#5466,#5467,#5468,#5469,#5470,#5471,#5472,#5473,#5474,#5475,#5476,
#5477,#5478,#5479,#5480,#5481,#5482,#5483,#5484,#5485,#5486,#5487,#5488,
#5489),(#5490,#5491,#5492,#5493,#5494,#5495,#5496,#5497,#5498,#5499,#5500,
#5501,#5502,#5503,#5504,#5505,#5506,#5507,#5508,#5509,#5510,#5511,#5512,
#5513,#5514,#5515,#5516,#5517,#5518,#5519,#5520,#5521,#5522,#5523,#5524,
#5525,#5526,#5527,#5528,#5529,#5530,#5531,#5532,#5533,#5534,#5535,#5536,
#5537,#5538,#5539,#5540,#5541,#5542,#5543,#5544,#5545,#5546,#5547,#5548,
#5549,#5550,#5551,#5552,#5553,#5554,#5555,#5556,#5557,#5558,#5559,#5560,
#5561,#5562,#5563,#5564,#5565,#5566,#5567,#5568,#5569,#5570,#5571,#5572)),
 .UNSPECIFIED.,.F.,.F.,.F.,(4,3,4),(4,1,1,1,1,1,1,1,1,1,1,1,1,1,1,1,1,1,
1,1,1,1,1,1,1,1,1,1,1,1,1,1,1,1,1,1,1,1,1,1,1,1,1,1,1,1,1,1,1,1,1,1,1,1,
1,1,1,1,1,1,1,1,1,1,1,1,1,1,1,1,1,1,1,1,1,1,1,1,1,1,4),(-3.1416141437338,
-2.31918842711196,-2.31096438484718),(37.4480614519116,37.9436823521751,
38.4393032524387,38.9349241527022,39.4305450529657,39.9261659532292,40.4217868534927,
40.9174077537563,41.4130286540198,41.9086495542833,42.4042704545468,42.8998913548104,
43.3955122550739,43.8911331553374,44.3867540556009,44.8823749558644,45.377995856128,
45.8736167563915,46.369237656655,46.8648585569185,47.3604794571821,47.8561003574456,
48.3517212577091,48.8473421579726,49.3429630582362,49.8385839584997,50.3342048587632,
50.8298257590267,51.3254466592902,51.8210675595538,52.3166884598173,52.8123093600808,
53.3079302603443,53.8035511606079,54.2991720608714,54.7947929611349,55.2904138613984,
55.7860347616619,56.2816556619255,56.777276562189,57.2728974624525,57.768518362716,
58.2641392629795,58.7597601632431,59.2553810635066,59.7510019637701,60.2466228640336,
60.7422437642972,61.2378646645607,61.7334855648242,62.2291064650877,62.7247273653512,
63.2203482656148,63.7159691658783,64.2115900661418,64.7072109664053,65.2028318666689,
65.6984527669324,66.1940736671959,66.6896945674594,67.1853154677229,67.6809363679865,
68.17655726825,68.6721781685135,69.167799068777,69.6634199690406,70.1590408693041,
70.6546617695676,71.1502826698311,71.6459035700946,72.1415244703582,72.6371453706217,
73.1327662708852,73.6283871711487,74.1240080714123,74.6196289716758,75.1152498719393,
75.6108707722028,76.1064916724663,76.6021125727299,77.0977334729934),
 .UNSPECIFIED.);
#137=B_SPLINE_SURFACE_WITH_KNOTS('',3,3,((#5876,#5877,#5878,#5879,#5880,
#5881,#5882,#5883,#5884,#5885,#5886,#5887,#5888,#5889,#5890,#5891,#5892,
#5893,#5894,#5895,#5896,#5897,#5898,#5899,#5900,#5901,#5902,#5903,#5904,
#5905,#5906,#5907,#5908,#5909,#5910,#5911,#5912,#5913,#5914,#5915,#5916,
#5917,#5918,#5919,#5920,#5921,#5922,#5923,#5924,#5925,#5926,#5927,#5928,
#5929,#5930,#5931,#5932,#5933,#5934,#5935,#5936,#5937,#5938,#5939,#5940,
#5941,#5942,#5943,#5944,#5945,#5946,#5947,#5948,#5949,#5950,#5951,#5952,
#5953,#5954,#5955,#5956,#5957,#5958),(#5959,#5960,#5961,#5962,#5963,#5964,
#5965,#5966,#5967,#5968,#5969,#5970,#5971,#5972,#5973,#5974,#5975,#5976,
#5977,#5978,#5979,#5980,#5981,#5982,#5983,#5984,#5985,#5986,#5987,#5988,
#5989,#5990,#5991,#5992,#5993,#5994,#5995,#5996,#5997,#5998,#5999,#6000,
#6001,#6002,#6003,#6004,#6005,#6006,#6007,#6008,#6009,#6010,#6011,#6012,
#6013,#6014,#6015,#6016,#6017,#6018,#6019,#6020,#6021,#6022,#6023,#6024,
#6025,#6026,#6027,#6028,#6029,#6030,#6031,#6032,#6033,#6034,#6035,#6036,
#6037,#6038,#6039,#6040,#6041),(#6042,#6043,#6044,#6045,#6046,#6047,#6048,
#6049,#6050,#6051,#6052,#6053,#6054,#6055,#6056,#6057,#6058,#6059,#6060,
#6061,#6062,#6063,#6064,#6065,#6066,#6067,#6068,#6069,#6070,#6071,#6072,
#6073,#6074,#6075,#6076,#6077,#6078,#6079,#6080,#6081,#6082,#6083,#6084,
#6085,#6086,#6087,#6088,#6089,#6090,#6091,#6092,#6093,#6094,#6095,#6096,
#6097,#6098,#6099,#6100,#6101,#6102,#6103,#6104,#6105,#6106,#6107,#6108,
#6109,#6110,#6111,#6112,#6113,#6114,#6115,#6116,#6117,#6118,#6119,#6120,
#6121,#6122,#6123,#6124),(#6125,#6126,#6127,#6128,#6129,#6130,#6131,#6132,
#6133,#6134,#6135,#6136,#6137,#6138,#6139,#6140,#6141,#6142,#6143,#6144,
#6145,#6146,#6147,#6148,#6149,#6150,#6151,#6152,#6153,#6154,#6155,#6156,
#6157,#6158,#6159,#6160,#6161,#6162,#6163,#6164,#6165,#6166,#6167,#6168,
#6169,#6170,#6171,#6172,#6173,#6174,#6175,#6176,#6177,#6178,#6179,#6180,
#6181,#6182,#6183,#6184,#6185,#6186,#6187,#6188,#6189,#6190,#6191,#6192,
#6193,#6194,#6195,#6196,#6197,#6198,#6199,#6200,#6201,#6202,#6203,#6204,
#6205,#6206,#6207),(#6208,#6209,#6210,#6211,#6212,#6213,#6214,#6215,#6216,
#6217,#6218,#6219,#6220,#6221,#6222,#6223,#6224,#6225,#6226,#6227,#6228,
#6229,#6230,#6231,#6232,#6233,#6234,#6235,#6236,#6237,#6238,#6239,#6240,
#6241,#6242,#6243,#6244,#6245,#6246,#6247,#6248,#6249,#6250,#6251,#6252,
#6253,#6254,#6255,#6256,#6257,#6258,#6259,#6260,#6261,#6262,#6263,#6264,
#6265,#6266,#6267,#6268,#6269,#6270,#6271,#6272,#6273,#6274,#6275,#6276,
#6277,#6278,#6279,#6280,#6281,#6282,#6283,#6284,#6285,#6286,#6287,#6288,
#6289,#6290),(#6291,#6292,#6293,#6294,#6295,#6296,#6297,#6298,#6299,#6300,
#6301,#6302,#6303,#6304,#6305,#6306,#6307,#6308,#6309,#6310,#6311,#6312,
#6313,#6314,#6315,#6316,#6317,#6318,#6319,#6320,#6321,#6322,#6323,#6324,
#6325,#6326,#6327,#6328,#6329,#6330,#6331,#6332,#6333,#6334,#6335,#6336,
#6337,#6338,#6339,#6340,#6341,#6342,#6343,#6344,#6345,#6346,#6347,#6348,
#6349,#6350,#6351,#6352,#6353,#6354,#6355,#6356,#6357,#6358,#6359,#6360,
#6361,#6362,#6363,#6364,#6365,#6366,#6367,#6368,#6369,#6370,#6371,#6372,
#6373),(#6374,#6375,#6376,#6377,#6378,#6379,#6380,#6381,#6382,#6383,#6384,
#6385,#6386,#6387,#6388,#6389,#6390,#6391,#6392,#6393,#6394,#6395,#6396,
#6397,#6398,#6399,#6400,#6401,#6402,#6403,#6404,#6405,#6406,#6407,#6408,
#6409,#6410,#6411,#6412,#6413,#6414,#6415,#6416,#6417,#6418,#6419,#6420,
#6421,#6422,#6423,#6424,#6425,#6426,#6427,#6428,#6429,#6430,#6431,#6432,
#6433,#6434,#6435,#6436,#6437,#6438,#6439,#6440,#6441,#6442,#6443,#6444,
#6445,#6446,#6447,#6448,#6449,#6450,#6451,#6452,#6453,#6454,#6455,#6456)),
 .UNSPECIFIED.,.F.,.F.,.F.,(4,3,4),(4,1,1,1,1,1,1,1,1,1,1,1,1,1,1,1,1,1,
1,1,1,1,1,1,1,1,1,1,1,1,1,1,1,1,1,1,1,1,1,1,1,1,1,1,1,1,1,1,1,1,1,1,1,1,
1,1,1,1,1,1,1,1,1,1,1,1,1,1,1,1,1,1,1,1,1,1,1,1,1,1,4),(-3.14160445015778,
-2.31918842711196,-2.31096438484718),(37.4480614519116,37.9436823521751,
38.4393032524387,38.9349241527022,39.4305450529657,39.9261659532292,40.4217868534927,
40.9174077537563,41.4130286540198,41.9086495542833,42.4042704545468,42.8998913548104,
43.3955122550739,43.8911331553374,44.3867540556009,44.8823749558644,45.377995856128,
45.8736167563915,46.369237656655,46.8648585569185,47.3604794571821,47.8561003574456,
48.3517212577091,48.8473421579726,49.3429630582362,49.8385839584997,50.3342048587632,
50.8298257590267,51.3254466592902,51.8210675595538,52.3166884598173,52.8123093600808,
53.3079302603443,53.8035511606079,54.2991720608714,54.7947929611349,55.2904138613984,
55.7860347616619,56.2816556619255,56.777276562189,57.2728974624525,57.768518362716,
58.2641392629795,58.7597601632431,59.2553810635066,59.7510019637701,60.2466228640336,
60.7422437642972,61.2378646645607,61.7334855648242,62.2291064650877,62.7247273653512,
63.2203482656148,63.7159691658783,64.2115900661418,64.7072109664053,65.2028318666689,
65.6984527669324,66.1940736671959,66.6896945674594,67.1853154677229,67.6809363679865,
68.17655726825,68.6721781685135,69.167799068777,69.6634199690406,70.1590408693041,
70.6546617695676,71.1502826698311,71.6459035700946,72.1415244703582,72.6371453706217,
73.1327662708852,73.6283871711487,74.1240080714123,74.6196289716758,75.1152498719393,
75.6108707722028,76.1064916724663,76.6021125727299,77.0977334729934),
 .UNSPECIFIED.);
#138=B_SPLINE_SURFACE_WITH_KNOTS('',3,3,((#6747,#6748,#6749,#6750,#6751,
#6752,#6753,#6754,#6755,#6756,#6757,#6758,#6759,#6760,#6761,#6762,#6763,
#6764,#6765,#6766,#6767,#6768,#6769,#6770,#6771,#6772,#6773,#6774,#6775,
#6776,#6777,#6778,#6779,#6780,#6781,#6782,#6783,#6784,#6785,#6786,#6787,
#6788,#6789,#6790,#6791,#6792,#6793,#6794,#6795,#6796,#6797,#6798,#6799,
#6800,#6801,#6802,#6803,#6804,#6805,#6806,#6807,#6808,#6809,#6810,#6811,
#6812,#6813,#6814,#6815,#6816,#6817,#6818,#6819,#6820,#6821,#6822,#6823,
#6824,#6825,#6826,#6827,#6828,#6829),(#6830,#6831,#6832,#6833,#6834,#6835,
#6836,#6837,#6838,#6839,#6840,#6841,#6842,#6843,#6844,#6845,#6846,#6847,
#6848,#6849,#6850,#6851,#6852,#6853,#6854,#6855,#6856,#6857,#6858,#6859,
#6860,#6861,#6862,#6863,#6864,#6865,#6866,#6867,#6868,#6869,#6870,#6871,
#6872,#6873,#6874,#6875,#6876,#6877,#6878,#6879,#6880,#6881,#6882,#6883,
#6884,#6885,#6886,#6887,#6888,#6889,#6890,#6891,#6892,#6893,#6894,#6895,
#6896,#6897,#6898,#6899,#6900,#6901,#6902,#6903,#6904,#6905,#6906,#6907,
#6908,#6909,#6910,#6911,#6912),(#6913,#6914,#6915,#6916,#6917,#6918,#6919,
#6920,#6921,#6922,#6923,#6924,#6925,#6926,#6927,#6928,#6929,#6930,#6931,
#6932,#6933,#6934,#6935,#6936,#6937,#6938,#6939,#6940,#6941,#6942,#6943,
#6944,#6945,#6946,#6947,#6948,#6949,#6950,#6951,#6952,#6953,#6954,#6955,
#6956,#6957,#6958,#6959,#6960,#6961,#6962,#6963,#6964,#6965,#6966,#6967,
#6968,#6969,#6970,#6971,#6972,#6973,#6974,#6975,#6976,#6977,#6978,#6979,
#6980,#6981,#6982,#6983,#6984,#6985,#6986,#6987,#6988,#6989,#6990,#6991,
#6992,#6993,#6994,#6995),(#6996,#6997,#6998,#6999,#7000,#7001,#7002,#7003,
#7004,#7005,#7006,#7007,#7008,#7009,#7010,#7011,#7012,#7013,#7014,#7015,
#7016,#7017,#7018,#7019,#7020,#7021,#7022,#7023,#7024,#7025,#7026,#7027,
#7028,#7029,#7030,#7031,#7032,#7033,#7034,#7035,#7036,#7037,#7038,#7039,
#7040,#7041,#7042,#7043,#7044,#7045,#7046,#7047,#7048,#7049,#7050,#7051,
#7052,#7053,#7054,#7055,#7056,#7057,#7058,#7059,#7060,#7061,#7062,#7063,
#7064,#7065,#7066,#7067,#7068,#7069,#7070,#7071,#7072,#7073,#7074,#7075,
#7076,#7077,#7078),(#7079,#7080,#7081,#7082,#7083,#7084,#7085,#7086,#7087,
#7088,#7089,#7090,#7091,#7092,#7093,#7094,#7095,#7096,#7097,#7098,#7099,
#7100,#7101,#7102,#7103,#7104,#7105,#7106,#7107,#7108,#7109,#7110,#7111,
#7112,#7113,#7114,#7115,#7116,#7117,#7118,#7119,#7120,#7121,#7122,#7123,
#7124,#7125,#7126,#7127,#7128,#7129,#7130,#7131,#7132,#7133,#7134,#7135,
#7136,#7137,#7138,#7139,#7140,#7141,#7142,#7143,#7144,#7145,#7146,#7147,
#7148,#7149,#7150,#7151,#7152,#7153,#7154,#7155,#7156,#7157,#7158,#7159,
#7160,#7161),(#7162,#7163,#7164,#7165,#7166,#7167,#7168,#7169,#7170,#7171,
#7172,#7173,#7174,#7175,#7176,#7177,#7178,#7179,#7180,#7181,#7182,#7183,
#7184,#7185,#7186,#7187,#7188,#7189,#7190,#7191,#7192,#7193,#7194,#7195,
#7196,#7197,#7198,#7199,#7200,#7201,#7202,#7203,#7204,#7205,#7206,#7207,
#7208,#7209,#7210,#7211,#7212,#7213,#7214,#7215,#7216,#7217,#7218,#7219,
#7220,#7221,#7222,#7223,#7224,#7225,#7226,#7227,#7228,#7229,#7230,#7231,
#7232,#7233,#7234,#7235,#7236,#7237,#7238,#7239,#7240,#7241,#7242,#7243,
#7244),(#7245,#7246,#7247,#7248,#7249,#7250,#7251,#7252,#7253,#7254,#7255,
#7256,#7257,#7258,#7259,#7260,#7261,#7262,#7263,#7264,#7265,#7266,#7267,
#7268,#7269,#7270,#7271,#7272,#7273,#7274,#7275,#7276,#7277,#7278,#7279,
#7280,#7281,#7282,#7283,#7284,#7285,#7286,#7287,#7288,#7289,#7290,#7291,
#7292,#7293,#7294,#7295,#7296,#7297,#7298,#7299,#7300,#7301,#7302,#7303,
#7304,#7305,#7306,#7307,#7308,#7309,#7310,#7311,#7312,#7313,#7314,#7315,
#7316,#7317,#7318,#7319,#7320,#7321,#7322,#7323,#7324,#7325,#7326,#7327)),
 .UNSPECIFIED.,.F.,.F.,.F.,(4,3,4),(4,1,1,1,1,1,1,1,1,1,1,1,1,1,1,1,1,1,
1,1,1,1,1,1,1,1,1,1,1,1,1,1,1,1,1,1,1,1,1,1,1,1,1,1,1,1,1,1,1,1,1,1,1,1,
1,1,1,1,1,1,1,1,1,1,1,1,1,1,1,1,1,1,1,1,1,1,1,1,1,1,4),(-3.14159265358979,
-2.31918842711196,-2.31096438484718),(37.4480614519116,37.9436823521751,
38.4393032524387,38.9349241527022,39.4305450529657,39.9261659532292,40.4217868534927,
40.9174077537563,41.4130286540198,41.9086495542833,42.4042704545468,42.8998913548104,
43.3955122550739,43.8911331553374,44.3867540556009,44.8823749558644,45.377995856128,
45.8736167563915,46.369237656655,46.8648585569185,47.3604794571821,47.8561003574456,
48.3517212577091,48.8473421579726,49.3429630582362,49.8385839584997,50.3342048587632,
50.8298257590267,51.3254466592902,51.8210675595538,52.3166884598173,52.8123093600808,
53.3079302603443,53.8035511606079,54.2991720608714,54.7947929611349,55.2904138613984,
55.7860347616619,56.2816556619255,56.777276562189,57.2728974624525,57.768518362716,
58.2641392629795,58.7597601632431,59.2553810635066,59.7510019637701,60.2466228640336,
60.7422437642972,61.2378646645607,61.7334855648242,62.2291064650877,62.7247273653512,
63.2203482656148,63.7159691658783,64.2115900661418,64.7072109664053,65.2028318666689,
65.6984527669324,66.1940736671959,66.6896945674594,67.1853154677229,67.6809363679865,
68.17655726825,68.6721781685135,69.167799068777,69.6634199690406,70.1590408693041,
70.6546617695676,71.1502826698311,71.6459035700946,72.1415244703582,72.6371453706217,
73.1327662708852,73.6283871711487,74.1240080714123,74.6196289716758,75.1152498719393,
75.6108707722028,76.1064916724663,76.6021125727299,77.0977334729934),
 .UNSPECIFIED.);
#139=B_SPLINE_SURFACE_WITH_KNOTS('',3,3,((#7603,#7604,#7605,#7606,#7607,
#7608,#7609,#7610,#7611,#7612,#7613,#7614,#7615,#7616,#7617,#7618,#7619,
#7620,#7621,#7622,#7623,#7624,#7625,#7626,#7627,#7628,#7629,#7630,#7631,
#7632,#7633,#7634,#7635,#7636,#7637,#7638,#7639,#7640,#7641,#7642,#7643,
#7644,#7645,#7646,#7647,#7648,#7649,#7650,#7651,#7652,#7653,#7654,#7655,
#7656,#7657,#7658,#7659,#7660,#7661,#7662,#7663,#7664,#7665,#7666,#7667,
#7668,#7669,#7670,#7671,#7672,#7673,#7674,#7675,#7676,#7677,#7678,#7679,
#7680,#7681,#7682,#7683,#7684,#7685),(#7686,#7687,#7688,#7689,#7690,#7691,
#7692,#7693,#7694,#7695,#7696,#7697,#7698,#7699,#7700,#7701,#7702,#7703,
#7704,#7705,#7706,#7707,#7708,#7709,#7710,#7711,#7712,#7713,#7714,#7715,
#7716,#7717,#7718,#7719,#7720,#7721,#7722,#7723,#7724,#7725,#7726,#7727,
#7728,#7729,#7730,#7731,#7732,#7733,#7734,#7735,#7736,#7737,#7738,#7739,
#7740,#7741,#7742,#7743,#7744,#7745,#7746,#7747,#7748,#7749,#7750,#7751,
#7752,#7753,#7754,#7755,#7756,#7757,#7758,#7759,#7760,#7761,#7762,#7763,
#7764,#7765,#7766,#7767,#7768),(#7769,#7770,#7771,#7772,#7773,#7774,#7775,
#7776,#7777,#7778,#7779,#7780,#7781,#7782,#7783,#7784,#7785,#7786,#7787,
#7788,#7789,#7790,#7791,#7792,#7793,#7794,#7795,#7796,#7797,#7798,#7799,
#7800,#7801,#7802,#7803,#7804,#7805,#7806,#7807,#7808,#7809,#7810,#7811,
#7812,#7813,#7814,#7815,#7816,#7817,#7818,#7819,#7820,#7821,#7822,#7823,
#7824,#7825,#7826,#7827,#7828,#7829,#7830,#7831,#7832,#7833,#7834,#7835,
#7836,#7837,#7838,#7839,#7840,#7841,#7842,#7843,#7844,#7845,#7846,#7847,
#7848,#7849,#7850,#7851),(#7852,#7853,#7854,#7855,#7856,#7857,#7858,#7859,
#7860,#7861,#7862,#7863,#7864,#7865,#7866,#7867,#7868,#7869,#7870,#7871,
#7872,#7873,#7874,#7875,#7876,#7877,#7878,#7879,#7880,#7881,#7882,#7883,
#7884,#7885,#7886,#7887,#7888,#7889,#7890,#7891,#7892,#7893,#7894,#7895,
#7896,#7897,#7898,#7899,#7900,#7901,#7902,#7903,#7904,#7905,#7906,#7907,
#7908,#7909,#7910,#7911,#7912,#7913,#7914,#7915,#7916,#7917,#7918,#7919,
#7920,#7921,#7922,#7923,#7924,#7925,#7926,#7927,#7928,#7929,#7930,#7931,
#7932,#7933,#7934),(#7935,#7936,#7937,#7938,#7939,#7940,#7941,#7942,#7943,
#7944,#7945,#7946,#7947,#7948,#7949,#7950,#7951,#7952,#7953,#7954,#7955,
#7956,#7957,#7958,#7959,#7960,#7961,#7962,#7963,#7964,#7965,#7966,#7967,
#7968,#7969,#7970,#7971,#7972,#7973,#7974,#7975,#7976,#7977,#7978,#7979,
#7980,#7981,#7982,#7983,#7984,#7985,#7986,#7987,#7988,#7989,#7990,#7991,
#7992,#7993,#7994,#7995,#7996,#7997,#7998,#7999,#8000,#8001,#8002,#8003,
#8004,#8005,#8006,#8007,#8008,#8009,#8010,#8011,#8012,#8013,#8014,#8015,
#8016,#8017),(#8018,#8019,#8020,#8021,#8022,#8023,#8024,#8025,#8026,#8027,
#8028,#8029,#8030,#8031,#8032,#8033,#8034,#8035,#8036,#8037,#8038,#8039,
#8040,#8041,#8042,#8043,#8044,#8045,#8046,#8047,#8048,#8049,#8050,#8051,
#8052,#8053,#8054,#8055,#8056,#8057,#8058,#8059,#8060,#8061,#8062,#8063,
#8064,#8065,#8066,#8067,#8068,#8069,#8070,#8071,#8072,#8073,#8074,#8075,
#8076,#8077,#8078,#8079,#8080,#8081,#8082,#8083,#8084,#8085,#8086,#8087,
#8088,#8089,#8090,#8091,#8092,#8093,#8094,#8095,#8096,#8097,#8098,#8099,
#8100),(#8101,#8102,#8103,#8104,#8105,#8106,#8107,#8108,#8109,#8110,#8111,
#8112,#8113,#8114,#8115,#8116,#8117,#8118,#8119,#8120,#8121,#8122,#8123,
#8124,#8125,#8126,#8127,#8128,#8129,#8130,#8131,#8132,#8133,#8134,#8135,
#8136,#8137,#8138,#8139,#8140,#8141,#8142,#8143,#8144,#8145,#8146,#8147,
#8148,#8149,#8150,#8151,#8152,#8153,#8154,#8155,#8156,#8157,#8158,#8159,
#8160,#8161,#8162,#8163,#8164,#8165,#8166,#8167,#8168,#8169,#8170,#8171,
#8172,#8173,#8174,#8175,#8176,#8177,#8178,#8179,#8180,#8181,#8182,#8183)),
 .UNSPECIFIED.,.F.,.F.,.F.,(4,3,4),(4,1,1,1,1,1,1,1,1,1,1,1,1,1,1,1,1,1,
1,1,1,1,1,1,1,1,1,1,1,1,1,1,1,1,1,1,1,1,1,1,1,1,1,1,1,1,1,1,1,1,1,1,1,1,
1,1,1,1,1,1,1,1,1,1,1,1,1,1,1,1,1,1,1,1,1,1,1,1,1,1,4),(-3.14161191345667,
-2.31918842711196,-2.31096438484718),(37.4480614519116,37.9436823521751,
38.4393032524387,38.9349241527022,39.4305450529657,39.9261659532292,40.4217868534927,
40.9174077537563,41.4130286540198,41.9086495542833,42.4042704545468,42.8998913548104,
43.3955122550739,43.8911331553374,44.3867540556009,44.8823749558644,45.377995856128,
45.8736167563915,46.369237656655,46.8648585569185,47.3604794571821,47.8561003574456,
48.3517212577091,48.8473421579726,49.3429630582362,49.8385839584997,50.3342048587632,
50.8298257590267,51.3254466592902,51.8210675595538,52.3166884598173,52.8123093600808,
53.3079302603443,53.8035511606079,54.2991720608714,54.7947929611349,55.2904138613984,
55.7860347616619,56.2816556619255,56.777276562189,57.2728974624525,57.768518362716,
58.2641392629795,58.7597601632431,59.2553810635066,59.7510019637701,60.2466228640336,
60.7422437642972,61.2378646645607,61.7334855648242,62.2291064650877,62.7247273653512,
63.2203482656148,63.7159691658783,64.2115900661418,64.7072109664053,65.2028318666689,
65.6984527669324,66.1940736671959,66.6896945674594,67.1853154677229,67.6809363679865,
68.17655726825,68.6721781685135,69.167799068777,69.6634199690406,70.1590408693041,
70.6546617695676,71.1502826698311,71.6459035700946,72.1415244703582,72.6371453706217,
73.1327662708852,73.6283871711487,74.1240080714123,74.6196289716758,75.1152498719393,
75.6108707722028,76.1064916724663,76.6021125727299,77.0977334729934),
 .UNSPECIFIED.);
#140=B_SPLINE_SURFACE_WITH_KNOTS('',3,3,((#8394,#8395,#8396,#8397,#8398,
#8399,#8400,#8401,#8402,#8403,#8404,#8405,#8406,#8407,#8408,#8409,#8410,
#8411,#8412,#8413,#8414,#8415,#8416,#8417,#8418,#8419,#8420,#8421,#8422,
#8423,#8424,#8425,#8426,#8427,#8428,#8429,#8430,#8431,#8432,#8433,#8434,
#8435,#8436,#8437,#8438,#8439,#8440,#8441,#8442,#8443,#8444,#8445,#8446,
#8447,#8448,#8449,#8450,#8451,#8452,#8453,#8454,#8455,#8456,#8457,#8458,
#8459,#8460,#8461,#8462,#8463,#8464,#8465,#8466,#8467,#8468,#8469,#8470,
#8471,#8472,#8473,#8474,#8475,#8476),(#8477,#8478,#8479,#8480,#8481,#8482,
#8483,#8484,#8485,#8486,#8487,#8488,#8489,#8490,#8491,#8492,#8493,#8494,
#8495,#8496,#8497,#8498,#8499,#8500,#8501,#8502,#8503,#8504,#8505,#8506,
#8507,#8508,#8509,#8510,#8511,#8512,#8513,#8514,#8515,#8516,#8517,#8518,
#8519,#8520,#8521,#8522,#8523,#8524,#8525,#8526,#8527,#8528,#8529,#8530,
#8531,#8532,#8533,#8534,#8535,#8536,#8537,#8538,#8539,#8540,#8541,#8542,
#8543,#8544,#8545,#8546,#8547,#8548,#8549,#8550,#8551,#8552,#8553,#8554,
#8555,#8556,#8557,#8558,#8559),(#8560,#8561,#8562,#8563,#8564,#8565,#8566,
#8567,#8568,#8569,#8570,#8571,#8572,#8573,#8574,#8575,#8576,#8577,#8578,
#8579,#8580,#8581,#8582,#8583,#8584,#8585,#8586,#8587,#8588,#8589,#8590,
#8591,#8592,#8593,#8594,#8595,#8596,#8597,#8598,#8599,#8600,#8601,#8602,
#8603,#8604,#8605,#8606,#8607,#8608,#8609,#8610,#8611,#8612,#8613,#8614,
#8615,#8616,#8617,#8618,#8619,#8620,#8621,#8622,#8623,#8624,#8625,#8626,
#8627,#8628,#8629,#8630,#8631,#8632,#8633,#8634,#8635,#8636,#8637,#8638,
#8639,#8640,#8641,#8642),(#8643,#8644,#8645,#8646,#8647,#8648,#8649,#8650,
#8651,#8652,#8653,#8654,#8655,#8656,#8657,#8658,#8659,#8660,#8661,#8662,
#8663,#8664,#8665,#8666,#8667,#8668,#8669,#8670,#8671,#8672,#8673,#8674,
#8675,#8676,#8677,#8678,#8679,#8680,#8681,#8682,#8683,#8684,#8685,#8686,
#8687,#8688,#8689,#8690,#8691,#8692,#8693,#8694,#8695,#8696,#8697,#8698,
#8699,#8700,#8701,#8702,#8703,#8704,#8705,#8706,#8707,#8708,#8709,#8710,
#8711,#8712,#8713,#8714,#8715,#8716,#8717,#8718,#8719,#8720,#8721,#8722,
#8723,#8724,#8725),(#8726,#8727,#8728,#8729,#8730,#8731,#8732,#8733,#8734,
#8735,#8736,#8737,#8738,#8739,#8740,#8741,#8742,#8743,#8744,#8745,#8746,
#8747,#8748,#8749,#8750,#8751,#8752,#8753,#8754,#8755,#8756,#8757,#8758,
#8759,#8760,#8761,#8762,#8763,#8764,#8765,#8766,#8767,#8768,#8769,#8770,
#8771,#8772,#8773,#8774,#8775,#8776,#8777,#8778,#8779,#8780,#8781,#8782,
#8783,#8784,#8785,#8786,#8787,#8788,#8789,#8790,#8791,#8792,#8793,#8794,
#8795,#8796,#8797,#8798,#8799,#8800,#8801,#8802,#8803,#8804,#8805,#8806,
#8807,#8808),(#8809,#8810,#8811,#8812,#8813,#8814,#8815,#8816,#8817,#8818,
#8819,#8820,#8821,#8822,#8823,#8824,#8825,#8826,#8827,#8828,#8829,#8830,
#8831,#8832,#8833,#8834,#8835,#8836,#8837,#8838,#8839,#8840,#8841,#8842,
#8843,#8844,#8845,#8846,#8847,#8848,#8849,#8850,#8851,#8852,#8853,#8854,
#8855,#8856,#8857,#8858,#8859,#8860,#8861,#8862,#8863,#8864,#8865,#8866,
#8867,#8868,#8869,#8870,#8871,#8872,#8873,#8874,#8875,#8876,#8877,#8878,
#8879,#8880,#8881,#8882,#8883,#8884,#8885,#8886,#8887,#8888,#8889,#8890,
#8891),(#8892,#8893,#8894,#8895,#8896,#8897,#8898,#8899,#8900,#8901,#8902,
#8903,#8904,#8905,#8906,#8907,#8908,#8909,#8910,#8911,#8912,#8913,#8914,
#8915,#8916,#8917,#8918,#8919,#8920,#8921,#8922,#8923,#8924,#8925,#8926,
#8927,#8928,#8929,#8930,#8931,#8932,#8933,#8934,#8935,#8936,#8937,#8938,
#8939,#8940,#8941,#8942,#8943,#8944,#8945,#8946,#8947,#8948,#8949,#8950,
#8951,#8952,#8953,#8954,#8955,#8956,#8957,#8958,#8959,#8960,#8961,#8962,
#8963,#8964,#8965,#8966,#8967,#8968,#8969,#8970,#8971,#8972,#8973,#8974)),
 .UNSPECIFIED.,.F.,.F.,.F.,(4,3,4),(4,1,1,1,1,1,1,1,1,1,1,1,1,1,1,1,1,1,
1,1,1,1,1,1,1,1,1,1,1,1,1,1,1,1,1,1,1,1,1,1,1,1,1,1,1,1,1,1,1,1,1,1,1,1,
1,1,1,1,1,1,1,1,1,1,1,1,1,1,1,1,1,1,1,1,1,1,1,1,1,1,4),(-3.14160734212958,
-2.31918842711196,-2.31096438484718),(37.4480614519116,37.9436823521751,
38.4393032524387,38.9349241527022,39.4305450529657,39.9261659532292,40.4217868534927,
40.9174077537563,41.4130286540198,41.9086495542833,42.4042704545468,42.8998913548104,
43.3955122550739,43.8911331553374,44.3867540556009,44.8823749558644,45.377995856128,
45.8736167563915,46.369237656655,46.8648585569185,47.3604794571821,47.8561003574456,
48.3517212577091,48.8473421579726,49.3429630582362,49.8385839584997,50.3342048587632,
50.8298257590267,51.3254466592902,51.8210675595538,52.3166884598173,52.8123093600808,
53.3079302603443,53.8035511606079,54.2991720608714,54.7947929611349,55.2904138613984,
55.7860347616619,56.2816556619255,56.777276562189,57.2728974624525,57.768518362716,
58.2641392629795,58.7597601632431,59.2553810635066,59.7510019637701,60.2466228640336,
60.7422437642972,61.2378646645607,61.7334855648242,62.2291064650877,62.7247273653512,
63.2203482656148,63.7159691658783,64.2115900661418,64.7072109664053,65.2028318666689,
65.6984527669324,66.1940736671959,66.6896945674594,67.1853154677229,67.6809363679865,
68.17655726825,68.6721781685135,69.167799068777,69.6634199690406,70.1590408693041,
70.6546617695676,71.1502826698311,71.6459035700946,72.1415244703582,72.6371453706217,
73.1327662708852,73.6283871711487,74.1240080714123,74.6196289716758,75.1152498719393,
75.6108707722028,76.1064916724663,76.6021125727299,77.0977334729934),
 .UNSPECIFIED.);
#141=B_SPLINE_SURFACE_WITH_KNOTS('',3,3,((#9132,#9133,#9134,#9135,#9136,
#9137,#9138,#9139,#9140,#9141,#9142,#9143,#9144,#9145,#9146,#9147,#9148,
#9149,#9150,#9151,#9152,#9153,#9154,#9155,#9156,#9157,#9158,#9159,#9160,
#9161,#9162,#9163,#9164,#9165,#9166,#9167,#9168,#9169,#9170,#9171,#9172,
#9173,#9174,#9175,#9176,#9177,#9178,#9179,#9180,#9181,#9182,#9183,#9184,
#9185,#9186,#9187,#9188,#9189,#9190,#9191,#9192,#9193,#9194,#9195,#9196,
#9197,#9198,#9199,#9200,#9201,#9202,#9203,#9204,#9205,#9206,#9207,#9208,
#9209,#9210,#9211,#9212,#9213,#9214),(#9215,#9216,#9217,#9218,#9219,#9220,
#9221,#9222,#9223,#9224,#9225,#9226,#9227,#9228,#9229,#9230,#9231,#9232,
#9233,#9234,#9235,#9236,#9237,#9238,#9239,#9240,#9241,#9242,#9243,#9244,
#9245,#9246,#9247,#9248,#9249,#9250,#9251,#9252,#9253,#9254,#9255,#9256,
#9257,#9258,#9259,#9260,#9261,#9262,#9263,#9264,#9265,#9266,#9267,#9268,
#9269,#9270,#9271,#9272,#9273,#9274,#9275,#9276,#9277,#9278,#9279,#9280,
#9281,#9282,#9283,#9284,#9285,#9286,#9287,#9288,#9289,#9290,#9291,#9292,
#9293,#9294,#9295,#9296,#9297),(#9298,#9299,#9300,#9301,#9302,#9303,#9304,
#9305,#9306,#9307,#9308,#9309,#9310,#9311,#9312,#9313,#9314,#9315,#9316,
#9317,#9318,#9319,#9320,#9321,#9322,#9323,#9324,#9325,#9326,#9327,#9328,
#9329,#9330,#9331,#9332,#9333,#9334,#9335,#9336,#9337,#9338,#9339,#9340,
#9341,#9342,#9343,#9344,#9345,#9346,#9347,#9348,#9349,#9350,#9351,#9352,
#9353,#9354,#9355,#9356,#9357,#9358,#9359,#9360,#9361,#9362,#9363,#9364,
#9365,#9366,#9367,#9368,#9369,#9370,#9371,#9372,#9373,#9374,#9375,#9376,
#9377,#9378,#9379,#9380),(#9381,#9382,#9383,#9384,#9385,#9386,#9387,#9388,
#9389,#9390,#9391,#9392,#9393,#9394,#9395,#9396,#9397,#9398,#9399,#9400,
#9401,#9402,#9403,#9404,#9405,#9406,#9407,#9408,#9409,#9410,#9411,#9412,
#9413,#9414,#9415,#9416,#9417,#9418,#9419,#9420,#9421,#9422,#9423,#9424,
#9425,#9426,#9427,#9428,#9429,#9430,#9431,#9432,#9433,#9434,#9435,#9436,
#9437,#9438,#9439,#9440,#9441,#9442,#9443,#9444,#9445,#9446,#9447,#9448,
#9449,#9450,#9451,#9452,#9453,#9454,#9455,#9456,#9457,#9458,#9459,#9460,
#9461,#9462,#9463),(#9464,#9465,#9466,#9467,#9468,#9469,#9470,#9471,#9472,
#9473,#9474,#9475,#9476,#9477,#9478,#9479,#9480,#9481,#9482,#9483,#9484,
#9485,#9486,#9487,#9488,#9489,#9490,#9491,#9492,#9493,#9494,#9495,#9496,
#9497,#9498,#9499,#9500,#9501,#9502,#9503,#9504,#9505,#9506,#9507,#9508,
#9509,#9510,#9511,#9512,#9513,#9514,#9515,#9516,#9517,#9518,#9519,#9520,
#9521,#9522,#9523,#9524,#9525,#9526,#9527,#9528,#9529,#9530,#9531,#9532,
#9533,#9534,#9535,#9536,#9537,#9538,#9539,#9540,#9541,#9542,#9543,#9544,
#9545,#9546),(#9547,#9548,#9549,#9550,#9551,#9552,#9553,#9554,#9555,#9556,
#9557,#9558,#9559,#9560,#9561,#9562,#9563,#9564,#9565,#9566,#9567,#9568,
#9569,#9570,#9571,#9572,#9573,#9574,#9575,#9576,#9577,#9578,#9579,#9580,
#9581,#9582,#9583,#9584,#9585,#9586,#9587,#9588,#9589,#9590,#9591,#9592,
#9593,#9594,#9595,#9596,#9597,#9598,#9599,#9600,#9601,#9602,#9603,#9604,
#9605,#9606,#9607,#9608,#9609,#9610,#9611,#9612,#9613,#9614,#9615,#9616,
#9617,#9618,#9619,#9620,#9621,#9622,#9623,#9624,#9625,#9626,#9627,#9628,
#9629),(#9630,#9631,#9632,#9633,#9634,#9635,#9636,#9637,#9638,#9639,#9640,
#9641,#9642,#9643,#9644,#9645,#9646,#9647,#9648,#9649,#9650,#9651,#9652,
#9653,#9654,#9655,#9656,#9657,#9658,#9659,#9660,#9661,#9662,#9663,#9664,
#9665,#9666,#9667,#9668,#9669,#9670,#9671,#9672,#9673,#9674,#9675,#9676,
#9677,#9678,#9679,#9680,#9681,#9682,#9683,#9684,#9685,#9686,#9687,#9688,
#9689,#9690,#9691,#9692,#9693,#9694,#9695,#9696,#9697,#9698,#9699,#9700,
#9701,#9702,#9703,#9704,#9705,#9706,#9707,#9708,#9709,#9710,#9711,#9712)),
 .UNSPECIFIED.,.F.,.F.,.F.,(4,3,4),(4,1,1,1,1,1,1,1,1,1,1,1,1,1,1,1,1,1,
1,1,1,1,1,1,1,1,1,1,1,1,1,1,1,1,1,1,1,1,1,1,1,1,1,1,1,1,1,1,1,1,1,1,1,1,
1,1,1,1,1,1,1,1,1,1,1,1,1,1,1,1,1,1,1,1,1,1,1,1,1,1,4),(-3.14161466211375,
-2.31918842711196,-2.31096438484718),(37.4480614519116,37.9436823521751,
38.4393032524387,38.9349241527022,39.4305450529657,39.9261659532292,40.4217868534927,
40.9174077537563,41.4130286540198,41.9086495542833,42.4042704545468,42.8998913548104,
43.3955122550739,43.8911331553374,44.3867540556009,44.8823749558644,45.377995856128,
45.8736167563915,46.369237656655,46.8648585569185,47.3604794571821,47.8561003574456,
48.3517212577091,48.8473421579726,49.3429630582362,49.8385839584997,50.3342048587632,
50.8298257590267,51.3254466592902,51.8210675595538,52.3166884598173,52.8123093600808,
53.3079302603443,53.8035511606079,54.2991720608714,54.7947929611349,55.2904138613984,
55.7860347616619,56.2816556619255,56.777276562189,57.2728974624525,57.768518362716,
58.2641392629795,58.7597601632431,59.2553810635066,59.7510019637701,60.2466228640336,
60.7422437642972,61.2378646645607,61.7334855648242,62.2291064650877,62.7247273653512,
63.2203482656148,63.7159691658783,64.2115900661418,64.7072109664053,65.2028318666689,
65.6984527669324,66.1940736671959,66.6896945674594,67.1853154677229,67.6809363679865,
68.17655726825,68.6721781685135,69.167799068777,69.6634199690406,70.1590408693041,
70.6546617695676,71.1502826698311,71.6459035700946,72.1415244703582,72.6371453706217,
73.1327662708852,73.6283871711487,74.1240080714123,74.6196289716758,75.1152498719393,
75.6108707722028,76.1064916724663,76.6021125727299,77.0977334729934),
 .UNSPECIFIED.);
#142=B_SPLINE_SURFACE_WITH_KNOTS('',3,3,((#9727,#9728,#9729,#9730,#9731,
#9732,#9733,#9734,#9735,#9736,#9737,#9738,#9739,#9740,#9741,#9742,#9743,
#9744,#9745,#9746,#9747,#9748,#9749,#9750,#9751,#9752,#9753,#9754,#9755,
#9756,#9757,#9758,#9759,#9760,#9761,#9762,#9763,#9764,#9765,#9766,#9767,
#9768,#9769,#9770,#9771,#9772,#9773,#9774,#9775,#9776,#9777,#9778,#9779,
#9780,#9781,#9782,#9783,#9784,#9785,#9786,#9787,#9788,#9789,#9790,#9791,
#9792,#9793,#9794,#9795,#9796,#9797,#9798,#9799,#9800,#9801,#9802,#9803,
#9804,#9805,#9806,#9807,#9808,#9809),(#9810,#9811,#9812,#9813,#9814,#9815,
#9816,#9817,#9818,#9819,#9820,#9821,#9822,#9823,#9824,#9825,#9826,#9827,
#9828,#9829,#9830,#9831,#9832,#9833,#9834,#9835,#9836,#9837,#9838,#9839,
#9840,#9841,#9842,#9843,#9844,#9845,#9846,#9847,#9848,#9849,#9850,#9851,
#9852,#9853,#9854,#9855,#9856,#9857,#9858,#9859,#9860,#9861,#9862,#9863,
#9864,#9865,#9866,#9867,#9868,#9869,#9870,#9871,#9872,#9873,#9874,#9875,
#9876,#9877,#9878,#9879,#9880,#9881,#9882,#9883,#9884,#9885,#9886,#9887,
#9888,#9889,#9890,#9891,#9892),(#9893,#9894,#9895,#9896,#9897,#9898,#9899,
#9900,#9901,#9902,#9903,#9904,#9905,#9906,#9907,#9908,#9909,#9910,#9911,
#9912,#9913,#9914,#9915,#9916,#9917,#9918,#9919,#9920,#9921,#9922,#9923,
#9924,#9925,#9926,#9927,#9928,#9929,#9930,#9931,#9932,#9933,#9934,#9935,
#9936,#9937,#9938,#9939,#9940,#9941,#9942,#9943,#9944,#9945,#9946,#9947,
#9948,#9949,#9950,#9951,#9952,#9953,#9954,#9955,#9956,#9957,#9958,#9959,
#9960,#9961,#9962,#9963,#9964,#9965,#9966,#9967,#9968,#9969,#9970,#9971,
#9972,#9973,#9974,#9975),(#9976,#9977,#9978,#9979,#9980,#9981,#9982,#9983,
#9984,#9985,#9986,#9987,#9988,#9989,#9990,#9991,#9992,#9993,#9994,#9995,
#9996,#9997,#9998,#9999,#10000,#10001,#10002,#10003,#10004,#10005,#10006,
#10007,#10008,#10009,#10010,#10011,#10012,#10013,#10014,#10015,#10016,#10017,
#10018,#10019,#10020,#10021,#10022,#10023,#10024,#10025,#10026,#10027,#10028,
#10029,#10030,#10031,#10032,#10033,#10034,#10035,#10036,#10037,#10038,#10039,
#10040,#10041,#10042,#10043,#10044,#10045,#10046,#10047,#10048,#10049,#10050,
#10051,#10052,#10053,#10054,#10055,#10056,#10057,#10058),(#10059,#10060,
#10061,#10062,#10063,#10064,#10065,#10066,#10067,#10068,#10069,#10070,#10071,
#10072,#10073,#10074,#10075,#10076,#10077,#10078,#10079,#10080,#10081,#10082,
#10083,#10084,#10085,#10086,#10087,#10088,#10089,#10090,#10091,#10092,#10093,
#10094,#10095,#10096,#10097,#10098,#10099,#10100,#10101,#10102,#10103,#10104,
#10105,#10106,#10107,#10108,#10109,#10110,#10111,#10112,#10113,#10114,#10115,
#10116,#10117,#10118,#10119,#10120,#10121,#10122,#10123,#10124,#10125,#10126,
#10127,#10128,#10129,#10130,#10131,#10132,#10133,#10134,#10135,#10136,#10137,
#10138,#10139,#10140,#10141),(#10142,#10143,#10144,#10145,#10146,#10147,
#10148,#10149,#10150,#10151,#10152,#10153,#10154,#10155,#10156,#10157,#10158,
#10159,#10160,#10161,#10162,#10163,#10164,#10165,#10166,#10167,#10168,#10169,
#10170,#10171,#10172,#10173,#10174,#10175,#10176,#10177,#10178,#10179,#10180,
#10181,#10182,#10183,#10184,#10185,#10186,#10187,#10188,#10189,#10190,#10191,
#10192,#10193,#10194,#10195,#10196,#10197,#10198,#10199,#10200,#10201,#10202,
#10203,#10204,#10205,#10206,#10207,#10208,#10209,#10210,#10211,#10212,#10213,
#10214,#10215,#10216,#10217,#10218,#10219,#10220,#10221,#10222,#10223,#10224),
(#10225,#10226,#10227,#10228,#10229,#10230,#10231,#10232,#10233,#10234,
#10235,#10236,#10237,#10238,#10239,#10240,#10241,#10242,#10243,#10244,#10245,
#10246,#10247,#10248,#10249,#10250,#10251,#10252,#10253,#10254,#10255,#10256,
#10257,#10258,#10259,#10260,#10261,#10262,#10263,#10264,#10265,#10266,#10267,
#10268,#10269,#10270,#10271,#10272,#10273,#10274,#10275,#10276,#10277,#10278,
#10279,#10280,#10281,#10282,#10283,#10284,#10285,#10286,#10287,#10288,#10289,
#10290,#10291,#10292,#10293,#10294,#10295,#10296,#10297,#10298,#10299,#10300,
#10301,#10302,#10303,#10304,#10305,#10306,#10307)),.UNSPECIFIED.,.F.,.F.,
 .F.,(4,3,4),(4,1,1,1,1,1,1,1,1,1,1,1,1,1,1,1,1,1,1,1,1,1,1,1,1,1,1,1,1,
1,1,1,1,1,1,1,1,1,1,1,1,1,1,1,1,1,1,1,1,1,1,1,1,1,1,1,1,1,1,1,1,1,1,1,1,
1,1,1,1,1,1,1,1,1,1,1,1,1,1,1,4),(-3.1416141437338,-2.31918842711196,-2.31096438484718),
(37.4480614519116,37.9436823521751,38.4393032524387,38.9349241527022,39.4305450529657,
39.9261659532292,40.4217868534927,40.9174077537563,41.4130286540198,41.9086495542833,
42.4042704545468,42.8998913548104,43.3955122550739,43.8911331553374,44.3867540556009,
44.8823749558644,45.377995856128,45.8736167563915,46.369237656655,46.8648585569185,
47.3604794571821,47.8561003574456,48.3517212577091,48.8473421579726,49.3429630582362,
49.8385839584997,50.3342048587632,50.8298257590267,51.3254466592902,51.8210675595538,
52.3166884598173,52.8123093600808,53.3079302603443,53.8035511606079,54.2991720608714,
54.7947929611349,55.2904138613984,55.7860347616619,56.2816556619255,56.777276562189,
57.2728974624525,57.768518362716,58.2641392629795,58.7597601632431,59.2553810635066,
59.7510019637701,60.2466228640336,60.7422437642972,61.2378646645607,61.7334855648242,
62.2291064650877,62.7247273653512,63.2203482656148,63.7159691658783,64.2115900661418,
64.7072109664053,65.2028318666689,65.6984527669324,66.1940736671959,66.6896945674594,
67.1853154677229,67.6809363679865,68.17655726825,68.6721781685135,69.167799068777,
69.6634199690406,70.1590408693041,70.6546617695676,71.1502826698311,71.6459035700946,
72.1415244703582,72.6371453706217,73.1327662708852,73.6283871711487,74.1240080714123,
74.6196289716758,75.1152498719393,75.6108707722028,76.1064916724663,76.6021125727299,
77.0977334729934),.UNSPECIFIED.);
#143=B_SPLINE_SURFACE_WITH_KNOTS('',3,3,((#10390,#10391,#10392,#10393,#10394,
#10395,#10396,#10397,#10398,#10399,#10400,#10401,#10402,#10403,#10404,#10405,
#10406,#10407,#10408,#10409,#10410,#10411,#10412,#10413,#10414,#10415,#10416,
#10417,#10418,#10419,#10420,#10421,#10422,#10423,#10424,#10425,#10426,#10427,
#10428,#10429,#10430,#10431,#10432,#10433,#10434,#10435,#10436,#10437,#10438,
#10439,#10440,#10441,#10442,#10443,#10444,#10445,#10446,#10447,#10448,#10449,
#10450,#10451,#10452,#10453,#10454,#10455,#10456,#10457,#10458,#10459,#10460,
#10461,#10462,#10463,#10464,#10465,#10466,#10467,#10468,#10469,#10470,#10471,
#10472),(#10473,#10474,#10475,#10476,#10477,#10478,#10479,#10480,#10481,
#10482,#10483,#10484,#10485,#10486,#10487,#10488,#10489,#10490,#10491,#10492,
#10493,#10494,#10495,#10496,#10497,#10498,#10499,#10500,#10501,#10502,#10503,
#10504,#10505,#10506,#10507,#10508,#10509,#10510,#10511,#10512,#10513,#10514,
#10515,#10516,#10517,#10518,#10519,#10520,#10521,#10522,#10523,#10524,#10525,
#10526,#10527,#10528,#10529,#10530,#10531,#10532,#10533,#10534,#10535,#10536,
#10537,#10538,#10539,#10540,#10541,#10542,#10543,#10544,#10545,#10546,#10547,
#10548,#10549,#10550,#10551,#10552,#10553,#10554,#10555),(#10556,#10557,
#10558,#10559,#10560,#10561,#10562,#10563,#10564,#10565,#10566,#10567,#10568,
#10569,#10570,#10571,#10572,#10573,#10574,#10575,#10576,#10577,#10578,#10579,
#10580,#10581,#10582,#10583,#10584,#10585,#10586,#10587,#10588,#10589,#10590,
#10591,#10592,#10593,#10594,#10595,#10596,#10597,#10598,#10599,#10600,#10601,
#10602,#10603,#10604,#10605,#10606,#10607,#10608,#10609,#10610,#10611,#10612,
#10613,#10614,#10615,#10616,#10617,#10618,#10619,#10620,#10621,#10622,#10623,
#10624,#10625,#10626,#10627,#10628,#10629,#10630,#10631,#10632,#10633,#10634,
#10635,#10636,#10637,#10638),(#10639,#10640,#10641,#10642,#10643,#10644,
#10645,#10646,#10647,#10648,#10649,#10650,#10651,#10652,#10653,#10654,#10655,
#10656,#10657,#10658,#10659,#10660,#10661,#10662,#10663,#10664,#10665,#10666,
#10667,#10668,#10669,#10670,#10671,#10672,#10673,#10674,#10675,#10676,#10677,
#10678,#10679,#10680,#10681,#10682,#10683,#10684,#10685,#10686,#10687,#10688,
#10689,#10690,#10691,#10692,#10693,#10694,#10695,#10696,#10697,#10698,#10699,
#10700,#10701,#10702,#10703,#10704,#10705,#10706,#10707,#10708,#10709,#10710,
#10711,#10712,#10713,#10714,#10715,#10716,#10717,#10718,#10719,#10720,#10721),
(#10722,#10723,#10724,#10725,#10726,#10727,#10728,#10729,#10730,#10731,
#10732,#10733,#10734,#10735,#10736,#10737,#10738,#10739,#10740,#10741,#10742,
#10743,#10744,#10745,#10746,#10747,#10748,#10749,#10750,#10751,#10752,#10753,
#10754,#10755,#10756,#10757,#10758,#10759,#10760,#10761,#10762,#10763,#10764,
#10765,#10766,#10767,#10768,#10769,#10770,#10771,#10772,#10773,#10774,#10775,
#10776,#10777,#10778,#10779,#10780,#10781,#10782,#10783,#10784,#10785,#10786,
#10787,#10788,#10789,#10790,#10791,#10792,#10793,#10794,#10795,#10796,#10797,
#10798,#10799,#10800,#10801,#10802,#10803,#10804),(#10805,#10806,#10807,
#10808,#10809,#10810,#10811,#10812,#10813,#10814,#10815,#10816,#10817,#10818,
#10819,#10820,#10821,#10822,#10823,#10824,#10825,#10826,#10827,#10828,#10829,
#10830,#10831,#10832,#10833,#10834,#10835,#10836,#10837,#10838,#10839,#10840,
#10841,#10842,#10843,#10844,#10845,#10846,#10847,#10848,#10849,#10850,#10851,
#10852,#10853,#10854,#10855,#10856,#10857,#10858,#10859,#10860,#10861,#10862,
#10863,#10864,#10865,#10866,#10867,#10868,#10869,#10870,#10871,#10872,#10873,
#10874,#10875,#10876,#10877,#10878,#10879,#10880,#10881,#10882,#10883,#10884,
#10885,#10886,#10887),(#10888,#10889,#10890,#10891,#10892,#10893,#10894,
#10895,#10896,#10897,#10898,#10899,#10900,#10901,#10902,#10903,#10904,#10905,
#10906,#10907,#10908,#10909,#10910,#10911,#10912,#10913,#10914,#10915,#10916,
#10917,#10918,#10919,#10920,#10921,#10922,#10923,#10924,#10925,#10926,#10927,
#10928,#10929,#10930,#10931,#10932,#10933,#10934,#10935,#10936,#10937,#10938,
#10939,#10940,#10941,#10942,#10943,#10944,#10945,#10946,#10947,#10948,#10949,
#10950,#10951,#10952,#10953,#10954,#10955,#10956,#10957,#10958,#10959,#10960,
#10961,#10962,#10963,#10964,#10965,#10966,#10967,#10968,#10969,#10970)),
 .UNSPECIFIED.,.F.,.F.,.F.,(4,3,4),(4,1,1,1,1,1,1,1,1,1,1,1,1,1,1,1,1,1,
1,1,1,1,1,1,1,1,1,1,1,1,1,1,1,1,1,1,1,1,1,1,1,1,1,1,1,1,1,1,1,1,1,1,1,1,
1,1,1,1,1,1,1,1,1,1,1,1,1,1,1,1,1,1,1,1,1,1,1,1,1,1,4),(-3.14160445015778,
-2.31918842711196,-2.31096438484718),(37.4480614519116,37.9436823521751,
38.4393032524387,38.9349241527022,39.4305450529657,39.9261659532292,40.4217868534927,
40.9174077537563,41.4130286540198,41.9086495542833,42.4042704545468,42.8998913548104,
43.3955122550739,43.8911331553374,44.3867540556009,44.8823749558644,45.377995856128,
45.8736167563915,46.369237656655,46.8648585569185,47.3604794571821,47.8561003574456,
48.3517212577091,48.8473421579726,49.3429630582362,49.8385839584997,50.3342048587632,
50.8298257590267,51.3254466592902,51.8210675595538,52.3166884598173,52.8123093600808,
53.3079302603443,53.8035511606079,54.2991720608714,54.7947929611349,55.2904138613984,
55.7860347616619,56.2816556619255,56.777276562189,57.2728974624525,57.768518362716,
58.2641392629795,58.7597601632431,59.2553810635066,59.7510019637701,60.2466228640336,
60.7422437642972,61.2378646645607,61.7334855648242,62.2291064650877,62.7247273653512,
63.2203482656148,63.7159691658783,64.2115900661418,64.7072109664053,65.2028318666689,
65.6984527669324,66.1940736671959,66.6896945674594,67.1853154677229,67.6809363679865,
68.17655726825,68.6721781685135,69.167799068777,69.6634199690406,70.1590408693041,
70.6546617695676,71.1502826698311,71.6459035700946,72.1415244703582,72.6371453706217,
73.1327662708852,73.6283871711487,74.1240080714123,74.6196289716758,75.1152498719393,
75.6108707722028,76.1064916724663,76.6021125727299,77.0977334729934),
 .UNSPECIFIED.);
#144=B_SPLINE_SURFACE_WITH_KNOTS('',3,3,((#11280,#11281,#11282,#11283,#11284,
#11285,#11286,#11287,#11288,#11289,#11290,#11291,#11292,#11293,#11294,#11295,
#11296,#11297,#11298,#11299,#11300,#11301,#11302,#11303,#11304,#11305,#11306,
#11307,#11308,#11309,#11310,#11311,#11312,#11313,#11314,#11315,#11316,#11317,
#11318,#11319,#11320,#11321,#11322,#11323,#11324,#11325,#11326,#11327,#11328,
#11329,#11330,#11331,#11332,#11333,#11334,#11335,#11336,#11337,#11338,#11339,
#11340,#11341,#11342,#11343,#11344,#11345,#11346,#11347,#11348,#11349,#11350,
#11351,#11352,#11353,#11354,#11355,#11356,#11357,#11358,#11359,#11360,#11361,
#11362),(#11363,#11364,#11365,#11366,#11367,#11368,#11369,#11370,#11371,
#11372,#11373,#11374,#11375,#11376,#11377,#11378,#11379,#11380,#11381,#11382,
#11383,#11384,#11385,#11386,#11387,#11388,#11389,#11390,#11391,#11392,#11393,
#11394,#11395,#11396,#11397,#11398,#11399,#11400,#11401,#11402,#11403,#11404,
#11405,#11406,#11407,#11408,#11409,#11410,#11411,#11412,#11413,#11414,#11415,
#11416,#11417,#11418,#11419,#11420,#11421,#11422,#11423,#11424,#11425,#11426,
#11427,#11428,#11429,#11430,#11431,#11432,#11433,#11434,#11435,#11436,#11437,
#11438,#11439,#11440,#11441,#11442,#11443,#11444,#11445),(#11446,#11447,
#11448,#11449,#11450,#11451,#11452,#11453,#11454,#11455,#11456,#11457,#11458,
#11459,#11460,#11461,#11462,#11463,#11464,#11465,#11466,#11467,#11468,#11469,
#11470,#11471,#11472,#11473,#11474,#11475,#11476,#11477,#11478,#11479,#11480,
#11481,#11482,#11483,#11484,#11485,#11486,#11487,#11488,#11489,#11490,#11491,
#11492,#11493,#11494,#11495,#11496,#11497,#11498,#11499,#11500,#11501,#11502,
#11503,#11504,#11505,#11506,#11507,#11508,#11509,#11510,#11511,#11512,#11513,
#11514,#11515,#11516,#11517,#11518,#11519,#11520,#11521,#11522,#11523,#11524,
#11525,#11526,#11527,#11528),(#11529,#11530,#11531,#11532,#11533,#11534,
#11535,#11536,#11537,#11538,#11539,#11540,#11541,#11542,#11543,#11544,#11545,
#11546,#11547,#11548,#11549,#11550,#11551,#11552,#11553,#11554,#11555,#11556,
#11557,#11558,#11559,#11560,#11561,#11562,#11563,#11564,#11565,#11566,#11567,
#11568,#11569,#11570,#11571,#11572,#11573,#11574,#11575,#11576,#11577,#11578,
#11579,#11580,#11581,#11582,#11583,#11584,#11585,#11586,#11587,#11588,#11589,
#11590,#11591,#11592,#11593,#11594,#11595,#11596,#11597,#11598,#11599,#11600,
#11601,#11602,#11603,#11604,#11605,#11606,#11607,#11608,#11609,#11610,#11611),
(#11612,#11613,#11614,#11615,#11616,#11617,#11618,#11619,#11620,#11621,
#11622,#11623,#11624,#11625,#11626,#11627,#11628,#11629,#11630,#11631,#11632,
#11633,#11634,#11635,#11636,#11637,#11638,#11639,#11640,#11641,#11642,#11643,
#11644,#11645,#11646,#11647,#11648,#11649,#11650,#11651,#11652,#11653,#11654,
#11655,#11656,#11657,#11658,#11659,#11660,#11661,#11662,#11663,#11664,#11665,
#11666,#11667,#11668,#11669,#11670,#11671,#11672,#11673,#11674,#11675,#11676,
#11677,#11678,#11679,#11680,#11681,#11682,#11683,#11684,#11685,#11686,#11687,
#11688,#11689,#11690,#11691,#11692,#11693,#11694),(#11695,#11696,#11697,
#11698,#11699,#11700,#11701,#11702,#11703,#11704,#11705,#11706,#11707,#11708,
#11709,#11710,#11711,#11712,#11713,#11714,#11715,#11716,#11717,#11718,#11719,
#11720,#11721,#11722,#11723,#11724,#11725,#11726,#11727,#11728,#11729,#11730,
#11731,#11732,#11733,#11734,#11735,#11736,#11737,#11738,#11739,#11740,#11741,
#11742,#11743,#11744,#11745,#11746,#11747,#11748,#11749,#11750,#11751,#11752,
#11753,#11754,#11755,#11756,#11757,#11758,#11759,#11760,#11761,#11762,#11763,
#11764,#11765,#11766,#11767,#11768,#11769,#11770,#11771,#11772,#11773,#11774,
#11775,#11776,#11777),(#11778,#11779,#11780,#11781,#11782,#11783,#11784,
#11785,#11786,#11787,#11788,#11789,#11790,#11791,#11792,#11793,#11794,#11795,
#11796,#11797,#11798,#11799,#11800,#11801,#11802,#11803,#11804,#11805,#11806,
#11807,#11808,#11809,#11810,#11811,#11812,#11813,#11814,#11815,#11816,#11817,
#11818,#11819,#11820,#11821,#11822,#11823,#11824,#11825,#11826,#11827,#11828,
#11829,#11830,#11831,#11832,#11833,#11834,#11835,#11836,#11837,#11838,#11839,
#11840,#11841,#11842,#11843,#11844,#11845,#11846,#11847,#11848,#11849,#11850,
#11851,#11852,#11853,#11854,#11855,#11856,#11857,#11858,#11859,#11860)),
 .UNSPECIFIED.,.F.,.F.,.F.,(4,3,4),(4,1,1,1,1,1,1,1,1,1,1,1,1,1,1,1,1,1,
1,1,1,1,1,1,1,1,1,1,1,1,1,1,1,1,1,1,1,1,1,1,1,1,1,1,1,1,1,1,1,1,1,1,1,1,
1,1,1,1,1,1,1,1,1,1,1,1,1,1,1,1,1,1,1,1,1,1,1,1,1,1,4),(-3.141607498859,
-2.31918842711196,-2.31096438484718),(37.4480614519116,37.9436823521751,
38.4393032524387,38.9349241527022,39.4305450529657,39.9261659532292,40.4217868534927,
40.9174077537563,41.4130286540198,41.9086495542833,42.4042704545468,42.8998913548104,
43.3955122550739,43.8911331553374,44.3867540556009,44.8823749558644,45.377995856128,
45.8736167563915,46.369237656655,46.8648585569185,47.3604794571821,47.8561003574456,
48.3517212577091,48.8473421579726,49.3429630582362,49.8385839584997,50.3342048587632,
50.8298257590267,51.3254466592902,51.8210675595538,52.3166884598173,52.8123093600808,
53.3079302603443,53.8035511606079,54.2991720608714,54.7947929611349,55.2904138613984,
55.7860347616619,56.2816556619255,56.777276562189,57.2728974624525,57.768518362716,
58.2641392629795,58.7597601632431,59.2553810635066,59.7510019637701,60.2466228640336,
60.7422437642972,61.2378646645607,61.7334855648242,62.2291064650877,62.7247273653512,
63.2203482656148,63.7159691658783,64.2115900661418,64.7072109664053,65.2028318666689,
65.6984527669324,66.1940736671959,66.6896945674594,67.1853154677229,67.6809363679865,
68.17655726825,68.6721781685135,69.167799068777,69.6634199690406,70.1590408693041,
70.6546617695676,71.1502826698311,71.6459035700946,72.1415244703582,72.6371453706217,
73.1327662708852,73.6283871711487,74.1240080714123,74.6196289716758,75.1152498719393,
75.6108707722028,76.1064916724663,76.6021125727299,77.0977334729934),
 .UNSPECIFIED.);
#145=B_SPLINE_SURFACE_WITH_KNOTS('',3,3,((#12173,#12174,#12175,#12176,#12177,
#12178,#12179,#12180,#12181,#12182,#12183,#12184,#12185,#12186,#12187,#12188,
#12189,#12190,#12191,#12192,#12193,#12194,#12195,#12196,#12197,#12198,#12199,
#12200,#12201,#12202,#12203,#12204,#12205,#12206,#12207,#12208,#12209,#12210,
#12211,#12212,#12213,#12214,#12215,#12216,#12217,#12218,#12219,#12220,#12221,
#12222,#12223,#12224,#12225,#12226,#12227,#12228,#12229,#12230,#12231,#12232,
#12233,#12234,#12235,#12236,#12237,#12238,#12239,#12240,#12241,#12242,#12243,
#12244,#12245,#12246,#12247,#12248,#12249,#12250,#12251,#12252,#12253,#12254,
#12255),(#12256,#12257,#12258,#12259,#12260,#12261,#12262,#12263,#12264,
#12265,#12266,#12267,#12268,#12269,#12270,#12271,#12272,#12273,#12274,#12275,
#12276,#12277,#12278,#12279,#12280,#12281,#12282,#12283,#12284,#12285,#12286,
#12287,#12288,#12289,#12290,#12291,#12292,#12293,#12294,#12295,#12296,#12297,
#12298,#12299,#12300,#12301,#12302,#12303,#12304,#12305,#12306,#12307,#12308,
#12309,#12310,#12311,#12312,#12313,#12314,#12315,#12316,#12317,#12318,#12319,
#12320,#12321,#12322,#12323,#12324,#12325,#12326,#12327,#12328,#12329,#12330,
#12331,#12332,#12333,#12334,#12335,#12336,#12337,#12338),(#12339,#12340,
#12341,#12342,#12343,#12344,#12345,#12346,#12347,#12348,#12349,#12350,#12351,
#12352,#12353,#12354,#12355,#12356,#12357,#12358,#12359,#12360,#12361,#12362,
#12363,#12364,#12365,#12366,#12367,#12368,#12369,#12370,#12371,#12372,#12373,
#12374,#12375,#12376,#12377,#12378,#12379,#12380,#12381,#12382,#12383,#12384,
#12385,#12386,#12387,#12388,#12389,#12390,#12391,#12392,#12393,#12394,#12395,
#12396,#12397,#12398,#12399,#12400,#12401,#12402,#12403,#12404,#12405,#12406,
#12407,#12408,#12409,#12410,#12411,#12412,#12413,#12414,#12415,#12416,#12417,
#12418,#12419,#12420,#12421),(#12422,#12423,#12424,#12425,#12426,#12427,
#12428,#12429,#12430,#12431,#12432,#12433,#12434,#12435,#12436,#12437,#12438,
#12439,#12440,#12441,#12442,#12443,#12444,#12445,#12446,#12447,#12448,#12449,
#12450,#12451,#12452,#12453,#12454,#12455,#12456,#12457,#12458,#12459,#12460,
#12461,#12462,#12463,#12464,#12465,#12466,#12467,#12468,#12469,#12470,#12471,
#12472,#12473,#12474,#12475,#12476,#12477,#12478,#12479,#12480,#12481,#12482,
#12483,#12484,#12485,#12486,#12487,#12488,#12489,#12490,#12491,#12492,#12493,
#12494,#12495,#12496,#12497,#12498,#12499,#12500,#12501,#12502,#12503,#12504),
(#12505,#12506,#12507,#12508,#12509,#12510,#12511,#12512,#12513,#12514,
#12515,#12516,#12517,#12518,#12519,#12520,#12521,#12522,#12523,#12524,#12525,
#12526,#12527,#12528,#12529,#12530,#12531,#12532,#12533,#12534,#12535,#12536,
#12537,#12538,#12539,#12540,#12541,#12542,#12543,#12544,#12545,#12546,#12547,
#12548,#12549,#12550,#12551,#12552,#12553,#12554,#12555,#12556,#12557,#12558,
#12559,#12560,#12561,#12562,#12563,#12564,#12565,#12566,#12567,#12568,#12569,
#12570,#12571,#12572,#12573,#12574,#12575,#12576,#12577,#12578,#12579,#12580,
#12581,#12582,#12583,#12584,#12585,#12586,#12587),(#12588,#12589,#12590,
#12591,#12592,#12593,#12594,#12595,#12596,#12597,#12598,#12599,#12600,#12601,
#12602,#12603,#12604,#12605,#12606,#12607,#12608,#12609,#12610,#12611,#12612,
#12613,#12614,#12615,#12616,#12617,#12618,#12619,#12620,#12621,#12622,#12623,
#12624,#12625,#12626,#12627,#12628,#12629,#12630,#12631,#12632,#12633,#12634,
#12635,#12636,#12637,#12638,#12639,#12640,#12641,#12642,#12643,#12644,#12645,
#12646,#12647,#12648,#12649,#12650,#12651,#12652,#12653,#12654,#12655,#12656,
#12657,#12658,#12659,#12660,#12661,#12662,#12663,#12664,#12665,#12666,#12667,
#12668,#12669,#12670),(#12671,#12672,#12673,#12674,#12675,#12676,#12677,
#12678,#12679,#12680,#12681,#12682,#12683,#12684,#12685,#12686,#12687,#12688,
#12689,#12690,#12691,#12692,#12693,#12694,#12695,#12696,#12697,#12698,#12699,
#12700,#12701,#12702,#12703,#12704,#12705,#12706,#12707,#12708,#12709,#12710,
#12711,#12712,#12713,#12714,#12715,#12716,#12717,#12718,#12719,#12720,#12721,
#12722,#12723,#12724,#12725,#12726,#12727,#12728,#12729,#12730,#12731,#12732,
#12733,#12734,#12735,#12736,#12737,#12738,#12739,#12740,#12741,#12742,#12743,
#12744,#12745,#12746,#12747,#12748,#12749,#12750,#12751,#12752,#12753)),
 .UNSPECIFIED.,.F.,.F.,.F.,(4,3,4),(4,1,1,1,1,1,1,1,1,1,1,1,1,1,1,1,1,1,
1,1,1,1,1,1,1,1,1,1,1,1,1,1,1,1,1,1,1,1,1,1,1,1,1,1,1,1,1,1,1,1,1,1,1,1,
1,1,1,1,1,1,1,1,1,1,1,1,1,1,1,1,1,1,1,1,1,1,1,1,1,1,4),(-3.14161191345667,
-2.31918842711196,-2.31096438484718),(37.4480614519116,37.9436823521751,
38.4393032524387,38.9349241527022,39.4305450529657,39.9261659532292,40.4217868534927,
40.9174077537563,41.4130286540198,41.9086495542833,42.4042704545468,42.8998913548104,
43.3955122550739,43.8911331553374,44.3867540556009,44.8823749558644,45.377995856128,
45.8736167563915,46.369237656655,46.8648585569185,47.3604794571821,47.8561003574456,
48.3517212577091,48.8473421579726,49.3429630582362,49.8385839584997,50.3342048587632,
50.8298257590267,51.3254466592902,51.8210675595538,52.3166884598173,52.8123093600808,
53.3079302603443,53.8035511606079,54.2991720608714,54.7947929611349,55.2904138613984,
55.7860347616619,56.2816556619255,56.777276562189,57.2728974624525,57.768518362716,
58.2641392629795,58.7597601632431,59.2553810635066,59.7510019637701,60.2466228640336,
60.7422437642972,61.2378646645607,61.7334855648242,62.2291064650877,62.7247273653512,
63.2203482656148,63.7159691658783,64.2115900661418,64.7072109664053,65.2028318666689,
65.6984527669324,66.1940736671959,66.6896945674594,67.1853154677229,67.6809363679865,
68.17655726825,68.6721781685135,69.167799068777,69.6634199690406,70.1590408693041,
70.6546617695676,71.1502826698311,71.6459035700946,72.1415244703582,72.6371453706217,
73.1327662708852,73.6283871711487,74.1240080714123,74.6196289716758,75.1152498719393,
75.6108707722028,76.1064916724663,76.6021125727299,77.0977334729934),
 .UNSPECIFIED.);
#146=B_SPLINE_SURFACE_WITH_KNOTS('',3,3,((#12848,#12849,#12850,#12851,#12852,
#12853,#12854,#12855,#12856,#12857,#12858,#12859,#12860,#12861,#12862,#12863,
#12864,#12865,#12866,#12867,#12868,#12869,#12870,#12871,#12872,#12873,#12874,
#12875,#12876,#12877,#12878,#12879,#12880,#12881,#12882,#12883,#12884,#12885,
#12886,#12887,#12888,#12889,#12890,#12891,#12892,#12893,#12894,#12895,#12896,
#12897,#12898,#12899,#12900,#12901,#12902,#12903,#12904,#12905,#12906,#12907,
#12908,#12909,#12910,#12911,#12912,#12913,#12914,#12915,#12916,#12917,#12918,
#12919,#12920,#12921,#12922,#12923,#12924,#12925,#12926,#12927,#12928,#12929,
#12930),(#12931,#12932,#12933,#12934,#12935,#12936,#12937,#12938,#12939,
#12940,#12941,#12942,#12943,#12944,#12945,#12946,#12947,#12948,#12949,#12950,
#12951,#12952,#12953,#12954,#12955,#12956,#12957,#12958,#12959,#12960,#12961,
#12962,#12963,#12964,#12965,#12966,#12967,#12968,#12969,#12970,#12971,#12972,
#12973,#12974,#12975,#12976,#12977,#12978,#12979,#12980,#12981,#12982,#12983,
#12984,#12985,#12986,#12987,#12988,#12989,#12990,#12991,#12992,#12993,#12994,
#12995,#12996,#12997,#12998,#12999,#13000,#13001,#13002,#13003,#13004,#13005,
#13006,#13007,#13008,#13009,#13010,#13011,#13012,#13013),(#13014,#13015,
#13016,#13017,#13018,#13019,#13020,#13021,#13022,#13023,#13024,#13025,#13026,
#13027,#13028,#13029,#13030,#13031,#13032,#13033,#13034,#13035,#13036,#13037,
#13038,#13039,#13040,#13041,#13042,#13043,#13044,#13045,#13046,#13047,#13048,
#13049,#13050,#13051,#13052,#13053,#13054,#13055,#13056,#13057,#13058,#13059,
#13060,#13061,#13062,#13063,#13064,#13065,#13066,#13067,#13068,#13069,#13070,
#13071,#13072,#13073,#13074,#13075,#13076,#13077,#13078,#13079,#13080,#13081,
#13082,#13083,#13084,#13085,#13086,#13087,#13088,#13089,#13090,#13091,#13092,
#13093,#13094,#13095,#13096),(#13097,#13098,#13099,#13100,#13101,#13102,
#13103,#13104,#13105,#13106,#13107,#13108,#13109,#13110,#13111,#13112,#13113,
#13114,#13115,#13116,#13117,#13118,#13119,#13120,#13121,#13122,#13123,#13124,
#13125,#13126,#13127,#13128,#13129,#13130,#13131,#13132,#13133,#13134,#13135,
#13136,#13137,#13138,#13139,#13140,#13141,#13142,#13143,#13144,#13145,#13146,
#13147,#13148,#13149,#13150,#13151,#13152,#13153,#13154,#13155,#13156,#13157,
#13158,#13159,#13160,#13161,#13162,#13163,#13164,#13165,#13166,#13167,#13168,
#13169,#13170,#13171,#13172,#13173,#13174,#13175,#13176,#13177,#13178,#13179),
(#13180,#13181,#13182,#13183,#13184,#13185,#13186,#13187,#13188,#13189,
#13190,#13191,#13192,#13193,#13194,#13195,#13196,#13197,#13198,#13199,#13200,
#13201,#13202,#13203,#13204,#13205,#13206,#13207,#13208,#13209,#13210,#13211,
#13212,#13213,#13214,#13215,#13216,#13217,#13218,#13219,#13220,#13221,#13222,
#13223,#13224,#13225,#13226,#13227,#13228,#13229,#13230,#13231,#13232,#13233,
#13234,#13235,#13236,#13237,#13238,#13239,#13240,#13241,#13242,#13243,#13244,
#13245,#13246,#13247,#13248,#13249,#13250,#13251,#13252,#13253,#13254,#13255,
#13256,#13257,#13258,#13259,#13260,#13261,#13262),(#13263,#13264,#13265,
#13266,#13267,#13268,#13269,#13270,#13271,#13272,#13273,#13274,#13275,#13276,
#13277,#13278,#13279,#13280,#13281,#13282,#13283,#13284,#13285,#13286,#13287,
#13288,#13289,#13290,#13291,#13292,#13293,#13294,#13295,#13296,#13297,#13298,
#13299,#13300,#13301,#13302,#13303,#13304,#13305,#13306,#13307,#13308,#13309,
#13310,#13311,#13312,#13313,#13314,#13315,#13316,#13317,#13318,#13319,#13320,
#13321,#13322,#13323,#13324,#13325,#13326,#13327,#13328,#13329,#13330,#13331,
#13332,#13333,#13334,#13335,#13336,#13337,#13338,#13339,#13340,#13341,#13342,
#13343,#13344,#13345),(#13346,#13347,#13348,#13349,#13350,#13351,#13352,
#13353,#13354,#13355,#13356,#13357,#13358,#13359,#13360,#13361,#13362,#13363,
#13364,#13365,#13366,#13367,#13368,#13369,#13370,#13371,#13372,#13373,#13374,
#13375,#13376,#13377,#13378,#13379,#13380,#13381,#13382,#13383,#13384,#13385,
#13386,#13387,#13388,#13389,#13390,#13391,#13392,#13393,#13394,#13395,#13396,
#13397,#13398,#13399,#13400,#13401,#13402,#13403,#13404,#13405,#13406,#13407,
#13408,#13409,#13410,#13411,#13412,#13413,#13414,#13415,#13416,#13417,#13418,
#13419,#13420,#13421,#13422,#13423,#13424,#13425,#13426,#13427,#13428)),
 .UNSPECIFIED.,.F.,.F.,.F.,(4,3,4),(4,1,1,1,1,1,1,1,1,1,1,1,1,1,1,1,1,1,
1,1,1,1,1,1,1,1,1,1,1,1,1,1,1,1,1,1,1,1,1,1,1,1,1,1,1,1,1,1,1,1,1,1,1,1,
1,1,1,1,1,1,1,1,1,1,1,1,1,1,1,1,1,1,1,1,1,1,1,1,1,1,4),(-3.14161466211375,
-2.31918842711196,-2.31096438484718),(37.4480614519116,37.9436823521751,
38.4393032524387,38.9349241527022,39.4305450529657,39.9261659532292,40.4217868534927,
40.9174077537563,41.4130286540198,41.9086495542833,42.4042704545468,42.8998913548104,
43.3955122550739,43.8911331553374,44.3867540556009,44.8823749558644,45.377995856128,
45.8736167563915,46.369237656655,46.8648585569185,47.3604794571821,47.8561003574456,
48.3517212577091,48.8473421579726,49.3429630582362,49.8385839584997,50.3342048587632,
50.8298257590267,51.3254466592902,51.8210675595538,52.3166884598173,52.8123093600808,
53.3079302603443,53.8035511606079,54.2991720608714,54.7947929611349,55.2904138613984,
55.7860347616619,56.2816556619255,56.777276562189,57.2728974624525,57.768518362716,
58.2641392629795,58.7597601632431,59.2553810635066,59.7510019637701,60.2466228640336,
60.7422437642972,61.2378646645607,61.7334855648242,62.2291064650877,62.7247273653512,
63.2203482656148,63.7159691658783,64.2115900661418,64.7072109664053,65.2028318666689,
65.6984527669324,66.1940736671959,66.6896945674594,67.1853154677229,67.6809363679865,
68.17655726825,68.6721781685135,69.167799068777,69.6634199690406,70.1590408693041,
70.6546617695676,71.1502826698311,71.6459035700946,72.1415244703582,72.6371453706217,
73.1327662708852,73.6283871711487,74.1240080714123,74.6196289716758,75.1152498719393,
75.6108707722028,76.1064916724663,76.6021125727299,77.0977334729934),
 .UNSPECIFIED.);
#147=B_SPLINE_SURFACE_WITH_KNOTS('',3,3,((#13534,#13535,#13536,#13537,#13538,
#13539,#13540,#13541,#13542,#13543,#13544,#13545,#13546,#13547,#13548,#13549,
#13550,#13551,#13552,#13553,#13554,#13555,#13556,#13557,#13558,#13559,#13560,
#13561,#13562,#13563,#13564,#13565,#13566,#13567,#13568,#13569,#13570,#13571,
#13572,#13573,#13574,#13575,#13576,#13577,#13578,#13579,#13580,#13581,#13582,
#13583,#13584,#13585,#13586,#13587,#13588,#13589,#13590,#13591,#13592,#13593,
#13594,#13595,#13596,#13597,#13598,#13599,#13600,#13601,#13602,#13603,#13604,
#13605,#13606,#13607,#13608,#13609,#13610,#13611,#13612,#13613,#13614,#13615,
#13616),(#13617,#13618,#13619,#13620,#13621,#13622,#13623,#13624,#13625,
#13626,#13627,#13628,#13629,#13630,#13631,#13632,#13633,#13634,#13635,#13636,
#13637,#13638,#13639,#13640,#13641,#13642,#13643,#13644,#13645,#13646,#13647,
#13648,#13649,#13650,#13651,#13652,#13653,#13654,#13655,#13656,#13657,#13658,
#13659,#13660,#13661,#13662,#13663,#13664,#13665,#13666,#13667,#13668,#13669,
#13670,#13671,#13672,#13673,#13674,#13675,#13676,#13677,#13678,#13679,#13680,
#13681,#13682,#13683,#13684,#13685,#13686,#13687,#13688,#13689,#13690,#13691,
#13692,#13693,#13694,#13695,#13696,#13697,#13698,#13699),(#13700,#13701,
#13702,#13703,#13704,#13705,#13706,#13707,#13708,#13709,#13710,#13711,#13712,
#13713,#13714,#13715,#13716,#13717,#13718,#13719,#13720,#13721,#13722,#13723,
#13724,#13725,#13726,#13727,#13728,#13729,#13730,#13731,#13732,#13733,#13734,
#13735,#13736,#13737,#13738,#13739,#13740,#13741,#13742,#13743,#13744,#13745,
#13746,#13747,#13748,#13749,#13750,#13751,#13752,#13753,#13754,#13755,#13756,
#13757,#13758,#13759,#13760,#13761,#13762,#13763,#13764,#13765,#13766,#13767,
#13768,#13769,#13770,#13771,#13772,#13773,#13774,#13775,#13776,#13777,#13778,
#13779,#13780,#13781,#13782),(#13783,#13784,#13785,#13786,#13787,#13788,
#13789,#13790,#13791,#13792,#13793,#13794,#13795,#13796,#13797,#13798,#13799,
#13800,#13801,#13802,#13803,#13804,#13805,#13806,#13807,#13808,#13809,#13810,
#13811,#13812,#13813,#13814,#13815,#13816,#13817,#13818,#13819,#13820,#13821,
#13822,#13823,#13824,#13825,#13826,#13827,#13828,#13829,#13830,#13831,#13832,
#13833,#13834,#13835,#13836,#13837,#13838,#13839,#13840,#13841,#13842,#13843,
#13844,#13845,#13846,#13847,#13848,#13849,#13850,#13851,#13852,#13853,#13854,
#13855,#13856,#13857,#13858,#13859,#13860,#13861,#13862,#13863,#13864,#13865),
(#13866,#13867,#13868,#13869,#13870,#13871,#13872,#13873,#13874,#13875,
#13876,#13877,#13878,#13879,#13880,#13881,#13882,#13883,#13884,#13885,#13886,
#13887,#13888,#13889,#13890,#13891,#13892,#13893,#13894,#13895,#13896,#13897,
#13898,#13899,#13900,#13901,#13902,#13903,#13904,#13905,#13906,#13907,#13908,
#13909,#13910,#13911,#13912,#13913,#13914,#13915,#13916,#13917,#13918,#13919,
#13920,#13921,#13922,#13923,#13924,#13925,#13926,#13927,#13928,#13929,#13930,
#13931,#13932,#13933,#13934,#13935,#13936,#13937,#13938,#13939,#13940,#13941,
#13942,#13943,#13944,#13945,#13946,#13947,#13948),(#13949,#13950,#13951,
#13952,#13953,#13954,#13955,#13956,#13957,#13958,#13959,#13960,#13961,#13962,
#13963,#13964,#13965,#13966,#13967,#13968,#13969,#13970,#13971,#13972,#13973,
#13974,#13975,#13976,#13977,#13978,#13979,#13980,#13981,#13982,#13983,#13984,
#13985,#13986,#13987,#13988,#13989,#13990,#13991,#13992,#13993,#13994,#13995,
#13996,#13997,#13998,#13999,#14000,#14001,#14002,#14003,#14004,#14005,#14006,
#14007,#14008,#14009,#14010,#14011,#14012,#14013,#14014,#14015,#14016,#14017,
#14018,#14019,#14020,#14021,#14022,#14023,#14024,#14025,#14026,#14027,#14028,
#14029,#14030,#14031),(#14032,#14033,#14034,#14035,#14036,#14037,#14038,
#14039,#14040,#14041,#14042,#14043,#14044,#14045,#14046,#14047,#14048,#14049,
#14050,#14051,#14052,#14053,#14054,#14055,#14056,#14057,#14058,#14059,#14060,
#14061,#14062,#14063,#14064,#14065,#14066,#14067,#14068,#14069,#14070,#14071,
#14072,#14073,#14074,#14075,#14076,#14077,#14078,#14079,#14080,#14081,#14082,
#14083,#14084,#14085,#14086,#14087,#14088,#14089,#14090,#14091,#14092,#14093,
#14094,#14095,#14096,#14097,#14098,#14099,#14100,#14101,#14102,#14103,#14104,
#14105,#14106,#14107,#14108,#14109,#14110,#14111,#14112,#14113,#14114)),
 .UNSPECIFIED.,.F.,.F.,.F.,(4,3,4),(4,1,1,1,1,1,1,1,1,1,1,1,1,1,1,1,1,1,
1,1,1,1,1,1,1,1,1,1,1,1,1,1,1,1,1,1,1,1,1,1,1,1,1,1,1,1,1,1,1,1,1,1,1,1,
1,1,1,1,1,1,1,1,1,1,1,1,1,1,1,1,1,1,1,1,1,1,1,1,1,1,4),(-3.14162181373948,
-2.31918842711196,-2.31096438484718),(37.4480614519116,37.9436823521751,
38.4393032524387,38.9349241527022,39.4305450529657,39.9261659532292,40.4217868534927,
40.9174077537563,41.4130286540198,41.9086495542833,42.4042704545468,42.8998913548104,
43.3955122550739,43.8911331553374,44.3867540556009,44.8823749558644,45.377995856128,
45.8736167563915,46.369237656655,46.8648585569185,47.3604794571821,47.8561003574456,
48.3517212577091,48.8473421579726,49.3429630582362,49.8385839584997,50.3342048587632,
50.8298257590267,51.3254466592902,51.8210675595538,52.3166884598173,52.8123093600808,
53.3079302603443,53.8035511606079,54.2991720608714,54.7947929611349,55.2904138613984,
55.7860347616619,56.2816556619255,56.777276562189,57.2728974624525,57.768518362716,
58.2641392629795,58.7597601632431,59.2553810635066,59.7510019637701,60.2466228640336,
60.7422437642972,61.2378646645607,61.7334855648242,62.2291064650877,62.7247273653512,
63.2203482656148,63.7159691658783,64.2115900661418,64.7072109664053,65.2028318666689,
65.6984527669324,66.1940736671959,66.6896945674594,67.1853154677229,67.6809363679865,
68.17655726825,68.6721781685135,69.167799068777,69.6634199690406,70.1590408693041,
70.6546617695676,71.1502826698311,71.6459035700946,72.1415244703582,72.6371453706217,
73.1327662708852,73.6283871711487,74.1240080714123,74.6196289716758,75.1152498719393,
75.6108707722028,76.1064916724663,76.6021125727299,77.0977334729934),
 .UNSPECIFIED.);
#148=B_SPLINE_SURFACE_WITH_KNOTS('',3,3,((#14393,#14394,#14395,#14396,#14397,
#14398,#14399,#14400,#14401,#14402,#14403,#14404,#14405,#14406,#14407,#14408,
#14409,#14410,#14411,#14412,#14413,#14414,#14415,#14416,#14417,#14418,#14419,
#14420,#14421,#14422,#14423,#14424,#14425,#14426,#14427,#14428,#14429,#14430,
#14431,#14432,#14433,#14434,#14435,#14436,#14437,#14438,#14439,#14440,#14441,
#14442,#14443,#14444,#14445,#14446,#14447,#14448,#14449,#14450,#14451,#14452,
#14453,#14454,#14455,#14456,#14457,#14458,#14459,#14460,#14461,#14462,#14463,
#14464,#14465,#14466,#14467,#14468,#14469,#14470,#14471,#14472,#14473,#14474,
#14475,#14476,#14477,#14478,#14479),(#14480,#14481,#14482,#14483,#14484,
#14485,#14486,#14487,#14488,#14489,#14490,#14491,#14492,#14493,#14494,#14495,
#14496,#14497,#14498,#14499,#14500,#14501,#14502,#14503,#14504,#14505,#14506,
#14507,#14508,#14509,#14510,#14511,#14512,#14513,#14514,#14515,#14516,#14517,
#14518,#14519,#14520,#14521,#14522,#14523,#14524,#14525,#14526,#14527,#14528,
#14529,#14530,#14531,#14532,#14533,#14534,#14535,#14536,#14537,#14538,#14539,
#14540,#14541,#14542,#14543,#14544,#14545,#14546,#14547,#14548,#14549,#14550,
#14551,#14552,#14553,#14554,#14555,#14556,#14557,#14558,#14559,#14560,#14561,
#14562,#14563,#14564,#14565,#14566),(#14567,#14568,#14569,#14570,#14571,
#14572,#14573,#14574,#14575,#14576,#14577,#14578,#14579,#14580,#14581,#14582,
#14583,#14584,#14585,#14586,#14587,#14588,#14589,#14590,#14591,#14592,#14593,
#14594,#14595,#14596,#14597,#14598,#14599,#14600,#14601,#14602,#14603,#14604,
#14605,#14606,#14607,#14608,#14609,#14610,#14611,#14612,#14613,#14614,#14615,
#14616,#14617,#14618,#14619,#14620,#14621,#14622,#14623,#14624,#14625,#14626,
#14627,#14628,#14629,#14630,#14631,#14632,#14633,#14634,#14635,#14636,#14637,
#14638,#14639,#14640,#14641,#14642,#14643,#14644,#14645,#14646,#14647,#14648,
#14649,#14650,#14651,#14652,#14653),(#14654,#14655,#14656,#14657,#14658,
#14659,#14660,#14661,#14662,#14663,#14664,#14665,#14666,#14667,#14668,#14669,
#14670,#14671,#14672,#14673,#14674,#14675,#14676,#14677,#14678,#14679,#14680,
#14681,#14682,#14683,#14684,#14685,#14686,#14687,#14688,#14689,#14690,#14691,
#14692,#14693,#14694,#14695,#14696,#14697,#14698,#14699,#14700,#14701,#14702,
#14703,#14704,#14705,#14706,#14707,#14708,#14709,#14710,#14711,#14712,#14713,
#14714,#14715,#14716,#14717,#14718,#14719,#14720,#14721,#14722,#14723,#14724,
#14725,#14726,#14727,#14728,#14729,#14730,#14731,#14732,#14733,#14734,#14735,
#14736,#14737,#14738,#14739,#14740),(#14741,#14742,#14743,#14744,#14745,
#14746,#14747,#14748,#14749,#14750,#14751,#14752,#14753,#14754,#14755,#14756,
#14757,#14758,#14759,#14760,#14761,#14762,#14763,#14764,#14765,#14766,#14767,
#14768,#14769,#14770,#14771,#14772,#14773,#14774,#14775,#14776,#14777,#14778,
#14779,#14780,#14781,#14782,#14783,#14784,#14785,#14786,#14787,#14788,#14789,
#14790,#14791,#14792,#14793,#14794,#14795,#14796,#14797,#14798,#14799,#14800,
#14801,#14802,#14803,#14804,#14805,#14806,#14807,#14808,#14809,#14810,#14811,
#14812,#14813,#14814,#14815,#14816,#14817,#14818,#14819,#14820,#14821,#14822,
#14823,#14824,#14825,#14826,#14827),(#14828,#14829,#14830,#14831,#14832,
#14833,#14834,#14835,#14836,#14837,#14838,#14839,#14840,#14841,#14842,#14843,
#14844,#14845,#14846,#14847,#14848,#14849,#14850,#14851,#14852,#14853,#14854,
#14855,#14856,#14857,#14858,#14859,#14860,#14861,#14862,#14863,#14864,#14865,
#14866,#14867,#14868,#14869,#14870,#14871,#14872,#14873,#14874,#14875,#14876,
#14877,#14878,#14879,#14880,#14881,#14882,#14883,#14884,#14885,#14886,#14887,
#14888,#14889,#14890,#14891,#14892,#14893,#14894,#14895,#14896,#14897,#14898,
#14899,#14900,#14901,#14902,#14903,#14904,#14905,#14906,#14907,#14908,#14909,
#14910,#14911,#14912,#14913,#14914),(#14915,#14916,#14917,#14918,#14919,
#14920,#14921,#14922,#14923,#14924,#14925,#14926,#14927,#14928,#14929,#14930,
#14931,#14932,#14933,#14934,#14935,#14936,#14937,#14938,#14939,#14940,#14941,
#14942,#14943,#14944,#14945,#14946,#14947,#14948,#14949,#14950,#14951,#14952,
#14953,#14954,#14955,#14956,#14957,#14958,#14959,#14960,#14961,#14962,#14963,
#14964,#14965,#14966,#14967,#14968,#14969,#14970,#14971,#14972,#14973,#14974,
#14975,#14976,#14977,#14978,#14979,#14980,#14981,#14982,#14983,#14984,#14985,
#14986,#14987,#14988,#14989,#14990,#14991,#14992,#14993,#14994,#14995,#14996,
#14997,#14998,#14999,#15000,#15001),(#15002,#15003,#15004,#15005,#15006,
#15007,#15008,#15009,#15010,#15011,#15012,#15013,#15014,#15015,#15016,#15017,
#15018,#15019,#15020,#15021,#15022,#15023,#15024,#15025,#15026,#15027,#15028,
#15029,#15030,#15031,#15032,#15033,#15034,#15035,#15036,#15037,#15038,#15039,
#15040,#15041,#15042,#15043,#15044,#15045,#15046,#15047,#15048,#15049,#15050,
#15051,#15052,#15053,#15054,#15055,#15056,#15057,#15058,#15059,#15060,#15061,
#15062,#15063,#15064,#15065,#15066,#15067,#15068,#15069,#15070,#15071,#15072,
#15073,#15074,#15075,#15076,#15077,#15078,#15079,#15080,#15081,#15082,#15083,
#15084,#15085,#15086,#15087,#15088),(#15089,#15090,#15091,#15092,#15093,
#15094,#15095,#15096,#15097,#15098,#15099,#15100,#15101,#15102,#15103,#15104,
#15105,#15106,#15107,#15108,#15109,#15110,#15111,#15112,#15113,#15114,#15115,
#15116,#15117,#15118,#15119,#15120,#15121,#15122,#15123,#15124,#15125,#15126,
#15127,#15128,#15129,#15130,#15131,#15132,#15133,#15134,#15135,#15136,#15137,
#15138,#15139,#15140,#15141,#15142,#15143,#15144,#15145,#15146,#15147,#15148,
#15149,#15150,#15151,#15152,#15153,#15154,#15155,#15156,#15157,#15158,#15159,
#15160,#15161,#15162,#15163,#15164,#15165,#15166,#15167,#15168,#15169,#15170,
#15171,#15172,#15173,#15174,#15175),(#15176,#15177,#15178,#15179,#15180,
#15181,#15182,#15183,#15184,#15185,#15186,#15187,#15188,#15189,#15190,#15191,
#15192,#15193,#15194,#15195,#15196,#15197,#15198,#15199,#15200,#15201,#15202,
#15203,#15204,#15205,#15206,#15207,#15208,#15209,#15210,#15211,#15212,#15213,
#15214,#15215,#15216,#15217,#15218,#15219,#15220,#15221,#15222,#15223,#15224,
#15225,#15226,#15227,#15228,#15229,#15230,#15231,#15232,#15233,#15234,#15235,
#15236,#15237,#15238,#15239,#15240,#15241,#15242,#15243,#15244,#15245,#15246,
#15247,#15248,#15249,#15250,#15251,#15252,#15253,#15254,#15255,#15256,#15257,
#15258,#15259,#15260,#15261,#15262),(#15263,#15264,#15265,#15266,#15267,
#15268,#15269,#15270,#15271,#15272,#15273,#15274,#15275,#15276,#15277,#15278,
#15279,#15280,#15281,#15282,#15283,#15284,#15285,#15286,#15287,#15288,#15289,
#15290,#15291,#15292,#15293,#15294,#15295,#15296,#15297,#15298,#15299,#15300,
#15301,#15302,#15303,#15304,#15305,#15306,#15307,#15308,#15309,#15310,#15311,
#15312,#15313,#15314,#15315,#15316,#15317,#15318,#15319,#15320,#15321,#15322,
#15323,#15324,#15325,#15326,#15327,#15328,#15329,#15330,#15331,#15332,#15333,
#15334,#15335,#15336,#15337,#15338,#15339,#15340,#15341,#15342,#15343,#15344,
#15345,#15346,#15347,#15348,#15349),(#15350,#15351,#15352,#15353,#15354,
#15355,#15356,#15357,#15358,#15359,#15360,#15361,#15362,#15363,#15364,#15365,
#15366,#15367,#15368,#15369,#15370,#15371,#15372,#15373,#15374,#15375,#15376,
#15377,#15378,#15379,#15380,#15381,#15382,#15383,#15384,#15385,#15386,#15387,
#15388,#15389,#15390,#15391,#15392,#15393,#15394,#15395,#15396,#15397,#15398,
#15399,#15400,#15401,#15402,#15403,#15404,#15405,#15406,#15407,#15408,#15409,
#15410,#15411,#15412,#15413,#15414,#15415,#15416,#15417,#15418,#15419,#15420,
#15421,#15422,#15423,#15424,#15425,#15426,#15427,#15428,#15429,#15430,#15431,
#15432,#15433,#15434,#15435,#15436)),.UNSPECIFIED.,.F.,.F.,.F.,(4,3,1,1,
3,4),(4,1,1,1,1,1,1,1,1,1,1,1,1,1,1,1,1,1,1,1,1,1,1,1,1,1,1,1,1,1,1,1,1,
1,1,1,1,1,1,1,1,1,1,1,1,1,1,1,1,1,1,1,1,1,1,1,1,1,1,1,1,1,1,1,1,1,1,1,1,
1,1,1,1,1,1,1,1,1,1,1,1,1,1,1,4),(-0.855237294951358,-0.838467936226788,
-0.119781133745207,0.359343401242513,0.838467936230234,0.85540498854205),
(32.7241439763348,33.2152755694897,33.7064071626446,34.1975387557996,34.6886703489545,
35.1798019421094,35.6709335352643,36.1620651284192,36.6531967215741,37.1443283147291,
37.635459907884,38.1265915010389,38.6177230941938,39.1088546873487,39.5999862805036,
40.0911178736586,40.5822494668135,41.0733810599684,41.5645126531233,42.0556442462782,
42.5467758394332,43.0379074325881,43.529039025743,44.0201706188979,44.5113022120528,
45.0024338052078,45.4935653983627,45.9846969915176,46.4758285846725,46.9669601778274,
47.4580917709823,47.9492233641373,48.4403549572922,48.9314865504471,49.422618143602,
49.9137497367569,50.4048813299118,50.8960129230668,51.3871445162217,51.8782761093766,
52.3694077025315,52.8605392956864,53.3516708888414,53.8428024819963,54.3339340751512,
54.8250656683061,55.316197261461,55.8073288546159,56.2984604477709,56.7895920409258,
57.2807236340807,57.7718552272356,58.2629868203905,58.7541184135455,59.2452500067004,
59.7363815998553,60.2275131930102,60.7186447861651,61.20977637932,61.700907972475,
62.1920395656299,62.6831711587848,63.1743027519397,63.6654343450946,64.1565659382495,
64.6476975314045,65.1388291245594,65.6299607177143,66.1210923108692,66.6122239040241,
67.1033554971791,67.594487090334,68.0856186834889,68.5767502766438,69.0678818697987,
69.5590134629536,70.0501450561086,70.5412766492635,71.0324082424184,71.5235398355733,
72.0146714287282,72.5058030218832,72.9969346150381,73.488066208193,73.9791978013479),
 .UNSPECIFIED.);
#149=B_SPLINE_SURFACE_WITH_KNOTS('',3,3,((#15693,#15694,#15695,#15696,#15697,
#15698,#15699,#15700,#15701,#15702,#15703,#15704,#15705,#15706,#15707,#15708,
#15709,#15710,#15711,#15712,#15713,#15714,#15715,#15716,#15717,#15718,#15719,
#15720,#15721,#15722,#15723,#15724,#15725,#15726,#15727,#15728,#15729,#15730,
#15731,#15732,#15733,#15734,#15735,#15736,#15737,#15738,#15739,#15740,#15741,
#15742,#15743,#15744,#15745,#15746,#15747,#15748,#15749,#15750,#15751,#15752,
#15753,#15754,#15755,#15756,#15757,#15758,#15759,#15760,#15761,#15762,#15763,
#15764,#15765,#15766,#15767,#15768,#15769,#15770,#15771,#15772,#15773,#15774,
#15775,#15776,#15777,#15778,#15779),(#15780,#15781,#15782,#15783,#15784,
#15785,#15786,#15787,#15788,#15789,#15790,#15791,#15792,#15793,#15794,#15795,
#15796,#15797,#15798,#15799,#15800,#15801,#15802,#15803,#15804,#15805,#15806,
#15807,#15808,#15809,#15810,#15811,#15812,#15813,#15814,#15815,#15816,#15817,
#15818,#15819,#15820,#15821,#15822,#15823,#15824,#15825,#15826,#15827,#15828,
#15829,#15830,#15831,#15832,#15833,#15834,#15835,#15836,#15837,#15838,#15839,
#15840,#15841,#15842,#15843,#15844,#15845,#15846,#15847,#15848,#15849,#15850,
#15851,#15852,#15853,#15854,#15855,#15856,#15857,#15858,#15859,#15860,#15861,
#15862,#15863,#15864,#15865,#15866),(#15867,#15868,#15869,#15870,#15871,
#15872,#15873,#15874,#15875,#15876,#15877,#15878,#15879,#15880,#15881,#15882,
#15883,#15884,#15885,#15886,#15887,#15888,#15889,#15890,#15891,#15892,#15893,
#15894,#15895,#15896,#15897,#15898,#15899,#15900,#15901,#15902,#15903,#15904,
#15905,#15906,#15907,#15908,#15909,#15910,#15911,#15912,#15913,#15914,#15915,
#15916,#15917,#15918,#15919,#15920,#15921,#15922,#15923,#15924,#15925,#15926,
#15927,#15928,#15929,#15930,#15931,#15932,#15933,#15934,#15935,#15936,#15937,
#15938,#15939,#15940,#15941,#15942,#15943,#15944,#15945,#15946,#15947,#15948,
#15949,#15950,#15951,#15952,#15953),(#15954,#15955,#15956,#15957,#15958,
#15959,#15960,#15961,#15962,#15963,#15964,#15965,#15966,#15967,#15968,#15969,
#15970,#15971,#15972,#15973,#15974,#15975,#15976,#15977,#15978,#15979,#15980,
#15981,#15982,#15983,#15984,#15985,#15986,#15987,#15988,#15989,#15990,#15991,
#15992,#15993,#15994,#15995,#15996,#15997,#15998,#15999,#16000,#16001,#16002,
#16003,#16004,#16005,#16006,#16007,#16008,#16009,#16010,#16011,#16012,#16013,
#16014,#16015,#16016,#16017,#16018,#16019,#16020,#16021,#16022,#16023,#16024,
#16025,#16026,#16027,#16028,#16029,#16030,#16031,#16032,#16033,#16034,#16035,
#16036,#16037,#16038,#16039,#16040),(#16041,#16042,#16043,#16044,#16045,
#16046,#16047,#16048,#16049,#16050,#16051,#16052,#16053,#16054,#16055,#16056,
#16057,#16058,#16059,#16060,#16061,#16062,#16063,#16064,#16065,#16066,#16067,
#16068,#16069,#16070,#16071,#16072,#16073,#16074,#16075,#16076,#16077,#16078,
#16079,#16080,#16081,#16082,#16083,#16084,#16085,#16086,#16087,#16088,#16089,
#16090,#16091,#16092,#16093,#16094,#16095,#16096,#16097,#16098,#16099,#16100,
#16101,#16102,#16103,#16104,#16105,#16106,#16107,#16108,#16109,#16110,#16111,
#16112,#16113,#16114,#16115,#16116,#16117,#16118,#16119,#16120,#16121,#16122,
#16123,#16124,#16125,#16126,#16127),(#16128,#16129,#16130,#16131,#16132,
#16133,#16134,#16135,#16136,#16137,#16138,#16139,#16140,#16141,#16142,#16143,
#16144,#16145,#16146,#16147,#16148,#16149,#16150,#16151,#16152,#16153,#16154,
#16155,#16156,#16157,#16158,#16159,#16160,#16161,#16162,#16163,#16164,#16165,
#16166,#16167,#16168,#16169,#16170,#16171,#16172,#16173,#16174,#16175,#16176,
#16177,#16178,#16179,#16180,#16181,#16182,#16183,#16184,#16185,#16186,#16187,
#16188,#16189,#16190,#16191,#16192,#16193,#16194,#16195,#16196,#16197,#16198,
#16199,#16200,#16201,#16202,#16203,#16204,#16205,#16206,#16207,#16208,#16209,
#16210,#16211,#16212,#16213,#16214),(#16215,#16216,#16217,#16218,#16219,
#16220,#16221,#16222,#16223,#16224,#16225,#16226,#16227,#16228,#16229,#16230,
#16231,#16232,#16233,#16234,#16235,#16236,#16237,#16238,#16239,#16240,#16241,
#16242,#16243,#16244,#16245,#16246,#16247,#16248,#16249,#16250,#16251,#16252,
#16253,#16254,#16255,#16256,#16257,#16258,#16259,#16260,#16261,#16262,#16263,
#16264,#16265,#16266,#16267,#16268,#16269,#16270,#16271,#16272,#16273,#16274,
#16275,#16276,#16277,#16278,#16279,#16280,#16281,#16282,#16283,#16284,#16285,
#16286,#16287,#16288,#16289,#16290,#16291,#16292,#16293,#16294,#16295,#16296,
#16297,#16298,#16299,#16300,#16301),(#16302,#16303,#16304,#16305,#16306,
#16307,#16308,#16309,#16310,#16311,#16312,#16313,#16314,#16315,#16316,#16317,
#16318,#16319,#16320,#16321,#16322,#16323,#16324,#16325,#16326,#16327,#16328,
#16329,#16330,#16331,#16332,#16333,#16334,#16335,#16336,#16337,#16338,#16339,
#16340,#16341,#16342,#16343,#16344,#16345,#16346,#16347,#16348,#16349,#16350,
#16351,#16352,#16353,#16354,#16355,#16356,#16357,#16358,#16359,#16360,#16361,
#16362,#16363,#16364,#16365,#16366,#16367,#16368,#16369,#16370,#16371,#16372,
#16373,#16374,#16375,#16376,#16377,#16378,#16379,#16380,#16381,#16382,#16383,
#16384,#16385,#16386,#16387,#16388),(#16389,#16390,#16391,#16392,#16393,
#16394,#16395,#16396,#16397,#16398,#16399,#16400,#16401,#16402,#16403,#16404,
#16405,#16406,#16407,#16408,#16409,#16410,#16411,#16412,#16413,#16414,#16415,
#16416,#16417,#16418,#16419,#16420,#16421,#16422,#16423,#16424,#16425,#16426,
#16427,#16428,#16429,#16430,#16431,#16432,#16433,#16434,#16435,#16436,#16437,
#16438,#16439,#16440,#16441,#16442,#16443,#16444,#16445,#16446,#16447,#16448,
#16449,#16450,#16451,#16452,#16453,#16454,#16455,#16456,#16457,#16458,#16459,
#16460,#16461,#16462,#16463,#16464,#16465,#16466,#16467,#16468,#16469,#16470,
#16471,#16472,#16473,#16474,#16475),(#16476,#16477,#16478,#16479,#16480,
#16481,#16482,#16483,#16484,#16485,#16486,#16487,#16488,#16489,#16490,#16491,
#16492,#16493,#16494,#16495,#16496,#16497,#16498,#16499,#16500,#16501,#16502,
#16503,#16504,#16505,#16506,#16507,#16508,#16509,#16510,#16511,#16512,#16513,
#16514,#16515,#16516,#16517,#16518,#16519,#16520,#16521,#16522,#16523,#16524,
#16525,#16526,#16527,#16528,#16529,#16530,#16531,#16532,#16533,#16534,#16535,
#16536,#16537,#16538,#16539,#16540,#16541,#16542,#16543,#16544,#16545,#16546,
#16547,#16548,#16549,#16550,#16551,#16552,#16553,#16554,#16555,#16556,#16557,
#16558,#16559,#16560,#16561,#16562),(#16563,#16564,#16565,#16566,#16567,
#16568,#16569,#16570,#16571,#16572,#16573,#16574,#16575,#16576,#16577,#16578,
#16579,#16580,#16581,#16582,#16583,#16584,#16585,#16586,#16587,#16588,#16589,
#16590,#16591,#16592,#16593,#16594,#16595,#16596,#16597,#16598,#16599,#16600,
#16601,#16602,#16603,#16604,#16605,#16606,#16607,#16608,#16609,#16610,#16611,
#16612,#16613,#16614,#16615,#16616,#16617,#16618,#16619,#16620,#16621,#16622,
#16623,#16624,#16625,#16626,#16627,#16628,#16629,#16630,#16631,#16632,#16633,
#16634,#16635,#16636,#16637,#16638,#16639,#16640,#16641,#16642,#16643,#16644,
#16645,#16646,#16647,#16648,#16649),(#16650,#16651,#16652,#16653,#16654,
#16655,#16656,#16657,#16658,#16659,#16660,#16661,#16662,#16663,#16664,#16665,
#16666,#16667,#16668,#16669,#16670,#16671,#16672,#16673,#16674,#16675,#16676,
#16677,#16678,#16679,#16680,#16681,#16682,#16683,#16684,#16685,#16686,#16687,
#16688,#16689,#16690,#16691,#16692,#16693,#16694,#16695,#16696,#16697,#16698,
#16699,#16700,#16701,#16702,#16703,#16704,#16705,#16706,#16707,#16708,#16709,
#16710,#16711,#16712,#16713,#16714,#16715,#16716,#16717,#16718,#16719,#16720,
#16721,#16722,#16723,#16724,#16725,#16726,#16727,#16728,#16729,#16730,#16731,
#16732,#16733,#16734,#16735,#16736)),.UNSPECIFIED.,.F.,.F.,.F.,(4,3,1,1,
3,4),(4,1,1,1,1,1,1,1,1,1,1,1,1,1,1,1,1,1,1,1,1,1,1,1,1,1,1,1,1,1,1,1,1,
1,1,1,1,1,1,1,1,1,1,1,1,1,1,1,1,1,1,1,1,1,1,1,1,1,1,1,1,1,1,1,1,1,1,1,1,
1,1,1,1,1,1,1,1,1,1,1,1,1,1,1,4),(-0.855237294951358,-0.838467936226788,
-0.119781133745207,0.359343401242513,0.838467936230234,0.85540498854205),
(32.7241439763348,33.2152755694897,33.7064071626446,34.1975387557996,34.6886703489545,
35.1798019421094,35.6709335352643,36.1620651284192,36.6531967215741,37.1443283147291,
37.635459907884,38.1265915010389,38.6177230941938,39.1088546873487,39.5999862805036,
40.0911178736586,40.5822494668135,41.0733810599684,41.5645126531233,42.0556442462782,
42.5467758394332,43.0379074325881,43.529039025743,44.0201706188979,44.5113022120528,
45.0024338052078,45.4935653983627,45.9846969915176,46.4758285846725,46.9669601778274,
47.4580917709823,47.9492233641373,48.4403549572922,48.9314865504471,49.422618143602,
49.9137497367569,50.4048813299118,50.8960129230668,51.3871445162217,51.8782761093766,
52.3694077025315,52.8605392956864,53.3516708888414,53.8428024819963,54.3339340751512,
54.8250656683061,55.316197261461,55.8073288546159,56.2984604477709,56.7895920409258,
57.2807236340807,57.7718552272356,58.2629868203905,58.7541184135455,59.2452500067004,
59.7363815998553,60.2275131930102,60.7186447861651,61.20977637932,61.700907972475,
62.1920395656299,62.6831711587848,63.1743027519397,63.6654343450946,64.1565659382495,
64.6476975314045,65.1388291245594,65.6299607177143,66.1210923108692,66.6122239040241,
67.1033554971791,67.594487090334,68.0856186834889,68.5767502766438,69.0678818697987,
69.5590134629536,70.0501450561086,70.5412766492635,71.0324082424184,71.5235398355733,
72.0146714287282,72.5058030218832,72.9969346150381,73.488066208193,73.9791978013479),
 .UNSPECIFIED.);
#150=B_SPLINE_SURFACE_WITH_KNOTS('',3,3,((#16800,#16801,#16802,#16803,#16804,
#16805,#16806,#16807,#16808,#16809,#16810,#16811,#16812,#16813,#16814,#16815,
#16816,#16817,#16818,#16819,#16820,#16821,#16822,#16823,#16824,#16825,#16826,
#16827,#16828,#16829,#16830,#16831,#16832,#16833,#16834,#16835,#16836,#16837,
#16838,#16839,#16840,#16841,#16842,#16843,#16844,#16845,#16846,#16847,#16848,
#16849,#16850,#16851,#16852,#16853,#16854,#16855,#16856,#16857,#16858,#16859,
#16860,#16861,#16862,#16863,#16864,#16865,#16866,#16867,#16868,#16869,#16870,
#16871,#16872,#16873,#16874,#16875,#16876,#16877,#16878,#16879,#16880,#16881,
#16882,#16883,#16884,#16885,#16886),(#16887,#16888,#16889,#16890,#16891,
#16892,#16893,#16894,#16895,#16896,#16897,#16898,#16899,#16900,#16901,#16902,
#16903,#16904,#16905,#16906,#16907,#16908,#16909,#16910,#16911,#16912,#16913,
#16914,#16915,#16916,#16917,#16918,#16919,#16920,#16921,#16922,#16923,#16924,
#16925,#16926,#16927,#16928,#16929,#16930,#16931,#16932,#16933,#16934,#16935,
#16936,#16937,#16938,#16939,#16940,#16941,#16942,#16943,#16944,#16945,#16946,
#16947,#16948,#16949,#16950,#16951,#16952,#16953,#16954,#16955,#16956,#16957,
#16958,#16959,#16960,#16961,#16962,#16963,#16964,#16965,#16966,#16967,#16968,
#16969,#16970,#16971,#16972,#16973),(#16974,#16975,#16976,#16977,#16978,
#16979,#16980,#16981,#16982,#16983,#16984,#16985,#16986,#16987,#16988,#16989,
#16990,#16991,#16992,#16993,#16994,#16995,#16996,#16997,#16998,#16999,#17000,
#17001,#17002,#17003,#17004,#17005,#17006,#17007,#17008,#17009,#17010,#17011,
#17012,#17013,#17014,#17015,#17016,#17017,#17018,#17019,#17020,#17021,#17022,
#17023,#17024,#17025,#17026,#17027,#17028,#17029,#17030,#17031,#17032,#17033,
#17034,#17035,#17036,#17037,#17038,#17039,#17040,#17041,#17042,#17043,#17044,
#17045,#17046,#17047,#17048,#17049,#17050,#17051,#17052,#17053,#17054,#17055,
#17056,#17057,#17058,#17059,#17060),(#17061,#17062,#17063,#17064,#17065,
#17066,#17067,#17068,#17069,#17070,#17071,#17072,#17073,#17074,#17075,#17076,
#17077,#17078,#17079,#17080,#17081,#17082,#17083,#17084,#17085,#17086,#17087,
#17088,#17089,#17090,#17091,#17092,#17093,#17094,#17095,#17096,#17097,#17098,
#17099,#17100,#17101,#17102,#17103,#17104,#17105,#17106,#17107,#17108,#17109,
#17110,#17111,#17112,#17113,#17114,#17115,#17116,#17117,#17118,#17119,#17120,
#17121,#17122,#17123,#17124,#17125,#17126,#17127,#17128,#17129,#17130,#17131,
#17132,#17133,#17134,#17135,#17136,#17137,#17138,#17139,#17140,#17141,#17142,
#17143,#17144,#17145,#17146,#17147),(#17148,#17149,#17150,#17151,#17152,
#17153,#17154,#17155,#17156,#17157,#17158,#17159,#17160,#17161,#17162,#17163,
#17164,#17165,#17166,#17167,#17168,#17169,#17170,#17171,#17172,#17173,#17174,
#17175,#17176,#17177,#17178,#17179,#17180,#17181,#17182,#17183,#17184,#17185,
#17186,#17187,#17188,#17189,#17190,#17191,#17192,#17193,#17194,#17195,#17196,
#17197,#17198,#17199,#17200,#17201,#17202,#17203,#17204,#17205,#17206,#17207,
#17208,#17209,#17210,#17211,#17212,#17213,#17214,#17215,#17216,#17217,#17218,
#17219,#17220,#17221,#17222,#17223,#17224,#17225,#17226,#17227,#17228,#17229,
#17230,#17231,#17232,#17233,#17234),(#17235,#17236,#17237,#17238,#17239,
#17240,#17241,#17242,#17243,#17244,#17245,#17246,#17247,#17248,#17249,#17250,
#17251,#17252,#17253,#17254,#17255,#17256,#17257,#17258,#17259,#17260,#17261,
#17262,#17263,#17264,#17265,#17266,#17267,#17268,#17269,#17270,#17271,#17272,
#17273,#17274,#17275,#17276,#17277,#17278,#17279,#17280,#17281,#17282,#17283,
#17284,#17285,#17286,#17287,#17288,#17289,#17290,#17291,#17292,#17293,#17294,
#17295,#17296,#17297,#17298,#17299,#17300,#17301,#17302,#17303,#17304,#17305,
#17306,#17307,#17308,#17309,#17310,#17311,#17312,#17313,#17314,#17315,#17316,
#17317,#17318,#17319,#17320,#17321),(#17322,#17323,#17324,#17325,#17326,
#17327,#17328,#17329,#17330,#17331,#17332,#17333,#17334,#17335,#17336,#17337,
#17338,#17339,#17340,#17341,#17342,#17343,#17344,#17345,#17346,#17347,#17348,
#17349,#17350,#17351,#17352,#17353,#17354,#17355,#17356,#17357,#17358,#17359,
#17360,#17361,#17362,#17363,#17364,#17365,#17366,#17367,#17368,#17369,#17370,
#17371,#17372,#17373,#17374,#17375,#17376,#17377,#17378,#17379,#17380,#17381,
#17382,#17383,#17384,#17385,#17386,#17387,#17388,#17389,#17390,#17391,#17392,
#17393,#17394,#17395,#17396,#17397,#17398,#17399,#17400,#17401,#17402,#17403,
#17404,#17405,#17406,#17407,#17408),(#17409,#17410,#17411,#17412,#17413,
#17414,#17415,#17416,#17417,#17418,#17419,#17420,#17421,#17422,#17423,#17424,
#17425,#17426,#17427,#17428,#17429,#17430,#17431,#17432,#17433,#17434,#17435,
#17436,#17437,#17438,#17439,#17440,#17441,#17442,#17443,#17444,#17445,#17446,
#17447,#17448,#17449,#17450,#17451,#17452,#17453,#17454,#17455,#17456,#17457,
#17458,#17459,#17460,#17461,#17462,#17463,#17464,#17465,#17466,#17467,#17468,
#17469,#17470,#17471,#17472,#17473,#17474,#17475,#17476,#17477,#17478,#17479,
#17480,#17481,#17482,#17483,#17484,#17485,#17486,#17487,#17488,#17489,#17490,
#17491,#17492,#17493,#17494,#17495),(#17496,#17497,#17498,#17499,#17500,
#17501,#17502,#17503,#17504,#17505,#17506,#17507,#17508,#17509,#17510,#17511,
#17512,#17513,#17514,#17515,#17516,#17517,#17518,#17519,#17520,#17521,#17522,
#17523,#17524,#17525,#17526,#17527,#17528,#17529,#17530,#17531,#17532,#17533,
#17534,#17535,#17536,#17537,#17538,#17539,#17540,#17541,#17542,#17543,#17544,
#17545,#17546,#17547,#17548,#17549,#17550,#17551,#17552,#17553,#17554,#17555,
#17556,#17557,#17558,#17559,#17560,#17561,#17562,#17563,#17564,#17565,#17566,
#17567,#17568,#17569,#17570,#17571,#17572,#17573,#17574,#17575,#17576,#17577,
#17578,#17579,#17580,#17581,#17582),(#17583,#17584,#17585,#17586,#17587,
#17588,#17589,#17590,#17591,#17592,#17593,#17594,#17595,#17596,#17597,#17598,
#17599,#17600,#17601,#17602,#17603,#17604,#17605,#17606,#17607,#17608,#17609,
#17610,#17611,#17612,#17613,#17614,#17615,#17616,#17617,#17618,#17619,#17620,
#17621,#17622,#17623,#17624,#17625,#17626,#17627,#17628,#17629,#17630,#17631,
#17632,#17633,#17634,#17635,#17636,#17637,#17638,#17639,#17640,#17641,#17642,
#17643,#17644,#17645,#17646,#17647,#17648,#17649,#17650,#17651,#17652,#17653,
#17654,#17655,#17656,#17657,#17658,#17659,#17660,#17661,#17662,#17663,#17664,
#17665,#17666,#17667,#17668,#17669),(#17670,#17671,#17672,#17673,#17674,
#17675,#17676,#17677,#17678,#17679,#17680,#17681,#17682,#17683,#17684,#17685,
#17686,#17687,#17688,#17689,#17690,#17691,#17692,#17693,#17694,#17695,#17696,
#17697,#17698,#17699,#17700,#17701,#17702,#17703,#17704,#17705,#17706,#17707,
#17708,#17709,#17710,#17711,#17712,#17713,#17714,#17715,#17716,#17717,#17718,
#17719,#17720,#17721,#17722,#17723,#17724,#17725,#17726,#17727,#17728,#17729,
#17730,#17731,#17732,#17733,#17734,#17735,#17736,#17737,#17738,#17739,#17740,
#17741,#17742,#17743,#17744,#17745,#17746,#17747,#17748,#17749,#17750,#17751,
#17752,#17753,#17754,#17755,#17756),(#17757,#17758,#17759,#17760,#17761,
#17762,#17763,#17764,#17765,#17766,#17767,#17768,#17769,#17770,#17771,#17772,
#17773,#17774,#17775,#17776,#17777,#17778,#17779,#17780,#17781,#17782,#17783,
#17784,#17785,#17786,#17787,#17788,#17789,#17790,#17791,#17792,#17793,#17794,
#17795,#17796,#17797,#17798,#17799,#17800,#17801,#17802,#17803,#17804,#17805,
#17806,#17807,#17808,#17809,#17810,#17811,#17812,#17813,#17814,#17815,#17816,
#17817,#17818,#17819,#17820,#17821,#17822,#17823,#17824,#17825,#17826,#17827,
#17828,#17829,#17830,#17831,#17832,#17833,#17834,#17835,#17836,#17837,#17838,
#17839,#17840,#17841,#17842,#17843)),.UNSPECIFIED.,.F.,.F.,.F.,(4,3,1,1,
3,4),(4,1,1,1,1,1,1,1,1,1,1,1,1,1,1,1,1,1,1,1,1,1,1,1,1,1,1,1,1,1,1,1,1,
1,1,1,1,1,1,1,1,1,1,1,1,1,1,1,1,1,1,1,1,1,1,1,1,1,1,1,1,1,1,1,1,1,1,1,1,
1,1,1,1,1,1,1,1,1,1,1,1,1,1,1,4),(-0.855237294951358,-0.838467936226788,
-0.119781133745207,0.359343401242513,0.838467936230234,0.85540498854205),
(32.7241439763348,33.2152755694897,33.7064071626446,34.1975387557996,34.6886703489545,
35.1798019421094,35.6709335352643,36.1620651284192,36.6531967215741,37.1443283147291,
37.635459907884,38.1265915010389,38.6177230941938,39.1088546873487,39.5999862805036,
40.0911178736586,40.5822494668135,41.0733810599684,41.5645126531233,42.0556442462782,
42.5467758394332,43.0379074325881,43.529039025743,44.0201706188979,44.5113022120528,
45.0024338052078,45.4935653983627,45.9846969915176,46.4758285846725,46.9669601778274,
47.4580917709823,47.9492233641373,48.4403549572922,48.9314865504471,49.422618143602,
49.9137497367569,50.4048813299118,50.8960129230668,51.3871445162217,51.8782761093766,
52.3694077025315,52.8605392956864,53.3516708888414,53.8428024819963,54.3339340751512,
54.8250656683061,55.316197261461,55.8073288546159,56.2984604477709,56.7895920409258,
57.2807236340807,57.7718552272356,58.2629868203905,58.7541184135455,59.2452500067004,
59.7363815998553,60.2275131930102,60.7186447861651,61.20977637932,61.700907972475,
62.1920395656299,62.6831711587848,63.1743027519397,63.6654343450946,64.1565659382495,
64.6476975314045,65.1388291245594,65.6299607177143,66.1210923108692,66.6122239040241,
67.1033554971791,67.594487090334,68.0856186834889,68.5767502766438,69.0678818697987,
69.5590134629536,70.0501450561086,70.5412766492635,71.0324082424184,71.5235398355733,
72.0146714287282,72.5058030218832,72.9969346150381,73.488066208193,73.9791978013479),
 .UNSPECIFIED.);
#151=B_SPLINE_SURFACE_WITH_KNOTS('',3,3,((#18284,#18285,#18286,#18287,#18288,
#18289,#18290,#18291,#18292,#18293,#18294,#18295,#18296,#18297,#18298,#18299,
#18300,#18301,#18302,#18303,#18304,#18305,#18306,#18307,#18308,#18309,#18310,
#18311,#18312,#18313,#18314,#18315,#18316,#18317,#18318,#18319,#18320,#18321,
#18322,#18323,#18324,#18325,#18326,#18327,#18328,#18329,#18330,#18331,#18332,
#18333,#18334,#18335,#18336,#18337,#18338,#18339,#18340,#18341,#18342,#18343,
#18344,#18345,#18346,#18347,#18348,#18349,#18350,#18351,#18352,#18353,#18354,
#18355,#18356,#18357,#18358,#18359,#18360,#18361,#18362,#18363,#18364,#18365,
#18366,#18367,#18368,#18369,#18370),(#18371,#18372,#18373,#18374,#18375,
#18376,#18377,#18378,#18379,#18380,#18381,#18382,#18383,#18384,#18385,#18386,
#18387,#18388,#18389,#18390,#18391,#18392,#18393,#18394,#18395,#18396,#18397,
#18398,#18399,#18400,#18401,#18402,#18403,#18404,#18405,#18406,#18407,#18408,
#18409,#18410,#18411,#18412,#18413,#18414,#18415,#18416,#18417,#18418,#18419,
#18420,#18421,#18422,#18423,#18424,#18425,#18426,#18427,#18428,#18429,#18430,
#18431,#18432,#18433,#18434,#18435,#18436,#18437,#18438,#18439,#18440,#18441,
#18442,#18443,#18444,#18445,#18446,#18447,#18448,#18449,#18450,#18451,#18452,
#18453,#18454,#18455,#18456,#18457),(#18458,#18459,#18460,#18461,#18462,
#18463,#18464,#18465,#18466,#18467,#18468,#18469,#18470,#18471,#18472,#18473,
#18474,#18475,#18476,#18477,#18478,#18479,#18480,#18481,#18482,#18483,#18484,
#18485,#18486,#18487,#18488,#18489,#18490,#18491,#18492,#18493,#18494,#18495,
#18496,#18497,#18498,#18499,#18500,#18501,#18502,#18503,#18504,#18505,#18506,
#18507,#18508,#18509,#18510,#18511,#18512,#18513,#18514,#18515,#18516,#18517,
#18518,#18519,#18520,#18521,#18522,#18523,#18524,#18525,#18526,#18527,#18528,
#18529,#18530,#18531,#18532,#18533,#18534,#18535,#18536,#18537,#18538,#18539,
#18540,#18541,#18542,#18543,#18544),(#18545,#18546,#18547,#18548,#18549,
#18550,#18551,#18552,#18553,#18554,#18555,#18556,#18557,#18558,#18559,#18560,
#18561,#18562,#18563,#18564,#18565,#18566,#18567,#18568,#18569,#18570,#18571,
#18572,#18573,#18574,#18575,#18576,#18577,#18578,#18579,#18580,#18581,#18582,
#18583,#18584,#18585,#18586,#18587,#18588,#18589,#18590,#18591,#18592,#18593,
#18594,#18595,#18596,#18597,#18598,#18599,#18600,#18601,#18602,#18603,#18604,
#18605,#18606,#18607,#18608,#18609,#18610,#18611,#18612,#18613,#18614,#18615,
#18616,#18617,#18618,#18619,#18620,#18621,#18622,#18623,#18624,#18625,#18626,
#18627,#18628,#18629,#18630,#18631),(#18632,#18633,#18634,#18635,#18636,
#18637,#18638,#18639,#18640,#18641,#18642,#18643,#18644,#18645,#18646,#18647,
#18648,#18649,#18650,#18651,#18652,#18653,#18654,#18655,#18656,#18657,#18658,
#18659,#18660,#18661,#18662,#18663,#18664,#18665,#18666,#18667,#18668,#18669,
#18670,#18671,#18672,#18673,#18674,#18675,#18676,#18677,#18678,#18679,#18680,
#18681,#18682,#18683,#18684,#18685,#18686,#18687,#18688,#18689,#18690,#18691,
#18692,#18693,#18694,#18695,#18696,#18697,#18698,#18699,#18700,#18701,#18702,
#18703,#18704,#18705,#18706,#18707,#18708,#18709,#18710,#18711,#18712,#18713,
#18714,#18715,#18716,#18717,#18718),(#18719,#18720,#18721,#18722,#18723,
#18724,#18725,#18726,#18727,#18728,#18729,#18730,#18731,#18732,#18733,#18734,
#18735,#18736,#18737,#18738,#18739,#18740,#18741,#18742,#18743,#18744,#18745,
#18746,#18747,#18748,#18749,#18750,#18751,#18752,#18753,#18754,#18755,#18756,
#18757,#18758,#18759,#18760,#18761,#18762,#18763,#18764,#18765,#18766,#18767,
#18768,#18769,#18770,#18771,#18772,#18773,#18774,#18775,#18776,#18777,#18778,
#18779,#18780,#18781,#18782,#18783,#18784,#18785,#18786,#18787,#18788,#18789,
#18790,#18791,#18792,#18793,#18794,#18795,#18796,#18797,#18798,#18799,#18800,
#18801,#18802,#18803,#18804,#18805),(#18806,#18807,#18808,#18809,#18810,
#18811,#18812,#18813,#18814,#18815,#18816,#18817,#18818,#18819,#18820,#18821,
#18822,#18823,#18824,#18825,#18826,#18827,#18828,#18829,#18830,#18831,#18832,
#18833,#18834,#18835,#18836,#18837,#18838,#18839,#18840,#18841,#18842,#18843,
#18844,#18845,#18846,#18847,#18848,#18849,#18850,#18851,#18852,#18853,#18854,
#18855,#18856,#18857,#18858,#18859,#18860,#18861,#18862,#18863,#18864,#18865,
#18866,#18867,#18868,#18869,#18870,#18871,#18872,#18873,#18874,#18875,#18876,
#18877,#18878,#18879,#18880,#18881,#18882,#18883,#18884,#18885,#18886,#18887,
#18888,#18889,#18890,#18891,#18892),(#18893,#18894,#18895,#18896,#18897,
#18898,#18899,#18900,#18901,#18902,#18903,#18904,#18905,#18906,#18907,#18908,
#18909,#18910,#18911,#18912,#18913,#18914,#18915,#18916,#18917,#18918,#18919,
#18920,#18921,#18922,#18923,#18924,#18925,#18926,#18927,#18928,#18929,#18930,
#18931,#18932,#18933,#18934,#18935,#18936,#18937,#18938,#18939,#18940,#18941,
#18942,#18943,#18944,#18945,#18946,#18947,#18948,#18949,#18950,#18951,#18952,
#18953,#18954,#18955,#18956,#18957,#18958,#18959,#18960,#18961,#18962,#18963,
#18964,#18965,#18966,#18967,#18968,#18969,#18970,#18971,#18972,#18973,#18974,
#18975,#18976,#18977,#18978,#18979),(#18980,#18981,#18982,#18983,#18984,
#18985,#18986,#18987,#18988,#18989,#18990,#18991,#18992,#18993,#18994,#18995,
#18996,#18997,#18998,#18999,#19000,#19001,#19002,#19003,#19004,#19005,#19006,
#19007,#19008,#19009,#19010,#19011,#19012,#19013,#19014,#19015,#19016,#19017,
#19018,#19019,#19020,#19021,#19022,#19023,#19024,#19025,#19026,#19027,#19028,
#19029,#19030,#19031,#19032,#19033,#19034,#19035,#19036,#19037,#19038,#19039,
#19040,#19041,#19042,#19043,#19044,#19045,#19046,#19047,#19048,#19049,#19050,
#19051,#19052,#19053,#19054,#19055,#19056,#19057,#19058,#19059,#19060,#19061,
#19062,#19063,#19064,#19065,#19066),(#19067,#19068,#19069,#19070,#19071,
#19072,#19073,#19074,#19075,#19076,#19077,#19078,#19079,#19080,#19081,#19082,
#19083,#19084,#19085,#19086,#19087,#19088,#19089,#19090,#19091,#19092,#19093,
#19094,#19095,#19096,#19097,#19098,#19099,#19100,#19101,#19102,#19103,#19104,
#19105,#19106,#19107,#19108,#19109,#19110,#19111,#19112,#19113,#19114,#19115,
#19116,#19117,#19118,#19119,#19120,#19121,#19122,#19123,#19124,#19125,#19126,
#19127,#19128,#19129,#19130,#19131,#19132,#19133,#19134,#19135,#19136,#19137,
#19138,#19139,#19140,#19141,#19142,#19143,#19144,#19145,#19146,#19147,#19148,
#19149,#19150,#19151,#19152,#19153),(#19154,#19155,#19156,#19157,#19158,
#19159,#19160,#19161,#19162,#19163,#19164,#19165,#19166,#19167,#19168,#19169,
#19170,#19171,#19172,#19173,#19174,#19175,#19176,#19177,#19178,#19179,#19180,
#19181,#19182,#19183,#19184,#19185,#19186,#19187,#19188,#19189,#19190,#19191,
#19192,#19193,#19194,#19195,#19196,#19197,#19198,#19199,#19200,#19201,#19202,
#19203,#19204,#19205,#19206,#19207,#19208,#19209,#19210,#19211,#19212,#19213,
#19214,#19215,#19216,#19217,#19218,#19219,#19220,#19221,#19222,#19223,#19224,
#19225,#19226,#19227,#19228,#19229,#19230,#19231,#19232,#19233,#19234,#19235,
#19236,#19237,#19238,#19239,#19240),(#19241,#19242,#19243,#19244,#19245,
#19246,#19247,#19248,#19249,#19250,#19251,#19252,#19253,#19254,#19255,#19256,
#19257,#19258,#19259,#19260,#19261,#19262,#19263,#19264,#19265,#19266,#19267,
#19268,#19269,#19270,#19271,#19272,#19273,#19274,#19275,#19276,#19277,#19278,
#19279,#19280,#19281,#19282,#19283,#19284,#19285,#19286,#19287,#19288,#19289,
#19290,#19291,#19292,#19293,#19294,#19295,#19296,#19297,#19298,#19299,#19300,
#19301,#19302,#19303,#19304,#19305,#19306,#19307,#19308,#19309,#19310,#19311,
#19312,#19313,#19314,#19315,#19316,#19317,#19318,#19319,#19320,#19321,#19322,
#19323,#19324,#19325,#19326,#19327)),.UNSPECIFIED.,.F.,.F.,.F.,(4,3,1,1,
3,4),(4,1,1,1,1,1,1,1,1,1,1,1,1,1,1,1,1,1,1,1,1,1,1,1,1,1,1,1,1,1,1,1,1,
1,1,1,1,1,1,1,1,1,1,1,1,1,1,1,1,1,1,1,1,1,1,1,1,1,1,1,1,1,1,1,1,1,1,1,1,
1,1,1,1,1,1,1,1,1,1,1,1,1,1,1,4),(-0.855237294951358,-0.838467936226788,
-0.119781133745207,0.359343401242513,0.838467936230234,0.85540498854205),
(32.7241439763348,33.2152755694897,33.7064071626446,34.1975387557996,34.6886703489545,
35.1798019421094,35.6709335352643,36.1620651284192,36.6531967215741,37.1443283147291,
37.635459907884,38.1265915010389,38.6177230941938,39.1088546873487,39.5999862805036,
40.0911178736586,40.5822494668135,41.0733810599684,41.5645126531233,42.0556442462782,
42.5467758394332,43.0379074325881,43.529039025743,44.0201706188979,44.5113022120528,
45.0024338052078,45.4935653983627,45.9846969915176,46.4758285846725,46.9669601778274,
47.4580917709823,47.9492233641373,48.4403549572922,48.9314865504471,49.422618143602,
49.9137497367569,50.4048813299118,50.8960129230668,51.3871445162217,51.8782761093766,
52.3694077025315,52.8605392956864,53.3516708888414,53.8428024819963,54.3339340751512,
54.8250656683061,55.316197261461,55.8073288546159,56.2984604477709,56.7895920409258,
57.2807236340807,57.7718552272356,58.2629868203905,58.7541184135455,59.2452500067004,
59.7363815998553,60.2275131930102,60.7186447861651,61.20977637932,61.700907972475,
62.1920395656299,62.6831711587848,63.1743027519397,63.6654343450946,64.1565659382495,
64.6476975314045,65.1388291245594,65.6299607177143,66.1210923108692,66.6122239040241,
67.1033554971791,67.594487090334,68.0856186834889,68.5767502766438,69.0678818697987,
69.5590134629536,70.0501450561086,70.5412766492635,71.0324082424184,71.5235398355733,
72.0146714287282,72.5058030218832,72.9969346150381,73.488066208193,73.9791978013479),
 .UNSPECIFIED.);
#152=B_SPLINE_SURFACE_WITH_KNOTS('',3,3,((#20112,#20113,#20114,#20115,#20116,
#20117,#20118,#20119,#20120,#20121,#20122,#20123,#20124,#20125,#20126,#20127,
#20128,#20129,#20130,#20131,#20132,#20133,#20134,#20135,#20136,#20137,#20138,
#20139,#20140,#20141,#20142,#20143,#20144,#20145,#20146,#20147,#20148,#20149,
#20150,#20151,#20152,#20153,#20154,#20155,#20156,#20157,#20158,#20159,#20160,
#20161,#20162,#20163,#20164,#20165,#20166,#20167,#20168,#20169,#20170,#20171,
#20172,#20173,#20174,#20175,#20176,#20177,#20178,#20179,#20180,#20181,#20182,
#20183,#20184,#20185,#20186,#20187,#20188,#20189,#20190,#20191,#20192,#20193,
#20194,#20195,#20196,#20197,#20198),(#20199,#20200,#20201,#20202,#20203,
#20204,#20205,#20206,#20207,#20208,#20209,#20210,#20211,#20212,#20213,#20214,
#20215,#20216,#20217,#20218,#20219,#20220,#20221,#20222,#20223,#20224,#20225,
#20226,#20227,#20228,#20229,#20230,#20231,#20232,#20233,#20234,#20235,#20236,
#20237,#20238,#20239,#20240,#20241,#20242,#20243,#20244,#20245,#20246,#20247,
#20248,#20249,#20250,#20251,#20252,#20253,#20254,#20255,#20256,#20257,#20258,
#20259,#20260,#20261,#20262,#20263,#20264,#20265,#20266,#20267,#20268,#20269,
#20270,#20271,#20272,#20273,#20274,#20275,#20276,#20277,#20278,#20279,#20280,
#20281,#20282,#20283,#20284,#20285),(#20286,#20287,#20288,#20289,#20290,
#20291,#20292,#20293,#20294,#20295,#20296,#20297,#20298,#20299,#20300,#20301,
#20302,#20303,#20304,#20305,#20306,#20307,#20308,#20309,#20310,#20311,#20312,
#20313,#20314,#20315,#20316,#20317,#20318,#20319,#20320,#20321,#20322,#20323,
#20324,#20325,#20326,#20327,#20328,#20329,#20330,#20331,#20332,#20333,#20334,
#20335,#20336,#20337,#20338,#20339,#20340,#20341,#20342,#20343,#20344,#20345,
#20346,#20347,#20348,#20349,#20350,#20351,#20352,#20353,#20354,#20355,#20356,
#20357,#20358,#20359,#20360,#20361,#20362,#20363,#20364,#20365,#20366,#20367,
#20368,#20369,#20370,#20371,#20372),(#20373,#20374,#20375,#20376,#20377,
#20378,#20379,#20380,#20381,#20382,#20383,#20384,#20385,#20386,#20387,#20388,
#20389,#20390,#20391,#20392,#20393,#20394,#20395,#20396,#20397,#20398,#20399,
#20400,#20401,#20402,#20403,#20404,#20405,#20406,#20407,#20408,#20409,#20410,
#20411,#20412,#20413,#20414,#20415,#20416,#20417,#20418,#20419,#20420,#20421,
#20422,#20423,#20424,#20425,#20426,#20427,#20428,#20429,#20430,#20431,#20432,
#20433,#20434,#20435,#20436,#20437,#20438,#20439,#20440,#20441,#20442,#20443,
#20444,#20445,#20446,#20447,#20448,#20449,#20450,#20451,#20452,#20453,#20454,
#20455,#20456,#20457,#20458,#20459),(#20460,#20461,#20462,#20463,#20464,
#20465,#20466,#20467,#20468,#20469,#20470,#20471,#20472,#20473,#20474,#20475,
#20476,#20477,#20478,#20479,#20480,#20481,#20482,#20483,#20484,#20485,#20486,
#20487,#20488,#20489,#20490,#20491,#20492,#20493,#20494,#20495,#20496,#20497,
#20498,#20499,#20500,#20501,#20502,#20503,#20504,#20505,#20506,#20507,#20508,
#20509,#20510,#20511,#20512,#20513,#20514,#20515,#20516,#20517,#20518,#20519,
#20520,#20521,#20522,#20523,#20524,#20525,#20526,#20527,#20528,#20529,#20530,
#20531,#20532,#20533,#20534,#20535,#20536,#20537,#20538,#20539,#20540,#20541,
#20542,#20543,#20544,#20545,#20546),(#20547,#20548,#20549,#20550,#20551,
#20552,#20553,#20554,#20555,#20556,#20557,#20558,#20559,#20560,#20561,#20562,
#20563,#20564,#20565,#20566,#20567,#20568,#20569,#20570,#20571,#20572,#20573,
#20574,#20575,#20576,#20577,#20578,#20579,#20580,#20581,#20582,#20583,#20584,
#20585,#20586,#20587,#20588,#20589,#20590,#20591,#20592,#20593,#20594,#20595,
#20596,#20597,#20598,#20599,#20600,#20601,#20602,#20603,#20604,#20605,#20606,
#20607,#20608,#20609,#20610,#20611,#20612,#20613,#20614,#20615,#20616,#20617,
#20618,#20619,#20620,#20621,#20622,#20623,#20624,#20625,#20626,#20627,#20628,
#20629,#20630,#20631,#20632,#20633),(#20634,#20635,#20636,#20637,#20638,
#20639,#20640,#20641,#20642,#20643,#20644,#20645,#20646,#20647,#20648,#20649,
#20650,#20651,#20652,#20653,#20654,#20655,#20656,#20657,#20658,#20659,#20660,
#20661,#20662,#20663,#20664,#20665,#20666,#20667,#20668,#20669,#20670,#20671,
#20672,#20673,#20674,#20675,#20676,#20677,#20678,#20679,#20680,#20681,#20682,
#20683,#20684,#20685,#20686,#20687,#20688,#20689,#20690,#20691,#20692,#20693,
#20694,#20695,#20696,#20697,#20698,#20699,#20700,#20701,#20702,#20703,#20704,
#20705,#20706,#20707,#20708,#20709,#20710,#20711,#20712,#20713,#20714,#20715,
#20716,#20717,#20718,#20719,#20720),(#20721,#20722,#20723,#20724,#20725,
#20726,#20727,#20728,#20729,#20730,#20731,#20732,#20733,#20734,#20735,#20736,
#20737,#20738,#20739,#20740,#20741,#20742,#20743,#20744,#20745,#20746,#20747,
#20748,#20749,#20750,#20751,#20752,#20753,#20754,#20755,#20756,#20757,#20758,
#20759,#20760,#20761,#20762,#20763,#20764,#20765,#20766,#20767,#20768,#20769,
#20770,#20771,#20772,#20773,#20774,#20775,#20776,#20777,#20778,#20779,#20780,
#20781,#20782,#20783,#20784,#20785,#20786,#20787,#20788,#20789,#20790,#20791,
#20792,#20793,#20794,#20795,#20796,#20797,#20798,#20799,#20800,#20801,#20802,
#20803,#20804,#20805,#20806,#20807),(#20808,#20809,#20810,#20811,#20812,
#20813,#20814,#20815,#20816,#20817,#20818,#20819,#20820,#20821,#20822,#20823,
#20824,#20825,#20826,#20827,#20828,#20829,#20830,#20831,#20832,#20833,#20834,
#20835,#20836,#20837,#20838,#20839,#20840,#20841,#20842,#20843,#20844,#20845,
#20846,#20847,#20848,#20849,#20850,#20851,#20852,#20853,#20854,#20855,#20856,
#20857,#20858,#20859,#20860,#20861,#20862,#20863,#20864,#20865,#20866,#20867,
#20868,#20869,#20870,#20871,#20872,#20873,#20874,#20875,#20876,#20877,#20878,
#20879,#20880,#20881,#20882,#20883,#20884,#20885,#20886,#20887,#20888,#20889,
#20890,#20891,#20892,#20893,#20894),(#20895,#20896,#20897,#20898,#20899,
#20900,#20901,#20902,#20903,#20904,#20905,#20906,#20907,#20908,#20909,#20910,
#20911,#20912,#20913,#20914,#20915,#20916,#20917,#20918,#20919,#20920,#20921,
#20922,#20923,#20924,#20925,#20926,#20927,#20928,#20929,#20930,#20931,#20932,
#20933,#20934,#20935,#20936,#20937,#20938,#20939,#20940,#20941,#20942,#20943,
#20944,#20945,#20946,#20947,#20948,#20949,#20950,#20951,#20952,#20953,#20954,
#20955,#20956,#20957,#20958,#20959,#20960,#20961,#20962,#20963,#20964,#20965,
#20966,#20967,#20968,#20969,#20970,#20971,#20972,#20973,#20974,#20975,#20976,
#20977,#20978,#20979,#20980,#20981),(#20982,#20983,#20984,#20985,#20986,
#20987,#20988,#20989,#20990,#20991,#20992,#20993,#20994,#20995,#20996,#20997,
#20998,#20999,#21000,#21001,#21002,#21003,#21004,#21005,#21006,#21007,#21008,
#21009,#21010,#21011,#21012,#21013,#21014,#21015,#21016,#21017,#21018,#21019,
#21020,#21021,#21022,#21023,#21024,#21025,#21026,#21027,#21028,#21029,#21030,
#21031,#21032,#21033,#21034,#21035,#21036,#21037,#21038,#21039,#21040,#21041,
#21042,#21043,#21044,#21045,#21046,#21047,#21048,#21049,#21050,#21051,#21052,
#21053,#21054,#21055,#21056,#21057,#21058,#21059,#21060,#21061,#21062,#21063,
#21064,#21065,#21066,#21067,#21068),(#21069,#21070,#21071,#21072,#21073,
#21074,#21075,#21076,#21077,#21078,#21079,#21080,#21081,#21082,#21083,#21084,
#21085,#21086,#21087,#21088,#21089,#21090,#21091,#21092,#21093,#21094,#21095,
#21096,#21097,#21098,#21099,#21100,#21101,#21102,#21103,#21104,#21105,#21106,
#21107,#21108,#21109,#21110,#21111,#21112,#21113,#21114,#21115,#21116,#21117,
#21118,#21119,#21120,#21121,#21122,#21123,#21124,#21125,#21126,#21127,#21128,
#21129,#21130,#21131,#21132,#21133,#21134,#21135,#21136,#21137,#21138,#21139,
#21140,#21141,#21142,#21143,#21144,#21145,#21146,#21147,#21148,#21149,#21150,
#21151,#21152,#21153,#21154,#21155)),.UNSPECIFIED.,.F.,.F.,.F.,(4,3,1,1,
3,4),(4,1,1,1,1,1,1,1,1,1,1,1,1,1,1,1,1,1,1,1,1,1,1,1,1,1,1,1,1,1,1,1,1,
1,1,1,1,1,1,1,1,1,1,1,1,1,1,1,1,1,1,1,1,1,1,1,1,1,1,1,1,1,1,1,1,1,1,1,1,
1,1,1,1,1,1,1,1,1,1,1,1,1,1,1,4),(-0.855237294951358,-0.838467936226788,
-0.119781133745207,0.359343401242513,0.838467936230234,0.85540498854205),
(32.7241439763348,33.2152755694897,33.7064071626446,34.1975387557996,34.6886703489545,
35.1798019421094,35.6709335352643,36.1620651284192,36.6531967215741,37.1443283147291,
37.635459907884,38.1265915010389,38.6177230941938,39.1088546873487,39.5999862805036,
40.0911178736586,40.5822494668135,41.0733810599684,41.5645126531233,42.0556442462782,
42.5467758394332,43.0379074325881,43.529039025743,44.0201706188979,44.5113022120528,
45.0024338052078,45.4935653983627,45.9846969915176,46.4758285846725,46.9669601778274,
47.4580917709823,47.9492233641373,48.4403549572922,48.9314865504471,49.422618143602,
49.9137497367569,50.4048813299118,50.8960129230668,51.3871445162217,51.8782761093766,
52.3694077025315,52.8605392956864,53.3516708888414,53.8428024819963,54.3339340751512,
54.8250656683061,55.316197261461,55.8073288546159,56.2984604477709,56.7895920409258,
57.2807236340807,57.7718552272356,58.2629868203905,58.7541184135455,59.2452500067004,
59.7363815998553,60.2275131930102,60.7186447861651,61.20977637932,61.700907972475,
62.1920395656299,62.6831711587848,63.1743027519397,63.6654343450946,64.1565659382495,
64.6476975314045,65.1388291245594,65.6299607177143,66.1210923108692,66.6122239040241,
67.1033554971791,67.594487090334,68.0856186834889,68.5767502766438,69.0678818697987,
69.5590134629536,70.0501450561086,70.5412766492635,71.0324082424184,71.5235398355733,
72.0146714287282,72.5058030218832,72.9969346150381,73.488066208193,73.9791978013479),
 .UNSPECIFIED.);
#153=B_SPLINE_SURFACE_WITH_KNOTS('',3,3,((#21980,#21981,#21982,#21983,#21984,
#21985,#21986,#21987,#21988,#21989,#21990,#21991,#21992,#21993,#21994,#21995,
#21996,#21997,#21998,#21999,#22000,#22001,#22002,#22003,#22004,#22005,#22006,
#22007,#22008,#22009,#22010,#22011,#22012,#22013,#22014,#22015,#22016,#22017,
#22018,#22019,#22020,#22021,#22022,#22023,#22024,#22025,#22026,#22027,#22028,
#22029,#22030,#22031,#22032,#22033,#22034,#22035,#22036,#22037,#22038,#22039,
#22040,#22041,#22042,#22043,#22044,#22045,#22046,#22047,#22048,#22049,#22050,
#22051,#22052,#22053,#22054,#22055,#22056,#22057,#22058,#22059,#22060,#22061,
#22062,#22063,#22064,#22065,#22066),(#22067,#22068,#22069,#22070,#22071,
#22072,#22073,#22074,#22075,#22076,#22077,#22078,#22079,#22080,#22081,#22082,
#22083,#22084,#22085,#22086,#22087,#22088,#22089,#22090,#22091,#22092,#22093,
#22094,#22095,#22096,#22097,#22098,#22099,#22100,#22101,#22102,#22103,#22104,
#22105,#22106,#22107,#22108,#22109,#22110,#22111,#22112,#22113,#22114,#22115,
#22116,#22117,#22118,#22119,#22120,#22121,#22122,#22123,#22124,#22125,#22126,
#22127,#22128,#22129,#22130,#22131,#22132,#22133,#22134,#22135,#22136,#22137,
#22138,#22139,#22140,#22141,#22142,#22143,#22144,#22145,#22146,#22147,#22148,
#22149,#22150,#22151,#22152,#22153),(#22154,#22155,#22156,#22157,#22158,
#22159,#22160,#22161,#22162,#22163,#22164,#22165,#22166,#22167,#22168,#22169,
#22170,#22171,#22172,#22173,#22174,#22175,#22176,#22177,#22178,#22179,#22180,
#22181,#22182,#22183,#22184,#22185,#22186,#22187,#22188,#22189,#22190,#22191,
#22192,#22193,#22194,#22195,#22196,#22197,#22198,#22199,#22200,#22201,#22202,
#22203,#22204,#22205,#22206,#22207,#22208,#22209,#22210,#22211,#22212,#22213,
#22214,#22215,#22216,#22217,#22218,#22219,#22220,#22221,#22222,#22223,#22224,
#22225,#22226,#22227,#22228,#22229,#22230,#22231,#22232,#22233,#22234,#22235,
#22236,#22237,#22238,#22239,#22240),(#22241,#22242,#22243,#22244,#22245,
#22246,#22247,#22248,#22249,#22250,#22251,#22252,#22253,#22254,#22255,#22256,
#22257,#22258,#22259,#22260,#22261,#22262,#22263,#22264,#22265,#22266,#22267,
#22268,#22269,#22270,#22271,#22272,#22273,#22274,#22275,#22276,#22277,#22278,
#22279,#22280,#22281,#22282,#22283,#22284,#22285,#22286,#22287,#22288,#22289,
#22290,#22291,#22292,#22293,#22294,#22295,#22296,#22297,#22298,#22299,#22300,
#22301,#22302,#22303,#22304,#22305,#22306,#22307,#22308,#22309,#22310,#22311,
#22312,#22313,#22314,#22315,#22316,#22317,#22318,#22319,#22320,#22321,#22322,
#22323,#22324,#22325,#22326,#22327),(#22328,#22329,#22330,#22331,#22332,
#22333,#22334,#22335,#22336,#22337,#22338,#22339,#22340,#22341,#22342,#22343,
#22344,#22345,#22346,#22347,#22348,#22349,#22350,#22351,#22352,#22353,#22354,
#22355,#22356,#22357,#22358,#22359,#22360,#22361,#22362,#22363,#22364,#22365,
#22366,#22367,#22368,#22369,#22370,#22371,#22372,#22373,#22374,#22375,#22376,
#22377,#22378,#22379,#22380,#22381,#22382,#22383,#22384,#22385,#22386,#22387,
#22388,#22389,#22390,#22391,#22392,#22393,#22394,#22395,#22396,#22397,#22398,
#22399,#22400,#22401,#22402,#22403,#22404,#22405,#22406,#22407,#22408,#22409,
#22410,#22411,#22412,#22413,#22414),(#22415,#22416,#22417,#22418,#22419,
#22420,#22421,#22422,#22423,#22424,#22425,#22426,#22427,#22428,#22429,#22430,
#22431,#22432,#22433,#22434,#22435,#22436,#22437,#22438,#22439,#22440,#22441,
#22442,#22443,#22444,#22445,#22446,#22447,#22448,#22449,#22450,#22451,#22452,
#22453,#22454,#22455,#22456,#22457,#22458,#22459,#22460,#22461,#22462,#22463,
#22464,#22465,#22466,#22467,#22468,#22469,#22470,#22471,#22472,#22473,#22474,
#22475,#22476,#22477,#22478,#22479,#22480,#22481,#22482,#22483,#22484,#22485,
#22486,#22487,#22488,#22489,#22490,#22491,#22492,#22493,#22494,#22495,#22496,
#22497,#22498,#22499,#22500,#22501),(#22502,#22503,#22504,#22505,#22506,
#22507,#22508,#22509,#22510,#22511,#22512,#22513,#22514,#22515,#22516,#22517,
#22518,#22519,#22520,#22521,#22522,#22523,#22524,#22525,#22526,#22527,#22528,
#22529,#22530,#22531,#22532,#22533,#22534,#22535,#22536,#22537,#22538,#22539,
#22540,#22541,#22542,#22543,#22544,#22545,#22546,#22547,#22548,#22549,#22550,
#22551,#22552,#22553,#22554,#22555,#22556,#22557,#22558,#22559,#22560,#22561,
#22562,#22563,#22564,#22565,#22566,#22567,#22568,#22569,#22570,#22571,#22572,
#22573,#22574,#22575,#22576,#22577,#22578,#22579,#22580,#22581,#22582,#22583,
#22584,#22585,#22586,#22587,#22588),(#22589,#22590,#22591,#22592,#22593,
#22594,#22595,#22596,#22597,#22598,#22599,#22600,#22601,#22602,#22603,#22604,
#22605,#22606,#22607,#22608,#22609,#22610,#22611,#22612,#22613,#22614,#22615,
#22616,#22617,#22618,#22619,#22620,#22621,#22622,#22623,#22624,#22625,#22626,
#22627,#22628,#22629,#22630,#22631,#22632,#22633,#22634,#22635,#22636,#22637,
#22638,#22639,#22640,#22641,#22642,#22643,#22644,#22645,#22646,#22647,#22648,
#22649,#22650,#22651,#22652,#22653,#22654,#22655,#22656,#22657,#22658,#22659,
#22660,#22661,#22662,#22663,#22664,#22665,#22666,#22667,#22668,#22669,#22670,
#22671,#22672,#22673,#22674,#22675),(#22676,#22677,#22678,#22679,#22680,
#22681,#22682,#22683,#22684,#22685,#22686,#22687,#22688,#22689,#22690,#22691,
#22692,#22693,#22694,#22695,#22696,#22697,#22698,#22699,#22700,#22701,#22702,
#22703,#22704,#22705,#22706,#22707,#22708,#22709,#22710,#22711,#22712,#22713,
#22714,#22715,#22716,#22717,#22718,#22719,#22720,#22721,#22722,#22723,#22724,
#22725,#22726,#22727,#22728,#22729,#22730,#22731,#22732,#22733,#22734,#22735,
#22736,#22737,#22738,#22739,#22740,#22741,#22742,#22743,#22744,#22745,#22746,
#22747,#22748,#22749,#22750,#22751,#22752,#22753,#22754,#22755,#22756,#22757,
#22758,#22759,#22760,#22761,#22762),(#22763,#22764,#22765,#22766,#22767,
#22768,#22769,#22770,#22771,#22772,#22773,#22774,#22775,#22776,#22777,#22778,
#22779,#22780,#22781,#22782,#22783,#22784,#22785,#22786,#22787,#22788,#22789,
#22790,#22791,#22792,#22793,#22794,#22795,#22796,#22797,#22798,#22799,#22800,
#22801,#22802,#22803,#22804,#22805,#22806,#22807,#22808,#22809,#22810,#22811,
#22812,#22813,#22814,#22815,#22816,#22817,#22818,#22819,#22820,#22821,#22822,
#22823,#22824,#22825,#22826,#22827,#22828,#22829,#22830,#22831,#22832,#22833,
#22834,#22835,#22836,#22837,#22838,#22839,#22840,#22841,#22842,#22843,#22844,
#22845,#22846,#22847,#22848,#22849),(#22850,#22851,#22852,#22853,#22854,
#22855,#22856,#22857,#22858,#22859,#22860,#22861,#22862,#22863,#22864,#22865,
#22866,#22867,#22868,#22869,#22870,#22871,#22872,#22873,#22874,#22875,#22876,
#22877,#22878,#22879,#22880,#22881,#22882,#22883,#22884,#22885,#22886,#22887,
#22888,#22889,#22890,#22891,#22892,#22893,#22894,#22895,#22896,#22897,#22898,
#22899,#22900,#22901,#22902,#22903,#22904,#22905,#22906,#22907,#22908,#22909,
#22910,#22911,#22912,#22913,#22914,#22915,#22916,#22917,#22918,#22919,#22920,
#22921,#22922,#22923,#22924,#22925,#22926,#22927,#22928,#22929,#22930,#22931,
#22932,#22933,#22934,#22935,#22936),(#22937,#22938,#22939,#22940,#22941,
#22942,#22943,#22944,#22945,#22946,#22947,#22948,#22949,#22950,#22951,#22952,
#22953,#22954,#22955,#22956,#22957,#22958,#22959,#22960,#22961,#22962,#22963,
#22964,#22965,#22966,#22967,#22968,#22969,#22970,#22971,#22972,#22973,#22974,
#22975,#22976,#22977,#22978,#22979,#22980,#22981,#22982,#22983,#22984,#22985,
#22986,#22987,#22988,#22989,#22990,#22991,#22992,#22993,#22994,#22995,#22996,
#22997,#22998,#22999,#23000,#23001,#23002,#23003,#23004,#23005,#23006,#23007,
#23008,#23009,#23010,#23011,#23012,#23013,#23014,#23015,#23016,#23017,#23018,
#23019,#23020,#23021,#23022,#23023)),.UNSPECIFIED.,.F.,.F.,.F.,(4,3,1,1,
3,4),(4,1,1,1,1,1,1,1,1,1,1,1,1,1,1,1,1,1,1,1,1,1,1,1,1,1,1,1,1,1,1,1,1,
1,1,1,1,1,1,1,1,1,1,1,1,1,1,1,1,1,1,1,1,1,1,1,1,1,1,1,1,1,1,1,1,1,1,1,1,
1,1,1,1,1,1,1,1,1,1,1,1,1,1,1,4),(-0.855237294951358,-0.838467936226788,
-0.119781133745207,0.359343401242513,0.838467936230234,0.85540498854205),
(32.7241439763348,33.2152755694897,33.7064071626446,34.1975387557996,34.6886703489545,
35.1798019421094,35.6709335352643,36.1620651284192,36.6531967215741,37.1443283147291,
37.635459907884,38.1265915010389,38.6177230941938,39.1088546873487,39.5999862805036,
40.0911178736586,40.5822494668135,41.0733810599684,41.5645126531233,42.0556442462782,
42.5467758394332,43.0379074325881,43.529039025743,44.0201706188979,44.5113022120528,
45.0024338052078,45.4935653983627,45.9846969915176,46.4758285846725,46.9669601778274,
47.4580917709823,47.9492233641373,48.4403549572922,48.9314865504471,49.422618143602,
49.9137497367569,50.4048813299118,50.8960129230668,51.3871445162217,51.8782761093766,
52.3694077025315,52.8605392956864,53.3516708888414,53.8428024819963,54.3339340751512,
54.8250656683061,55.316197261461,55.8073288546159,56.2984604477709,56.7895920409258,
57.2807236340807,57.7718552272356,58.2629868203905,58.7541184135455,59.2452500067004,
59.7363815998553,60.2275131930102,60.7186447861651,61.20977637932,61.700907972475,
62.1920395656299,62.6831711587848,63.1743027519397,63.6654343450946,64.1565659382495,
64.6476975314045,65.1388291245594,65.6299607177143,66.1210923108692,66.6122239040241,
67.1033554971791,67.594487090334,68.0856186834889,68.5767502766438,69.0678818697987,
69.5590134629536,70.0501450561086,70.5412766492635,71.0324082424184,71.5235398355733,
72.0146714287282,72.5058030218832,72.9969346150381,73.488066208193,73.9791978013479),
 .UNSPECIFIED.);
#154=B_SPLINE_SURFACE_WITH_KNOTS('',3,3,((#23173,#23174,#23175,#23176,#23177,
#23178,#23179,#23180,#23181,#23182,#23183,#23184,#23185,#23186,#23187,#23188,
#23189,#23190,#23191,#23192,#23193,#23194,#23195,#23196,#23197,#23198,#23199,
#23200,#23201,#23202,#23203,#23204,#23205,#23206,#23207,#23208,#23209,#23210,
#23211,#23212,#23213,#23214,#23215,#23216,#23217,#23218,#23219,#23220,#23221,
#23222,#23223,#23224,#23225,#23226,#23227,#23228,#23229,#23230,#23231,#23232,
#23233,#23234,#23235,#23236,#23237,#23238,#23239,#23240,#23241,#23242,#23243,
#23244,#23245,#23246,#23247,#23248,#23249,#23250,#23251,#23252,#23253,#23254,
#23255,#23256,#23257,#23258,#23259),(#23260,#23261,#23262,#23263,#23264,
#23265,#23266,#23267,#23268,#23269,#23270,#23271,#23272,#23273,#23274,#23275,
#23276,#23277,#23278,#23279,#23280,#23281,#23282,#23283,#23284,#23285,#23286,
#23287,#23288,#23289,#23290,#23291,#23292,#23293,#23294,#23295,#23296,#23297,
#23298,#23299,#23300,#23301,#23302,#23303,#23304,#23305,#23306,#23307,#23308,
#23309,#23310,#23311,#23312,#23313,#23314,#23315,#23316,#23317,#23318,#23319,
#23320,#23321,#23322,#23323,#23324,#23325,#23326,#23327,#23328,#23329,#23330,
#23331,#23332,#23333,#23334,#23335,#23336,#23337,#23338,#23339,#23340,#23341,
#23342,#23343,#23344,#23345,#23346),(#23347,#23348,#23349,#23350,#23351,
#23352,#23353,#23354,#23355,#23356,#23357,#23358,#23359,#23360,#23361,#23362,
#23363,#23364,#23365,#23366,#23367,#23368,#23369,#23370,#23371,#23372,#23373,
#23374,#23375,#23376,#23377,#23378,#23379,#23380,#23381,#23382,#23383,#23384,
#23385,#23386,#23387,#23388,#23389,#23390,#23391,#23392,#23393,#23394,#23395,
#23396,#23397,#23398,#23399,#23400,#23401,#23402,#23403,#23404,#23405,#23406,
#23407,#23408,#23409,#23410,#23411,#23412,#23413,#23414,#23415,#23416,#23417,
#23418,#23419,#23420,#23421,#23422,#23423,#23424,#23425,#23426,#23427,#23428,
#23429,#23430,#23431,#23432,#23433),(#23434,#23435,#23436,#23437,#23438,
#23439,#23440,#23441,#23442,#23443,#23444,#23445,#23446,#23447,#23448,#23449,
#23450,#23451,#23452,#23453,#23454,#23455,#23456,#23457,#23458,#23459,#23460,
#23461,#23462,#23463,#23464,#23465,#23466,#23467,#23468,#23469,#23470,#23471,
#23472,#23473,#23474,#23475,#23476,#23477,#23478,#23479,#23480,#23481,#23482,
#23483,#23484,#23485,#23486,#23487,#23488,#23489,#23490,#23491,#23492,#23493,
#23494,#23495,#23496,#23497,#23498,#23499,#23500,#23501,#23502,#23503,#23504,
#23505,#23506,#23507,#23508,#23509,#23510,#23511,#23512,#23513,#23514,#23515,
#23516,#23517,#23518,#23519,#23520),(#23521,#23522,#23523,#23524,#23525,
#23526,#23527,#23528,#23529,#23530,#23531,#23532,#23533,#23534,#23535,#23536,
#23537,#23538,#23539,#23540,#23541,#23542,#23543,#23544,#23545,#23546,#23547,
#23548,#23549,#23550,#23551,#23552,#23553,#23554,#23555,#23556,#23557,#23558,
#23559,#23560,#23561,#23562,#23563,#23564,#23565,#23566,#23567,#23568,#23569,
#23570,#23571,#23572,#23573,#23574,#23575,#23576,#23577,#23578,#23579,#23580,
#23581,#23582,#23583,#23584,#23585,#23586,#23587,#23588,#23589,#23590,#23591,
#23592,#23593,#23594,#23595,#23596,#23597,#23598,#23599,#23600,#23601,#23602,
#23603,#23604,#23605,#23606,#23607),(#23608,#23609,#23610,#23611,#23612,
#23613,#23614,#23615,#23616,#23617,#23618,#23619,#23620,#23621,#23622,#23623,
#23624,#23625,#23626,#23627,#23628,#23629,#23630,#23631,#23632,#23633,#23634,
#23635,#23636,#23637,#23638,#23639,#23640,#23641,#23642,#23643,#23644,#23645,
#23646,#23647,#23648,#23649,#23650,#23651,#23652,#23653,#23654,#23655,#23656,
#23657,#23658,#23659,#23660,#23661,#23662,#23663,#23664,#23665,#23666,#23667,
#23668,#23669,#23670,#23671,#23672,#23673,#23674,#23675,#23676,#23677,#23678,
#23679,#23680,#23681,#23682,#23683,#23684,#23685,#23686,#23687,#23688,#23689,
#23690,#23691,#23692,#23693,#23694),(#23695,#23696,#23697,#23698,#23699,
#23700,#23701,#23702,#23703,#23704,#23705,#23706,#23707,#23708,#23709,#23710,
#23711,#23712,#23713,#23714,#23715,#23716,#23717,#23718,#23719,#23720,#23721,
#23722,#23723,#23724,#23725,#23726,#23727,#23728,#23729,#23730,#23731,#23732,
#23733,#23734,#23735,#23736,#23737,#23738,#23739,#23740,#23741,#23742,#23743,
#23744,#23745,#23746,#23747,#23748,#23749,#23750,#23751,#23752,#23753,#23754,
#23755,#23756,#23757,#23758,#23759,#23760,#23761,#23762,#23763,#23764,#23765,
#23766,#23767,#23768,#23769,#23770,#23771,#23772,#23773,#23774,#23775,#23776,
#23777,#23778,#23779,#23780,#23781),(#23782,#23783,#23784,#23785,#23786,
#23787,#23788,#23789,#23790,#23791,#23792,#23793,#23794,#23795,#23796,#23797,
#23798,#23799,#23800,#23801,#23802,#23803,#23804,#23805,#23806,#23807,#23808,
#23809,#23810,#23811,#23812,#23813,#23814,#23815,#23816,#23817,#23818,#23819,
#23820,#23821,#23822,#23823,#23824,#23825,#23826,#23827,#23828,#23829,#23830,
#23831,#23832,#23833,#23834,#23835,#23836,#23837,#23838,#23839,#23840,#23841,
#23842,#23843,#23844,#23845,#23846,#23847,#23848,#23849,#23850,#23851,#23852,
#23853,#23854,#23855,#23856,#23857,#23858,#23859,#23860,#23861,#23862,#23863,
#23864,#23865,#23866,#23867,#23868),(#23869,#23870,#23871,#23872,#23873,
#23874,#23875,#23876,#23877,#23878,#23879,#23880,#23881,#23882,#23883,#23884,
#23885,#23886,#23887,#23888,#23889,#23890,#23891,#23892,#23893,#23894,#23895,
#23896,#23897,#23898,#23899,#23900,#23901,#23902,#23903,#23904,#23905,#23906,
#23907,#23908,#23909,#23910,#23911,#23912,#23913,#23914,#23915,#23916,#23917,
#23918,#23919,#23920,#23921,#23922,#23923,#23924,#23925,#23926,#23927,#23928,
#23929,#23930,#23931,#23932,#23933,#23934,#23935,#23936,#23937,#23938,#23939,
#23940,#23941,#23942,#23943,#23944,#23945,#23946,#23947,#23948,#23949,#23950,
#23951,#23952,#23953,#23954,#23955),(#23956,#23957,#23958,#23959,#23960,
#23961,#23962,#23963,#23964,#23965,#23966,#23967,#23968,#23969,#23970,#23971,
#23972,#23973,#23974,#23975,#23976,#23977,#23978,#23979,#23980,#23981,#23982,
#23983,#23984,#23985,#23986,#23987,#23988,#23989,#23990,#23991,#23992,#23993,
#23994,#23995,#23996,#23997,#23998,#23999,#24000,#24001,#24002,#24003,#24004,
#24005,#24006,#24007,#24008,#24009,#24010,#24011,#24012,#24013,#24014,#24015,
#24016,#24017,#24018,#24019,#24020,#24021,#24022,#24023,#24024,#24025,#24026,
#24027,#24028,#24029,#24030,#24031,#24032,#24033,#24034,#24035,#24036,#24037,
#24038,#24039,#24040,#24041,#24042),(#24043,#24044,#24045,#24046,#24047,
#24048,#24049,#24050,#24051,#24052,#24053,#24054,#24055,#24056,#24057,#24058,
#24059,#24060,#24061,#24062,#24063,#24064,#24065,#24066,#24067,#24068,#24069,
#24070,#24071,#24072,#24073,#24074,#24075,#24076,#24077,#24078,#24079,#24080,
#24081,#24082,#24083,#24084,#24085,#24086,#24087,#24088,#24089,#24090,#24091,
#24092,#24093,#24094,#24095,#24096,#24097,#24098,#24099,#24100,#24101,#24102,
#24103,#24104,#24105,#24106,#24107,#24108,#24109,#24110,#24111,#24112,#24113,
#24114,#24115,#24116,#24117,#24118,#24119,#24120,#24121,#24122,#24123,#24124,
#24125,#24126,#24127,#24128,#24129),(#24130,#24131,#24132,#24133,#24134,
#24135,#24136,#24137,#24138,#24139,#24140,#24141,#24142,#24143,#24144,#24145,
#24146,#24147,#24148,#24149,#24150,#24151,#24152,#24153,#24154,#24155,#24156,
#24157,#24158,#24159,#24160,#24161,#24162,#24163,#24164,#24165,#24166,#24167,
#24168,#24169,#24170,#24171,#24172,#24173,#24174,#24175,#24176,#24177,#24178,
#24179,#24180,#24181,#24182,#24183,#24184,#24185,#24186,#24187,#24188,#24189,
#24190,#24191,#24192,#24193,#24194,#24195,#24196,#24197,#24198,#24199,#24200,
#24201,#24202,#24203,#24204,#24205,#24206,#24207,#24208,#24209,#24210,#24211,
#24212,#24213,#24214,#24215,#24216)),.UNSPECIFIED.,.F.,.F.,.F.,(4,3,1,1,
3,4),(4,1,1,1,1,1,1,1,1,1,1,1,1,1,1,1,1,1,1,1,1,1,1,1,1,1,1,1,1,1,1,1,1,
1,1,1,1,1,1,1,1,1,1,1,1,1,1,1,1,1,1,1,1,1,1,1,1,1,1,1,1,1,1,1,1,1,1,1,1,
1,1,1,1,1,1,1,1,1,1,1,1,1,1,1,4),(-0.855237294951358,-0.838467936226788,
-0.119781133745207,0.359343401242513,0.838467936230234,0.85540498854205),
(32.7241439763348,33.2152755694897,33.7064071626446,34.1975387557996,34.6886703489545,
35.1798019421094,35.6709335352643,36.1620651284192,36.6531967215741,37.1443283147291,
37.635459907884,38.1265915010389,38.6177230941938,39.1088546873487,39.5999862805036,
40.0911178736586,40.5822494668135,41.0733810599684,41.5645126531233,42.0556442462782,
42.5467758394332,43.0379074325881,43.529039025743,44.0201706188979,44.5113022120528,
45.0024338052078,45.4935653983627,45.9846969915176,46.4758285846725,46.9669601778274,
47.4580917709823,47.9492233641373,48.4403549572922,48.9314865504471,49.422618143602,
49.9137497367569,50.4048813299118,50.8960129230668,51.3871445162217,51.8782761093766,
52.3694077025315,52.8605392956864,53.3516708888414,53.8428024819963,54.3339340751512,
54.8250656683061,55.316197261461,55.8073288546159,56.2984604477709,56.7895920409258,
57.2807236340807,57.7718552272356,58.2629868203905,58.7541184135455,59.2452500067004,
59.7363815998553,60.2275131930102,60.7186447861651,61.20977637932,61.700907972475,
62.1920395656299,62.6831711587848,63.1743027519397,63.6654343450946,64.1565659382495,
64.6476975314045,65.1388291245594,65.6299607177143,66.1210923108692,66.6122239040241,
67.1033554971791,67.594487090334,68.0856186834889,68.5767502766438,69.0678818697987,
69.5590134629536,70.0501450561086,70.5412766492635,71.0324082424184,71.5235398355733,
72.0146714287282,72.5058030218832,72.9969346150381,73.488066208193,73.9791978013479),
 .UNSPECIFIED.);
#155=B_SPLINE_SURFACE_WITH_KNOTS('',3,3,((#24296,#24297,#24298,#24299,#24300,
#24301,#24302,#24303,#24304,#24305,#24306,#24307,#24308,#24309,#24310,#24311,
#24312,#24313,#24314,#24315,#24316,#24317,#24318,#24319,#24320,#24321,#24322,
#24323,#24324,#24325,#24326,#24327,#24328,#24329,#24330,#24331,#24332,#24333,
#24334,#24335,#24336,#24337,#24338,#24339,#24340,#24341,#24342,#24343,#24344,
#24345,#24346,#24347,#24348,#24349,#24350,#24351,#24352,#24353,#24354,#24355,
#24356,#24357,#24358,#24359,#24360,#24361,#24362,#24363,#24364,#24365,#24366,
#24367,#24368,#24369,#24370,#24371,#24372,#24373,#24374,#24375,#24376,#24377,
#24378,#24379,#24380,#24381,#24382),(#24383,#24384,#24385,#24386,#24387,
#24388,#24389,#24390,#24391,#24392,#24393,#24394,#24395,#24396,#24397,#24398,
#24399,#24400,#24401,#24402,#24403,#24404,#24405,#24406,#24407,#24408,#24409,
#24410,#24411,#24412,#24413,#24414,#24415,#24416,#24417,#24418,#24419,#24420,
#24421,#24422,#24423,#24424,#24425,#24426,#24427,#24428,#24429,#24430,#24431,
#24432,#24433,#24434,#24435,#24436,#24437,#24438,#24439,#24440,#24441,#24442,
#24443,#24444,#24445,#24446,#24447,#24448,#24449,#24450,#24451,#24452,#24453,
#24454,#24455,#24456,#24457,#24458,#24459,#24460,#24461,#24462,#24463,#24464,
#24465,#24466,#24467,#24468,#24469),(#24470,#24471,#24472,#24473,#24474,
#24475,#24476,#24477,#24478,#24479,#24480,#24481,#24482,#24483,#24484,#24485,
#24486,#24487,#24488,#24489,#24490,#24491,#24492,#24493,#24494,#24495,#24496,
#24497,#24498,#24499,#24500,#24501,#24502,#24503,#24504,#24505,#24506,#24507,
#24508,#24509,#24510,#24511,#24512,#24513,#24514,#24515,#24516,#24517,#24518,
#24519,#24520,#24521,#24522,#24523,#24524,#24525,#24526,#24527,#24528,#24529,
#24530,#24531,#24532,#24533,#24534,#24535,#24536,#24537,#24538,#24539,#24540,
#24541,#24542,#24543,#24544,#24545,#24546,#24547,#24548,#24549,#24550,#24551,
#24552,#24553,#24554,#24555,#24556),(#24557,#24558,#24559,#24560,#24561,
#24562,#24563,#24564,#24565,#24566,#24567,#24568,#24569,#24570,#24571,#24572,
#24573,#24574,#24575,#24576,#24577,#24578,#24579,#24580,#24581,#24582,#24583,
#24584,#24585,#24586,#24587,#24588,#24589,#24590,#24591,#24592,#24593,#24594,
#24595,#24596,#24597,#24598,#24599,#24600,#24601,#24602,#24603,#24604,#24605,
#24606,#24607,#24608,#24609,#24610,#24611,#24612,#24613,#24614,#24615,#24616,
#24617,#24618,#24619,#24620,#24621,#24622,#24623,#24624,#24625,#24626,#24627,
#24628,#24629,#24630,#24631,#24632,#24633,#24634,#24635,#24636,#24637,#24638,
#24639,#24640,#24641,#24642,#24643),(#24644,#24645,#24646,#24647,#24648,
#24649,#24650,#24651,#24652,#24653,#24654,#24655,#24656,#24657,#24658,#24659,
#24660,#24661,#24662,#24663,#24664,#24665,#24666,#24667,#24668,#24669,#24670,
#24671,#24672,#24673,#24674,#24675,#24676,#24677,#24678,#24679,#24680,#24681,
#24682,#24683,#24684,#24685,#24686,#24687,#24688,#24689,#24690,#24691,#24692,
#24693,#24694,#24695,#24696,#24697,#24698,#24699,#24700,#24701,#24702,#24703,
#24704,#24705,#24706,#24707,#24708,#24709,#24710,#24711,#24712,#24713,#24714,
#24715,#24716,#24717,#24718,#24719,#24720,#24721,#24722,#24723,#24724,#24725,
#24726,#24727,#24728,#24729,#24730),(#24731,#24732,#24733,#24734,#24735,
#24736,#24737,#24738,#24739,#24740,#24741,#24742,#24743,#24744,#24745,#24746,
#24747,#24748,#24749,#24750,#24751,#24752,#24753,#24754,#24755,#24756,#24757,
#24758,#24759,#24760,#24761,#24762,#24763,#24764,#24765,#24766,#24767,#24768,
#24769,#24770,#24771,#24772,#24773,#24774,#24775,#24776,#24777,#24778,#24779,
#24780,#24781,#24782,#24783,#24784,#24785,#24786,#24787,#24788,#24789,#24790,
#24791,#24792,#24793,#24794,#24795,#24796,#24797,#24798,#24799,#24800,#24801,
#24802,#24803,#24804,#24805,#24806,#24807,#24808,#24809,#24810,#24811,#24812,
#24813,#24814,#24815,#24816,#24817),(#24818,#24819,#24820,#24821,#24822,
#24823,#24824,#24825,#24826,#24827,#24828,#24829,#24830,#24831,#24832,#24833,
#24834,#24835,#24836,#24837,#24838,#24839,#24840,#24841,#24842,#24843,#24844,
#24845,#24846,#24847,#24848,#24849,#24850,#24851,#24852,#24853,#24854,#24855,
#24856,#24857,#24858,#24859,#24860,#24861,#24862,#24863,#24864,#24865,#24866,
#24867,#24868,#24869,#24870,#24871,#24872,#24873,#24874,#24875,#24876,#24877,
#24878,#24879,#24880,#24881,#24882,#24883,#24884,#24885,#24886,#24887,#24888,
#24889,#24890,#24891,#24892,#24893,#24894,#24895,#24896,#24897,#24898,#24899,
#24900,#24901,#24902,#24903,#24904),(#24905,#24906,#24907,#24908,#24909,
#24910,#24911,#24912,#24913,#24914,#24915,#24916,#24917,#24918,#24919,#24920,
#24921,#24922,#24923,#24924,#24925,#24926,#24927,#24928,#24929,#24930,#24931,
#24932,#24933,#24934,#24935,#24936,#24937,#24938,#24939,#24940,#24941,#24942,
#24943,#24944,#24945,#24946,#24947,#24948,#24949,#24950,#24951,#24952,#24953,
#24954,#24955,#24956,#24957,#24958,#24959,#24960,#24961,#24962,#24963,#24964,
#24965,#24966,#24967,#24968,#24969,#24970,#24971,#24972,#24973,#24974,#24975,
#24976,#24977,#24978,#24979,#24980,#24981,#24982,#24983,#24984,#24985,#24986,
#24987,#24988,#24989,#24990,#24991),(#24992,#24993,#24994,#24995,#24996,
#24997,#24998,#24999,#25000,#25001,#25002,#25003,#25004,#25005,#25006,#25007,
#25008,#25009,#25010,#25011,#25012,#25013,#25014,#25015,#25016,#25017,#25018,
#25019,#25020,#25021,#25022,#25023,#25024,#25025,#25026,#25027,#25028,#25029,
#25030,#25031,#25032,#25033,#25034,#25035,#25036,#25037,#25038,#25039,#25040,
#25041,#25042,#25043,#25044,#25045,#25046,#25047,#25048,#25049,#25050,#25051,
#25052,#25053,#25054,#25055,#25056,#25057,#25058,#25059,#25060,#25061,#25062,
#25063,#25064,#25065,#25066,#25067,#25068,#25069,#25070,#25071,#25072,#25073,
#25074,#25075,#25076,#25077,#25078),(#25079,#25080,#25081,#25082,#25083,
#25084,#25085,#25086,#25087,#25088,#25089,#25090,#25091,#25092,#25093,#25094,
#25095,#25096,#25097,#25098,#25099,#25100,#25101,#25102,#25103,#25104,#25105,
#25106,#25107,#25108,#25109,#25110,#25111,#25112,#25113,#25114,#25115,#25116,
#25117,#25118,#25119,#25120,#25121,#25122,#25123,#25124,#25125,#25126,#25127,
#25128,#25129,#25130,#25131,#25132,#25133,#25134,#25135,#25136,#25137,#25138,
#25139,#25140,#25141,#25142,#25143,#25144,#25145,#25146,#25147,#25148,#25149,
#25150,#25151,#25152,#25153,#25154,#25155,#25156,#25157,#25158,#25159,#25160,
#25161,#25162,#25163,#25164,#25165),(#25166,#25167,#25168,#25169,#25170,
#25171,#25172,#25173,#25174,#25175,#25176,#25177,#25178,#25179,#25180,#25181,
#25182,#25183,#25184,#25185,#25186,#25187,#25188,#25189,#25190,#25191,#25192,
#25193,#25194,#25195,#25196,#25197,#25198,#25199,#25200,#25201,#25202,#25203,
#25204,#25205,#25206,#25207,#25208,#25209,#25210,#25211,#25212,#25213,#25214,
#25215,#25216,#25217,#25218,#25219,#25220,#25221,#25222,#25223,#25224,#25225,
#25226,#25227,#25228,#25229,#25230,#25231,#25232,#25233,#25234,#25235,#25236,
#25237,#25238,#25239,#25240,#25241,#25242,#25243,#25244,#25245,#25246,#25247,
#25248,#25249,#25250,#25251,#25252),(#25253,#25254,#25255,#25256,#25257,
#25258,#25259,#25260,#25261,#25262,#25263,#25264,#25265,#25266,#25267,#25268,
#25269,#25270,#25271,#25272,#25273,#25274,#25275,#25276,#25277,#25278,#25279,
#25280,#25281,#25282,#25283,#25284,#25285,#25286,#25287,#25288,#25289,#25290,
#25291,#25292,#25293,#25294,#25295,#25296,#25297,#25298,#25299,#25300,#25301,
#25302,#25303,#25304,#25305,#25306,#25307,#25308,#25309,#25310,#25311,#25312,
#25313,#25314,#25315,#25316,#25317,#25318,#25319,#25320,#25321,#25322,#25323,
#25324,#25325,#25326,#25327,#25328,#25329,#25330,#25331,#25332,#25333,#25334,
#25335,#25336,#25337,#25338,#25339)),.UNSPECIFIED.,.F.,.F.,.F.,(4,3,1,1,
3,4),(4,1,1,1,1,1,1,1,1,1,1,1,1,1,1,1,1,1,1,1,1,1,1,1,1,1,1,1,1,1,1,1,1,
1,1,1,1,1,1,1,1,1,1,1,1,1,1,1,1,1,1,1,1,1,1,1,1,1,1,1,1,1,1,1,1,1,1,1,1,
1,1,1,1,1,1,1,1,1,1,1,1,1,1,1,4),(-0.855237294951358,-0.838467936226788,
-0.119781133745207,0.359343401242513,0.838467936230234,0.85540498854205),
(32.7241439763348,33.2152755694897,33.7064071626446,34.1975387557996,34.6886703489545,
35.1798019421094,35.6709335352643,36.1620651284192,36.6531967215741,37.1443283147291,
37.635459907884,38.1265915010389,38.6177230941938,39.1088546873487,39.5999862805036,
40.0911178736586,40.5822494668135,41.0733810599684,41.5645126531233,42.0556442462782,
42.5467758394332,43.0379074325881,43.529039025743,44.0201706188979,44.5113022120528,
45.0024338052078,45.4935653983627,45.9846969915176,46.4758285846725,46.9669601778274,
47.4580917709823,47.9492233641373,48.4403549572922,48.9314865504471,49.422618143602,
49.9137497367569,50.4048813299118,50.8960129230668,51.3871445162217,51.8782761093766,
52.3694077025315,52.8605392956864,53.3516708888414,53.8428024819963,54.3339340751512,
54.8250656683061,55.316197261461,55.8073288546159,56.2984604477709,56.7895920409258,
57.2807236340807,57.7718552272356,58.2629868203905,58.7541184135455,59.2452500067004,
59.7363815998553,60.2275131930102,60.7186447861651,61.20977637932,61.700907972475,
62.1920395656299,62.6831711587848,63.1743027519397,63.6654343450946,64.1565659382495,
64.6476975314045,65.1388291245594,65.6299607177143,66.1210923108692,66.6122239040241,
67.1033554971791,67.594487090334,68.0856186834889,68.5767502766438,69.0678818697987,
69.5590134629536,70.0501450561086,70.5412766492635,71.0324082424184,71.5235398355733,
72.0146714287282,72.5058030218832,72.9969346150381,73.488066208193,73.9791978013479),
 .UNSPECIFIED.);
#156=B_SPLINE_SURFACE_WITH_KNOTS('',3,3,((#25346,#25347,#25348,#25349,#25350,
#25351,#25352,#25353,#25354,#25355,#25356,#25357,#25358,#25359,#25360,#25361,
#25362,#25363,#25364,#25365,#25366,#25367,#25368,#25369,#25370,#25371,#25372,
#25373,#25374,#25375,#25376,#25377,#25378,#25379,#25380,#25381,#25382,#25383,
#25384,#25385,#25386,#25387,#25388,#25389,#25390,#25391,#25392,#25393,#25394,
#25395,#25396,#25397,#25398,#25399,#25400,#25401,#25402,#25403,#25404,#25405,
#25406,#25407,#25408,#25409,#25410,#25411,#25412,#25413,#25414,#25415,#25416,
#25417,#25418,#25419,#25420,#25421,#25422,#25423,#25424,#25425,#25426,#25427,
#25428,#25429,#25430,#25431,#25432),(#25433,#25434,#25435,#25436,#25437,
#25438,#25439,#25440,#25441,#25442,#25443,#25444,#25445,#25446,#25447,#25448,
#25449,#25450,#25451,#25452,#25453,#25454,#25455,#25456,#25457,#25458,#25459,
#25460,#25461,#25462,#25463,#25464,#25465,#25466,#25467,#25468,#25469,#25470,
#25471,#25472,#25473,#25474,#25475,#25476,#25477,#25478,#25479,#25480,#25481,
#25482,#25483,#25484,#25485,#25486,#25487,#25488,#25489,#25490,#25491,#25492,
#25493,#25494,#25495,#25496,#25497,#25498,#25499,#25500,#25501,#25502,#25503,
#25504,#25505,#25506,#25507,#25508,#25509,#25510,#25511,#25512,#25513,#25514,
#25515,#25516,#25517,#25518,#25519),(#25520,#25521,#25522,#25523,#25524,
#25525,#25526,#25527,#25528,#25529,#25530,#25531,#25532,#25533,#25534,#25535,
#25536,#25537,#25538,#25539,#25540,#25541,#25542,#25543,#25544,#25545,#25546,
#25547,#25548,#25549,#25550,#25551,#25552,#25553,#25554,#25555,#25556,#25557,
#25558,#25559,#25560,#25561,#25562,#25563,#25564,#25565,#25566,#25567,#25568,
#25569,#25570,#25571,#25572,#25573,#25574,#25575,#25576,#25577,#25578,#25579,
#25580,#25581,#25582,#25583,#25584,#25585,#25586,#25587,#25588,#25589,#25590,
#25591,#25592,#25593,#25594,#25595,#25596,#25597,#25598,#25599,#25600,#25601,
#25602,#25603,#25604,#25605,#25606),(#25607,#25608,#25609,#25610,#25611,
#25612,#25613,#25614,#25615,#25616,#25617,#25618,#25619,#25620,#25621,#25622,
#25623,#25624,#25625,#25626,#25627,#25628,#25629,#25630,#25631,#25632,#25633,
#25634,#25635,#25636,#25637,#25638,#25639,#25640,#25641,#25642,#25643,#25644,
#25645,#25646,#25647,#25648,#25649,#25650,#25651,#25652,#25653,#25654,#25655,
#25656,#25657,#25658,#25659,#25660,#25661,#25662,#25663,#25664,#25665,#25666,
#25667,#25668,#25669,#25670,#25671,#25672,#25673,#25674,#25675,#25676,#25677,
#25678,#25679,#25680,#25681,#25682,#25683,#25684,#25685,#25686,#25687,#25688,
#25689,#25690,#25691,#25692,#25693),(#25694,#25695,#25696,#25697,#25698,
#25699,#25700,#25701,#25702,#25703,#25704,#25705,#25706,#25707,#25708,#25709,
#25710,#25711,#25712,#25713,#25714,#25715,#25716,#25717,#25718,#25719,#25720,
#25721,#25722,#25723,#25724,#25725,#25726,#25727,#25728,#25729,#25730,#25731,
#25732,#25733,#25734,#25735,#25736,#25737,#25738,#25739,#25740,#25741,#25742,
#25743,#25744,#25745,#25746,#25747,#25748,#25749,#25750,#25751,#25752,#25753,
#25754,#25755,#25756,#25757,#25758,#25759,#25760,#25761,#25762,#25763,#25764,
#25765,#25766,#25767,#25768,#25769,#25770,#25771,#25772,#25773,#25774,#25775,
#25776,#25777,#25778,#25779,#25780),(#25781,#25782,#25783,#25784,#25785,
#25786,#25787,#25788,#25789,#25790,#25791,#25792,#25793,#25794,#25795,#25796,
#25797,#25798,#25799,#25800,#25801,#25802,#25803,#25804,#25805,#25806,#25807,
#25808,#25809,#25810,#25811,#25812,#25813,#25814,#25815,#25816,#25817,#25818,
#25819,#25820,#25821,#25822,#25823,#25824,#25825,#25826,#25827,#25828,#25829,
#25830,#25831,#25832,#25833,#25834,#25835,#25836,#25837,#25838,#25839,#25840,
#25841,#25842,#25843,#25844,#25845,#25846,#25847,#25848,#25849,#25850,#25851,
#25852,#25853,#25854,#25855,#25856,#25857,#25858,#25859,#25860,#25861,#25862,
#25863,#25864,#25865,#25866,#25867),(#25868,#25869,#25870,#25871,#25872,
#25873,#25874,#25875,#25876,#25877,#25878,#25879,#25880,#25881,#25882,#25883,
#25884,#25885,#25886,#25887,#25888,#25889,#25890,#25891,#25892,#25893,#25894,
#25895,#25896,#25897,#25898,#25899,#25900,#25901,#25902,#25903,#25904,#25905,
#25906,#25907,#25908,#25909,#25910,#25911,#25912,#25913,#25914,#25915,#25916,
#25917,#25918,#25919,#25920,#25921,#25922,#25923,#25924,#25925,#25926,#25927,
#25928,#25929,#25930,#25931,#25932,#25933,#25934,#25935,#25936,#25937,#25938,
#25939,#25940,#25941,#25942,#25943,#25944,#25945,#25946,#25947,#25948,#25949,
#25950,#25951,#25952,#25953,#25954),(#25955,#25956,#25957,#25958,#25959,
#25960,#25961,#25962,#25963,#25964,#25965,#25966,#25967,#25968,#25969,#25970,
#25971,#25972,#25973,#25974,#25975,#25976,#25977,#25978,#25979,#25980,#25981,
#25982,#25983,#25984,#25985,#25986,#25987,#25988,#25989,#25990,#25991,#25992,
#25993,#25994,#25995,#25996,#25997,#25998,#25999,#26000,#26001,#26002,#26003,
#26004,#26005,#26006,#26007,#26008,#26009,#26010,#26011,#26012,#26013,#26014,
#26015,#26016,#26017,#26018,#26019,#26020,#26021,#26022,#26023,#26024,#26025,
#26026,#26027,#26028,#26029,#26030,#26031,#26032,#26033,#26034,#26035,#26036,
#26037,#26038,#26039,#26040,#26041),(#26042,#26043,#26044,#26045,#26046,
#26047,#26048,#26049,#26050,#26051,#26052,#26053,#26054,#26055,#26056,#26057,
#26058,#26059,#26060,#26061,#26062,#26063,#26064,#26065,#26066,#26067,#26068,
#26069,#26070,#26071,#26072,#26073,#26074,#26075,#26076,#26077,#26078,#26079,
#26080,#26081,#26082,#26083,#26084,#26085,#26086,#26087,#26088,#26089,#26090,
#26091,#26092,#26093,#26094,#26095,#26096,#26097,#26098,#26099,#26100,#26101,
#26102,#26103,#26104,#26105,#26106,#26107,#26108,#26109,#26110,#26111,#26112,
#26113,#26114,#26115,#26116,#26117,#26118,#26119,#26120,#26121,#26122,#26123,
#26124,#26125,#26126,#26127,#26128),(#26129,#26130,#26131,#26132,#26133,
#26134,#26135,#26136,#26137,#26138,#26139,#26140,#26141,#26142,#26143,#26144,
#26145,#26146,#26147,#26148,#26149,#26150,#26151,#26152,#26153,#26154,#26155,
#26156,#26157,#26158,#26159,#26160,#26161,#26162,#26163,#26164,#26165,#26166,
#26167,#26168,#26169,#26170,#26171,#26172,#26173,#26174,#26175,#26176,#26177,
#26178,#26179,#26180,#26181,#26182,#26183,#26184,#26185,#26186,#26187,#26188,
#26189,#26190,#26191,#26192,#26193,#26194,#26195,#26196,#26197,#26198,#26199,
#26200,#26201,#26202,#26203,#26204,#26205,#26206,#26207,#26208,#26209,#26210,
#26211,#26212,#26213,#26214,#26215),(#26216,#26217,#26218,#26219,#26220,
#26221,#26222,#26223,#26224,#26225,#26226,#26227,#26228,#26229,#26230,#26231,
#26232,#26233,#26234,#26235,#26236,#26237,#26238,#26239,#26240,#26241,#26242,
#26243,#26244,#26245,#26246,#26247,#26248,#26249,#26250,#26251,#26252,#26253,
#26254,#26255,#26256,#26257,#26258,#26259,#26260,#26261,#26262,#26263,#26264,
#26265,#26266,#26267,#26268,#26269,#26270,#26271,#26272,#26273,#26274,#26275,
#26276,#26277,#26278,#26279,#26280,#26281,#26282,#26283,#26284,#26285,#26286,
#26287,#26288,#26289,#26290,#26291,#26292,#26293,#26294,#26295,#26296,#26297,
#26298,#26299,#26300,#26301,#26302),(#26303,#26304,#26305,#26306,#26307,
#26308,#26309,#26310,#26311,#26312,#26313,#26314,#26315,#26316,#26317,#26318,
#26319,#26320,#26321,#26322,#26323,#26324,#26325,#26326,#26327,#26328,#26329,
#26330,#26331,#26332,#26333,#26334,#26335,#26336,#26337,#26338,#26339,#26340,
#26341,#26342,#26343,#26344,#26345,#26346,#26347,#26348,#26349,#26350,#26351,
#26352,#26353,#26354,#26355,#26356,#26357,#26358,#26359,#26360,#26361,#26362,
#26363,#26364,#26365,#26366,#26367,#26368,#26369,#26370,#26371,#26372,#26373,
#26374,#26375,#26376,#26377,#26378,#26379,#26380,#26381,#26382,#26383,#26384,
#26385,#26386,#26387,#26388,#26389)),.UNSPECIFIED.,.F.,.F.,.F.,(4,3,1,1,
3,4),(4,1,1,1,1,1,1,1,1,1,1,1,1,1,1,1,1,1,1,1,1,1,1,1,1,1,1,1,1,1,1,1,1,
1,1,1,1,1,1,1,1,1,1,1,1,1,1,1,1,1,1,1,1,1,1,1,1,1,1,1,1,1,1,1,1,1,1,1,1,
1,1,1,1,1,1,1,1,1,1,1,1,1,1,1,4),(-0.855237294951358,-0.838467936226788,
-0.119781133745207,0.359343401242513,0.838467936230234,0.85540498854205),
(32.7241439763348,33.2152755694897,33.7064071626446,34.1975387557996,34.6886703489545,
35.1798019421094,35.6709335352643,36.1620651284192,36.6531967215741,37.1443283147291,
37.635459907884,38.1265915010389,38.6177230941938,39.1088546873487,39.5999862805036,
40.0911178736586,40.5822494668135,41.0733810599684,41.5645126531233,42.0556442462782,
42.5467758394332,43.0379074325881,43.529039025743,44.0201706188979,44.5113022120528,
45.0024338052078,45.4935653983627,45.9846969915176,46.4758285846725,46.9669601778274,
47.4580917709823,47.9492233641373,48.4403549572922,48.9314865504471,49.422618143602,
49.9137497367569,50.4048813299118,50.8960129230668,51.3871445162217,51.8782761093766,
52.3694077025315,52.8605392956864,53.3516708888414,53.8428024819963,54.3339340751512,
54.8250656683061,55.316197261461,55.8073288546159,56.2984604477709,56.7895920409258,
57.2807236340807,57.7718552272356,58.2629868203905,58.7541184135455,59.2452500067004,
59.7363815998553,60.2275131930102,60.7186447861651,61.20977637932,61.700907972475,
62.1920395656299,62.6831711587848,63.1743027519397,63.6654343450946,64.1565659382495,
64.6476975314045,65.1388291245594,65.6299607177143,66.1210923108692,66.6122239040241,
67.1033554971791,67.594487090334,68.0856186834889,68.5767502766438,69.0678818697987,
69.5590134629536,70.0501450561086,70.5412766492635,71.0324082424184,71.5235398355733,
72.0146714287282,72.5058030218832,72.9969346150381,73.488066208193,73.9791978013479),
 .UNSPECIFIED.);
#157=B_SPLINE_SURFACE_WITH_KNOTS('',3,3,((#26416,#26417,#26418,#26419,#26420,
#26421,#26422,#26423,#26424,#26425,#26426,#26427,#26428,#26429,#26430,#26431,
#26432,#26433,#26434,#26435,#26436,#26437,#26438,#26439,#26440,#26441,#26442,
#26443,#26444,#26445,#26446,#26447,#26448,#26449,#26450,#26451,#26452,#26453,
#26454,#26455,#26456,#26457,#26458,#26459,#26460,#26461,#26462,#26463,#26464,
#26465,#26466,#26467,#26468,#26469,#26470,#26471,#26472,#26473,#26474,#26475,
#26476,#26477,#26478,#26479,#26480,#26481,#26482,#26483,#26484,#26485,#26486,
#26487,#26488,#26489,#26490,#26491,#26492,#26493,#26494,#26495,#26496,#26497,
#26498,#26499,#26500,#26501,#26502),(#26503,#26504,#26505,#26506,#26507,
#26508,#26509,#26510,#26511,#26512,#26513,#26514,#26515,#26516,#26517,#26518,
#26519,#26520,#26521,#26522,#26523,#26524,#26525,#26526,#26527,#26528,#26529,
#26530,#26531,#26532,#26533,#26534,#26535,#26536,#26537,#26538,#26539,#26540,
#26541,#26542,#26543,#26544,#26545,#26546,#26547,#26548,#26549,#26550,#26551,
#26552,#26553,#26554,#26555,#26556,#26557,#26558,#26559,#26560,#26561,#26562,
#26563,#26564,#26565,#26566,#26567,#26568,#26569,#26570,#26571,#26572,#26573,
#26574,#26575,#26576,#26577,#26578,#26579,#26580,#26581,#26582,#26583,#26584,
#26585,#26586,#26587,#26588,#26589),(#26590,#26591,#26592,#26593,#26594,
#26595,#26596,#26597,#26598,#26599,#26600,#26601,#26602,#26603,#26604,#26605,
#26606,#26607,#26608,#26609,#26610,#26611,#26612,#26613,#26614,#26615,#26616,
#26617,#26618,#26619,#26620,#26621,#26622,#26623,#26624,#26625,#26626,#26627,
#26628,#26629,#26630,#26631,#26632,#26633,#26634,#26635,#26636,#26637,#26638,
#26639,#26640,#26641,#26642,#26643,#26644,#26645,#26646,#26647,#26648,#26649,
#26650,#26651,#26652,#26653,#26654,#26655,#26656,#26657,#26658,#26659,#26660,
#26661,#26662,#26663,#26664,#26665,#26666,#26667,#26668,#26669,#26670,#26671,
#26672,#26673,#26674,#26675,#26676),(#26677,#26678,#26679,#26680,#26681,
#26682,#26683,#26684,#26685,#26686,#26687,#26688,#26689,#26690,#26691,#26692,
#26693,#26694,#26695,#26696,#26697,#26698,#26699,#26700,#26701,#26702,#26703,
#26704,#26705,#26706,#26707,#26708,#26709,#26710,#26711,#26712,#26713,#26714,
#26715,#26716,#26717,#26718,#26719,#26720,#26721,#26722,#26723,#26724,#26725,
#26726,#26727,#26728,#26729,#26730,#26731,#26732,#26733,#26734,#26735,#26736,
#26737,#26738,#26739,#26740,#26741,#26742,#26743,#26744,#26745,#26746,#26747,
#26748,#26749,#26750,#26751,#26752,#26753,#26754,#26755,#26756,#26757,#26758,
#26759,#26760,#26761,#26762,#26763),(#26764,#26765,#26766,#26767,#26768,
#26769,#26770,#26771,#26772,#26773,#26774,#26775,#26776,#26777,#26778,#26779,
#26780,#26781,#26782,#26783,#26784,#26785,#26786,#26787,#26788,#26789,#26790,
#26791,#26792,#26793,#26794,#26795,#26796,#26797,#26798,#26799,#26800,#26801,
#26802,#26803,#26804,#26805,#26806,#26807,#26808,#26809,#26810,#26811,#26812,
#26813,#26814,#26815,#26816,#26817,#26818,#26819,#26820,#26821,#26822,#26823,
#26824,#26825,#26826,#26827,#26828,#26829,#26830,#26831,#26832,#26833,#26834,
#26835,#26836,#26837,#26838,#26839,#26840,#26841,#26842,#26843,#26844,#26845,
#26846,#26847,#26848,#26849,#26850),(#26851,#26852,#26853,#26854,#26855,
#26856,#26857,#26858,#26859,#26860,#26861,#26862,#26863,#26864,#26865,#26866,
#26867,#26868,#26869,#26870,#26871,#26872,#26873,#26874,#26875,#26876,#26877,
#26878,#26879,#26880,#26881,#26882,#26883,#26884,#26885,#26886,#26887,#26888,
#26889,#26890,#26891,#26892,#26893,#26894,#26895,#26896,#26897,#26898,#26899,
#26900,#26901,#26902,#26903,#26904,#26905,#26906,#26907,#26908,#26909,#26910,
#26911,#26912,#26913,#26914,#26915,#26916,#26917,#26918,#26919,#26920,#26921,
#26922,#26923,#26924,#26925,#26926,#26927,#26928,#26929,#26930,#26931,#26932,
#26933,#26934,#26935,#26936,#26937),(#26938,#26939,#26940,#26941,#26942,
#26943,#26944,#26945,#26946,#26947,#26948,#26949,#26950,#26951,#26952,#26953,
#26954,#26955,#26956,#26957,#26958,#26959,#26960,#26961,#26962,#26963,#26964,
#26965,#26966,#26967,#26968,#26969,#26970,#26971,#26972,#26973,#26974,#26975,
#26976,#26977,#26978,#26979,#26980,#26981,#26982,#26983,#26984,#26985,#26986,
#26987,#26988,#26989,#26990,#26991,#26992,#26993,#26994,#26995,#26996,#26997,
#26998,#26999,#27000,#27001,#27002,#27003,#27004,#27005,#27006,#27007,#27008,
#27009,#27010,#27011,#27012,#27013,#27014,#27015,#27016,#27017,#27018,#27019,
#27020,#27021,#27022,#27023,#27024),(#27025,#27026,#27027,#27028,#27029,
#27030,#27031,#27032,#27033,#27034,#27035,#27036,#27037,#27038,#27039,#27040,
#27041,#27042,#27043,#27044,#27045,#27046,#27047,#27048,#27049,#27050,#27051,
#27052,#27053,#27054,#27055,#27056,#27057,#27058,#27059,#27060,#27061,#27062,
#27063,#27064,#27065,#27066,#27067,#27068,#27069,#27070,#27071,#27072,#27073,
#27074,#27075,#27076,#27077,#27078,#27079,#27080,#27081,#27082,#27083,#27084,
#27085,#27086,#27087,#27088,#27089,#27090,#27091,#27092,#27093,#27094,#27095,
#27096,#27097,#27098,#27099,#27100,#27101,#27102,#27103,#27104,#27105,#27106,
#27107,#27108,#27109,#27110,#27111),(#27112,#27113,#27114,#27115,#27116,
#27117,#27118,#27119,#27120,#27121,#27122,#27123,#27124,#27125,#27126,#27127,
#27128,#27129,#27130,#27131,#27132,#27133,#27134,#27135,#27136,#27137,#27138,
#27139,#27140,#27141,#27142,#27143,#27144,#27145,#27146,#27147,#27148,#27149,
#27150,#27151,#27152,#27153,#27154,#27155,#27156,#27157,#27158,#27159,#27160,
#27161,#27162,#27163,#27164,#27165,#27166,#27167,#27168,#27169,#27170,#27171,
#27172,#27173,#27174,#27175,#27176,#27177,#27178,#27179,#27180,#27181,#27182,
#27183,#27184,#27185,#27186,#27187,#27188,#27189,#27190,#27191,#27192,#27193,
#27194,#27195,#27196,#27197,#27198),(#27199,#27200,#27201,#27202,#27203,
#27204,#27205,#27206,#27207,#27208,#27209,#27210,#27211,#27212,#27213,#27214,
#27215,#27216,#27217,#27218,#27219,#27220,#27221,#27222,#27223,#27224,#27225,
#27226,#27227,#27228,#27229,#27230,#27231,#27232,#27233,#27234,#27235,#27236,
#27237,#27238,#27239,#27240,#27241,#27242,#27243,#27244,#27245,#27246,#27247,
#27248,#27249,#27250,#27251,#27252,#27253,#27254,#27255,#27256,#27257,#27258,
#27259,#27260,#27261,#27262,#27263,#27264,#27265,#27266,#27267,#27268,#27269,
#27270,#27271,#27272,#27273,#27274,#27275,#27276,#27277,#27278,#27279,#27280,
#27281,#27282,#27283,#27284,#27285),(#27286,#27287,#27288,#27289,#27290,
#27291,#27292,#27293,#27294,#27295,#27296,#27297,#27298,#27299,#27300,#27301,
#27302,#27303,#27304,#27305,#27306,#27307,#27308,#27309,#27310,#27311,#27312,
#27313,#27314,#27315,#27316,#27317,#27318,#27319,#27320,#27321,#27322,#27323,
#27324,#27325,#27326,#27327,#27328,#27329,#27330,#27331,#27332,#27333,#27334,
#27335,#27336,#27337,#27338,#27339,#27340,#27341,#27342,#27343,#27344,#27345,
#27346,#27347,#27348,#27349,#27350,#27351,#27352,#27353,#27354,#27355,#27356,
#27357,#27358,#27359,#27360,#27361,#27362,#27363,#27364,#27365,#27366,#27367,
#27368,#27369,#27370,#27371,#27372),(#27373,#27374,#27375,#27376,#27377,
#27378,#27379,#27380,#27381,#27382,#27383,#27384,#27385,#27386,#27387,#27388,
#27389,#27390,#27391,#27392,#27393,#27394,#27395,#27396,#27397,#27398,#27399,
#27400,#27401,#27402,#27403,#27404,#27405,#27406,#27407,#27408,#27409,#27410,
#27411,#27412,#27413,#27414,#27415,#27416,#27417,#27418,#27419,#27420,#27421,
#27422,#27423,#27424,#27425,#27426,#27427,#27428,#27429,#27430,#27431,#27432,
#27433,#27434,#27435,#27436,#27437,#27438,#27439,#27440,#27441,#27442,#27443,
#27444,#27445,#27446,#27447,#27448,#27449,#27450,#27451,#27452,#27453,#27454,
#27455,#27456,#27457,#27458,#27459)),.UNSPECIFIED.,.F.,.F.,.F.,(4,3,1,1,
3,4),(4,1,1,1,1,1,1,1,1,1,1,1,1,1,1,1,1,1,1,1,1,1,1,1,1,1,1,1,1,1,1,1,1,
1,1,1,1,1,1,1,1,1,1,1,1,1,1,1,1,1,1,1,1,1,1,1,1,1,1,1,1,1,1,1,1,1,1,1,1,
1,1,1,1,1,1,1,1,1,1,1,1,1,1,1,4),(-0.855237294951358,-0.838467936226788,
-0.119781133745207,0.359343401242513,0.838467936230234,0.85540498854205),
(32.7241439763348,33.2152755694897,33.7064071626446,34.1975387557996,34.6886703489545,
35.1798019421094,35.6709335352643,36.1620651284192,36.6531967215741,37.1443283147291,
37.635459907884,38.1265915010389,38.6177230941938,39.1088546873487,39.5999862805036,
40.0911178736586,40.5822494668135,41.0733810599684,41.5645126531233,42.0556442462782,
42.5467758394332,43.0379074325881,43.529039025743,44.0201706188979,44.5113022120528,
45.0024338052078,45.4935653983627,45.9846969915176,46.4758285846725,46.9669601778274,
47.4580917709823,47.9492233641373,48.4403549572922,48.9314865504471,49.422618143602,
49.9137497367569,50.4048813299118,50.8960129230668,51.3871445162217,51.8782761093766,
52.3694077025315,52.8605392956864,53.3516708888414,53.8428024819963,54.3339340751512,
54.8250656683061,55.316197261461,55.8073288546159,56.2984604477709,56.7895920409258,
57.2807236340807,57.7718552272356,58.2629868203905,58.7541184135455,59.2452500067004,
59.7363815998553,60.2275131930102,60.7186447861651,61.20977637932,61.700907972475,
62.1920395656299,62.6831711587848,63.1743027519397,63.6654343450946,64.1565659382495,
64.6476975314045,65.1388291245594,65.6299607177143,66.1210923108692,66.6122239040241,
67.1033554971791,67.594487090334,68.0856186834889,68.5767502766438,69.0678818697987,
69.5590134629536,70.0501450561086,70.5412766492635,71.0324082424184,71.5235398355733,
72.0146714287282,72.5058030218832,72.9969346150381,73.488066208193,73.9791978013479),
 .UNSPECIFIED.);
#158=B_SPLINE_SURFACE_WITH_KNOTS('',3,3,((#27498,#27499,#27500,#27501,#27502,
#27503,#27504,#27505,#27506,#27507,#27508,#27509,#27510,#27511,#27512,#27513,
#27514,#27515,#27516,#27517,#27518,#27519,#27520,#27521,#27522,#27523,#27524,
#27525,#27526,#27527,#27528,#27529,#27530,#27531,#27532,#27533,#27534,#27535,
#27536,#27537,#27538,#27539,#27540,#27541,#27542,#27543,#27544,#27545,#27546,
#27547,#27548,#27549,#27550,#27551,#27552,#27553,#27554,#27555,#27556,#27557,
#27558,#27559,#27560,#27561,#27562,#27563,#27564,#27565,#27566,#27567,#27568,
#27569,#27570,#27571,#27572,#27573,#27574,#27575,#27576,#27577,#27578,#27579,
#27580,#27581,#27582,#27583,#27584),(#27585,#27586,#27587,#27588,#27589,
#27590,#27591,#27592,#27593,#27594,#27595,#27596,#27597,#27598,#27599,#27600,
#27601,#27602,#27603,#27604,#27605,#27606,#27607,#27608,#27609,#27610,#27611,
#27612,#27613,#27614,#27615,#27616,#27617,#27618,#27619,#27620,#27621,#27622,
#27623,#27624,#27625,#27626,#27627,#27628,#27629,#27630,#27631,#27632,#27633,
#27634,#27635,#27636,#27637,#27638,#27639,#27640,#27641,#27642,#27643,#27644,
#27645,#27646,#27647,#27648,#27649,#27650,#27651,#27652,#27653,#27654,#27655,
#27656,#27657,#27658,#27659,#27660,#27661,#27662,#27663,#27664,#27665,#27666,
#27667,#27668,#27669,#27670,#27671),(#27672,#27673,#27674,#27675,#27676,
#27677,#27678,#27679,#27680,#27681,#27682,#27683,#27684,#27685,#27686,#27687,
#27688,#27689,#27690,#27691,#27692,#27693,#27694,#27695,#27696,#27697,#27698,
#27699,#27700,#27701,#27702,#27703,#27704,#27705,#27706,#27707,#27708,#27709,
#27710,#27711,#27712,#27713,#27714,#27715,#27716,#27717,#27718,#27719,#27720,
#27721,#27722,#27723,#27724,#27725,#27726,#27727,#27728,#27729,#27730,#27731,
#27732,#27733,#27734,#27735,#27736,#27737,#27738,#27739,#27740,#27741,#27742,
#27743,#27744,#27745,#27746,#27747,#27748,#27749,#27750,#27751,#27752,#27753,
#27754,#27755,#27756,#27757,#27758),(#27759,#27760,#27761,#27762,#27763,
#27764,#27765,#27766,#27767,#27768,#27769,#27770,#27771,#27772,#27773,#27774,
#27775,#27776,#27777,#27778,#27779,#27780,#27781,#27782,#27783,#27784,#27785,
#27786,#27787,#27788,#27789,#27790,#27791,#27792,#27793,#27794,#27795,#27796,
#27797,#27798,#27799,#27800,#27801,#27802,#27803,#27804,#27805,#27806,#27807,
#27808,#27809,#27810,#27811,#27812,#27813,#27814,#27815,#27816,#27817,#27818,
#27819,#27820,#27821,#27822,#27823,#27824,#27825,#27826,#27827,#27828,#27829,
#27830,#27831,#27832,#27833,#27834,#27835,#27836,#27837,#27838,#27839,#27840,
#27841,#27842,#27843,#27844,#27845),(#27846,#27847,#27848,#27849,#27850,
#27851,#27852,#27853,#27854,#27855,#27856,#27857,#27858,#27859,#27860,#27861,
#27862,#27863,#27864,#27865,#27866,#27867,#27868,#27869,#27870,#27871,#27872,
#27873,#27874,#27875,#27876,#27877,#27878,#27879,#27880,#27881,#27882,#27883,
#27884,#27885,#27886,#27887,#27888,#27889,#27890,#27891,#27892,#27893,#27894,
#27895,#27896,#27897,#27898,#27899,#27900,#27901,#27902,#27903,#27904,#27905,
#27906,#27907,#27908,#27909,#27910,#27911,#27912,#27913,#27914,#27915,#27916,
#27917,#27918,#27919,#27920,#27921,#27922,#27923,#27924,#27925,#27926,#27927,
#27928,#27929,#27930,#27931,#27932),(#27933,#27934,#27935,#27936,#27937,
#27938,#27939,#27940,#27941,#27942,#27943,#27944,#27945,#27946,#27947,#27948,
#27949,#27950,#27951,#27952,#27953,#27954,#27955,#27956,#27957,#27958,#27959,
#27960,#27961,#27962,#27963,#27964,#27965,#27966,#27967,#27968,#27969,#27970,
#27971,#27972,#27973,#27974,#27975,#27976,#27977,#27978,#27979,#27980,#27981,
#27982,#27983,#27984,#27985,#27986,#27987,#27988,#27989,#27990,#27991,#27992,
#27993,#27994,#27995,#27996,#27997,#27998,#27999,#28000,#28001,#28002,#28003,
#28004,#28005,#28006,#28007,#28008,#28009,#28010,#28011,#28012,#28013,#28014,
#28015,#28016,#28017,#28018,#28019),(#28020,#28021,#28022,#28023,#28024,
#28025,#28026,#28027,#28028,#28029,#28030,#28031,#28032,#28033,#28034,#28035,
#28036,#28037,#28038,#28039,#28040,#28041,#28042,#28043,#28044,#28045,#28046,
#28047,#28048,#28049,#28050,#28051,#28052,#28053,#28054,#28055,#28056,#28057,
#28058,#28059,#28060,#28061,#28062,#28063,#28064,#28065,#28066,#28067,#28068,
#28069,#28070,#28071,#28072,#28073,#28074,#28075,#28076,#28077,#28078,#28079,
#28080,#28081,#28082,#28083,#28084,#28085,#28086,#28087,#28088,#28089,#28090,
#28091,#28092,#28093,#28094,#28095,#28096,#28097,#28098,#28099,#28100,#28101,
#28102,#28103,#28104,#28105,#28106),(#28107,#28108,#28109,#28110,#28111,
#28112,#28113,#28114,#28115,#28116,#28117,#28118,#28119,#28120,#28121,#28122,
#28123,#28124,#28125,#28126,#28127,#28128,#28129,#28130,#28131,#28132,#28133,
#28134,#28135,#28136,#28137,#28138,#28139,#28140,#28141,#28142,#28143,#28144,
#28145,#28146,#28147,#28148,#28149,#28150,#28151,#28152,#28153,#28154,#28155,
#28156,#28157,#28158,#28159,#28160,#28161,#28162,#28163,#28164,#28165,#28166,
#28167,#28168,#28169,#28170,#28171,#28172,#28173,#28174,#28175,#28176,#28177,
#28178,#28179,#28180,#28181,#28182,#28183,#28184,#28185,#28186,#28187,#28188,
#28189,#28190,#28191,#28192,#28193),(#28194,#28195,#28196,#28197,#28198,
#28199,#28200,#28201,#28202,#28203,#28204,#28205,#28206,#28207,#28208,#28209,
#28210,#28211,#28212,#28213,#28214,#28215,#28216,#28217,#28218,#28219,#28220,
#28221,#28222,#28223,#28224,#28225,#28226,#28227,#28228,#28229,#28230,#28231,
#28232,#28233,#28234,#28235,#28236,#28237,#28238,#28239,#28240,#28241,#28242,
#28243,#28244,#28245,#28246,#28247,#28248,#28249,#28250,#28251,#28252,#28253,
#28254,#28255,#28256,#28257,#28258,#28259,#28260,#28261,#28262,#28263,#28264,
#28265,#28266,#28267,#28268,#28269,#28270,#28271,#28272,#28273,#28274,#28275,
#28276,#28277,#28278,#28279,#28280),(#28281,#28282,#28283,#28284,#28285,
#28286,#28287,#28288,#28289,#28290,#28291,#28292,#28293,#28294,#28295,#28296,
#28297,#28298,#28299,#28300,#28301,#28302,#28303,#28304,#28305,#28306,#28307,
#28308,#28309,#28310,#28311,#28312,#28313,#28314,#28315,#28316,#28317,#28318,
#28319,#28320,#28321,#28322,#28323,#28324,#28325,#28326,#28327,#28328,#28329,
#28330,#28331,#28332,#28333,#28334,#28335,#28336,#28337,#28338,#28339,#28340,
#28341,#28342,#28343,#28344,#28345,#28346,#28347,#28348,#28349,#28350,#28351,
#28352,#28353,#28354,#28355,#28356,#28357,#28358,#28359,#28360,#28361,#28362,
#28363,#28364,#28365,#28366,#28367),(#28368,#28369,#28370,#28371,#28372,
#28373,#28374,#28375,#28376,#28377,#28378,#28379,#28380,#28381,#28382,#28383,
#28384,#28385,#28386,#28387,#28388,#28389,#28390,#28391,#28392,#28393,#28394,
#28395,#28396,#28397,#28398,#28399,#28400,#28401,#28402,#28403,#28404,#28405,
#28406,#28407,#28408,#28409,#28410,#28411,#28412,#28413,#28414,#28415,#28416,
#28417,#28418,#28419,#28420,#28421,#28422,#28423,#28424,#28425,#28426,#28427,
#28428,#28429,#28430,#28431,#28432,#28433,#28434,#28435,#28436,#28437,#28438,
#28439,#28440,#28441,#28442,#28443,#28444,#28445,#28446,#28447,#28448,#28449,
#28450,#28451,#28452,#28453,#28454),(#28455,#28456,#28457,#28458,#28459,
#28460,#28461,#28462,#28463,#28464,#28465,#28466,#28467,#28468,#28469,#28470,
#28471,#28472,#28473,#28474,#28475,#28476,#28477,#28478,#28479,#28480,#28481,
#28482,#28483,#28484,#28485,#28486,#28487,#28488,#28489,#28490,#28491,#28492,
#28493,#28494,#28495,#28496,#28497,#28498,#28499,#28500,#28501,#28502,#28503,
#28504,#28505,#28506,#28507,#28508,#28509,#28510,#28511,#28512,#28513,#28514,
#28515,#28516,#28517,#28518,#28519,#28520,#28521,#28522,#28523,#28524,#28525,
#28526,#28527,#28528,#28529,#28530,#28531,#28532,#28533,#28534,#28535,#28536,
#28537,#28538,#28539,#28540,#28541)),.UNSPECIFIED.,.F.,.F.,.F.,(4,3,1,1,
3,4),(4,1,1,1,1,1,1,1,1,1,1,1,1,1,1,1,1,1,1,1,1,1,1,1,1,1,1,1,1,1,1,1,1,
1,1,1,1,1,1,1,1,1,1,1,1,1,1,1,1,1,1,1,1,1,1,1,1,1,1,1,1,1,1,1,1,1,1,1,1,
1,1,1,1,1,1,1,1,1,1,1,1,1,1,1,4),(-0.855237294951358,-0.838467936226788,
-0.119781133745207,0.359343401242513,0.838467936230234,0.85540498854205),
(32.7241439763348,33.2152755694897,33.7064071626446,34.1975387557996,34.6886703489545,
35.1798019421094,35.6709335352643,36.1620651284192,36.6531967215741,37.1443283147291,
37.635459907884,38.1265915010389,38.6177230941938,39.1088546873487,39.5999862805036,
40.0911178736586,40.5822494668135,41.0733810599684,41.5645126531233,42.0556442462782,
42.5467758394332,43.0379074325881,43.529039025743,44.0201706188979,44.5113022120528,
45.0024338052078,45.4935653983627,45.9846969915176,46.4758285846725,46.9669601778274,
47.4580917709823,47.9492233641373,48.4403549572922,48.9314865504471,49.422618143602,
49.9137497367569,50.4048813299118,50.8960129230668,51.3871445162217,51.8782761093766,
52.3694077025315,52.8605392956864,53.3516708888414,53.8428024819963,54.3339340751512,
54.8250656683061,55.316197261461,55.8073288546159,56.2984604477709,56.7895920409258,
57.2807236340807,57.7718552272356,58.2629868203905,58.7541184135455,59.2452500067004,
59.7363815998553,60.2275131930102,60.7186447861651,61.20977637932,61.700907972475,
62.1920395656299,62.6831711587848,63.1743027519397,63.6654343450946,64.1565659382495,
64.6476975314045,65.1388291245594,65.6299607177143,66.1210923108692,66.6122239040241,
67.1033554971791,67.594487090334,68.0856186834889,68.5767502766438,69.0678818697987,
69.5590134629536,70.0501450561086,70.5412766492635,71.0324082424184,71.5235398355733,
72.0146714287282,72.5058030218832,72.9969346150381,73.488066208193,73.9791978013479),
 .UNSPECIFIED.);
#159=B_SPLINE_SURFACE_WITH_KNOTS('',3,3,((#29023,#29024,#29025,#29026,#29027,
#29028,#29029,#29030,#29031,#29032,#29033,#29034,#29035,#29036,#29037,#29038,
#29039,#29040,#29041,#29042,#29043,#29044,#29045,#29046,#29047,#29048,#29049,
#29050,#29051,#29052,#29053,#29054,#29055,#29056,#29057,#29058,#29059,#29060,
#29061,#29062,#29063,#29064,#29065,#29066,#29067,#29068,#29069,#29070,#29071,
#29072,#29073,#29074,#29075,#29076,#29077,#29078,#29079,#29080,#29081,#29082,
#29083,#29084,#29085,#29086,#29087,#29088,#29089,#29090,#29091,#29092,#29093,
#29094,#29095,#29096,#29097,#29098,#29099,#29100,#29101,#29102,#29103,#29104,
#29105,#29106,#29107,#29108,#29109),(#29110,#29111,#29112,#29113,#29114,
#29115,#29116,#29117,#29118,#29119,#29120,#29121,#29122,#29123,#29124,#29125,
#29126,#29127,#29128,#29129,#29130,#29131,#29132,#29133,#29134,#29135,#29136,
#29137,#29138,#29139,#29140,#29141,#29142,#29143,#29144,#29145,#29146,#29147,
#29148,#29149,#29150,#29151,#29152,#29153,#29154,#29155,#29156,#29157,#29158,
#29159,#29160,#29161,#29162,#29163,#29164,#29165,#29166,#29167,#29168,#29169,
#29170,#29171,#29172,#29173,#29174,#29175,#29176,#29177,#29178,#29179,#29180,
#29181,#29182,#29183,#29184,#29185,#29186,#29187,#29188,#29189,#29190,#29191,
#29192,#29193,#29194,#29195,#29196),(#29197,#29198,#29199,#29200,#29201,
#29202,#29203,#29204,#29205,#29206,#29207,#29208,#29209,#29210,#29211,#29212,
#29213,#29214,#29215,#29216,#29217,#29218,#29219,#29220,#29221,#29222,#29223,
#29224,#29225,#29226,#29227,#29228,#29229,#29230,#29231,#29232,#29233,#29234,
#29235,#29236,#29237,#29238,#29239,#29240,#29241,#29242,#29243,#29244,#29245,
#29246,#29247,#29248,#29249,#29250,#29251,#29252,#29253,#29254,#29255,#29256,
#29257,#29258,#29259,#29260,#29261,#29262,#29263,#29264,#29265,#29266,#29267,
#29268,#29269,#29270,#29271,#29272,#29273,#29274,#29275,#29276,#29277,#29278,
#29279,#29280,#29281,#29282,#29283),(#29284,#29285,#29286,#29287,#29288,
#29289,#29290,#29291,#29292,#29293,#29294,#29295,#29296,#29297,#29298,#29299,
#29300,#29301,#29302,#29303,#29304,#29305,#29306,#29307,#29308,#29309,#29310,
#29311,#29312,#29313,#29314,#29315,#29316,#29317,#29318,#29319,#29320,#29321,
#29322,#29323,#29324,#29325,#29326,#29327,#29328,#29329,#29330,#29331,#29332,
#29333,#29334,#29335,#29336,#29337,#29338,#29339,#29340,#29341,#29342,#29343,
#29344,#29345,#29346,#29347,#29348,#29349,#29350,#29351,#29352,#29353,#29354,
#29355,#29356,#29357,#29358,#29359,#29360,#29361,#29362,#29363,#29364,#29365,
#29366,#29367,#29368,#29369,#29370),(#29371,#29372,#29373,#29374,#29375,
#29376,#29377,#29378,#29379,#29380,#29381,#29382,#29383,#29384,#29385,#29386,
#29387,#29388,#29389,#29390,#29391,#29392,#29393,#29394,#29395,#29396,#29397,
#29398,#29399,#29400,#29401,#29402,#29403,#29404,#29405,#29406,#29407,#29408,
#29409,#29410,#29411,#29412,#29413,#29414,#29415,#29416,#29417,#29418,#29419,
#29420,#29421,#29422,#29423,#29424,#29425,#29426,#29427,#29428,#29429,#29430,
#29431,#29432,#29433,#29434,#29435,#29436,#29437,#29438,#29439,#29440,#29441,
#29442,#29443,#29444,#29445,#29446,#29447,#29448,#29449,#29450,#29451,#29452,
#29453,#29454,#29455,#29456,#29457),(#29458,#29459,#29460,#29461,#29462,
#29463,#29464,#29465,#29466,#29467,#29468,#29469,#29470,#29471,#29472,#29473,
#29474,#29475,#29476,#29477,#29478,#29479,#29480,#29481,#29482,#29483,#29484,
#29485,#29486,#29487,#29488,#29489,#29490,#29491,#29492,#29493,#29494,#29495,
#29496,#29497,#29498,#29499,#29500,#29501,#29502,#29503,#29504,#29505,#29506,
#29507,#29508,#29509,#29510,#29511,#29512,#29513,#29514,#29515,#29516,#29517,
#29518,#29519,#29520,#29521,#29522,#29523,#29524,#29525,#29526,#29527,#29528,
#29529,#29530,#29531,#29532,#29533,#29534,#29535,#29536,#29537,#29538,#29539,
#29540,#29541,#29542,#29543,#29544),(#29545,#29546,#29547,#29548,#29549,
#29550,#29551,#29552,#29553,#29554,#29555,#29556,#29557,#29558,#29559,#29560,
#29561,#29562,#29563,#29564,#29565,#29566,#29567,#29568,#29569,#29570,#29571,
#29572,#29573,#29574,#29575,#29576,#29577,#29578,#29579,#29580,#29581,#29582,
#29583,#29584,#29585,#29586,#29587,#29588,#29589,#29590,#29591,#29592,#29593,
#29594,#29595,#29596,#29597,#29598,#29599,#29600,#29601,#29602,#29603,#29604,
#29605,#29606,#29607,#29608,#29609,#29610,#29611,#29612,#29613,#29614,#29615,
#29616,#29617,#29618,#29619,#29620,#29621,#29622,#29623,#29624,#29625,#29626,
#29627,#29628,#29629,#29630,#29631),(#29632,#29633,#29634,#29635,#29636,
#29637,#29638,#29639,#29640,#29641,#29642,#29643,#29644,#29645,#29646,#29647,
#29648,#29649,#29650,#29651,#29652,#29653,#29654,#29655,#29656,#29657,#29658,
#29659,#29660,#29661,#29662,#29663,#29664,#29665,#29666,#29667,#29668,#29669,
#29670,#29671,#29672,#29673,#29674,#29675,#29676,#29677,#29678,#29679,#29680,
#29681,#29682,#29683,#29684,#29685,#29686,#29687,#29688,#29689,#29690,#29691,
#29692,#29693,#29694,#29695,#29696,#29697,#29698,#29699,#29700,#29701,#29702,
#29703,#29704,#29705,#29706,#29707,#29708,#29709,#29710,#29711,#29712,#29713,
#29714,#29715,#29716,#29717,#29718),(#29719,#29720,#29721,#29722,#29723,
#29724,#29725,#29726,#29727,#29728,#29729,#29730,#29731,#29732,#29733,#29734,
#29735,#29736,#29737,#29738,#29739,#29740,#29741,#29742,#29743,#29744,#29745,
#29746,#29747,#29748,#29749,#29750,#29751,#29752,#29753,#29754,#29755,#29756,
#29757,#29758,#29759,#29760,#29761,#29762,#29763,#29764,#29765,#29766,#29767,
#29768,#29769,#29770,#29771,#29772,#29773,#29774,#29775,#29776,#29777,#29778,
#29779,#29780,#29781,#29782,#29783,#29784,#29785,#29786,#29787,#29788,#29789,
#29790,#29791,#29792,#29793,#29794,#29795,#29796,#29797,#29798,#29799,#29800,
#29801,#29802,#29803,#29804,#29805),(#29806,#29807,#29808,#29809,#29810,
#29811,#29812,#29813,#29814,#29815,#29816,#29817,#29818,#29819,#29820,#29821,
#29822,#29823,#29824,#29825,#29826,#29827,#29828,#29829,#29830,#29831,#29832,
#29833,#29834,#29835,#29836,#29837,#29838,#29839,#29840,#29841,#29842,#29843,
#29844,#29845,#29846,#29847,#29848,#29849,#29850,#29851,#29852,#29853,#29854,
#29855,#29856,#29857,#29858,#29859,#29860,#29861,#29862,#29863,#29864,#29865,
#29866,#29867,#29868,#29869,#29870,#29871,#29872,#29873,#29874,#29875,#29876,
#29877,#29878,#29879,#29880,#29881,#29882,#29883,#29884,#29885,#29886,#29887,
#29888,#29889,#29890,#29891,#29892),(#29893,#29894,#29895,#29896,#29897,
#29898,#29899,#29900,#29901,#29902,#29903,#29904,#29905,#29906,#29907,#29908,
#29909,#29910,#29911,#29912,#29913,#29914,#29915,#29916,#29917,#29918,#29919,
#29920,#29921,#29922,#29923,#29924,#29925,#29926,#29927,#29928,#29929,#29930,
#29931,#29932,#29933,#29934,#29935,#29936,#29937,#29938,#29939,#29940,#29941,
#29942,#29943,#29944,#29945,#29946,#29947,#29948,#29949,#29950,#29951,#29952,
#29953,#29954,#29955,#29956,#29957,#29958,#29959,#29960,#29961,#29962,#29963,
#29964,#29965,#29966,#29967,#29968,#29969,#29970,#29971,#29972,#29973,#29974,
#29975,#29976,#29977,#29978,#29979),(#29980,#29981,#29982,#29983,#29984,
#29985,#29986,#29987,#29988,#29989,#29990,#29991,#29992,#29993,#29994,#29995,
#29996,#29997,#29998,#29999,#30000,#30001,#30002,#30003,#30004,#30005,#30006,
#30007,#30008,#30009,#30010,#30011,#30012,#30013,#30014,#30015,#30016,#30017,
#30018,#30019,#30020,#30021,#30022,#30023,#30024,#30025,#30026,#30027,#30028,
#30029,#30030,#30031,#30032,#30033,#30034,#30035,#30036,#30037,#30038,#30039,
#30040,#30041,#30042,#30043,#30044,#30045,#30046,#30047,#30048,#30049,#30050,
#30051,#30052,#30053,#30054,#30055,#30056,#30057,#30058,#30059,#30060,#30061,
#30062,#30063,#30064,#30065,#30066)),.UNSPECIFIED.,.F.,.F.,.F.,(4,3,1,1,
3,4),(4,1,1,1,1,1,1,1,1,1,1,1,1,1,1,1,1,1,1,1,1,1,1,1,1,1,1,1,1,1,1,1,1,
1,1,1,1,1,1,1,1,1,1,1,1,1,1,1,1,1,1,1,1,1,1,1,1,1,1,1,1,1,1,1,1,1,1,1,1,
1,1,1,1,1,1,1,1,1,1,1,1,1,1,1,4),(-0.855237294951358,-0.838467936226788,
-0.119781133745207,0.359343401242513,0.838467936230234,0.85540498854205),
(32.7241439763348,33.2152755694897,33.7064071626446,34.1975387557996,34.6886703489545,
35.1798019421094,35.6709335352643,36.1620651284192,36.6531967215741,37.1443283147291,
37.635459907884,38.1265915010389,38.6177230941938,39.1088546873487,39.5999862805036,
40.0911178736586,40.5822494668135,41.0733810599684,41.5645126531233,42.0556442462782,
42.5467758394332,43.0379074325881,43.529039025743,44.0201706188979,44.5113022120528,
45.0024338052078,45.4935653983627,45.9846969915176,46.4758285846725,46.9669601778274,
47.4580917709823,47.9492233641373,48.4403549572922,48.9314865504471,49.422618143602,
49.9137497367569,50.4048813299118,50.8960129230668,51.3871445162217,51.8782761093766,
52.3694077025315,52.8605392956864,53.3516708888414,53.8428024819963,54.3339340751512,
54.8250656683061,55.316197261461,55.8073288546159,56.2984604477709,56.7895920409258,
57.2807236340807,57.7718552272356,58.2629868203905,58.7541184135455,59.2452500067004,
59.7363815998553,60.2275131930102,60.7186447861651,61.20977637932,61.700907972475,
62.1920395656299,62.6831711587848,63.1743027519397,63.6654343450946,64.1565659382495,
64.6476975314045,65.1388291245594,65.6299607177143,66.1210923108692,66.6122239040241,
67.1033554971791,67.594487090334,68.0856186834889,68.5767502766438,69.0678818697987,
69.5590134629536,70.0501450561086,70.5412766492635,71.0324082424184,71.5235398355733,
72.0146714287282,72.5058030218832,72.9969346150381,73.488066208193,73.9791978013479),
 .UNSPECIFIED.);
#160=B_SPLINE_SURFACE_WITH_KNOTS('',3,3,((#30791,#30792,#30793,#30794,#30795,
#30796,#30797,#30798,#30799,#30800,#30801,#30802,#30803,#30804,#30805,#30806,
#30807,#30808,#30809,#30810,#30811,#30812,#30813,#30814,#30815,#30816,#30817,
#30818,#30819,#30820,#30821,#30822,#30823,#30824,#30825,#30826,#30827,#30828,
#30829,#30830,#30831,#30832,#30833,#30834,#30835,#30836,#30837,#30838,#30839,
#30840,#30841,#30842,#30843,#30844,#30845,#30846,#30847,#30848,#30849,#30850,
#30851,#30852,#30853,#30854,#30855,#30856,#30857,#30858,#30859,#30860,#30861,
#30862,#30863,#30864,#30865,#30866,#30867,#30868,#30869,#30870,#30871,#30872,
#30873,#30874,#30875,#30876,#30877),(#30878,#30879,#30880,#30881,#30882,
#30883,#30884,#30885,#30886,#30887,#30888,#30889,#30890,#30891,#30892,#30893,
#30894,#30895,#30896,#30897,#30898,#30899,#30900,#30901,#30902,#30903,#30904,
#30905,#30906,#30907,#30908,#30909,#30910,#30911,#30912,#30913,#30914,#30915,
#30916,#30917,#30918,#30919,#30920,#30921,#30922,#30923,#30924,#30925,#30926,
#30927,#30928,#30929,#30930,#30931,#30932,#30933,#30934,#30935,#30936,#30937,
#30938,#30939,#30940,#30941,#30942,#30943,#30944,#30945,#30946,#30947,#30948,
#30949,#30950,#30951,#30952,#30953,#30954,#30955,#30956,#30957,#30958,#30959,
#30960,#30961,#30962,#30963,#30964),(#30965,#30966,#30967,#30968,#30969,
#30970,#30971,#30972,#30973,#30974,#30975,#30976,#30977,#30978,#30979,#30980,
#30981,#30982,#30983,#30984,#30985,#30986,#30987,#30988,#30989,#30990,#30991,
#30992,#30993,#30994,#30995,#30996,#30997,#30998,#30999,#31000,#31001,#31002,
#31003,#31004,#31005,#31006,#31007,#31008,#31009,#31010,#31011,#31012,#31013,
#31014,#31015,#31016,#31017,#31018,#31019,#31020,#31021,#31022,#31023,#31024,
#31025,#31026,#31027,#31028,#31029,#31030,#31031,#31032,#31033,#31034,#31035,
#31036,#31037,#31038,#31039,#31040,#31041,#31042,#31043,#31044,#31045,#31046,
#31047,#31048,#31049,#31050,#31051),(#31052,#31053,#31054,#31055,#31056,
#31057,#31058,#31059,#31060,#31061,#31062,#31063,#31064,#31065,#31066,#31067,
#31068,#31069,#31070,#31071,#31072,#31073,#31074,#31075,#31076,#31077,#31078,
#31079,#31080,#31081,#31082,#31083,#31084,#31085,#31086,#31087,#31088,#31089,
#31090,#31091,#31092,#31093,#31094,#31095,#31096,#31097,#31098,#31099,#31100,
#31101,#31102,#31103,#31104,#31105,#31106,#31107,#31108,#31109,#31110,#31111,
#31112,#31113,#31114,#31115,#31116,#31117,#31118,#31119,#31120,#31121,#31122,
#31123,#31124,#31125,#31126,#31127,#31128,#31129,#31130,#31131,#31132,#31133,
#31134,#31135,#31136,#31137,#31138),(#31139,#31140,#31141,#31142,#31143,
#31144,#31145,#31146,#31147,#31148,#31149,#31150,#31151,#31152,#31153,#31154,
#31155,#31156,#31157,#31158,#31159,#31160,#31161,#31162,#31163,#31164,#31165,
#31166,#31167,#31168,#31169,#31170,#31171,#31172,#31173,#31174,#31175,#31176,
#31177,#31178,#31179,#31180,#31181,#31182,#31183,#31184,#31185,#31186,#31187,
#31188,#31189,#31190,#31191,#31192,#31193,#31194,#31195,#31196,#31197,#31198,
#31199,#31200,#31201,#31202,#31203,#31204,#31205,#31206,#31207,#31208,#31209,
#31210,#31211,#31212,#31213,#31214,#31215,#31216,#31217,#31218,#31219,#31220,
#31221,#31222,#31223,#31224,#31225),(#31226,#31227,#31228,#31229,#31230,
#31231,#31232,#31233,#31234,#31235,#31236,#31237,#31238,#31239,#31240,#31241,
#31242,#31243,#31244,#31245,#31246,#31247,#31248,#31249,#31250,#31251,#31252,
#31253,#31254,#31255,#31256,#31257,#31258,#31259,#31260,#31261,#31262,#31263,
#31264,#31265,#31266,#31267,#31268,#31269,#31270,#31271,#31272,#31273,#31274,
#31275,#31276,#31277,#31278,#31279,#31280,#31281,#31282,#31283,#31284,#31285,
#31286,#31287,#31288,#31289,#31290,#31291,#31292,#31293,#31294,#31295,#31296,
#31297,#31298,#31299,#31300,#31301,#31302,#31303,#31304,#31305,#31306,#31307,
#31308,#31309,#31310,#31311,#31312),(#31313,#31314,#31315,#31316,#31317,
#31318,#31319,#31320,#31321,#31322,#31323,#31324,#31325,#31326,#31327,#31328,
#31329,#31330,#31331,#31332,#31333,#31334,#31335,#31336,#31337,#31338,#31339,
#31340,#31341,#31342,#31343,#31344,#31345,#31346,#31347,#31348,#31349,#31350,
#31351,#31352,#31353,#31354,#31355,#31356,#31357,#31358,#31359,#31360,#31361,
#31362,#31363,#31364,#31365,#31366,#31367,#31368,#31369,#31370,#31371,#31372,
#31373,#31374,#31375,#31376,#31377,#31378,#31379,#31380,#31381,#31382,#31383,
#31384,#31385,#31386,#31387,#31388,#31389,#31390,#31391,#31392,#31393,#31394,
#31395,#31396,#31397,#31398,#31399),(#31400,#31401,#31402,#31403,#31404,
#31405,#31406,#31407,#31408,#31409,#31410,#31411,#31412,#31413,#31414,#31415,
#31416,#31417,#31418,#31419,#31420,#31421,#31422,#31423,#31424,#31425,#31426,
#31427,#31428,#31429,#31430,#31431,#31432,#31433,#31434,#31435,#31436,#31437,
#31438,#31439,#31440,#31441,#31442,#31443,#31444,#31445,#31446,#31447,#31448,
#31449,#31450,#31451,#31452,#31453,#31454,#31455,#31456,#31457,#31458,#31459,
#31460,#31461,#31462,#31463,#31464,#31465,#31466,#31467,#31468,#31469,#31470,
#31471,#31472,#31473,#31474,#31475,#31476,#31477,#31478,#31479,#31480,#31481,
#31482,#31483,#31484,#31485,#31486),(#31487,#31488,#31489,#31490,#31491,
#31492,#31493,#31494,#31495,#31496,#31497,#31498,#31499,#31500,#31501,#31502,
#31503,#31504,#31505,#31506,#31507,#31508,#31509,#31510,#31511,#31512,#31513,
#31514,#31515,#31516,#31517,#31518,#31519,#31520,#31521,#31522,#31523,#31524,
#31525,#31526,#31527,#31528,#31529,#31530,#31531,#31532,#31533,#31534,#31535,
#31536,#31537,#31538,#31539,#31540,#31541,#31542,#31543,#31544,#31545,#31546,
#31547,#31548,#31549,#31550,#31551,#31552,#31553,#31554,#31555,#31556,#31557,
#31558,#31559,#31560,#31561,#31562,#31563,#31564,#31565,#31566,#31567,#31568,
#31569,#31570,#31571,#31572,#31573),(#31574,#31575,#31576,#31577,#31578,
#31579,#31580,#31581,#31582,#31583,#31584,#31585,#31586,#31587,#31588,#31589,
#31590,#31591,#31592,#31593,#31594,#31595,#31596,#31597,#31598,#31599,#31600,
#31601,#31602,#31603,#31604,#31605,#31606,#31607,#31608,#31609,#31610,#31611,
#31612,#31613,#31614,#31615,#31616,#31617,#31618,#31619,#31620,#31621,#31622,
#31623,#31624,#31625,#31626,#31627,#31628,#31629,#31630,#31631,#31632,#31633,
#31634,#31635,#31636,#31637,#31638,#31639,#31640,#31641,#31642,#31643,#31644,
#31645,#31646,#31647,#31648,#31649,#31650,#31651,#31652,#31653,#31654,#31655,
#31656,#31657,#31658,#31659,#31660),(#31661,#31662,#31663,#31664,#31665,
#31666,#31667,#31668,#31669,#31670,#31671,#31672,#31673,#31674,#31675,#31676,
#31677,#31678,#31679,#31680,#31681,#31682,#31683,#31684,#31685,#31686,#31687,
#31688,#31689,#31690,#31691,#31692,#31693,#31694,#31695,#31696,#31697,#31698,
#31699,#31700,#31701,#31702,#31703,#31704,#31705,#31706,#31707,#31708,#31709,
#31710,#31711,#31712,#31713,#31714,#31715,#31716,#31717,#31718,#31719,#31720,
#31721,#31722,#31723,#31724,#31725,#31726,#31727,#31728,#31729,#31730,#31731,
#31732,#31733,#31734,#31735,#31736,#31737,#31738,#31739,#31740,#31741,#31742,
#31743,#31744,#31745,#31746,#31747),(#31748,#31749,#31750,#31751,#31752,
#31753,#31754,#31755,#31756,#31757,#31758,#31759,#31760,#31761,#31762,#31763,
#31764,#31765,#31766,#31767,#31768,#31769,#31770,#31771,#31772,#31773,#31774,
#31775,#31776,#31777,#31778,#31779,#31780,#31781,#31782,#31783,#31784,#31785,
#31786,#31787,#31788,#31789,#31790,#31791,#31792,#31793,#31794,#31795,#31796,
#31797,#31798,#31799,#31800,#31801,#31802,#31803,#31804,#31805,#31806,#31807,
#31808,#31809,#31810,#31811,#31812,#31813,#31814,#31815,#31816,#31817,#31818,
#31819,#31820,#31821,#31822,#31823,#31824,#31825,#31826,#31827,#31828,#31829,
#31830,#31831,#31832,#31833,#31834)),.UNSPECIFIED.,.F.,.F.,.F.,(4,3,1,1,
3,4),(4,1,1,1,1,1,1,1,1,1,1,1,1,1,1,1,1,1,1,1,1,1,1,1,1,1,1,1,1,1,1,1,1,
1,1,1,1,1,1,1,1,1,1,1,1,1,1,1,1,1,1,1,1,1,1,1,1,1,1,1,1,1,1,1,1,1,1,1,1,
1,1,1,1,1,1,1,1,1,1,1,1,1,1,1,4),(-0.855237294951358,-0.838467936226788,
-0.119781133745207,0.359343401242513,0.838467936230234,0.85540498854205),
(32.7241439763348,33.2152755694897,33.7064071626446,34.1975387557996,34.6886703489545,
35.1798019421094,35.6709335352643,36.1620651284192,36.6531967215741,37.1443283147291,
37.635459907884,38.1265915010389,38.6177230941938,39.1088546873487,39.5999862805036,
40.0911178736586,40.5822494668135,41.0733810599684,41.5645126531233,42.0556442462782,
42.5467758394332,43.0379074325881,43.529039025743,44.0201706188979,44.5113022120528,
45.0024338052078,45.4935653983627,45.9846969915176,46.4758285846725,46.9669601778274,
47.4580917709823,47.9492233641373,48.4403549572922,48.9314865504471,49.422618143602,
49.9137497367569,50.4048813299118,50.8960129230668,51.3871445162217,51.8782761093766,
52.3694077025315,52.8605392956864,53.3516708888414,53.8428024819963,54.3339340751512,
54.8250656683061,55.316197261461,55.8073288546159,56.2984604477709,56.7895920409258,
57.2807236340807,57.7718552272356,58.2629868203905,58.7541184135455,59.2452500067004,
59.7363815998553,60.2275131930102,60.7186447861651,61.20977637932,61.700907972475,
62.1920395656299,62.6831711587848,63.1743027519397,63.6654343450946,64.1565659382495,
64.6476975314045,65.1388291245594,65.6299607177143,66.1210923108692,66.6122239040241,
67.1033554971791,67.594487090334,68.0856186834889,68.5767502766438,69.0678818697987,
69.5590134629536,70.0501450561086,70.5412766492635,71.0324082424184,71.5235398355733,
72.0146714287282,72.5058030218832,72.9969346150381,73.488066208193,73.9791978013479),
 .UNSPECIFIED.);
#161=B_SPLINE_SURFACE_WITH_KNOTS('',3,3,((#32063,#32064,#32065,#32066,#32067,
#32068,#32069,#32070,#32071,#32072,#32073,#32074,#32075,#32076,#32077,#32078,
#32079,#32080,#32081,#32082,#32083,#32084,#32085,#32086,#32087,#32088,#32089,
#32090,#32091,#32092,#32093,#32094,#32095,#32096,#32097,#32098,#32099,#32100,
#32101,#32102,#32103,#32104,#32105,#32106,#32107,#32108,#32109,#32110,#32111,
#32112,#32113,#32114,#32115,#32116,#32117,#32118,#32119,#32120,#32121,#32122,
#32123,#32124,#32125,#32126,#32127,#32128,#32129,#32130,#32131,#32132,#32133,
#32134,#32135,#32136,#32137,#32138,#32139),(#32140,#32141,#32142,#32143,
#32144,#32145,#32146,#32147,#32148,#32149,#32150,#32151,#32152,#32153,#32154,
#32155,#32156,#32157,#32158,#32159,#32160,#32161,#32162,#32163,#32164,#32165,
#32166,#32167,#32168,#32169,#32170,#32171,#32172,#32173,#32174,#32175,#32176,
#32177,#32178,#32179,#32180,#32181,#32182,#32183,#32184,#32185,#32186,#32187,
#32188,#32189,#32190,#32191,#32192,#32193,#32194,#32195,#32196,#32197,#32198,
#32199,#32200,#32201,#32202,#32203,#32204,#32205,#32206,#32207,#32208,#32209,
#32210,#32211,#32212,#32213,#32214,#32215,#32216),(#32217,#32218,#32219,
#32220,#32221,#32222,#32223,#32224,#32225,#32226,#32227,#32228,#32229,#32230,
#32231,#32232,#32233,#32234,#32235,#32236,#32237,#32238,#32239,#32240,#32241,
#32242,#32243,#32244,#32245,#32246,#32247,#32248,#32249,#32250,#32251,#32252,
#32253,#32254,#32255,#32256,#32257,#32258,#32259,#32260,#32261,#32262,#32263,
#32264,#32265,#32266,#32267,#32268,#32269,#32270,#32271,#32272,#32273,#32274,
#32275,#32276,#32277,#32278,#32279,#32280,#32281,#32282,#32283,#32284,#32285,
#32286,#32287,#32288,#32289,#32290,#32291,#32292,#32293),(#32294,#32295,
#32296,#32297,#32298,#32299,#32300,#32301,#32302,#32303,#32304,#32305,#32306,
#32307,#32308,#32309,#32310,#32311,#32312,#32313,#32314,#32315,#32316,#32317,
#32318,#32319,#32320,#32321,#32322,#32323,#32324,#32325,#32326,#32327,#32328,
#32329,#32330,#32331,#32332,#32333,#32334,#32335,#32336,#32337,#32338,#32339,
#32340,#32341,#32342,#32343,#32344,#32345,#32346,#32347,#32348,#32349,#32350,
#32351,#32352,#32353,#32354,#32355,#32356,#32357,#32358,#32359,#32360,#32361,
#32362,#32363,#32364,#32365,#32366,#32367,#32368,#32369,#32370)),
 .UNSPECIFIED.,.F.,.F.,.F.,(4,4),(4,1,1,1,1,1,1,1,1,1,1,1,1,1,1,1,1,1,1,
1,1,1,1,1,1,1,1,1,1,1,1,1,1,1,1,1,1,1,1,1,1,1,1,1,1,1,1,1,1,1,1,1,1,1,1,
1,1,1,1,1,1,1,1,1,1,1,1,1,1,1,1,1,1,1,4),(2.31637354466821,3.14159265358981),
(38.8932311051627,39.3884369771038,39.8836428490449,40.378848720986,40.8740545929272,
41.3692604648683,41.8644663368094,42.3596722087506,42.8548780806917,43.3500839526328,
43.845289824574,44.3404956965151,44.8357015684562,45.3309074403974,45.8261133123385,
46.3213191842796,46.8165250562207,47.3117309281619,47.806936800103,48.3021426720441,
48.7973485439853,49.2925544159264,49.7877602878675,50.2829661598087,50.7781720317498,
51.2733779036909,51.7685837756321,52.2637896475732,52.7589955195143,53.2542013914554,
53.7494072633966,54.2446131353377,54.7398190072788,55.23502487922,55.7302307511611,
56.2254366231022,56.7206424950434,57.2158483669845,57.7110542389256,58.2062601108668,
58.7014659828079,59.196671854749,59.6918777266901,60.1870835986313,60.6822894705724,
61.1774953425135,61.6727012144547,62.1679070863958,62.6631129583369,63.1583188302781,
63.6535247022192,64.1487305741603,64.6439364461014,65.1391423180426,65.6343481899837,
66.1295540619248,66.624759933866,67.1199658058071,67.6151716777482,68.1103775496894,
68.6055834216305,69.1007892935716,69.5959951655128,70.0912010374539,70.586406909395,
71.0816127813361,71.5768186532773,72.0720245252184,72.5672303971595,73.0624362691007,
73.5576421410418,74.0528480129829,74.5480538849241,75.0432597568652,75.5384656288063),
 .UNSPECIFIED.);
#162=B_SPLINE_SURFACE_WITH_KNOTS('',3,3,((#32373,#32374,#32375,#32376,#32377,
#32378,#32379,#32380,#32381,#32382,#32383,#32384,#32385,#32386,#32387,#32388,
#32389,#32390,#32391,#32392,#32393,#32394,#32395,#32396,#32397,#32398,#32399,
#32400,#32401,#32402,#32403,#32404,#32405,#32406,#32407,#32408,#32409,#32410,
#32411,#32412,#32413,#32414,#32415,#32416,#32417,#32418,#32419,#32420,#32421,
#32422,#32423,#32424,#32425,#32426,#32427,#32428,#32429,#32430,#32431,#32432,
#32433,#32434,#32435,#32436,#32437,#32438,#32439,#32440,#32441,#32442,#32443,
#32444,#32445,#32446,#32447,#32448,#32449),(#32450,#32451,#32452,#32453,
#32454,#32455,#32456,#32457,#32458,#32459,#32460,#32461,#32462,#32463,#32464,
#32465,#32466,#32467,#32468,#32469,#32470,#32471,#32472,#32473,#32474,#32475,
#32476,#32477,#32478,#32479,#32480,#32481,#32482,#32483,#32484,#32485,#32486,
#32487,#32488,#32489,#32490,#32491,#32492,#32493,#32494,#32495,#32496,#32497,
#32498,#32499,#32500,#32501,#32502,#32503,#32504,#32505,#32506,#32507,#32508,
#32509,#32510,#32511,#32512,#32513,#32514,#32515,#32516,#32517,#32518,#32519,
#32520,#32521,#32522,#32523,#32524,#32525,#32526),(#32527,#32528,#32529,
#32530,#32531,#32532,#32533,#32534,#32535,#32536,#32537,#32538,#32539,#32540,
#32541,#32542,#32543,#32544,#32545,#32546,#32547,#32548,#32549,#32550,#32551,
#32552,#32553,#32554,#32555,#32556,#32557,#32558,#32559,#32560,#32561,#32562,
#32563,#32564,#32565,#32566,#32567,#32568,#32569,#32570,#32571,#32572,#32573,
#32574,#32575,#32576,#32577,#32578,#32579,#32580,#32581,#32582,#32583,#32584,
#32585,#32586,#32587,#32588,#32589,#32590,#32591,#32592,#32593,#32594,#32595,
#32596,#32597,#32598,#32599,#32600,#32601,#32602,#32603),(#32604,#32605,
#32606,#32607,#32608,#32609,#32610,#32611,#32612,#32613,#32614,#32615,#32616,
#32617,#32618,#32619,#32620,#32621,#32622,#32623,#32624,#32625,#32626,#32627,
#32628,#32629,#32630,#32631,#32632,#32633,#32634,#32635,#32636,#32637,#32638,
#32639,#32640,#32641,#32642,#32643,#32644,#32645,#32646,#32647,#32648,#32649,
#32650,#32651,#32652,#32653,#32654,#32655,#32656,#32657,#32658,#32659,#32660,
#32661,#32662,#32663,#32664,#32665,#32666,#32667,#32668,#32669,#32670,#32671,
#32672,#32673,#32674,#32675,#32676,#32677,#32678,#32679,#32680)),
 .UNSPECIFIED.,.F.,.F.,.F.,(4,4),(4,1,1,1,1,1,1,1,1,1,1,1,1,1,1,1,1,1,1,
1,1,1,1,1,1,1,1,1,1,1,1,1,1,1,1,1,1,1,1,1,1,1,1,1,1,1,1,1,1,1,1,1,1,1,1,
1,1,1,1,1,1,1,1,1,1,1,1,1,1,1,1,1,1,1,4),(2.31637354466821,3.14159265358981),
(38.8932311051627,39.3884369771038,39.8836428490449,40.378848720986,40.8740545929272,
41.3692604648683,41.8644663368094,42.3596722087506,42.8548780806917,43.3500839526328,
43.845289824574,44.3404956965151,44.8357015684562,45.3309074403974,45.8261133123385,
46.3213191842796,46.8165250562207,47.3117309281619,47.806936800103,48.3021426720441,
48.7973485439853,49.2925544159264,49.7877602878675,50.2829661598087,50.7781720317498,
51.2733779036909,51.7685837756321,52.2637896475732,52.7589955195143,53.2542013914554,
53.7494072633966,54.2446131353377,54.7398190072788,55.23502487922,55.7302307511611,
56.2254366231022,56.7206424950434,57.2158483669845,57.7110542389256,58.2062601108668,
58.7014659828079,59.196671854749,59.6918777266901,60.1870835986313,60.6822894705724,
61.1774953425135,61.6727012144547,62.1679070863958,62.6631129583369,63.1583188302781,
63.6535247022192,64.1487305741603,64.6439364461014,65.1391423180426,65.6343481899837,
66.1295540619248,66.624759933866,67.1199658058071,67.6151716777482,68.1103775496894,
68.6055834216305,69.1007892935716,69.5959951655128,70.0912010374539,70.586406909395,
71.0816127813361,71.5768186532773,72.0720245252184,72.5672303971595,73.0624362691007,
73.5576421410418,74.0528480129829,74.5480538849241,75.0432597568652,75.5384656288063),
 .UNSPECIFIED.);
#163=B_SPLINE_SURFACE_WITH_KNOTS('',3,3,((#32683,#32684,#32685,#32686,#32687,
#32688,#32689,#32690,#32691,#32692,#32693,#32694,#32695,#32696,#32697,#32698,
#32699,#32700,#32701,#32702,#32703,#32704,#32705,#32706,#32707,#32708,#32709,
#32710,#32711,#32712,#32713,#32714,#32715,#32716,#32717,#32718,#32719,#32720,
#32721,#32722,#32723,#32724,#32725,#32726,#32727,#32728,#32729,#32730,#32731,
#32732,#32733,#32734,#32735,#32736,#32737,#32738,#32739,#32740,#32741,#32742,
#32743,#32744,#32745,#32746,#32747,#32748,#32749,#32750,#32751,#32752,#32753,
#32754,#32755,#32756,#32757,#32758,#32759),(#32760,#32761,#32762,#32763,
#32764,#32765,#32766,#32767,#32768,#32769,#32770,#32771,#32772,#32773,#32774,
#32775,#32776,#32777,#32778,#32779,#32780,#32781,#32782,#32783,#32784,#32785,
#32786,#32787,#32788,#32789,#32790,#32791,#32792,#32793,#32794,#32795,#32796,
#32797,#32798,#32799,#32800,#32801,#32802,#32803,#32804,#32805,#32806,#32807,
#32808,#32809,#32810,#32811,#32812,#32813,#32814,#32815,#32816,#32817,#32818,
#32819,#32820,#32821,#32822,#32823,#32824,#32825,#32826,#32827,#32828,#32829,
#32830,#32831,#32832,#32833,#32834,#32835,#32836),(#32837,#32838,#32839,
#32840,#32841,#32842,#32843,#32844,#32845,#32846,#32847,#32848,#32849,#32850,
#32851,#32852,#32853,#32854,#32855,#32856,#32857,#32858,#32859,#32860,#32861,
#32862,#32863,#32864,#32865,#32866,#32867,#32868,#32869,#32870,#32871,#32872,
#32873,#32874,#32875,#32876,#32877,#32878,#32879,#32880,#32881,#32882,#32883,
#32884,#32885,#32886,#32887,#32888,#32889,#32890,#32891,#32892,#32893,#32894,
#32895,#32896,#32897,#32898,#32899,#32900,#32901,#32902,#32903,#32904,#32905,
#32906,#32907,#32908,#32909,#32910,#32911,#32912,#32913),(#32914,#32915,
#32916,#32917,#32918,#32919,#32920,#32921,#32922,#32923,#32924,#32925,#32926,
#32927,#32928,#32929,#32930,#32931,#32932,#32933,#32934,#32935,#32936,#32937,
#32938,#32939,#32940,#32941,#32942,#32943,#32944,#32945,#32946,#32947,#32948,
#32949,#32950,#32951,#32952,#32953,#32954,#32955,#32956,#32957,#32958,#32959,
#32960,#32961,#32962,#32963,#32964,#32965,#32966,#32967,#32968,#32969,#32970,
#32971,#32972,#32973,#32974,#32975,#32976,#32977,#32978,#32979,#32980,#32981,
#32982,#32983,#32984,#32985,#32986,#32987,#32988,#32989,#32990)),
 .UNSPECIFIED.,.F.,.F.,.F.,(4,4),(4,1,1,1,1,1,1,1,1,1,1,1,1,1,1,1,1,1,1,
1,1,1,1,1,1,1,1,1,1,1,1,1,1,1,1,1,1,1,1,1,1,1,1,1,1,1,1,1,1,1,1,1,1,1,1,
1,1,1,1,1,1,1,1,1,1,1,1,1,1,1,1,1,1,1,4),(2.31637354466821,3.14161839837776),
(38.8932311051627,39.3884369771038,39.8836428490449,40.378848720986,40.8740545929272,
41.3692604648683,41.8644663368094,42.3596722087506,42.8548780806917,43.3500839526328,
43.845289824574,44.3404956965151,44.8357015684562,45.3309074403974,45.8261133123385,
46.3213191842796,46.8165250562207,47.3117309281619,47.806936800103,48.3021426720441,
48.7973485439853,49.2925544159264,49.7877602878675,50.2829661598087,50.7781720317498,
51.2733779036909,51.7685837756321,52.2637896475732,52.7589955195143,53.2542013914554,
53.7494072633966,54.2446131353377,54.7398190072788,55.23502487922,55.7302307511611,
56.2254366231022,56.7206424950434,57.2158483669845,57.7110542389256,58.2062601108668,
58.7014659828079,59.196671854749,59.6918777266901,60.1870835986313,60.6822894705724,
61.1774953425135,61.6727012144547,62.1679070863958,62.6631129583369,63.1583188302781,
63.6535247022192,64.1487305741603,64.6439364461014,65.1391423180426,65.6343481899837,
66.1295540619248,66.624759933866,67.1199658058071,67.6151716777482,68.1103775496894,
68.6055834216305,69.1007892935716,69.5959951655128,70.0912010374539,70.586406909395,
71.0816127813361,71.5768186532773,72.0720245252184,72.5672303971595,73.0624362691007,
73.5576421410418,74.0528480129829,74.5480538849241,75.0432597568652,75.5384656288063),
 .UNSPECIFIED.);
#164=B_SPLINE_SURFACE_WITH_KNOTS('',3,3,((#32993,#32994,#32995,#32996,#32997,
#32998,#32999,#33000,#33001,#33002,#33003,#33004,#33005,#33006,#33007,#33008,
#33009,#33010,#33011,#33012,#33013,#33014,#33015,#33016,#33017,#33018,#33019,
#33020,#33021,#33022,#33023,#33024,#33025,#33026,#33027,#33028,#33029,#33030,
#33031,#33032,#33033,#33034,#33035,#33036,#33037,#33038,#33039,#33040,#33041,
#33042,#33043,#33044,#33045,#33046,#33047,#33048,#33049,#33050,#33051,#33052,
#33053,#33054,#33055,#33056,#33057,#33058,#33059,#33060,#33061,#33062,#33063,
#33064,#33065,#33066,#33067,#33068,#33069),(#33070,#33071,#33072,#33073,
#33074,#33075,#33076,#33077,#33078,#33079,#33080,#33081,#33082,#33083,#33084,
#33085,#33086,#33087,#33088,#33089,#33090,#33091,#33092,#33093,#33094,#33095,
#33096,#33097,#33098,#33099,#33100,#33101,#33102,#33103,#33104,#33105,#33106,
#33107,#33108,#33109,#33110,#33111,#33112,#33113,#33114,#33115,#33116,#33117,
#33118,#33119,#33120,#33121,#33122,#33123,#33124,#33125,#33126,#33127,#33128,
#33129,#33130,#33131,#33132,#33133,#33134,#33135,#33136,#33137,#33138,#33139,
#33140,#33141,#33142,#33143,#33144,#33145,#33146),(#33147,#33148,#33149,
#33150,#33151,#33152,#33153,#33154,#33155,#33156,#33157,#33158,#33159,#33160,
#33161,#33162,#33163,#33164,#33165,#33166,#33167,#33168,#33169,#33170,#33171,
#33172,#33173,#33174,#33175,#33176,#33177,#33178,#33179,#33180,#33181,#33182,
#33183,#33184,#33185,#33186,#33187,#33188,#33189,#33190,#33191,#33192,#33193,
#33194,#33195,#33196,#33197,#33198,#33199,#33200,#33201,#33202,#33203,#33204,
#33205,#33206,#33207,#33208,#33209,#33210,#33211,#33212,#33213,#33214,#33215,
#33216,#33217,#33218,#33219,#33220,#33221,#33222,#33223),(#33224,#33225,
#33226,#33227,#33228,#33229,#33230,#33231,#33232,#33233,#33234,#33235,#33236,
#33237,#33238,#33239,#33240,#33241,#33242,#33243,#33244,#33245,#33246,#33247,
#33248,#33249,#33250,#33251,#33252,#33253,#33254,#33255,#33256,#33257,#33258,
#33259,#33260,#33261,#33262,#33263,#33264,#33265,#33266,#33267,#33268,#33269,
#33270,#33271,#33272,#33273,#33274,#33275,#33276,#33277,#33278,#33279,#33280,
#33281,#33282,#33283,#33284,#33285,#33286,#33287,#33288,#33289,#33290,#33291,
#33292,#33293,#33294,#33295,#33296,#33297,#33298,#33299,#33300)),
 .UNSPECIFIED.,.F.,.F.,.F.,(4,4),(4,1,1,1,1,1,1,1,1,1,1,1,1,1,1,1,1,1,1,
1,1,1,1,1,1,1,1,1,1,1,1,1,1,1,1,1,1,1,1,1,1,1,1,1,1,1,1,1,1,1,1,1,1,1,1,
1,1,1,1,1,1,1,1,1,1,1,1,1,1,1,1,1,1,1,4),(2.31637354466821,3.14162080281466),
(38.8932311051627,39.3884369771038,39.8836428490449,40.378848720986,40.8740545929272,
41.3692604648683,41.8644663368094,42.3596722087506,42.8548780806917,43.3500839526328,
43.845289824574,44.3404956965151,44.8357015684562,45.3309074403974,45.8261133123385,
46.3213191842796,46.8165250562207,47.3117309281619,47.806936800103,48.3021426720441,
48.7973485439853,49.2925544159264,49.7877602878675,50.2829661598087,50.7781720317498,
51.2733779036909,51.7685837756321,52.2637896475732,52.7589955195143,53.2542013914554,
53.7494072633966,54.2446131353377,54.7398190072788,55.23502487922,55.7302307511611,
56.2254366231022,56.7206424950434,57.2158483669845,57.7110542389256,58.2062601108668,
58.7014659828079,59.196671854749,59.6918777266901,60.1870835986313,60.6822894705724,
61.1774953425135,61.6727012144547,62.1679070863958,62.6631129583369,63.1583188302781,
63.6535247022192,64.1487305741603,64.6439364461014,65.1391423180426,65.6343481899837,
66.1295540619248,66.624759933866,67.1199658058071,67.6151716777482,68.1103775496894,
68.6055834216305,69.1007892935716,69.5959951655128,70.0912010374539,70.586406909395,
71.0816127813361,71.5768186532773,72.0720245252184,72.5672303971595,73.0624362691007,
73.5576421410418,74.0528480129829,74.5480538849241,75.0432597568652,75.5384656288063),
 .UNSPECIFIED.);
#165=B_SPLINE_SURFACE_WITH_KNOTS('',3,3,((#33303,#33304,#33305,#33306,#33307,
#33308,#33309,#33310,#33311,#33312,#33313,#33314,#33315,#33316,#33317,#33318,
#33319,#33320,#33321,#33322,#33323,#33324,#33325,#33326,#33327,#33328,#33329,
#33330,#33331,#33332,#33333,#33334,#33335,#33336,#33337,#33338,#33339,#33340,
#33341,#33342,#33343,#33344,#33345,#33346,#33347,#33348,#33349,#33350,#33351,
#33352,#33353,#33354,#33355,#33356,#33357,#33358,#33359,#33360,#33361,#33362,
#33363,#33364,#33365,#33366,#33367,#33368,#33369,#33370,#33371,#33372,#33373,
#33374,#33375,#33376,#33377,#33378,#33379),(#33380,#33381,#33382,#33383,
#33384,#33385,#33386,#33387,#33388,#33389,#33390,#33391,#33392,#33393,#33394,
#33395,#33396,#33397,#33398,#33399,#33400,#33401,#33402,#33403,#33404,#33405,
#33406,#33407,#33408,#33409,#33410,#33411,#33412,#33413,#33414,#33415,#33416,
#33417,#33418,#33419,#33420,#33421,#33422,#33423,#33424,#33425,#33426,#33427,
#33428,#33429,#33430,#33431,#33432,#33433,#33434,#33435,#33436,#33437,#33438,
#33439,#33440,#33441,#33442,#33443,#33444,#33445,#33446,#33447,#33448,#33449,
#33450,#33451,#33452,#33453,#33454,#33455,#33456),(#33457,#33458,#33459,
#33460,#33461,#33462,#33463,#33464,#33465,#33466,#33467,#33468,#33469,#33470,
#33471,#33472,#33473,#33474,#33475,#33476,#33477,#33478,#33479,#33480,#33481,
#33482,#33483,#33484,#33485,#33486,#33487,#33488,#33489,#33490,#33491,#33492,
#33493,#33494,#33495,#33496,#33497,#33498,#33499,#33500,#33501,#33502,#33503,
#33504,#33505,#33506,#33507,#33508,#33509,#33510,#33511,#33512,#33513,#33514,
#33515,#33516,#33517,#33518,#33519,#33520,#33521,#33522,#33523,#33524,#33525,
#33526,#33527,#33528,#33529,#33530,#33531,#33532,#33533),(#33534,#33535,
#33536,#33537,#33538,#33539,#33540,#33541,#33542,#33543,#33544,#33545,#33546,
#33547,#33548,#33549,#33550,#33551,#33552,#33553,#33554,#33555,#33556,#33557,
#33558,#33559,#33560,#33561,#33562,#33563,#33564,#33565,#33566,#33567,#33568,
#33569,#33570,#33571,#33572,#33573,#33574,#33575,#33576,#33577,#33578,#33579,
#33580,#33581,#33582,#33583,#33584,#33585,#33586,#33587,#33588,#33589,#33590,
#33591,#33592,#33593,#33594,#33595,#33596,#33597,#33598,#33599,#33600,#33601,
#33602,#33603,#33604,#33605,#33606,#33607,#33608,#33609,#33610)),
 .UNSPECIFIED.,.F.,.F.,.F.,(4,4),(4,1,1,1,1,1,1,1,1,1,1,1,1,1,1,1,1,1,1,
1,1,1,1,1,1,1,1,1,1,1,1,1,1,1,1,1,1,1,1,1,1,1,1,1,1,1,1,1,1,1,1,1,1,1,1,
1,1,1,1,1,1,1,1,1,1,1,1,1,1,1,1,1,1,1,4),(2.31637354466821,3.14161870715354),
(38.8932311051627,39.3884369771038,39.8836428490449,40.378848720986,40.8740545929272,
41.3692604648683,41.8644663368094,42.3596722087506,42.8548780806917,43.3500839526328,
43.845289824574,44.3404956965151,44.8357015684562,45.3309074403974,45.8261133123385,
46.3213191842796,46.8165250562207,47.3117309281619,47.806936800103,48.3021426720441,
48.7973485439853,49.2925544159264,49.7877602878675,50.2829661598087,50.7781720317498,
51.2733779036909,51.7685837756321,52.2637896475732,52.7589955195143,53.2542013914554,
53.7494072633966,54.2446131353377,54.7398190072788,55.23502487922,55.7302307511611,
56.2254366231022,56.7206424950434,57.2158483669845,57.7110542389256,58.2062601108668,
58.7014659828079,59.196671854749,59.6918777266901,60.1870835986313,60.6822894705724,
61.1774953425135,61.6727012144547,62.1679070863958,62.6631129583369,63.1583188302781,
63.6535247022192,64.1487305741603,64.6439364461014,65.1391423180426,65.6343481899837,
66.1295540619248,66.624759933866,67.1199658058071,67.6151716777482,68.1103775496894,
68.6055834216305,69.1007892935716,69.5959951655128,70.0912010374539,70.586406909395,
71.0816127813361,71.5768186532773,72.0720245252184,72.5672303971595,73.0624362691007,
73.5576421410418,74.0528480129829,74.5480538849241,75.0432597568652,75.5384656288063),
 .UNSPECIFIED.);
#166=B_SPLINE_SURFACE_WITH_KNOTS('',3,3,((#33613,#33614,#33615,#33616,#33617,
#33618,#33619,#33620,#33621,#33622,#33623,#33624,#33625,#33626,#33627,#33628,
#33629,#33630,#33631,#33632,#33633,#33634,#33635,#33636,#33637,#33638,#33639,
#33640,#33641,#33642,#33643,#33644,#33645,#33646,#33647,#33648,#33649,#33650,
#33651,#33652,#33653,#33654,#33655,#33656,#33657,#33658,#33659,#33660,#33661,
#33662,#33663,#33664,#33665,#33666,#33667,#33668,#33669,#33670,#33671,#33672,
#33673,#33674,#33675,#33676,#33677,#33678,#33679,#33680,#33681,#33682,#33683,
#33684,#33685,#33686,#33687,#33688,#33689),(#33690,#33691,#33692,#33693,
#33694,#33695,#33696,#33697,#33698,#33699,#33700,#33701,#33702,#33703,#33704,
#33705,#33706,#33707,#33708,#33709,#33710,#33711,#33712,#33713,#33714,#33715,
#33716,#33717,#33718,#33719,#33720,#33721,#33722,#33723,#33724,#33725,#33726,
#33727,#33728,#33729,#33730,#33731,#33732,#33733,#33734,#33735,#33736,#33737,
#33738,#33739,#33740,#33741,#33742,#33743,#33744,#33745,#33746,#33747,#33748,
#33749,#33750,#33751,#33752,#33753,#33754,#33755,#33756,#33757,#33758,#33759,
#33760,#33761,#33762,#33763,#33764,#33765,#33766),(#33767,#33768,#33769,
#33770,#33771,#33772,#33773,#33774,#33775,#33776,#33777,#33778,#33779,#33780,
#33781,#33782,#33783,#33784,#33785,#33786,#33787,#33788,#33789,#33790,#33791,
#33792,#33793,#33794,#33795,#33796,#33797,#33798,#33799,#33800,#33801,#33802,
#33803,#33804,#33805,#33806,#33807,#33808,#33809,#33810,#33811,#33812,#33813,
#33814,#33815,#33816,#33817,#33818,#33819,#33820,#33821,#33822,#33823,#33824,
#33825,#33826,#33827,#33828,#33829,#33830,#33831,#33832,#33833,#33834,#33835,
#33836,#33837,#33838,#33839,#33840,#33841,#33842,#33843),(#33844,#33845,
#33846,#33847,#33848,#33849,#33850,#33851,#33852,#33853,#33854,#33855,#33856,
#33857,#33858,#33859,#33860,#33861,#33862,#33863,#33864,#33865,#33866,#33867,
#33868,#33869,#33870,#33871,#33872,#33873,#33874,#33875,#33876,#33877,#33878,
#33879,#33880,#33881,#33882,#33883,#33884,#33885,#33886,#33887,#33888,#33889,
#33890,#33891,#33892,#33893,#33894,#33895,#33896,#33897,#33898,#33899,#33900,
#33901,#33902,#33903,#33904,#33905,#33906,#33907,#33908,#33909,#33910,#33911,
#33912,#33913,#33914,#33915,#33916,#33917,#33918,#33919,#33920)),
 .UNSPECIFIED.,.F.,.F.,.F.,(4,4),(4,1,1,1,1,1,1,1,1,1,1,1,1,1,1,1,1,1,1,
1,1,1,1,1,1,1,1,1,1,1,1,1,1,1,1,1,1,1,1,1,1,1,1,1,1,1,1,1,1,1,1,1,1,1,1,
1,1,1,1,1,1,1,1,1,1,1,1,1,1,1,1,1,1,1,4),(2.31637354466821,3.14162282532898),
(38.8932311051627,39.3884369771038,39.8836428490449,40.378848720986,40.8740545929272,
41.3692604648683,41.8644663368094,42.3596722087506,42.8548780806917,43.3500839526328,
43.845289824574,44.3404956965151,44.8357015684562,45.3309074403974,45.8261133123385,
46.3213191842796,46.8165250562207,47.3117309281619,47.806936800103,48.3021426720441,
48.7973485439853,49.2925544159264,49.7877602878675,50.2829661598087,50.7781720317498,
51.2733779036909,51.7685837756321,52.2637896475732,52.7589955195143,53.2542013914554,
53.7494072633966,54.2446131353377,54.7398190072788,55.23502487922,55.7302307511611,
56.2254366231022,56.7206424950434,57.2158483669845,57.7110542389256,58.2062601108668,
58.7014659828079,59.196671854749,59.6918777266901,60.1870835986313,60.6822894705724,
61.1774953425135,61.6727012144547,62.1679070863958,62.6631129583369,63.1583188302781,
63.6535247022192,64.1487305741603,64.6439364461014,65.1391423180426,65.6343481899837,
66.1295540619248,66.624759933866,67.1199658058071,67.6151716777482,68.1103775496894,
68.6055834216305,69.1007892935716,69.5959951655128,70.0912010374539,70.586406909395,
71.0816127813361,71.5768186532773,72.0720245252184,72.5672303971595,73.0624362691007,
73.5576421410418,74.0528480129829,74.5480538849241,75.0432597568652,75.5384656288063),
 .UNSPECIFIED.);
#167=B_SPLINE_SURFACE_WITH_KNOTS('',3,3,((#33922,#33923,#33924,#33925,#33926,
#33927,#33928,#33929,#33930,#33931,#33932,#33933,#33934,#33935,#33936,#33937,
#33938,#33939,#33940,#33941,#33942,#33943,#33944,#33945,#33946,#33947,#33948,
#33949,#33950,#33951,#33952,#33953,#33954,#33955,#33956,#33957,#33958,#33959,
#33960,#33961,#33962,#33963,#33964,#33965,#33966,#33967,#33968,#33969,#33970,
#33971,#33972,#33973,#33974,#33975,#33976,#33977,#33978,#33979,#33980,#33981,
#33982,#33983,#33984,#33985,#33986,#33987,#33988,#33989,#33990,#33991,#33992,
#33993,#33994,#33995,#33996,#33997,#33998),(#33999,#34000,#34001,#34002,
#34003,#34004,#34005,#34006,#34007,#34008,#34009,#34010,#34011,#34012,#34013,
#34014,#34015,#34016,#34017,#34018,#34019,#34020,#34021,#34022,#34023,#34024,
#34025,#34026,#34027,#34028,#34029,#34030,#34031,#34032,#34033,#34034,#34035,
#34036,#34037,#34038,#34039,#34040,#34041,#34042,#34043,#34044,#34045,#34046,
#34047,#34048,#34049,#34050,#34051,#34052,#34053,#34054,#34055,#34056,#34057,
#34058,#34059,#34060,#34061,#34062,#34063,#34064,#34065,#34066,#34067,#34068,
#34069,#34070,#34071,#34072,#34073,#34074,#34075),(#34076,#34077,#34078,
#34079,#34080,#34081,#34082,#34083,#34084,#34085,#34086,#34087,#34088,#34089,
#34090,#34091,#34092,#34093,#34094,#34095,#34096,#34097,#34098,#34099,#34100,
#34101,#34102,#34103,#34104,#34105,#34106,#34107,#34108,#34109,#34110,#34111,
#34112,#34113,#34114,#34115,#34116,#34117,#34118,#34119,#34120,#34121,#34122,
#34123,#34124,#34125,#34126,#34127,#34128,#34129,#34130,#34131,#34132,#34133,
#34134,#34135,#34136,#34137,#34138,#34139,#34140,#34141,#34142,#34143,#34144,
#34145,#34146,#34147,#34148,#34149,#34150,#34151,#34152),(#34153,#34154,
#34155,#34156,#34157,#34158,#34159,#34160,#34161,#34162,#34163,#34164,#34165,
#34166,#34167,#34168,#34169,#34170,#34171,#34172,#34173,#34174,#34175,#34176,
#34177,#34178,#34179,#34180,#34181,#34182,#34183,#34184,#34185,#34186,#34187,
#34188,#34189,#34190,#34191,#34192,#34193,#34194,#34195,#34196,#34197,#34198,
#34199,#34200,#34201,#34202,#34203,#34204,#34205,#34206,#34207,#34208,#34209,
#34210,#34211,#34212,#34213,#34214,#34215,#34216,#34217,#34218,#34219,#34220,
#34221,#34222,#34223,#34224,#34225,#34226,#34227,#34228,#34229)),
 .UNSPECIFIED.,.F.,.F.,.F.,(4,4),(4,1,1,1,1,1,1,1,1,1,1,1,1,1,1,1,1,1,1,
1,1,1,1,1,1,1,1,1,1,1,1,1,1,1,1,1,1,1,1,1,1,1,1,1,1,1,1,1,1,1,1,1,1,1,1,
1,1,1,1,1,1,1,1,1,1,1,1,1,1,1,1,1,1,1,4),(2.31637354466821,3.14159265358981),
(38.8932311051627,39.3884369771038,39.8836428490449,40.378848720986,40.8740545929272,
41.3692604648683,41.8644663368094,42.3596722087506,42.8548780806917,43.3500839526328,
43.845289824574,44.3404956965151,44.8357015684562,45.3309074403974,45.8261133123385,
46.3213191842796,46.8165250562207,47.3117309281619,47.806936800103,48.3021426720441,
48.7973485439853,49.2925544159264,49.7877602878675,50.2829661598087,50.7781720317498,
51.2733779036909,51.7685837756321,52.2637896475732,52.7589955195143,53.2542013914554,
53.7494072633966,54.2446131353377,54.7398190072788,55.23502487922,55.7302307511611,
56.2254366231022,56.7206424950434,57.2158483669845,57.7110542389256,58.2062601108668,
58.7014659828079,59.196671854749,59.6918777266901,60.1870835986313,60.6822894705724,
61.1774953425135,61.6727012144547,62.1679070863958,62.6631129583369,63.1583188302781,
63.6535247022192,64.1487305741603,64.6439364461014,65.1391423180426,65.6343481899837,
66.1295540619248,66.624759933866,67.1199658058071,67.6151716777482,68.1103775496894,
68.6055834216305,69.1007892935716,69.5959951655128,70.0912010374539,70.586406909395,
71.0816127813361,71.5768186532773,72.0720245252184,72.5672303971595,73.0624362691007,
73.5576421410418,74.0528480129829,74.5480538849241,75.0432597568652,75.5384656288063),
 .UNSPECIFIED.);
#168=B_SPLINE_SURFACE_WITH_KNOTS('',3,3,((#34230,#34231,#34232,#34233,#34234,
#34235,#34236,#34237,#34238,#34239,#34240,#34241,#34242,#34243,#34244,#34245,
#34246,#34247,#34248,#34249,#34250,#34251,#34252,#34253,#34254,#34255,#34256,
#34257,#34258,#34259,#34260,#34261,#34262,#34263,#34264,#34265,#34266,#34267,
#34268,#34269,#34270,#34271,#34272,#34273,#34274,#34275,#34276,#34277,#34278,
#34279,#34280,#34281,#34282,#34283,#34284,#34285,#34286,#34287,#34288,#34289,
#34290,#34291,#34292,#34293,#34294,#34295,#34296,#34297,#34298,#34299,#34300,
#34301,#34302,#34303,#34304,#34305,#34306),(#34307,#34308,#34309,#34310,
#34311,#34312,#34313,#34314,#34315,#34316,#34317,#34318,#34319,#34320,#34321,
#34322,#34323,#34324,#34325,#34326,#34327,#34328,#34329,#34330,#34331,#34332,
#34333,#34334,#34335,#34336,#34337,#34338,#34339,#34340,#34341,#34342,#34343,
#34344,#34345,#34346,#34347,#34348,#34349,#34350,#34351,#34352,#34353,#34354,
#34355,#34356,#34357,#34358,#34359,#34360,#34361,#34362,#34363,#34364,#34365,
#34366,#34367,#34368,#34369,#34370,#34371,#34372,#34373,#34374,#34375,#34376,
#34377,#34378,#34379,#34380,#34381,#34382,#34383),(#34384,#34385,#34386,
#34387,#34388,#34389,#34390,#34391,#34392,#34393,#34394,#34395,#34396,#34397,
#34398,#34399,#34400,#34401,#34402,#34403,#34404,#34405,#34406,#34407,#34408,
#34409,#34410,#34411,#34412,#34413,#34414,#34415,#34416,#34417,#34418,#34419,
#34420,#34421,#34422,#34423,#34424,#34425,#34426,#34427,#34428,#34429,#34430,
#34431,#34432,#34433,#34434,#34435,#34436,#34437,#34438,#34439,#34440,#34441,
#34442,#34443,#34444,#34445,#34446,#34447,#34448,#34449,#34450,#34451,#34452,
#34453,#34454,#34455,#34456,#34457,#34458,#34459,#34460),(#34461,#34462,
#34463,#34464,#34465,#34466,#34467,#34468,#34469,#34470,#34471,#34472,#34473,
#34474,#34475,#34476,#34477,#34478,#34479,#34480,#34481,#34482,#34483,#34484,
#34485,#34486,#34487,#34488,#34489,#34490,#34491,#34492,#34493,#34494,#34495,
#34496,#34497,#34498,#34499,#34500,#34501,#34502,#34503,#34504,#34505,#34506,
#34507,#34508,#34509,#34510,#34511,#34512,#34513,#34514,#34515,#34516,#34517,
#34518,#34519,#34520,#34521,#34522,#34523,#34524,#34525,#34526,#34527,#34528,
#34529,#34530,#34531,#34532,#34533,#34534,#34535,#34536,#34537)),
 .UNSPECIFIED.,.F.,.F.,.F.,(4,4),(4,1,1,1,1,1,1,1,1,1,1,1,1,1,1,1,1,1,1,
1,1,1,1,1,1,1,1,1,1,1,1,1,1,1,1,1,1,1,1,1,1,1,1,1,1,1,1,1,1,1,1,1,1,1,1,
1,1,1,1,1,1,1,1,1,1,1,1,1,1,1,1,1,1,1,4),(2.31637354466821,3.14159265358981),
(38.8932311051627,39.3884369771038,39.8836428490449,40.378848720986,40.8740545929272,
41.3692604648683,41.8644663368094,42.3596722087506,42.8548780806917,43.3500839526328,
43.845289824574,44.3404956965151,44.8357015684562,45.3309074403974,45.8261133123385,
46.3213191842796,46.8165250562207,47.3117309281619,47.806936800103,48.3021426720441,
48.7973485439853,49.2925544159264,49.7877602878675,50.2829661598087,50.7781720317498,
51.2733779036909,51.7685837756321,52.2637896475732,52.7589955195143,53.2542013914554,
53.7494072633966,54.2446131353377,54.7398190072788,55.23502487922,55.7302307511611,
56.2254366231022,56.7206424950434,57.2158483669845,57.7110542389256,58.2062601108668,
58.7014659828079,59.196671854749,59.6918777266901,60.1870835986313,60.6822894705724,
61.1774953425135,61.6727012144547,62.1679070863958,62.6631129583369,63.1583188302781,
63.6535247022192,64.1487305741603,64.6439364461014,65.1391423180426,65.6343481899837,
66.1295540619248,66.624759933866,67.1199658058071,67.6151716777482,68.1103775496894,
68.6055834216305,69.1007892935716,69.5959951655128,70.0912010374539,70.586406909395,
71.0816127813361,71.5768186532773,72.0720245252184,72.5672303971595,73.0624362691007,
73.5576421410418,74.0528480129829,74.5480538849241,75.0432597568652,75.5384656288063),
 .UNSPECIFIED.);
#169=B_SPLINE_SURFACE_WITH_KNOTS('',3,3,((#34538,#34539,#34540,#34541,#34542,
#34543,#34544,#34545,#34546,#34547,#34548,#34549,#34550,#34551,#34552,#34553,
#34554,#34555,#34556,#34557,#34558,#34559,#34560,#34561,#34562,#34563,#34564,
#34565,#34566,#34567,#34568,#34569,#34570,#34571,#34572,#34573,#34574,#34575,
#34576,#34577,#34578,#34579,#34580,#34581,#34582,#34583,#34584,#34585,#34586,
#34587,#34588,#34589,#34590,#34591,#34592,#34593,#34594,#34595,#34596,#34597,
#34598,#34599,#34600,#34601,#34602,#34603,#34604,#34605,#34606,#34607,#34608,
#34609,#34610,#34611,#34612,#34613,#34614),(#34615,#34616,#34617,#34618,
#34619,#34620,#34621,#34622,#34623,#34624,#34625,#34626,#34627,#34628,#34629,
#34630,#34631,#34632,#34633,#34634,#34635,#34636,#34637,#34638,#34639,#34640,
#34641,#34642,#34643,#34644,#34645,#34646,#34647,#34648,#34649,#34650,#34651,
#34652,#34653,#34654,#34655,#34656,#34657,#34658,#34659,#34660,#34661,#34662,
#34663,#34664,#34665,#34666,#34667,#34668,#34669,#34670,#34671,#34672,#34673,
#34674,#34675,#34676,#34677,#34678,#34679,#34680,#34681,#34682,#34683,#34684,
#34685,#34686,#34687,#34688,#34689,#34690,#34691),(#34692,#34693,#34694,
#34695,#34696,#34697,#34698,#34699,#34700,#34701,#34702,#34703,#34704,#34705,
#34706,#34707,#34708,#34709,#34710,#34711,#34712,#34713,#34714,#34715,#34716,
#34717,#34718,#34719,#34720,#34721,#34722,#34723,#34724,#34725,#34726,#34727,
#34728,#34729,#34730,#34731,#34732,#34733,#34734,#34735,#34736,#34737,#34738,
#34739,#34740,#34741,#34742,#34743,#34744,#34745,#34746,#34747,#34748,#34749,
#34750,#34751,#34752,#34753,#34754,#34755,#34756,#34757,#34758,#34759,#34760,
#34761,#34762,#34763,#34764,#34765,#34766,#34767,#34768),(#34769,#34770,
#34771,#34772,#34773,#34774,#34775,#34776,#34777,#34778,#34779,#34780,#34781,
#34782,#34783,#34784,#34785,#34786,#34787,#34788,#34789,#34790,#34791,#34792,
#34793,#34794,#34795,#34796,#34797,#34798,#34799,#34800,#34801,#34802,#34803,
#34804,#34805,#34806,#34807,#34808,#34809,#34810,#34811,#34812,#34813,#34814,
#34815,#34816,#34817,#34818,#34819,#34820,#34821,#34822,#34823,#34824,#34825,
#34826,#34827,#34828,#34829,#34830,#34831,#34832,#34833,#34834,#34835,#34836,
#34837,#34838,#34839,#34840,#34841,#34842,#34843,#34844,#34845)),
 .UNSPECIFIED.,.F.,.F.,.F.,(4,4),(4,1,1,1,1,1,1,1,1,1,1,1,1,1,1,1,1,1,1,
1,1,1,1,1,1,1,1,1,1,1,1,1,1,1,1,1,1,1,1,1,1,1,1,1,1,1,1,1,1,1,1,1,1,1,1,
1,1,1,1,1,1,1,1,1,1,1,1,1,1,1,1,1,1,1,4),(2.31637354466821,3.14159265358981),
(38.8932311051627,39.3884369771038,39.8836428490449,40.378848720986,40.8740545929272,
41.3692604648683,41.8644663368094,42.3596722087506,42.8548780806917,43.3500839526328,
43.845289824574,44.3404956965151,44.8357015684562,45.3309074403974,45.8261133123385,
46.3213191842796,46.8165250562207,47.3117309281619,47.806936800103,48.3021426720441,
48.7973485439853,49.2925544159264,49.7877602878675,50.2829661598087,50.7781720317498,
51.2733779036909,51.7685837756321,52.2637896475732,52.7589955195143,53.2542013914554,
53.7494072633966,54.2446131353377,54.7398190072788,55.23502487922,55.7302307511611,
56.2254366231022,56.7206424950434,57.2158483669845,57.7110542389256,58.2062601108668,
58.7014659828079,59.196671854749,59.6918777266901,60.1870835986313,60.6822894705724,
61.1774953425135,61.6727012144547,62.1679070863958,62.6631129583369,63.1583188302781,
63.6535247022192,64.1487305741603,64.6439364461014,65.1391423180426,65.6343481899837,
66.1295540619248,66.624759933866,67.1199658058071,67.6151716777482,68.1103775496894,
68.6055834216305,69.1007892935716,69.5959951655128,70.0912010374539,70.586406909395,
71.0816127813361,71.5768186532773,72.0720245252184,72.5672303971595,73.0624362691007,
73.5576421410418,74.0528480129829,74.5480538849241,75.0432597568652,75.5384656288063),
 .UNSPECIFIED.);
#170=B_SPLINE_SURFACE_WITH_KNOTS('',3,3,((#34846,#34847,#34848,#34849,#34850,
#34851,#34852,#34853,#34854,#34855,#34856,#34857,#34858,#34859,#34860,#34861,
#34862,#34863,#34864,#34865,#34866,#34867,#34868,#34869,#34870,#34871,#34872,
#34873,#34874,#34875,#34876,#34877,#34878,#34879,#34880,#34881,#34882,#34883,
#34884,#34885,#34886,#34887,#34888,#34889,#34890,#34891,#34892,#34893,#34894,
#34895,#34896,#34897,#34898,#34899,#34900,#34901,#34902,#34903,#34904,#34905,
#34906,#34907,#34908,#34909,#34910,#34911,#34912,#34913,#34914,#34915,#34916,
#34917,#34918,#34919,#34920,#34921,#34922),(#34923,#34924,#34925,#34926,
#34927,#34928,#34929,#34930,#34931,#34932,#34933,#34934,#34935,#34936,#34937,
#34938,#34939,#34940,#34941,#34942,#34943,#34944,#34945,#34946,#34947,#34948,
#34949,#34950,#34951,#34952,#34953,#34954,#34955,#34956,#34957,#34958,#34959,
#34960,#34961,#34962,#34963,#34964,#34965,#34966,#34967,#34968,#34969,#34970,
#34971,#34972,#34973,#34974,#34975,#34976,#34977,#34978,#34979,#34980,#34981,
#34982,#34983,#34984,#34985,#34986,#34987,#34988,#34989,#34990,#34991,#34992,
#34993,#34994,#34995,#34996,#34997,#34998,#34999),(#35000,#35001,#35002,
#35003,#35004,#35005,#35006,#35007,#35008,#35009,#35010,#35011,#35012,#35013,
#35014,#35015,#35016,#35017,#35018,#35019,#35020,#35021,#35022,#35023,#35024,
#35025,#35026,#35027,#35028,#35029,#35030,#35031,#35032,#35033,#35034,#35035,
#35036,#35037,#35038,#35039,#35040,#35041,#35042,#35043,#35044,#35045,#35046,
#35047,#35048,#35049,#35050,#35051,#35052,#35053,#35054,#35055,#35056,#35057,
#35058,#35059,#35060,#35061,#35062,#35063,#35064,#35065,#35066,#35067,#35068,
#35069,#35070,#35071,#35072,#35073,#35074,#35075,#35076),(#35077,#35078,
#35079,#35080,#35081,#35082,#35083,#35084,#35085,#35086,#35087,#35088,#35089,
#35090,#35091,#35092,#35093,#35094,#35095,#35096,#35097,#35098,#35099,#35100,
#35101,#35102,#35103,#35104,#35105,#35106,#35107,#35108,#35109,#35110,#35111,
#35112,#35113,#35114,#35115,#35116,#35117,#35118,#35119,#35120,#35121,#35122,
#35123,#35124,#35125,#35126,#35127,#35128,#35129,#35130,#35131,#35132,#35133,
#35134,#35135,#35136,#35137,#35138,#35139,#35140,#35141,#35142,#35143,#35144,
#35145,#35146,#35147,#35148,#35149,#35150,#35151,#35152,#35153)),
 .UNSPECIFIED.,.F.,.F.,.F.,(4,4),(4,1,1,1,1,1,1,1,1,1,1,1,1,1,1,1,1,1,1,
1,1,1,1,1,1,1,1,1,1,1,1,1,1,1,1,1,1,1,1,1,1,1,1,1,1,1,1,1,1,1,1,1,1,1,1,
1,1,1,1,1,1,1,1,1,1,1,1,1,1,1,1,1,1,1,4),(2.31637354466821,3.14159265358981),
(38.8932311051627,39.3884369771038,39.8836428490449,40.378848720986,40.8740545929272,
41.3692604648683,41.8644663368094,42.3596722087506,42.8548780806917,43.3500839526328,
43.845289824574,44.3404956965151,44.8357015684562,45.3309074403974,45.8261133123385,
46.3213191842796,46.8165250562207,47.3117309281619,47.806936800103,48.3021426720441,
48.7973485439853,49.2925544159264,49.7877602878675,50.2829661598087,50.7781720317498,
51.2733779036909,51.7685837756321,52.2637896475732,52.7589955195143,53.2542013914554,
53.7494072633966,54.2446131353377,54.7398190072788,55.23502487922,55.7302307511611,
56.2254366231022,56.7206424950434,57.2158483669845,57.7110542389256,58.2062601108668,
58.7014659828079,59.196671854749,59.6918777266901,60.1870835986313,60.6822894705724,
61.1774953425135,61.6727012144547,62.1679070863958,62.6631129583369,63.1583188302781,
63.6535247022192,64.1487305741603,64.6439364461014,65.1391423180426,65.6343481899837,
66.1295540619248,66.624759933866,67.1199658058071,67.6151716777482,68.1103775496894,
68.6055834216305,69.1007892935716,69.5959951655128,70.0912010374539,70.586406909395,
71.0816127813361,71.5768186532773,72.0720245252184,72.5672303971595,73.0624362691007,
73.5576421410418,74.0528480129829,74.5480538849241,75.0432597568652,75.5384656288063),
 .UNSPECIFIED.);
#171=B_SPLINE_SURFACE_WITH_KNOTS('',3,3,((#35154,#35155,#35156,#35157,#35158,
#35159,#35160,#35161,#35162,#35163,#35164,#35165,#35166,#35167,#35168,#35169,
#35170,#35171,#35172,#35173,#35174,#35175,#35176,#35177,#35178,#35179,#35180,
#35181,#35182,#35183,#35184,#35185,#35186,#35187,#35188,#35189,#35190,#35191,
#35192,#35193,#35194,#35195,#35196,#35197,#35198,#35199,#35200,#35201,#35202,
#35203,#35204,#35205,#35206,#35207,#35208,#35209,#35210,#35211,#35212,#35213,
#35214,#35215,#35216,#35217,#35218,#35219,#35220,#35221,#35222,#35223,#35224,
#35225,#35226,#35227,#35228,#35229,#35230),(#35231,#35232,#35233,#35234,
#35235,#35236,#35237,#35238,#35239,#35240,#35241,#35242,#35243,#35244,#35245,
#35246,#35247,#35248,#35249,#35250,#35251,#35252,#35253,#35254,#35255,#35256,
#35257,#35258,#35259,#35260,#35261,#35262,#35263,#35264,#35265,#35266,#35267,
#35268,#35269,#35270,#35271,#35272,#35273,#35274,#35275,#35276,#35277,#35278,
#35279,#35280,#35281,#35282,#35283,#35284,#35285,#35286,#35287,#35288,#35289,
#35290,#35291,#35292,#35293,#35294,#35295,#35296,#35297,#35298,#35299,#35300,
#35301,#35302,#35303,#35304,#35305,#35306,#35307),(#35308,#35309,#35310,
#35311,#35312,#35313,#35314,#35315,#35316,#35317,#35318,#35319,#35320,#35321,
#35322,#35323,#35324,#35325,#35326,#35327,#35328,#35329,#35330,#35331,#35332,
#35333,#35334,#35335,#35336,#35337,#35338,#35339,#35340,#35341,#35342,#35343,
#35344,#35345,#35346,#35347,#35348,#35349,#35350,#35351,#35352,#35353,#35354,
#35355,#35356,#35357,#35358,#35359,#35360,#35361,#35362,#35363,#35364,#35365,
#35366,#35367,#35368,#35369,#35370,#35371,#35372,#35373,#35374,#35375,#35376,
#35377,#35378,#35379,#35380,#35381,#35382,#35383,#35384),(#35385,#35386,
#35387,#35388,#35389,#35390,#35391,#35392,#35393,#35394,#35395,#35396,#35397,
#35398,#35399,#35400,#35401,#35402,#35403,#35404,#35405,#35406,#35407,#35408,
#35409,#35410,#35411,#35412,#35413,#35414,#35415,#35416,#35417,#35418,#35419,
#35420,#35421,#35422,#35423,#35424,#35425,#35426,#35427,#35428,#35429,#35430,
#35431,#35432,#35433,#35434,#35435,#35436,#35437,#35438,#35439,#35440,#35441,
#35442,#35443,#35444,#35445,#35446,#35447,#35448,#35449,#35450,#35451,#35452,
#35453,#35454,#35455,#35456,#35457,#35458,#35459,#35460,#35461)),
 .UNSPECIFIED.,.F.,.F.,.F.,(4,4),(4,1,1,1,1,1,1,1,1,1,1,1,1,1,1,1,1,1,1,
1,1,1,1,1,1,1,1,1,1,1,1,1,1,1,1,1,1,1,1,1,1,1,1,1,1,1,1,1,1,1,1,1,1,1,1,
1,1,1,1,1,1,1,1,1,1,1,1,1,1,1,1,1,1,1,4),(2.31637354466821,3.14161477686797),
(38.8932011059172,39.3884369771038,39.8836428490449,40.378848720986,40.8740545929272,
41.3692604648683,41.8644663368094,42.3596722087506,42.8548780806917,43.3500839526328,
43.845289824574,44.3404956965151,44.8357015684562,45.3309074403974,45.8261133123385,
46.3213191842796,46.8165250562207,47.3117309281619,47.806936800103,48.3021426720441,
48.7973485439853,49.2925544159264,49.7877602878675,50.2829661598087,50.7781720317498,
51.2733779036909,51.7685837756321,52.2637896475732,52.7589955195143,53.2542013914554,
53.7494072633966,54.2446131353377,54.7398190072788,55.23502487922,55.7302307511611,
56.2254366231022,56.7206424950434,57.2158483669845,57.7110542389256,58.2062601108668,
58.7014659828079,59.196671854749,59.6918777266901,60.1870835986313,60.6822894705724,
61.1774953425135,61.6727012144547,62.1679070863958,62.6631129583369,63.1583188302781,
63.6535247022192,64.1487305741603,64.6439364461014,65.1391423180426,65.6343481899837,
66.1295540619248,66.624759933866,67.1199658058071,67.6151716777482,68.1103775496894,
68.6055834216305,69.1007892935716,69.5959951655128,70.0912010374539,70.586406909395,
71.0816127813361,71.5768186532773,72.0720245252184,72.5672303971595,73.0624362691007,
73.5576421410418,74.0528480129829,74.5480538849241,75.0432597568652,75.5384656288063),
 .UNSPECIFIED.);
#172=B_SPLINE_SURFACE_WITH_KNOTS('',3,3,((#35574,#35575,#35576,#35577,#35578,
#35579,#35580,#35581,#35582,#35583,#35584,#35585,#35586,#35587,#35588,#35589,
#35590),(#35591,#35592,#35593,#35594,#35595,#35596,#35597,#35598,#35599,
#35600,#35601,#35602,#35603,#35604,#35605,#35606,#35607),(#35608,#35609,
#35610,#35611,#35612,#35613,#35614,#35615,#35616,#35617,#35618,#35619,#35620,
#35621,#35622,#35623,#35624),(#35625,#35626,#35627,#35628,#35629,#35630,
#35631,#35632,#35633,#35634,#35635,#35636,#35637,#35638,#35639,#35640,#35641),
(#35642,#35643,#35644,#35645,#35646,#35647,#35648,#35649,#35650,#35651,
#35652,#35653,#35654,#35655,#35656,#35657,#35658),(#35659,#35660,#35661,
#35662,#35663,#35664,#35665,#35666,#35667,#35668,#35669,#35670,#35671,#35672,
#35673,#35674,#35675),(#35676,#35677,#35678,#35679,#35680,#35681,#35682,
#35683,#35684,#35685,#35686,#35687,#35688,#35689,#35690,#35691,#35692),
(#35693,#35694,#35695,#35696,#35697,#35698,#35699,#35700,#35701,#35702,
#35703,#35704,#35705,#35706,#35707,#35708,#35709),(#35710,#35711,#35712,
#35713,#35714,#35715,#35716,#35717,#35718,#35719,#35720,#35721,#35722,#35723,
#35724,#35725,#35726),(#35727,#35728,#35729,#35730,#35731,#35732,#35733,
#35734,#35735,#35736,#35737,#35738,#35739,#35740,#35741,#35742,#35743),
(#35744,#35745,#35746,#35747,#35748,#35749,#35750,#35751,#35752,#35753,
#35754,#35755,#35756,#35757,#35758,#35759,#35760),(#35761,#35762,#35763,
#35764,#35765,#35766,#35767,#35768,#35769,#35770,#35771,#35772,#35773,#35774,
#35775,#35776,#35777),(#35778,#35779,#35780,#35781,#35782,#35783,#35784,
#35785,#35786,#35787,#35788,#35789,#35790,#35791,#35792,#35793,#35794)),
 .UNSPECIFIED.,.F.,.F.,.F.,(4,3,1,1,1,3,4),(4,1,1,1,1,1,1,1,1,1,1,1,1,1,
4),(-0.01,0.,0.285714285714286,0.571428571428571,0.785714285714286,1.,1.0101),
(0.0267091305739391,0.780566707095643,1.53442428361735,2.28828186013905,
3.04213943666075,3.54471115434189,4.54985458970416,5.0524263073853,6.05756974274757,
6.56014146042871,7.56528489579098,8.06785661347211,9.07300004883439,9.82685762535609,
10.5807152018778),.UNSPECIFIED.);
#173=B_SPLINE_SURFACE_WITH_KNOTS('',3,3,((#35883,#35884,#35885,#35886,#35887,
#35888,#35889,#35890,#35891,#35892,#35893,#35894,#35895,#35896,#35897,#35898,
#35899,#35900,#35901,#35902,#35903,#35904,#35905,#35906,#35907,#35908,#35909,
#35910,#35911,#35912,#35913,#35914,#35915,#35916,#35917,#35918,#35919,#35920,
#35921,#35922,#35923,#35924,#35925,#35926,#35927,#35928,#35929,#35930,#35931,
#35932,#35933,#35934,#35935,#35936,#35937,#35938,#35939,#35940,#35941,#35942,
#35943,#35944,#35945,#35946,#35947,#35948,#35949,#35950,#35951,#35952,#35953,
#35954,#35955,#35956,#35957,#35958,#35959,#35960,#35961,#35962,#35963,#35964,
#35965),(#35966,#35967,#35968,#35969,#35970,#35971,#35972,#35973,#35974,
#35975,#35976,#35977,#35978,#35979,#35980,#35981,#35982,#35983,#35984,#35985,
#35986,#35987,#35988,#35989,#35990,#35991,#35992,#35993,#35994,#35995,#35996,
#35997,#35998,#35999,#36000,#36001,#36002,#36003,#36004,#36005,#36006,#36007,
#36008,#36009,#36010,#36011,#36012,#36013,#36014,#36015,#36016,#36017,#36018,
#36019,#36020,#36021,#36022,#36023,#36024,#36025,#36026,#36027,#36028,#36029,
#36030,#36031,#36032,#36033,#36034,#36035,#36036,#36037,#36038,#36039,#36040,
#36041,#36042,#36043,#36044,#36045,#36046,#36047,#36048),(#36049,#36050,
#36051,#36052,#36053,#36054,#36055,#36056,#36057,#36058,#36059,#36060,#36061,
#36062,#36063,#36064,#36065,#36066,#36067,#36068,#36069,#36070,#36071,#36072,
#36073,#36074,#36075,#36076,#36077,#36078,#36079,#36080,#36081,#36082,#36083,
#36084,#36085,#36086,#36087,#36088,#36089,#36090,#36091,#36092,#36093,#36094,
#36095,#36096,#36097,#36098,#36099,#36100,#36101,#36102,#36103,#36104,#36105,
#36106,#36107,#36108,#36109,#36110,#36111,#36112,#36113,#36114,#36115,#36116,
#36117,#36118,#36119,#36120,#36121,#36122,#36123,#36124,#36125,#36126,#36127,
#36128,#36129,#36130,#36131),(#36132,#36133,#36134,#36135,#36136,#36137,
#36138,#36139,#36140,#36141,#36142,#36143,#36144,#36145,#36146,#36147,#36148,
#36149,#36150,#36151,#36152,#36153,#36154,#36155,#36156,#36157,#36158,#36159,
#36160,#36161,#36162,#36163,#36164,#36165,#36166,#36167,#36168,#36169,#36170,
#36171,#36172,#36173,#36174,#36175,#36176,#36177,#36178,#36179,#36180,#36181,
#36182,#36183,#36184,#36185,#36186,#36187,#36188,#36189,#36190,#36191,#36192,
#36193,#36194,#36195,#36196,#36197,#36198,#36199,#36200,#36201,#36202,#36203,
#36204,#36205,#36206,#36207,#36208,#36209,#36210,#36211,#36212,#36213,#36214),
(#36215,#36216,#36217,#36218,#36219,#36220,#36221,#36222,#36223,#36224,
#36225,#36226,#36227,#36228,#36229,#36230,#36231,#36232,#36233,#36234,#36235,
#36236,#36237,#36238,#36239,#36240,#36241,#36242,#36243,#36244,#36245,#36246,
#36247,#36248,#36249,#36250,#36251,#36252,#36253,#36254,#36255,#36256,#36257,
#36258,#36259,#36260,#36261,#36262,#36263,#36264,#36265,#36266,#36267,#36268,
#36269,#36270,#36271,#36272,#36273,#36274,#36275,#36276,#36277,#36278,#36279,
#36280,#36281,#36282,#36283,#36284,#36285,#36286,#36287,#36288,#36289,#36290,
#36291,#36292,#36293,#36294,#36295,#36296,#36297),(#36298,#36299,#36300,
#36301,#36302,#36303,#36304,#36305,#36306,#36307,#36308,#36309,#36310,#36311,
#36312,#36313,#36314,#36315,#36316,#36317,#36318,#36319,#36320,#36321,#36322,
#36323,#36324,#36325,#36326,#36327,#36328,#36329,#36330,#36331,#36332,#36333,
#36334,#36335,#36336,#36337,#36338,#36339,#36340,#36341,#36342,#36343,#36344,
#36345,#36346,#36347,#36348,#36349,#36350,#36351,#36352,#36353,#36354,#36355,
#36356,#36357,#36358,#36359,#36360,#36361,#36362,#36363,#36364,#36365,#36366,
#36367,#36368,#36369,#36370,#36371,#36372,#36373,#36374,#36375,#36376,#36377,
#36378,#36379,#36380),(#36381,#36382,#36383,#36384,#36385,#36386,#36387,
#36388,#36389,#36390,#36391,#36392,#36393,#36394,#36395,#36396,#36397,#36398,
#36399,#36400,#36401,#36402,#36403,#36404,#36405,#36406,#36407,#36408,#36409,
#36410,#36411,#36412,#36413,#36414,#36415,#36416,#36417,#36418,#36419,#36420,
#36421,#36422,#36423,#36424,#36425,#36426,#36427,#36428,#36429,#36430,#36431,
#36432,#36433,#36434,#36435,#36436,#36437,#36438,#36439,#36440,#36441,#36442,
#36443,#36444,#36445,#36446,#36447,#36448,#36449,#36450,#36451,#36452,#36453,
#36454,#36455,#36456,#36457,#36458,#36459,#36460,#36461,#36462,#36463)),
 .UNSPECIFIED.,.F.,.F.,.F.,(4,3,4),(4,1,1,1,1,1,1,1,1,1,1,1,1,1,1,1,1,1,
1,1,1,1,1,1,1,1,1,1,1,1,1,1,1,1,1,1,1,1,1,1,1,1,1,1,1,1,1,1,1,1,1,1,1,1,
1,1,1,1,1,1,1,1,1,1,1,1,1,1,1,1,1,1,1,1,1,1,1,1,1,1,4),(-3.14159265358979,
-2.31918842711196,-2.31096438484718),(37.4480614519116,37.9436823521751,
38.4393032524387,38.9349241527022,39.4305450529657,39.9261659532292,40.4217868534927,
40.9174077537563,41.4130286540198,41.9086495542833,42.4042704545468,42.8998913548104,
43.3955122550739,43.8911331553374,44.3867540556009,44.8823749558644,45.377995856128,
45.8736167563915,46.369237656655,46.8648585569185,47.3604794571821,47.8561003574456,
48.3517212577091,48.8473421579726,49.3429630582362,49.8385839584997,50.3342048587632,
50.8298257590267,51.3254466592902,51.8210675595538,52.3166884598173,52.8123093600808,
53.3079302603443,53.8035511606079,54.2991720608714,54.7947929611349,55.2904138613984,
55.7860347616619,56.2816556619255,56.777276562189,57.2728974624525,57.768518362716,
58.2641392629795,58.7597601632431,59.2553810635066,59.7510019637701,60.2466228640336,
60.7422437642972,61.2378646645607,61.7334855648242,62.2291064650877,62.7247273653512,
63.2203482656148,63.7159691658783,64.2115900661418,64.7072109664053,65.2028318666689,
65.6984527669324,66.1940736671959,66.6896945674594,67.1853154677229,67.6809363679865,
68.17655726825,68.6721781685135,69.167799068777,69.6634199690406,70.1590408693041,
70.6546617695676,71.1502826698311,71.6459035700946,72.1415244703582,72.6371453706217,
73.1327662708852,73.6283871711487,74.1240080714123,74.6196289716758,75.1152498719393,
75.6108707722028,76.1064916724663,76.6021125727299,77.0977334729934),
 .UNSPECIFIED.);
#174=B_SPLINE_SURFACE_WITH_KNOTS('',3,3,((#36507,#36508,#36509,#36510,#36511,
#36512,#36513,#36514,#36515,#36516,#36517,#36518,#36519,#36520,#36521,#36522,
#36523,#36524,#36525,#36526,#36527,#36528,#36529,#36530,#36531,#36532,#36533,
#36534,#36535,#36536,#36537,#36538,#36539,#36540,#36541,#36542,#36543,#36544,
#36545,#36546,#36547,#36548,#36549,#36550,#36551,#36552,#36553,#36554,#36555,
#36556,#36557,#36558,#36559,#36560,#36561,#36562,#36563,#36564,#36565,#36566,
#36567,#36568,#36569,#36570,#36571,#36572,#36573,#36574,#36575,#36576,#36577,
#36578,#36579,#36580,#36581,#36582,#36583),(#36584,#36585,#36586,#36587,
#36588,#36589,#36590,#36591,#36592,#36593,#36594,#36595,#36596,#36597,#36598,
#36599,#36600,#36601,#36602,#36603,#36604,#36605,#36606,#36607,#36608,#36609,
#36610,#36611,#36612,#36613,#36614,#36615,#36616,#36617,#36618,#36619,#36620,
#36621,#36622,#36623,#36624,#36625,#36626,#36627,#36628,#36629,#36630,#36631,
#36632,#36633,#36634,#36635,#36636,#36637,#36638,#36639,#36640,#36641,#36642,
#36643,#36644,#36645,#36646,#36647,#36648,#36649,#36650,#36651,#36652,#36653,
#36654,#36655,#36656,#36657,#36658,#36659,#36660),(#36661,#36662,#36663,
#36664,#36665,#36666,#36667,#36668,#36669,#36670,#36671,#36672,#36673,#36674,
#36675,#36676,#36677,#36678,#36679,#36680,#36681,#36682,#36683,#36684,#36685,
#36686,#36687,#36688,#36689,#36690,#36691,#36692,#36693,#36694,#36695,#36696,
#36697,#36698,#36699,#36700,#36701,#36702,#36703,#36704,#36705,#36706,#36707,
#36708,#36709,#36710,#36711,#36712,#36713,#36714,#36715,#36716,#36717,#36718,
#36719,#36720,#36721,#36722,#36723,#36724,#36725,#36726,#36727,#36728,#36729,
#36730,#36731,#36732,#36733,#36734,#36735,#36736,#36737),(#36738,#36739,
#36740,#36741,#36742,#36743,#36744,#36745,#36746,#36747,#36748,#36749,#36750,
#36751,#36752,#36753,#36754,#36755,#36756,#36757,#36758,#36759,#36760,#36761,
#36762,#36763,#36764,#36765,#36766,#36767,#36768,#36769,#36770,#36771,#36772,
#36773,#36774,#36775,#36776,#36777,#36778,#36779,#36780,#36781,#36782,#36783,
#36784,#36785,#36786,#36787,#36788,#36789,#36790,#36791,#36792,#36793,#36794,
#36795,#36796,#36797,#36798,#36799,#36800,#36801,#36802,#36803,#36804,#36805,
#36806,#36807,#36808,#36809,#36810,#36811,#36812,#36813,#36814)),
 .UNSPECIFIED.,.F.,.F.,.F.,(4,4),(4,1,1,1,1,1,1,1,1,1,1,1,1,1,1,1,1,1,1,
1,1,1,1,1,1,1,1,1,1,1,1,1,1,1,1,1,1,1,1,1,1,1,1,1,1,1,1,1,1,1,1,1,1,1,1,
1,1,1,1,1,1,1,1,1,1,1,1,1,1,1,1,1,1,1,4),(2.31637354466821,3.14159265358981),
(38.8932311051627,39.3884369771038,39.8836428490449,40.378848720986,40.8740545929272,
41.3692604648683,41.8644663368094,42.3596722087506,42.8548780806917,43.3500839526328,
43.845289824574,44.3404956965151,44.8357015684562,45.3309074403974,45.8261133123385,
46.3213191842796,46.8165250562207,47.3117309281619,47.806936800103,48.3021426720441,
48.7973485439853,49.2925544159264,49.7877602878675,50.2829661598087,50.7781720317498,
51.2733779036909,51.7685837756321,52.2637896475732,52.7589955195143,53.2542013914554,
53.7494072633966,54.2446131353377,54.7398190072788,55.23502487922,55.7302307511611,
56.2254366231022,56.7206424950434,57.2158483669845,57.7110542389256,58.2062601108668,
58.7014659828079,59.196671854749,59.6918777266901,60.1870835986313,60.6822894705724,
61.1774953425135,61.6727012144547,62.1679070863958,62.6631129583369,63.1583188302781,
63.6535247022192,64.1487305741603,64.6439364461014,65.1391423180426,65.6343481899837,
66.1295540619248,66.624759933866,67.1199658058071,67.6151716777482,68.1103775496894,
68.6055834216305,69.1007892935716,69.5959951655128,70.0912010374539,70.586406909395,
71.0816127813361,71.5768186532773,72.0720245252184,72.5672303971595,73.0624362691007,
73.5576421410418,74.0528480129829,74.5480538849241,75.0432597568652,75.5384656288063),
 .UNSPECIFIED.);
#175=B_SPLINE_SURFACE_WITH_KNOTS('',3,3,((#36826,#36827,#36828,#36829,#36830,
#36831,#36832),(#36833,#36834,#36835,#36836,#36837,#36838,#36839),(#36840,
#36841,#36842,#36843,#36844,#36845,#36846),(#36847,#36848,#36849,#36850,
#36851,#36852,#36853),(#36854,#36855,#36856,#36857,#36858,#36859,#36860),
(#36861,#36862,#36863,#36864,#36865,#36866,#36867),(#36868,#36869,#36870,
#36871,#36872,#36873,#36874),(#36875,#36876,#36877,#36878,#36879,#36880,
#36881)),.UNSPECIFIED.,.F.,.F.,.F.,(4,3,1,4),(4,3,4),(-0.01,0.,0.571428571428571,
1.00010754216715),(-0.000107499900496062,0.54983822220214,0.555336604424161),
 .UNSPECIFIED.);
#176=B_SPLINE_SURFACE_WITH_KNOTS('',3,3,((#36919,#36920,#36921,#36922),
(#36923,#36924,#36925,#36926),(#36927,#36928,#36929,#36930),(#36931,#36932,
#36933,#36934),(#36935,#36936,#36937,#36938),(#36939,#36940,#36941,#36942),
(#36943,#36944,#36945,#36946)),.UNSPECIFIED.,.F.,.F.,.F.,(4,1,1,1,4),(4,
4),(0.,0.285714285714286,0.571428571428571,0.785714285714286,1.00005339619608),
(0.008663774918551,0.549891618398003),.UNSPECIFIED.);
#177=B_SPLINE_CURVE_WITH_KNOTS('',3,(#2140,#2141,#2142,#2143,#2144,#2145,
#2146,#2147,#2148,#2149,#2150,#2151),.UNSPECIFIED.,.F.,.F.,(4,2,2,2,2,4),
(9.99991468131345E-7,0.178521879149201,0.356608557168878,0.52399765078055,
0.610402540568472,0.696501657820704),.UNSPECIFIED.);
#178=B_SPLINE_CURVE_WITH_KNOTS('',3,(#2185,#2186,#2187,#2188,#2189,#2190,
#2191,#2192,#2193,#2194,#2195,#2196,#2197,#2198),.UNSPECIFIED.,.F.,.F.,
(4,2,2,2,2,2,4),(-2.55106080869231,-2.01892118916933,-1.61599060931136,
-1.24449170186374,-0.870199236125707,-0.490991706772874,-1.9252942337733E-5),
 .UNSPECIFIED.);
#179=B_SPLINE_CURVE_WITH_KNOTS('',3,(#2202,#2203,#2204,#2205,#2206,#2207,
#2208,#2209,#2210,#2211,#2212,#2213,#2214,#2215),.UNSPECIFIED.,.F.,.F.,
(4,2,2,2,2,2,4),(1.92529423378357E-5,0.490991706772874,0.870199236125707,
1.24449170186374,1.61599060931136,2.01892118916933,2.55106091572282),
 .UNSPECIFIED.);
#180=B_SPLINE_CURVE_WITH_KNOTS('',3,(#2230,#2231,#2232,#2233,#2234,#2235),
 .UNSPECIFIED.,.F.,.F.,(4,2,4),(1.00000000902025E-6,0.6133562793592,1.22667704224539),
 .UNSPECIFIED.);
#181=B_SPLINE_CURVE_WITH_KNOTS('',3,(#2241,#2242,#2243,#2244,#2245,#2246),
 .UNSPECIFIED.,.F.,.F.,(4,2,4),(9.999461869964E-7,0.0817912058906729,0.163581450519331),
 .UNSPECIFIED.);
#182=B_SPLINE_CURVE_WITH_KNOTS('',3,(#2247,#2248,#2249,#2250,#2251,#2252,
#2253,#2254,#2255,#2256,#2257,#2258,#2259,#2260,#2261,#2262,#2263,#2264),
 .UNSPECIFIED.,.F.,.F.,(4,2,2,2,2,2,2,2,4),(0.000102160180769317,0.143330865131921,
0.223581850590205,0.3321409124177,0.585628491043722,0.714698932701362,0.777498300189229,
0.843706413367433,1.17115160804914),.UNSPECIFIED.);
#183=B_SPLINE_CURVE_WITH_KNOTS('',3,(#2281,#2282,#2283,#2284,#2285,#2286,
#2287,#2288),.UNSPECIFIED.,.F.,.F.,(4,2,2,4),(-4.08518106334001,-3.39389856714327,
-2.66080614269327,-2.3375697155446),.UNSPECIFIED.);
#184=B_SPLINE_CURVE_WITH_KNOTS('',3,(#2289,#2290,#2291,#2292,#2293,#2294,
#2295,#2296),.UNSPECIFIED.,.F.,.F.,(4,2,2,4),(2.3375697155446,2.66080614269327,
3.39389856714327,4.08518106334001),.UNSPECIFIED.);
#185=B_SPLINE_CURVE_WITH_KNOTS('',3,(#2313,#2314,#2315,#2316,#2317,#2318,
#2319,#2320),.UNSPECIFIED.,.F.,.F.,(4,2,2,4),(0.000109575310407527,0.277922278910497,
0.450393824524418,0.555734913729763),.UNSPECIFIED.);
#186=B_SPLINE_CURVE_WITH_KNOTS('',3,(#2321,#2322,#2323,#2324,#2325,#2326),
 .UNSPECIFIED.,.F.,.F.,(4,2,4),(1.0000000052468E-6,0.277367536813446,0.554734201588615),
 .UNSPECIFIED.);
#187=B_SPLINE_CURVE_WITH_KNOTS('',3,(#3372,#3373,#3374,#3375,#3376,#3377,
#3378,#3379,#3380,#3381,#3382,#3383,#3384,#3385,#3386,#3387,#3388,#3389,
#3390,#3391,#3392,#3393,#3394,#3395,#3396,#3397,#3398,#3399,#3400,#3401,
#3402,#3403,#3404,#3405,#3406,#3407,#3408,#3409,#3410,#3411,#3412,#3413,
#3414,#3415,#3416,#3417,#3418,#3419,#3420,#3421,#3422,#3423,#3424,#3425,
#3426,#3427,#3428,#3429,#3430,#3431,#3432,#3433,#3434,#3435,#3436,#3437,
#3438,#3439,#3440,#3441,#3442,#3443,#3444,#3445,#3446,#3447,#3448,#3449,
#3450,#3451,#3452,#3453,#3454,#3455,#3456,#3457,#3458,#3459,#3460,#3461,
#3462,#3463,#3464,#3465,#3466,#3467,#3468,#3469,#3470,#3471,#3472,#3473,
#3474,#3475,#3476,#3477,#3478,#3479,#3480,#3481,#3482,#3483),
 .UNSPECIFIED.,.F.,.F.,(4,3,3,3,3,3,3,3,3,3,3,3,3,3,3,3,3,3,3,3,3,3,3,3,
3,3,3,3,3,3,3,3,3,3,3,3,3,4),(0.337555189523445,0.352045509079284,0.356205523153446,
0.366866238784295,0.376307161548149,0.376307192800959,0.388432906782468,
0.393746494086325,0.396236578765389,0.40937901277462,0.414317925715331,
0.432412941017055,0.44496632522669,0.450464359577583,0.454294492847725,
0.465847277110824,0.477126075294484,0.48783174946003,0.493288128921196,
0.493288142871108,0.505283592500258,0.517396136182398,0.521844921166097,
0.535266711189999,0.550057887420178,0.564808790993423,0.567092169990695,
0.571275476920983,0.576243083340992,0.583287714547126,0.59525860037587,
0.598374110232669,0.604647789771572,0.610269092941258,0.623798532096234,
0.628523721468313,0.647103344766492,0.649870657149445),.UNSPECIFIED.);
#188=B_SPLINE_CURVE_WITH_KNOTS('',3,(#3485,#3486,#3487,#3488,#3489,#3490,
#3491,#3492,#3493,#3494,#3495,#3496,#3497,#3498,#3499,#3500),
 .UNSPECIFIED.,.F.,.F.,(4,3,3,3,3,4),(0.00746522138447157,0.00761943720002994,
0.289324154206927,0.571028871213823,0.681670454833815,0.738688496285837),
 .UNSPECIFIED.);
#189=B_SPLINE_CURVE_WITH_KNOTS('',3,(#3502,#3503,#3504,#3505,#3506,#3507,
#3508,#3509,#3510,#3511,#3512,#3513,#3514,#3515,#3516,#3517,#3518,#3519,
#3520,#3521,#3522,#3523,#3524,#3525,#3526,#3527,#3528,#3529,#3530,#3531,
#3532,#3533,#3534,#3535,#3536,#3537,#3538,#3539,#3540,#3541,#3542,#3543,
#3544,#3545,#3546,#3547,#3548,#3549,#3550,#3551,#3552,#3553,#3554,#3555,
#3556,#3557,#3558,#3559,#3560,#3561,#3562,#3563,#3564,#3565,#3566,#3567,
#3568,#3569,#3570,#3571,#3572,#3573,#3574,#3575,#3576,#3577,#3578,#3579,
#3580,#3581,#3582,#3583,#3584,#3585,#3586,#3587,#3588,#3589,#3590,#3591,
#3592,#3593,#3594,#3595,#3596,#3597,#3598,#3599,#3600,#3601,#3602,#3603,
#3604,#3605,#3606,#3607,#3608,#3609,#3610,#3611,#3612,#3613,#3614,#3615,
#3616,#3617,#3618,#3619,#3620,#3621,#3622,#3623,#3624,#3625,#3626,#3627,
#3628,#3629,#3630,#3631,#3632,#3633,#3634,#3635,#3636,#3637,#3638,#3639,
#3640,#3641,#3642,#3643,#3644,#3645,#3646,#3647,#3648,#3649,#3650,#3651,
#3652,#3653,#3654,#3655,#3656,#3657,#3658,#3659,#3660,#3661,#3662,#3663,
#3664,#3665,#3666,#3667,#3668,#3669,#3670,#3671,#3672,#3673,#3674,#3675,
#3676,#3677,#3678,#3679,#3680),.UNSPECIFIED.,.F.,.F.,(4,2,1,2,2,2,2,2,2,
2,2,2,2,2,2,2,2,2,2,2,2,2,2,2,2,2,2,2,2,2,2,2,2,2,2,2,2,2,2,2,2,2,2,2,2,
2,2,2,2,2,2,2,2,2,2,2,2,2,2,2,2,2,2,2,2,2,2,2,2,2,2,2,2,2,2,2,2,2,2,2,2,
2,2,2,2,2,2,2,2,4),(0.0619424885802705,0.0624052097730322,0.0624630499221274,
0.062491969996675,0.0625208900712226,0.0626365703694131,0.062867930965794,
0.0629232626614209,0.0637933733513175,0.0651115662629022,0.0656442581223646,
0.0669202842157082,0.0681656644536547,0.0693460276644588,0.0696473107871089,
0.0701285674957944,0.0713436557310097,0.0726082789585023,0.073047797206553,
0.0742447060847489,0.0754251725937496,0.0765843740580593,0.0767495667486472,
0.077878878217109,0.0782061909925897,0.0793287636416656,0.0804513362907414,
0.0815476672161485,0.0826257693024132,0.082774898967538,0.0829568969201853,
0.08389064840946,0.0841531058328356,0.0852032674944768,0.0862433563633134,
0.0872690296474961,0.0878548753749298,0.0888570203226327,0.0889871960772443,
0.0899749325516647,0.090949865089572,0.091556644917024,0.0925584944061644,
0.0928455790426458,0.0931722791480769,0.0936785955943398,0.0946809507122739,
0.0952584144591182,0.0961973815574485,0.0971254901899726,0.0979603039883525,
0.0988762216830685,0.0989601840012124,0.0998950357188955,0.100818030095861,
0.101255477187741,0.101334763120738,0.101986517483467,0.102661953543307,
0.103544813969676,0.104422601450146,0.10529323463353,0.105733096299901,
0.106363723085401,0.107247669628019,0.10812136401318,0.108639313325526,
0.108813477149234,0.109333303468655,0.110065492627495,0.110901145471527,
0.111732604904223,0.112558597840812,0.112701642794313,0.113521725364319,
0.113767262169589,0.114574584158559,0.115374709957732,0.115574560065989,
0.115618146940636,0.115830678324322,0.115991105024595,0.116733190228343,
0.116818036215851,0.117469031711683,0.118279520520818,0.119090009329952,
0.119874416413183,0.1206535240547,0.121170801253778),.UNSPECIFIED.);
#190=B_SPLINE_CURVE_WITH_KNOTS('',3,(#3903,#3904,#3905,#3906,#3907,#3908,
#3909,#3910,#3911,#3912,#3913,#3914,#3915,#3916,#3917,#3918),
 .UNSPECIFIED.,.F.,.F.,(4,3,3,3,3,4),(0.00986237646937896,0.00994171436761506,
0.122454124636361,0.21986699211333,0.249513949009007,0.299963131929986),
 .UNSPECIFIED.);
#191=B_SPLINE_CURVE_WITH_KNOTS('',3,(#4141,#4142,#4143,#4144,#4145,#4146,
#4147,#4148,#4149,#4150,#4151,#4152,#4153,#4154,#4155,#4156,#4157,#4158,
#4159,#4160,#4161,#4162,#4163,#4164,#4165,#4166,#4167,#4168,#4169,#4170,
#4171,#4172,#4173,#4174,#4175,#4176),.UNSPECIFIED.,.F.,.F.,(4,2,2,2,2,2,
2,2,2,2,2,2,2,2,2,2,2,4),(0.193716372924832,0.25,0.256016527061526,0.313115392280825,
0.371043790177453,0.429481628262425,0.488662314260629,0.5,0.53262795408055,
0.592171573279777,0.652309246250157,0.71340540590745,0.75,0.757055508297153,
0.819683368981094,0.882907690458723,0.947155078421966,1.),.UNSPECIFIED.);
#192=B_SPLINE_CURVE_WITH_KNOTS('',3,(#4178,#4179,#4180,#4181,#4182,#4183,
#4184,#4185,#4186,#4187,#4188,#4189,#4190,#4191,#4192,#4193),
 .UNSPECIFIED.,.F.,.F.,(4,3,3,3,3,4),(2.79469913386397E-7,0.249999999999993,
0.37499999999999,0.499999999999987,0.760268339461371,0.999999870531944),
 .UNSPECIFIED.);
#193=B_SPLINE_CURVE_WITH_KNOTS('',3,(#4194,#4195,#4196,#4197,#4198,#4199,
#4200,#4201,#4202,#4203,#4204,#4205,#4206,#4207,#4208,#4209,#4210,#4211,
#4212,#4213),.UNSPECIFIED.,.F.,.F.,(4,2,2,2,2,2,2,2,2,4),(8.40480626580868E-8,
0.0421943986904307,0.0843887973808613,0.126583196071292,0.168777594761723,
0.210971993452153,0.253166392142584,0.295360790833014,0.31645799017823,
0.337555177098193),.UNSPECIFIED.);
#194=B_SPLINE_CURVE_WITH_KNOTS('',3,(#4278,#4279,#4280,#4281,#4282,#4283,
#4284,#4285,#4286,#4287,#4288,#4289,#4290,#4291,#4292,#4293,#4294,#4295,
#4296,#4297,#4298,#4299,#4300,#4301,#4302,#4303,#4304,#4305,#4306,#4307,
#4308,#4309,#4310,#4311,#4312,#4313,#4314,#4315,#4316,#4317,#4318,#4319,
#4320,#4321,#4322,#4323,#4324,#4325,#4326,#4327,#4328,#4329,#4330,#4331,
#4332,#4333,#4334,#4335,#4336,#4337,#4338,#4339,#4340,#4341,#4342,#4343,
#4344,#4345,#4346,#4347,#4348,#4349,#4350,#4351,#4352,#4353,#4354,#4355,
#4356,#4357,#4358,#4359,#4360,#4361,#4362,#4363,#4364,#4365,#4366,#4367,
#4368,#4369,#4370,#4371,#4372,#4373,#4374,#4375,#4376,#4377,#4378,#4379,
#4380,#4381,#4382,#4383,#4384,#4385,#4386,#4387,#4388,#4389,#4390,#4391,
#4392,#4393,#4394,#4395,#4396,#4397),.UNSPECIFIED.,.F.,.F.,(4,2,2,2,2,2,
2,2,2,2,2,2,2,2,2,2,2,2,2,2,2,2,2,2,2,2,2,2,2,2,2,2,2,2,2,2,2,2,2,2,2,2,
2,2,2,2,2,2,2,2,2,2,2,2,2,2,2,2,2,4),(0.0817499781622737,0.0835740889741481,
0.0854047877718427,0.0872384354929278,0.0890700380178905,0.0908932059157444,
0.0919767264430084,0.0920725950298541,0.0938668428924977,0.0945334135131921,
0.0956064763057493,0.0966804832742636,0.0970901005833758,0.098899902688301,
0.10071809253333,0.102203474723743,0.102338964010475,0.104162426113992,
0.105987629682334,0.107808335816387,0.109622906947762,0.111423410416899,
0.112430223004478,0.11264093179446,0.113813920934561,0.114986910074662,
0.116786866932779,0.117543597144845,0.119375313954527,0.121209211934933,
0.122656971285213,0.122934130894679,0.124760613673272,0.12658204829356,
0.12777034542558,0.129545533564241,0.130327032495764,0.131834526587056,
0.132883719565947,0.133204313808188,0.135020537011788,0.13684541348168,
0.138676572826416,0.140507694751379,0.142333664003464,0.143110467846682,
0.143525418396979,0.145563977224998,0.147585235701334,0.148223841987049,
0.150020808535938,0.15182753431893,0.153337216127416,0.153781555151052,
0.155601635683668,0.157423875819681,0.15924239606509,0.161055208747811,
0.162855147017239,0.163563964408151),.UNSPECIFIED.);
#195=B_SPLINE_CURVE_WITH_KNOTS('',3,(#4459,#4460,#4461,#4462,#4463,#4464,
#4465,#4466,#4467,#4468,#4469,#4470,#4471,#4472,#4473,#4474,#4475,#4476,
#4477,#4478,#4479,#4480,#4481,#4482,#4483,#4484,#4485,#4486,#4487,#4488,
#4489,#4490,#4491,#4492,#4493,#4494,#4495,#4496,#4497,#4498,#4499,#4500,
#4501,#4502,#4503,#4504,#4505,#4506,#4507,#4508,#4509,#4510,#4511,#4512,
#4513,#4514,#4515,#4516,#4517,#4518,#4519,#4520,#4521,#4522,#4523,#4524,
#4525,#4526,#4527,#4528,#4529,#4530,#4531,#4532,#4533,#4534,#4535,#4536,
#4537,#4538,#4539,#4540,#4541,#4542,#4543,#4544,#4545,#4546,#4547,#4548,
#4549,#4550,#4551,#4552,#4553,#4554,#4555,#4556,#4557,#4558,#4559,#4560,
#4561,#4562,#4563,#4564,#4565,#4566,#4567,#4568,#4569,#4570,#4571,#4572,
#4573,#4574,#4575,#4576,#4577,#4578),.UNSPECIFIED.,.F.,.F.,(4,2,2,2,2,2,
2,2,2,2,2,2,2,2,2,2,2,2,2,2,2,2,2,2,2,2,2,2,2,2,2,2,2,2,2,2,2,2,2,2,2,2,
2,2,2,2,2,2,2,2,2,2,2,2,2,2,2,2,2,4),(0.0817499781622737,0.0835740889741473,
0.0854047877718528,0.0872384354929303,0.0890700380179041,0.0908932059158084,
0.0919767264430084,0.0920725950298541,0.0938668428924977,0.0945334135131921,
0.0956064763057495,0.0966804832742712,0.0970901005833758,0.0988999026883012,
0.100718092533322,0.102203474723743,0.102338964010475,0.104162426113992,
0.105987629682334,0.107808335816387,0.109622906947762,0.111423410416899,
0.112430223004478,0.11264093179446,0.113813920934561,0.114986910074662,
0.116786866932779,0.117543597144845,0.119375313954527,0.121209211934933,
0.122656971285213,0.122934130894679,0.124760613673272,0.12658204829356,
0.12777034542558,0.129545533564241,0.130327032495764,0.131834526587056,
0.132883719565947,0.133204313808188,0.135020537011788,0.13684541348168,
0.138676572826416,0.140507694751379,0.142333664003464,0.143110467846682,
0.143525418396979,0.145563977224998,0.147585235701334,0.148223841987049,
0.150020808535938,0.15182753431893,0.153337216127416,0.153781555151052,
0.155601635683668,0.157423875819681,0.15924239606509,0.161055208747811,
0.162855147017239,0.163563964408151),.UNSPECIFIED.);
#196=B_SPLINE_CURVE_WITH_KNOTS('',3,(#4670,#4671,#4672,#4673,#4674,#4675),
 .UNSPECIFIED.,.F.,.F.,(4,2,4),(-1.06086094825798,-0.530470691807047,-8.03152923547858E-5),
 .UNSPECIFIED.);
#197=B_SPLINE_CURVE_WITH_KNOTS('',3,(#4677,#4678,#4679,#4680,#4681,#4682,
#4683,#4684,#4685,#4686,#4687,#4688,#4689,#4690),.UNSPECIFIED.,.F.,.F.,
(4,2,2,2,2,2,4),(8.06264207950935E-5,0.507977664246336,1.05427083764486,
1.79506211252344,2.17817707905117,2.74042272565602,3.23171091409501),
 .UNSPECIFIED.);
#198=B_SPLINE_CURVE_WITH_KNOTS('',3,(#4692,#4693,#4694,#4695,#4696,#4697,
#4698,#4699,#4700,#4701),.UNSPECIFIED.,.F.,.F.,(4,2,2,2,4),(5.02679787368621E-5,
0.441554287227467,0.859732702312481,1.30698965565461,1.71941566131369),
 .UNSPECIFIED.);
#199=B_SPLINE_CURVE_WITH_KNOTS('',3,(#4703,#4704,#4705,#4706,#4707,#4708),
 .UNSPECIFIED.,.F.,.F.,(4,2,4),(-1.15991170695747,-0.577866245419517,-9.99999999621368E-7),
 .UNSPECIFIED.);
#200=B_SPLINE_CURVE_WITH_KNOTS('',3,(#4710,#4711,#4712,#4713),
 .UNSPECIFIED.,.F.,.F.,(4,4),(0.000233981156855546,0.998742124889019),
 .UNSPECIFIED.);
#201=B_SPLINE_CURVE_WITH_KNOTS('',3,(#4714,#4715,#4716,#4717,#4718,#4719,
#4720,#4721,#4722,#4723,#4724,#4725,#4726,#4727,#4728,#4729,#4730,#4731),
 .UNSPECIFIED.,.F.,.F.,(4,2,2,2,2,2,2,2,4),(-14.4857708284692,-12.5226098095914,
-10.5245680392311,-8.23768894294985,-5.77612726250257,-3.14707765963791,
-1.34636871223775,-0.912835489652579,-1.00000026037605E-6),
 .UNSPECIFIED.);
#202=B_SPLINE_CURVE_WITH_KNOTS('',3,(#4736,#4737,#4738,#4739,#4740,#4741,
#4742,#4743,#4744,#4745,#4746,#4747,#4748,#4749,#4750,#4751,#4752,#4753,
#4754,#4755,#4756,#4757,#4758,#4759,#4760,#4761,#4762,#4763,#4764,#4765,
#4766,#4767,#4768,#4769,#4770,#4771,#4772,#4773,#4774,#4775,#4776,#4777,
#4778,#4779,#4780,#4781,#4782,#4783,#4784,#4785,#4786,#4787,#4788,#4789,
#4790,#4791,#4792,#4793,#4794,#4795,#4796,#4797,#4798,#4799,#4800,#4801,
#4802,#4803,#4804,#4805,#4806,#4807,#4808,#4809,#4810,#4811,#4812,#4813,
#4814,#4815,#4816,#4817,#4818,#4819,#4820,#4821,#4822,#4823,#4824,#4825,
#4826,#4827,#4828,#4829,#4830,#4831,#4832,#4833,#4834,#4835,#4836,#4837,
#4838,#4839,#4840,#4841,#4842,#4843,#4844,#4845,#4846,#4847,#4848,#4849,
#4850,#4851,#4852,#4853,#4854,#4855,#4856,#4857,#4858,#4859,#4860,#4861,
#4862,#4863),.UNSPECIFIED.,.F.,.F.,(4,2,2,2,2,2,2,2,2,2,2,2,2,2,2,2,2,2,
2,2,2,2,2,2,2,2,2,2,2,2,2,2,2,2,2,2,2,2,2,2,2,2,2,2,2,2,2,2,2,2,2,2,2,2,
2,2,2,2,2,2,2,2,2,4),(0.,0.00333401256855093,0.00510937363514211,0.00656144533471486,
0.00801279022683359,0.00946321696016695,0.00971759803958797,0.0102187472702842,
0.0120365315258108,0.0138626437963805,0.0156944927778719,0.0175260042238425,
0.0193520329751366,0.0200364761766238,0.0204374945405684,0.0222470648034777,
0.0229921813581395,0.024269524766925,0.0255468681757105,0.0273417215992113,
0.0291470169685848,0.0302985072621436,0.0306562418108527,0.0324820740141183,
0.0343117210642505,0.036140033414452,0.0379639274224769,0.0397764209475802,
0.040616644353964,0.0408749890811369,0.041966559006649,0.0430584202197449,
0.0434296758987079,0.0452130557021232,0.045984362716279,0.0478090089793349,
0.0496383853218851,0.0508914063955731,0.0510937363514211,0.0529260960406175,
0.054756182599311,0.0562031099865631,0.0579962127077343,0.0587577968041342,
0.0598048637917055,0.0608503876933486,0.0611771704671424,0.0613124836217052,
0.0631172322438034,0.0649327927429031,0.0667583093979884,0.068585886798475,
0.0704111894415294,0.0714861095127296,0.0715312308919895,0.0733464775108079,
0.0751533532458222,0.0766406045271316,0.0776817396974757,0.0786987993136752,
0.0790948620977381,0.0793435443041582,0.0811467515088491,0.0817499781622737),
 .UNSPECIFIED.);
#203=B_SPLINE_CURVE_WITH_KNOTS('',3,(#4864,#4865,#4866,#4867,#4868,#4869,
#4870,#4871,#4872,#4873,#4874,#4875,#4876,#4877,#4878,#4879,#4880,#4881,
#4882,#4883,#4884,#4885,#4886,#4887,#4888,#4889,#4890,#4891,#4892,#4893,
#4894,#4895,#4896,#4897,#4898,#4899,#4900,#4901,#4902,#4903,#4904,#4905,
#4906,#4907,#4908,#4909,#4910,#4911,#4912,#4913,#4914,#4915,#4916,#4917,
#4918,#4919,#4920,#4921,#4922,#4923,#4924,#4925,#4926,#4927,#4928,#4929,
#4930,#4931,#4932,#4933,#4934,#4935,#4936,#4937,#4938,#4939,#4940,#4941,
#4942,#4943,#4944,#4945,#4946,#4947,#4948,#4949,#4950,#4951,#4952,#4953,
#4954,#4955,#4956,#4957,#4958,#4959,#4960,#4961,#4962,#4963,#4964,#4965,
#4966,#4967,#4968,#4969,#4970,#4971,#4972,#4973,#4974,#4975,#4976,#4977,
#4978,#4979,#4980,#4981,#4982,#4983,#4984,#4985,#4986,#4987,#4988,#4989,
#4990,#4991),.UNSPECIFIED.,.F.,.F.,(4,2,2,2,2,2,2,2,2,2,2,2,2,2,2,2,2,2,
2,2,2,2,2,2,2,2,2,2,2,2,2,2,2,2,2,2,2,2,2,2,2,2,2,2,2,2,2,2,2,2,2,2,2,2,
2,2,2,2,2,2,2,2,2,4),(0.,0.00333401256855093,0.00510937363514211,0.00656144533471486,
0.00801279022683359,0.00946321696016695,0.00971759803958797,0.0102187472702842,
0.0120365315258108,0.0138626437963805,0.0156944927778719,0.0175260042238425,
0.0193520329751366,0.0200364761766238,0.0204374945405684,0.0222470648034777,
0.0229921813581395,0.024269524766925,0.0255468681757105,0.0273417215992113,
0.0291470169685848,0.0302985072621436,0.0306562418108527,0.0324820740141183,
0.0343117210642505,0.036140033414452,0.0379639274224769,0.0397764209475802,
0.040616644353964,0.0408749890811369,0.041966559006649,0.0430584202197449,
0.0434296758987079,0.0452130557021232,0.045984362716279,0.0478090089793349,
0.0496383853218851,0.0508914063955731,0.0510937363514211,0.0529260960406175,
0.054756182599311,0.0562031099865631,0.0579962127077343,0.0587577968041342,
0.0598048637917055,0.0608503876933486,0.0611771704671424,0.0613124836217052,
0.0631172322438034,0.0649327927429031,0.0667583093979884,0.068585886798475,
0.0704111894415294,0.0714861095127296,0.0715312308919895,0.0733464775108081,
0.0751533532458217,0.0766406045271316,0.0776817396974758,0.0786987993136753,
0.0790948620977383,0.0793435443041161,0.0811467515088068,0.0817499781622737),
 .UNSPECIFIED.);
#204=B_SPLINE_CURVE_WITH_KNOTS('',3,(#5574,#5575,#5576,#5577,#5578,#5579,
#5580,#5581,#5582),.UNSPECIFIED.,.F.,.F.,(4,1,1,1,1,1,4),(0.0262968069663537,
0.0338239578683192,0.0475272930177256,0.0612306281671292,0.0749339633165328,
0.0886372984659361,0.0893914224976164),.UNSPECIFIED.);
#205=B_SPLINE_CURVE_WITH_KNOTS('',3,(#5586,#5587,#5588,#5589,#5590,#5591,
#5592,#5593,#5594,#5595,#5596,#5597,#5598,#5599,#5600,#5601,#5602,#5603,
#5604,#5605,#5606,#5607,#5608,#5609,#5610,#5611,#5612,#5613,#5614,#5615,
#5616,#5617,#5618,#5619,#5620,#5621,#5622,#5623,#5624,#5625,#5626,#5627,
#5628,#5629,#5630,#5631,#5632,#5633,#5634,#5635,#5636,#5637,#5638,#5639,
#5640,#5641,#5642,#5643,#5644,#5645,#5646,#5647,#5648,#5649,#5650,#5651,
#5652,#5653,#5654,#5655,#5656,#5657,#5658,#5659,#5660,#5661,#5662,#5663,
#5664,#5665,#5666,#5667,#5668,#5669,#5670,#5671,#5672,#5673,#5674,#5675,
#5676,#5677,#5678,#5679,#5680,#5681,#5682,#5683,#5684,#5685,#5686,#5687,
#5688,#5689,#5690,#5691,#5692,#5693,#5694,#5695,#5696,#5697,#5698,#5699,
#5700,#5701,#5702,#5703,#5704,#5705,#5706,#5707,#5708,#5709,#5710,#5711,
#5712,#5713,#5714,#5715,#5716,#5717,#5718,#5719,#5720,#5721,#5722,#5723,
#5724,#5725,#5726,#5727,#5728,#5729,#5730,#5731,#5732,#5733,#5734,#5735,
#5736,#5737,#5738,#5739,#5740,#5741,#5742,#5743,#5744,#5745,#5746,#5747,
#5748,#5749,#5750,#5751,#5752,#5753,#5754,#5755,#5756,#5757,#5758,#5759,
#5760,#5761,#5762,#5763,#5764,#5765,#5766,#5767,#5768,#5769,#5770,#5771,
#5772,#5773,#5774,#5775,#5776,#5777,#5778,#5779,#5780,#5781,#5782,#5783,
#5784,#5785,#5786,#5787,#5788,#5789,#5790,#5791,#5792,#5793,#5794,#5795,
#5796,#5797,#5798,#5799,#5800,#5801,#5802,#5803,#5804,#5805,#5806,#5807,
#5808,#5809,#5810,#5811,#5812,#5813,#5814,#5815,#5816,#5817,#5818,#5819,
#5820,#5821,#5822,#5823,#5824,#5825,#5826,#5827,#5828,#5829,#5830,#5831,
#5832,#5833,#5834,#5835,#5836,#5837,#5838,#5839,#5840,#5841,#5842,#5843,
#5844,#5845,#5846,#5847,#5848,#5849,#5850,#5851,#5852,#5853,#5854,#5855,
#5856,#5857,#5858,#5859,#5860,#5861,#5862,#5863,#5864,#5865,#5866,#5867,
#5868,#5869,#5870,#5871,#5872,#5873,#5874),.UNSPECIFIED.,.F.,.F.,(4,3,3,
3,3,3,3,3,3,3,3,3,3,3,3,3,3,3,3,3,3,3,3,3,3,3,3,3,3,3,3,3,3,3,3,3,3,3,3,
3,3,3,3,3,3,3,3,3,3,3,3,3,3,3,3,3,3,3,3,3,3,3,3,3,3,3,3,3,3,3,3,3,3,3,3,
3,3,3,3,3,3,3,3,3,3,3,3,3,3,3,3,3,3,3,3,3,4),(0.869758879972692,0.870485529511164,
0.87174273422458,0.872326084240172,0.873204411153942,0.874010743955939,
0.874994472275451,0.875007931381628,0.875034849593981,0.875142522443396,
0.875357868142224,0.87578855953988,0.876279189641456,0.876649942335193,
0.87762156006683,0.877741119380814,0.877893417289874,0.8785990745829,0.879529467117326,
0.88037454491644,0.880509218393365,0.881388531987041,0.881493223428069,
0.881776845419772,0.88235731026443,0.882481563865445,0.883237085513008,
0.883474324260898,0.884331701128309,0.884473737920896,0.884973578636525,
0.885477127405143,0.886486286562064,0.88674890271836,0.887629545631461,
0.887758657010789,0.888652550036325,0.888699881621262,0.88877320728299,
0.889674790128257,0.889792654204671,0.890624729299052,0.89081710235921,
0.891849276664315,0.892503925257153,0.892885974387419,0.89392962054734,
0.894447135456001,0.895369526423335,0.895492073079654,0.896428696983679,
0.896515185345151,0.896542505759394,0.897488259059208,0.89759856110344,
0.898533179890133,0.898660372227054,0.899731350842899,0.90057652658319,
0.90080757194602,0.901892382016172,0.902734317841206,0.903706899491867,
0.903863864974645,0.904852072009353,0.904957835363852,0.905957010871255,
0.906058410984315,0.907091123522502,0.907165767981078,0.908316999712988,
0.909355627132719,0.909441940742435,0.910606317825576,0.911770694908716,
0.912804598023032,0.912905604571812,0.913956733233253,0.914052814062224,
0.914200054804373,0.915207989116714,0.916282262741119,0.916371373192318,
0.916490939845244,0.917543223506502,0.918728034030748,0.918992083962159,
0.919920693161589,0.921124912662511,0.921441847691446,0.921805826279696,
0.922920140181492,0.92301040400446,0.924144462207337,0.924227331539888,
0.924498515924789,0.924887365664511),.UNSPECIFIED.);
#206=B_SPLINE_CURVE_WITH_KNOTS('',3,(#6459,#6460,#6461,#6462,#6463,#6464,
#6465,#6466,#6467,#6468),.UNSPECIFIED.,.F.,.F.,(4,1,1,1,1,1,1,4),(0.176252925143551,
0.184560644511767,0.198263979661171,0.211967314810574,0.22567064995998,
0.239373985109384,0.253077320258788,0.263113167894235),.UNSPECIFIED.);
#207=B_SPLINE_CURVE_WITH_KNOTS('',3,(#6472,#6473,#6474,#6475,#6476,#6477,
#6478,#6479,#6480,#6481,#6482,#6483,#6484,#6485,#6486,#6487,#6488,#6489,
#6490,#6491,#6492,#6493,#6494,#6495,#6496,#6497,#6498,#6499,#6500,#6501,
#6502,#6503,#6504,#6505,#6506,#6507,#6508,#6509,#6510,#6511,#6512,#6513,
#6514,#6515,#6516,#6517,#6518,#6519,#6520,#6521,#6522,#6523,#6524,#6525,
#6526,#6527,#6528,#6529,#6530,#6531,#6532,#6533,#6534,#6535,#6536,#6537,
#6538,#6539,#6540,#6541,#6542,#6543,#6544,#6545,#6546,#6547,#6548,#6549,
#6550,#6551,#6552,#6553,#6554,#6555,#6556,#6557,#6558,#6559,#6560,#6561,
#6562,#6563,#6564,#6565,#6566,#6567,#6568,#6569,#6570,#6571,#6572,#6573,
#6574,#6575,#6576,#6577,#6578,#6579,#6580,#6581,#6582,#6583,#6584,#6585,
#6586,#6587,#6588,#6589,#6590,#6591,#6592,#6593,#6594,#6595,#6596,#6597,
#6598,#6599,#6600,#6601,#6602,#6603,#6604,#6605,#6606,#6607,#6608,#6609,
#6610,#6611,#6612,#6613,#6614,#6615,#6616,#6617,#6618,#6619,#6620,#6621,
#6622,#6623,#6624,#6625,#6626,#6627,#6628,#6629,#6630,#6631,#6632,#6633,
#6634,#6635,#6636,#6637,#6638,#6639,#6640,#6641,#6642,#6643,#6644,#6645,
#6646,#6647,#6648,#6649,#6650,#6651,#6652,#6653,#6654,#6655,#6656,#6657,
#6658,#6659,#6660,#6661,#6662,#6663,#6664,#6665,#6666,#6667,#6668,#6669,
#6670,#6671,#6672,#6673,#6674,#6675,#6676,#6677,#6678,#6679,#6680,#6681,
#6682,#6683,#6684,#6685,#6686,#6687,#6688,#6689,#6690,#6691,#6692,#6693,
#6694,#6695,#6696,#6697,#6698,#6699,#6700,#6701,#6702,#6703,#6704,#6705,
#6706,#6707,#6708,#6709,#6710,#6711,#6712,#6713,#6714,#6715,#6716,#6717,
#6718,#6719,#6720,#6721,#6722,#6723,#6724,#6725,#6726,#6727,#6728,#6729,
#6730,#6731,#6732,#6733,#6734,#6735,#6736),.UNSPECIFIED.,.F.,.F.,(4,3,3,
3,3,3,3,3,3,3,3,3,3,3,3,3,3,3,3,3,3,3,3,3,3,3,3,3,3,3,3,3,3,3,3,3,3,3,3,
3,3,3,3,3,3,3,3,3,3,3,3,3,3,3,3,3,3,3,3,3,3,3,3,3,3,3,3,3,3,3,3,3,3,3,3,
3,3,3,3,3,3,3,3,3,3,3,3,3,4),(0.688131641343864,0.689314761032212,0.691834722800922,
0.693703748566986,0.693815059752015,0.694120845421919,0.696106555812941,
0.696674755655829,0.69863693361841,0.699183632579121,0.699762082259108,
0.700372021087102,0.702519138655622,0.704665231895891,0.705880262682915,
0.705898059096363,0.708072544362309,0.710247029628255,0.712132533021868,
0.712407997856653,0.712612402985762,0.713150427439269,0.713269980252118,
0.71542368234468,0.71582038285116,0.71632905321176,0.717904568643915,0.718501370276731,
0.718732593935092,0.720891091454745,0.721768770571069,0.723273035397935,
0.72394144221912,0.724852784884422,0.725348389623133,0.727220457227321,
0.729439561284607,0.730104151479239,0.730463310447744,0.730972975833752,
0.731595890171908,0.733395878387619,0.733808128418899,0.735880309267277,
0.736243644713635,0.737093166783082,0.739511491583955,0.740143198813981,
0.742674365642018,0.74518823561924,0.747311311037597,0.747622078154452,
0.748683102587221,0.749333548681742,0.749716060616075,0.749979037570929,
0.750002944566825,0.750863596419075,0.751638578210679,0.752393644156408,
0.754458222700427,0.755389356921028,0.755453739631073,0.755693919901954,
0.757957144087623,0.759715314255479,0.761199132073145,0.761573930580403,
0.76234395623894,0.764354189229626,0.764605166349366,0.764843846734766,
0.766864582555132,0.767483771584202,0.767694121529734,0.768861764455666,
0.770973221850162,0.772800952370778,0.773194040502824,0.773814312479065,
0.775581554772174,0.777629151819457,0.778049115879405,0.779670515743867,
0.779934503428395,0.781976400104079,0.784016719948897,0.785886619524499,
0.786054694377726),.UNSPECIFIED.);
#208=B_SPLINE_CURVE_WITH_KNOTS('',3,(#6737,#6738,#6739,#6740,#6741,#6742,
#6743,#6744,#6745,#6746),.UNSPECIFIED.,.F.,.F.,(4,3,3,4),(0.00991384614434246,
0.43189499554289,0.84033809412046,0.999999891452913),.UNSPECIFIED.);
#209=B_SPLINE_CURVE_WITH_KNOTS('',3,(#7330,#7331,#7332,#7333,#7334,#7335,
#7336,#7337,#7338,#7339),.UNSPECIFIED.,.F.,.F.,(4,1,1,1,1,1,1,4),(0.349975519155613,
0.362704001454022,0.376407336603426,0.390110671752829,0.403814006902233,
0.417517342051639,0.431220677201043,0.436836897889921),.UNSPECIFIED.);
#210=B_SPLINE_CURVE_WITH_KNOTS('',3,(#7343,#7344,#7345,#7346,#7347,#7348,
#7349,#7350,#7351,#7352,#7353,#7354,#7355,#7356,#7357,#7358,#7359,#7360,
#7361,#7362,#7363,#7364,#7365,#7366,#7367,#7368,#7369,#7370,#7371,#7372,
#7373,#7374,#7375,#7376,#7377,#7378,#7379,#7380,#7381,#7382,#7383,#7384,
#7385,#7386,#7387,#7388,#7389,#7390,#7391,#7392,#7393,#7394,#7395,#7396,
#7397,#7398,#7399,#7400,#7401,#7402,#7403,#7404,#7405,#7406,#7407,#7408,
#7409,#7410,#7411,#7412,#7413,#7414,#7415,#7416,#7417,#7418,#7419,#7420,
#7421,#7422,#7423,#7424,#7425,#7426,#7427,#7428,#7429,#7430,#7431,#7432,
#7433,#7434,#7435,#7436,#7437,#7438,#7439,#7440,#7441,#7442,#7443,#7444,
#7445,#7446,#7447,#7448,#7449,#7450,#7451,#7452,#7453,#7454,#7455,#7456,
#7457,#7458,#7459,#7460,#7461,#7462,#7463,#7464,#7465,#7466,#7467,#7468,
#7469,#7470,#7471,#7472,#7473,#7474,#7475,#7476,#7477,#7478,#7479,#7480,
#7481,#7482,#7483,#7484,#7485,#7486,#7487,#7488,#7489,#7490,#7491,#7492,
#7493,#7494,#7495,#7496,#7497,#7498,#7499,#7500,#7501,#7502,#7503,#7504,
#7505,#7506,#7507,#7508,#7509,#7510,#7511,#7512,#7513,#7514,#7515,#7516,
#7517,#7518,#7519,#7520,#7521,#7522,#7523,#7524,#7525,#7526,#7527,#7528,
#7529,#7530,#7531,#7532,#7533,#7534,#7535,#7536,#7537,#7538,#7539,#7540,
#7541,#7542,#7543,#7544,#7545,#7546,#7547,#7548,#7549,#7550,#7551,#7552,
#7553,#7554,#7555,#7556,#7557,#7558,#7559,#7560,#7561,#7562,#7563,#7564,
#7565,#7566,#7567,#7568,#7569,#7570,#7571,#7572,#7573,#7574,#7575,#7576,
#7577,#7578,#7579,#7580,#7581,#7582,#7583,#7584,#7585,#7586,#7587,#7588,
#7589,#7590,#7591,#7592),.UNSPECIFIED.,.F.,.F.,(4,3,3,3,3,3,3,3,3,3,3,3,
3,3,3,3,3,3,3,3,3,3,3,3,3,3,3,3,3,3,3,3,3,3,3,3,3,3,3,3,3,3,3,3,3,3,3,3,
3,3,3,3,3,3,3,3,3,3,3,3,3,3,3,3,3,3,3,3,3,3,3,3,3,3,3,3,3,3,3,3,3,3,3,4),
(0.52747373645237,0.529051899150639,0.529348197975988,0.529435257833407,
0.530564394046863,0.5313924974335,0.531863323978385,0.532025538673434,0.53360608781721,
0.533943885521644,0.535560235168097,0.535866247278542,0.53595990248878,
0.537580720173749,0.537794740342584,0.539385887203904,0.539726754354958,
0.539904520314142,0.540068594461336,0.541366018512635,0.54166416923641,
0.54273816933098,0.544334135496638,0.544677301489387,0.546311284931168,
0.546620625134916,0.546881825500972,0.548570443303932,0.550185751821946,
0.550523940821989,0.550621591883138,0.551026788261882,0.552404121832281,
0.552483268734774,0.553859128838841,0.555476562952053,0.555820601155685,
0.557475802537767,0.557786461475885,0.558053280608171,0.559759167190085,
0.561396775992036,0.561735728378134,0.562239317253216,0.563700589472416,
0.563718489200773,0.565243709209933,0.566884526428944,0.56722887053272,
0.568907193520251,0.569218635687249,0.569492364153245,0.57121563478217,
0.572877660199052,0.573216683128856,0.573724759070001,0.575224343464149,
0.575275249253402,0.576911596871333,0.578577887114259,0.578921950043819,
0.580625478922553,0.580937145191598,0.581219387192975,0.582960006740632,
0.584648765463279,0.584987131768959,0.585504068218745,0.587021331848439,
0.587149881046162,0.588885057715627,0.590579105520055,0.590921201093641,
0.591198971190522,0.592937987390709,0.593255354360965,0.594200353951658,
0.594740549599617,0.596470122441034,0.59680899019355,0.597601068502203,
0.598885966962483,0.599728031354459,0.600302570023387),.UNSPECIFIED.);
#211=B_SPLINE_CURVE_WITH_KNOTS('',3,(#7593,#7594,#7595,#7596,#7597,#7598,
#7599,#7600,#7601,#7602),.UNSPECIFIED.,.F.,.F.,(4,3,3,4),(0.00952418931300581,
0.00990099008476424,0.79818523923233,0.999999995607544),.UNSPECIFIED.);
#212=B_SPLINE_CURVE_WITH_KNOTS('',3,(#8186,#8187,#8188,#8189,#8190,#8191,
#8192,#8193,#8194,#8195,#8196),.UNSPECIFIED.,.F.,.F.,(4,1,1,1,1,1,1,1,4),
(0.523697189057374,0.527144023246871,0.540847358396277,0.554550693545681,
0.568254028695084,0.581957363844488,0.595660698993892,0.609364034143298,
0.610559610701549),.UNSPECIFIED.);
#213=B_SPLINE_CURVE_WITH_KNOTS('',3,(#8200,#8201,#8202,#8203,#8204,#8205,
#8206,#8207,#8208,#8209,#8210,#8211,#8212,#8213,#8214,#8215,#8216,#8217,
#8218,#8219,#8220,#8221,#8222,#8223,#8224,#8225,#8226,#8227,#8228,#8229,
#8230,#8231,#8232,#8233,#8234,#8235,#8236,#8237,#8238,#8239,#8240,#8241,
#8242,#8243,#8244,#8245,#8246,#8247,#8248,#8249,#8250,#8251,#8252,#8253,
#8254,#8255,#8256,#8257,#8258,#8259,#8260,#8261,#8262,#8263,#8264,#8265,
#8266,#8267,#8268,#8269,#8270,#8271,#8272,#8273,#8274,#8275,#8276,#8277,
#8278,#8279,#8280,#8281,#8282,#8283,#8284,#8285,#8286,#8287,#8288,#8289,
#8290,#8291,#8292,#8293,#8294,#8295,#8296,#8297,#8298,#8299,#8300,#8301,
#8302,#8303,#8304,#8305,#8306,#8307,#8308,#8309,#8310,#8311,#8312,#8313,
#8314,#8315,#8316,#8317,#8318,#8319,#8320,#8321,#8322,#8323,#8324,#8325,
#8326,#8327,#8328,#8329,#8330,#8331,#8332,#8333,#8334,#8335,#8336,#8337,
#8338,#8339,#8340,#8341,#8342,#8343,#8344,#8345,#8346,#8347,#8348,#8349,
#8350,#8351,#8352,#8353,#8354,#8355,#8356,#8357,#8358,#8359,#8360,#8361,
#8362,#8363,#8364,#8365,#8366,#8367,#8368,#8369,#8370,#8371,#8372,#8373,
#8374,#8375,#8376,#8377,#8378,#8379,#8380,#8381,#8382,#8383,#8384,#8385,
#8386,#8387,#8388,#8389,#8390,#8391,#8392),.UNSPECIFIED.,.F.,.F.,(4,3,3,
3,3,3,3,3,3,3,3,3,3,3,3,3,3,3,3,3,3,3,3,3,3,3,3,3,3,3,3,3,3,3,3,3,3,3,3,
3,3,3,3,3,3,3,3,3,3,3,3,3,3,3,3,3,3,3,3,3,3,3,3,3,4),(0.40026264482107,
0.40068005783955,0.401298172326908,0.403122112054375,0.404854072835967,
0.406272748379379,0.40658064230104,0.408299817120458,0.408593931236774,
0.410303799614883,0.411452236049443,0.412005967811544,0.412164935177948,
0.412880174190894,0.414580711910528,0.416275352720443,0.417612227701741,
0.417964185499641,0.419644407627059,0.421319831092384,0.422510280205421,
0.422988022536589,0.423242363459706,0.423979966715549,0.425646329266586,
0.427307253507063,0.428493056189636,0.428962816632566,0.430610517111411,
0.432253777674845,0.433142735507649,0.433890526658095,0.434653191175794,
0.436288555534597,0.437918874058957,0.438969009593022,0.439544214507256,
0.441162326874592,0.442776308055551,0.443395256432532,0.444161065658546,
0.444384383220288,0.444945545890795,0.446552594429736,0.448154936818938,
0.449082182148897,0.449752633068425,0.451343645899633,0.452930796058175,
0.453305875867915,0.454087721097147,0.454512555320115,0.454895109406677,
0.456476850255355,0.458051687309259,0.458867846119032,0.45962280760854,
0.461187824209939,0.462747303652973,0.462906676636076,0.463708819890668,
0.464296353926583,0.464534016139875,0.466084060212194,0.466912947152457),
 .UNSPECIFIED.);
#214=B_SPLINE_CURVE_WITH_KNOTS('',3,(#8977,#8978,#8979,#8980,#8981,#8982,
#8983,#8984,#8985,#8986),.UNSPECIFIED.,.F.,.F.,(4,1,1,1,1,1,1,4),(0.697420868224119,
0.705287380189124,0.718990715338528,0.732694050487935,0.746397385637338,
0.760100720786743,0.773804055936146,0.784281216415016),.UNSPECIFIED.);
#215=B_SPLINE_CURVE_WITH_KNOTS('',3,(#8990,#8991,#8992,#8993,#8994,#8995,
#8996,#8997,#8998,#8999,#9000,#9001,#9002,#9003,#9004,#9005,#9006,#9007,
#9008,#9009,#9010,#9011,#9012,#9013,#9014,#9015,#9016,#9017,#9018,#9019,
#9020,#9021,#9022,#9023,#9024,#9025,#9026,#9027,#9028,#9029,#9030,#9031,
#9032,#9033,#9034,#9035,#9036,#9037,#9038,#9039,#9040,#9041,#9042,#9043,
#9044,#9045,#9046,#9047,#9048,#9049,#9050,#9051,#9052,#9053,#9054,#9055,
#9056,#9057,#9058,#9059,#9060,#9061,#9062,#9063,#9064,#9065,#9066,#9067,
#9068,#9069,#9070,#9071,#9072,#9073,#9074,#9075,#9076,#9077,#9078,#9079,
#9080,#9081,#9082,#9083,#9084,#9085,#9086,#9087,#9088,#9089,#9090,#9091,
#9092,#9093,#9094,#9095,#9096,#9097,#9098,#9099,#9100,#9101,#9102,#9103,
#9104,#9105,#9106,#9107,#9108,#9109,#9110,#9111,#9112,#9113,#9114,#9115,
#9116,#9117,#9118,#9119,#9120,#9121,#9122,#9123,#9124,#9125,#9126,#9127,
#9128,#9129,#9130),.UNSPECIFIED.,.F.,.F.,(4,2,2,2,2,2,2,2,2,2,2,2,1,2,2,
2,2,2,2,2,2,2,2,2,2,2,2,2,2,2,2,2,2,2,1,1,2,2,2,2,2,2,2,2,2,2,2,2,2,2,2,
2,2,2,2,2,2,2,2,2,2,2,2,2,2,2,2,2,2,2,2,4),(0.200128240817423,0.201866030704306,
0.205573880750427,0.206883432337359,0.207534144911759,0.210120282436187,
0.210224576791779,0.213638623857346,0.216417241542985,0.220393815377332,
0.222466371349829,0.223205861279805,0.223429809548967,0.2235778273109,0.225055191442768,
0.227149006897319,0.229560310574581,0.233904198417305,0.235808302768294,
0.236291434739884,0.236309444209184,0.236635037719432,0.239770679330015,
0.23984421783575,0.240659389937292,0.242667019509418,0.246537779635109,
0.247414581457278,0.249103379337275,0.249376969411214,0.249840223369746,
0.249947778277273,0.249987359477586,0.250000553211023,0.250053328144773,
0.250158878012273,0.250369977747273,0.250792177217272,0.25349942716267,
0.254169772977267,0.255299792188578,0.256828602298374,0.259440889256948,
0.261836895729618,0.264395435536737,0.266918538499273,0.267680156017247,
0.270172903762354,0.272632831710573,0.274435347537237,0.274548583388008,
0.274882914502758,0.275582957983243,0.277319751710622,0.279722379511146,
0.281190539057227,0.283579805681781,0.285443367014004,0.28778751713663,
0.290114351083245,0.292413205868745,0.294700922097206,0.296061846577487,
0.296789565268609,0.297130271678214,0.299005501176905,0.301198798902105,
0.301456113617196,0.303695261214307,0.305734169391335,0.30794258256796,
0.30821130439936),.UNSPECIFIED.);
#216=B_SPLINE_CURVE_WITH_KNOTS('',3,(#9715,#9716,#9717,#9718,#9719,#9720,
#9721,#9722,#9723,#9724),.UNSPECIFIED.,.F.,.F.,(4,1,1,1,1,1,1,4),(0.871143699777566,
0.883430737131381,0.897134072280784,0.910837407430191,0.924540742579594,
0.938244077728998,0.951947412878401,0.958004829873163),.UNSPECIFIED.);
#217=B_SPLINE_CURVE_WITH_KNOTS('',3,(#10308,#10309,#10310,#10311,#10312,
#10313,#10314,#10315,#10316,#10317,#10318,#10319,#10320,#10321,#10322,#10323,
#10324,#10325,#10326,#10327,#10328,#10329,#10330,#10331,#10332,#10333,#10334,
#10335,#10336,#10337,#10338,#10339,#10340,#10341,#10342,#10343,#10344,#10345,
#10346,#10347,#10348,#10349,#10350,#10351,#10352,#10353,#10354,#10355,#10356,
#10357,#10358,#10359,#10360,#10361,#10362,#10363),.UNSPECIFIED.,.F.,.F.,
(4,2,2,2,2,2,2,2,2,2,2,2,2,2,2,2,2,2,2,2,2,2,2,2,2,2,2,4),(0.089391423624651,
0.0905595393350974,0.0950944669700259,0.0996107737415503,0.102340633615343,
0.104251480344194,0.108435325486725,0.112629259120639,0.116043968764746,
0.117943339915031,0.122132972586136,0.126333184910187,0.12974730391415,
0.131635193939239,0.135837439883449,0.140050129228384,0.143450639063553,
0.145327049903884,0.149539187021852,0.153761849367854,0.157153974212957,
0.159018905532695,0.163241831024629,0.16747532864817,0.170857309362363,
0.172710560445761,0.175426252194544,0.176252924640868),.UNSPECIFIED.);
#218=B_SPLINE_CURVE_WITH_KNOTS('',3,(#10364,#10365,#10366,#10367,#10368,
#10369,#10370,#10371,#10372,#10373,#10374,#10375,#10376,#10377,#10378,#10379,
#10380,#10381,#10382,#10383,#10384,#10385,#10386,#10387,#10388,#10389),
 .UNSPECIFIED.,.F.,.F.,(4,2,1,2,2,2,2,2,1,2,2,2,2,4),(0.786054712852411,
0.791286205977411,0.796517717577097,0.801749229176782,0.806980740776468,
0.817443763975838,0.827906787175209,0.833138298774895,0.83836981037458,
0.843601321974265,0.848832833573951,0.854064345173636,0.859295856773322,
0.869758855257908),.UNSPECIFIED.);
#219=B_SPLINE_CURVE_WITH_KNOTS('',3,(#10971,#10972,#10973,#10974,#10975,
#10976,#10977,#10978,#10979,#10980,#10981,#10982,#10983,#10984,#10985,#10986,
#10987,#10988,#10989,#10990,#10991,#10992,#10993,#10994,#10995,#10996,#10997,
#10998,#10999,#11000,#11001,#11002,#11003,#11004,#11005,#11006,#11007,#11008,
#11009,#11010,#11011,#11012,#11013,#11014,#11015,#11016,#11017,#11018,#11019,
#11020,#11021,#11022,#11023,#11024,#11025,#11026),.UNSPECIFIED.,.F.,.F.,
(4,2,2,2,2,2,2,2,2,2,2,2,2,2,2,2,2,2,2,2,2,2,2,2,2,2,2,4),(0.263113168368197,
0.265742657838393,0.266780655408191,0.268553749772941,0.272866371808103,
0.27718984066949,0.280483990557595,0.282245605283151,0.28656996226372,0.290905197822577,
0.294187325707001,0.295937460785954,0.300273678533526,0.304620805463894,
0.307890660856405,0.309629316283707,0.313977519703896,0.318336661997184,
0.321593996005809,0.323321171775807,0.327681489161353,0.332052774059168,
0.335297331155212,0.337013027262696,0.341385588548603,0.345769144933327,
0.349000666304619,0.349975518404852),.UNSPECIFIED.);
#220=B_SPLINE_CURVE_WITH_KNOTS('',3,(#11027,#11028,#11029,#11030,#11031,
#11032,#11033,#11034,#11035,#11036,#11037,#11038,#11039,#11040,#11041,#11042,
#11043,#11044,#11045,#11046,#11047,#11048,#11049,#11050,#11051,#11052,#11053,
#11054,#11055,#11056,#11057,#11058,#11059,#11060,#11061,#11062,#11063,#11064,
#11065,#11066,#11067,#11068,#11069,#11070,#11071,#11072,#11073,#11074,#11075,
#11076,#11077,#11078,#11079,#11080,#11081,#11082,#11083,#11084,#11085,#11086,
#11087,#11088,#11089,#11090,#11091,#11092,#11093,#11094,#11095,#11096,#11097,
#11098,#11099,#11100,#11101,#11102,#11103,#11104,#11105,#11106,#11107,#11108,
#11109,#11110,#11111,#11112,#11113,#11114,#11115,#11116,#11117,#11118,#11119,
#11120,#11121,#11122,#11123,#11124,#11125,#11126,#11127,#11128,#11129,#11130,
#11131,#11132,#11133,#11134,#11135,#11136,#11137,#11138,#11139,#11140,#11141,
#11142,#11143,#11144,#11145,#11146,#11147,#11148,#11149,#11150,#11151,#11152,
#11153,#11154,#11155,#11156,#11157,#11158,#11159,#11160,#11161,#11162,#11163,
#11164,#11165,#11166,#11167,#11168,#11169,#11170,#11171,#11172,#11173,#11174,
#11175,#11176,#11177,#11178,#11179,#11180,#11181,#11182,#11183,#11184,#11185,
#11186,#11187,#11188,#11189,#11190,#11191,#11192,#11193,#11194,#11195,#11196,
#11197,#11198,#11199,#11200,#11201,#11202,#11203,#11204,#11205,#11206,#11207,
#11208,#11209,#11210,#11211,#11212,#11213,#11214,#11215,#11216,#11217,#11218,
#11219,#11220,#11221,#11222,#11223,#11224,#11225,#11226,#11227,#11228,#11229,
#11230,#11231,#11232,#11233,#11234,#11235,#11236,#11237,#11238,#11239,#11240,
#11241,#11242,#11243,#11244,#11245,#11246,#11247,#11248,#11249,#11250,#11251,
#11252,#11253,#11254,#11255,#11256,#11257,#11258,#11259,#11260,#11261,#11262,
#11263,#11264,#11265,#11266,#11267,#11268,#11269,#11270,#11271,#11272,#11273,
#11274,#11275,#11276,#11277,#11278,#11279),.UNSPECIFIED.,.F.,.F.,(4,3,3,
3,3,3,3,3,3,3,3,3,3,3,3,3,3,3,3,3,3,3,3,3,3,3,3,3,3,3,3,3,3,3,3,3,3,3,3,
3,3,3,3,3,3,3,3,3,3,3,3,3,3,3,3,3,3,3,3,3,3,3,3,3,3,3,3,3,3,3,3,3,3,3,3,
3,3,3,3,3,3,3,3,3,4),(0.60030257619315,0.601189401238819,0.602909739404366,
0.603245517223693,0.605002346324258,0.605309646424134,0.605545629343393,
0.607003363859578,0.608757263785899,0.60914228646357,0.61004280332781,0.611281209067562,
0.611901081233266,0.613377057716348,0.613853788785253,0.615611323084996,
0.615950716361278,0.617744723300169,0.618053374986395,0.618374836582177,
0.620267953155473,0.622051675015491,0.622385240506117,0.62286069466159,
0.624507651129624,0.624838012505862,0.62663720455143,0.626911687662707,
0.628705580769699,0.629042002612383,0.630872153869016,0.63117842213011,
0.631519302019439,0.633321023521919,0.635145407190063,0.635472861466182,
0.636091011482715,0.637630165874889,0.638198067361429,0.639795378590147,
0.640402274649001,0.642236165068601,0.642568814829256,0.644438788673369,
0.644741885068638,0.645106605890056,0.646921572363247,0.648788889759442,
0.649111263269795,0.649776330530335,0.651306816390525,0.652025413362867,
0.653511077108235,0.654371644464094,0.656249709971456,0.656577713392943,
0.658491743582273,0.658790801499529,0.659184825437669,0.661011007519301,
0.662925930738672,0.663242112785549,0.663967097542107,0.665479537428467,
0.666372856469514,0.667726617355008,0.668874708145114,0.670801793419525,
0.671123555237032,0.67308655957457,0.67337998004951,0.6738114265749,0.675695565724942,
0.676907769656349,0.677663005703046,0.677971115071542,0.678184443340941,
0.678723831294199,0.680306718911389,0.681303959578308,0.682642322751236,
0.683977754105793,0.685960075522419,0.686277776527909,0.688131638809681),
 .UNSPECIFIED.);
#221=B_SPLINE_CURVE_WITH_KNOTS('',3,(#11861,#11862,#11863,#11864,#11865,
#11866,#11867,#11868,#11869,#11870,#11871,#11872,#11873,#11874,#11875,#11876,
#11877,#11878,#11879,#11880,#11881,#11882,#11883,#11884,#11885,#11886,#11887,
#11888,#11889,#11890,#11891,#11892,#11893,#11894,#11895,#11896,#11897,#11898,
#11899,#11900,#11901,#11902,#11903,#11904,#11905,#11906,#11907,#11908,#11909,
#11910,#11911,#11912,#11913,#11914,#11915,#11916),.UNSPECIFIED.,.F.,.F.,
(4,2,2,2,2,2,2,2,2,2,2,2,2,2,2,2,2,2,2,2,2,2,2,2,2,2,2,4),(0.436836898442264,
0.44028512212841,0.443749619786646,0.444924012350447,0.446547870997785,
0.451023331975289,0.455509965844047,0.45862734749985,0.460239726448088,
0.464728704146598,0.469228870973991,0.472330682649257,0.473931581895461,
0.478434230166749,0.482948082318817,0.48603401779866,0.487623437340133,
0.492139912747286,0.496667605253571,0.499737352948064,0.501315292782318,
0.50584575466897,0.510387445283683,0.513440688097467,0.515007078198262,
0.518368370665047,0.521746687744067,0.523697187701085),.UNSPECIFIED.);
#222=B_SPLINE_CURVE_WITH_KNOTS('',3,(#11917,#11918,#11919,#11920,#11921,
#11922,#11923,#11924,#11925,#11926,#11927,#11928,#11929,#11930,#11931,#11932,
#11933,#11934,#11935,#11936,#11937,#11938,#11939,#11940,#11941,#11942,#11943,
#11944,#11945,#11946,#11947,#11948,#11949,#11950,#11951,#11952,#11953,#11954,
#11955,#11956,#11957,#11958,#11959,#11960,#11961,#11962,#11963,#11964,#11965,
#11966,#11967,#11968,#11969,#11970,#11971,#11972,#11973,#11974,#11975,#11976,
#11977,#11978,#11979,#11980,#11981,#11982,#11983,#11984,#11985,#11986,#11987,
#11988,#11989,#11990,#11991,#11992,#11993,#11994,#11995,#11996,#11997,#11998,
#11999,#12000,#12001,#12002,#12003,#12004,#12005,#12006,#12007,#12008,#12009,
#12010,#12011,#12012,#12013,#12014,#12015,#12016,#12017,#12018,#12019,#12020,
#12021,#12022,#12023,#12024,#12025,#12026,#12027,#12028,#12029,#12030,#12031,
#12032,#12033,#12034,#12035,#12036,#12037,#12038,#12039,#12040,#12041,#12042,
#12043,#12044,#12045,#12046,#12047,#12048,#12049,#12050,#12051,#12052,#12053,
#12054,#12055,#12056,#12057,#12058,#12059,#12060,#12061,#12062,#12063,#12064,
#12065,#12066,#12067,#12068,#12069,#12070,#12071,#12072,#12073,#12074,#12075,
#12076,#12077,#12078,#12079,#12080,#12081,#12082,#12083,#12084,#12085,#12086,
#12087,#12088,#12089,#12090,#12091,#12092,#12093,#12094,#12095,#12096,#12097,
#12098,#12099,#12100,#12101,#12102,#12103,#12104,#12105,#12106,#12107,#12108,
#12109,#12110,#12111,#12112,#12113,#12114,#12115,#12116,#12117,#12118,#12119,
#12120,#12121,#12122,#12123,#12124,#12125,#12126,#12127,#12128,#12129,#12130,
#12131,#12132,#12133,#12134,#12135,#12136,#12137,#12138,#12139,#12140,#12141,
#12142,#12143,#12144,#12145,#12146,#12147,#12148,#12149,#12150,#12151,#12152,
#12153,#12154,#12155,#12156,#12157,#12158,#12159,#12160,#12161,#12162,#12163,
#12164,#12165,#12166,#12167,#12168,#12169,#12170,#12171,#12172),
 .UNSPECIFIED.,.F.,.F.,(4,3,3,3,3,3,3,3,3,3,3,3,3,3,3,3,3,3,3,3,3,3,3,3,
3,3,3,3,3,3,3,3,3,3,3,3,3,3,3,3,3,3,3,3,3,3,3,3,3,3,3,3,3,3,3,3,3,3,3,3,
3,3,3,3,3,3,3,3,3,3,3,3,3,3,3,3,3,3,3,3,3,3,3,3,3,4),(0.466912950325338,
0.467472766280947,0.468417974763412,0.46978818431029,0.469932587533265,
0.47129863832162,0.471463494806382,0.472225090173623,0.473608891662702,
0.47373767471581,0.473889674137103,0.47448304624588,0.475906064652203,0.476256251030707,
0.477743996876837,0.477893616364448,0.479393604778962,0.479762574502474,
0.481193393146625,0.481284396849366,0.481852316141335,0.482053144806771,
0.482121930560359,0.482985527023777,0.484015123641915,0.485482165709274,
0.485907842002653,0.48591881725909,0.487361272055883,0.487658933593313,
0.489034092789166,0.489319092825923,0.489623243367662,0.490105456740773,
0.491131958854974,0.491842483861051,0.492337262254517,0.493177582739251,
0.493408292648108,0.494885161573581,0.495269744461007,0.49673736636145,
0.497193341928554,0.498210138514571,0.498662542146804,0.498705857107493,
0.499085866568777,0.499558997728832,0.499573166982503,0.49979556330886,
0.499913846098874,0.499972987493881,0.500002558191385,0.500032128888888,
0.500566703303709,0.500978391208999,0.502528451343835,0.504090245325587,
0.50453782032956,0.504707309097756,0.504763440489445,0.504829201076751,
0.506776975447536,0.507206135241715,0.50833835876222,0.508372021837055,
0.508563272935988,0.509922915497184,0.510791211025289,0.511050748436128,
0.512333539050337,0.513966693221555,0.515141167966327,0.51677136573474,
0.518389456788296,0.518850631020903,0.519903637611228,0.520007168736589,
0.520083154277598,0.521218837616662,0.521646654493025,0.52331386361242,
0.524981072731814,0.525952074805031,0.526661721614175,0.527473735861454),
 .UNSPECIFIED.);
#223=B_SPLINE_CURVE_WITH_KNOTS('',3,(#12754,#12755,#12756,#12757,#12758,
#12759,#12760,#12761,#12762,#12763,#12764,#12765,#12766,#12767,#12768,#12769,
#12770,#12771,#12772,#12773,#12774,#12775,#12776,#12777,#12778,#12779,#12780,
#12781,#12782,#12783,#12784,#12785,#12786,#12787,#12788,#12789,#12790,#12791,
#12792,#12793,#12794,#12795,#12796,#12797,#12798,#12799,#12800,#12801,#12802,
#12803,#12804,#12805,#12806,#12807,#12808,#12809,#12810,#12811,#12812,#12813,
#12814,#12815),.UNSPECIFIED.,.F.,.F.,(4,2,2,2,2,2,2,2,2,2,2,2,2,2,2,2,2,
2,2,2,2,2,2,2,2,2,2,2,2,2,4),(0.610559611763275,0.610850043636259,0.617090034227579,
0.623067369292701,0.624541991686435,0.629215336097819,0.633724591606801,
0.636358127953903,0.637447251019191,0.638233847115783,0.642922915257891,
0.647424308901441,0.650057589910619,0.651158990569127,0.651925702544991,
0.656630689245274,0.661124123609802,0.663757264826821,0.664866706564256,
0.66561755797433,0.670338661630432,0.674824037517178,0.677457153701147,
0.678574530659943,0.679309413403924,0.684037600324779,0.68877699474138,
0.69158404503972,0.693001168048204,0.695899868924858,0.69742086782597),
 .UNSPECIFIED.);
#224=B_SPLINE_CURVE_WITH_KNOTS('',3,(#12816,#12817,#12818,#12819,#12820,
#12821,#12822,#12823,#12824,#12825,#12826,#12827,#12828,#12829,#12830,#12831,
#12832,#12833,#12834,#12835,#12836,#12837,#12838,#12839,#12840,#12841,#12842,
#12843,#12844,#12845,#12846,#12847),.UNSPECIFIED.,.F.,.F.,(4,2,2,2,2,2,
2,2,2,2,2,2,2,2,2,4),(0.308211305137186,0.313964513764408,0.319717722391631,
0.331224139646075,0.336977348273298,0.34273055690052,0.348483765527742,
0.354236974154964,0.359990182782187,0.365743391409409,0.371496600036631,
0.377249808663854,0.383003017291076,0.388756225918298,0.394509434545521,
0.400262643172743),.UNSPECIFIED.);
#225=B_SPLINE_CURVE_WITH_KNOTS('',3,(#13429,#13430,#13431,#13432,#13433,
#13434,#13435,#13436,#13437,#13438,#13439,#13440,#13441,#13442,#13443,#13444,
#13445,#13446,#13447,#13448,#13449,#13450,#13451,#13452,#13453,#13454,#13455,
#13456,#13457,#13458,#13459,#13460,#13461,#13462,#13463,#13464,#13465,#13466,
#13467,#13468,#13469,#13470,#13471,#13472,#13473,#13474,#13475,#13476,#13477,
#13478,#13479,#13480,#13481,#13482,#13483,#13484,#13485,#13486,#13487,#13488,
#13489,#13490,#13491,#13492,#13493,#13494,#13495,#13496),.UNSPECIFIED.,
 .F.,.F.,(4,2,2,2,2,2,2,2,2,2,2,2,2,2,2,2,2,2,2,2,2,2,2,2,2,2,2,2,2,2,2,
2,2,4),(0.784281216698689,0.78698264863415,0.787507391085553,0.788844256867853,
0.793720072464784,0.798128092401485,0.800766058579021,0.801949175664303,
0.802536112338185,0.807430097384011,0.811829032549784,0.814468075293553,
0.815657970812107,0.816227967715558,0.821140858977465,0.825530341127574,
0.828170656142732,0.829366878262443,0.829919823277682,0.834851070858632,
0.839231374720128,0.841872835493414,0.84307582916721,0.843611678581624,
0.84856238680792,0.852932960442674,0.855576174746113,0.856785243116103,
0.857303534077428,0.862265397487825,0.867237990543617,0.869727401981977,
0.870995320127419,0.871143698850696),.UNSPECIFIED.);
#226=B_SPLINE_CURVE_WITH_KNOTS('',3,(#13497,#13498,#13499,#13500,#13501,
#13502,#13503,#13504,#13505,#13506,#13507,#13508,#13509,#13510,#13511,#13512,
#13513,#13514,#13515,#13516,#13517,#13518,#13519,#13520,#13521,#13522,#13523,
#13524,#13525,#13526,#13527,#13528,#13529,#13530,#13531,#13532,#13533),
 .UNSPECIFIED.,.F.,.F.,(4,2,2,1,2,2,1,1,1,1,2,2,2,1,2,2,2,2,2,1,2,4),(0.121170801378382,
0.123638221240141,0.124871931233322,0.124949038107896,0.124997229904505,
0.125006868263826,0.12502614498247,0.125180358731617,0.125488786229913,
0.126105641226503,0.131040481199228,0.140910161144677,0.145845001117402,
0.150779841090126,0.155714681062851,0.160649521035576,0.170519200981025,
0.180388880926474,0.185323720899199,0.190258560871923,0.195193400844648,
0.200128240817373),.UNSPECIFIED.);
#227=B_SPLINE_CURVE_WITH_KNOTS('',3,(#14116,#14117,#14118,#14119,#14120,
#14121,#14122,#14123,#14124,#14125,#14126,#14127,#14128),.UNSPECIFIED.,
 .F.,.F.,(4,2,2,1,2,2,4),(0.958004830573286,0.965218204916734,0.965650748027808,
0.979354083177211,0.993057418326615,0.998193162869371,0.999999998954298),
 .UNSPECIFIED.);
#228=B_SPLINE_CURVE_WITH_KNOTS('',3,(#14130,#14131,#14132,#14133,#14134,
#14135,#14136,#14137,#14138,#14139,#14140,#14141,#14142,#14143,#14144,#14145,
#14146,#14147,#14148,#14149,#14150,#14151,#14152,#14153,#14154,#14155,#14156,
#14157,#14158,#14159,#14160,#14161,#14162,#14163,#14164,#14165,#14166,#14167,
#14168,#14169,#14170,#14171,#14172,#14173,#14174,#14175,#14176,#14177,#14178,
#14179,#14180,#14181,#14182,#14183,#14184,#14185,#14186,#14187,#14188,#14189,
#14190,#14191,#14192,#14193,#14194,#14195,#14196,#14197,#14198,#14199,#14200,
#14201,#14202,#14203,#14204,#14205,#14206,#14207,#14208,#14209,#14210,#14211,
#14212,#14213,#14214,#14215,#14216,#14217,#14218,#14219,#14220,#14221,#14222,
#14223,#14224,#14225,#14226,#14227,#14228,#14229,#14230,#14231,#14232,#14233,
#14234,#14235,#14236,#14237,#14238),.UNSPECIFIED.,.F.,.F.,(4,3,3,3,3,3,
3,3,3,3,3,3,3,3,3,3,3,3,3,3,3,3,3,3,3,3,3,3,3,3,3,3,3,3,3,3,4),(6.4892523968004E-8,
0.0303098328355269,0.0326560244439236,0.0632119133528833,0.0653834825079997,
0.096200234435292,0.0978752966906494,0.124999999999872,0.156825898551176,
0.187499999999807,0.218749999999775,0.233886718749762,0.241455078124755,
0.245239257812252,0.247904457503893,0.249023437499749,0.249999999999749,
0.321501463870902,0.374999999999772,0.437499999999784,0.46874999999979,
0.484374999999793,0.492187499999794,0.498046874999796,0.499999999999796,
0.574186829404018,0.65095850121378,0.7316495777856,0.749999999999898,0.821729675683046,
0.836387398653219,0.895873279501868,0.9746538243741,0.9947442219772,0.999980257398332,
0.999987905873584,0.999999906059835),.UNSPECIFIED.);
#229=B_SPLINE_CURVE_WITH_KNOTS('',3,(#14239,#14240,#14241,#14242,#14243,
#14244,#14245,#14246,#14247,#14248,#14249,#14250,#14251,#14252,#14253,#14254,
#14255,#14256,#14257,#14258,#14259,#14260,#14261,#14262,#14263,#14264,#14265,
#14266,#14267,#14268,#14269,#14270,#14271,#14272,#14273,#14274,#14275,#14276,
#14277,#14278,#14279,#14280,#14281,#14282,#14283,#14284,#14285,#14286,#14287,
#14288,#14289,#14290,#14291,#14292,#14293,#14294,#14295,#14296,#14297,#14298,
#14299,#14300,#14301,#14302,#14303,#14304,#14305,#14306,#14307,#14308,#14309,
#14310,#14311,#14312,#14313,#14314,#14315,#14316,#14317,#14318,#14319,#14320,
#14321,#14322,#14323,#14324,#14325,#14326,#14327,#14328,#14329,#14330,#14331,
#14332,#14333,#14334,#14335,#14336,#14337,#14338,#14339,#14340,#14341,#14342,
#14343,#14344,#14345,#14346,#14347,#14348,#14349,#14350,#14351,#14352,#14353,
#14354,#14355,#14356,#14357,#14358,#14359,#14360,#14361,#14362,#14363,#14364,
#14365,#14366,#14367,#14368,#14369,#14370,#14371,#14372,#14373,#14374,#14375,
#14376,#14377,#14378,#14379,#14380,#14381,#14382,#14383,#14384,#14385,#14386,
#14387,#14388,#14389,#14390,#14391,#14392),.UNSPECIFIED.,.F.,.F.,(4,3,3,
3,3,3,3,3,3,3,3,3,3,3,3,3,3,3,3,3,3,3,3,3,3,3,3,3,3,3,3,3,3,3,3,3,3,3,3,
3,3,3,3,3,3,3,3,3,3,3,3,4),(3.97632464837156E-8,0.00172440149121516,0.00344631668756586,
0.00516203737262083,0.00670803838158865,0.00774281107253354,0.00818571427072393,
0.0082267367645669,0.00871066245660026,0.00967851384066697,0.0116142166088004,
0.0136439934814534,0.0154856221450673,0.0175158415319514,0.019532231790174,
0.0215166827096947,0.0232284332176012,0.0251064767804432,0.0269562513126372,
0.028765616182597,0.0291957874778384,0.029251298201384,0.030971244290135,
0.0327162686059857,0.0344238630610681,0.0354213017409412,0.0354716292813684,
0.0361926684992296,0.037075234445669,0.0387140553626689,0.0388895955048983,
0.0405457991896638,0.042158186540604,0.0437477371496978,0.0453037047735299,
0.0464568664352027,0.0479559015210545,0.0485961294914499,0.0486158495901168,
0.0500753176232095,0.0515183164637155,0.0529361356219318,0.0540392272991108,
0.0541996775077366,0.0544158000537958,0.0544270792994887,0.0558111011310813,
0.0572354607081587,0.0586356494416254,0.0600226828165463,0.0613914473588646,
0.0619424885785764),.UNSPECIFIED.);
#230=B_SPLINE_CURVE_WITH_KNOTS('',3,(#15439,#15440,#15441,#15442,#15443,
#15444,#15445,#15446,#15447,#15448,#15449,#15450,#15451,#15452,#15453,#15454,
#15455,#15456,#15457,#15458,#15459,#15460,#15461,#15462,#15463,#15464,#15465,
#15466,#15467,#15468,#15469,#15470,#15471,#15472,#15473,#15474,#15475,#15476,
#15477,#15478,#15479,#15480,#15481,#15482,#15483,#15484,#15485,#15486,#15487,
#15488,#15489,#15490,#15491,#15492,#15493,#15494,#15495,#15496,#15497,#15498,
#15499,#15500,#15501,#15502,#15503,#15504,#15505,#15506,#15507,#15508,#15509,
#15510,#15511,#15512,#15513,#15514,#15515,#15516,#15517,#15518,#15519,#15520,
#15521,#15522,#15523,#15524,#15525,#15526,#15527,#15528,#15529,#15530,#15531,
#15532,#15533,#15534,#15535,#15536,#15537,#15538,#15539,#15540,#15541,#15542,
#15543,#15544,#15545,#15546,#15547,#15548,#15549,#15550,#15551,#15552,#15553,
#15554,#15555,#15556,#15557,#15558,#15559,#15560,#15561,#15562,#15563,#15564,
#15565,#15566,#15567,#15568,#15569,#15570,#15571,#15572,#15573,#15574,#15575,
#15576,#15577,#15578,#15579,#15580,#15581,#15582,#15583,#15584,#15585,#15586,
#15587,#15588,#15589,#15590,#15591,#15592,#15593,#15594,#15595,#15596,#15597,
#15598,#15599,#15600,#15601,#15602,#15603,#15604,#15605,#15606,#15607,#15608,
#15609,#15610,#15611,#15612,#15613,#15614,#15615,#15616,#15617,#15618,#15619,
#15620,#15621,#15622,#15623,#15624,#15625,#15626,#15627,#15628,#15629,#15630,
#15631,#15632,#15633,#15634,#15635,#15636,#15637,#15638,#15639,#15640,#15641,
#15642,#15643,#15644,#15645,#15646,#15647,#15648,#15649,#15650,#15651,#15652,
#15653,#15654,#15655,#15656,#15657,#15658,#15659,#15660,#15661,#15662,#15663,
#15664),.UNSPECIFIED.,.F.,.F.,(4,3,3,3,3,3,3,3,3,3,3,3,3,3,3,3,3,3,3,3,
3,3,3,3,3,3,3,3,3,3,3,3,3,3,3,3,3,3,3,3,3,3,3,3,3,3,3,3,3,3,3,3,3,3,3,3,
3,3,3,3,3,3,3,3,3,3,3,3,3,3,3,3,3,3,3,4),(0.0957954138550251,0.0973694368287833,
0.099169150459603,0.0992885464156296,0.0994682075194765,0.10117788380623,
0.103051202170915,0.104860834428368,0.104900484463036,0.106172707482356,
0.10798829177732,0.109780529186679,0.11155997790328,0.113320849202563,0.114251888041922,
0.115925743407967,0.116093923911681,0.116940579353324,0.11783936455398,
0.119571137828065,0.12022505715285,0.121289696199548,0.122995465780233,
0.124682731146744,0.126359851182907,0.128021982174466,0.128988174999992,
0.13036374044833,0.130648825037406,0.131406646173312,0.132298200844618,
0.133936629387104,0.13419158991843,0.135564420779676,0.137231883109339,
0.138834577915481,0.140428972302465,0.142012215980763,0.142234270098325,
0.143382119249298,0.143818199971599,0.144580083915999,0.145392777222508,
0.14671538818527,0.146958239098704,0.14851481209128,0.150058113496948,0.151594245443364,
0.153119164993354,0.154367537529932,0.155331971460708,0.155889675323385,
0.156645246228063,0.157403825397766,0.158302568723989,0.158910168502104,
0.160408878039899,0.161896446768575,0.163377813899562,0.164850032747554,
0.165628724733982,0.166439889428972,0.167101230390262,0.167905291326954,
0.168566730257442,0.169072523540991,0.170022020798433,0.171471601880833,
0.172912813703559,0.173625126390695,0.175046987899557,0.176182566839076,
0.176862137969643,0.177601154022328,0.177638950759185,0.178813773999029),
 .UNSPECIFIED.);
#231=B_SPLINE_CURVE_WITH_KNOTS('',3,(#15665,#15666,#15667,#15668,#15669,
#15670),.UNSPECIFIED.,.F.,.F.,(4,2,4),(0.00626618646683869,0.00641405327522236,
0.168443848555957),.UNSPECIFIED.);
#232=B_SPLINE_CURVE_WITH_KNOTS('',3,(#15671,#15672,#15673,#15674,#15675,
#15676),.UNSPECIFIED.,.F.,.F.,(4,2,4),(0.924887378872696,0.931234790832418,
0.937582202792139),.UNSPECIFIED.);
#233=B_SPLINE_CURVE_WITH_KNOTS('',3,(#15677,#15678,#15679,#15680,#15681,
#15682,#15683,#15684,#15685,#15686,#15687,#15688,#15689,#15690,#15691,#15692),
 .UNSPECIFIED.,.F.,.F.,(4,3,3,3,3,4),(0.00792238236276289,0.214683111291234,
0.28932415421094,0.571028871221718,0.818548300485408,0.993309040700024),
 .UNSPECIFIED.);
#234=B_SPLINE_CURVE_WITH_KNOTS('',3,(#16739,#16740,#16741,#16742,#16743,
#16744,#16745,#16746,#16747,#16748,#16749,#16750,#16751,#16752,#16753,#16754,
#16755,#16756,#16757,#16758,#16759,#16760,#16761,#16762,#16763,#16764,#16765,
#16766,#16767,#16768,#16769,#16770,#16771,#16772,#16773),.UNSPECIFIED.,
 .F.,.F.,(4,2,2,2,2,1,1,2,2,1,1,2,2,2,2,2,1,2,2,4),(0.234355020984239,0.238063483052868,
0.241771945121496,0.245480407190124,0.249188869258753,0.249652427017331,
0.249884205896621,0.24998560915631,0.250000095336265,0.25011598477591,0.251043100293067,
0.25289733132738,0.256605793396007,0.264022717533262,0.271439641670516,
0.275148103739144,0.278856565807771,0.282565027876398,0.286273489945025,
0.29369041408228),.UNSPECIFIED.);
#235=B_SPLINE_CURVE_WITH_KNOTS('',3,(#16774,#16775,#16776,#16777,#16778,
#16779,#16780,#16781,#16782,#16783,#16784,#16785,#16786),.UNSPECIFIED.,
 .F.,.F.,(4,3,3,3,4),(0.00646242369474601,0.428971128781701,0.710675845785947,
0.992380562790194,0.993059199643404),.UNSPECIFIED.);
#236=B_SPLINE_CURVE_WITH_KNOTS('',3,(#16787,#16788,#16789,#16790,#16791,
#16792,#16793,#16794,#16795,#16796,#16797,#16798,#16799),.UNSPECIFIED.,
 .F.,.F.,(4,3,3,3,4),(0.00871476069144846,0.149019457426255,0.289324154161062,
0.571028871123302,0.993478005191801),.UNSPECIFIED.);
#237=B_SPLINE_CURVE_WITH_KNOTS('',3,(#17846,#17847,#17848,#17849,#17850,
#17851,#17852,#17853,#17854,#17855,#17856,#17857,#17858,#17859,#17860,#17861,
#17862,#17863,#17864,#17865,#17866,#17867,#17868,#17869,#17870,#17871,#17872,
#17873,#17874,#17875,#17876,#17877,#17878,#17879,#17880,#17881,#17882,#17883,
#17884,#17885,#17886,#17887,#17888,#17889,#17890,#17891,#17892,#17893,#17894,
#17895,#17896,#17897,#17898,#17899,#17900,#17901,#17902,#17903,#17904,#17905,
#17906,#17907,#17908,#17909,#17910,#17911,#17912,#17913,#17914,#17915,#17916,
#17917,#17918,#17919,#17920,#17921,#17922,#17923,#17924,#17925,#17926,#17927,
#17928,#17929,#17930,#17931,#17932,#17933,#17934,#17935,#17936,#17937,#17938,
#17939,#17940,#17941,#17942,#17943,#17944,#17945,#17946,#17947,#17948,#17949,
#17950,#17951,#17952,#17953,#17954,#17955,#17956,#17957,#17958,#17959,#17960,
#17961,#17962,#17963,#17964,#17965,#17966,#17967,#17968,#17969,#17970,#17971,
#17972,#17973,#17974,#17975,#17976,#17977,#17978,#17979,#17980,#17981,#17982,
#17983,#17984,#17985,#17986,#17987,#17988,#17989,#17990,#17991,#17992,#17993,
#17994,#17995,#17996,#17997,#17998,#17999,#18000,#18001,#18002,#18003,#18004,
#18005,#18006,#18007,#18008,#18009,#18010,#18011,#18012,#18013,#18014,#18015,
#18016,#18017,#18018,#18019,#18020,#18021,#18022,#18023,#18024,#18025,#18026,
#18027,#18028,#18029,#18030,#18031,#18032,#18033,#18034,#18035,#18036,#18037,
#18038,#18039,#18040,#18041,#18042,#18043,#18044,#18045,#18046,#18047,#18048,
#18049,#18050,#18051,#18052,#18053,#18054,#18055,#18056,#18057,#18058,#18059,
#18060,#18061,#18062,#18063,#18064,#18065,#18066,#18067,#18068,#18069,#18070,
#18071,#18072,#18073,#18074,#18075,#18076,#18077,#18078,#18079,#18080,#18081,
#18082,#18083,#18084,#18085,#18086,#18087,#18088,#18089,#18090,#18091,#18092,
#18093,#18094,#18095,#18096,#18097,#18098,#18099,#18100,#18101,#18102,#18103,
#18104,#18105,#18106,#18107,#18108,#18109,#18110,#18111,#18112,#18113,#18114,
#18115,#18116,#18117,#18118,#18119,#18120,#18121,#18122,#18123,#18124,#18125,
#18126,#18127,#18128,#18129,#18130,#18131,#18132,#18133,#18134,#18135,#18136,
#18137,#18138,#18139,#18140,#18141,#18142,#18143,#18144,#18145,#18146,#18147,
#18148,#18149,#18150,#18151,#18152,#18153,#18154,#18155,#18156,#18157,#18158,
#18159,#18160,#18161,#18162,#18163,#18164,#18165,#18166,#18167,#18168,#18169,
#18170,#18171,#18172,#18173,#18174,#18175,#18176,#18177,#18178,#18179,#18180,
#18181,#18182,#18183,#18184,#18185,#18186,#18187,#18188,#18189,#18190,#18191,
#18192,#18193,#18194,#18195,#18196,#18197,#18198,#18199,#18200,#18201,#18202,
#18203,#18204,#18205,#18206,#18207,#18208,#18209,#18210,#18211,#18212,#18213,
#18214,#18215,#18216,#18217,#18218,#18219,#18220,#18221,#18222,#18223,#18224,
#18225,#18226,#18227,#18228,#18229,#18230,#18231,#18232,#18233,#18234,#18235,
#18236,#18237,#18238,#18239,#18240,#18241,#18242),.UNSPECIFIED.,.F.,.F.,
(4,2,2,2,2,2,2,2,2,2,2,2,2,2,2,2,2,2,2,2,2,2,2,2,2,2,2,2,2,2,2,2,2,2,2,
2,2,2,2,2,2,1,2,2,2,2,2,2,2,2,2,2,2,2,2,2,2,2,2,2,2,2,2,2,2,2,2,2,1,2,2,
2,2,2,2,2,2,2,2,2,2,2,2,2,2,2,2,2,2,2,2,2,2,2,2,2,2,2,2,2,2,2,2,2,2,2,2,
2,2,2,2,2,2,2,2,2,2,2,2,2,2,2,2,2,2,2,2,2,2,2,2,2,2,2,2,2,2,2,2,1,2,1,2,
2,2,2,2,2,2,2,2,2,2,2,2,2,2,2,2,2,2,2,2,2,2,2,2,2,2,2,2,2,2,2,2,2,2,2,2,
2,1,2,2,2,2,2,2,2,2,2,2,2,2,2,2,2,2,2,2,2,4),(0.367107609598083,0.368964847312714,
0.37086966877977,0.37280426185318,0.374781319385958,0.374958683799677,0.377009020194453,
0.379092597930725,0.381227792733156,0.38280976198235,0.384716676905345,
0.38681359228412,0.38894732035245,0.389698715932177,0.390660840165022,0.392850502620569,
0.395058627881781,0.397289692934818,0.398511918347694,0.400766489904647,
0.403027630515458,0.405295176519577,0.406362996530367,0.408325766076035,
0.409307150848869,0.409797843235286,0.409981852880192,0.410012521154343,
0.410043189428494,0.410288535621702,0.41117224747812,0.414214074713034,
0.417223553071228,0.42023845158777,0.422065152895697,0.423563659028215,
0.425990691987028,0.42752177156856,0.427953461532694,0.428008691289681,
0.428014798080996,0.428076134629298,0.428198807725902,0.42844415391911,
0.428934846305527,0.429505916307871,0.429916231078359,0.432692442681346,
0.43384177016969,0.434332462556106,0.434700481845919,0.434751891090867,
0.434761818394221,0.434823154942523,0.43488671660415,0.435630371316515,
0.435804539715356,0.436541823664368,0.437270921292371,0.437767309261021,
0.438484175824347,0.439188975857639,0.439641809621782,0.439730078806687,
0.440452190690691,0.44071146357952,0.441202155965936,0.441447502159145,
0.441478170433296,0.441493504570371,0.441508838707447,0.441570175255749,
0.441692848352353,0.442327728159749,0.442991673028884,0.443655617898019,
0.444284274873671,0.444909184907272,0.445527221451758,0.445618387443685,
0.446224898539116,0.446823968093983,0.447411519498534,0.447581156989351,
0.448071849375768,0.448194522472372,0.448225190746523,0.448254254743195,
0.448255859020674,0.448317195568976,0.448562541762184,0.449325268510315,
0.449543926535017,0.450299763707288,0.4510471157301,0.451139943988447,0.451873767780298,
0.452599160799218,0.453311871750048,0.45346946562635,0.453677138039288,
0.454410152394009,0.454450850399183,0.454476852698272,0.454941542785599,
0.45497221105975,0.455002879333901,0.455064215882203,0.455186888978808,
0.455432235172016,0.45646416961045,0.457395004717682,0.458386583013429,
0.459357774263348,0.459437452360145,0.460339159036181,0.46058450522939,
0.460615173503541,0.460630507640616,0.460645841777692,0.460707178325994,
0.460829851422598,0.461284012846222,0.461320543809014,0.461781641456812,
0.462248806551281,0.462718531569231,0.463190599962178,0.463283313354681,
0.463774005741097,0.464247298581893,0.464720324721294,0.46519278696983,
0.465246082900347,0.465555321597825,0.466026770866288,0.46622746767318,
0.466242801810256,0.466258135947331,0.466350140769784,0.466472813866388,
0.466618066335382,0.466718160059596,0.466946780485589,0.467208852446012,
0.46789135703017,0.469171621991676,0.47113439153734,0.471625083923756,0.471870430116964,
0.47188576425404,0.471893431322578,0.471901098391115,0.471931766665266,
0.471993103213568,0.472115776310172,0.472606468696588,0.473097161083004,
0.47358785346942,0.474057168992788,0.474525833488244,0.47499283983742,0.475059930628668,
0.475522887022998,0.475827097050343,0.476283327567237,0.4767325449507,0.477022700174332,
0.47726804636754,0.477390719464144,0.477452056012446,0.477488564562354,
0.477513392560748,0.478004084947164,0.478985469719996,0.480023521923481,
0.480948239265659,0.481953151228843,0.482824989219598,0.482911008811323,
0.483033681907927,0.483095018456229,0.48312568673038,0.483156355004531,
0.483401701197739,0.483892393584155,0.484320162979424,0.484873778356987,
0.485788770214547,0.486722522212734,0.48683654790265,0.487817932675482,
0.488308625061898,0.488553971255106,0.488678525472373,0.488799317448314,
0.489141713719346,0.490238156299851,0.491348054101221,0.492478229366485,
0.492724856309834),.UNSPECIFIED.);
#238=B_SPLINE_CURVE_WITH_KNOTS('',3,(#18243,#18244,#18245,#18246,#18247,
#18248,#18249,#18250,#18251,#18252,#18253,#18254,#18255,#18256,#18257,#18258),
 .UNSPECIFIED.,.F.,.F.,(4,3,3,3,3,4),(0.00641426010985688,0.24902581021304,
0.42897112877229,0.710675845770377,0.992380562768465,0.99268872703052),
 .UNSPECIFIED.);
#239=B_SPLINE_CURVE_WITH_KNOTS('',3,(#18259,#18260,#18261,#18262,#18263,
#18264,#18265,#18266,#18267,#18268,#18269,#18270,#18271,#18272,#18273,#18274,
#18275,#18276,#18277,#18278,#18279,#18280,#18281,#18282,#18283),
 .UNSPECIFIED.,.F.,.F.,(4,3,3,3,3,3,3,3,4),(0.00762856436737065,0.00785995433727456,
0.137726949401003,0.273660550208306,0.289324154205214,0.571028871209872,
0.777072122069257,0.979925729817593,0.993466682889809),.UNSPECIFIED.);
#240=B_SPLINE_CURVE_WITH_KNOTS('',3,(#19330,#19331,#19332,#19333,#19334,
#19335,#19336,#19337,#19338,#19339,#19340,#19341,#19342,#19343,#19344,#19345,
#19346,#19347,#19348,#19349,#19350,#19351,#19352,#19353,#19354,#19355,#19356,
#19357,#19358,#19359,#19360,#19361,#19362,#19363,#19364,#19365,#19366,#19367,
#19368,#19369,#19370,#19371,#19372,#19373,#19374,#19375,#19376,#19377,#19378,
#19379,#19380,#19381,#19382,#19383,#19384,#19385,#19386,#19387,#19388,#19389,
#19390,#19391,#19392,#19393,#19394,#19395,#19396,#19397,#19398,#19399,#19400,
#19401,#19402,#19403,#19404,#19405,#19406,#19407,#19408,#19409,#19410,#19411,
#19412,#19413,#19414,#19415,#19416,#19417,#19418,#19419,#19420,#19421,#19422,
#19423,#19424,#19425,#19426,#19427,#19428,#19429,#19430,#19431,#19432,#19433,
#19434,#19435),.UNSPECIFIED.,.F.,.F.,(4,3,3,3,3,3,3,3,3,3,3,3,3,3,3,3,3,
3,3,3,3,3,3,3,3,3,3,3,3,3,3,3,3,3,3,4),(0.584059288737047,0.584363649687051,
0.585483799564989,0.585928959198721,0.585973475162094,0.585983690047865,
0.586017991125467,0.586030547031224,0.58619605497896,0.586908310392931,
0.587620565806902,0.588308249262603,0.58899258965087,0.589670679965167,
0.589757332048814,0.590427444609002,0.591085146474556,0.591734732754917,
0.592371678442908,0.592606353704698,0.593230673050247,0.593318609118669,
0.593674736825654,0.593719252789027,0.593741510770714,0.593752639761557,
0.5937637687524,0.593837637846669,0.593852800679147,0.593939082231613,0.594030864532639,
0.594500631588236,0.594978003474408,0.5954493927738,0.59545537536058,0.595608953121522),
 .UNSPECIFIED.);
#241=B_SPLINE_CURVE_WITH_KNOTS('',3,(#19436,#19437,#19438,#19439,#19440,
#19441,#19442,#19443,#19444,#19445,#19446,#19447,#19448,#19449,#19450,#19451,
#19452,#19453,#19454),.UNSPECIFIED.,.F.,.F.,(4,3,3,3,3,3,4),(0.00612781892556932,
0.00641405327535638,0.428971128783531,0.71067584578898,0.841650264144248,
0.968896048745577,0.991940800391335),.UNSPECIFIED.);
#242=B_SPLINE_CURVE_WITH_KNOTS('',3,(#19456,#19457,#19458,#19459,#19460,
#19461,#19462,#19463,#19464,#19465),.UNSPECIFIED.,.F.,.F.,(4,2,1,1,2,4),
(0.0072622903967858,0.00761943720018088,0.289324154211222,0.571028871222262,
0.993585946738823,0.993693872434941),.UNSPECIFIED.);
#243=B_SPLINE_CURVE_WITH_KNOTS('',3,(#19466,#19467,#19468,#19469,#19470,
#19471,#19472,#19473,#19474,#19475,#19476,#19477,#19478,#19479,#19480,#19481,
#19482,#19483,#19484,#19485,#19486,#19487,#19488,#19489,#19490,#19491,#19492,
#19493,#19494,#19495,#19496,#19497,#19498,#19499,#19500,#19501,#19502,#19503,
#19504,#19505,#19506,#19507,#19508,#19509,#19510,#19511,#19512,#19513,#19514,
#19515,#19516,#19517,#19518,#19519,#19520,#19521,#19522,#19523,#19524,#19525,
#19526,#19527,#19528,#19529,#19530,#19531,#19532,#19533,#19534,#19535,#19536,
#19537,#19538,#19539,#19540,#19541,#19542,#19543,#19544,#19545,#19546,#19547,
#19548,#19549,#19550,#19551,#19552,#19553,#19554,#19555,#19556,#19557,#19558,
#19559,#19560,#19561,#19562,#19563,#19564,#19565,#19566,#19567,#19568,#19569,
#19570,#19571,#19572,#19573,#19574,#19575,#19576,#19577,#19578,#19579,#19580,
#19581,#19582,#19583,#19584,#19585,#19586,#19587,#19588,#19589,#19590,#19591,
#19592,#19593,#19594,#19595,#19596,#19597,#19598,#19599,#19600,#19601,#19602,
#19603,#19604,#19605,#19606,#19607,#19608,#19609,#19610,#19611,#19612,#19613,
#19614,#19615,#19616,#19617,#19618,#19619,#19620,#19621,#19622,#19623,#19624,
#19625,#19626,#19627,#19628,#19629,#19630,#19631,#19632,#19633,#19634,#19635,
#19636,#19637,#19638,#19639,#19640,#19641,#19642,#19643,#19644,#19645,#19646,
#19647,#19648,#19649,#19650,#19651,#19652,#19653,#19654,#19655,#19656,#19657,
#19658,#19659,#19660,#19661,#19662,#19663,#19664,#19665,#19666,#19667,#19668,
#19669,#19670,#19671,#19672,#19673,#19674,#19675,#19676,#19677,#19678,#19679,
#19680,#19681,#19682,#19683,#19684,#19685,#19686,#19687,#19688,#19689,#19690,
#19691,#19692,#19693,#19694,#19695,#19696,#19697,#19698,#19699,#19700,#19701,
#19702,#19703,#19704,#19705,#19706,#19707,#19708,#19709,#19710,#19711,#19712,
#19713,#19714,#19715,#19716,#19717,#19718,#19719,#19720,#19721,#19722,#19723,
#19724,#19725,#19726,#19727,#19728,#19729,#19730,#19731,#19732,#19733,#19734,
#19735,#19736,#19737,#19738,#19739,#19740,#19741,#19742,#19743,#19744,#19745,
#19746,#19747,#19748,#19749,#19750,#19751,#19752,#19753,#19754,#19755,#19756,
#19757,#19758,#19759,#19760,#19761,#19762,#19763,#19764,#19765,#19766,#19767,
#19768,#19769,#19770,#19771,#19772,#19773,#19774,#19775,#19776,#19777,#19778,
#19779,#19780,#19781,#19782,#19783,#19784,#19785,#19786,#19787,#19788,#19789,
#19790,#19791,#19792,#19793,#19794,#19795,#19796,#19797,#19798,#19799,#19800,
#19801,#19802,#19803,#19804,#19805,#19806,#19807,#19808,#19809,#19810,#19811,
#19812,#19813,#19814,#19815,#19816,#19817,#19818,#19819,#19820,#19821,#19822,
#19823,#19824,#19825,#19826,#19827,#19828,#19829,#19830,#19831,#19832,#19833,
#19834,#19835,#19836,#19837,#19838,#19839,#19840,#19841,#19842,#19843,#19844,
#19845,#19846,#19847,#19848,#19849,#19850,#19851,#19852,#19853,#19854,#19855,
#19856,#19857,#19858,#19859,#19860,#19861,#19862,#19863,#19864,#19865,#19866,
#19867,#19868,#19869,#19870,#19871,#19872,#19873,#19874,#19875,#19876,#19877,
#19878,#19879,#19880,#19881,#19882,#19883,#19884,#19885,#19886,#19887,#19888,
#19889,#19890,#19891,#19892,#19893,#19894,#19895,#19896,#19897,#19898,#19899,
#19900,#19901,#19902,#19903,#19904,#19905,#19906,#19907,#19908,#19909,#19910,
#19911,#19912,#19913,#19914,#19915,#19916,#19917,#19918,#19919,#19920,#19921,
#19922,#19923,#19924,#19925,#19926,#19927,#19928,#19929,#19930,#19931,#19932,
#19933,#19934,#19935,#19936,#19937,#19938,#19939,#19940,#19941,#19942,#19943,
#19944,#19945,#19946,#19947,#19948,#19949,#19950,#19951,#19952,#19953,#19954,
#19955,#19956,#19957,#19958,#19959,#19960,#19961,#19962,#19963,#19964,#19965,
#19966,#19967,#19968,#19969,#19970,#19971,#19972,#19973,#19974,#19975,#19976,
#19977,#19978,#19979,#19980,#19981,#19982,#19983,#19984,#19985,#19986,#19987,
#19988,#19989,#19990,#19991,#19992,#19993,#19994,#19995,#19996,#19997,#19998,
#19999,#20000,#20001,#20002,#20003,#20004,#20005,#20006,#20007,#20008,#20009,
#20010,#20011,#20012,#20013,#20014,#20015,#20016,#20017,#20018,#20019,#20020,
#20021,#20022,#20023,#20024,#20025,#20026,#20027,#20028,#20029,#20030,#20031,
#20032,#20033,#20034,#20035,#20036,#20037,#20038,#20039,#20040,#20041,#20042,
#20043,#20044,#20045,#20046,#20047,#20048,#20049,#20050,#20051,#20052,#20053,
#20054,#20055,#20056,#20057,#20058,#20059,#20060,#20061,#20062,#20063,#20064,
#20065,#20066,#20067,#20068,#20069,#20070,#20071,#20072,#20073,#20074,#20075,
#20076,#20077,#20078,#20079,#20080,#20081,#20082,#20083,#20084,#20085,#20086,
#20087,#20088,#20089,#20090,#20091,#20092,#20093,#20094,#20095,#20096,#20097,
#20098,#20099,#20100,#20101,#20102,#20103,#20104,#20105,#20106,#20107,#20108,
#20109,#20110,#20111),.UNSPECIFIED.,.F.,.F.,(4,3,3,3,3,3,3,3,3,3,3,3,3,
3,3,3,3,3,3,3,3,3,3,3,3,3,3,3,3,3,3,3,3,3,3,3,3,3,3,3,3,3,3,3,3,3,3,3,3,
3,3,3,3,3,3,3,3,3,3,3,3,3,3,3,3,3,3,3,3,3,3,3,3,3,3,3,3,3,3,3,3,3,3,3,3,
3,3,3,3,3,3,3,3,3,3,3,3,3,3,3,3,3,3,3,3,3,3,3,3,3,3,3,3,3,3,3,3,3,3,3,3,
3,3,3,3,3,3,3,3,3,3,3,3,3,3,3,3,3,3,3,3,3,3,3,3,3,3,3,3,3,3,3,3,3,3,3,3,
3,3,3,3,3,3,3,3,3,3,3,3,3,3,3,3,3,3,3,3,3,3,3,3,3,3,3,3,3,3,3,3,3,3,3,3,
3,3,3,3,3,3,3,3,3,3,3,3,3,3,3,3,3,3,3,3,3,3,4),(0.595608953122853,0.596070247356062,
0.596286919650697,0.596760945401593,0.596879886188522,0.59734946273636,
0.597487876837672,0.597525877977994,0.597592141602492,0.597636657565865,
0.597658915547552,0.597681173529238,0.597770205455985,0.597948269309477,
0.598304397016463,0.598720016244736,0.600154027117909,0.601153418672346,
0.601801304899499,0.601870301867021,0.602100852630979,0.602517682995376,
0.602577929500288,0.604002440328229,0.605784569750199,0.606851461984113,
0.608275972812054,0.608988228226025,0.609366613914697,0.609388871896384,
0.609433387859757,0.609479551598061,0.609522419786503,0.609621882470614,
0.609700483639996,0.610012485601559,0.610324487563121,0.610544018549676,
0.610636648017686,0.610802746015715,0.611124994467937,0.61130305832143,
0.611347574284803,0.611398707725319,0.611408958560806,0.611481122174923,
0.611837249881908,0.61223229375031,0.612549505295879,0.612943345379587,
0.612947785315796,0.613261760709849,0.613346187505457,0.613350792636596,
0.613439824563342,0.613617888416835,0.61397401612382,0.614789093686037,
0.615398526951761,0.616189731432184,0.616823037779702,0.617179165486687,
0.61722368145006,0.617268197413434,0.61735722934018,0.617425175820721,0.617509379759365,
0.617535293193673,0.618194729187518,0.618247548607643,0.618923400894813,
0.619615150582106,0.620315411535886,0.621025649939558,0.621096570263526,
0.621816713687981,0.622539993750688,0.623265656418722,0.623678209395053,
0.623678211694995,0.623945591919408,0.624657847333379,0.624835911186872,
0.624924943113618,0.624969459076991,0.624991717058678,0.625013975040364,
0.625198931764429,0.625265615469149,0.62537010274735,0.626794613575291,
0.627382646486783,0.628743159419078,0.629643635231175,0.6315755014186,0.632492656887058,
0.63267072074055,0.632801537765147,0.632848784594043,0.63285185866849,0.632857047330714,
0.633204912301028,0.633917167714999,0.635166299906621,0.635341678542941,
0.636620211118615,0.637920562447499,0.638190700198824,0.638309491133865,
0.638309492798994,0.639615211026766,0.640327466440736,0.640377512141058,
0.640438807851656,0.640505530294229,0.640594562220975,0.640639078184349,
0.640683594147722,0.641039721854707,0.641831799461843,0.642293355446172,
0.642620430904346,0.643401147662098,0.64388874351059,0.644652177583447,
0.645406446120628,0.646144555387982,0.646737765166474,0.647451160925361,
0.648099043390967,0.648162275994415,0.648184643565273,0.648340339847908,
0.648429371774655,0.648473887738028,0.648518403701401,0.648874531408386,
0.649586786822357,0.651272630769057,0.651371384569384,0.652435808478241,
0.652742247945453,0.652742249647456,0.653398602840055,0.653443899689937,
0.654887519107246,0.655284830134124,0.655997085548095,0.656100963460009,
0.656175149401588,0.656219665364961,0.656241923346648,0.656264181328334,
0.656321192911723,0.65635321325508,0.656400838991808,0.656709340962066,
0.657251074034466,0.65779189569097,0.658133851790008,0.658671441083884,
0.659080893008818,0.659204868935193,0.659426552130831,0.65955836261795,
0.660082466964611,0.660270618031921,0.660626745738907,0.660770552945684,
0.660913570794868,0.660975315857415,0.660982873445892,0.661396494549974,
0.6618119254538,0.662228970857931,0.662407384273834,0.662825029798101,0.663242591147598,
0.663659782839169,0.663831895101776,0.664009958955269,0.664054474918642,
0.664098990882015,0.664188022808762,0.664544150515747,0.665256405929718,
0.666578017793224,0.66668091675766,0.666878877207228,0.666878879031968,
0.667393172171631,0.667749299878617,0.667949621713796,0.667971879695483,
0.668016395658856,0.668105427585602,0.668141744579546,0.66819142134834,
0.66866157552406,0.669189494105425,0.669529938413544,0.670019583017535,
0.670065975151144,0.670607032869785,0.670954449241487,0.671500087288923,
0.671666704655458,0.67184476850895,0.671991343774546,0.672022832362443,
0.672378960069429,0.673008612513488,0.673632628719942,0.674252215431625,
0.674863249631311,0.675227981725313),.UNSPECIFIED.);
#244=B_SPLINE_CURVE_WITH_KNOTS('',3,(#21158,#21159,#21160,#21161,#21162,
#21163,#21164,#21165,#21166,#21167,#21168,#21169,#21170,#21171,#21172,#21173,
#21174,#21175,#21176,#21177,#21178,#21179,#21180,#21181,#21182,#21183,#21184,
#21185,#21186,#21187,#21188,#21189,#21190,#21191,#21192,#21193,#21194,#21195,
#21196,#21197,#21198,#21199,#21200,#21201,#21202,#21203,#21204,#21205,#21206,
#21207,#21208,#21209,#21210,#21211,#21212,#21213,#21214,#21215,#21216,#21217,
#21218,#21219,#21220,#21221,#21222,#21223,#21224,#21225,#21226,#21227,#21228,
#21229,#21230,#21231,#21232,#21233,#21234,#21235,#21236,#21237,#21238,#21239,
#21240,#21241,#21242,#21243,#21244,#21245,#21246,#21247,#21248,#21249,#21250,
#21251,#21252,#21253,#21254,#21255,#21256,#21257,#21258,#21259,#21260,#21261,
#21262,#21263,#21264,#21265,#21266,#21267,#21268,#21269,#21270,#21271,#21272,
#21273,#21274,#21275,#21276,#21277,#21278,#21279,#21280,#21281,#21282,#21283,
#21284,#21285,#21286,#21287,#21288,#21289,#21290,#21291,#21292,#21293,#21294,
#21295,#21296,#21297,#21298,#21299,#21300,#21301,#21302,#21303,#21304,#21305,
#21306,#21307,#21308,#21309,#21310,#21311,#21312,#21313,#21314,#21315,#21316,
#21317,#21318,#21319,#21320,#21321,#21322,#21323,#21324,#21325,#21326,#21327,
#21328,#21329,#21330,#21331,#21332,#21333,#21334,#21335,#21336,#21337,#21338,
#21339,#21340,#21341,#21342,#21343,#21344,#21345,#21346,#21347,#21348,#21349,
#21350,#21351,#21352,#21353,#21354,#21355,#21356,#21357,#21358,#21359,#21360,
#21361,#21362,#21363,#21364,#21365,#21366,#21367,#21368,#21369,#21370,#21371,
#21372,#21373,#21374,#21375,#21376,#21377,#21378,#21379,#21380,#21381,#21382,
#21383,#21384,#21385,#21386,#21387,#21388,#21389,#21390,#21391,#21392,#21393,
#21394,#21395,#21396,#21397,#21398,#21399,#21400,#21401,#21402,#21403,#21404,
#21405,#21406,#21407,#21408,#21409,#21410,#21411,#21412,#21413,#21414,#21415,
#21416,#21417,#21418,#21419,#21420,#21421,#21422,#21423,#21424,#21425,#21426,
#21427,#21428,#21429,#21430,#21431,#21432,#21433,#21434,#21435,#21436,#21437,
#21438,#21439,#21440,#21441,#21442,#21443,#21444,#21445,#21446,#21447,#21448,
#21449,#21450,#21451,#21452,#21453,#21454,#21455,#21456,#21457,#21458,#21459,
#21460,#21461,#21462,#21463,#21464,#21465,#21466,#21467,#21468,#21469,#21470,
#21471,#21472,#21473,#21474,#21475,#21476,#21477,#21478,#21479,#21480,#21481,
#21482,#21483,#21484,#21485,#21486,#21487,#21488,#21489,#21490,#21491,#21492,
#21493,#21494,#21495,#21496,#21497,#21498,#21499,#21500,#21501,#21502,#21503,
#21504,#21505,#21506,#21507,#21508,#21509,#21510,#21511,#21512,#21513,#21514,
#21515,#21516,#21517,#21518,#21519,#21520,#21521,#21522,#21523,#21524,#21525,
#21526,#21527,#21528,#21529,#21530,#21531,#21532,#21533,#21534,#21535,#21536,
#21537,#21538,#21539,#21540,#21541,#21542,#21543,#21544,#21545,#21546,#21547,
#21548,#21549,#21550,#21551,#21552,#21553,#21554,#21555,#21556,#21557,#21558,
#21559,#21560,#21561,#21562,#21563,#21564,#21565,#21566,#21567,#21568,#21569,
#21570,#21571,#21572,#21573,#21574,#21575,#21576,#21577,#21578,#21579,#21580,
#21581,#21582,#21583,#21584,#21585,#21586,#21587,#21588,#21589,#21590,#21591,
#21592,#21593,#21594,#21595,#21596,#21597,#21598,#21599,#21600,#21601,#21602,
#21603,#21604,#21605,#21606,#21607,#21608,#21609,#21610,#21611,#21612,#21613,
#21614,#21615,#21616,#21617,#21618,#21619,#21620,#21621,#21622,#21623,#21624,
#21625,#21626,#21627,#21628,#21629,#21630,#21631,#21632,#21633,#21634,#21635,
#21636,#21637,#21638,#21639,#21640,#21641,#21642,#21643,#21644,#21645,#21646,
#21647,#21648,#21649,#21650,#21651,#21652,#21653,#21654,#21655,#21656,#21657,
#21658,#21659,#21660,#21661,#21662,#21663,#21664,#21665,#21666,#21667,#21668,
#21669,#21670,#21671,#21672,#21673,#21674,#21675,#21676,#21677,#21678,#21679,
#21680,#21681,#21682,#21683,#21684,#21685,#21686,#21687,#21688,#21689,#21690,
#21691,#21692,#21693,#21694,#21695,#21696,#21697,#21698,#21699,#21700,#21701,
#21702,#21703,#21704,#21705,#21706,#21707,#21708,#21709,#21710,#21711,#21712,
#21713,#21714,#21715,#21716,#21717,#21718,#21719,#21720,#21721,#21722,#21723,
#21724,#21725,#21726,#21727,#21728,#21729,#21730,#21731,#21732,#21733,#21734,
#21735,#21736,#21737,#21738,#21739,#21740,#21741,#21742,#21743,#21744,#21745,
#21746,#21747,#21748,#21749,#21750,#21751,#21752,#21753,#21754,#21755,#21756,
#21757,#21758,#21759,#21760,#21761,#21762,#21763,#21764,#21765,#21766,#21767,
#21768,#21769,#21770,#21771,#21772,#21773,#21774,#21775,#21776,#21777,#21778,
#21779,#21780,#21781,#21782,#21783,#21784,#21785,#21786,#21787,#21788,#21789,
#21790,#21791,#21792,#21793,#21794,#21795,#21796,#21797,#21798,#21799,#21800,
#21801,#21802,#21803,#21804,#21805,#21806,#21807,#21808,#21809,#21810,#21811,
#21812,#21813,#21814,#21815,#21816,#21817,#21818,#21819,#21820,#21821,#21822,
#21823,#21824,#21825,#21826,#21827,#21828,#21829,#21830,#21831,#21832,#21833,
#21834,#21835,#21836,#21837,#21838,#21839,#21840,#21841,#21842,#21843,#21844,
#21845,#21846,#21847,#21848,#21849,#21850,#21851,#21852,#21853,#21854,#21855,
#21856,#21857,#21858,#21859,#21860,#21861,#21862,#21863,#21864,#21865,#21866,
#21867,#21868,#21869,#21870,#21871,#21872,#21873,#21874,#21875,#21876,#21877,
#21878,#21879,#21880,#21881,#21882,#21883,#21884,#21885,#21886,#21887,#21888,
#21889,#21890,#21891,#21892,#21893,#21894,#21895,#21896,#21897,#21898,#21899,
#21900,#21901,#21902,#21903,#21904,#21905,#21906,#21907,#21908,#21909,#21910,
#21911,#21912,#21913,#21914,#21915,#21916,#21917,#21918,#21919,#21920,#21921,
#21922,#21923,#21924,#21925,#21926,#21927,#21928,#21929,#21930,#21931,#21932,
#21933,#21934,#21935,#21936,#21937,#21938,#21939,#21940,#21941,#21942,#21943,
#21944),.UNSPECIFIED.,.F.,.F.,(4,3,3,3,3,3,3,3,3,3,3,3,3,3,3,3,3,3,3,3,
3,3,3,3,3,3,3,3,3,3,3,3,3,3,3,3,3,3,3,3,3,3,3,3,3,3,3,3,3,3,3,3,3,3,3,3,
3,3,3,3,3,3,3,3,3,3,3,3,3,3,3,3,3,3,3,3,3,3,3,3,3,3,3,3,3,3,3,3,3,3,3,3,
3,3,3,3,3,3,3,3,3,3,3,3,3,3,3,3,3,3,3,3,3,3,3,3,3,3,3,3,3,3,3,3,3,3,3,3,
3,3,3,3,3,3,3,3,3,3,3,3,3,3,3,3,3,3,3,3,3,3,3,3,3,3,3,3,3,3,3,3,3,3,3,3,
3,3,3,3,3,3,3,3,3,3,3,3,3,3,3,3,3,3,3,3,3,3,3,3,3,3,3,3,3,3,3,3,3,3,3,3,
3,3,3,3,3,3,3,3,3,3,3,3,3,3,3,3,3,3,3,3,3,3,3,3,3,3,3,3,3,3,3,3,3,3,3,3,
3,3,3,3,3,3,3,3,3,3,3,3,3,3,3,3,3,3,3,3,3,3,3,3,3,3,4),(0.766438813379117,
0.766920556720436,0.766994418774532,0.766994421410418,0.767036195781596,
0.767143109453453,0.767633663453551,0.768123678250697,0.768612436812199,
0.769097826879249,0.769272367931936,0.769280132075166,0.769343464942382,
0.769449466367163,0.76949374097597,0.76953199371373,0.769538015584776,0.76962656480239,
0.769980761672843,0.770689155413749,0.770879227049145,0.772105942895562,
0.772814336636469,0.773215151710996,0.773522730377376,0.773997477771856,
0.774213731177924,0.774939517859189,0.776356305341002,0.777064699081908,
0.777315856079585,0.777418895952361,0.777423609944874,0.777521247630866,
0.777773092822815,0.779212262329437,0.77982275958374,0.780256406513626,
0.780606667786441,0.780751172081232,0.780751174261783,0.780960864656894,
0.78119405339845,0.781315061527347,0.7816391064069,0.78178203519296,0.782023455268254,
0.783440242750067,0.78485703023188,0.785034128667107,0.78512267788472,0.785166952493527,
0.785211227102333,0.78524405790489,0.785260534764961,0.785346281155617,
0.785565423972787,0.786099173377846,0.786273817713693,0.78680552814125,
0.787334011007201,0.787603469449771,0.787690605195506,0.788002614072163,
0.788398998936413,0.788753195806866,0.788930294242093,0.789043134628983,
0.789107392677319,0.78929505197752,0.789371943340843,0.790095008893209,
0.790907871231546,0.791739176730066,0.791940967640946,0.792799578332233,
0.79367582333454,0.7944227894908,0.794422792004143,0.794774542604572,0.795628048445192,
0.796191330086385,0.796545526956838,0.796722625392065,0.796811174609678,
0.796894930371074,0.796899723827292,0.797018239136502,0.797058939579001,
0.797608117568198,0.798902715598724,0.799712216033989,0.800173996733774,
0.800441692531824,0.801757003991896,0.803047598035274,0.80327526749545,
0.803983661236357,0.80433785810681,0.80450988504352,0.804514956542037,0.80454677546367,
0.80460350575965,0.804647780368457,0.804692054977263,0.805945451783087,
0.806108842459076,0.807327082203172,0.808521744965056,0.809399860157965,
0.809399862339398,0.810600647793391,0.811775992386328,0.812199249202922,
0.81227801937274,0.812484386127235,0.812506523431638,0.812528660736042,
0.812572935344848,0.812661484562462,0.812838582997688,0.813192779868142,
0.813910781099534,0.814609567349955,0.814708586360591,0.815318745751743,
0.816022865031994,0.816733003672788,0.817443142313581,0.818116608636848,
0.818780966552084,0.819429745939544,0.819928743757467,0.820029172025655,
0.820276717277207,0.820314179971136,0.820320991886014,0.82036526649482,
0.820453815712433,0.82063091414766,0.820985111018113,0.82169350475902,0.822581489993955,
0.823110292240833,0.823982169391337,0.823982171675481,0.824885679607519,
0.825770016494275,0.825896408602631,0.825911418579233,0.825943867204459,
0.826786726275021,0.827360654686273,0.828069048427179,0.828124391688187,
0.828129926014288,0.828135460340389,0.828157597644792,0.828220519295068,
0.828246146862406,0.82833379325514,0.828348368311424,0.828423245297632,
0.828777442168085,0.829314442920555,0.829849005270666,0.830381293668792,
0.830678409582695,0.830909080412333,0.831042975519044,0.831564061804565,
0.831611017131708,0.831965214002161,0.832041561457525,0.832053763219774,
0.832142312437387,0.832246638694736,0.832313056001767,0.832319410872613,
0.832765386009657,0.833027804613519,0.833478400219784,0.833930071224143,
0.834382346169415,0.83444459209533,0.834896501897554,0.835348033818938,
0.835798934289648,0.835861379577142,0.835905654185948,0.835949928794755,
0.836038478012368,0.836215576447595,0.836569773318047,0.837278167058953,
0.837792974316937,0.837792976615746,0.838694954540764,0.83940334828167,
0.839757545152123,0.83980181976093,0.839846094369736,0.839934643587349,
0.839947581179138,0.839969001883488,0.840111742022576,0.840715610505135,
0.841331353595533,0.841952981807071,0.842311009525566,0.842582123205039,
0.842945316986198,0.843581353790596,0.843653710727104,0.843851407796541,
0.844007907597557,0.844362104468009,0.844920679558333,0.8454760205579,0.845778891949821,
0.846327901824285,0.846869863748779,0.847195679431632,0.847442644059333,
0.847481980587675,0.847549876302085,0.847638425519698,0.847717923923443,
0.847726974737311,0.847904073172537,0.848575540339929,0.848612466913443,
0.849280445377636,0.849320860654349,0.850011273455553,0.850728657666309,
0.851446041877066,0.851534591094679,0.851556728399082,0.851578865703485,
0.851623140312292,0.851800238747518,0.852154435617971,0.852313911746571,
0.852313915832925,0.85274030445882,0.852862829358877,0.853290580636956,
0.853718713066972,0.854146779589909,0.854279616840689,0.854705551773723,
0.854988010581595,0.855208740193291,0.855276751316086,0.855342207452048,
0.855430756669661,0.855452893974064,0.855475031278467,0.855519305887274,
0.8556964043225,0.856957403422413,0.857113184935483),.UNSPECIFIED.);
#245=B_SPLINE_CURVE_WITH_KNOTS('',3,(#21945,#21946,#21947,#21948,#21949,
#21950,#21951,#21952,#21953,#21954,#21955,#21956,#21957,#21958,#21959,#21960,
#21961,#21962,#21963),.UNSPECIFIED.,.F.,.F.,(4,3,3,3,3,3,4),(0.00647039298477672,
0.00650815194354118,0.187063523552203,0.272423656115614,0.428971128897371,
0.710675845977619,0.992223027592002),.UNSPECIFIED.);
#246=B_SPLINE_CURVE_WITH_KNOTS('',3,(#21964,#21965,#21966,#21967,#21968,
#21969,#21970,#21971,#21972,#21973,#21974,#21975,#21976,#21977,#21978,#21979),
 .UNSPECIFIED.,.F.,.F.,(4,3,3,3,3,4),(0.00776222868463544,0.230368426878307,
0.289324154207224,0.57102887121438,0.993585946725114,0.993793472510716),
 .UNSPECIFIED.);
#247=B_SPLINE_CURVE_WITH_KNOTS('',3,(#23025,#23026,#23027,#23028,#23029,
#23030,#23031,#23032,#23033,#23034,#23035,#23036,#23037,#23038,#23039,#23040,
#23041,#23042,#23043,#23044,#23045,#23046,#23047,#23048,#23049,#23050,#23051,
#23052,#23053,#23054,#23055,#23056,#23057,#23058,#23059,#23060,#23061,#23062,
#23063,#23064,#23065,#23066,#23067,#23068,#23069,#23070,#23071,#23072,#23073,
#23074,#23075,#23076,#23077,#23078,#23079,#23080,#23081,#23082,#23083,#23084,
#23085,#23086,#23087,#23088,#23089,#23090,#23091,#23092,#23093,#23094,#23095,
#23096,#23097,#23098,#23099,#23100,#23101,#23102,#23103,#23104,#23105,#23106,
#23107,#23108,#23109,#23110,#23111,#23112,#23113,#23114,#23115,#23116,#23117,
#23118,#23119,#23120,#23121,#23122,#23123,#23124,#23125,#23126,#23127,#23128,
#23129,#23130,#23131,#23132,#23133,#23134,#23135,#23136,#23137,#23138,#23139,
#23140,#23141,#23142,#23143,#23144,#23145,#23146,#23147,#23148,#23149,#23150,
#23151,#23152,#23153,#23154,#23155,#23156),.UNSPECIFIED.,.F.,.F.,(4,1,2,
2,1,2,2,2,2,2,1,1,1,2,2,1,1,1,2,2,2,2,2,2,1,2,2,2,2,2,2,1,2,2,2,1,1,2,2,
1,2,2,2,2,1,1,2,2,2,2,2,1,2,2,2,2,2,2,2,1,2,2,2,2,1,2,2,2,2,2,1,1,2,2,2,
4),(0.948113703813565,0.948924427191478,0.949127108035957,0.949228448458196,
0.949329788880435,0.949735150569392,0.951356597325219,0.952978044081046,
0.953079384503285,0.953130054714404,0.953180724925524,0.953383405770002,
0.953788767458959,0.954599490836872,0.956220937592699,0.956626299281656,
0.956828980126134,0.956930320548373,0.957018993417833,0.957031660970613,
0.957842384348526,0.959463831104352,0.960274554482265,0.960679916171221,
0.9608825970157,0.960933267226819,0.960983937437939,0.961085277860178,0.967571064883483,
0.968381788261396,0.968787149950352,0.969192511639309,0.970813958395135,
0.974056851906787,0.97729974541844,0.977502426262918,0.977603766685157,
0.977654436896277,0.977679772001836,0.977705107107396,0.978110468796353,
0.978921192174266,0.980542638930091,0.981353362308004,0.981758723996961,
0.981961404841439,0.982062745263678,0.982164085685917,0.983785532441743,
0.985406979197569,0.986217702575482,0.98642038341996,0.986521723842199,
0.986623064264438,0.987028425953395,0.98864987270922,0.989460596087133,
0.98986595777609,0.989967298198329,0.990068638620568,0.990271319465046,
0.991892766220872,0.992703489598785,0.993108851287741,0.99321019170998,
0.9932608619211,0.993311532132219,0.993514212976697,0.995135659732523,0.995946383110436,
0.996351744799392,0.99655442564387,0.99660509585499,0.99665576606611,0.996757106488349,
1.),.UNSPECIFIED.);
#248=B_SPLINE_CURVE_WITH_KNOTS('',3,(#23157,#23158,#23159,#23160,#23161,
#23162,#23163,#23164,#23165,#23166,#23167,#23168,#23169,#23170,#23171,#23172),
 .UNSPECIFIED.,.F.,.F.,(4,3,3,3,3,4),(0.00617514239484512,0.00641405327546129,
0.428971128790639,0.710675845800758,0.915420571676874,0.992314315925985),
 .UNSPECIFIED.);
#249=B_SPLINE_CURVE_WITH_KNOTS('',3,(#24217,#24218,#24219,#24220,#24221,
#24222,#24223,#24224,#24225,#24226,#24227,#24228,#24229,#24230,#24231,#24232,
#24233,#24234,#24235,#24236,#24237,#24238,#24239,#24240,#24241,#24242,#24243,
#24244,#24245,#24246,#24247,#24248,#24249,#24250,#24251,#24252,#24253,#24254,
#24255,#24256,#24257,#24258,#24259,#24260,#24261,#24262,#24263,#24264,#24265,
#24266,#24267,#24268,#24269,#24270,#24271,#24272,#24273,#24274,#24275,#24276,
#24277,#24278,#24279,#24280,#24281,#24282,#24283,#24284,#24285,#24286,#24287,
#24288,#24289,#24290,#24291,#24292,#24293,#24294,#24295),.UNSPECIFIED.,
 .F.,.F.,(4,3,3,3,3,3,3,3,3,3,3,3,3,3,3,3,3,3,3,3,3,3,3,3,3,3,4),(0.888640889738739,
0.902427907101658,0.902793193768467,0.906610203573341,0.906716207882565,
0.907184692171588,0.908412276830155,0.911804414725334,0.916628666797235,
0.918588690515693,0.922446388020879,0.923475900047353,0.928448352826507,
0.933554145103328,0.938740411078124,0.944045998028035,0.945725793677129,
0.951214840828147,0.956853348575841,0.962570467749987,0.968400193493765,
0.972862896838564,0.978819372193898,0.984830031271251,0.990397385869064,
0.996267164568745,0.999999989170198),.UNSPECIFIED.);
#250=B_SPLINE_CURVE_WITH_KNOTS('',3,(#25340,#25341,#25342,#25343,#25344,
#25345),.UNSPECIFIED.,.F.,.F.,(4,2,4),(0.0726314174197195,0.084213414842704,
0.0957954105703033),.UNSPECIFIED.);
#251=B_SPLINE_CURVE_WITH_KNOTS('',3,(#26390,#26391,#26392,#26393,#26394,
#26395,#26396,#26397,#26398,#26399,#26400,#26401,#26402,#26403,#26404,#26405,
#26406,#26407,#26408,#26409,#26410,#26411,#26412,#26413,#26414,#26415),
 .UNSPECIFIED.,.F.,.F.,(4,2,2,2,2,2,2,2,2,2,2,2,4),(0.178813773999029,0.18575642987218,
0.192699085745331,0.196170413681907,0.199641741618483,0.203113069555058,
0.206584397491634,0.213527053364785,0.220469709237937,0.223941037174512,
0.227412365111088,0.230883693047664,0.234355020984239),.UNSPECIFIED.);
#252=B_SPLINE_CURVE_WITH_KNOTS('',3,(#27460,#27461,#27462,#27463,#27464,
#27465,#27466,#27467,#27468,#27469,#27470,#27471,#27472,#27473,#27474,#27475,
#27476,#27477,#27478,#27479,#27480,#27481,#27482,#27483,#27484,#27485,#27486,
#27487,#27488,#27489,#27490,#27491,#27492,#27493,#27494,#27495,#27496,#27497),
 .UNSPECIFIED.,.F.,.F.,(4,2,2,2,2,2,2,1,2,2,2,2,2,2,1,1,1,2,2,2,4),(0.29369041408228,
0.302867563024121,0.307456137495041,0.312044711965962,0.316633286436882,
0.321221860907803,0.325810435378723,0.330399009849644,0.334987584320564,
0.339576158791485,0.344164733262405,0.348753307733326,0.349972147827164,
0.350007996065218,0.350043844303272,0.350187237255488,0.350474023159921,
0.351047594968786,0.353341882204246,0.357930456675165,0.367107605617005),
 .UNSPECIFIED.);
#253=B_SPLINE_CURVE_WITH_KNOTS('',3,(#28542,#28543,#28544,#28545,#28546,
#28547,#28548,#28549,#28550,#28551,#28552,#28553,#28554,#28555,#28556,#28557,
#28558,#28559,#28560,#28561,#28562,#28563,#28564,#28565,#28566,#28567,#28568,
#28569,#28570,#28571,#28572,#28573,#28574,#28575,#28576,#28577,#28578,#28579,
#28580,#28581,#28582,#28583,#28584,#28585,#28586,#28587,#28588,#28589,#28590,
#28591,#28592,#28593,#28594,#28595,#28596,#28597,#28598,#28599,#28600,#28601,
#28602,#28603,#28604,#28605,#28606,#28607,#28608,#28609,#28610,#28611,#28612,
#28613,#28614,#28615,#28616,#28617,#28618,#28619,#28620,#28621,#28622,#28623,
#28624,#28625,#28626,#28627,#28628,#28629,#28630,#28631,#28632,#28633,#28634,
#28635,#28636,#28637,#28638,#28639,#28640,#28641,#28642,#28643,#28644,#28645,
#28646,#28647,#28648,#28649,#28650,#28651,#28652,#28653,#28654,#28655,#28656,
#28657,#28658,#28659,#28660,#28661,#28662,#28663,#28664,#28665,#28666,#28667,
#28668,#28669,#28670,#28671,#28672,#28673,#28674,#28675,#28676,#28677,#28678,
#28679,#28680,#28681,#28682,#28683,#28684,#28685,#28686,#28687,#28688,#28689,
#28690,#28691,#28692,#28693,#28694,#28695,#28696,#28697,#28698,#28699,#28700,
#28701,#28702,#28703,#28704,#28705,#28706,#28707,#28708,#28709,#28710,#28711,
#28712,#28713,#28714,#28715,#28716,#28717,#28718,#28719,#28720,#28721,#28722,
#28723,#28724,#28725,#28726,#28727,#28728,#28729,#28730,#28731,#28732,#28733,
#28734,#28735,#28736,#28737,#28738,#28739,#28740,#28741,#28742,#28743,#28744,
#28745,#28746,#28747,#28748,#28749,#28750,#28751,#28752,#28753,#28754,#28755,
#28756,#28757,#28758,#28759,#28760,#28761,#28762,#28763,#28764,#28765,#28766,
#28767,#28768,#28769,#28770,#28771,#28772,#28773,#28774,#28775,#28776,#28777,
#28778,#28779,#28780,#28781,#28782,#28783,#28784,#28785,#28786,#28787,#28788,
#28789,#28790,#28791,#28792,#28793,#28794,#28795,#28796,#28797,#28798,#28799,
#28800,#28801,#28802,#28803,#28804,#28805,#28806,#28807,#28808,#28809,#28810,
#28811,#28812,#28813,#28814,#28815,#28816,#28817,#28818,#28819,#28820,#28821,
#28822,#28823,#28824,#28825,#28826,#28827,#28828,#28829,#28830,#28831,#28832,
#28833,#28834,#28835,#28836,#28837,#28838,#28839,#28840,#28841,#28842,#28843,
#28844,#28845,#28846,#28847,#28848,#28849,#28850,#28851,#28852,#28853,#28854,
#28855,#28856,#28857,#28858,#28859,#28860,#28861,#28862,#28863,#28864,#28865,
#28866,#28867,#28868,#28869,#28870,#28871,#28872,#28873,#28874,#28875,#28876,
#28877,#28878,#28879,#28880,#28881,#28882,#28883,#28884,#28885,#28886,#28887,
#28888,#28889,#28890,#28891,#28892,#28893,#28894,#28895,#28896,#28897,#28898,
#28899,#28900,#28901,#28902,#28903,#28904,#28905,#28906,#28907,#28908,#28909,
#28910,#28911,#28912,#28913,#28914,#28915,#28916,#28917,#28918,#28919,#28920,
#28921,#28922,#28923,#28924,#28925,#28926,#28927,#28928,#28929,#28930,#28931,
#28932,#28933,#28934,#28935,#28936,#28937,#28938,#28939,#28940,#28941,#28942,
#28943,#28944,#28945,#28946,#28947,#28948,#28949,#28950,#28951,#28952,#28953,
#28954,#28955,#28956,#28957,#28958,#28959,#28960,#28961,#28962,#28963,#28964,
#28965,#28966,#28967,#28968,#28969,#28970,#28971,#28972,#28973,#28974,#28975,
#28976,#28977,#28978,#28979,#28980,#28981,#28982,#28983,#28984,#28985,#28986,
#28987,#28988,#28989,#28990,#28991,#28992,#28993,#28994,#28995,#28996,#28997,
#28998,#28999,#29000,#29001,#29002,#29003,#29004,#29005,#29006,#29007,#29008,
#29009,#29010,#29011,#29012,#29013,#29014,#29015,#29016,#29017,#29018,#29019,
#29020,#29021,#29022),.UNSPECIFIED.,.F.,.F.,(4,3,3,3,3,3,3,3,3,3,3,3,3,
3,3,3,3,3,3,3,3,3,3,3,3,3,3,3,3,3,3,3,3,3,3,3,3,3,3,3,3,3,3,3,3,3,3,3,3,
3,3,3,3,3,3,3,3,3,3,3,3,3,3,3,3,3,3,3,3,3,3,3,3,3,3,3,3,3,3,3,3,3,3,3,3,
3,3,3,3,3,3,3,3,3,3,3,3,3,3,3,3,3,3,3,3,3,3,3,3,3,3,3,3,3,3,3,3,3,3,3,3,
3,3,3,3,3,3,3,3,3,3,3,3,3,3,3,3,3,3,3,3,3,3,3,3,3,3,3,3,3,3,3,3,3,3,3,3,
3,3,3,4),(0.49272485694168,0.493888768193928,0.495082580620571,0.496294706027832,
0.497535411400139,0.49803898818619,0.498433258551979,0.499647097021168,
0.499860359055063,0.499954618241577,0.500038746617949,0.500217134180834,
0.500573909306605,0.50102276560411,0.501471914036152,0.501921046168252,
0.50237030945159,0.502816938147025,0.503267518724314,0.503718099301602,
0.503784885438545,0.503874079219988,0.503918676110709,0.503963273001431,
0.504141660564316,0.504680016661156,0.505223958667865,0.505777607981359,
0.506330709637346,0.506886419916935,0.507438555921841,0.507709411822027,
0.50779860560347,0.50787216724432,0.507887799384913,0.508066186947798,0.508422962073569,
0.50934990600665,0.510263351379397,0.511156696878071,0.511633938205509,
0.51181246337981,0.51199071333128,0.51263855704656,0.51458375925044,0.515558464588991,
0.51617071479358,0.516782964998169,0.516985565092075,0.518412665595159,
0.521266866601328,0.523309537094626,0.525330281717531,0.526975268613665,
0.526979020886372,0.527332043739436,0.527376640630157,0.527421237520879,
0.527510431302321,0.527688818865207,0.52813999548312,0.528591815568744,
0.529044096737735,0.529508021302587,0.529959475108322,0.530429635052734,
0.530899794997146,0.531078182560032,0.531167376341474,0.531249407125453,
0.531256570122917,0.531864120447404,0.532482878069911,0.533112615635405,
0.533772547760771,0.534426634857956,0.535087875946294,0.535754873709326,
0.53642791332964,0.537102897171585,0.537779308942848,0.538392072638337,
0.538748847764108,0.538927235326994,0.539016429108437,0.539061025999158,
0.539072175221838,0.539083324444519,0.539105622889879,0.539819173141421,
0.541059647922877,0.54117695344863,0.542400250937006,0.543638340148402,
0.544899891654461,0.545527575153758,0.5462411254053,0.546597900531071,0.546776288093957,
0.5468654818754,0.546910078766121,0.546954675656843,0.547929549946587,0.54892861795247,
0.549808876663011,0.550879202040325,0.551938284614396,0.553026092343931,
0.554090178172265,0.554446953298036,0.554625340860921,0.554714534642364,
0.554803728423807,0.555517278675349,0.556114149924973,0.556938477700684,
0.557756231809566,0.558565222423582,0.559363528843802,0.56014354279587,
0.560912050249951,0.561663324428771,0.561939230939229,0.562296006065,0.562474393627886,
0.562518990518607,0.562563587409328,0.562652781190771,0.564079881693856,
0.565593967736549,0.567120386744285,0.568667226761124,0.569788283706194,
0.570004131325169,0.570145058831965,0.570234252613408,0.570278849504129,
0.57032344639485,0.570501833957736,0.571037995437641,0.571215384209279,
0.571752675657514,0.572290822201886,0.57282974039447,0.573369126757709,
0.573908409100723,0.574445784111936,0.574980590052604,0.575511588696996,
0.576037518865402,0.576553407775522,0.577062826481643,0.577560835524549,
0.577994111598935,0.578083305380378,0.578105603825739,0.578127902271099,
0.578172499161821,0.578350886724706,0.582504217258825,0.584059283272047),
 .UNSPECIFIED.);
#254=B_SPLINE_CURVE_WITH_KNOTS('',3,(#30067,#30068,#30069,#30070,#30071,
#30072,#30073,#30074,#30075,#30076,#30077,#30078,#30079,#30080,#30081,#30082,
#30083,#30084,#30085,#30086,#30087,#30088,#30089,#30090,#30091,#30092,#30093,
#30094,#30095,#30096,#30097,#30098,#30099,#30100,#30101,#30102,#30103,#30104,
#30105,#30106,#30107,#30108,#30109,#30110,#30111,#30112,#30113,#30114,#30115,
#30116,#30117,#30118,#30119,#30120,#30121,#30122,#30123,#30124,#30125,#30126,
#30127,#30128,#30129,#30130,#30131,#30132,#30133,#30134,#30135,#30136,#30137,
#30138,#30139,#30140,#30141,#30142,#30143,#30144,#30145,#30146,#30147,#30148,
#30149,#30150,#30151,#30152,#30153,#30154,#30155,#30156,#30157,#30158,#30159,
#30160,#30161,#30162,#30163,#30164,#30165,#30166,#30167,#30168,#30169,#30170,
#30171,#30172,#30173,#30174,#30175,#30176,#30177,#30178,#30179,#30180,#30181,
#30182,#30183,#30184,#30185,#30186,#30187,#30188,#30189,#30190,#30191,#30192,
#30193,#30194,#30195,#30196,#30197,#30198,#30199,#30200,#30201,#30202,#30203,
#30204,#30205,#30206,#30207,#30208,#30209,#30210,#30211,#30212,#30213,#30214,
#30215,#30216,#30217,#30218,#30219,#30220,#30221,#30222,#30223,#30224,#30225,
#30226,#30227,#30228,#30229,#30230,#30231,#30232,#30233,#30234,#30235,#30236,
#30237,#30238,#30239,#30240,#30241,#30242,#30243,#30244,#30245,#30246,#30247,
#30248,#30249,#30250,#30251,#30252,#30253,#30254,#30255,#30256,#30257,#30258,
#30259,#30260,#30261,#30262,#30263,#30264,#30265,#30266,#30267,#30268,#30269,
#30270,#30271,#30272,#30273,#30274,#30275,#30276,#30277,#30278,#30279,#30280,
#30281,#30282,#30283,#30284,#30285,#30286,#30287,#30288,#30289,#30290,#30291,
#30292,#30293,#30294,#30295,#30296,#30297,#30298,#30299,#30300,#30301,#30302,
#30303,#30304,#30305,#30306,#30307,#30308,#30309,#30310,#30311,#30312,#30313,
#30314,#30315,#30316,#30317,#30318,#30319,#30320,#30321,#30322,#30323,#30324,
#30325,#30326,#30327,#30328,#30329,#30330,#30331,#30332,#30333,#30334,#30335,
#30336,#30337,#30338,#30339,#30340,#30341,#30342,#30343,#30344,#30345,#30346,
#30347,#30348,#30349,#30350,#30351,#30352,#30353,#30354,#30355,#30356,#30357,
#30358,#30359,#30360,#30361,#30362,#30363,#30364,#30365,#30366,#30367,#30368,
#30369,#30370,#30371,#30372,#30373,#30374,#30375,#30376,#30377,#30378,#30379,
#30380,#30381,#30382,#30383,#30384,#30385,#30386,#30387,#30388,#30389,#30390,
#30391,#30392,#30393,#30394,#30395,#30396,#30397,#30398,#30399,#30400,#30401,
#30402,#30403,#30404,#30405,#30406,#30407,#30408,#30409,#30410,#30411,#30412,
#30413,#30414,#30415,#30416,#30417,#30418,#30419,#30420,#30421,#30422,#30423,
#30424,#30425,#30426,#30427,#30428,#30429,#30430,#30431,#30432,#30433,#30434,
#30435,#30436,#30437,#30438,#30439,#30440,#30441,#30442,#30443,#30444,#30445,
#30446,#30447,#30448,#30449,#30450,#30451,#30452,#30453,#30454,#30455,#30456,
#30457,#30458,#30459,#30460,#30461,#30462,#30463,#30464,#30465,#30466,#30467,
#30468,#30469,#30470,#30471,#30472,#30473,#30474,#30475,#30476,#30477,#30478,
#30479,#30480,#30481,#30482,#30483,#30484,#30485,#30486,#30487,#30488,#30489,
#30490,#30491,#30492,#30493,#30494,#30495,#30496,#30497,#30498,#30499,#30500,
#30501,#30502,#30503,#30504,#30505,#30506,#30507,#30508,#30509,#30510,#30511,
#30512,#30513,#30514,#30515,#30516,#30517,#30518,#30519,#30520,#30521,#30522,
#30523,#30524,#30525,#30526,#30527,#30528,#30529,#30530,#30531,#30532,#30533,
#30534,#30535,#30536,#30537,#30538,#30539,#30540,#30541,#30542,#30543,#30544,
#30545,#30546,#30547,#30548,#30549,#30550,#30551,#30552,#30553,#30554,#30555,
#30556,#30557,#30558,#30559,#30560,#30561,#30562,#30563,#30564,#30565,#30566,
#30567,#30568,#30569,#30570,#30571,#30572,#30573,#30574,#30575,#30576,#30577,
#30578,#30579,#30580,#30581,#30582,#30583,#30584,#30585,#30586,#30587,#30588,
#30589,#30590,#30591,#30592,#30593,#30594,#30595,#30596,#30597,#30598,#30599,
#30600,#30601,#30602,#30603,#30604,#30605,#30606,#30607,#30608,#30609,#30610,
#30611,#30612,#30613,#30614,#30615,#30616,#30617,#30618,#30619,#30620,#30621,
#30622,#30623,#30624,#30625,#30626,#30627,#30628,#30629,#30630,#30631,#30632,
#30633,#30634,#30635,#30636,#30637,#30638,#30639,#30640,#30641,#30642,#30643,
#30644,#30645,#30646,#30647,#30648,#30649,#30650,#30651,#30652,#30653,#30654,
#30655,#30656,#30657,#30658,#30659,#30660,#30661,#30662,#30663,#30664,#30665,
#30666,#30667,#30668,#30669,#30670,#30671,#30672,#30673,#30674,#30675,#30676,
#30677,#30678,#30679,#30680,#30681,#30682,#30683,#30684,#30685,#30686,#30687,
#30688,#30689,#30690,#30691,#30692,#30693,#30694,#30695,#30696,#30697,#30698,
#30699,#30700,#30701,#30702,#30703,#30704,#30705,#30706,#30707,#30708,#30709,
#30710,#30711,#30712,#30713,#30714,#30715,#30716,#30717,#30718,#30719,#30720,
#30721,#30722,#30723,#30724,#30725,#30726,#30727,#30728,#30729,#30730,#30731,
#30732,#30733,#30734,#30735,#30736,#30737,#30738,#30739,#30740,#30741,#30742,
#30743,#30744,#30745,#30746,#30747,#30748,#30749,#30750,#30751,#30752,#30753,
#30754,#30755,#30756,#30757,#30758,#30759,#30760,#30761,#30762,#30763,#30764,
#30765,#30766,#30767,#30768,#30769,#30770,#30771,#30772,#30773,#30774,#30775,
#30776,#30777,#30778,#30779,#30780,#30781,#30782,#30783,#30784,#30785,#30786,
#30787,#30788,#30789,#30790),.UNSPECIFIED.,.F.,.F.,(4,3,3,3,3,3,3,3,3,3,
3,3,3,3,3,3,3,3,3,3,3,3,3,3,3,3,3,3,3,3,3,3,3,3,3,3,3,3,3,3,3,3,3,3,3,3,
3,3,3,3,3,3,3,3,3,3,3,3,3,3,3,3,3,3,3,3,3,3,3,3,3,3,3,3,3,3,3,3,3,3,3,3,
3,3,3,3,3,3,3,3,3,3,3,3,3,3,3,3,3,3,3,3,3,3,3,3,3,3,3,3,3,3,3,3,3,3,3,3,
3,3,3,3,3,3,3,3,3,3,3,3,3,3,3,3,3,3,3,3,3,3,3,3,3,3,3,3,3,3,3,3,3,3,3,3,
3,3,3,3,3,3,3,3,3,3,3,3,3,3,3,3,3,3,3,3,3,3,3,3,3,3,3,3,3,3,3,3,3,3,3,3,
3,3,3,3,3,3,3,3,3,3,3,3,3,3,3,3,3,3,3,3,3,3,3,3,3,3,3,3,3,3,3,3,3,3,3,3,
3,3,3,3,3,3,3,3,3,3,3,3,3,3,3,4),(0.675227986968558,0.675584273956731,0.675757575540091,
0.675763239494043,0.675940566188149,0.676547811358883,0.676653150650985,
0.677269582291599,0.677891819544102,0.678078319576658,0.678704325449478,
0.679331765363295,0.67950348850233,0.679681634618039,0.679827885846768,
0.679859780733748,0.680216072965166,0.680779660638072,0.680928657428003,
0.681487387030078,0.681523536352254,0.681523538254503,0.68209873767974,
0.682353826353675,0.682923332993981,0.683066410816511,0.68336429275398,
0.683420003524919,0.683422703047929,0.683511776105784,0.683556312634711,
0.683598422313147,0.683600849163638,0.683778995279347,0.684800309446671,
0.685494481615934,0.686629333130692,0.688354030108895,0.690096752217081,
0.691856530474276,0.692330008833382,0.694068023347093,0.694299440920943,
0.694507648124675,0.695180346684728,0.695366888178122,0.695366890109864,
0.695653818000275,0.695814889961731,0.696273398604143,0.6966055156104,0.698030684536072,
0.698743268998909,0.699099561230327,0.699135716939718,0.699188634288181,
0.699210902552645,0.699233170817109,0.699277707346036,0.699292185421582,
0.699375012610309,0.699455853461745,0.69997924594492,0.700501863488366,
0.700881022387417,0.701400446833164,0.701891620363719,0.701915691184121,
0.70224893855372,0.70230619131309,0.702812452331444,0.703018775775926,0.703330393980557,
0.703422892148363,0.703667245926117,0.703731360238762,0.704463309614413,
0.705206395888629,0.705966462233651,0.706581698090107,0.707362862563105,
0.708178056171534,0.708993247286736,0.708993249779962,0.709432035941452,
0.710205744771089,0.710857204867124,0.710901741396052,0.710946277924979,
0.711035350982834,0.711118272113326,0.71117493514369,0.711213497098543,
0.711569789329961,0.712282373792797,0.713554493779028,0.713811753900404,
0.715132711644143,0.716732490345522,0.717983049495488,0.718654792565297,
0.718670738130625,0.718695633958324,0.718905571137822,0.719051926189742,
0.719408218421161,0.720833387346833,0.722673466062532,0.722851011028383,
0.723841806713265,0.723841808742311,0.72582554969182,0.726181679323169,
0.726277581687204,0.726534063049524,0.726556331313988,0.726578599578451,
0.726623136107378,0.726712209165233,0.726890355280942,0.72724664751236,
0.727959231975196,0.728489493696509,0.728710490161145,0.729384400900868,
0.730121457829964,0.73085103922691,0.731566338605285,0.732234738752212,
0.732947323215048,0.733659907677884,0.734022607967795,0.734113328006978,
0.73437249214072,0.734394760405183,0.734417028669647,0.734461565198574,
0.734550638256429,0.734728784372138,0.735085076603555,0.736205652966467,
0.737301641175155,0.737935414454899,0.738355601336076,0.73835560341631,
0.739437148273089,0.739584128967772,0.739618294979108,0.740640235983285,
0.740785752306242,0.741498336769077,0.741854629000495,0.742032775116204,
0.742121848174059,0.742177518835218,0.74218865296745,0.742210921231913,
0.742267859778797,0.742360135455619,0.742796890429193,0.743325262902069,
0.743636090157584,0.744161617950415,0.744683190545633,0.744749589478535,
0.745061259083254,0.745125268596728,0.745638324960401,0.74577384354609,
0.745951989661799,0.746041062719653,0.746125668407932,0.746130135777507,
0.746309329447835,0.746380341005625,0.746486428008925,0.746884526933262,
0.747284479863715,0.74768613276121,0.747911596934596,0.748313824761295,
0.748715924657244,0.749117582373158,0.749336765860266,0.749693058091684,
0.749871204207393,0.749960277265247,0.749982545529711,0.749993679661943,
0.750004813794174,0.750049350323101,0.750761934785937,0.752013274509048,
0.752187103711607,0.752328042954937,0.752328045085517,0.753528517453903,
0.753612272637277,0.753790418752986,0.753879491810841,0.753924028339768,
0.753968564868695,0.754053048666081,0.754092306674494,0.754324857100113,
0.754894973281299,0.755037441562948,0.755616518319953,0.756176397547834,
0.756202745063993,0.756462610488618,0.75705554988761,0.757175194951453,
0.757531487182871,0.757800658919412,0.757887779414288,0.758484750205109,
0.759078219519917,0.759668729599881,0.760252699887335,0.760738117265629,
0.761311141723518,0.761450701728464,0.761588439956094,0.761616463932177,
0.761793275600524,0.761806993959882,0.762163286191299,0.762806730403298,
0.763458243358919,0.76358845511697,0.764246141116832,0.764907003301851,
0.76501362404264,0.765369916274057,0.765548062389766,0.765628242169248,
0.765637135447621,0.765726208505475,0.766115304698597,0.766188263024046,
0.76643879296831),.UNSPECIFIED.);
#255=B_SPLINE_CURVE_WITH_KNOTS('',3,(#31835,#31836,#31837,#31838,#31839,
#31840,#31841,#31842,#31843,#31844,#31845,#31846,#31847,#31848,#31849,#31850,
#31851,#31852,#31853,#31854,#31855,#31856,#31857,#31858,#31859,#31860,#31861,
#31862,#31863,#31864,#31865,#31866,#31867,#31868,#31869,#31870,#31871,#31872,
#31873,#31874,#31875,#31876,#31877,#31878,#31879,#31880,#31881,#31882,#31883,
#31884,#31885,#31886,#31887,#31888,#31889,#31890,#31891,#31892,#31893,#31894,
#31895,#31896,#31897,#31898,#31899,#31900,#31901,#31902,#31903,#31904,#31905,
#31906,#31907,#31908,#31909,#31910,#31911,#31912,#31913,#31914,#31915,#31916,
#31917,#31918,#31919,#31920,#31921,#31922,#31923,#31924,#31925,#31926,#31927,
#31928,#31929,#31930,#31931,#31932,#31933,#31934,#31935,#31936,#31937,#31938,
#31939,#31940,#31941,#31942,#31943,#31944,#31945,#31946,#31947,#31948,#31949,
#31950,#31951,#31952,#31953,#31954,#31955,#31956,#31957,#31958,#31959,#31960,
#31961,#31962,#31963,#31964,#31965,#31966,#31967,#31968,#31969,#31970,#31971,
#31972,#31973,#31974,#31975,#31976,#31977,#31978,#31979,#31980,#31981,#31982,
#31983,#31984,#31985,#31986,#31987,#31988,#31989,#31990,#31991,#31992,#31993,
#31994,#31995,#31996,#31997,#31998,#31999,#32000,#32001,#32002,#32003,#32004,
#32005,#32006,#32007,#32008,#32009,#32010,#32011,#32012,#32013,#32014,#32015,
#32016,#32017,#32018,#32019,#32020,#32021,#32022,#32023,#32024,#32025,#32026,
#32027,#32028,#32029,#32030,#32031,#32032,#32033,#32034,#32035,#32036,#32037,
#32038,#32039,#32040,#32041,#32042,#32043,#32044,#32045,#32046,#32047,#32048,
#32049,#32050,#32051,#32052,#32053,#32054,#32055,#32056,#32057,#32058,#32059,
#32060,#32061,#32062),.UNSPECIFIED.,.F.,.F.,(4,2,2,1,2,2,1,2,2,2,2,2,1,
1,1,1,1,1,2,2,1,2,2,2,2,2,1,2,2,2,2,2,2,1,1,2,2,2,2,1,2,2,1,2,2,1,2,2,1,
1,2,2,2,2,2,2,1,1,1,1,1,2,2,2,2,1,2,2,1,1,2,2,2,2,1,2,2,1,1,1,2,2,2,2,2,
2,2,2,2,2,2,1,1,2,2,2,2,2,2,2,2,2,1,1,2,2,2,2,2,2,2,1,2,2,2,2,2,1,1,1,2,
2,2,2,2,2,1,1,1,1,2,2,2,1,4),(0.857113191804312,0.858535074804457,0.859956957804601,
0.862800723804891,0.863156194554927,0.863333929929945,0.863511665304963,
0.864222606805035,0.86564448980518,0.867066372805325,0.867155240492834,
0.867244108180343,0.867421843555361,0.867777314305397,0.868488255805469,
0.869910138805614,0.870621080305686,0.870976551055722,0.871087635665109,
0.871109852586986,0.871154286430741,0.871332021805759,0.874175787806047,
0.874886729306119,0.874975596993628,0.875064464681137,0.875242200056155,
0.875597670806192,0.877019553806336,0.879863319806625,0.882707085806914,
0.882795953494423,0.882884821181932,0.88306255655695,0.883418027306986,
0.884128968807058,0.885550851807202,0.888394617807491,0.889816500807635,
0.890527442307707,0.890616309995216,0.890705177682725,0.890882913057743,
0.891238383807779,0.894082149808068,0.894437620558104,0.894526488245613,
0.89454870516749,0.894570922089367,0.894615355933122,0.89479309130814,0.895504032808212,
0.896925915808356,0.8983477988085,0.898436666496009,0.898447774956947,0.898458883417886,
0.898481100339763,0.898525534183518,0.898703269558536,0.899058740308572,
0.899769681808644,0.902613447808932,0.905457213809221,0.906168155309293,
0.906212589153047,0.906245914535863,0.906257022996802,0.906345890684311,
0.906523626059329,0.906879096809365,0.908300979809509,0.911144745809797,
0.913988511810085,0.91403294565384,0.914055162575717,0.914066271036655,
0.914077379497594,0.914166247185103,0.914343982560121,0.914699453310157,
0.91541039481023,0.916832277810374,0.917543219310446,0.917898690060483,
0.918076425435501,0.918254160810519,0.919676043810663,0.921097926810808,
0.92180886831088,0.921897735998389,0.921986603685898,0.922164339060916,
0.922519809810952,0.925363575811241,0.925719046561277,0.926074517311314,
0.926785458811386,0.92820734181153,0.929629224811675,0.929673658655429,
0.929718092499184,0.929806960186693,0.929984695561711,0.930340166311747,
0.931051107811819,0.932472990811963,0.933183932312036,0.933539403062072,
0.933583836905826,0.933628270749581,0.93371713843709,0.933894873812108,
0.936738639812397,0.937449581312469,0.937494015156224,0.937516232078101,
0.937538448999978,0.937627316687487,0.937805052062506,0.938160522812542,
0.939582405812688,0.941004288812835,0.941359759562871,0.941404193406626,
0.941415301867564,0.941426410328503,0.94144862725038,0.941537494937889,
0.941715230312908,0.942426171812981,0.945269937813273,0.945980879313346,
0.946691820813419,0.948113697169739),.UNSPECIFIED.);
#256=B_SPLINE_CURVE_WITH_KNOTS('',3,(#35462,#35463,#35464,#35465,#35466,
#35467,#35468,#35469,#35470,#35471,#35472,#35473,#35474,#35475,#35476,#35477,
#35478,#35479,#35480,#35481,#35482,#35483,#35484,#35485,#35486,#35487,#35488,
#35489,#35490,#35491,#35492,#35493,#35494,#35495,#35496,#35497,#35498,#35499,
#35500,#35501,#35502,#35503,#35504,#35505,#35506,#35507,#35508,#35509,#35510,
#35511,#35512,#35513,#35514,#35515,#35516,#35517,#35518,#35519,#35520,#35521,
#35522,#35523,#35524,#35525,#35526,#35527,#35528,#35529,#35530,#35531,#35532,
#35533,#35534,#35535,#35536,#35537,#35538,#35539,#35540,#35541,#35542,#35543,
#35544,#35545,#35546,#35547,#35548,#35549,#35550,#35551,#35552,#35553,#35554,
#35555,#35556,#35557,#35558,#35559,#35560,#35561,#35562,#35563,#35564,#35565,
#35566,#35567,#35568,#35569,#35570,#35571,#35572,#35573),.UNSPECIFIED.,
 .F.,.F.,(4,3,3,3,3,3,3,3,3,3,3,3,3,3,3,3,3,3,3,3,3,3,3,3,3,3,3,3,3,3,3,
3,3,3,3,3,3,4),(3.06800720444234E-9,0.0992935269980963,0.124999999999843,
0.219034992097561,0.234374999999705,0.242187499999695,0.246093749999691,
0.249999999999686,0.336557093797939,0.374999999999544,0.437499999999472,
0.468749999999436,0.484374999999419,0.49218749999941,0.498046874999403,
0.499999999999401,0.56709925388652,0.624999999999271,0.687499999999206,
0.718749999999173,0.734374999999157,0.742187499999149,0.746093749999145,
0.749023437499142,0.749999999999141,0.781249999999248,0.811345066017165,
0.841337609455092,0.843172533008368,0.873102418731143,0.87499999999957,
0.906249999999678,0.935778277656031,0.937415205047736,0.966667815318544,
0.968707602523868,0.997678975261811,0.999999985094631),.UNSPECIFIED.);
#257=B_SPLINE_CURVE_WITH_KNOTS('',3,(#35796,#35797,#35798,#35799,#35800,
#35801,#35802,#35803,#35804,#35805,#35806,#35807,#35808,#35809,#35810,#35811),
 .UNSPECIFIED.,.F.,.F.,(4,3,3,3,3,4),(2.15030725694357E-6,0.000474399497480272,
0.403817558189829,0.5,0.908942240895127,0.999999993842872),
 .UNSPECIFIED.);
#258=B_SPLINE_CURVE_WITH_KNOTS('',3,(#36882,#36883,#36884,#36885,#36886,
#36887,#36888,#36889,#36890,#36891,#36892,#36893,#36894,#36895,#36896,#36897,
#36898,#36899,#36900,#36901,#36902,#36903,#36904,#36905,#36906,#36907,#36908,
#36909,#36910,#36911,#36912,#36913,#36914,#36915,#36916,#36917,#36918),
 .UNSPECIFIED.,.F.,.F.,(4,3,3,3,3,3,3,3,3,3,3,3,4),(0.279794275727889,0.285714822663596,
0.398539336744006,0.461558263802132,0.525575511584508,0.56693910053495,
0.571265923744503,0.571428663852229,0.686588294638816,0.751167596813213,
0.785714451328873,0.892857225664436,1.),.UNSPECIFIED.);
#259=LINE('',#2138,#289);
#260=LINE('',#2153,#290);
#261=LINE('',#2200,#291);
#262=LINE('',#2216,#292);
#263=LINE('',#2239,#293);
#264=LINE('',#2306,#294);
#265=LINE('',#2308,#295);
#266=LINE('',#2311,#296);
#267=LINE('',#4595,#297);
#268=LINE('',#4599,#298);
#269=LINE('',#4668,#299);
#270=LINE('',#4735,#300);
#271=LINE('',#35825,#301);
#272=LINE('',#35833,#302);
#273=LINE('',#35845,#303);
#274=LINE('',#35853,#304);
#275=LINE('',#35865,#305);
#276=LINE('',#35873,#306);
#277=LINE('',#36466,#307);
#278=LINE('',#36471,#308);
#279=LINE('',#36476,#309);
#280=LINE('',#36480,#310);
#281=LINE('',#36484,#311);
#282=LINE('',#36487,#312);
#283=LINE('',#36489,#313);
#284=LINE('',#36493,#314);
#285=LINE('',#36497,#315);
#286=LINE('',#36501,#316);
#287=LINE('',#36816,#317);
#288=LINE('',#36818,#318);
#289=VECTOR('',#1774,10.);
#290=VECTOR('',#1775,10.);
#291=VECTOR('',#1778,10.);
#292=VECTOR('',#1779,10.);
#293=VECTOR('',#1788,10.);
#294=VECTOR('',#1801,17.5261814341697);
#295=VECTOR('',#1804,18.826);
#296=VECTOR('',#1807,10.);
#297=VECTOR('',#1844,50.5962340495975);
#298=VECTOR('',#1849,17.5);
#299=VECTOR('',#1920,46.9605204399732);
#300=VECTOR('',#1925,52.2477999999999);
#301=VECTOR('',#1976,1000.);
#302=VECTOR('',#1987,1000.);
#303=VECTOR('',#1994,1000.);
#304=VECTOR('',#2005,1000.);
#305=VECTOR('',#2012,1000.);
#306=VECTOR('',#2023,1000.);
#307=VECTOR('',#2030,1000.);
#308=VECTOR('',#2037,1000.);
#309=VECTOR('',#2042,1000.);
#310=VECTOR('',#2045,1000.);
#311=VECTOR('',#2048,1000.);
#312=VECTOR('',#2051,1000.);
#313=VECTOR('',#2052,1000.);
#314=VECTOR('',#2055,1000.);
#315=VECTOR('',#2058,1000.);
#316=VECTOR('',#2061,1000.);
#317=VECTOR('',#2074,1000.);
#318=VECTOR('',#2077,1000.);
#319=CYLINDRICAL_SURFACE('',#1596,19.425);
#320=CYLINDRICAL_SURFACE('',#1600,19.425);
#321=CYLINDRICAL_SURFACE('',#1605,17.5261814341697);
#322=CYLINDRICAL_SURFACE('',#1608,18.826);
#323=CYLINDRICAL_SURFACE('',#1609,19.425);
#324=FACE_BOUND('',#428,.T.);
#325=FACE_BOUND('',#435,.T.);
#326=FACE_BOUND('',#504,.T.);
#327=FACE_BOUND('',#510,.T.);
#328=FACE_OUTER_BOUND('',#427,.T.);
#329=FACE_OUTER_BOUND('',#429,.T.);
#330=FACE_OUTER_BOUND('',#430,.T.);
#331=FACE_OUTER_BOUND('',#431,.T.);
#332=FACE_OUTER_BOUND('',#432,.T.);
#333=FACE_OUTER_BOUND('',#433,.T.);
#334=FACE_OUTER_BOUND('',#434,.T.);
#335=FACE_OUTER_BOUND('',#436,.T.);
#336=FACE_OUTER_BOUND('',#437,.T.);
#337=FACE_OUTER_BOUND('',#438,.T.);
#338=FACE_OUTER_BOUND('',#439,.T.);
#339=FACE_OUTER_BOUND('',#440,.T.);
#340=FACE_OUTER_BOUND('',#441,.T.);
#341=FACE_OUTER_BOUND('',#442,.T.);
#342=FACE_OUTER_BOUND('',#443,.T.);
#343=FACE_OUTER_BOUND('',#444,.T.);
#344=FACE_OUTER_BOUND('',#445,.T.);
#345=FACE_OUTER_BOUND('',#446,.T.);
#346=FACE_OUTER_BOUND('',#447,.T.);
#347=FACE_OUTER_BOUND('',#448,.T.);
#348=FACE_OUTER_BOUND('',#449,.T.);
#349=FACE_OUTER_BOUND('',#450,.T.);
#350=FACE_OUTER_BOUND('',#451,.T.);
#351=FACE_OUTER_BOUND('',#452,.T.);
#352=FACE_OUTER_BOUND('',#453,.T.);
#353=FACE_OUTER_BOUND('',#454,.T.);
#354=FACE_OUTER_BOUND('',#455,.T.);
#355=FACE_OUTER_BOUND('',#456,.T.);
#356=FACE_OUTER_BOUND('',#457,.T.);
#357=FACE_OUTER_BOUND('',#458,.T.);
#358=FACE_OUTER_BOUND('',#459,.T.);
#359=FACE_OUTER_BOUND('',#460,.T.);
#360=FACE_OUTER_BOUND('',#461,.T.);
#361=FACE_OUTER_BOUND('',#462,.T.);
#362=FACE_OUTER_BOUND('',#463,.T.);
#363=FACE_OUTER_BOUND('',#464,.T.);
#364=FACE_OUTER_BOUND('',#465,.T.);
#365=FACE_OUTER_BOUND('',#466,.T.);
#366=FACE_OUTER_BOUND('',#467,.T.);
#367=FACE_OUTER_BOUND('',#468,.T.);
#368=FACE_OUTER_BOUND('',#469,.T.);
#369=FACE_OUTER_BOUND('',#470,.T.);
#370=FACE_OUTER_BOUND('',#471,.T.);
#371=FACE_OUTER_BOUND('',#472,.T.);
#372=FACE_OUTER_BOUND('',#473,.T.);
#373=FACE_OUTER_BOUND('',#474,.T.);
#374=FACE_OUTER_BOUND('',#475,.T.);
#375=FACE_OUTER_BOUND('',#476,.T.);
#376=FACE_OUTER_BOUND('',#477,.T.);
#377=FACE_OUTER_BOUND('',#478,.T.);
#378=FACE_OUTER_BOUND('',#479,.T.);
#379=FACE_OUTER_BOUND('',#480,.T.);
#380=FACE_OUTER_BOUND('',#481,.T.);
#381=FACE_OUTER_BOUND('',#482,.T.);
#382=FACE_OUTER_BOUND('',#483,.T.);
#383=FACE_OUTER_BOUND('',#484,.T.);
#384=FACE_OUTER_BOUND('',#485,.T.);
#385=FACE_OUTER_BOUND('',#486,.T.);
#386=FACE_OUTER_BOUND('',#487,.T.);
#387=FACE_OUTER_BOUND('',#488,.T.);
#388=FACE_OUTER_BOUND('',#489,.T.);
#389=FACE_OUTER_BOUND('',#490,.T.);
#390=FACE_OUTER_BOUND('',#491,.T.);
#391=FACE_OUTER_BOUND('',#492,.T.);
#392=FACE_OUTER_BOUND('',#493,.T.);
#393=FACE_OUTER_BOUND('',#494,.T.);
#394=FACE_OUTER_BOUND('',#495,.T.);
#395=FACE_OUTER_BOUND('',#496,.T.);
#396=FACE_OUTER_BOUND('',#497,.T.);
#397=FACE_OUTER_BOUND('',#498,.T.);
#398=FACE_OUTER_BOUND('',#499,.T.);
#399=FACE_OUTER_BOUND('',#500,.T.);
#400=FACE_OUTER_BOUND('',#501,.T.);
#401=FACE_OUTER_BOUND('',#502,.T.);
#402=FACE_OUTER_BOUND('',#503,.T.);
#403=FACE_OUTER_BOUND('',#505,.T.);
#404=FACE_OUTER_BOUND('',#506,.T.);
#405=FACE_OUTER_BOUND('',#507,.T.);
#406=FACE_OUTER_BOUND('',#508,.T.);
#407=FACE_OUTER_BOUND('',#509,.T.);
#408=FACE_OUTER_BOUND('',#511,.T.);
#409=FACE_OUTER_BOUND('',#512,.T.);
#410=FACE_OUTER_BOUND('',#513,.T.);
#411=FACE_OUTER_BOUND('',#514,.T.);
#412=FACE_OUTER_BOUND('',#515,.T.);
#413=FACE_OUTER_BOUND('',#516,.T.);
#414=FACE_OUTER_BOUND('',#517,.T.);
#415=FACE_OUTER_BOUND('',#518,.T.);
#416=FACE_OUTER_BOUND('',#519,.T.);
#417=FACE_OUTER_BOUND('',#520,.T.);
#418=FACE_OUTER_BOUND('',#521,.T.);
#419=FACE_OUTER_BOUND('',#522,.T.);
#420=FACE_OUTER_BOUND('',#523,.T.);
#421=FACE_OUTER_BOUND('',#524,.T.);
#422=FACE_OUTER_BOUND('',#525,.T.);
#423=FACE_OUTER_BOUND('',#526,.T.);
#424=FACE_OUTER_BOUND('',#527,.T.);
#425=FACE_OUTER_BOUND('',#528,.T.);
#426=FACE_OUTER_BOUND('',#529,.T.);
#427=EDGE_LOOP('',(#971));
#428=EDGE_LOOP('',(#972));
#429=EDGE_LOOP('',(#973,#974,#975,#976));
#430=EDGE_LOOP('',(#977,#978,#979,#980));
#431=EDGE_LOOP('',(#981,#982,#983,#984));
#432=EDGE_LOOP('',(#985,#986,#987,#988,#989));
#433=EDGE_LOOP('',(#990,#991,#992,#993));
#434=EDGE_LOOP('',(#994,#995,#996,#997,#998,#999));
#435=EDGE_LOOP('',(#1000));
#436=EDGE_LOOP('',(#1001,#1002,#1003,#1004,#1005));
#437=EDGE_LOOP('',(#1006,#1007,#1008,#1009));
#438=EDGE_LOOP('',(#1010,#1011,#1012,#1013));
#439=EDGE_LOOP('',(#1014,#1015,#1016,#1017,#1018,#1019));
#440=EDGE_LOOP('',(#1020,#1021,#1022));
#441=EDGE_LOOP('',(#1023,#1024,#1025,#1026,#1027,#1028));
#442=EDGE_LOOP('',(#1029,#1030,#1031,#1032,#1033));
#443=EDGE_LOOP('',(#1034,#1035,#1036,#1037));
#444=EDGE_LOOP('',(#1038,#1039,#1040,#1041));
#445=EDGE_LOOP('',(#1042,#1043,#1044,#1045));
#446=EDGE_LOOP('',(#1046,#1047,#1048,#1049,#1050));
#447=EDGE_LOOP('',(#1051,#1052,#1053,#1054,#1055,#1056,#1057,#1058,#1059,
#1060,#1061,#1062,#1063,#1064,#1065,#1066,#1067,#1068,#1069,#1070,#1071,
#1072,#1073,#1074,#1075,#1076,#1077,#1078,#1079,#1080,#1081,#1082,#1083,
#1084,#1085,#1086,#1087));
#448=EDGE_LOOP('',(#1088,#1089,#1090,#1091,#1092,#1093,#1094,#1095,#1096,
#1097));
#449=EDGE_LOOP('',(#1098,#1099,#1100,#1101,#1102,#1103,#1104));
#450=EDGE_LOOP('',(#1105,#1106,#1107,#1108,#1109));
#451=EDGE_LOOP('',(#1110,#1111,#1112,#1113));
#452=EDGE_LOOP('',(#1114,#1115,#1116,#1117));
#453=EDGE_LOOP('',(#1118,#1119,#1120,#1121));
#454=EDGE_LOOP('',(#1122,#1123,#1124,#1125));
#455=EDGE_LOOP('',(#1126,#1127,#1128,#1129));
#456=EDGE_LOOP('',(#1130,#1131,#1132,#1133));
#457=EDGE_LOOP('',(#1134,#1135,#1136,#1137));
#458=EDGE_LOOP('',(#1138,#1139,#1140,#1141));
#459=EDGE_LOOP('',(#1142,#1143,#1144,#1145));
#460=EDGE_LOOP('',(#1146,#1147,#1148,#1149));
[truncated: 3,206,023 more chars]
