# Supplementary material for: De novo Powered Air-Purifying Respirator Design and Fabrication for Pandemic Response
Source: medRxiv preprint, doi:10.1101/2021.03.25.21252076, version 1 (2021-03-29)
Supplement: Supplementary Material 4 [file 252076_file05.zip › Supplementary Material 4/CAD Files/Custom Filter/Custom Filter Lid.step]

ISO-10303-21;
HEADER;
/* Generated by software containing ST-Developer
 * from STEP Tools, Inc. (www.steptools.com) 
 */

FILE_DESCRIPTION(
/* description */ (''),
/* implementation_level */ '2;1');

FILE_NAME(
/* name */ 'C:/Users/Ferrous/Desktop/custom filter lid.step',
/* time_stamp */ '2020-12-19T19:22:04-05:00',
/* author */ (''),
/* organization */ (''),
/* preprocessor_version */ 'ST-DEVELOPER v18.1',
/* originating_system */ 'Autodesk Translation Framework v9.7.1.1290',
/* authorisation */ '');

FILE_SCHEMA (('AUTOMOTIVE_DESIGN { 1 0 10303 214 3 1 1 }'));
ENDSEC;

DATA;
#10=MECHANICAL_DESIGN_GEOMETRIC_PRESENTATION_REPRESENTATION('',(#17),#51384);
#11=ITEM_DEFINED_TRANSFORMATION($,$,#29655,#32457);
#12=(
REPRESENTATION_RELATIONSHIP($,$,#51395,#51394)
REPRESENTATION_RELATIONSHIP_WITH_TRANSFORMATION(#11)
SHAPE_REPRESENTATION_RELATIONSHIP()
);
#13=CONTEXT_DEPENDENT_SHAPE_REPRESENTATION(#12,#51393);
#14=NEXT_ASSEMBLY_USAGE_OCCURRENCE('Lid v2:1','Lid v2:1','Lid v2:1',#51397,
#51398,'Lid v2:1');
#15=SHAPE_REPRESENTATION_RELATIONSHIP('SRR','None',#51395,#16);
#16=ADVANCED_BREP_SHAPE_REPRESENTATION('',(#18),#51383);
#17=STYLED_ITEM('',(#51409),#18);
#18=MANIFOLD_SOLID_BREP('Body1',#29641);
#19=B_SPLINE_SURFACE_WITH_KNOTS('',1,3,((#47851,#47852,#47853,#47854),(#47855,
#47856,#47857,#47858)),.UNSPECIFIED.,.F.,.F.,.F.,(2,2),(4,4),(0.,1.),(0.,
0.0001836636850694),.UNSPECIFIED.);
#20=B_SPLINE_SURFACE_WITH_KNOTS('',1,3,((#47859,#47860,#47861,#47862,#47863,
#47864,#47865,#47866,#47867,#47868),(#47869,#47870,#47871,#47872,#47873,
#47874,#47875,#47876,#47877,#47878)),.UNSPECIFIED.,.F.,.F.,.F.,(2,2),(4,
2,2,2,4),(0.,1.),(0.,0.00013155640584323,0.000263112811686459,0.000394669217529689,
0.000526225623372918),.UNSPECIFIED.);
#21=B_SPLINE_SURFACE_WITH_KNOTS('',1,3,((#47879,#47880,#47881,#47882),(#47883,
#47884,#47885,#47886)),.UNSPECIFIED.,.F.,.F.,.F.,(2,2),(4,4),(0.,1.),(0.,
0.000230590169196254),.UNSPECIFIED.);
#22=B_SPLINE_SURFACE_WITH_KNOTS('',1,3,((#47887,#47888,#47889,#47890,#47891,
#47892),(#47893,#47894,#47895,#47896,#47897,#47898)),.UNSPECIFIED.,.F.,
 .F.,.F.,(2,2),(4,2,4),(0.,1.),(0.,0.000154736130843733,0.000309472261687467),
 .UNSPECIFIED.);
#23=B_SPLINE_SURFACE_WITH_KNOTS('',1,3,((#47899,#47900,#47901,#47902,#47903,
#47904),(#47905,#47906,#47907,#47908,#47909,#47910)),.UNSPECIFIED.,.F.,
 .F.,.F.,(2,2),(4,2,4),(0.,1.),(0.,0.000225296864609234,0.000450593729218469),
 .UNSPECIFIED.);
#24=B_SPLINE_SURFACE_WITH_KNOTS('',1,3,((#47911,#47912,#47913,#47914,#47915,
#47916),(#47917,#47918,#47919,#47920,#47921,#47922)),.UNSPECIFIED.,.F.,
 .F.,.F.,(2,2),(4,2,4),(0.,1.),(0.,0.000207731735336673,0.000415463470673347),
 .UNSPECIFIED.);
#25=B_SPLINE_SURFACE_WITH_KNOTS('',1,3,((#47923,#47924,#47925,#47926,#47927,
#47928),(#47929,#47930,#47931,#47932,#47933,#47934)),.UNSPECIFIED.,.F.,
 .F.,.F.,(2,2),(4,2,4),(0.,1.),(0.,0.00017280922218594,0.000345618444371881),
 .UNSPECIFIED.);
#26=B_SPLINE_SURFACE_WITH_KNOTS('',1,3,((#47935,#47936,#47937,#47938,#47939,
#47940),(#47941,#47942,#47943,#47944,#47945,#47946)),.UNSPECIFIED.,.F.,
 .F.,.F.,(2,2),(4,2,4),(0.,1.),(0.,0.000190209786850495,0.00038041957370099),
 .UNSPECIFIED.);
#27=B_SPLINE_SURFACE_WITH_KNOTS('',1,3,((#48342,#48343,#48344,#48345),(#48346,
#48347,#48348,#48349)),.UNSPECIFIED.,.F.,.F.,.F.,(2,2),(4,4),(0.,1.),(0.,
0.0001836636850694),.UNSPECIFIED.);
#28=B_SPLINE_SURFACE_WITH_KNOTS('',1,3,((#48350,#48351,#48352,#48353,#48354,
#48355,#48356,#48357,#48358,#48359),(#48360,#48361,#48362,#48363,#48364,
#48365,#48366,#48367,#48368,#48369)),.UNSPECIFIED.,.F.,.F.,.F.,(2,2),(4,
2,2,2,4),(0.,1.),(0.,0.00013155640584323,0.000263112811686459,0.000394669217529689,
0.000526225623372918),.UNSPECIFIED.);
#29=B_SPLINE_SURFACE_WITH_KNOTS('',1,3,((#48370,#48371,#48372,#48373),(#48374,
#48375,#48376,#48377)),.UNSPECIFIED.,.F.,.F.,.F.,(2,2),(4,4),(0.,1.),(0.,
0.000230590169196254),.UNSPECIFIED.);
#30=B_SPLINE_SURFACE_WITH_KNOTS('',1,3,((#48378,#48379,#48380,#48381,#48382,
#48383),(#48384,#48385,#48386,#48387,#48388,#48389)),.UNSPECIFIED.,.F.,
 .F.,.F.,(2,2),(4,2,4),(0.,1.),(0.,0.000154736130843733,0.000309472261687467),
 .UNSPECIFIED.);
#31=B_SPLINE_SURFACE_WITH_KNOTS('',1,3,((#48390,#48391,#48392,#48393,#48394,
#48395),(#48396,#48397,#48398,#48399,#48400,#48401)),.UNSPECIFIED.,.F.,
 .F.,.F.,(2,2),(4,2,4),(0.,1.),(0.,0.000225296864609234,0.000450593729218469),
 .UNSPECIFIED.);
#32=B_SPLINE_SURFACE_WITH_KNOTS('',1,3,((#48402,#48403,#48404,#48405,#48406,
#48407),(#48408,#48409,#48410,#48411,#48412,#48413)),.UNSPECIFIED.,.F.,
 .F.,.F.,(2,2),(4,2,4),(0.,1.),(0.,0.000207731735336673,0.000415463470673347),
 .UNSPECIFIED.);
#33=B_SPLINE_SURFACE_WITH_KNOTS('',1,3,((#48414,#48415,#48416,#48417,#48418,
#48419),(#48420,#48421,#48422,#48423,#48424,#48425)),.UNSPECIFIED.,.F.,
 .F.,.F.,(2,2),(4,2,4),(0.,1.),(0.,0.00017280922218594,0.000345618444371881),
 .UNSPECIFIED.);
#34=B_SPLINE_SURFACE_WITH_KNOTS('',1,3,((#48426,#48427,#48428,#48429,#48430,
#48431),(#48432,#48433,#48434,#48435,#48436,#48437)),.UNSPECIFIED.,.F.,
 .F.,.F.,(2,2),(4,2,4),(0.,1.),(0.,0.000190209786850495,0.00038041957370099),
 .UNSPECIFIED.);
#35=B_SPLINE_SURFACE_WITH_KNOTS('',1,3,((#48842,#48843,#48844,#48845),(#48846,
#48847,#48848,#48849)),.UNSPECIFIED.,.F.,.F.,.F.,(2,2),(4,4),(0.,1.),(0.,
0.0001836636850694),.UNSPECIFIED.);
#36=B_SPLINE_SURFACE_WITH_KNOTS('',1,3,((#48850,#48851,#48852,#48853,#48854,
#48855,#48856,#48857,#48858,#48859),(#48860,#48861,#48862,#48863,#48864,
#48865,#48866,#48867,#48868,#48869)),.UNSPECIFIED.,.F.,.F.,.F.,(2,2),(4,
2,2,2,4),(0.,1.),(0.,0.00013155640584323,0.000263112811686459,0.000394669217529689,
0.000526225623372918),.UNSPECIFIED.);
#37=B_SPLINE_SURFACE_WITH_KNOTS('',1,3,((#48870,#48871,#48872,#48873),(#48874,
#48875,#48876,#48877)),.UNSPECIFIED.,.F.,.F.,.F.,(2,2),(4,4),(0.,1.),(0.,
0.000230590169196254),.UNSPECIFIED.);
#38=B_SPLINE_SURFACE_WITH_KNOTS('',1,3,((#48878,#48879,#48880,#48881,#48882,
#48883),(#48884,#48885,#48886,#48887,#48888,#48889)),.UNSPECIFIED.,.F.,
 .F.,.F.,(2,2),(4,2,4),(0.,1.),(0.,0.000154736130843733,0.000309472261687467),
 .UNSPECIFIED.);
#39=B_SPLINE_SURFACE_WITH_KNOTS('',1,3,((#48890,#48891,#48892,#48893,#48894,
#48895),(#48896,#48897,#48898,#48899,#48900,#48901)),.UNSPECIFIED.,.F.,
 .F.,.F.,(2,2),(4,2,4),(0.,1.),(0.,0.000225296864609234,0.000450593729218469),
 .UNSPECIFIED.);
#40=B_SPLINE_SURFACE_WITH_KNOTS('',1,3,((#48902,#48903,#48904,#48905,#48906,
#48907),(#48908,#48909,#48910,#48911,#48912,#48913)),.UNSPECIFIED.,.F.,
 .F.,.F.,(2,2),(4,2,4),(0.,1.),(0.,0.000207731735336673,0.000415463470673347),
 .UNSPECIFIED.);
#41=B_SPLINE_SURFACE_WITH_KNOTS('',1,3,((#48914,#48915,#48916,#48917,#48918,
#48919),(#48920,#48921,#48922,#48923,#48924,#48925)),.UNSPECIFIED.,.F.,
 .F.,.F.,(2,2),(4,2,4),(0.,1.),(0.,0.00017280922218594,0.000345618444371881),
 .UNSPECIFIED.);
#42=B_SPLINE_SURFACE_WITH_KNOTS('',1,3,((#48926,#48927,#48928,#48929,#48930,
#48931),(#48932,#48933,#48934,#48935,#48936,#48937)),.UNSPECIFIED.,.F.,
 .F.,.F.,(2,2),(4,2,4),(0.,1.),(0.,0.000190209786850495,0.00038041957370099),
 .UNSPECIFIED.);
#43=B_SPLINE_SURFACE_WITH_KNOTS('',1,3,((#49333,#49334,#49335,#49336),(#49337,
#49338,#49339,#49340)),.UNSPECIFIED.,.F.,.F.,.F.,(2,2),(4,4),(0.,1.),(0.,
0.0001836636850694),.UNSPECIFIED.);
#44=B_SPLINE_SURFACE_WITH_KNOTS('',1,3,((#49341,#49342,#49343,#49344,#49345,
#49346,#49347,#49348,#49349,#49350),(#49351,#49352,#49353,#49354,#49355,
#49356,#49357,#49358,#49359,#49360)),.UNSPECIFIED.,.F.,.F.,.F.,(2,2),(4,
2,2,2,4),(0.,1.),(0.,0.00013155640584323,0.000263112811686459,0.000394669217529689,
0.000526225623372918),.UNSPECIFIED.);
#45=B_SPLINE_SURFACE_WITH_KNOTS('',1,3,((#49361,#49362,#49363,#49364),(#49365,
#49366,#49367,#49368)),.UNSPECIFIED.,.F.,.F.,.F.,(2,2),(4,4),(0.,1.),(0.,
0.000230590169196254),.UNSPECIFIED.);
#46=B_SPLINE_SURFACE_WITH_KNOTS('',1,3,((#49369,#49370,#49371,#49372,#49373,
#49374),(#49375,#49376,#49377,#49378,#49379,#49380)),.UNSPECIFIED.,.F.,
 .F.,.F.,(2,2),(4,2,4),(0.,1.),(0.,0.000154736130843733,0.000309472261687467),
 .UNSPECIFIED.);
#47=B_SPLINE_SURFACE_WITH_KNOTS('',1,3,((#49381,#49382,#49383,#49384,#49385,
#49386),(#49387,#49388,#49389,#49390,#49391,#49392)),.UNSPECIFIED.,.F.,
 .F.,.F.,(2,2),(4,2,4),(0.,1.),(0.,0.000225296864609234,0.000450593729218469),
 .UNSPECIFIED.);
#48=B_SPLINE_SURFACE_WITH_KNOTS('',1,3,((#49393,#49394,#49395,#49396,#49397,
#49398),(#49399,#49400,#49401,#49402,#49403,#49404)),.UNSPECIFIED.,.F.,
 .F.,.F.,(2,2),(4,2,4),(0.,1.),(0.,0.000207731735336673,0.000415463470673347),
 .UNSPECIFIED.);
#49=B_SPLINE_SURFACE_WITH_KNOTS('',1,3,((#49405,#49406,#49407,#49408,#49409,
#49410),(#49411,#49412,#49413,#49414,#49415,#49416)),.UNSPECIFIED.,.F.,
 .F.,.F.,(2,2),(4,2,4),(0.,1.),(0.,0.00017280922218594,0.000345618444371881),
 .UNSPECIFIED.);
#50=B_SPLINE_SURFACE_WITH_KNOTS('',1,3,((#49417,#49418,#49419,#49420,#49421,
#49422),(#49423,#49424,#49425,#49426,#49427,#49428)),.UNSPECIFIED.,.F.,
 .F.,.F.,(2,2),(4,2,4),(0.,1.),(0.,0.000190209786850495,0.00038041957370099),
 .UNSPECIFIED.);
#51=B_SPLINE_SURFACE_WITH_KNOTS('',1,3,((#49833,#49834,#49835,#49836),(#49837,
#49838,#49839,#49840)),.UNSPECIFIED.,.F.,.F.,.F.,(2,2),(4,4),(0.,1.),(0.,
0.0001836636850694),.UNSPECIFIED.);
#52=B_SPLINE_SURFACE_WITH_KNOTS('',1,3,((#49841,#49842,#49843,#49844,#49845,
#49846,#49847,#49848,#49849,#49850),(#49851,#49852,#49853,#49854,#49855,
#49856,#49857,#49858,#49859,#49860)),.UNSPECIFIED.,.F.,.F.,.F.,(2,2),(4,
2,2,2,4),(0.,1.),(0.,0.00013155640584323,0.000263112811686459,0.000394669217529689,
0.000526225623372918),.UNSPECIFIED.);
#53=B_SPLINE_SURFACE_WITH_KNOTS('',1,3,((#49861,#49862,#49863,#49864),(#49865,
#49866,#49867,#49868)),.UNSPECIFIED.,.F.,.F.,.F.,(2,2),(4,4),(0.,1.),(0.,
0.000230590169196254),.UNSPECIFIED.);
#54=B_SPLINE_SURFACE_WITH_KNOTS('',1,3,((#49869,#49870,#49871,#49872,#49873,
#49874),(#49875,#49876,#49877,#49878,#49879,#49880)),.UNSPECIFIED.,.F.,
 .F.,.F.,(2,2),(4,2,4),(0.,1.),(0.,0.000154736130843733,0.000309472261687467),
 .UNSPECIFIED.);
#55=B_SPLINE_SURFACE_WITH_KNOTS('',1,3,((#49881,#49882,#49883,#49884,#49885,
#49886),(#49887,#49888,#49889,#49890,#49891,#49892)),.UNSPECIFIED.,.F.,
 .F.,.F.,(2,2),(4,2,4),(0.,1.),(0.,0.000225296864609234,0.000450593729218469),
 .UNSPECIFIED.);
#56=B_SPLINE_SURFACE_WITH_KNOTS('',1,3,((#49893,#49894,#49895,#49896,#49897,
#49898),(#49899,#49900,#49901,#49902,#49903,#49904)),.UNSPECIFIED.,.F.,
 .F.,.F.,(2,2),(4,2,4),(0.,1.),(0.,0.000207731735336673,0.000415463470673347),
 .UNSPECIFIED.);
#57=B_SPLINE_SURFACE_WITH_KNOTS('',1,3,((#49905,#49906,#49907,#49908,#49909,
#49910),(#49911,#49912,#49913,#49914,#49915,#49916)),.UNSPECIFIED.,.F.,
 .F.,.F.,(2,2),(4,2,4),(0.,1.),(0.,0.00017280922218594,0.000345618444371881),
 .UNSPECIFIED.);
#58=B_SPLINE_SURFACE_WITH_KNOTS('',1,3,((#49917,#49918,#49919,#49920,#49921,
#49922),(#49923,#49924,#49925,#49926,#49927,#49928)),.UNSPECIFIED.,.F.,
 .F.,.F.,(2,2),(4,2,4),(0.,1.),(0.,0.000190209786850495,0.00038041957370099),
 .UNSPECIFIED.);
#59=B_SPLINE_SURFACE_WITH_KNOTS('',1,3,((#50324,#50325,#50326,#50327),(#50328,
#50329,#50330,#50331)),.UNSPECIFIED.,.F.,.F.,.F.,(2,2),(4,4),(0.,1.),(0.,
0.0001836636850694),.UNSPECIFIED.);
#60=B_SPLINE_SURFACE_WITH_KNOTS('',1,3,((#50332,#50333,#50334,#50335,#50336,
#50337,#50338,#50339,#50340,#50341),(#50342,#50343,#50344,#50345,#50346,
#50347,#50348,#50349,#50350,#50351)),.UNSPECIFIED.,.F.,.F.,.F.,(2,2),(4,
2,2,2,4),(0.,1.),(0.,0.00013155640584323,0.000263112811686459,0.000394669217529689,
0.000526225623372918),.UNSPECIFIED.);
#61=B_SPLINE_SURFACE_WITH_KNOTS('',1,3,((#50352,#50353,#50354,#50355),(#50356,
#50357,#50358,#50359)),.UNSPECIFIED.,.F.,.F.,.F.,(2,2),(4,4),(0.,1.),(0.,
0.000230590169196254),.UNSPECIFIED.);
#62=B_SPLINE_SURFACE_WITH_KNOTS('',1,3,((#50360,#50361,#50362,#50363,#50364,
#50365),(#50366,#50367,#50368,#50369,#50370,#50371)),.UNSPECIFIED.,.F.,
 .F.,.F.,(2,2),(4,2,4),(0.,1.),(0.,0.000154736130843733,0.000309472261687467),
 .UNSPECIFIED.);
#63=B_SPLINE_SURFACE_WITH_KNOTS('',1,3,((#50372,#50373,#50374,#50375,#50376,
#50377),(#50378,#50379,#50380,#50381,#50382,#50383)),.UNSPECIFIED.,.F.,
 .F.,.F.,(2,2),(4,2,4),(0.,1.),(0.,0.000225296864609234,0.000450593729218469),
 .UNSPECIFIED.);
#64=B_SPLINE_SURFACE_WITH_KNOTS('',1,3,((#50384,#50385,#50386,#50387,#50388,
#50389),(#50390,#50391,#50392,#50393,#50394,#50395)),.UNSPECIFIED.,.F.,
 .F.,.F.,(2,2),(4,2,4),(0.,1.),(0.,0.000207731735336673,0.000415463470673347),
 .UNSPECIFIED.);
#65=B_SPLINE_SURFACE_WITH_KNOTS('',1,3,((#50396,#50397,#50398,#50399,#50400,
#50401),(#50402,#50403,#50404,#50405,#50406,#50407)),.UNSPECIFIED.,.F.,
 .F.,.F.,(2,2),(4,2,4),(0.,1.),(0.,0.00017280922218594,0.000345618444371881),
 .UNSPECIFIED.);
#66=B_SPLINE_SURFACE_WITH_KNOTS('',1,3,((#50408,#50409,#50410,#50411,#50412,
#50413),(#50414,#50415,#50416,#50417,#50418,#50419)),.UNSPECIFIED.,.F.,
 .F.,.F.,(2,2),(4,2,4),(0.,1.),(0.,0.000190209786850495,0.00038041957370099),
 .UNSPECIFIED.);
#67=B_SPLINE_SURFACE_WITH_KNOTS('',1,3,((#50823,#50824,#50825,#50826),(#50827,
#50828,#50829,#50830)),.UNSPECIFIED.,.F.,.F.,.F.,(2,2),(4,4),(0.,1.),(0.,
0.0001836636850694),.UNSPECIFIED.);
#68=B_SPLINE_SURFACE_WITH_KNOTS('',1,3,((#50831,#50832,#50833,#50834,#50835,
#50836,#50837,#50838,#50839,#50840),(#50841,#50842,#50843,#50844,#50845,
#50846,#50847,#50848,#50849,#50850)),.UNSPECIFIED.,.F.,.F.,.F.,(2,2),(4,
2,2,2,4),(0.,1.),(0.,0.00013155640584323,0.000263112811686459,0.000394669217529689,
0.000526225623372918),.UNSPECIFIED.);
#69=B_SPLINE_SURFACE_WITH_KNOTS('',1,3,((#50851,#50852,#50853,#50854),(#50855,
#50856,#50857,#50858)),.UNSPECIFIED.,.F.,.F.,.F.,(2,2),(4,4),(0.,1.),(0.,
0.000230590169196254),.UNSPECIFIED.);
#70=B_SPLINE_SURFACE_WITH_KNOTS('',1,3,((#50859,#50860,#50861,#50862,#50863,
#50864),(#50865,#50866,#50867,#50868,#50869,#50870)),.UNSPECIFIED.,.F.,
 .F.,.F.,(2,2),(4,2,4),(0.,1.),(0.,0.000154736130843733,0.000309472261687467),
 .UNSPECIFIED.);
#71=B_SPLINE_SURFACE_WITH_KNOTS('',1,3,((#50871,#50872,#50873,#50874,#50875,
#50876),(#50877,#50878,#50879,#50880,#50881,#50882)),.UNSPECIFIED.,.F.,
 .F.,.F.,(2,2),(4,2,4),(0.,1.),(0.,0.000225296864609234,0.000450593729218469),
 .UNSPECIFIED.);
#72=B_SPLINE_SURFACE_WITH_KNOTS('',1,3,((#50883,#50884,#50885,#50886,#50887,
#50888),(#50889,#50890,#50891,#50892,#50893,#50894)),.UNSPECIFIED.,.F.,
 .F.,.F.,(2,2),(4,2,4),(0.,1.),(0.,0.000207731735336673,0.000415463470673347),
 .UNSPECIFIED.);
#73=B_SPLINE_SURFACE_WITH_KNOTS('',1,3,((#50895,#50896,#50897,#50898,#50899,
#50900),(#50901,#50902,#50903,#50904,#50905,#50906)),.UNSPECIFIED.,.F.,
 .F.,.F.,(2,2),(4,2,4),(0.,1.),(0.,0.00017280922218594,0.000345618444371881),
 .UNSPECIFIED.);
#74=B_SPLINE_SURFACE_WITH_KNOTS('',1,3,((#50907,#50908,#50909,#50910,#50911,
#50912),(#50913,#50914,#50915,#50916,#50917,#50918)),.UNSPECIFIED.,.F.,
 .F.,.F.,(2,2),(4,2,4),(0.,1.),(0.,0.000190209786850495,0.00038041957370099),
 .UNSPECIFIED.);
#75=B_SPLINE_SURFACE_WITH_KNOTS('',1,3,((#51282,#51283,#51284,#51285),(#51286,
#51287,#51288,#51289)),.UNSPECIFIED.,.F.,.F.,.F.,(2,2),(4,4),(0.,1.),(0.,
0.0001836636850694),.UNSPECIFIED.);
#76=B_SPLINE_SURFACE_WITH_KNOTS('',1,3,((#51290,#51291,#51292,#51293,#51294,
#51295,#51296,#51297,#51298,#51299),(#51300,#51301,#51302,#51303,#51304,
#51305,#51306,#51307,#51308,#51309)),.UNSPECIFIED.,.F.,.F.,.F.,(2,2),(4,
2,2,2,4),(0.,1.),(0.,0.00013155640584323,0.000263112811686459,0.000394669217529689,
0.000526225623372918),.UNSPECIFIED.);
#77=B_SPLINE_SURFACE_WITH_KNOTS('',1,3,((#51310,#51311,#51312,#51313),(#51314,
#51315,#51316,#51317)),.UNSPECIFIED.,.F.,.F.,.F.,(2,2),(4,4),(0.,1.),(0.,
0.000230590169196254),.UNSPECIFIED.);
#78=B_SPLINE_SURFACE_WITH_KNOTS('',1,3,((#51318,#51319,#51320,#51321,#51322,
#51323),(#51324,#51325,#51326,#51327,#51328,#51329)),.UNSPECIFIED.,.F.,
 .F.,.F.,(2,2),(4,2,4),(0.,1.),(0.,0.000154736130843733,0.000309472261687467),
 .UNSPECIFIED.);
#79=B_SPLINE_SURFACE_WITH_KNOTS('',1,3,((#51330,#51331,#51332,#51333,#51334,
#51335),(#51336,#51337,#51338,#51339,#51340,#51341)),.UNSPECIFIED.,.F.,
 .F.,.F.,(2,2),(4,2,4),(0.,1.),(0.,0.000225296864609234,0.000450593729218469),
 .UNSPECIFIED.);
#80=B_SPLINE_SURFACE_WITH_KNOTS('',1,3,((#51342,#51343,#51344,#51345,#51346,
#51347),(#51348,#51349,#51350,#51351,#51352,#51353)),.UNSPECIFIED.,.F.,
 .F.,.F.,(2,2),(4,2,4),(0.,1.),(0.,0.000207731735336673,0.000415463470673347),
 .UNSPECIFIED.);
#81=B_SPLINE_SURFACE_WITH_KNOTS('',1,3,((#51354,#51355,#51356,#51357,#51358,
#51359),(#51360,#51361,#51362,#51363,#51364,#51365)),.UNSPECIFIED.,.F.,
 .F.,.F.,(2,2),(4,2,4),(0.,1.),(0.,0.00017280922218594,0.000345618444371881),
 .UNSPECIFIED.);
#82=B_SPLINE_SURFACE_WITH_KNOTS('',1,3,((#51366,#51367,#51368,#51369,#51370,
#51371),(#51372,#51373,#51374,#51375,#51376,#51377)),.UNSPECIFIED.,.F.,
 .F.,.F.,(2,2),(4,2,4),(0.,1.),(0.,0.000190209786850495,0.00038041957370099),
 .UNSPECIFIED.);
#83=CYLINDRICAL_SURFACE('',#31252,43.18);
#84=CYLINDRICAL_SURFACE('',#31427,43.18);
#85=CYLINDRICAL_SURFACE('',#31601,43.18);
#86=CYLINDRICAL_SURFACE('',#31773,43.18);
#87=CYLINDRICAL_SURFACE('',#31947,43.18);
#88=CYLINDRICAL_SURFACE('',#32119,43.18);
#89=CYLINDRICAL_SURFACE('',#32293,43.18);
#90=CYLINDRICAL_SURFACE('',#32454,43.18);
#91=B_SPLINE_CURVE_WITH_KNOTS('',3,(#41170,#41171,#41172,#41173,#41174,
#41175,#41176),.UNSPECIFIED.,.F.,.F.,(4,3,4),(0.0013944834746614,0.00156869861718197,
0.00174191494642305),.UNSPECIFIED.);
#92=B_SPLINE_CURVE_WITH_KNOTS('',3,(#41180,#41181,#41182,#41183,#41184,
#41185,#41186),.UNSPECIFIED.,.F.,.F.,(4,3,4),(0.0013944834746614,0.00156869861718197,
0.00174191494642305),.UNSPECIFIED.);
#93=B_SPLINE_CURVE_WITH_KNOTS('',3,(#41210,#41211,#41212,#41213,#41214,
#41215,#41216,#41217,#41218,#41219),.UNSPECIFIED.,.F.,.F.,(4,2,2,2,4),(0.,
0.00526042011316327,0.0104716694063339,0.015690408437739,0.0209439877848333),
 .UNSPECIFIED.);
#94=B_SPLINE_CURVE_WITH_KNOTS('',3,(#41230,#41231,#41232,#41233,#41234,
#41235,#41236,#41237,#41238,#41239,#41240,#41241,#41242),.UNSPECIFIED.,
 .F.,.F.,(4,3,3,3,4),(0.,0.000118699284007367,0.000237398568014735,0.000356097852022102,
0.000474797136029469),.UNSPECIFIED.);
#95=B_SPLINE_CURVE_WITH_KNOTS('',3,(#41247,#41248,#41249,#41250,#41251,
#41252,#41253),.UNSPECIFIED.,.F.,.F.,(4,3,4),(0.00113228003473031,0.00127403420813048,
0.00141578838153066),.UNSPECIFIED.);
#96=B_SPLINE_CURVE_WITH_KNOTS('',3,(#41264,#41265,#41266,#41267,#41268,
#41269,#41270),.UNSPECIFIED.,.F.,.F.,(4,3,4),(0.,0.000203066032551723,0.000406132065103445),
 .UNSPECIFIED.);
#97=B_SPLINE_CURVE_WITH_KNOTS('',3,(#41275,#41276,#41277,#41278,#41279,
#41280,#41281),.UNSPECIFIED.,.F.,.F.,(4,3,4),(0.00126502789080594,0.00142320799292252,
0.0015813880950391),.UNSPECIFIED.);
#98=B_SPLINE_CURVE_WITH_KNOTS('',3,(#41292,#41293,#41294,#41295,#41296,
#41297,#41298),.UNSPECIFIED.,.F.,.F.,(4,3,4),(0.,0.000187283681607414,0.000374567363214827),
 .UNSPECIFIED.);
#99=B_SPLINE_CURVE_WITH_KNOTS('',3,(#41527,#41528,#41529,#41530,#41531,
#41532,#41533,#41534,#41535,#41536,#41537,#41538,#41539),.UNSPECIFIED.,
 .F.,.F.,(4,3,3,3,4),(0.,0.000118699284007367,0.000237398568014735,0.000356097852022102,
0.000474797136029469),.UNSPECIFIED.);
#100=B_SPLINE_CURVE_WITH_KNOTS('',3,(#41550,#41551,#41552,#41553,#41554,
#41555,#41556,#41557,#41558,#41559),.UNSPECIFIED.,.F.,.F.,(4,2,2,2,4),(0.,
0.00526042011316612,0.010471669406343,0.015690408437749,0.0209439877848476),
 .UNSPECIFIED.);
#101=B_SPLINE_CURVE_WITH_KNOTS('',3,(#41564,#41565,#41566,#41567,#41568,
#41569,#41570),.UNSPECIFIED.,.F.,.F.,(4,3,4),(0.,0.000203066032551723,0.000406132065103445),
 .UNSPECIFIED.);
#102=B_SPLINE_CURVE_WITH_KNOTS('',3,(#41581,#41582,#41583,#41584,#41585,
#41586,#41587),.UNSPECIFIED.,.F.,.F.,(4,3,4),(0.00113228003473031,0.00127403420813048,
0.00141578838153066),.UNSPECIFIED.);
#103=B_SPLINE_CURVE_WITH_KNOTS('',3,(#41592,#41593,#41594,#41595,#41596,
#41597,#41598),.UNSPECIFIED.,.F.,.F.,(4,3,4),(0.,0.000187283681607414,0.000374567363214827),
 .UNSPECIFIED.);
#104=B_SPLINE_CURVE_WITH_KNOTS('',3,(#41609,#41610,#41611,#41612,#41613,
#41614,#41615),.UNSPECIFIED.,.F.,.F.,(4,3,4),(0.00126502789080594,0.00142320799292252,
0.0015813880950391),.UNSPECIFIED.);
#105=B_SPLINE_CURVE_WITH_KNOTS('',3,(#41980,#41981,#41982,#41983,#41984,
#41985,#41986),.UNSPECIFIED.,.F.,.F.,(4,3,4),(0.0013944834746614,0.00156869861718196,
0.00174191494642305),.UNSPECIFIED.);
#106=B_SPLINE_CURVE_WITH_KNOTS('',3,(#41990,#41991,#41992,#41993,#41994,
#41995,#41996),.UNSPECIFIED.,.F.,.F.,(4,3,4),(0.0013944834746614,0.00156869861718198,
0.00174191494642305),.UNSPECIFIED.);
#107=B_SPLINE_CURVE_WITH_KNOTS('',3,(#42020,#42021,#42022,#42023,#42024,
#42025,#42026,#42027,#42028,#42029),.UNSPECIFIED.,.F.,.F.,(4,2,2,2,4),(0.,
0.00526042011316214,0.0104716694063288,0.0156904084377356,0.0209439877848299),
 .UNSPECIFIED.);
#108=B_SPLINE_CURVE_WITH_KNOTS('',3,(#42040,#42041,#42042,#42043,#42044,
#42045,#42046,#42047,#42048,#42049,#42050,#42051,#42052),.UNSPECIFIED.,
 .F.,.F.,(4,3,3,3,4),(0.,0.000118699284007367,0.000237398568014734,0.000356097852022101,
0.000474797136029468),.UNSPECIFIED.);
#109=B_SPLINE_CURVE_WITH_KNOTS('',3,(#42057,#42058,#42059,#42060,#42061,
#42062,#42063),.UNSPECIFIED.,.F.,.F.,(4,3,4),(0.00113228003473031,0.00127403420813048,
0.00141578838153066),.UNSPECIFIED.);
#110=B_SPLINE_CURVE_WITH_KNOTS('',3,(#42074,#42075,#42076,#42077,#42078,
#42079,#42080),.UNSPECIFIED.,.F.,.F.,(4,3,4),(0.,0.000203066032551729,0.000406132065103457),
 .UNSPECIFIED.);
#111=B_SPLINE_CURVE_WITH_KNOTS('',3,(#42085,#42086,#42087,#42088,#42089,
#42090,#42091),.UNSPECIFIED.,.F.,.F.,(4,3,4),(0.00126502789080594,0.00142320799292253,
0.00158138809503911),.UNSPECIFIED.);
#112=B_SPLINE_CURVE_WITH_KNOTS('',3,(#42102,#42103,#42104,#42105,#42106,
#42107,#42108),.UNSPECIFIED.,.F.,.F.,(4,3,4),(0.,0.000187283681607407,0.000374567363214814),
 .UNSPECIFIED.);
#113=B_SPLINE_CURVE_WITH_KNOTS('',3,(#42337,#42338,#42339,#42340,#42341,
#42342,#42343,#42344,#42345,#42346,#42347,#42348,#42349),.UNSPECIFIED.,
 .F.,.F.,(4,3,3,3,4),(0.,0.00011869928400736,0.000237398568014721,0.000356097852022082,
0.000474797136029442),.UNSPECIFIED.);
#114=B_SPLINE_CURVE_WITH_KNOTS('',3,(#42360,#42361,#42362,#42363,#42364,
#42365,#42366,#42367,#42368,#42369),.UNSPECIFIED.,.F.,.F.,(4,2,2,2,4),(0.,
0.00526042011315895,0.0104716694063178,0.0156904084377192,0.0209439877848184),
 .UNSPECIFIED.);
#115=B_SPLINE_CURVE_WITH_KNOTS('',3,(#42374,#42375,#42376,#42377,#42378,
#42379,#42380),.UNSPECIFIED.,.F.,.F.,(4,3,4),(0.,0.000203066032551728,0.000406132065103456),
 .UNSPECIFIED.);
#116=B_SPLINE_CURVE_WITH_KNOTS('',3,(#42391,#42392,#42393,#42394,#42395,
#42396,#42397),.UNSPECIFIED.,.F.,.F.,(4,3,4),(0.00113228003473031,0.00127403420813048,
0.00141578838153065),.UNSPECIFIED.);
#117=B_SPLINE_CURVE_WITH_KNOTS('',3,(#42402,#42403,#42404,#42405,#42406,
#42407,#42408),.UNSPECIFIED.,.F.,.F.,(4,3,4),(0.,0.000187283681607415,0.00037456736321483),
 .UNSPECIFIED.);
#118=B_SPLINE_CURVE_WITH_KNOTS('',3,(#42419,#42420,#42421,#42422,#42423,
#42424,#42425),.UNSPECIFIED.,.F.,.F.,(4,3,4),(0.00126502789080594,0.00142320799292252,
0.00158138809503909),.UNSPECIFIED.);
#119=B_SPLINE_CURVE_WITH_KNOTS('',3,(#42790,#42791,#42792,#42793,#42794,
#42795,#42796),.UNSPECIFIED.,.F.,.F.,(4,3,4),(0.0013944834746614,0.00156869861718197,
0.00174191494642305),.UNSPECIFIED.);
#120=B_SPLINE_CURVE_WITH_KNOTS('',3,(#42800,#42801,#42802,#42803,#42804,
#42805,#42806),.UNSPECIFIED.,.F.,.F.,(4,3,4),(0.0013944834746614,0.00156869861718197,
0.00174191494642305),.UNSPECIFIED.);
#121=B_SPLINE_CURVE_WITH_KNOTS('',3,(#42830,#42831,#42832,#42833,#42834,
#42835,#42836,#42837,#42838,#42839),.UNSPECIFIED.,.F.,.F.,(4,2,2,2,4),(0.,
0.00526042011316327,0.0104716694063339,0.0156904084377389,0.0209439877848332),
 .UNSPECIFIED.);
#122=B_SPLINE_CURVE_WITH_KNOTS('',3,(#42850,#42851,#42852,#42853,#42854,
#42855,#42856,#42857,#42858,#42859,#42860,#42861,#42862),.UNSPECIFIED.,
 .F.,.F.,(4,3,3,3,4),(0.,0.000118699284007367,0.000237398568014735,0.000356097852022102,
0.000474797136029469),.UNSPECIFIED.);
#123=B_SPLINE_CURVE_WITH_KNOTS('',3,(#42867,#42868,#42869,#42870,#42871,
#42872,#42873),.UNSPECIFIED.,.F.,.F.,(4,3,4),(0.00113228003473031,0.00127403420813048,
0.00141578838153066),.UNSPECIFIED.);
#124=B_SPLINE_CURVE_WITH_KNOTS('',3,(#42884,#42885,#42886,#42887,#42888,
#42889,#42890),.UNSPECIFIED.,.F.,.F.,(4,3,4),(0.,0.000203066032551723,0.000406132065103445),
 .UNSPECIFIED.);
#125=B_SPLINE_CURVE_WITH_KNOTS('',3,(#42895,#42896,#42897,#42898,#42899,
#42900,#42901),.UNSPECIFIED.,.F.,.F.,(4,3,4),(0.00126502789080594,0.00142320799292252,
0.0015813880950391),.UNSPECIFIED.);
#126=B_SPLINE_CURVE_WITH_KNOTS('',3,(#42912,#42913,#42914,#42915,#42916,
#42917,#42918),.UNSPECIFIED.,.F.,.F.,(4,3,4),(0.,0.000187283681607414,0.000374567363214827),
 .UNSPECIFIED.);
#127=B_SPLINE_CURVE_WITH_KNOTS('',3,(#43147,#43148,#43149,#43150,#43151,
#43152,#43153,#43154,#43155,#43156,#43157,#43158,#43159),.UNSPECIFIED.,
 .F.,.F.,(4,3,3,3,4),(0.,0.000118699284007367,0.000237398568014735,0.000356097852022102,
0.000474797136029469),.UNSPECIFIED.);
#128=B_SPLINE_CURVE_WITH_KNOTS('',3,(#43170,#43171,#43172,#43173,#43174,
#43175,#43176,#43177,#43178,#43179),.UNSPECIFIED.,.F.,.F.,(4,2,2,2,4),(0.,
0.00526042011316631,0.0104716694063484,0.015690408437764,0.0209439877848659),
 .UNSPECIFIED.);
#129=B_SPLINE_CURVE_WITH_KNOTS('',3,(#43184,#43185,#43186,#43187,#43188,
#43189,#43190),.UNSPECIFIED.,.F.,.F.,(4,3,4),(0.,0.000203066032551723,0.000406132065103445),
 .UNSPECIFIED.);
#130=B_SPLINE_CURVE_WITH_KNOTS('',3,(#43201,#43202,#43203,#43204,#43205,
#43206,#43207),.UNSPECIFIED.,.F.,.F.,(4,3,4),(0.00113228003473031,0.00127403420813048,
0.00141578838153066),.UNSPECIFIED.);
#131=B_SPLINE_CURVE_WITH_KNOTS('',3,(#43212,#43213,#43214,#43215,#43216,
#43217,#43218),.UNSPECIFIED.,.F.,.F.,(4,3,4),(0.,0.000187283681607414,0.000374567363214827),
 .UNSPECIFIED.);
#132=B_SPLINE_CURVE_WITH_KNOTS('',3,(#43229,#43230,#43231,#43232,#43233,
#43234,#43235),.UNSPECIFIED.,.F.,.F.,(4,3,4),(0.00126502789080594,0.00142320799292252,
0.0015813880950391),.UNSPECIFIED.);
#133=B_SPLINE_CURVE_WITH_KNOTS('',3,(#43532,#43533,#43534,#43535,#43536,
#43537,#43538),.UNSPECIFIED.,.F.,.F.,(4,3,4),(0.0013944834746614,0.00156869861718196,
0.00174191494642305),.UNSPECIFIED.);
#134=B_SPLINE_CURVE_WITH_KNOTS('',3,(#43542,#43543,#43544,#43545,#43546,
#43547,#43548),.UNSPECIFIED.,.F.,.F.,(4,3,4),(0.0013944834746614,0.00156869861718197,
0.00174191494642305),.UNSPECIFIED.);
#135=B_SPLINE_CURVE_WITH_KNOTS('',3,(#43572,#43573,#43574,#43575,#43576,
#43577,#43578,#43579,#43580,#43581),.UNSPECIFIED.,.F.,.F.,(4,2,2,2,4),(0.,
0.00526042011315947,0.0104716694063231,0.015690408437722,0.0209439877848092),
 .UNSPECIFIED.);
#136=B_SPLINE_CURVE_WITH_KNOTS('',3,(#43592,#43593,#43594,#43595,#43596,
#43597,#43598,#43599,#43600,#43601,#43602,#43603,#43604),.UNSPECIFIED.,
 .F.,.F.,(4,3,3,3,4),(0.,0.000118699284007361,0.000237398568014722,0.000356097852022083,
0.000474797136029444),.UNSPECIFIED.);
#137=B_SPLINE_CURVE_WITH_KNOTS('',3,(#43609,#43610,#43611,#43612,#43613,
#43614,#43615),.UNSPECIFIED.,.F.,.F.,(4,3,4),(0.00113228003473031,0.00127403420813048,
0.00141578838153066),.UNSPECIFIED.);
#138=B_SPLINE_CURVE_WITH_KNOTS('',3,(#43626,#43627,#43628,#43629,#43630,
#43631,#43632),.UNSPECIFIED.,.F.,.F.,(4,3,4),(0.,0.000203066032551722,0.000406132065103444),
 .UNSPECIFIED.);
#139=B_SPLINE_CURVE_WITH_KNOTS('',3,(#43637,#43638,#43639,#43640,#43641,
#43642,#43643),.UNSPECIFIED.,.F.,.F.,(4,3,4),(0.00126502789080594,0.00142320799292253,
0.00158138809503912),.UNSPECIFIED.);
#140=B_SPLINE_CURVE_WITH_KNOTS('',3,(#43654,#43655,#43656,#43657,#43658,
#43659,#43660),.UNSPECIFIED.,.F.,.F.,(4,3,4),(0.,0.000187283681607412,0.000374567363214824),
 .UNSPECIFIED.);
#141=B_SPLINE_CURVE_WITH_KNOTS('',3,(#43873,#43874,#43875,#43876,#43877,
#43878,#43879,#43880,#43881,#43882,#43883,#43884,#43885),.UNSPECIFIED.,
 .F.,.F.,(4,3,3,3,4),(0.,0.000118699284007364,0.000237398568014728,0.000356097852022092,
0.000474797136029457),.UNSPECIFIED.);
#142=B_SPLINE_CURVE_WITH_KNOTS('',3,(#43896,#43897,#43898,#43899,#43900,
#43901,#43902,#43903,#43904,#43905),.UNSPECIFIED.,.F.,.F.,(4,2,2,2,4),(0.,
0.00526042011316192,0.0104716694063336,0.0156904084377461,0.0209439877848426),
 .UNSPECIFIED.);
#143=B_SPLINE_CURVE_WITH_KNOTS('',3,(#43910,#43911,#43912,#43913,#43914,
#43915,#43916),.UNSPECIFIED.,.F.,.F.,(4,3,4),(0.,0.000203066032551723,0.000406132065103445),
 .UNSPECIFIED.);
#144=B_SPLINE_CURVE_WITH_KNOTS('',3,(#43927,#43928,#43929,#43930,#43931,
#43932,#43933),.UNSPECIFIED.,.F.,.F.,(4,3,4),(0.00113228003473031,0.00127403420813048,
0.00141578838153066),.UNSPECIFIED.);
#145=B_SPLINE_CURVE_WITH_KNOTS('',3,(#43938,#43939,#43940,#43941,#43942,
#43943,#43944),.UNSPECIFIED.,.F.,.F.,(4,3,4),(0.,0.000187283681607418,0.000374567363214837),
 .UNSPECIFIED.);
#146=B_SPLINE_CURVE_WITH_KNOTS('',3,(#43955,#43956,#43957,#43958,#43959,
#43960,#43961),.UNSPECIFIED.,.F.,.F.,(4,3,4),(0.00126502789080594,0.00142320799292252,
0.0015813880950391),.UNSPECIFIED.);
#147=B_SPLINE_CURVE_WITH_KNOTS('',3,(#44181,#44182,#44183,#44184,#44185,
#44186),.UNSPECIFIED.,.F.,.F.,(4,2,4),(0.,0.000190134978024329,0.000380269956048659),
 .UNSPECIFIED.);
#148=B_SPLINE_CURVE_WITH_KNOTS('',3,(#44190,#44191,#44192,#44193,#44194,
#44195),.UNSPECIFIED.,.F.,.F.,(4,2,4),(0.,0.000190134978024329,0.000380269956048659),
 .UNSPECIFIED.);
#149=B_SPLINE_CURVE_WITH_KNOTS('',3,(#44201,#44202,#44203,#44204,#44205,
#44206,#44207,#44208,#44209,#44210),.UNSPECIFIED.,.F.,.F.,(4,2,2,2,4),(0.,
0.000131545758044192,0.000263091516088384,0.000394637274132577,0.000526183032176769),
 .UNSPECIFIED.);
#150=B_SPLINE_CURVE_WITH_KNOTS('',3,(#44221,#44222,#44223,#44224,#44225,
#44226,#44227,#44228,#44229,#44230),.UNSPECIFIED.,.F.,.F.,(4,2,2,2,4),(0.,
0.00582165875416865,0.0116046152377829,0.0173793076659593,0.0232084247026302),
 .UNSPECIFIED.);
#151=B_SPLINE_CURVE_WITH_KNOTS('',3,(#44241,#44242,#44243,#44244,#44245,
#44246),.UNSPECIFIED.,.F.,.F.,(4,2,4),(0.,0.000225062726248243,0.000450125452496486),
 .UNSPECIFIED.);
#152=B_SPLINE_CURVE_WITH_KNOTS('',3,(#44257,#44258,#44259,#44260,#44261,
#44262),.UNSPECIFIED.,.F.,.F.,(4,2,4),(0.,0.000154705575294623,0.000309411150589247),
 .UNSPECIFIED.);
#153=B_SPLINE_CURVE_WITH_KNOTS('',3,(#44475,#44476,#44477,#44478,#44479,
#44480),.UNSPECIFIED.,.F.,.F.,(4,2,4),(0.,0.000172936470548356,0.000345872941096713),
 .UNSPECIFIED.);
#154=B_SPLINE_CURVE_WITH_KNOTS('',3,(#44484,#44485,#44486,#44487,#44488,
#44489),.UNSPECIFIED.,.F.,.F.,(4,2,4),(0.,0.000207571827648373,0.000415143655296747),
 .UNSPECIFIED.);
#155=B_SPLINE_CURVE_WITH_KNOTS('',3,(#44501,#44502,#44503,#44504,#44505,
#44506,#44507,#44508,#44509,#44510),.UNSPECIFIED.,.F.,.F.,(4,2,2,2,4),(0.,
0.00582165875416865,0.0116046152377829,0.0173793076659593,0.0232084247026302),
 .UNSPECIFIED.);
#156=B_SPLINE_CURVE_WITH_KNOTS('',3,(#44521,#44522,#44523,#44524,#44525,
#44526,#44527,#44528,#44529,#44530),.UNSPECIFIED.,.F.,.F.,(4,2,2,2,4),(0.,
0.000131545758044192,0.000263091516088384,0.000394637274132577,0.000526183032176769),
 .UNSPECIFIED.);
#157=B_SPLINE_CURVE_WITH_KNOTS('',3,(#44541,#44542,#44543,#44544,#44545,
#44546),.UNSPECIFIED.,.F.,.F.,(4,2,4),(0.,0.000154705575294623,0.000309411150589247),
 .UNSPECIFIED.);
#158=B_SPLINE_CURVE_WITH_KNOTS('',3,(#44557,#44558,#44559,#44560,#44561,
#44562),.UNSPECIFIED.,.F.,.F.,(4,2,4),(0.,0.000225062726248243,0.000450125452496486),
 .UNSPECIFIED.);
#159=B_SPLINE_CURVE_WITH_KNOTS('',3,(#44783,#44784,#44785,#44786,#44787,
#44788),.UNSPECIFIED.,.F.,.F.,(4,2,4),(0.,0.000207571827648373,0.000415143655296747),
 .UNSPECIFIED.);
#160=B_SPLINE_CURVE_WITH_KNOTS('',3,(#44791,#44792,#44793,#44794,#44795,
#44796),.UNSPECIFIED.,.F.,.F.,(4,2,4),(0.,0.000172936470548356,0.000345872941096713),
 .UNSPECIFIED.);
#161=B_SPLINE_CURVE_WITH_KNOTS('',3,(#44987,#44988,#44989,#44990,#44991,
#44992),.UNSPECIFIED.,.F.,.F.,(4,2,4),(0.,0.000190134978024329,0.000380269956048659),
 .UNSPECIFIED.);
#162=B_SPLINE_CURVE_WITH_KNOTS('',3,(#44996,#44997,#44998,#44999,#45000,
#45001),.UNSPECIFIED.,.F.,.F.,(4,2,4),(0.,0.000190134978024329,0.000380269956048659),
 .UNSPECIFIED.);
#163=B_SPLINE_CURVE_WITH_KNOTS('',3,(#45007,#45008,#45009,#45010,#45011,
#45012,#45013,#45014,#45015,#45016),.UNSPECIFIED.,.F.,.F.,(4,2,2,2,4),(0.,
0.000131545758044194,0.000263091516088388,0.000394637274132582,0.000526183032176776),
 .UNSPECIFIED.);
#164=B_SPLINE_CURVE_WITH_KNOTS('',3,(#45027,#45028,#45029,#45030,#45031,
#45032,#45033,#45034,#45035,#45036),.UNSPECIFIED.,.F.,.F.,(4,2,2,2,4),(0.,
0.00582165875416772,0.0116046152377756,0.0173793076659416,0.0232084247026066),
 .UNSPECIFIED.);
#165=B_SPLINE_CURVE_WITH_KNOTS('',3,(#45047,#45048,#45049,#45050,#45051,
#45052),.UNSPECIFIED.,.F.,.F.,(4,2,4),(0.,0.000225062726248249,0.000450125452496499),
 .UNSPECIFIED.);
#166=B_SPLINE_CURVE_WITH_KNOTS('',3,(#45063,#45064,#45065,#45066,#45067,
#45068),.UNSPECIFIED.,.F.,.F.,(4,2,4),(0.,0.000154705575294622,0.000309411150589244),
 .UNSPECIFIED.);
#167=B_SPLINE_CURVE_WITH_KNOTS('',3,(#45281,#45282,#45283,#45284,#45285,
#45286),.UNSPECIFIED.,.F.,.F.,(4,2,4),(0.,0.000172936470548357,0.000345872941096714),
 .UNSPECIFIED.);
#168=B_SPLINE_CURVE_WITH_KNOTS('',3,(#45290,#45291,#45292,#45293,#45294,
#45295),.UNSPECIFIED.,.F.,.F.,(4,2,4),(0.,0.000207571827648373,0.000415143655296746),
 .UNSPECIFIED.);
#169=B_SPLINE_CURVE_WITH_KNOTS('',3,(#45307,#45308,#45309,#45310,#45311,
#45312,#45313,#45314,#45315,#45316),.UNSPECIFIED.,.F.,.F.,(4,2,2,2,4),(0.,
0.0058216587541681,0.0116046152377789,0.0173793076659542,0.0232084247026242),
 .UNSPECIFIED.);
#170=B_SPLINE_CURVE_WITH_KNOTS('',3,(#45327,#45328,#45329,#45330,#45331,
#45332,#45333,#45334,#45335,#45336),.UNSPECIFIED.,.F.,.F.,(4,2,2,2,4),(0.,
0.000131545758044202,0.000263091516088404,0.000394637274132606,0.000526183032176808),
 .UNSPECIFIED.);
#171=B_SPLINE_CURVE_WITH_KNOTS('',3,(#45347,#45348,#45349,#45350,#45351,
#45352),.UNSPECIFIED.,.F.,.F.,(4,2,4),(0.,0.000154705575294617,0.000309411150589234),
 .UNSPECIFIED.);
#172=B_SPLINE_CURVE_WITH_KNOTS('',3,(#45363,#45364,#45365,#45366,#45367,
#45368),.UNSPECIFIED.,.F.,.F.,(4,2,4),(0.,0.000225062726248255,0.00045012545249651),
 .UNSPECIFIED.);
#173=B_SPLINE_CURVE_WITH_KNOTS('',3,(#45589,#45590,#45591,#45592,#45593,
#45594),.UNSPECIFIED.,.F.,.F.,(4,2,4),(0.,0.000207571827648389,0.000415143655296778),
 .UNSPECIFIED.);
#174=B_SPLINE_CURVE_WITH_KNOTS('',3,(#45597,#45598,#45599,#45600,#45601,
#45602),.UNSPECIFIED.,.F.,.F.,(4,2,4),(0.,0.000172936470548352,0.000345872941096704),
 .UNSPECIFIED.);
#175=B_SPLINE_CURVE_WITH_KNOTS('',3,(#45793,#45794,#45795,#45796,#45797,
#45798),.UNSPECIFIED.,.F.,.F.,(4,2,4),(0.,0.000190134978024329,0.000380269956048659),
 .UNSPECIFIED.);
#176=B_SPLINE_CURVE_WITH_KNOTS('',3,(#45802,#45803,#45804,#45805,#45806,
#45807),.UNSPECIFIED.,.F.,.F.,(4,2,4),(0.,0.000190134978024329,0.000380269956048659),
 .UNSPECIFIED.);
#177=B_SPLINE_CURVE_WITH_KNOTS('',3,(#45813,#45814,#45815,#45816,#45817,
#45818,#45819,#45820,#45821,#45822),.UNSPECIFIED.,.F.,.F.,(4,2,2,2,4),(0.,
0.000131545758044192,0.000263091516088384,0.000394637274132577,0.000526183032176769),
 .UNSPECIFIED.);
#178=B_SPLINE_CURVE_WITH_KNOTS('',3,(#45833,#45834,#45835,#45836,#45837,
#45838,#45839,#45840,#45841,#45842),.UNSPECIFIED.,.F.,.F.,(4,2,2,2,4),(0.,
0.00582165875416865,0.0116046152377829,0.0173793076659594,0.0232084247026305),
 .UNSPECIFIED.);
#179=B_SPLINE_CURVE_WITH_KNOTS('',3,(#45853,#45854,#45855,#45856,#45857,
#45858),.UNSPECIFIED.,.F.,.F.,(4,2,4),(0.,0.000225062726248243,0.000450125452496486),
 .UNSPECIFIED.);
#180=B_SPLINE_CURVE_WITH_KNOTS('',3,(#45869,#45870,#45871,#45872,#45873,
#45874),.UNSPECIFIED.,.F.,.F.,(4,2,4),(0.,0.000154705575294623,0.000309411150589247),
 .UNSPECIFIED.);
#181=B_SPLINE_CURVE_WITH_KNOTS('',3,(#46087,#46088,#46089,#46090,#46091,
#46092),.UNSPECIFIED.,.F.,.F.,(4,2,4),(0.,0.000172936470548356,0.000345872941096713),
 .UNSPECIFIED.);
#182=B_SPLINE_CURVE_WITH_KNOTS('',3,(#46096,#46097,#46098,#46099,#46100,
#46101),.UNSPECIFIED.,.F.,.F.,(4,2,4),(0.,0.000207571827648373,0.000415143655296747),
 .UNSPECIFIED.);
#183=B_SPLINE_CURVE_WITH_KNOTS('',3,(#46113,#46114,#46115,#46116,#46117,
#46118,#46119,#46120,#46121,#46122),.UNSPECIFIED.,.F.,.F.,(4,2,2,2,4),(0.,
0.00582165875416865,0.0116046152377829,0.0173793076659594,0.0232084247026305),
 .UNSPECIFIED.);
#184=B_SPLINE_CURVE_WITH_KNOTS('',3,(#46133,#46134,#46135,#46136,#46137,
#46138,#46139,#46140,#46141,#46142),.UNSPECIFIED.,.F.,.F.,(4,2,2,2,4),(0.,
0.000131545758044192,0.000263091516088384,0.000394637274132577,0.000526183032176769),
 .UNSPECIFIED.);
#185=B_SPLINE_CURVE_WITH_KNOTS('',3,(#46153,#46154,#46155,#46156,#46157,
#46158),.UNSPECIFIED.,.F.,.F.,(4,2,4),(0.,0.000154705575294623,0.000309411150589247),
 .UNSPECIFIED.);
#186=B_SPLINE_CURVE_WITH_KNOTS('',3,(#46169,#46170,#46171,#46172,#46173,
#46174),.UNSPECIFIED.,.F.,.F.,(4,2,4),(0.,0.000225062726248243,0.000450125452496486),
 .UNSPECIFIED.);
#187=B_SPLINE_CURVE_WITH_KNOTS('',3,(#46395,#46396,#46397,#46398,#46399,
#46400),.UNSPECIFIED.,.F.,.F.,(4,2,4),(0.,0.000207571827648373,0.000415143655296747),
 .UNSPECIFIED.);
#188=B_SPLINE_CURVE_WITH_KNOTS('',3,(#46403,#46404,#46405,#46406,#46407,
#46408),.UNSPECIFIED.,.F.,.F.,(4,2,4),(0.,0.000172936470548356,0.000345872941096713),
 .UNSPECIFIED.);
#189=B_SPLINE_CURVE_WITH_KNOTS('',3,(#46515,#46516,#46517,#46518,#46519,
#46520),.UNSPECIFIED.,.F.,.F.,(4,2,4),(0.,0.000190134978024329,0.000380269956048659),
 .UNSPECIFIED.);
#190=B_SPLINE_CURVE_WITH_KNOTS('',3,(#46524,#46525,#46526,#46527,#46528,
#46529),.UNSPECIFIED.,.F.,.F.,(4,2,4),(0.,0.000190134978024329,0.000380269956048659),
 .UNSPECIFIED.);
#191=B_SPLINE_CURVE_WITH_KNOTS('',3,(#46535,#46536,#46537,#46538,#46539,
#46540,#46541,#46542,#46543,#46544),.UNSPECIFIED.,.F.,.F.,(4,2,2,2,4),(0.,
0.000131545758044205,0.000263091516088411,0.000394637274132616,0.000526183032176821),
 .UNSPECIFIED.);
#192=B_SPLINE_CURVE_WITH_KNOTS('',3,(#46555,#46556,#46557,#46558,#46559,
#46560,#46561,#46562,#46563,#46564),.UNSPECIFIED.,.F.,.F.,(4,2,2,2,4),(0.,
0.00582165875416507,0.0116046152377718,0.0173793076659468,0.0232084247026225),
 .UNSPECIFIED.);
#193=B_SPLINE_CURVE_WITH_KNOTS('',3,(#46575,#46576,#46577,#46578,#46579,
#46580),.UNSPECIFIED.,.F.,.F.,(4,2,4),(0.,0.000225062726248245,0.00045012545249649),
 .UNSPECIFIED.);
#194=B_SPLINE_CURVE_WITH_KNOTS('',3,(#46591,#46592,#46593,#46594,#46595,
#46596),.UNSPECIFIED.,.F.,.F.,(4,2,4),(0.,0.000154705575294623,0.000309411150589245),
 .UNSPECIFIED.);
#195=B_SPLINE_CURVE_WITH_KNOTS('',3,(#46809,#46810,#46811,#46812,#46813,
#46814),.UNSPECIFIED.,.F.,.F.,(4,2,4),(0.,0.000172936470548359,0.000345872941096718),
 .UNSPECIFIED.);
#196=B_SPLINE_CURVE_WITH_KNOTS('',3,(#46818,#46819,#46820,#46821,#46822,
#46823),.UNSPECIFIED.,.F.,.F.,(4,2,4),(0.,0.00020757182764838,0.000415143655296759),
 .UNSPECIFIED.);
#197=B_SPLINE_CURVE_WITH_KNOTS('',3,(#46835,#46836,#46837,#46838,#46839,
#46840,#46841,#46842,#46843,#46844),.UNSPECIFIED.,.F.,.F.,(4,2,2,2,4),(0.,
0.00582165875416724,0.0116046152377813,0.0173793076659622,0.0232084247026362),
 .UNSPECIFIED.);
#198=B_SPLINE_CURVE_WITH_KNOTS('',3,(#46855,#46856,#46857,#46858,#46859,
#46860,#46861,#46862,#46863,#46864),.UNSPECIFIED.,.F.,.F.,(4,2,2,2,4),(0.,
0.000131545758044193,0.000263091516088385,0.000394637274132578,0.00052618303217677),
 .UNSPECIFIED.);
#199=B_SPLINE_CURVE_WITH_KNOTS('',3,(#46875,#46876,#46877,#46878,#46879,
#46880),.UNSPECIFIED.,.F.,.F.,(4,2,4),(0.,0.000154705575294619,0.000309411150589238),
 .UNSPECIFIED.);
#200=B_SPLINE_CURVE_WITH_KNOTS('',3,(#46891,#46892,#46893,#46894,#46895,
#46896),.UNSPECIFIED.,.F.,.F.,(4,2,4),(0.,0.000225062726248254,0.000450125452496509),
 .UNSPECIFIED.);
#201=B_SPLINE_CURVE_WITH_KNOTS('',3,(#47117,#47118,#47119,#47120,#47121,
#47122),.UNSPECIFIED.,.F.,.F.,(4,2,4),(0.,0.000207571827648382,0.000415143655296765),
 .UNSPECIFIED.);
#202=B_SPLINE_CURVE_WITH_KNOTS('',3,(#47125,#47126,#47127,#47128,#47129,
#47130),.UNSPECIFIED.,.F.,.F.,(4,2,4),(0.,0.000172936470548364,0.000345872941096728),
 .UNSPECIFIED.);
#203=B_SPLINE_CURVE_WITH_KNOTS('',3,(#47722,#47723,#47724,#47725,#47726,
#47727,#47728,#47729,#47730,#47731,#47732,#47733,#47734,#47735,#47736,#47737,
#47738,#47739,#47740,#47741,#47742,#47743,#47744,#47745,#47746,#47747,#47748,
#47749,#47750,#47751,#47752,#47753,#47754,#47755,#47756,#47757,#47758,#47759,
#47760,#47761,#47762,#47763,#47764,#47765),.UNSPECIFIED.,.F.,.F.,(4,2,2,
2,2,2,2,2,2,2,2,2,2,2,2,2,2,2,2,2,2,4),(1.03042657715857,1.05132214270209,
1.100750513701,1.12546469920046,1.13782179195019,1.15017888469991,1.15394123238651,
1.15582240622981,1.15770358007311,1.15853272625536,1.15870657574837,1.15888042524139,
1.1590542747344,1.15922812422741,1.16005727040969,1.16193844425299,1.16381961809628,
1.16758196578287,1.1799390585326,1.19229615128232,1.21701033678178,1.25539600392629),
 .UNSPECIFIED.);
#204=B_SPLINE_CURVE_WITH_KNOTS('',3,(#47957,#47958,#47959,#47960),
 .UNSPECIFIED.,.F.,.F.,(4,4),(0.,1.),.UNSPECIFIED.);
#205=B_SPLINE_CURVE_WITH_KNOTS('',3,(#48219,#48220,#48221,#48222,#48223,
#48224,#48225,#48226,#48227,#48228,#48229,#48230,#48231,#48232,#48233,#48234,
#48235,#48236,#48237,#48238,#48239,#48240,#48241,#48242,#48243,#48244,#48245,
#48246,#48247,#48248,#48249,#48250,#48251,#48252,#48253,#48254,#48255,#48256,
#48257,#48258,#48259,#48260,#48261,#48262),.UNSPECIFIED.,.F.,.F.,(4,2,2,
2,2,2,2,2,2,2,2,2,2,2,2,2,2,2,2,2,2,4),(-1.28733427332421,-1.2664387077807,
-1.21701033678179,-1.19229615128233,-1.1799390585326,-1.16758196578287,
-1.16381961809627,-1.16193844425297,-1.16005727040967,-1.15922812422743,
-1.15905427473441,-1.15888042524139,-1.15870657574838,-1.15853272625537,
-1.15770358007309,-1.1558224062298,-1.1539412323865,-1.15017888469992,-1.13782179195019,
-1.12546469920046,-1.10075051370101,-1.0623648465565),.UNSPECIFIED.);
#206=B_SPLINE_CURVE_WITH_KNOTS('',3,(#48728,#48729,#48730,#48731,#48732,
#48733,#48734,#48735,#48736,#48737,#48738,#48739,#48740,#48741,#48742,#48743,
#48744,#48745,#48746,#48747,#48748,#48749,#48750,#48751,#48752,#48753,#48754,
#48755,#48756,#48757,#48758,#48759,#48760,#48761,#48762,#48763,#48764,#48765,
#48766,#48767,#48768,#48769,#48770,#48771),.UNSPECIFIED.,.F.,.F.,(4,2,2,
2,2,2,2,2,2,2,2,2,2,2,2,2,2,2,2,2,2,4),(1.03042657715857,1.05132214270208,
1.10075051370097,1.12546469920041,1.13782179195014,1.15017888469986,1.15394123238646,
1.15582240622976,1.15770358007306,1.15853272625537,1.15870657574839,1.1588804252414,
1.15905427473441,1.15922812422743,1.16005727040974,1.16193844425304,1.16381961809634,
1.16758196578294,1.17993905853267,1.19229615128239,1.21701033678185,1.25539600392631),
 .UNSPECIFIED.);
#207=B_SPLINE_CURVE_WITH_KNOTS('',3,(#48948,#48949,#48950,#48951),
 .UNSPECIFIED.,.F.,.F.,(4,4),(0.,1.),.UNSPECIFIED.);
#208=B_SPLINE_CURVE_WITH_KNOTS('',3,(#49210,#49211,#49212,#49213,#49214,
#49215,#49216,#49217,#49218,#49219,#49220,#49221,#49222,#49223,#49224,#49225,
#49226,#49227,#49228,#49229,#49230,#49231,#49232,#49233,#49234,#49235,#49236,
#49237,#49238,#49239,#49240,#49241,#49242,#49243,#49244,#49245,#49246,#49247,
#49248,#49249,#49250,#49251,#49252,#49253),.UNSPECIFIED.,.F.,.F.,(4,2,2,
2,2,2,2,2,2,2,2,2,2,2,2,2,2,2,2,2,2,4),(-1.28733427332428,-1.26643870778077,
-1.21701033678185,-1.19229615128239,-1.17993905853267,-1.16758196578294,
-1.16381961809634,-1.16193844425303,-1.16005727040973,-1.15922812422746,
-1.15905427473445,-1.15888042524143,-1.15870657574842,-1.1585327262554,
-1.15770358007311,-1.15582240622981,-1.15394123238652,-1.15017888469992,
-1.13782179195019,-1.12546469920047,-1.10075051370101,-1.0623648465565),
 .UNSPECIFIED.);
#209=B_SPLINE_CURVE_WITH_KNOTS('',3,(#49719,#49720,#49721,#49722,#49723,
#49724,#49725,#49726,#49727,#49728,#49729,#49730,#49731,#49732,#49733,#49734,
#49735,#49736,#49737,#49738,#49739,#49740,#49741,#49742,#49743,#49744,#49745,
#49746,#49747,#49748,#49749,#49750,#49751,#49752,#49753,#49754,#49755,#49756,
#49757,#49758,#49759,#49760,#49761,#49762),.UNSPECIFIED.,.F.,.F.,(4,2,2,
2,2,2,2,2,2,2,2,2,2,2,2,2,2,2,2,2,2,4),(1.03042657715857,1.05132214270209,
1.100750513701,1.12546469920046,1.13782179195019,1.15017888469991,1.15394123238651,
1.15582240622981,1.15770358007311,1.15853272625536,1.15870657574837,1.15888042524139,
1.1590542747344,1.15922812422741,1.16005727040969,1.16193844425299,1.16381961809628,
1.16758196578287,1.1799390585326,1.19229615128232,1.21701033678178,1.25539600392629),
 .UNSPECIFIED.);
#210=B_SPLINE_CURVE_WITH_KNOTS('',3,(#49939,#49940,#49941,#49942),
 .UNSPECIFIED.,.F.,.F.,(4,4),(0.,1.),.UNSPECIFIED.);
#211=B_SPLINE_CURVE_WITH_KNOTS('',3,(#50201,#50202,#50203,#50204,#50205,
#50206,#50207,#50208,#50209,#50210,#50211,#50212,#50213,#50214,#50215,#50216,
#50217,#50218,#50219,#50220,#50221,#50222,#50223,#50224,#50225,#50226,#50227,
#50228,#50229,#50230,#50231,#50232,#50233,#50234,#50235,#50236,#50237,#50238,
#50239,#50240,#50241,#50242,#50243,#50244),.UNSPECIFIED.,.F.,.F.,(4,2,2,
2,2,2,2,2,2,2,2,2,2,2,2,2,2,2,2,2,2,4),(-1.28733427332421,-1.2664387077807,
-1.21701033678179,-1.19229615128233,-1.1799390585326,-1.16758196578287,
-1.16381961809627,-1.16193844425297,-1.16005727040967,-1.15922812422743,
-1.15905427473441,-1.15888042524139,-1.15870657574838,-1.15853272625537,
-1.15770358007309,-1.1558224062298,-1.1539412323865,-1.15017888469992,-1.13782179195019,
-1.12546469920046,-1.10075051370101,-1.0623648465565),.UNSPECIFIED.);
#212=B_SPLINE_CURVE_WITH_KNOTS('',3,(#50709,#50710,#50711,#50712,#50713,
#50714,#50715,#50716,#50717,#50718,#50719,#50720,#50721,#50722,#50723,#50724,
#50725,#50726,#50727,#50728,#50729,#50730,#50731,#50732,#50733,#50734,#50735,
#50736,#50737,#50738,#50739,#50740,#50741,#50742,#50743,#50744,#50745,#50746,
#50747,#50748,#50749,#50750,#50751,#50752),.UNSPECIFIED.,.F.,.F.,(4,2,2,
2,2,2,2,2,2,2,2,2,2,2,2,2,2,2,2,2,2,4),(1.03042657715857,1.05132214270209,
1.100750513701,1.12546469920046,1.13782179195018,1.15017888469991,1.15394123238651,
1.15582240622981,1.15770358007311,1.15853272625539,1.1587065757484,1.15888042524142,
1.15905427473444,1.15922812422747,1.16005727040972,1.16193844425301,1.16381961809631,
1.16758196578291,1.17993905853263,1.19229615128236,1.21701033678181,1.25539600392633),
 .UNSPECIFIED.);
#213=B_SPLINE_CURVE_WITH_KNOTS('',3,(#50927,#50928,#50929,#50930),
 .UNSPECIFIED.,.F.,.F.,(4,4),(0.,1.),.UNSPECIFIED.);
#214=B_SPLINE_CURVE_WITH_KNOTS('',3,(#51171,#51172,#51173,#51174,#51175,
#51176,#51177,#51178,#51179,#51180,#51181,#51182,#51183,#51184,#51185,#51186,
#51187,#51188,#51189,#51190,#51191,#51192,#51193,#51194,#51195,#51196,#51197,
#51198,#51199,#51200,#51201,#51202,#51203,#51204,#51205,#51206,#51207,#51208,
#51209,#51210,#51211,#51212,#51213,#51214),.UNSPECIFIED.,.F.,.F.,(4,2,2,
2,2,2,2,2,2,2,2,2,2,2,2,2,2,2,2,2,2,4),(-1.28733427332424,-1.26643870778073,
-1.21701033678182,-1.19229615128236,-1.17993905853263,-1.16758196578291,
-1.16381961809633,-1.16193844425304,-1.16005727040975,-1.15922812422744,
-1.15905427473442,-1.15888042524141,-1.15870657574838,-1.15853272625536,
-1.15770358007311,-1.15582240622981,-1.15394123238652,-1.15017888469992,
-1.13782179195019,-1.12546469920047,-1.10075051370101,-1.0623648465565),
 .UNSPECIFIED.);
#215=FACE_BOUND('',#9068,.T.);
#216=FACE_BOUND('',#9069,.T.);
#217=FACE_BOUND('',#9070,.T.);
#218=FACE_BOUND('',#9071,.T.);
#219=FACE_BOUND('',#9072,.T.);
#220=FACE_BOUND('',#9073,.T.);
#221=FACE_BOUND('',#9074,.T.);
#222=FACE_BOUND('',#9075,.T.);
#223=FACE_BOUND('',#9076,.T.);
#224=FACE_BOUND('',#9077,.T.);
#225=FACE_BOUND('',#9078,.T.);
#226=FACE_BOUND('',#9079,.T.);
#227=FACE_BOUND('',#9080,.T.);
#228=FACE_BOUND('',#9081,.T.);
#229=FACE_BOUND('',#9082,.T.);
#230=FACE_BOUND('',#9083,.T.);
#231=FACE_BOUND('',#9084,.T.);
#232=FACE_BOUND('',#9085,.T.);
#233=FACE_BOUND('',#9086,.T.);
#234=FACE_BOUND('',#9087,.T.);
#235=FACE_BOUND('',#9088,.T.);
#236=FACE_BOUND('',#9089,.T.);
#237=FACE_BOUND('',#9090,.T.);
#238=FACE_BOUND('',#9091,.T.);
#239=FACE_BOUND('',#9092,.T.);
#240=FACE_BOUND('',#9093,.T.);
#241=FACE_BOUND('',#9094,.T.);
#242=FACE_BOUND('',#9095,.T.);
#243=FACE_BOUND('',#9096,.T.);
#244=FACE_BOUND('',#9097,.T.);
#245=FACE_BOUND('',#9098,.T.);
#246=FACE_BOUND('',#9099,.T.);
#247=FACE_BOUND('',#9100,.T.);
#248=FACE_BOUND('',#9101,.T.);
#249=FACE_BOUND('',#9102,.T.);
#250=FACE_BOUND('',#9103,.T.);
#251=FACE_BOUND('',#9104,.T.);
#252=FACE_BOUND('',#9105,.T.);
#253=FACE_BOUND('',#9106,.T.);
#254=FACE_BOUND('',#9107,.T.);
#255=FACE_BOUND('',#9108,.T.);
#256=FACE_BOUND('',#9109,.T.);
#257=FACE_BOUND('',#9110,.T.);
#258=FACE_BOUND('',#9111,.T.);
#259=FACE_BOUND('',#9112,.T.);
#260=FACE_BOUND('',#9113,.T.);
#261=FACE_BOUND('',#9114,.T.);
#262=FACE_BOUND('',#9115,.T.);
#263=FACE_BOUND('',#9116,.T.);
#264=FACE_BOUND('',#9117,.T.);
#265=FACE_BOUND('',#9118,.T.);
#266=FACE_BOUND('',#9119,.T.);
#267=FACE_BOUND('',#9120,.T.);
#268=FACE_BOUND('',#9121,.T.);
#269=FACE_BOUND('',#9122,.T.);
#270=FACE_BOUND('',#9123,.T.);
#271=FACE_BOUND('',#9124,.T.);
#272=FACE_BOUND('',#9125,.T.);
#273=FACE_BOUND('',#9126,.T.);
#274=FACE_BOUND('',#9127,.T.);
#275=FACE_BOUND('',#9128,.T.);
#276=FACE_BOUND('',#9129,.T.);
#277=FACE_BOUND('',#9130,.T.);
#278=FACE_BOUND('',#9131,.T.);
#279=FACE_BOUND('',#9132,.T.);
#280=FACE_BOUND('',#9133,.T.);
#281=FACE_BOUND('',#9134,.T.);
#282=FACE_BOUND('',#9135,.T.);
#283=FACE_BOUND('',#9136,.T.);
#284=FACE_BOUND('',#9137,.T.);
#285=FACE_BOUND('',#9138,.T.);
#286=FACE_BOUND('',#9139,.T.);
#287=FACE_BOUND('',#9140,.T.);
#288=FACE_BOUND('',#9141,.T.);
#289=FACE_BOUND('',#9142,.T.);
#290=FACE_BOUND('',#9143,.T.);
#291=FACE_BOUND('',#9144,.T.);
#292=FACE_BOUND('',#9145,.T.);
#293=FACE_BOUND('',#9146,.T.);
#294=FACE_BOUND('',#9147,.T.);
#295=FACE_BOUND('',#9148,.T.);
#296=FACE_BOUND('',#9149,.T.);
#297=FACE_BOUND('',#9150,.T.);
#298=FACE_BOUND('',#9151,.T.);
#299=FACE_BOUND('',#9152,.T.);
#300=FACE_BOUND('',#9153,.T.);
#301=FACE_BOUND('',#9154,.T.);
#302=FACE_BOUND('',#9155,.T.);
#303=FACE_BOUND('',#9156,.T.);
#304=FACE_BOUND('',#9157,.T.);
#305=FACE_BOUND('',#9158,.T.);
#306=FACE_BOUND('',#9159,.T.);
#307=FACE_BOUND('',#9160,.T.);
#308=FACE_BOUND('',#9161,.T.);
#309=FACE_BOUND('',#9162,.T.);
#310=FACE_BOUND('',#9163,.T.);
#311=FACE_BOUND('',#9164,.T.);
#312=FACE_BOUND('',#9165,.T.);
#313=FACE_BOUND('',#9166,.T.);
#314=FACE_BOUND('',#9167,.T.);
#315=FACE_BOUND('',#9168,.T.);
#316=FACE_BOUND('',#9169,.T.);
#317=FACE_BOUND('',#9170,.T.);
#318=FACE_BOUND('',#9171,.T.);
#319=FACE_BOUND('',#9172,.T.);
#320=FACE_BOUND('',#9173,.T.);
#321=FACE_BOUND('',#9174,.T.);
#322=FACE_BOUND('',#9175,.T.);
#323=FACE_BOUND('',#9176,.T.);
#324=FACE_BOUND('',#9177,.T.);
#325=FACE_BOUND('',#9178,.T.);
#326=FACE_BOUND('',#9179,.T.);
#327=FACE_BOUND('',#9180,.T.);
#328=FACE_BOUND('',#9181,.T.);
#329=FACE_BOUND('',#9182,.T.);
#330=FACE_BOUND('',#9183,.T.);
#331=FACE_BOUND('',#9184,.T.);
#332=FACE_BOUND('',#9185,.T.);
#333=FACE_BOUND('',#9186,.T.);
#334=FACE_BOUND('',#9187,.T.);
#335=FACE_BOUND('',#9188,.T.);
#336=FACE_BOUND('',#9189,.T.);
#337=FACE_BOUND('',#9190,.T.);
#338=FACE_BOUND('',#9191,.T.);
#339=FACE_BOUND('',#9192,.T.);
#340=FACE_BOUND('',#9193,.T.);
#341=FACE_BOUND('',#9194,.T.);
#342=FACE_BOUND('',#9195,.T.);
#343=FACE_BOUND('',#9196,.T.);
#344=FACE_BOUND('',#9197,.T.);
#345=FACE_BOUND('',#9198,.T.);
#346=FACE_BOUND('',#9199,.T.);
#347=FACE_BOUND('',#9200,.T.);
#348=FACE_BOUND('',#9201,.T.);
#349=FACE_BOUND('',#9202,.T.);
#350=FACE_BOUND('',#9203,.T.);
#351=FACE_BOUND('',#9204,.T.);
#352=FACE_BOUND('',#9205,.T.);
#353=FACE_BOUND('',#9206,.T.);
#354=FACE_BOUND('',#9207,.T.);
#355=FACE_BOUND('',#9208,.T.);
#356=FACE_BOUND('',#9209,.T.);
#357=FACE_BOUND('',#9210,.T.);
#358=FACE_BOUND('',#9211,.T.);
#359=FACE_BOUND('',#9212,.T.);
#360=FACE_BOUND('',#9213,.T.);
#361=FACE_BOUND('',#9214,.T.);
#362=FACE_BOUND('',#9215,.T.);
#363=FACE_BOUND('',#9216,.T.);
#364=FACE_BOUND('',#9217,.T.);
#365=FACE_BOUND('',#9218,.T.);
#366=FACE_BOUND('',#9219,.T.);
#367=FACE_BOUND('',#9220,.T.);
#368=FACE_BOUND('',#9221,.T.);
#369=FACE_BOUND('',#9222,.T.);
#370=FACE_BOUND('',#9223,.T.);
#371=FACE_BOUND('',#9224,.T.);
#372=FACE_BOUND('',#9225,.T.);
#373=FACE_BOUND('',#9226,.T.);
#374=FACE_BOUND('',#9227,.T.);
#375=FACE_BOUND('',#9228,.T.);
#376=FACE_BOUND('',#9229,.T.);
#377=FACE_BOUND('',#9230,.T.);
#378=FACE_BOUND('',#9231,.T.);
#379=FACE_BOUND('',#9232,.T.);
#380=FACE_BOUND('',#9233,.T.);
#381=FACE_BOUND('',#9234,.T.);
#382=FACE_BOUND('',#9235,.T.);
#383=FACE_BOUND('',#9236,.T.);
#384=FACE_BOUND('',#9237,.T.);
#385=FACE_BOUND('',#9238,.T.);
#386=FACE_BOUND('',#9239,.T.);
#387=FACE_BOUND('',#9240,.T.);
#388=FACE_BOUND('',#9241,.T.);
#389=FACE_BOUND('',#9242,.T.);
#390=FACE_BOUND('',#9243,.T.);
#391=FACE_BOUND('',#9244,.T.);
#392=FACE_BOUND('',#9246,.T.);
#393=FACE_BOUND('',#9247,.T.);
#394=FACE_BOUND('',#9248,.T.);
#395=FACE_BOUND('',#9249,.T.);
#396=FACE_BOUND('',#9250,.T.);
#397=FACE_BOUND('',#9251,.T.);
#398=FACE_BOUND('',#9252,.T.);
#399=FACE_BOUND('',#9253,.T.);
#400=FACE_BOUND('',#9254,.T.);
#401=FACE_BOUND('',#9255,.T.);
#402=FACE_BOUND('',#9256,.T.);
#403=FACE_BOUND('',#9257,.T.);
#404=FACE_BOUND('',#9258,.T.);
#405=FACE_BOUND('',#9259,.T.);
#406=FACE_BOUND('',#9260,.T.);
#407=FACE_BOUND('',#9261,.T.);
#408=FACE_BOUND('',#9262,.T.);
#409=FACE_BOUND('',#9263,.T.);
#410=FACE_BOUND('',#9264,.T.);
#411=FACE_BOUND('',#9265,.T.);
#412=FACE_BOUND('',#9266,.T.);
#413=FACE_BOUND('',#9267,.T.);
#414=FACE_BOUND('',#9268,.T.);
#415=FACE_BOUND('',#9269,.T.);
#416=FACE_BOUND('',#9270,.T.);
#417=FACE_BOUND('',#9271,.T.);
#418=FACE_BOUND('',#9272,.T.);
#419=FACE_BOUND('',#9273,.T.);
#420=FACE_BOUND('',#9274,.T.);
#421=FACE_BOUND('',#9275,.T.);
#422=FACE_BOUND('',#9276,.T.);
#423=FACE_BOUND('',#9277,.T.);
#424=FACE_BOUND('',#9278,.T.);
#425=FACE_BOUND('',#9279,.T.);
#426=FACE_BOUND('',#9280,.T.);
#427=FACE_BOUND('',#9281,.T.);
#428=FACE_BOUND('',#9282,.T.);
#429=FACE_BOUND('',#9283,.T.);
#430=FACE_BOUND('',#9284,.T.);
#431=FACE_BOUND('',#9285,.T.);
#432=FACE_BOUND('',#9286,.T.);
#433=FACE_BOUND('',#9287,.T.);
#434=FACE_BOUND('',#9288,.T.);
#435=FACE_BOUND('',#9289,.T.);
#436=FACE_BOUND('',#9290,.T.);
#437=FACE_BOUND('',#9291,.T.);
#438=FACE_BOUND('',#9292,.T.);
#439=FACE_BOUND('',#9293,.T.);
#440=FACE_BOUND('',#9294,.T.);
#441=FACE_BOUND('',#9295,.T.);
#442=FACE_BOUND('',#9296,.T.);
#443=FACE_BOUND('',#9297,.T.);
#444=FACE_BOUND('',#9298,.T.);
#445=FACE_BOUND('',#9299,.T.);
#446=FACE_BOUND('',#9300,.T.);
#447=FACE_BOUND('',#9301,.T.);
#448=FACE_BOUND('',#9302,.T.);
#449=FACE_BOUND('',#9303,.T.);
#450=FACE_BOUND('',#9304,.T.);
#451=FACE_BOUND('',#9305,.T.);
#452=FACE_BOUND('',#9306,.T.);
#453=FACE_BOUND('',#9307,.T.);
#454=FACE_BOUND('',#9308,.T.);
#455=FACE_BOUND('',#9309,.T.);
#456=FACE_BOUND('',#9310,.T.);
#457=FACE_BOUND('',#9311,.T.);
#458=FACE_BOUND('',#9312,.T.);
#459=FACE_BOUND('',#9313,.T.);
#460=FACE_BOUND('',#9314,.T.);
#461=FACE_BOUND('',#9315,.T.);
#462=FACE_BOUND('',#9316,.T.);
#463=FACE_BOUND('',#9317,.T.);
#464=FACE_BOUND('',#9318,.T.);
#465=FACE_BOUND('',#9319,.T.);
#466=FACE_BOUND('',#9320,.T.);
#467=FACE_BOUND('',#9321,.T.);
#468=FACE_BOUND('',#9322,.T.);
#469=FACE_BOUND('',#9323,.T.);
#470=FACE_BOUND('',#9324,.T.);
#471=FACE_BOUND('',#9325,.T.);
#472=FACE_BOUND('',#9326,.T.);
#473=FACE_BOUND('',#9327,.T.);
#474=FACE_BOUND('',#9328,.T.);
#475=FACE_BOUND('',#9329,.T.);
#476=FACE_BOUND('',#9330,.T.);
#477=FACE_BOUND('',#9331,.T.);
#478=FACE_BOUND('',#9332,.T.);
#479=FACE_BOUND('',#9333,.T.);
#480=FACE_BOUND('',#9334,.T.);
#481=FACE_BOUND('',#9335,.T.);
#482=FACE_BOUND('',#9336,.T.);
#483=FACE_BOUND('',#9337,.T.);
#484=FACE_BOUND('',#9338,.T.);
#485=FACE_BOUND('',#9339,.T.);
#486=FACE_BOUND('',#9340,.T.);
#487=FACE_BOUND('',#9341,.T.);
#488=FACE_BOUND('',#9342,.T.);
#489=FACE_BOUND('',#9343,.T.);
#490=FACE_BOUND('',#9344,.T.);
#491=FACE_BOUND('',#9345,.T.);
#492=FACE_BOUND('',#9346,.T.);
#493=FACE_BOUND('',#9347,.T.);
#494=FACE_BOUND('',#9348,.T.);
#495=FACE_BOUND('',#9349,.T.);
#496=FACE_BOUND('',#9350,.T.);
#497=FACE_BOUND('',#9351,.T.);
#498=FACE_BOUND('',#9352,.T.);
#499=FACE_BOUND('',#9353,.T.);
#500=FACE_BOUND('',#9354,.T.);
#501=FACE_BOUND('',#9355,.T.);
#502=FACE_BOUND('',#9356,.T.);
#503=FACE_BOUND('',#9357,.T.);
#504=FACE_BOUND('',#9358,.T.);
#505=FACE_BOUND('',#9359,.T.);
#506=FACE_BOUND('',#9360,.T.);
#507=FACE_BOUND('',#9361,.T.);
#508=FACE_BOUND('',#9362,.T.);
#509=FACE_BOUND('',#9363,.T.);
#510=FACE_BOUND('',#9364,.T.);
#511=FACE_BOUND('',#9365,.T.);
#512=FACE_BOUND('',#9366,.T.);
#513=FACE_BOUND('',#9367,.T.);
#514=FACE_BOUND('',#9368,.T.);
#515=FACE_BOUND('',#9369,.T.);
#516=FACE_BOUND('',#9370,.T.);
#517=FACE_BOUND('',#9371,.T.);
#518=FACE_BOUND('',#9372,.T.);
#519=FACE_BOUND('',#9373,.T.);
#520=FACE_BOUND('',#9374,.T.);
#521=FACE_BOUND('',#9375,.T.);
#522=FACE_BOUND('',#9376,.T.);
#523=FACE_BOUND('',#9377,.T.);
#524=FACE_BOUND('',#9378,.T.);
#525=FACE_BOUND('',#9379,.T.);
#526=FACE_BOUND('',#9380,.T.);
#527=FACE_BOUND('',#9381,.T.);
#528=FACE_BOUND('',#9382,.T.);
#529=FACE_BOUND('',#9383,.T.);
#530=FACE_BOUND('',#9384,.T.);
#531=FACE_BOUND('',#9385,.T.);
#532=FACE_BOUND('',#9386,.T.);
#533=FACE_BOUND('',#9387,.T.);
#534=FACE_BOUND('',#9388,.T.);
#535=FACE_BOUND('',#9389,.T.);
#536=FACE_BOUND('',#9390,.T.);
#537=FACE_BOUND('',#9391,.T.);
#538=FACE_BOUND('',#9392,.T.);
#539=FACE_BOUND('',#9393,.T.);
#540=FACE_BOUND('',#9394,.T.);
#541=FACE_BOUND('',#9395,.T.);
#542=FACE_BOUND('',#9396,.T.);
#543=FACE_BOUND('',#9397,.T.);
#544=FACE_BOUND('',#9398,.T.);
#545=FACE_BOUND('',#9399,.T.);
#546=FACE_BOUND('',#9400,.T.);
#547=FACE_BOUND('',#9401,.T.);
#548=FACE_BOUND('',#9402,.T.);
#549=FACE_BOUND('',#9403,.T.);
#550=FACE_BOUND('',#9404,.T.);
#551=FACE_BOUND('',#9405,.T.);
#552=FACE_BOUND('',#9406,.T.);
#553=FACE_BOUND('',#9407,.T.);
#554=FACE_BOUND('',#9408,.T.);
#555=FACE_BOUND('',#9409,.T.);
#556=FACE_BOUND('',#9410,.T.);
#557=FACE_BOUND('',#9411,.T.);
#558=FACE_BOUND('',#9412,.T.);
#559=FACE_BOUND('',#9413,.T.);
#560=FACE_BOUND('',#9414,.T.);
#561=FACE_BOUND('',#9415,.T.);
#562=FACE_BOUND('',#9416,.T.);
#563=FACE_BOUND('',#9417,.T.);
#564=FACE_BOUND('',#9418,.T.);
#565=FACE_BOUND('',#9419,.T.);
#566=FACE_BOUND('',#9420,.T.);
#567=FACE_BOUND('',#9421,.T.);
#568=FACE_BOUND('',#9422,.T.);
#569=FACE_BOUND('',#9423,.T.);
#570=FACE_BOUND('',#9424,.T.);
#571=FACE_BOUND('',#9425,.T.);
#572=FACE_BOUND('',#9426,.T.);
#573=FACE_BOUND('',#9427,.T.);
#574=FACE_BOUND('',#9428,.T.);
#575=FACE_BOUND('',#9429,.T.);
#576=FACE_BOUND('',#9430,.T.);
#577=FACE_BOUND('',#9618,.T.);
#578=FACE_BOUND('',#9620,.T.);
#579=FACE_BOUND('',#9622,.T.);
#580=ELLIPSE('',#29678,0.212909815672888,0.199024236070394);
#581=ELLIPSE('',#29682,0.212909815670807,0.199024236066366);
#582=ELLIPSE('',#29685,0.212909815669945,0.199024236064699);
#583=ELLIPSE('',#29687,0.212909815670807,0.199024236066366);
#584=ELLIPSE('',#29876,0.212909815670807,0.199024236066366);
#585=ELLIPSE('',#29878,0.212909815672255,0.199024236069217);
#586=ELLIPSE('',#30047,0.212909815670773,0.199024236066302);
#587=ELLIPSE('',#30049,0.212909815670807,0.199024236066366);
#588=ELLIPSE('',#30537,0.235956562712376,0.220582441455717);
#589=ELLIPSE('',#30539,0.235956562717693,0.220582441466044);
#590=ELLIPSE('',#30712,0.235956562717693,0.220582441466044);
#591=ELLIPSE('',#30714,0.235956562713908,0.220582441458674);
#592=ELLIPSE('',#31019,0.235956562712306,0.220582441455506);
#593=ELLIPSE('',#31023,0.235956562717693,0.220582441466044);
#594=ELLIPSE('',#31024,0.235956562712872,0.220582441456658);
#595=ELLIPSE('',#31026,0.235956562717693,0.220582441466044);
#596=PLANE('',#29676);
#597=PLANE('',#30365);
#598=PLANE('',#31071);
#599=PLANE('',#31072);
#600=PLANE('',#31073);
#601=PLANE('',#31076);
#602=PLANE('',#31077);
#603=PLANE('',#31079);
#604=PLANE('',#31080);
#605=PLANE('',#31081);
#606=PLANE('',#31084);
#607=PLANE('',#31085);
#608=PLANE('',#31086);
#609=PLANE('',#31089);
#610=PLANE('',#31090);
#611=PLANE('',#31091);
#612=PLANE('',#31094);
#613=PLANE('',#31095);
#614=PLANE('',#31096);
#615=PLANE('',#31099);
#616=PLANE('',#31100);
#617=PLANE('',#31101);
#618=PLANE('',#31104);
#619=PLANE('',#31106);
#620=PLANE('',#31108);
#621=PLANE('',#31111);
#622=PLANE('',#31113);
#623=PLANE('',#31115);
#624=PLANE('',#31117);
#625=PLANE('',#31119);
#626=PLANE('',#31121);
#627=PLANE('',#31123);
#628=PLANE('',#31125);
#629=PLANE('',#31126);
#630=PLANE('',#31128);
#631=PLANE('',#31130);
#632=PLANE('',#31132);
#633=PLANE('',#31134);
#634=PLANE('',#31136);
#635=PLANE('',#31138);
#636=PLANE('',#31140);
#637=PLANE('',#31142);
#638=PLANE('',#31144);
#639=PLANE('',#31146);
#640=PLANE('',#31148);
#641=PLANE('',#31150);
#642=PLANE('',#31152);
#643=PLANE('',#31154);
#644=PLANE('',#31156);
#645=PLANE('',#31158);
#646=PLANE('',#31161);
#647=PLANE('',#31163);
#648=PLANE('',#31165);
#649=PLANE('',#31167);
#650=PLANE('',#31169);
#651=PLANE('',#31171);
#652=PLANE('',#31173);
#653=PLANE('',#31175);
#654=PLANE('',#31176);
#655=PLANE('',#31178);
#656=PLANE('',#31180);
#657=PLANE('',#31182);
#658=PLANE('',#31184);
#659=PLANE('',#31186);
#660=PLANE('',#31188);
#661=PLANE('',#31190);
#662=PLANE('',#31192);
#663=PLANE('',#31194);
#664=PLANE('',#31196);
#665=PLANE('',#31198);
#666=PLANE('',#31200);
#667=PLANE('',#31203);
#668=PLANE('',#31205);
#669=PLANE('',#31207);
#670=PLANE('',#31209);
#671=PLANE('',#31211);
#672=PLANE('',#31213);
#673=PLANE('',#31215);
#674=PLANE('',#31217);
#675=PLANE('',#31219);
#676=PLANE('',#31221);
#677=PLANE('',#31223);
#678=PLANE('',#31225);
#679=PLANE('',#31227);
#680=PLANE('',#31229);
#681=PLANE('',#31231);
#682=PLANE('',#31233);
#683=PLANE('',#31235);
#684=PLANE('',#31236);
#685=PLANE('',#31238);
#686=PLANE('',#31240);
#687=PLANE('',#31242);
#688=PLANE('',#31244);
#689=PLANE('',#31246);
#690=PLANE('',#31248);
#691=PLANE('',#31256);
#692=PLANE('',#31257);
#693=PLANE('',#31258);
#694=PLANE('',#31262);
#695=PLANE('',#31264);
#696=PLANE('',#31267);
#697=PLANE('',#31270);
#698=PLANE('',#31273);
#699=PLANE('',#31276);
#700=PLANE('',#31279);
#701=PLANE('',#31281);
#702=PLANE('',#31283);
#703=PLANE('',#31286);
#704=PLANE('',#31288);
#705=PLANE('',#31290);
#706=PLANE('',#31292);
#707=PLANE('',#31294);
#708=PLANE('',#31296);
#709=PLANE('',#31298);
#710=PLANE('',#31300);
#711=PLANE('',#31301);
#712=PLANE('',#31303);
#713=PLANE('',#31305);
#714=PLANE('',#31307);
#715=PLANE('',#31309);
#716=PLANE('',#31311);
#717=PLANE('',#31313);
#718=PLANE('',#31315);
#719=PLANE('',#31317);
#720=PLANE('',#31319);
#721=PLANE('',#31321);
#722=PLANE('',#31323);
#723=PLANE('',#31325);
#724=PLANE('',#31327);
#725=PLANE('',#31329);
#726=PLANE('',#31331);
#727=PLANE('',#31333);
#728=PLANE('',#31336);
#729=PLANE('',#31338);
#730=PLANE('',#31340);
#731=PLANE('',#31342);
#732=PLANE('',#31344);
#733=PLANE('',#31346);
#734=PLANE('',#31348);
#735=PLANE('',#31350);
#736=PLANE('',#31351);
#737=PLANE('',#31353);
#738=PLANE('',#31355);
#739=PLANE('',#31357);
#740=PLANE('',#31359);
#741=PLANE('',#31361);
#742=PLANE('',#31363);
#743=PLANE('',#31365);
#744=PLANE('',#31367);
#745=PLANE('',#31369);
#746=PLANE('',#31371);
#747=PLANE('',#31373);
#748=PLANE('',#31375);
#749=PLANE('',#31378);
#750=PLANE('',#31380);
#751=PLANE('',#31382);
#752=PLANE('',#31384);
#753=PLANE('',#31386);
#754=PLANE('',#31388);
#755=PLANE('',#31390);
#756=PLANE('',#31392);
#757=PLANE('',#31394);
#758=PLANE('',#31396);
#759=PLANE('',#31398);
#760=PLANE('',#31400);
#761=PLANE('',#31402);
#762=PLANE('',#31404);
#763=PLANE('',#31406);
#764=PLANE('',#31408);
#765=PLANE('',#31410);
#766=PLANE('',#31411);
#767=PLANE('',#31413);
#768=PLANE('',#31415);
#769=PLANE('',#31417);
#770=PLANE('',#31419);
#771=PLANE('',#31421);
#772=PLANE('',#31423);
#773=PLANE('',#31430);
#774=PLANE('',#31431);
#775=PLANE('',#31432);
#776=PLANE('',#31435);
#777=PLANE('',#31436);
#778=PLANE('',#31438);
#779=PLANE('',#31439);
#780=PLANE('',#31440);
#781=PLANE('',#31443);
#782=PLANE('',#31444);
#783=PLANE('',#31445);
#784=PLANE('',#31448);
#785=PLANE('',#31449);
#786=PLANE('',#31450);
#787=PLANE('',#31453);
#788=PLANE('',#31454);
#789=PLANE('',#31455);
#790=PLANE('',#31458);
#791=PLANE('',#31459);
#792=PLANE('',#31460);
#793=PLANE('',#31463);
#794=PLANE('',#31464);
#795=PLANE('',#31466);
#796=PLANE('',#31468);
#797=PLANE('',#31470);
#798=PLANE('',#31472);
#799=PLANE('',#31474);
#800=PLANE('',#31476);
#801=PLANE('',#31478);
#802=PLANE('',#31480);
#803=PLANE('',#31482);
#804=PLANE('',#31483);
#805=PLANE('',#31485);
#806=PLANE('',#31487);
#807=PLANE('',#31489);
#808=PLANE('',#31491);
#809=PLANE('',#31493);
#810=PLANE('',#31495);
#811=PLANE('',#31497);
#812=PLANE('',#31499);
#813=PLANE('',#31501);
#814=PLANE('',#31503);
#815=PLANE('',#31505);
#816=PLANE('',#31507);
#817=PLANE('',#31509);
#818=PLANE('',#31511);
#819=PLANE('',#31512);
#820=PLANE('',#31514);
#821=PLANE('',#31516);
#822=PLANE('',#31518);
#823=PLANE('',#31520);
#824=PLANE('',#31522);
#825=PLANE('',#31524);
#826=PLANE('',#31526);
#827=PLANE('',#31528);
#828=PLANE('',#31530);
#829=PLANE('',#31531);
#830=PLANE('',#31533);
#831=PLANE('',#31535);
#832=PLANE('',#31537);
#833=PLANE('',#31539);
#834=PLANE('',#31541);
#835=PLANE('',#31543);
#836=PLANE('',#31545);
#837=PLANE('',#31547);
#838=PLANE('',#31549);
#839=PLANE('',#31551);
#840=PLANE('',#31552);
#841=PLANE('',#31554);
#842=PLANE('',#31556);
#843=PLANE('',#31558);
#844=PLANE('',#31560);
#845=PLANE('',#31562);
#846=PLANE('',#31564);
#847=PLANE('',#31566);
#848=PLANE('',#31568);
#849=PLANE('',#31570);
#850=PLANE('',#31572);
#851=PLANE('',#31574);
#852=PLANE('',#31576);
#853=PLANE('',#31578);
#854=PLANE('',#31580);
#855=PLANE('',#31582);
#856=PLANE('',#31584);
#857=PLANE('',#31586);
#858=PLANE('',#31588);
#859=PLANE('',#31589);
#860=PLANE('',#31591);
#861=PLANE('',#31593);
#862=PLANE('',#31594);
#863=PLANE('',#31596);
#864=PLANE('',#31597);
#865=PLANE('',#31599);
#866=PLANE('',#31608);
#867=PLANE('',#31610);
#868=PLANE('',#31613);
#869=PLANE('',#31616);
#870=PLANE('',#31619);
#871=PLANE('',#31622);
#872=PLANE('',#31625);
#873=PLANE('',#31627);
#874=PLANE('',#31629);
#875=PLANE('',#31632);
#876=PLANE('',#31634);
#877=PLANE('',#31636);
#878=PLANE('',#31638);
#879=PLANE('',#31640);
#880=PLANE('',#31642);
#881=PLANE('',#31644);
#882=PLANE('',#31646);
#883=PLANE('',#31647);
#884=PLANE('',#31649);
#885=PLANE('',#31651);
#886=PLANE('',#31653);
#887=PLANE('',#31655);
#888=PLANE('',#31657);
#889=PLANE('',#31659);
#890=PLANE('',#31661);
#891=PLANE('',#31663);
#892=PLANE('',#31665);
#893=PLANE('',#31667);
#894=PLANE('',#31669);
#895=PLANE('',#31671);
#896=PLANE('',#31673);
#897=PLANE('',#31675);
#898=PLANE('',#31677);
#899=PLANE('',#31679);
#900=PLANE('',#31682);
#901=PLANE('',#31684);
#902=PLANE('',#31686);
#903=PLANE('',#31688);
#904=PLANE('',#31690);
#905=PLANE('',#31692);
#906=PLANE('',#31694);
#907=PLANE('',#31696);
#908=PLANE('',#31697);
#909=PLANE('',#31699);
#910=PLANE('',#31701);
#911=PLANE('',#31703);
#912=PLANE('',#31705);
#913=PLANE('',#31707);
#914=PLANE('',#31709);
#915=PLANE('',#31711);
#916=PLANE('',#31713);
#917=PLANE('',#31715);
#918=PLANE('',#31717);
#919=PLANE('',#31719);
#920=PLANE('',#31721);
#921=PLANE('',#31724);
#922=PLANE('',#31726);
#923=PLANE('',#31728);
#924=PLANE('',#31730);
#925=PLANE('',#31732);
#926=PLANE('',#31734);
#927=PLANE('',#31736);
#928=PLANE('',#31738);
#929=PLANE('',#31740);
#930=PLANE('',#31742);
#931=PLANE('',#31744);
#932=PLANE('',#31746);
#933=PLANE('',#31748);
#934=PLANE('',#31750);
#935=PLANE('',#31752);
#936=PLANE('',#31754);
#937=PLANE('',#31756);
#938=PLANE('',#31757);
#939=PLANE('',#31759);
#940=PLANE('',#31761);
#941=PLANE('',#31763);
#942=PLANE('',#31765);
#943=PLANE('',#31767);
#944=PLANE('',#31769);
#945=PLANE('',#31776);
#946=PLANE('',#31777);
#947=PLANE('',#31778);
#948=PLANE('',#31781);
#949=PLANE('',#31782);
#950=PLANE('',#31784);
#951=PLANE('',#31785);
#952=PLANE('',#31786);
#953=PLANE('',#31789);
#954=PLANE('',#31790);
#955=PLANE('',#31791);
#956=PLANE('',#31794);
#957=PLANE('',#31795);
#958=PLANE('',#31796);
#959=PLANE('',#31799);
#960=PLANE('',#31800);
#961=PLANE('',#31801);
#962=PLANE('',#31804);
#963=PLANE('',#31805);
#964=PLANE('',#31806);
#965=PLANE('',#31809);
#966=PLANE('',#31810);
#967=PLANE('',#31812);
#968=PLANE('',#31814);
#969=PLANE('',#31816);
#970=PLANE('',#31818);
#971=PLANE('',#31820);
#972=PLANE('',#31822);
#973=PLANE('',#31824);
#974=PLANE('',#31826);
#975=PLANE('',#31828);
#976=PLANE('',#31829);
#977=PLANE('',#31831);
#978=PLANE('',#31833);
#979=PLANE('',#31835);
#980=PLANE('',#31837);
#981=PLANE('',#31839);
#982=PLANE('',#31841);
#983=PLANE('',#31843);
#984=PLANE('',#31845);
#985=PLANE('',#31847);
#986=PLANE('',#31849);
#987=PLANE('',#31851);
#988=PLANE('',#31853);
#989=PLANE('',#31855);
#990=PLANE('',#31857);
#991=PLANE('',#31858);
#992=PLANE('',#31860);
#993=PLANE('',#31862);
#994=PLANE('',#31864);
#995=PLANE('',#31866);
#996=PLANE('',#31868);
#997=PLANE('',#31870);
#998=PLANE('',#31872);
#999=PLANE('',#31874);
#1000=PLANE('',#31876);
#1001=PLANE('',#31877);
#1002=PLANE('',#31879);
#1003=PLANE('',#31881);
#1004=PLANE('',#31883);
#1005=PLANE('',#31885);
#1006=PLANE('',#31887);
#1007=PLANE('',#31889);
#1008=PLANE('',#31891);
#1009=PLANE('',#31893);
#1010=PLANE('',#31895);
#1011=PLANE('',#31897);
#1012=PLANE('',#31898);
#1013=PLANE('',#31900);
#1014=PLANE('',#31902);
#1015=PLANE('',#31904);
#1016=PLANE('',#31906);
#1017=PLANE('',#31908);
#1018=PLANE('',#31910);
#1019=PLANE('',#31912);
#1020=PLANE('',#31914);
#1021=PLANE('',#31916);
#1022=PLANE('',#31918);
#1023=PLANE('',#31920);
#1024=PLANE('',#31922);
#1025=PLANE('',#31924);
#1026=PLANE('',#31926);
#1027=PLANE('',#31928);
#1028=PLANE('',#31930);
#1029=PLANE('',#31932);
#1030=PLANE('',#31934);
#1031=PLANE('',#31935);
#1032=PLANE('',#31937);
#1033=PLANE('',#31939);
#1034=PLANE('',#31940);
#1035=PLANE('',#31942);
#1036=PLANE('',#31943);
#1037=PLANE('',#31945);
#1038=PLANE('',#31954);
#1039=PLANE('',#31956);
#1040=PLANE('',#31959);
#1041=PLANE('',#31962);
#1042=PLANE('',#31965);
#1043=PLANE('',#31968);
#1044=PLANE('',#31971);
#1045=PLANE('',#31973);
#1046=PLANE('',#31975);
#1047=PLANE('',#31978);
#1048=PLANE('',#31980);
#1049=PLANE('',#31982);
#1050=PLANE('',#31984);
#1051=PLANE('',#31986);
#1052=PLANE('',#31988);
#1053=PLANE('',#31990);
#1054=PLANE('',#31992);
#1055=PLANE('',#31993);
#1056=PLANE('',#31995);
#1057=PLANE('',#31997);
#1058=PLANE('',#31999);
#1059=PLANE('',#32001);
#1060=PLANE('',#32003);
#1061=PLANE('',#32005);
#1062=PLANE('',#32007);
#1063=PLANE('',#32009);
#1064=PLANE('',#32011);
#1065=PLANE('',#32013);
#1066=PLANE('',#32015);
#1067=PLANE('',#32017);
#1068=PLANE('',#32019);
#1069=PLANE('',#32021);
#1070=PLANE('',#32023);
#1071=PLANE('',#32025);
#1072=PLANE('',#32028);
#1073=PLANE('',#32030);
#1074=PLANE('',#32032);
#1075=PLANE('',#32034);
#1076=PLANE('',#32036);
#1077=PLANE('',#32038);
#1078=PLANE('',#32040);
#1079=PLANE('',#32042);
#1080=PLANE('',#32043);
#1081=PLANE('',#32045);
#1082=PLANE('',#32047);
#1083=PLANE('',#32049);
#1084=PLANE('',#32051);
#1085=PLANE('',#32053);
#1086=PLANE('',#32055);
#1087=PLANE('',#32057);
#1088=PLANE('',#32059);
#1089=PLANE('',#32061);
#1090=PLANE('',#32063);
#1091=PLANE('',#32065);
#1092=PLANE('',#32067);
#1093=PLANE('',#32070);
#1094=PLANE('',#32072);
#1095=PLANE('',#32074);
#1096=PLANE('',#32076);
#1097=PLANE('',#32078);
#1098=PLANE('',#32080);
#1099=PLANE('',#32082);
#1100=PLANE('',#32084);
#1101=PLANE('',#32086);
#1102=PLANE('',#32088);
#1103=PLANE('',#32090);
#1104=PLANE('',#32092);
#1105=PLANE('',#32094);
#1106=PLANE('',#32096);
#1107=PLANE('',#32098);
#1108=PLANE('',#32100);
#1109=PLANE('',#32102);
#1110=PLANE('',#32103);
#1111=PLANE('',#32105);
#1112=PLANE('',#32107);
#1113=PLANE('',#32109);
#1114=PLANE('',#32111);
#1115=PLANE('',#32113);
#1116=PLANE('',#32115);
#1117=PLANE('',#32122);
#1118=PLANE('',#32123);
#1119=PLANE('',#32124);
#1120=PLANE('',#32127);
#1121=PLANE('',#32128);
#1122=PLANE('',#32130);
#1123=PLANE('',#32131);
#1124=PLANE('',#32132);
#1125=PLANE('',#32135);
#1126=PLANE('',#32136);
#1127=PLANE('',#32137);
#1128=PLANE('',#32140);
#1129=PLANE('',#32141);
#1130=PLANE('',#32142);
#1131=PLANE('',#32145);
#1132=PLANE('',#32146);
#1133=PLANE('',#32147);
#1134=PLANE('',#32150);
#1135=PLANE('',#32151);
#1136=PLANE('',#32152);
#1137=PLANE('',#32155);
#1138=PLANE('',#32156);
#1139=PLANE('',#32158);
#1140=PLANE('',#32160);
#1141=PLANE('',#32162);
#1142=PLANE('',#32164);
#1143=PLANE('',#32166);
#1144=PLANE('',#32168);
#1145=PLANE('',#32170);
#1146=PLANE('',#32172);
#1147=PLANE('',#32174);
#1148=PLANE('',#32175);
#1149=PLANE('',#32177);
#1150=PLANE('',#32179);
#1151=PLANE('',#32181);
#1152=PLANE('',#32183);
#1153=PLANE('',#32185);
#1154=PLANE('',#32187);
#1155=PLANE('',#32189);
#1156=PLANE('',#32191);
#1157=PLANE('',#32193);
#1158=PLANE('',#32195);
#1159=PLANE('',#32197);
#1160=PLANE('',#32199);
#1161=PLANE('',#32201);
#1162=PLANE('',#32203);
#1163=PLANE('',#32204);
#1164=PLANE('',#32206);
#1165=PLANE('',#32208);
#1166=PLANE('',#32210);
#1167=PLANE('',#32212);
#1168=PLANE('',#32214);
#1169=PLANE('',#32216);
#1170=PLANE('',#32218);
#1171=PLANE('',#32220);
#1172=PLANE('',#32222);
#1173=PLANE('',#32223);
#1174=PLANE('',#32225);
#1175=PLANE('',#32227);
#1176=PLANE('',#32229);
#1177=PLANE('',#32231);
#1178=PLANE('',#32233);
#1179=PLANE('',#32235);
#1180=PLANE('',#32237);
#1181=PLANE('',#32239);
#1182=PLANE('',#32241);
#1183=PLANE('',#32243);
#1184=PLANE('',#32244);
#1185=PLANE('',#32246);
#1186=PLANE('',#32248);
#1187=PLANE('',#32250);
#1188=PLANE('',#32252);
#1189=PLANE('',#32254);
#1190=PLANE('',#32256);
#1191=PLANE('',#32258);
#1192=PLANE('',#32260);
#1193=PLANE('',#32262);
#1194=PLANE('',#32264);
#1195=PLANE('',#32266);
#1196=PLANE('',#32268);
#1197=PLANE('',#32270);
#1198=PLANE('',#32272);
#1199=PLANE('',#32274);
#1200=PLANE('',#32276);
#1201=PLANE('',#32278);
#1202=PLANE('',#32280);
#1203=PLANE('',#32281);
#1204=PLANE('',#32283);
#1205=PLANE('',#32285);
#1206=PLANE('',#32286);
#1207=PLANE('',#32288);
#1208=PLANE('',#32289);
#1209=PLANE('',#32291);
#1210=PLANE('',#32299);
#1211=PLANE('',#32301);
#1212=PLANE('',#32304);
#1213=PLANE('',#32307);
#1214=PLANE('',#32310);
#1215=PLANE('',#32313);
#1216=PLANE('',#32316);
#1217=PLANE('',#32317);
#1218=PLANE('',#32319);
#1219=PLANE('',#32321);
#1220=PLANE('',#32323);
#1221=PLANE('',#32325);
#1222=PLANE('',#32327);
#1223=PLANE('',#32329);
#1224=PLANE('',#32331);
#1225=PLANE('',#32333);
#1226=PLANE('',#32335);
#1227=PLANE('',#32336);
#1228=PLANE('',#32338);
#1229=PLANE('',#32340);
#1230=PLANE('',#32342);
#1231=PLANE('',#32344);
#1232=PLANE('',#32346);
#1233=PLANE('',#32348);
#1234=PLANE('',#32350);
#1235=PLANE('',#32352);
#1236=PLANE('',#32354);
#1237=PLANE('',#32356);
#1238=PLANE('',#32358);
#1239=PLANE('',#32360);
#1240=PLANE('',#32362);
#1241=PLANE('',#32364);
#1242=PLANE('',#32365);
#1243=PLANE('',#32367);
#1244=PLANE('',#32369);
#1245=PLANE('',#32371);
#1246=PLANE('',#32373);
#1247=PLANE('',#32375);
#1248=PLANE('',#32377);
#1249=PLANE('',#32379);
#1250=PLANE('',#32381);
#1251=PLANE('',#32383);
#1252=PLANE('',#32384);
#1253=PLANE('',#32386);
#1254=PLANE('',#32388);
#1255=PLANE('',#32390);
#1256=PLANE('',#32392);
#1257=PLANE('',#32394);
#1258=PLANE('',#32396);
#1259=PLANE('',#32398);
#1260=PLANE('',#32400);
#1261=PLANE('',#32402);
#1262=PLANE('',#32404);
#1263=PLANE('',#32405);
#1264=PLANE('',#32407);
#1265=PLANE('',#32409);
#1266=PLANE('',#32411);
#1267=PLANE('',#32413);
#1268=PLANE('',#32415);
#1269=PLANE('',#32417);
#1270=PLANE('',#32419);
#1271=PLANE('',#32421);
#1272=PLANE('',#32423);
#1273=PLANE('',#32425);
#1274=PLANE('',#32427);
#1275=PLANE('',#32429);
#1276=PLANE('',#32431);
#1277=PLANE('',#32433);
#1278=PLANE('',#32435);
#1279=PLANE('',#32437);
#1280=PLANE('',#32439);
#1281=PLANE('',#32441);
#1282=PLANE('',#32442);
#1283=PLANE('',#32444);
#1284=PLANE('',#32446);
#1285=PLANE('',#32447);
#1286=PLANE('',#32449);
#1287=PLANE('',#32450);
#1288=PLANE('',#32452);
#1289=LINE('',#40891,#4098);
#1290=LINE('',#40896,#4099);
#1291=LINE('',#40901,#4100);
#1292=LINE('',#40907,#4101);
#1293=LINE('',#40912,#4102);
#1294=LINE('',#40920,#4103);
#1295=LINE('',#40924,#4104);
#1296=LINE('',#40928,#4105);
#1297=LINE('',#40932,#4106);
#1298=LINE('',#40938,#4107);
#1299=LINE('',#40942,#4108);
#1300=LINE('',#40950,#4109);
#1301=LINE('',#40953,#4110);
#1302=LINE('',#40958,#4111);
#1303=LINE('',#40962,#4112);
#1304=LINE('',#40966,#4113);
#1305=LINE('',#40969,#4114);
#1306=LINE('',#40974,#4115);
#1307=LINE('',#40978,#4116);
#1308=LINE('',#40982,#4117);
#1309=LINE('',#40985,#4118);
#1310=LINE('',#40990,#4119);
#1311=LINE('',#40994,#4120);
#1312=LINE('',#40998,#4121);
#1313=LINE('',#41001,#4122);
#1314=LINE('',#41006,#4123);
#1315=LINE('',#41010,#4124);
#1316=LINE('',#41014,#4125);
#1317=LINE('',#41017,#4126);
#1318=LINE('',#41020,#4127);
#1319=LINE('',#41024,#4128);
#1320=LINE('',#41028,#4129);
#1321=LINE('',#41032,#4130);
#1322=LINE('',#41036,#4131);
#1323=LINE('',#41040,#4132);
#1324=LINE('',#41044,#4133);
#1325=LINE('',#41048,#4134);
#1326=LINE('',#41052,#4135);
#1327=LINE('',#41056,#4136);
#1328=LINE('',#41060,#4137);
#1329=LINE('',#41064,#4138);
#1330=LINE('',#41068,#4139);
#1331=LINE('',#41072,#4140);
#1332=LINE('',#41076,#4141);
#1333=LINE('',#41080,#4142);
#1334=LINE('',#41084,#4143);
#1335=LINE('',#41088,#4144);
#1336=LINE('',#41092,#4145);
#1337=LINE('',#41096,#4146);
#1338=LINE('',#41100,#4147);
#1339=LINE('',#41104,#4148);
#1340=LINE('',#41108,#4149);
#1341=LINE('',#41112,#4150);
#1342=LINE('',#41116,#4151);
#1343=LINE('',#41120,#4152);
#1344=LINE('',#41124,#4153);
#1345=LINE('',#41128,#4154);
#1346=LINE('',#41132,#4155);
#1347=LINE('',#41136,#4156);
#1348=LINE('',#41140,#4157);
#1349=LINE('',#41144,#4158);
#1350=LINE('',#41148,#4159);
#1351=LINE('',#41152,#4160);
#1352=LINE('',#41156,#4161);
#1353=LINE('',#41160,#4162);
#1354=LINE('',#41164,#4163);
#1355=LINE('',#41168,#4164);
#1356=LINE('',#41188,#4165);
#1357=LINE('',#41192,#4166);
#1358=LINE('',#41196,#4167);
#1359=LINE('',#41200,#4168);
#1360=LINE('',#41204,#4169);
#1361=LINE('',#41221,#4170);
#1362=LINE('',#41225,#4171);
#1363=LINE('',#41229,#4172);
#1364=LINE('',#41255,#4173);
#1365=LINE('',#41259,#4174);
#1366=LINE('',#41263,#4175);
#1367=LINE('',#41283,#4176);
#1368=LINE('',#41287,#4177);
#1369=LINE('',#41291,#4178);
#1370=LINE('',#41303,#4179);
#1371=LINE('',#41307,#4180);
#1372=LINE('',#41311,#4181);
#1373=LINE('',#41314,#4182);
#1374=LINE('',#41319,#4183);
#1375=LINE('',#41323,#4184);
#1376=LINE('',#41327,#4185);
#1377=LINE('',#41330,#4186);
#1378=LINE('',#41335,#4187);
#1379=LINE('',#41339,#4188);
#1380=LINE('',#41343,#4189);
#1381=LINE('',#41346,#4190);
#1382=LINE('',#41351,#4191);
#1383=LINE('',#41355,#4192);
#1384=LINE('',#41359,#4193);
#1385=LINE('',#41362,#4194);
#1386=LINE('',#41367,#4195);
#1387=LINE('',#41371,#4196);
#1388=LINE('',#41375,#4197);
#1389=LINE('',#41378,#4198);
#1390=LINE('',#41383,#4199);
#1391=LINE('',#41387,#4200);
#1392=LINE('',#41391,#4201);
#1393=LINE('',#41394,#4202);
#1394=LINE('',#41399,#4203);
#1395=LINE('',#41403,#4204);
#1396=LINE('',#41407,#4205);
#1397=LINE('',#41410,#4206);
#1398=LINE('',#41415,#4207);
#1399=LINE('',#41419,#4208);
#1400=LINE('',#41423,#4209);
#1401=LINE('',#41426,#4210);
#1402=LINE('',#41431,#4211);
#1403=LINE('',#41435,#4212);
#1404=LINE('',#41439,#4213);
#1405=LINE('',#41442,#4214);
#1406=LINE('',#41447,#4215);
#1407=LINE('',#41451,#4216);
#1408=LINE('',#41455,#4217);
#1409=LINE('',#41458,#4218);
#1410=LINE('',#41463,#4219);
#1411=LINE('',#41467,#4220);
#1412=LINE('',#41471,#4221);
#1413=LINE('',#41474,#4222);
#1414=LINE('',#41479,#4223);
#1415=LINE('',#41483,#4224);
#1416=LINE('',#41487,#4225);
#1417=LINE('',#41490,#4226);
#1418=LINE('',#41495,#4227);
#1419=LINE('',#41499,#4228);
#1420=LINE('',#41503,#4229);
#1421=LINE('',#41506,#4230);
#1422=LINE('',#41509,#4231);
#1423=LINE('',#41513,#4232);
#1424=LINE('',#41517,#4233);
#1425=LINE('',#41521,#4234);
#1426=LINE('',#41541,#4235);
#1427=LINE('',#41545,#4236);
#1428=LINE('',#41549,#4237);
#1429=LINE('',#41572,#4238);
#1430=LINE('',#41576,#4239);
#1431=LINE('',#41580,#4240);
#1432=LINE('',#41600,#4241);
#1433=LINE('',#41604,#4242);
#1434=LINE('',#41608,#4243);
#1435=LINE('',#41620,#4244);
#1436=LINE('',#41624,#4245);
#1437=LINE('',#41628,#4246);
#1438=LINE('',#41631,#4247);
#1439=LINE('',#41636,#4248);
#1440=LINE('',#41640,#4249);
#1441=LINE('',#41644,#4250);
#1442=LINE('',#41647,#4251);
#1443=LINE('',#41652,#4252);
#1444=LINE('',#41656,#4253);
#1445=LINE('',#41660,#4254);
#1446=LINE('',#41663,#4255);
#1447=LINE('',#41668,#4256);
#1448=LINE('',#41672,#4257);
#1449=LINE('',#41676,#4258);
#1450=LINE('',#41679,#4259);
#1451=LINE('',#41684,#4260);
#1452=LINE('',#41688,#4261);
#1453=LINE('',#41692,#4262);
#1454=LINE('',#41695,#4263);
#1455=LINE('',#41700,#4264);
#1456=LINE('',#41704,#4265);
#1457=LINE('',#41708,#4266);
#1458=LINE('',#41711,#4267);
#1459=LINE('',#41716,#4268);
#1460=LINE('',#41720,#4269);
#1461=LINE('',#41724,#4270);
#1462=LINE('',#41727,#4271);
#1463=LINE('',#41732,#4272);
#1464=LINE('',#41736,#4273);
#1465=LINE('',#41740,#4274);
#1466=LINE('',#41743,#4275);
#1467=LINE('',#41748,#4276);
#1468=LINE('',#41752,#4277);
#1469=LINE('',#41756,#4278);
#1470=LINE('',#41759,#4279);
#1471=LINE('',#41764,#4280);
#1472=LINE('',#41768,#4281);
#1473=LINE('',#41772,#4282);
#1474=LINE('',#41775,#4283);
#1475=LINE('',#41780,#4284);
#1476=LINE('',#41784,#4285);
#1477=LINE('',#41788,#4286);
#1478=LINE('',#41791,#4287);
#1479=LINE('',#41796,#4288);
#1480=LINE('',#41800,#4289);
#1481=LINE('',#41804,#4290);
#1482=LINE('',#41807,#4291);
#1483=LINE('',#41812,#4292);
#1484=LINE('',#41816,#4293);
#1485=LINE('',#41820,#4294);
#1486=LINE('',#41823,#4295);
#1487=LINE('',#41828,#4296);
#1488=LINE('',#41832,#4297);
#1489=LINE('',#41840,#4298);
#1490=LINE('',#41843,#4299);
#1491=LINE('',#41848,#4300);
#1492=LINE('',#41852,#4301);
#1493=LINE('',#41856,#4302);
#1494=LINE('',#41859,#4303);
#1495=LINE('',#41864,#4304);
#1496=LINE('',#41868,#4305);
#1497=LINE('',#41872,#4306);
#1498=LINE('',#41875,#4307);
#1499=LINE('',#41880,#4308);
#1500=LINE('',#41884,#4309);
#1501=LINE('',#41888,#4310);
#1502=LINE('',#41891,#4311);
#1503=LINE('',#41894,#4312);
#1504=LINE('',#41898,#4313);
#1505=LINE('',#41902,#4314);
#1506=LINE('',#41906,#4315);
#1507=LINE('',#41910,#4316);
#1508=LINE('',#41914,#4317);
#1509=LINE('',#41918,#4318);
#1510=LINE('',#41922,#4319);
#1511=LINE('',#41926,#4320);
#1512=LINE('',#41930,#4321);
#1513=LINE('',#41934,#4322);
#1514=LINE('',#41938,#4323);
#1515=LINE('',#41942,#4324);
#1516=LINE('',#41946,#4325);
#1517=LINE('',#41950,#4326);
#1518=LINE('',#41954,#4327);
#1519=LINE('',#41958,#4328);
#1520=LINE('',#41962,#4329);
#1521=LINE('',#41966,#4330);
#1522=LINE('',#41970,#4331);
#1523=LINE('',#41974,#4332);
#1524=LINE('',#41978,#4333);
#1525=LINE('',#41998,#4334);
#1526=LINE('',#42002,#4335);
#1527=LINE('',#42006,#4336);
#1528=LINE('',#42010,#4337);
#1529=LINE('',#42014,#4338);
#1530=LINE('',#42031,#4339);
#1531=LINE('',#42035,#4340);
#1532=LINE('',#42039,#4341);
#1533=LINE('',#42065,#4342);
#1534=LINE('',#42069,#4343);
#1535=LINE('',#42073,#4344);
#1536=LINE('',#42093,#4345);
#1537=LINE('',#42097,#4346);
#1538=LINE('',#42101,#4347);
#1539=LINE('',#42113,#4348);
#1540=LINE('',#42117,#4349);
#1541=LINE('',#42121,#4350);
#1542=LINE('',#42124,#4351);
#1543=LINE('',#42129,#4352);
#1544=LINE('',#42133,#4353);
#1545=LINE('',#42137,#4354);
#1546=LINE('',#42140,#4355);
#1547=LINE('',#42145,#4356);
#1548=LINE('',#42149,#4357);
#1549=LINE('',#42153,#4358);
#1550=LINE('',#42156,#4359);
#1551=LINE('',#42161,#4360);
#1552=LINE('',#42165,#4361);
#1553=LINE('',#42169,#4362);
#1554=LINE('',#42172,#4363);
#1555=LINE('',#42177,#4364);
#1556=LINE('',#42181,#4365);
#1557=LINE('',#42185,#4366);
#1558=LINE('',#42188,#4367);
#1559=LINE('',#42193,#4368);
#1560=LINE('',#42197,#4369);
#1561=LINE('',#42201,#4370);
#1562=LINE('',#42204,#4371);
#1563=LINE('',#42209,#4372);
#1564=LINE('',#42213,#4373);
#1565=LINE('',#42217,#4374);
#1566=LINE('',#42220,#4375);
#1567=LINE('',#42225,#4376);
#1568=LINE('',#42229,#4377);
#1569=LINE('',#42233,#4378);
#1570=LINE('',#42236,#4379);
#1571=LINE('',#42241,#4380);
#1572=LINE('',#42245,#4381);
#1573=LINE('',#42249,#4382);
#1574=LINE('',#42252,#4383);
#1575=LINE('',#42257,#4384);
#1576=LINE('',#42261,#4385);
#1577=LINE('',#42265,#4386);
#1578=LINE('',#42268,#4387);
#1579=LINE('',#42273,#4388);
#1580=LINE('',#42277,#4389);
#1581=LINE('',#42281,#4390);
#1582=LINE('',#42284,#4391);
#1583=LINE('',#42289,#4392);
#1584=LINE('',#42293,#4393);
#1585=LINE('',#42297,#4394);
#1586=LINE('',#42300,#4395);
#1587=LINE('',#42305,#4396);
#1588=LINE('',#42309,#4397);
#1589=LINE('',#42313,#4398);
#1590=LINE('',#42316,#4399);
#1591=LINE('',#42319,#4400);
#1592=LINE('',#42323,#4401);
#1593=LINE('',#42327,#4402);
#1594=LINE('',#42331,#4403);
#1595=LINE('',#42351,#4404);
#1596=LINE('',#42355,#4405);
#1597=LINE('',#42359,#4406);
#1598=LINE('',#42382,#4407);
#1599=LINE('',#42386,#4408);
#1600=LINE('',#42390,#4409);
#1601=LINE('',#42410,#4410);
#1602=LINE('',#42414,#4411);
#1603=LINE('',#42418,#4412);
#1604=LINE('',#42430,#4413);
#1605=LINE('',#42434,#4414);
#1606=LINE('',#42438,#4415);
#1607=LINE('',#42441,#4416);
#1608=LINE('',#42446,#4417);
#1609=LINE('',#42450,#4418);
#1610=LINE('',#42454,#4419);
#1611=LINE('',#42457,#4420);
#1612=LINE('',#42462,#4421);
#1613=LINE('',#42466,#4422);
#1614=LINE('',#42470,#4423);
#1615=LINE('',#42473,#4424);
#1616=LINE('',#42478,#4425);
#1617=LINE('',#42482,#4426);
#1618=LINE('',#42486,#4427);
#1619=LINE('',#42489,#4428);
#1620=LINE('',#42494,#4429);
#1621=LINE('',#42498,#4430);
#1622=LINE('',#42502,#4431);
#1623=LINE('',#42505,#4432);
#1624=LINE('',#42510,#4433);
#1625=LINE('',#42514,#4434);
#1626=LINE('',#42518,#4435);
#1627=LINE('',#42521,#4436);
#1628=LINE('',#42526,#4437);
#1629=LINE('',#42530,#4438);
#1630=LINE('',#42534,#4439);
#1631=LINE('',#42537,#4440);
#1632=LINE('',#42542,#4441);
#1633=LINE('',#42546,#4442);
#1634=LINE('',#42550,#4443);
#1635=LINE('',#42553,#4444);
#1636=LINE('',#42558,#4445);
#1637=LINE('',#42562,#4446);
#1638=LINE('',#42566,#4447);
#1639=LINE('',#42569,#4448);
#1640=LINE('',#42574,#4449);
#1641=LINE('',#42578,#4450);
#1642=LINE('',#42582,#4451);
#1643=LINE('',#42585,#4452);
#1644=LINE('',#42590,#4453);
#1645=LINE('',#42594,#4454);
#1646=LINE('',#42598,#4455);
#1647=LINE('',#42601,#4456);
#1648=LINE('',#42606,#4457);
#1649=LINE('',#42610,#4458);
#1650=LINE('',#42614,#4459);
#1651=LINE('',#42617,#4460);
#1652=LINE('',#42622,#4461);
#1653=LINE('',#42626,#4462);
#1654=LINE('',#42630,#4463);
#1655=LINE('',#42633,#4464);
#1656=LINE('',#42638,#4465);
#1657=LINE('',#42642,#4466);
#1658=LINE('',#42650,#4467);
#1659=LINE('',#42653,#4468);
#1660=LINE('',#42658,#4469);
#1661=LINE('',#42662,#4470);
#1662=LINE('',#42666,#4471);
#1663=LINE('',#42669,#4472);
#1664=LINE('',#42674,#4473);
#1665=LINE('',#42678,#4474);
#1666=LINE('',#42682,#4475);
#1667=LINE('',#42685,#4476);
#1668=LINE('',#42690,#4477);
#1669=LINE('',#42694,#4478);
#1670=LINE('',#42698,#4479);
#1671=LINE('',#42701,#4480);
#1672=LINE('',#42704,#4481);
#1673=LINE('',#42708,#4482);
#1674=LINE('',#42712,#4483);
#1675=LINE('',#42716,#4484);
#1676=LINE('',#42720,#4485);
#1677=LINE('',#42724,#4486);
#1678=LINE('',#42728,#4487);
#1679=LINE('',#42732,#4488);
#1680=LINE('',#42736,#4489);
#1681=LINE('',#42740,#4490);
#1682=LINE('',#42744,#4491);
#1683=LINE('',#42748,#4492);
#1684=LINE('',#42752,#4493);
#1685=LINE('',#42756,#4494);
#1686=LINE('',#42760,#4495);
#1687=LINE('',#42764,#4496);
#1688=LINE('',#42768,#4497);
#1689=LINE('',#42772,#4498);
#1690=LINE('',#42776,#4499);
#1691=LINE('',#42780,#4500);
#1692=LINE('',#42784,#4501);
#1693=LINE('',#42788,#4502);
#1694=LINE('',#42808,#4503);
#1695=LINE('',#42812,#4504);
#1696=LINE('',#42816,#4505);
#1697=LINE('',#42820,#4506);
#1698=LINE('',#42824,#4507);
#1699=LINE('',#42841,#4508);
#1700=LINE('',#42845,#4509);
#1701=LINE('',#42849,#4510);
#1702=LINE('',#42875,#4511);
#1703=LINE('',#42879,#4512);
#1704=LINE('',#42883,#4513);
#1705=LINE('',#42903,#4514);
#1706=LINE('',#42907,#4515);
#1707=LINE('',#42911,#4516);
#1708=LINE('',#42923,#4517);
#1709=LINE('',#42927,#4518);
#1710=LINE('',#42931,#4519);
#1711=LINE('',#42934,#4520);
#1712=LINE('',#42939,#4521);
#1713=LINE('',#42943,#4522);
#1714=LINE('',#42947,#4523);
#1715=LINE('',#42950,#4524);
#1716=LINE('',#42955,#4525);
#1717=LINE('',#42959,#4526);
#1718=LINE('',#42963,#4527);
#1719=LINE('',#42966,#4528);
#1720=LINE('',#42971,#4529);
#1721=LINE('',#42975,#4530);
#1722=LINE('',#42979,#4531);
#1723=LINE('',#42982,#4532);
#1724=LINE('',#42987,#4533);
#1725=LINE('',#42991,#4534);
#1726=LINE('',#42995,#4535);
#1727=LINE('',#42998,#4536);
#1728=LINE('',#43003,#4537);
#1729=LINE('',#43007,#4538);
#1730=LINE('',#43011,#4539);
#1731=LINE('',#43014,#4540);
#1732=LINE('',#43019,#4541);
#1733=LINE('',#43023,#4542);
#1734=LINE('',#43027,#4543);
#1735=LINE('',#43030,#4544);
#1736=LINE('',#43035,#4545);
#1737=LINE('',#43039,#4546);
#1738=LINE('',#43043,#4547);
#1739=LINE('',#43046,#4548);
#1740=LINE('',#43051,#4549);
#1741=LINE('',#43055,#4550);
#1742=LINE('',#43059,#4551);
#1743=LINE('',#43062,#4552);
#1744=LINE('',#43067,#4553);
#1745=LINE('',#43071,#4554);
#1746=LINE('',#43075,#4555);
#1747=LINE('',#43078,#4556);
#1748=LINE('',#43083,#4557);
#1749=LINE('',#43087,#4558);
#1750=LINE('',#43091,#4559);
#1751=LINE('',#43094,#4560);
#1752=LINE('',#43099,#4561);
#1753=LINE('',#43103,#4562);
#1754=LINE('',#43107,#4563);
#1755=LINE('',#43110,#4564);
#1756=LINE('',#43115,#4565);
#1757=LINE('',#43119,#4566);
#1758=LINE('',#43123,#4567);
#1759=LINE('',#43126,#4568);
#1760=LINE('',#43129,#4569);
#1761=LINE('',#43133,#4570);
#1762=LINE('',#43137,#4571);
#1763=LINE('',#43141,#4572);
#1764=LINE('',#43161,#4573);
#1765=LINE('',#43165,#4574);
#1766=LINE('',#43169,#4575);
#1767=LINE('',#43192,#4576);
#1768=LINE('',#43196,#4577);
#1769=LINE('',#43200,#4578);
#1770=LINE('',#43220,#4579);
#1771=LINE('',#43224,#4580);
#1772=LINE('',#43228,#4581);
#1773=LINE('',#43240,#4582);
#1774=LINE('',#43244,#4583);
#1775=LINE('',#43248,#4584);
#1776=LINE('',#43251,#4585);
#1777=LINE('',#43256,#4586);
#1778=LINE('',#43260,#4587);
#1779=LINE('',#43264,#4588);
#1780=LINE('',#43267,#4589);
#1781=LINE('',#43272,#4590);
#1782=LINE('',#43276,#4591);
#1783=LINE('',#43280,#4592);
#1784=LINE('',#43283,#4593);
#1785=LINE('',#43288,#4594);
#1786=LINE('',#43292,#4595);
#1787=LINE('',#43296,#4596);
#1788=LINE('',#43299,#4597);
#1789=LINE('',#43304,#4598);
#1790=LINE('',#43308,#4599);
#1791=LINE('',#43312,#4600);
#1792=LINE('',#43315,#4601);
#1793=LINE('',#43320,#4602);
#1794=LINE('',#43324,#4603);
#1795=LINE('',#43328,#4604);
#1796=LINE('',#43331,#4605);
#1797=LINE('',#43336,#4606);
#1798=LINE('',#43340,#4607);
#1799=LINE('',#43344,#4608);
#1800=LINE('',#43347,#4609);
#1801=LINE('',#43352,#4610);
#1802=LINE('',#43356,#4611);
#1803=LINE('',#43360,#4612);
#1804=LINE('',#43363,#4613);
#1805=LINE('',#43368,#4614);
#1806=LINE('',#43372,#4615);
#1807=LINE('',#43376,#4616);
#1808=LINE('',#43379,#4617);
#1809=LINE('',#43384,#4618);
#1810=LINE('',#43388,#4619);
#1811=LINE('',#43392,#4620);
#1812=LINE('',#43395,#4621);
#1813=LINE('',#43400,#4622);
#1814=LINE('',#43404,#4623);
#1815=LINE('',#43408,#4624);
#1816=LINE('',#43411,#4625);
#1817=LINE('',#43416,#4626);
#1818=LINE('',#43420,#4627);
#1819=LINE('',#43424,#4628);
#1820=LINE('',#43427,#4629);
#1821=LINE('',#43432,#4630);
#1822=LINE('',#43436,#4631);
#1823=LINE('',#43440,#4632);
#1824=LINE('',#43443,#4633);
#1825=LINE('',#43446,#4634);
#1826=LINE('',#43450,#4635);
#1827=LINE('',#43454,#4636);
#1828=LINE('',#43458,#4637);
#1829=LINE('',#43462,#4638);
#1830=LINE('',#43466,#4639);
#1831=LINE('',#43470,#4640);
#1832=LINE('',#43474,#4641);
#1833=LINE('',#43478,#4642);
#1834=LINE('',#43482,#4643);
#1835=LINE('',#43486,#4644);
#1836=LINE('',#43490,#4645);
#1837=LINE('',#43494,#4646);
#1838=LINE('',#43498,#4647);
#1839=LINE('',#43502,#4648);
#1840=LINE('',#43506,#4649);
#1841=LINE('',#43510,#4650);
#1842=LINE('',#43514,#4651);
#1843=LINE('',#43518,#4652);
#1844=LINE('',#43522,#4653);
#1845=LINE('',#43526,#4654);
#1846=LINE('',#43530,#4655);
#1847=LINE('',#43550,#4656);
#1848=LINE('',#43554,#4657);
#1849=LINE('',#43558,#4658);
#1850=LINE('',#43562,#4659);
#1851=LINE('',#43566,#4660);
#1852=LINE('',#43583,#4661);
#1853=LINE('',#43587,#4662);
#1854=LINE('',#43591,#4663);
#1855=LINE('',#43617,#4664);
#1856=LINE('',#43621,#4665);
#1857=LINE('',#43625,#4666);
#1858=LINE('',#43645,#4667);
#1859=LINE('',#43649,#4668);
#1860=LINE('',#43653,#4669);
#1861=LINE('',#43665,#4670);
#1862=LINE('',#43669,#4671);
#1863=LINE('',#43673,#4672);
#1864=LINE('',#43676,#4673);
#1865=LINE('',#43681,#4674);
#1866=LINE('',#43685,#4675);
#1867=LINE('',#43689,#4676);
#1868=LINE('',#43692,#4677);
#1869=LINE('',#43697,#4678);
#1870=LINE('',#43701,#4679);
#1871=LINE('',#43705,#4680);
#1872=LINE('',#43708,#4681);
#1873=LINE('',#43713,#4682);
#1874=LINE('',#43717,#4683);
#1875=LINE('',#43721,#4684);
#1876=LINE('',#43724,#4685);
#1877=LINE('',#43729,#4686);
#1878=LINE('',#43733,#4687);
#1879=LINE('',#43737,#4688);
#1880=LINE('',#43740,#4689);
#1881=LINE('',#43745,#4690);
#1882=LINE('',#43749,#4691);
#1883=LINE('',#43753,#4692);
#1884=LINE('',#43756,#4693);
#1885=LINE('',#43761,#4694);
#1886=LINE('',#43765,#4695);
#1887=LINE('',#43769,#4696);
#1888=LINE('',#43772,#4697);
#1889=LINE('',#43777,#4698);
#1890=LINE('',#43781,#4699);
#1891=LINE('',#43785,#4700);
#1892=LINE('',#43788,#4701);
#1893=LINE('',#43793,#4702);
#1894=LINE('',#43797,#4703);
#1895=LINE('',#43801,#4704);
#1896=LINE('',#43804,#4705);
#1897=LINE('',#43809,#4706);
#1898=LINE('',#43813,#4707);
#1899=LINE('',#43817,#4708);
#1900=LINE('',#43820,#4709);
#1901=LINE('',#43825,#4710);
#1902=LINE('',#43829,#4711);
#1903=LINE('',#43833,#4712);
#1904=LINE('',#43836,#4713);
#1905=LINE('',#43841,#4714);
#1906=LINE('',#43845,#4715);
#1907=LINE('',#43849,#4716);
#1908=LINE('',#43852,#4717);
#1909=LINE('',#43857,#4718);
#1910=LINE('',#43861,#4719);
#1911=LINE('',#43865,#4720);
#1912=LINE('',#43868,#4721);
#1913=LINE('',#43887,#4722);
#1914=LINE('',#43891,#4723);
#1915=LINE('',#43895,#4724);
#1916=LINE('',#43918,#4725);
#1917=LINE('',#43922,#4726);
#1918=LINE('',#43926,#4727);
#1919=LINE('',#43946,#4728);
#1920=LINE('',#43950,#4729);
#1921=LINE('',#43954,#4730);
#1922=LINE('',#43966,#4731);
#1923=LINE('',#43970,#4732);
#1924=LINE('',#43974,#4733);
#1925=LINE('',#43977,#4734);
#1926=LINE('',#43982,#4735);
#1927=LINE('',#43986,#4736);
#1928=LINE('',#43990,#4737);
#1929=LINE('',#43993,#4738);
#1930=LINE('',#43998,#4739);
#1931=LINE('',#44002,#4740);
#1932=LINE('',#44006,#4741);
#1933=LINE('',#44009,#4742);
#1934=LINE('',#44014,#4743);
#1935=LINE('',#44018,#4744);
#1936=LINE('',#44022,#4745);
#1937=LINE('',#44025,#4746);
#1938=LINE('',#44030,#4747);
#1939=LINE('',#44034,#4748);
#1940=LINE('',#44038,#4749);
#1941=LINE('',#44041,#4750);
#1942=LINE('',#44046,#4751);
#1943=LINE('',#44050,#4752);
#1944=LINE('',#44054,#4753);
#1945=LINE('',#44057,#4754);
#1946=LINE('',#44062,#4755);
#1947=LINE('',#44066,#4756);
#1948=LINE('',#44070,#4757);
#1949=LINE('',#44073,#4758);
#1950=LINE('',#44078,#4759);
#1951=LINE('',#44082,#4760);
#1952=LINE('',#44086,#4761);
#1953=LINE('',#44089,#4762);
#1954=LINE('',#44094,#4763);
#1955=LINE('',#44098,#4764);
#1956=LINE('',#44102,#4765);
#1957=LINE('',#44105,#4766);
#1958=LINE('',#44110,#4767);
#1959=LINE('',#44114,#4768);
#1960=LINE('',#44118,#4769);
#1961=LINE('',#44121,#4770);
#1962=LINE('',#44126,#4771);
#1963=LINE('',#44130,#4772);
#1964=LINE('',#44134,#4773);
#1965=LINE('',#44137,#4774);
#1966=LINE('',#44142,#4775);
#1967=LINE('',#44146,#4776);
#1968=LINE('',#44150,#4777);
#1969=LINE('',#44153,#4778);
#1970=LINE('',#44158,#4779);
#1971=LINE('',#44162,#4780);
#1972=LINE('',#44166,#4781);
#1973=LINE('',#44169,#4782);
#1974=LINE('',#44175,#4783);
#1975=LINE('',#44179,#4784);
#1976=LINE('',#44196,#4785);
#1977=LINE('',#44212,#4786);
#1978=LINE('',#44216,#4787);
#1979=LINE('',#44220,#4788);
#1980=LINE('',#44236,#4789);
#1981=LINE('',#44248,#4790);
#1982=LINE('',#44252,#4791);
#1983=LINE('',#44256,#4792);
#1984=LINE('',#44267,#4793);
#1985=LINE('',#44271,#4794);
#1986=LINE('',#44275,#4795);
#1987=LINE('',#44278,#4796);
#1988=LINE('',#44283,#4797);
#1989=LINE('',#44287,#4798);
#1990=LINE('',#44291,#4799);
#1991=LINE('',#44294,#4800);
#1992=LINE('',#44299,#4801);
#1993=LINE('',#44303,#4802);
#1994=LINE('',#44307,#4803);
#1995=LINE('',#44310,#4804);
#1996=LINE('',#44315,#4805);
#1997=LINE('',#44319,#4806);
#1998=LINE('',#44323,#4807);
#1999=LINE('',#44326,#4808);
#2000=LINE('',#44331,#4809);
#2001=LINE('',#44335,#4810);
#2002=LINE('',#44339,#4811);
#2003=LINE('',#44342,#4812);
#2004=LINE('',#44347,#4813);
#2005=LINE('',#44351,#4814);
#2006=LINE('',#44355,#4815);
#2007=LINE('',#44358,#4816);
#2008=LINE('',#44363,#4817);
#2009=LINE('',#44367,#4818);
#2010=LINE('',#44371,#4819);
#2011=LINE('',#44374,#4820);
#2012=LINE('',#44379,#4821);
#2013=LINE('',#44383,#4822);
#2014=LINE('',#44387,#4823);
#2015=LINE('',#44390,#4824);
#2016=LINE('',#44395,#4825);
#2017=LINE('',#44399,#4826);
#2018=LINE('',#44403,#4827);
#2019=LINE('',#44406,#4828);
#2020=LINE('',#44411,#4829);
#2021=LINE('',#44415,#4830);
#2022=LINE('',#44419,#4831);
#2023=LINE('',#44422,#4832);
#2024=LINE('',#44427,#4833);
#2025=LINE('',#44431,#4834);
#2026=LINE('',#44435,#4835);
#2027=LINE('',#44438,#4836);
#2028=LINE('',#44443,#4837);
#2029=LINE('',#44447,#4838);
#2030=LINE('',#44451,#4839);
#2031=LINE('',#44454,#4840);
#2032=LINE('',#44459,#4841);
#2033=LINE('',#44463,#4842);
#2034=LINE('',#44467,#4843);
#2035=LINE('',#44470,#4844);
#2036=LINE('',#44473,#4845);
#2037=LINE('',#44491,#4846);
#2038=LINE('',#44495,#4847);
#2039=LINE('',#44512,#4848);
#2040=LINE('',#44516,#4849);
#2041=LINE('',#44520,#4850);
#2042=LINE('',#44535,#4851);
#2043=LINE('',#44548,#4852);
#2044=LINE('',#44552,#4853);
#2045=LINE('',#44556,#4854);
#2046=LINE('',#44567,#4855);
#2047=LINE('',#44571,#4856);
#2048=LINE('',#44575,#4857);
#2049=LINE('',#44578,#4858);
#2050=LINE('',#44583,#4859);
#2051=LINE('',#44587,#4860);
#2052=LINE('',#44591,#4861);
#2053=LINE('',#44594,#4862);
#2054=LINE('',#44599,#4863);
#2055=LINE('',#44603,#4864);
#2056=LINE('',#44607,#4865);
#2057=LINE('',#44610,#4866);
#2058=LINE('',#44615,#4867);
#2059=LINE('',#44619,#4868);
#2060=LINE('',#44623,#4869);
#2061=LINE('',#44626,#4870);
#2062=LINE('',#44631,#4871);
#2063=LINE('',#44635,#4872);
#2064=LINE('',#44639,#4873);
#2065=LINE('',#44642,#4874);
#2066=LINE('',#44647,#4875);
#2067=LINE('',#44651,#4876);
#2068=LINE('',#44655,#4877);
#2069=LINE('',#44658,#4878);
#2070=LINE('',#44663,#4879);
#2071=LINE('',#44667,#4880);
#2072=LINE('',#44671,#4881);
#2073=LINE('',#44674,#4882);
#2074=LINE('',#44679,#4883);
#2075=LINE('',#44683,#4884);
#2076=LINE('',#44687,#4885);
#2077=LINE('',#44690,#4886);
#2078=LINE('',#44695,#4887);
#2079=LINE('',#44699,#4888);
#2080=LINE('',#44703,#4889);
#2081=LINE('',#44706,#4890);
#2082=LINE('',#44711,#4891);
#2083=LINE('',#44715,#4892);
#2084=LINE('',#44719,#4893);
#2085=LINE('',#44722,#4894);
#2086=LINE('',#44727,#4895);
#2087=LINE('',#44731,#4896);
#2088=LINE('',#44735,#4897);
#2089=LINE('',#44738,#4898);
#2090=LINE('',#44743,#4899);
#2091=LINE('',#44747,#4900);
#2092=LINE('',#44751,#4901);
#2093=LINE('',#44754,#4902);
#2094=LINE('',#44759,#4903);
#2095=LINE('',#44763,#4904);
#2096=LINE('',#44767,#4905);
#2097=LINE('',#44770,#4906);
#2098=LINE('',#44773,#4907);
#2099=LINE('',#44777,#4908);
#2100=LINE('',#44781,#4909);
#2101=LINE('',#44801,#4910);
#2102=LINE('',#44805,#4911);
#2103=LINE('',#44809,#4912);
#2104=LINE('',#44812,#4913);
#2105=LINE('',#44817,#4914);
#2106=LINE('',#44821,#4915);
#2107=LINE('',#44825,#4916);
#2108=LINE('',#44828,#4917);
#2109=LINE('',#44833,#4918);
#2110=LINE('',#44837,#4919);
#2111=LINE('',#44841,#4920);
#2112=LINE('',#44844,#4921);
#2113=LINE('',#44849,#4922);
#2114=LINE('',#44853,#4923);
#2115=LINE('',#44857,#4924);
#2116=LINE('',#44860,#4925);
#2117=LINE('',#44863,#4926);
#2118=LINE('',#44867,#4927);
#2119=LINE('',#44871,#4928);
#2120=LINE('',#44875,#4929);
#2121=LINE('',#44879,#4930);
#2122=LINE('',#44883,#4931);
#2123=LINE('',#44887,#4932);
#2124=LINE('',#44891,#4933);
#2125=LINE('',#44895,#4934);
#2126=LINE('',#44899,#4935);
#2127=LINE('',#44903,#4936);
#2128=LINE('',#44907,#4937);
#2129=LINE('',#44911,#4938);
#2130=LINE('',#44915,#4939);
#2131=LINE('',#44919,#4940);
#2132=LINE('',#44923,#4941);
#2133=LINE('',#44927,#4942);
#2134=LINE('',#44931,#4943);
#2135=LINE('',#44935,#4944);
#2136=LINE('',#44939,#4945);
#2137=LINE('',#44943,#4946);
#2138=LINE('',#44947,#4947);
#2139=LINE('',#44951,#4948);
#2140=LINE('',#44955,#4949);
#2141=LINE('',#44959,#4950);
#2142=LINE('',#44963,#4951);
#2143=LINE('',#44967,#4952);
#2144=LINE('',#44975,#4953);
#2145=LINE('',#44981,#4954);
#2146=LINE('',#44985,#4955);
#2147=LINE('',#45002,#4956);
#2148=LINE('',#45018,#4957);
#2149=LINE('',#45022,#4958);
#2150=LINE('',#45026,#4959);
#2151=LINE('',#45042,#4960);
#2152=LINE('',#45054,#4961);
#2153=LINE('',#45058,#4962);
#2154=LINE('',#45062,#4963);
#2155=LINE('',#45073,#4964);
#2156=LINE('',#45077,#4965);
#2157=LINE('',#45081,#4966);
#2158=LINE('',#45084,#4967);
#2159=LINE('',#45089,#4968);
#2160=LINE('',#45093,#4969);
#2161=LINE('',#45097,#4970);
#2162=LINE('',#45100,#4971);
#2163=LINE('',#45105,#4972);
#2164=LINE('',#45109,#4973);
#2165=LINE('',#45113,#4974);
#2166=LINE('',#45116,#4975);
#2167=LINE('',#45121,#4976);
#2168=LINE('',#45125,#4977);
#2169=LINE('',#45129,#4978);
#2170=LINE('',#45132,#4979);
#2171=LINE('',#45137,#4980);
#2172=LINE('',#45141,#4981);
#2173=LINE('',#45145,#4982);
#2174=LINE('',#45148,#4983);
#2175=LINE('',#45153,#4984);
#2176=LINE('',#45157,#4985);
#2177=LINE('',#45161,#4986);
#2178=LINE('',#45164,#4987);
#2179=LINE('',#45169,#4988);
#2180=LINE('',#45173,#4989);
#2181=LINE('',#45177,#4990);
#2182=LINE('',#45180,#4991);
#2183=LINE('',#45185,#4992);
#2184=LINE('',#45189,#4993);
#2185=LINE('',#45193,#4994);
#2186=LINE('',#45196,#4995);
#2187=LINE('',#45201,#4996);
#2188=LINE('',#45205,#4997);
#2189=LINE('',#45209,#4998);
#2190=LINE('',#45212,#4999);
#2191=LINE('',#45217,#5000);
#2192=LINE('',#45221,#5001);
#2193=LINE('',#45225,#5002);
#2194=LINE('',#45228,#5003);
#2195=LINE('',#45233,#5004);
#2196=LINE('',#45237,#5005);
#2197=LINE('',#45241,#5006);
#2198=LINE('',#45244,#5007);
#2199=LINE('',#45249,#5008);
#2200=LINE('',#45253,#5009);
#2201=LINE('',#45257,#5010);
#2202=LINE('',#45260,#5011);
#2203=LINE('',#45265,#5012);
#2204=LINE('',#45269,#5013);
#2205=LINE('',#45273,#5014);
#2206=LINE('',#45276,#5015);
#2207=LINE('',#45279,#5016);
#2208=LINE('',#45297,#5017);
#2209=LINE('',#45301,#5018);
#2210=LINE('',#45318,#5019);
#2211=LINE('',#45322,#5020);
#2212=LINE('',#45326,#5021);
#2213=LINE('',#45341,#5022);
#2214=LINE('',#45354,#5023);
#2215=LINE('',#45358,#5024);
#2216=LINE('',#45362,#5025);
#2217=LINE('',#45373,#5026);
#2218=LINE('',#45377,#5027);
#2219=LINE('',#45381,#5028);
#2220=LINE('',#45384,#5029);
#2221=LINE('',#45389,#5030);
#2222=LINE('',#45393,#5031);
#2223=LINE('',#45397,#5032);
#2224=LINE('',#45400,#5033);
#2225=LINE('',#45405,#5034);
#2226=LINE('',#45409,#5035);
#2227=LINE('',#45413,#5036);
#2228=LINE('',#45416,#5037);
#2229=LINE('',#45421,#5038);
#2230=LINE('',#45425,#5039);
#2231=LINE('',#45429,#5040);
#2232=LINE('',#45432,#5041);
#2233=LINE('',#45437,#5042);
#2234=LINE('',#45441,#5043);
#2235=LINE('',#45445,#5044);
#2236=LINE('',#45448,#5045);
#2237=LINE('',#45453,#5046);
#2238=LINE('',#45457,#5047);
#2239=LINE('',#45461,#5048);
#2240=LINE('',#45464,#5049);
#2241=LINE('',#45469,#5050);
#2242=LINE('',#45473,#5051);
#2243=LINE('',#45477,#5052);
#2244=LINE('',#45480,#5053);
#2245=LINE('',#45485,#5054);
#2246=LINE('',#45489,#5055);
#2247=LINE('',#45493,#5056);
#2248=LINE('',#45496,#5057);
#2249=LINE('',#45501,#5058);
#2250=LINE('',#45505,#5059);
#2251=LINE('',#45509,#5060);
#2252=LINE('',#45512,#5061);
#2253=LINE('',#45517,#5062);
#2254=LINE('',#45521,#5063);
#2255=LINE('',#45525,#5064);
#2256=LINE('',#45528,#5065);
#2257=LINE('',#45533,#5066);
#2258=LINE('',#45537,#5067);
#2259=LINE('',#45541,#5068);
#2260=LINE('',#45544,#5069);
#2261=LINE('',#45549,#5070);
#2262=LINE('',#45553,#5071);
#2263=LINE('',#45557,#5072);
#2264=LINE('',#45560,#5073);
#2265=LINE('',#45565,#5074);
#2266=LINE('',#45569,#5075);
#2267=LINE('',#45573,#5076);
#2268=LINE('',#45576,#5077);
#2269=LINE('',#45579,#5078);
#2270=LINE('',#45583,#5079);
#2271=LINE('',#45587,#5080);
#2272=LINE('',#45607,#5081);
#2273=LINE('',#45611,#5082);
#2274=LINE('',#45615,#5083);
#2275=LINE('',#45618,#5084);
#2276=LINE('',#45623,#5085);
#2277=LINE('',#45627,#5086);
#2278=LINE('',#45631,#5087);
#2279=LINE('',#45634,#5088);
#2280=LINE('',#45639,#5089);
#2281=LINE('',#45643,#5090);
#2282=LINE('',#45647,#5091);
#2283=LINE('',#45650,#5092);
#2284=LINE('',#45655,#5093);
#2285=LINE('',#45659,#5094);
#2286=LINE('',#45663,#5095);
#2287=LINE('',#45666,#5096);
#2288=LINE('',#45669,#5097);
#2289=LINE('',#45673,#5098);
#2290=LINE('',#45677,#5099);
#2291=LINE('',#45681,#5100);
#2292=LINE('',#45685,#5101);
#2293=LINE('',#45689,#5102);
#2294=LINE('',#45693,#5103);
#2295=LINE('',#45697,#5104);
#2296=LINE('',#45701,#5105);
#2297=LINE('',#45705,#5106);
#2298=LINE('',#45709,#5107);
#2299=LINE('',#45713,#5108);
#2300=LINE('',#45717,#5109);
#2301=LINE('',#45721,#5110);
#2302=LINE('',#45725,#5111);
#2303=LINE('',#45729,#5112);
#2304=LINE('',#45733,#5113);
#2305=LINE('',#45737,#5114);
#2306=LINE('',#45741,#5115);
#2307=LINE('',#45745,#5116);
#2308=LINE('',#45749,#5117);
#2309=LINE('',#45753,#5118);
#2310=LINE('',#45757,#5119);
#2311=LINE('',#45761,#5120);
#2312=LINE('',#45765,#5121);
#2313=LINE('',#45769,#5122);
#2314=LINE('',#45773,#5123);
#2315=LINE('',#45781,#5124);
#2316=LINE('',#45787,#5125);
#2317=LINE('',#45791,#5126);
#2318=LINE('',#45808,#5127);
#2319=LINE('',#45824,#5128);
#2320=LINE('',#45828,#5129);
#2321=LINE('',#45832,#5130);
#2322=LINE('',#45848,#5131);
#2323=LINE('',#45860,#5132);
#2324=LINE('',#45864,#5133);
#2325=LINE('',#45868,#5134);
#2326=LINE('',#45879,#5135);
#2327=LINE('',#45883,#5136);
#2328=LINE('',#45887,#5137);
#2329=LINE('',#45890,#5138);
#2330=LINE('',#45895,#5139);
#2331=LINE('',#45899,#5140);
#2332=LINE('',#45903,#5141);
#2333=LINE('',#45906,#5142);
#2334=LINE('',#45911,#5143);
#2335=LINE('',#45915,#5144);
#2336=LINE('',#45919,#5145);
#2337=LINE('',#45922,#5146);
#2338=LINE('',#45927,#5147);
#2339=LINE('',#45931,#5148);
#2340=LINE('',#45935,#5149);
#2341=LINE('',#45938,#5150);
#2342=LINE('',#45943,#5151);
#2343=LINE('',#45947,#5152);
#2344=LINE('',#45951,#5153);
#2345=LINE('',#45954,#5154);
#2346=LINE('',#45959,#5155);
#2347=LINE('',#45963,#5156);
#2348=LINE('',#45967,#5157);
#2349=LINE('',#45970,#5158);
#2350=LINE('',#45975,#5159);
#2351=LINE('',#45979,#5160);
#2352=LINE('',#45983,#5161);
#2353=LINE('',#45986,#5162);
#2354=LINE('',#45991,#5163);
#2355=LINE('',#45995,#5164);
#2356=LINE('',#45999,#5165);
#2357=LINE('',#46002,#5166);
#2358=LINE('',#46007,#5167);
#2359=LINE('',#46011,#5168);
#2360=LINE('',#46015,#5169);
#2361=LINE('',#46018,#5170);
#2362=LINE('',#46023,#5171);
#2363=LINE('',#46027,#5172);
#2364=LINE('',#46031,#5173);
#2365=LINE('',#46034,#5174);
#2366=LINE('',#46039,#5175);
#2367=LINE('',#46043,#5176);
#2368=LINE('',#46047,#5177);
#2369=LINE('',#46050,#5178);
#2370=LINE('',#46055,#5179);
#2371=LINE('',#46059,#5180);
#2372=LINE('',#46063,#5181);
#2373=LINE('',#46066,#5182);
#2374=LINE('',#46071,#5183);
#2375=LINE('',#46075,#5184);
#2376=LINE('',#46079,#5185);
#2377=LINE('',#46082,#5186);
#2378=LINE('',#46085,#5187);
#2379=LINE('',#46103,#5188);
#2380=LINE('',#46107,#5189);
#2381=LINE('',#46124,#5190);
#2382=LINE('',#46128,#5191);
#2383=LINE('',#46132,#5192);
#2384=LINE('',#46147,#5193);
#2385=LINE('',#46160,#5194);
#2386=LINE('',#46164,#5195);
#2387=LINE('',#46168,#5196);
#2388=LINE('',#46179,#5197);
#2389=LINE('',#46183,#5198);
#2390=LINE('',#46187,#5199);
#2391=LINE('',#46190,#5200);
#2392=LINE('',#46195,#5201);
#2393=LINE('',#46199,#5202);
#2394=LINE('',#46203,#5203);
#2395=LINE('',#46206,#5204);
#2396=LINE('',#46211,#5205);
#2397=LINE('',#46215,#5206);
#2398=LINE('',#46219,#5207);
#2399=LINE('',#46222,#5208);
#2400=LINE('',#46227,#5209);
#2401=LINE('',#46231,#5210);
#2402=LINE('',#46235,#5211);
#2403=LINE('',#46238,#5212);
#2404=LINE('',#46243,#5213);
#2405=LINE('',#46247,#5214);
#2406=LINE('',#46251,#5215);
#2407=LINE('',#46254,#5216);
#2408=LINE('',#46259,#5217);
#2409=LINE('',#46263,#5218);
#2410=LINE('',#46267,#5219);
#2411=LINE('',#46270,#5220);
#2412=LINE('',#46275,#5221);
#2413=LINE('',#46279,#5222);
#2414=LINE('',#46283,#5223);
#2415=LINE('',#46286,#5224);
#2416=LINE('',#46291,#5225);
#2417=LINE('',#46295,#5226);
#2418=LINE('',#46299,#5227);
#2419=LINE('',#46302,#5228);
#2420=LINE('',#46307,#5229);
#2421=LINE('',#46311,#5230);
#2422=LINE('',#46315,#5231);
#2423=LINE('',#46318,#5232);
#2424=LINE('',#46323,#5233);
#2425=LINE('',#46327,#5234);
#2426=LINE('',#46331,#5235);
#2427=LINE('',#46334,#5236);
#2428=LINE('',#46339,#5237);
#2429=LINE('',#46343,#5238);
#2430=LINE('',#46347,#5239);
#2431=LINE('',#46350,#5240);
#2432=LINE('',#46355,#5241);
#2433=LINE('',#46359,#5242);
#2434=LINE('',#46363,#5243);
#2435=LINE('',#46366,#5244);
#2436=LINE('',#46371,#5245);
#2437=LINE('',#46375,#5246);
#2438=LINE('',#46379,#5247);
#2439=LINE('',#46382,#5248);
#2440=LINE('',#46385,#5249);
#2441=LINE('',#46389,#5250);
#2442=LINE('',#46393,#5251);
#2443=LINE('',#46411,#5252);
#2444=LINE('',#46415,#5253);
#2445=LINE('',#46419,#5254);
#2446=LINE('',#46423,#5255);
#2447=LINE('',#46427,#5256);
#2448=LINE('',#46431,#5257);
#2449=LINE('',#46435,#5258);
#2450=LINE('',#46439,#5259);
#2451=LINE('',#46443,#5260);
#2452=LINE('',#46447,#5261);
#2453=LINE('',#46451,#5262);
#2454=LINE('',#46455,#5263);
#2455=LINE('',#46459,#5264);
#2456=LINE('',#46463,#5265);
#2457=LINE('',#46467,#5266);
#2458=LINE('',#46471,#5267);
#2459=LINE('',#46475,#5268);
#2460=LINE('',#46479,#5269);
#2461=LINE('',#46483,#5270);
#2462=LINE('',#46487,#5271);
#2463=LINE('',#46491,#5272);
#2464=LINE('',#46495,#5273);
#2465=LINE('',#46499,#5274);
#2466=LINE('',#46503,#5275);
#2467=LINE('',#46509,#5276);
#2468=LINE('',#46513,#5277);
#2469=LINE('',#46530,#5278);
#2470=LINE('',#46546,#5279);
#2471=LINE('',#46550,#5280);
#2472=LINE('',#46554,#5281);
#2473=LINE('',#46570,#5282);
#2474=LINE('',#46582,#5283);
#2475=LINE('',#46586,#5284);
#2476=LINE('',#46590,#5285);
#2477=LINE('',#46601,#5286);
#2478=LINE('',#46605,#5287);
#2479=LINE('',#46609,#5288);
#2480=LINE('',#46612,#5289);
#2481=LINE('',#46617,#5290);
#2482=LINE('',#46621,#5291);
#2483=LINE('',#46625,#5292);
#2484=LINE('',#46628,#5293);
#2485=LINE('',#46633,#5294);
#2486=LINE('',#46637,#5295);
#2487=LINE('',#46641,#5296);
#2488=LINE('',#46644,#5297);
#2489=LINE('',#46649,#5298);
#2490=LINE('',#46653,#5299);
#2491=LINE('',#46657,#5300);
#2492=LINE('',#46660,#5301);
#2493=LINE('',#46665,#5302);
#2494=LINE('',#46669,#5303);
#2495=LINE('',#46673,#5304);
#2496=LINE('',#46676,#5305);
#2497=LINE('',#46681,#5306);
#2498=LINE('',#46685,#5307);
#2499=LINE('',#46689,#5308);
#2500=LINE('',#46692,#5309);
#2501=LINE('',#46697,#5310);
#2502=LINE('',#46701,#5311);
#2503=LINE('',#46705,#5312);
#2504=LINE('',#46708,#5313);
#2505=LINE('',#46713,#5314);
#2506=LINE('',#46717,#5315);
#2507=LINE('',#46721,#5316);
#2508=LINE('',#46724,#5317);
#2509=LINE('',#46729,#5318);
#2510=LINE('',#46733,#5319);
#2511=LINE('',#46737,#5320);
#2512=LINE('',#46740,#5321);
#2513=LINE('',#46745,#5322);
#2514=LINE('',#46749,#5323);
#2515=LINE('',#46753,#5324);
#2516=LINE('',#46756,#5325);
#2517=LINE('',#46761,#5326);
#2518=LINE('',#46765,#5327);
#2519=LINE('',#46769,#5328);
#2520=LINE('',#46772,#5329);
#2521=LINE('',#46777,#5330);
#2522=LINE('',#46781,#5331);
#2523=LINE('',#46785,#5332);
#2524=LINE('',#46788,#5333);
#2525=LINE('',#46793,#5334);
#2526=LINE('',#46797,#5335);
#2527=LINE('',#46801,#5336);
#2528=LINE('',#46804,#5337);
#2529=LINE('',#46807,#5338);
#2530=LINE('',#46825,#5339);
#2531=LINE('',#46829,#5340);
#2532=LINE('',#46846,#5341);
#2533=LINE('',#46850,#5342);
#2534=LINE('',#46854,#5343);
#2535=LINE('',#46869,#5344);
#2536=LINE('',#46882,#5345);
#2537=LINE('',#46886,#5346);
#2538=LINE('',#46890,#5347);
#2539=LINE('',#46901,#5348);
#2540=LINE('',#46905,#5349);
#2541=LINE('',#46909,#5350);
#2542=LINE('',#46912,#5351);
#2543=LINE('',#46917,#5352);
#2544=LINE('',#46921,#5353);
#2545=LINE('',#46925,#5354);
#2546=LINE('',#46928,#5355);
#2547=LINE('',#46933,#5356);
#2548=LINE('',#46937,#5357);
#2549=LINE('',#46941,#5358);
#2550=LINE('',#46944,#5359);
#2551=LINE('',#46949,#5360);
#2552=LINE('',#46953,#5361);
#2553=LINE('',#46957,#5362);
#2554=LINE('',#46960,#5363);
#2555=LINE('',#46965,#5364);
#2556=LINE('',#46969,#5365);
#2557=LINE('',#46973,#5366);
#2558=LINE('',#46976,#5367);
#2559=LINE('',#46981,#5368);
#2560=LINE('',#46985,#5369);
#2561=LINE('',#46989,#5370);
#2562=LINE('',#46992,#5371);
#2563=LINE('',#46997,#5372);
#2564=LINE('',#47001,#5373);
#2565=LINE('',#47005,#5374);
#2566=LINE('',#47008,#5375);
#2567=LINE('',#47013,#5376);
#2568=LINE('',#47017,#5377);
#2569=LINE('',#47021,#5378);
#2570=LINE('',#47024,#5379);
#2571=LINE('',#47029,#5380);
#2572=LINE('',#47033,#5381);
#2573=LINE('',#47037,#5382);
#2574=LINE('',#47040,#5383);
#2575=LINE('',#47045,#5384);
#2576=LINE('',#47049,#5385);
#2577=LINE('',#47053,#5386);
#2578=LINE('',#47056,#5387);
#2579=LINE('',#47061,#5388);
#2580=LINE('',#47065,#5389);
#2581=LINE('',#47069,#5390);
#2582=LINE('',#47072,#5391);
#2583=LINE('',#47077,#5392);
#2584=LINE('',#47081,#5393);
#2585=LINE('',#47085,#5394);
#2586=LINE('',#47088,#5395);
#2587=LINE('',#47093,#5396);
#2588=LINE('',#47097,#5397);
#2589=LINE('',#47101,#5398);
#2590=LINE('',#47104,#5399);
#2591=LINE('',#47107,#5400);
#2592=LINE('',#47111,#5401);
#2593=LINE('',#47115,#5402);
#2594=LINE('',#47135,#5403);
#2595=LINE('',#47139,#5404);
#2596=LINE('',#47143,#5405);
#2597=LINE('',#47146,#5406);
#2598=LINE('',#47151,#5407);
#2599=LINE('',#47155,#5408);
#2600=LINE('',#47159,#5409);
#2601=LINE('',#47162,#5410);
#2602=LINE('',#47167,#5411);
#2603=LINE('',#47171,#5412);
#2604=LINE('',#47175,#5413);
#2605=LINE('',#47178,#5414);
#2606=LINE('',#47183,#5415);
#2607=LINE('',#47187,#5416);
#2608=LINE('',#47191,#5417);
#2609=LINE('',#47194,#5418);
#2610=LINE('',#47199,#5419);
#2611=LINE('',#47203,#5420);
#2612=LINE('',#47207,#5421);
#2613=LINE('',#47210,#5422);
#2614=LINE('',#47217,#5423);
#2615=LINE('',#47221,#5424);
#2616=LINE('',#47225,#5425);
#2617=LINE('',#47229,#5426);
#2618=LINE('',#47239,#5427);
#2619=LINE('',#47243,#5428);
#2620=LINE('',#47247,#5429);
#2621=LINE('',#47250,#5430);
#2622=LINE('',#47253,#5431);
#2623=LINE('',#47257,#5432);
#2624=LINE('',#47261,#5433);
#2625=LINE('',#47265,#5434);
#2626=LINE('',#47269,#5435);
#2627=LINE('',#47273,#5436);
#2628=LINE('',#47277,#5437);
#2629=LINE('',#47281,#5438);
#2630=LINE('',#47285,#5439);
#2631=LINE('',#47289,#5440);
#2632=LINE('',#47293,#5441);
#2633=LINE('',#47297,#5442);
#2634=LINE('',#47301,#5443);
#2635=LINE('',#47305,#5444);
#2636=LINE('',#47309,#5445);
#2637=LINE('',#47313,#5446);
#2638=LINE('',#47317,#5447);
#2639=LINE('',#47321,#5448);
#2640=LINE('',#47325,#5449);
#2641=LINE('',#47329,#5450);
#2642=LINE('',#47333,#5451);
#2643=LINE('',#47337,#5452);
#2644=LINE('',#47341,#5453);
#2645=LINE('',#47345,#5454);
#2646=LINE('',#47349,#5455);
#2647=LINE('',#47353,#5456);
#2648=LINE('',#47357,#5457);
#2649=LINE('',#47361,#5458);
#2650=LINE('',#47365,#5459);
#2651=LINE('',#47369,#5460);
#2652=LINE('',#47373,#5461);
#2653=LINE('',#47377,#5462);
#2654=LINE('',#47381,#5463);
#2655=LINE('',#47385,#5464);
#2656=LINE('',#47389,#5465);
#2657=LINE('',#47393,#5466);
#2658=LINE('',#47397,#5467);
#2659=LINE('',#47401,#5468);
#2660=LINE('',#47405,#5469);
#2661=LINE('',#47409,#5470);
#2662=LINE('',#47412,#5471);
#2663=LINE('',#47413,#5472);
#2664=LINE('',#47415,#5473);
#2665=LINE('',#47417,#5474);
#2666=LINE('',#47418,#5475);
#2667=LINE('',#47420,#5476);
#2668=LINE('',#47421,#5477);
#2669=LINE('',#47423,#5478);
#2670=LINE('',#47425,#5479);
#2671=LINE('',#47428,#5480);
#2672=LINE('',#47429,#5481);
#2673=LINE('',#47431,#5482);
#2674=LINE('',#47433,#5483);
#2675=LINE('',#47435,#5484);
#2676=LINE('',#47436,#5485);
#2677=LINE('',#47438,#5486);
#2678=LINE('',#47439,#5487);
#2679=LINE('',#47441,#5488);
#2680=LINE('',#47443,#5489);
#2681=LINE('',#47446,#5490);
#2682=LINE('',#47447,#5491);
#2683=LINE('',#47449,#5492);
#2684=LINE('',#47450,#5493);
#2685=LINE('',#47452,#5494);
#2686=LINE('',#47454,#5495);
#2687=LINE('',#47457,#5496);
#2688=LINE('',#47458,#5497);
#2689=LINE('',#47460,#5498);
#2690=LINE('',#47461,#5499);
#2691=LINE('',#47463,#5500);
#2692=LINE('',#47465,#5501);
#2693=LINE('',#47468,#5502);
#2694=LINE('',#47469,#5503);
#2695=LINE('',#47471,#5504);
#2696=LINE('',#47472,#5505);
#2697=LINE('',#47474,#5506);
#2698=LINE('',#47476,#5507);
#2699=LINE('',#47479,#5508);
#2700=LINE('',#47480,#5509);
#2701=LINE('',#47482,#5510);
#2702=LINE('',#47483,#5511);
#2703=LINE('',#47485,#5512);
#2704=LINE('',#47487,#5513);
#2705=LINE('',#47490,#5514);
#2706=LINE('',#47491,#5515);
#2707=LINE('',#47493,#5516);
#2708=LINE('',#47495,#5517);
#2709=LINE('',#47497,#5518);
#2710=LINE('',#47499,#5519);
#2711=LINE('',#47501,#5520);
#2712=LINE('',#47502,#5521);
#2713=LINE('',#47504,#5522);
#2714=LINE('',#47506,#5523);
#2715=LINE('',#47508,#5524);
#2716=LINE('',#47510,#5525);
#2717=LINE('',#47512,#5526);
#2718=LINE('',#47514,#5527);
#2719=LINE('',#47517,#5528);
#2720=LINE('',#47518,#5529);
#2721=LINE('',#47520,#5530);
#2722=LINE('',#47522,#5531);
#2723=LINE('',#47524,#5532);
#2724=LINE('',#47526,#5533);
#2725=LINE('',#47528,#5534);
#2726=LINE('',#47530,#5535);
#2727=LINE('',#47533,#5536);
#2728=LINE('',#47534,#5537);
#2729=LINE('',#47536,#5538);
#2730=LINE('',#47538,#5539);
#2731=LINE('',#47540,#5540);
#2732=LINE('',#47542,#5541);
#2733=LINE('',#47544,#5542);
#2734=LINE('',#47545,#5543);
#2735=LINE('',#47547,#5544);
#2736=LINE('',#47549,#5545);
#2737=LINE('',#47551,#5546);
#2738=LINE('',#47553,#5547);
#2739=LINE('',#47555,#5548);
#2740=LINE('',#47557,#5549);
#2741=LINE('',#47560,#5550);
#2742=LINE('',#47561,#5551);
#2743=LINE('',#47563,#5552);
#2744=LINE('',#47565,#5553);
#2745=LINE('',#47567,#5554);
#2746=LINE('',#47569,#5555);
#2747=LINE('',#47571,#5556);
#2748=LINE('',#47573,#5557);
#2749=LINE('',#47576,#5558);
#2750=LINE('',#47577,#5559);
#2751=LINE('',#47579,#5560);
#2752=LINE('',#47581,#5561);
#2753=LINE('',#47583,#5562);
#2754=LINE('',#47585,#5563);
#2755=LINE('',#47587,#5564);
#2756=LINE('',#47589,#5565);
#2757=LINE('',#47592,#5566);
#2758=LINE('',#47593,#5567);
#2759=LINE('',#47595,#5568);
#2760=LINE('',#47597,#5569);
#2761=LINE('',#47599,#5570);
#2762=LINE('',#47601,#5571);
#2763=LINE('',#47603,#5572);
#2764=LINE('',#47604,#5573);
#2765=LINE('',#47606,#5574);
#2766=LINE('',#47608,#5575);
#2767=LINE('',#47610,#5576);
#2768=LINE('',#47612,#5577);
#2769=LINE('',#47614,#5578);
#2770=LINE('',#47616,#5579);
#2771=LINE('',#47619,#5580);
#2772=LINE('',#47620,#5581);
#2773=LINE('',#47622,#5582);
#2774=LINE('',#47624,#5583);
#2775=LINE('',#47626,#5584);
#2776=LINE('',#47628,#5585);
#2777=LINE('',#47630,#5586);
#2778=LINE('',#47632,#5587);
#2779=LINE('',#47635,#5588);
#2780=LINE('',#47636,#5589);
#2781=LINE('',#47638,#5590);
#2782=LINE('',#47640,#5591);
#2783=LINE('',#47642,#5592);
#2784=LINE('',#47644,#5593);
#2785=LINE('',#47646,#5594);
#2786=LINE('',#47647,#5595);
#2787=LINE('',#47649,#5596);
#2788=LINE('',#47651,#5597);
#2789=LINE('',#47653,#5598);
#2790=LINE('',#47655,#5599);
#2791=LINE('',#47657,#5600);
#2792=LINE('',#47659,#5601);
#2793=LINE('',#47662,#5602);
#2794=LINE('',#47663,#5603);
#2795=LINE('',#47665,#5604);
#2796=LINE('',#47667,#5605);
#2797=LINE('',#47669,#5606);
#2798=LINE('',#47671,#5607);
#2799=LINE('',#47673,#5608);
#2800=LINE('',#47675,#5609);
#2801=LINE('',#47678,#5610);
#2802=LINE('',#47679,#5611);
#2803=LINE('',#47681,#5612);
#2804=LINE('',#47683,#5613);
#2805=LINE('',#47685,#5614);
#2806=LINE('',#47687,#5615);
#2807=LINE('',#47689,#5616);
#2808=LINE('',#47690,#5617);
#2809=LINE('',#47692,#5618);
#2810=LINE('',#47694,#5619);
#2811=LINE('',#47696,#5620);
#2812=LINE('',#47698,#5621);
#2813=LINE('',#47700,#5622);
#2814=LINE('',#47702,#5623);
#2815=LINE('',#47705,#5624);
#2816=LINE('',#47706,#5625);
#2817=LINE('',#47708,#5626);
#2818=LINE('',#47710,#5627);
#2819=LINE('',#47712,#5628);
#2820=LINE('',#47714,#5629);
#2821=LINE('',#47716,#5630);
#2822=LINE('',#47718,#5631);
#2823=LINE('',#47766,#5632);
#2824=LINE('',#47768,#5633);
#2825=LINE('',#47770,#5634);
#2826=LINE('',#47771,#5635);
#2827=LINE('',#47773,#5636);
#2828=LINE('',#47775,#5637);
#2829=LINE('',#47777,#5638);
#2830=LINE('',#47779,#5639);
#2831=LINE('',#47781,#5640);
#2832=LINE('',#47783,#5641);
#2833=LINE('',#47786,#5642);
#2834=LINE('',#47787,#5643);
#2835=LINE('',#47789,#5644);
#2836=LINE('',#47791,#5645);
#2837=LINE('',#47793,#5646);
#2838=LINE('',#47795,#5647);
#2839=LINE('',#47797,#5648);
#2840=LINE('',#47799,#5649);
#2841=LINE('',#47802,#5650);
#2842=LINE('',#47803,#5651);
#2843=LINE('',#47805,#5652);
#2844=LINE('',#47807,#5653);
#2845=LINE('',#47809,#5654);
#2846=LINE('',#47811,#5655);
#2847=LINE('',#47813,#5656);
#2848=LINE('',#47814,#5657);
#2849=LINE('',#47816,#5658);
#2850=LINE('',#47818,#5659);
#2851=LINE('',#47820,#5660);
#2852=LINE('',#47822,#5661);
#2853=LINE('',#47824,#5662);
#2854=LINE('',#47825,#5663);
#2855=LINE('',#47827,#5664);
#2856=LINE('',#47829,#5665);
#2857=LINE('',#47831,#5666);
#2858=LINE('',#47833,#5667);
#2859=LINE('',#47834,#5668);
#2860=LINE('',#47836,#5669);
#2861=LINE('',#47837,#5670);
#2862=LINE('',#47840,#5671);
#2863=LINE('',#47841,#5672);
#2864=LINE('',#47843,#5673);
#2865=LINE('',#47844,#5674);
#2866=LINE('',#47846,#5675);
#2867=LINE('',#47847,#5676);
#2868=LINE('',#47948,#5677);
#2869=LINE('',#47950,#5678);
#2870=LINE('',#47952,#5679);
#2871=LINE('',#47955,#5680);
#2872=LINE('',#47962,#5681);
#2873=LINE('',#47964,#5682);
#2874=LINE('',#47967,#5683);
#2875=LINE('',#47969,#5684);
#2876=LINE('',#47972,#5685);
#2877=LINE('',#47974,#5686);
#2878=LINE('',#47977,#5687);
#2879=LINE('',#47979,#5688);
#2880=LINE('',#47982,#5689);
#2881=LINE('',#47984,#5690);
#2882=LINE('',#47987,#5691);
#2883=LINE('',#47988,#5692);
#2884=LINE('',#47990,#5693);
#2885=LINE('',#47992,#5694);
#2886=LINE('',#47994,#5695);
#2887=LINE('',#47996,#5696);
#2888=LINE('',#47998,#5697);
#2889=LINE('',#47999,#5698);
#2890=LINE('',#48001,#5699);
#2891=LINE('',#48003,#5700);
#2892=LINE('',#48005,#5701);
#2893=LINE('',#48007,#5702);
#2894=LINE('',#48009,#5703);
#2895=LINE('',#48011,#5704);
#2896=LINE('',#48014,#5705);
#2897=LINE('',#48015,#5706);
#2898=LINE('',#48017,#5707);
#2899=LINE('',#48019,#5708);
#2900=LINE('',#48021,#5709);
#2901=LINE('',#48023,#5710);
#2902=LINE('',#48025,#5711);
#2903=LINE('',#48027,#5712);
#2904=LINE('',#48030,#5713);
#2905=LINE('',#48031,#5714);
#2906=LINE('',#48033,#5715);
#2907=LINE('',#48035,#5716);
#2908=LINE('',#48037,#5717);
#2909=LINE('',#48039,#5718);
#2910=LINE('',#48041,#5719);
#2911=LINE('',#48042,#5720);
#2912=LINE('',#48044,#5721);
#2913=LINE('',#48046,#5722);
#2914=LINE('',#48048,#5723);
#2915=LINE('',#48050,#5724);
#2916=LINE('',#48052,#5725);
#2917=LINE('',#48054,#5726);
#2918=LINE('',#48057,#5727);
#2919=LINE('',#48058,#5728);
#2920=LINE('',#48060,#5729);
#2921=LINE('',#48062,#5730);
#2922=LINE('',#48064,#5731);
#2923=LINE('',#48066,#5732);
#2924=LINE('',#48068,#5733);
#2925=LINE('',#48070,#5734);
#2926=LINE('',#48073,#5735);
#2927=LINE('',#48074,#5736);
#2928=LINE('',#48076,#5737);
#2929=LINE('',#48078,#5738);
#2930=LINE('',#48080,#5739);
#2931=LINE('',#48082,#5740);
#2932=LINE('',#48084,#5741);
#2933=LINE('',#48086,#5742);
#2934=LINE('',#48089,#5743);
#2935=LINE('',#48090,#5744);
#2936=LINE('',#48092,#5745);
#2937=LINE('',#48094,#5746);
#2938=LINE('',#48096,#5747);
#2939=LINE('',#48098,#5748);
#2940=LINE('',#48100,#5749);
#2941=LINE('',#48101,#5750);
#2942=LINE('',#48103,#5751);
#2943=LINE('',#48105,#5752);
#2944=LINE('',#48107,#5753);
#2945=LINE('',#48109,#5754);
#2946=LINE('',#48111,#5755);
#2947=LINE('',#48113,#5756);
#2948=LINE('',#48116,#5757);
#2949=LINE('',#48117,#5758);
#2950=LINE('',#48119,#5759);
#2951=LINE('',#48121,#5760);
#2952=LINE('',#48123,#5761);
#2953=LINE('',#48125,#5762);
#2954=LINE('',#48127,#5763);
#2955=LINE('',#48129,#5764);
#2956=LINE('',#48132,#5765);
#2957=LINE('',#48133,#5766);
#2958=LINE('',#48135,#5767);
#2959=LINE('',#48137,#5768);
#2960=LINE('',#48139,#5769);
#2961=LINE('',#48141,#5770);
#2962=LINE('',#48143,#5771);
#2963=LINE('',#48144,#5772);
#2964=LINE('',#48146,#5773);
#2965=LINE('',#48148,#5774);
#2966=LINE('',#48150,#5775);
#2967=LINE('',#48152,#5776);
#2968=LINE('',#48154,#5777);
#2969=LINE('',#48156,#5778);
#2970=LINE('',#48159,#5779);
#2971=LINE('',#48160,#5780);
#2972=LINE('',#48162,#5781);
#2973=LINE('',#48164,#5782);
#2974=LINE('',#48166,#5783);
#2975=LINE('',#48168,#5784);
#2976=LINE('',#48170,#5785);
#2977=LINE('',#48172,#5786);
#2978=LINE('',#48175,#5787);
#2979=LINE('',#48176,#5788);
#2980=LINE('',#48178,#5789);
#2981=LINE('',#48180,#5790);
#2982=LINE('',#48182,#5791);
#2983=LINE('',#48184,#5792);
#2984=LINE('',#48186,#5793);
#2985=LINE('',#48187,#5794);
#2986=LINE('',#48189,#5795);
#2987=LINE('',#48191,#5796);
#2988=LINE('',#48193,#5797);
#2989=LINE('',#48195,#5798);
#2990=LINE('',#48197,#5799);
#2991=LINE('',#48199,#5800);
#2992=LINE('',#48202,#5801);
#2993=LINE('',#48203,#5802);
#2994=LINE('',#48205,#5803);
#2995=LINE('',#48207,#5804);
#2996=LINE('',#48209,#5805);
#2997=LINE('',#48211,#5806);
#2998=LINE('',#48213,#5807);
#2999=LINE('',#48215,#5808);
#3000=LINE('',#48263,#5809);
#3001=LINE('',#48265,#5810);
#3002=LINE('',#48267,#5811);
#3003=LINE('',#48268,#5812);
#3004=LINE('',#48270,#5813);
#3005=LINE('',#48272,#5814);
#3006=LINE('',#48274,#5815);
#3007=LINE('',#48276,#5816);
#3008=LINE('',#48278,#5817);
#3009=LINE('',#48280,#5818);
#3010=LINE('',#48283,#5819);
#3011=LINE('',#48284,#5820);
#3012=LINE('',#48286,#5821);
#3013=LINE('',#48288,#5822);
#3014=LINE('',#48290,#5823);
#3015=LINE('',#48292,#5824);
#3016=LINE('',#48294,#5825);
#3017=LINE('',#48296,#5826);
#3018=LINE('',#48299,#5827);
#3019=LINE('',#48300,#5828);
#3020=LINE('',#48302,#5829);
#3021=LINE('',#48304,#5830);
#3022=LINE('',#48306,#5831);
#3023=LINE('',#48308,#5832);
#3024=LINE('',#48310,#5833);
#3025=LINE('',#48311,#5834);
#3026=LINE('',#48313,#5835);
#3027=LINE('',#48315,#5836);
#3028=LINE('',#48317,#5837);
#3029=LINE('',#48319,#5838);
#3030=LINE('',#48321,#5839);
#3031=LINE('',#48322,#5840);
#3032=LINE('',#48324,#5841);
#3033=LINE('',#48326,#5842);
#3034=LINE('',#48328,#5843);
#3035=LINE('',#48330,#5844);
#3036=LINE('',#48331,#5845);
#3037=LINE('',#48333,#5846);
#3038=LINE('',#48334,#5847);
#3039=LINE('',#48337,#5848);
#3040=LINE('',#48338,#5849);
#3041=LINE('',#48340,#5850);
#3042=LINE('',#48341,#5851);
#3043=LINE('',#48439,#5852);
#3044=LINE('',#48441,#5853);
#3045=LINE('',#48442,#5854);
#3046=LINE('',#48444,#5855);
#3047=LINE('',#48445,#5856);
#3048=LINE('',#48447,#5857);
#3049=LINE('',#48449,#5858);
#3050=LINE('',#48452,#5859);
#3051=LINE('',#48453,#5860);
#3052=LINE('',#48455,#5861);
#3053=LINE('',#48457,#5862);
#3054=LINE('',#48459,#5863);
#3055=LINE('',#48460,#5864);
#3056=LINE('',#48462,#5865);
#3057=LINE('',#48463,#5866);
#3058=LINE('',#48465,#5867);
#3059=LINE('',#48467,#5868);
#3060=LINE('',#48470,#5869);
#3061=LINE('',#48471,#5870);
#3062=LINE('',#48473,#5871);
#3063=LINE('',#48474,#5872);
#3064=LINE('',#48476,#5873);
#3065=LINE('',#48478,#5874);
#3066=LINE('',#48481,#5875);
#3067=LINE('',#48482,#5876);
#3068=LINE('',#48484,#5877);
#3069=LINE('',#48485,#5878);
#3070=LINE('',#48487,#5879);
#3071=LINE('',#48489,#5880);
#3072=LINE('',#48492,#5881);
#3073=LINE('',#48493,#5882);
#3074=LINE('',#48495,#5883);
#3075=LINE('',#48496,#5884);
#3076=LINE('',#48498,#5885);
#3077=LINE('',#48500,#5886);
#3078=LINE('',#48503,#5887);
#3079=LINE('',#48504,#5888);
#3080=LINE('',#48506,#5889);
#3081=LINE('',#48507,#5890);
#3082=LINE('',#48509,#5891);
#3083=LINE('',#48511,#5892);
#3084=LINE('',#48514,#5893);
#3085=LINE('',#48516,#5894);
#3086=LINE('',#48519,#5895);
#3087=LINE('',#48520,#5896);
#3088=LINE('',#48522,#5897);
#3089=LINE('',#48524,#5898);
#3090=LINE('',#48526,#5899);
#3091=LINE('',#48528,#5900);
#3092=LINE('',#48530,#5901);
#3093=LINE('',#48532,#5902);
#3094=LINE('',#48535,#5903);
#3095=LINE('',#48536,#5904);
#3096=LINE('',#48538,#5905);
#3097=LINE('',#48540,#5906);
#3098=LINE('',#48542,#5907);
#3099=LINE('',#48544,#5908);
#3100=LINE('',#48546,#5909);
#3101=LINE('',#48548,#5910);
#3102=LINE('',#48551,#5911);
#3103=LINE('',#48552,#5912);
#3104=LINE('',#48554,#5913);
#3105=LINE('',#48556,#5914);
#3106=LINE('',#48558,#5915);
#3107=LINE('',#48560,#5916);
#3108=LINE('',#48562,#5917);
#3109=LINE('',#48563,#5918);
#3110=LINE('',#48565,#5919);
#3111=LINE('',#48567,#5920);
#3112=LINE('',#48569,#5921);
#3113=LINE('',#48571,#5922);
#3114=LINE('',#48573,#5923);
#3115=LINE('',#48575,#5924);
#3116=LINE('',#48578,#5925);
#3117=LINE('',#48579,#5926);
#3118=LINE('',#48581,#5927);
#3119=LINE('',#48583,#5928);
#3120=LINE('',#48585,#5929);
#3121=LINE('',#48587,#5930);
#3122=LINE('',#48589,#5931);
#3123=LINE('',#48591,#5932);
#3124=LINE('',#48594,#5933);
#3125=LINE('',#48595,#5934);
#3126=LINE('',#48597,#5935);
#3127=LINE('',#48599,#5936);
#3128=LINE('',#48601,#5937);
#3129=LINE('',#48603,#5938);
#3130=LINE('',#48605,#5939);
#3131=LINE('',#48607,#5940);
#3132=LINE('',#48610,#5941);
#3133=LINE('',#48612,#5942);
#3134=LINE('',#48615,#5943);
#3135=LINE('',#48616,#5944);
#3136=LINE('',#48618,#5945);
#3137=LINE('',#48620,#5946);
#3138=LINE('',#48622,#5947);
#3139=LINE('',#48624,#5948);
#3140=LINE('',#48626,#5949);
#3141=LINE('',#48628,#5950);
#3142=LINE('',#48631,#5951);
#3143=LINE('',#48632,#5952);
#3144=LINE('',#48634,#5953);
#3145=LINE('',#48636,#5954);
#3146=LINE('',#48638,#5955);
#3147=LINE('',#48640,#5956);
#3148=LINE('',#48642,#5957);
#3149=LINE('',#48644,#5958);
#3150=LINE('',#48647,#5959);
#3151=LINE('',#48648,#5960);
#3152=LINE('',#48650,#5961);
#3153=LINE('',#48652,#5962);
#3154=LINE('',#48654,#5963);
#3155=LINE('',#48656,#5964);
#3156=LINE('',#48658,#5965);
#3157=LINE('',#48659,#5966);
#3158=LINE('',#48661,#5967);
#3159=LINE('',#48663,#5968);
#3160=LINE('',#48665,#5969);
#3161=LINE('',#48667,#5970);
#3162=LINE('',#48669,#5971);
#3163=LINE('',#48671,#5972);
#3164=LINE('',#48674,#5973);
#3165=LINE('',#48675,#5974);
#3166=LINE('',#48677,#5975);
#3167=LINE('',#48679,#5976);
#3168=LINE('',#48681,#5977);
#3169=LINE('',#48683,#5978);
#3170=LINE('',#48685,#5979);
#3171=LINE('',#48687,#5980);
#3172=LINE('',#48690,#5981);
#3173=LINE('',#48692,#5982);
#3174=LINE('',#48695,#5983);
#3175=LINE('',#48696,#5984);
#3176=LINE('',#48698,#5985);
#3177=LINE('',#48700,#5986);
#3178=LINE('',#48702,#5987);
#3179=LINE('',#48704,#5988);
#3180=LINE('',#48706,#5989);
#3181=LINE('',#48708,#5990);
#3182=LINE('',#48711,#5991);
#3183=LINE('',#48712,#5992);
#3184=LINE('',#48714,#5993);
#3185=LINE('',#48716,#5994);
#3186=LINE('',#48718,#5995);
#3187=LINE('',#48720,#5996);
#3188=LINE('',#48722,#5997);
#3189=LINE('',#48724,#5998);
#3190=LINE('',#48772,#5999);
#3191=LINE('',#48774,#6000);
#3192=LINE('',#48776,#6001);
#3193=LINE('',#48777,#6002);
#3194=LINE('',#48779,#6003);
#3195=LINE('',#48781,#6004);
#3196=LINE('',#48783,#6005);
#3197=LINE('',#48785,#6006);
#3198=LINE('',#48787,#6007);
#3199=LINE('',#48789,#6008);
#3200=LINE('',#48792,#6009);
#3201=LINE('',#48793,#6010);
#3202=LINE('',#48795,#6011);
#3203=LINE('',#48797,#6012);
#3204=LINE('',#48799,#6013);
#3205=LINE('',#48801,#6014);
#3206=LINE('',#48803,#6015);
#3207=LINE('',#48805,#6016);
#3208=LINE('',#48808,#6017);
#3209=LINE('',#48809,#6018);
#3210=LINE('',#48811,#6019);
#3211=LINE('',#48813,#6020);
#3212=LINE('',#48815,#6021);
#3213=LINE('',#48817,#6022);
#3214=LINE('',#48819,#6023);
#3215=LINE('',#48821,#6024);
#3216=LINE('',#48824,#6025);
#3217=LINE('',#48825,#6026);
#3218=LINE('',#48827,#6027);
#3219=LINE('',#48830,#6028);
#3220=LINE('',#48831,#6029);
#3221=LINE('',#48834,#6030);
#3222=LINE('',#48835,#6031);
#3223=LINE('',#48837,#6032);
#3224=LINE('',#48838,#6033);
#3225=LINE('',#48840,#6034);
#3226=LINE('',#48841,#6035);
#3227=LINE('',#48939,#6036);
#3228=LINE('',#48941,#6037);
#3229=LINE('',#48943,#6038);
#3230=LINE('',#48946,#6039);
#3231=LINE('',#48953,#6040);
#3232=LINE('',#48955,#6041);
#3233=LINE('',#48958,#6042);
#3234=LINE('',#48960,#6043);
#3235=LINE('',#48963,#6044);
#3236=LINE('',#48965,#6045);
#3237=LINE('',#48968,#6046);
#3238=LINE('',#48970,#6047);
#3239=LINE('',#48973,#6048);
#3240=LINE('',#48975,#6049);
#3241=LINE('',#48978,#6050);
#3242=LINE('',#48979,#6051);
#3243=LINE('',#48981,#6052);
#3244=LINE('',#48983,#6053);
#3245=LINE('',#48985,#6054);
#3246=LINE('',#48987,#6055);
#3247=LINE('',#48989,#6056);
#3248=LINE('',#48990,#6057);
#3249=LINE('',#48992,#6058);
#3250=LINE('',#48994,#6059);
#3251=LINE('',#48996,#6060);
#3252=LINE('',#48998,#6061);
#3253=LINE('',#49000,#6062);
#3254=LINE('',#49002,#6063);
#3255=LINE('',#49005,#6064);
#3256=LINE('',#49006,#6065);
#3257=LINE('',#49008,#6066);
#3258=LINE('',#49010,#6067);
#3259=LINE('',#49012,#6068);
#3260=LINE('',#49014,#6069);
#3261=LINE('',#49016,#6070);
#3262=LINE('',#49018,#6071);
#3263=LINE('',#49021,#6072);
#3264=LINE('',#49022,#6073);
#3265=LINE('',#49024,#6074);
#3266=LINE('',#49026,#6075);
#3267=LINE('',#49028,#6076);
#3268=LINE('',#49030,#6077);
#3269=LINE('',#49032,#6078);
#3270=LINE('',#49033,#6079);
#3271=LINE('',#49035,#6080);
#3272=LINE('',#49037,#6081);
#3273=LINE('',#49039,#6082);
#3274=LINE('',#49041,#6083);
#3275=LINE('',#49043,#6084);
#3276=LINE('',#49045,#6085);
#3277=LINE('',#49048,#6086);
#3278=LINE('',#49049,#6087);
#3279=LINE('',#49051,#6088);
#3280=LINE('',#49053,#6089);
#3281=LINE('',#49055,#6090);
#3282=LINE('',#49057,#6091);
#3283=LINE('',#49059,#6092);
#3284=LINE('',#49061,#6093);
#3285=LINE('',#49064,#6094);
#3286=LINE('',#49065,#6095);
#3287=LINE('',#49067,#6096);
#3288=LINE('',#49069,#6097);
#3289=LINE('',#49071,#6098);
#3290=LINE('',#49073,#6099);
#3291=LINE('',#49075,#6100);
#3292=LINE('',#49077,#6101);
#3293=LINE('',#49080,#6102);
#3294=LINE('',#49081,#6103);
#3295=LINE('',#49083,#6104);
#3296=LINE('',#49085,#6105);
#3297=LINE('',#49087,#6106);
#3298=LINE('',#49089,#6107);
#3299=LINE('',#49091,#6108);
#3300=LINE('',#49092,#6109);
#3301=LINE('',#49094,#6110);
#3302=LINE('',#49096,#6111);
#3303=LINE('',#49098,#6112);
#3304=LINE('',#49100,#6113);
#3305=LINE('',#49102,#6114);
#3306=LINE('',#49104,#6115);
#3307=LINE('',#49107,#6116);
#3308=LINE('',#49108,#6117);
#3309=LINE('',#49110,#6118);
#3310=LINE('',#49112,#6119);
#3311=LINE('',#49114,#6120);
#3312=LINE('',#49116,#6121);
#3313=LINE('',#49118,#6122);
#3314=LINE('',#49120,#6123);
#3315=LINE('',#49123,#6124);
#3316=LINE('',#49124,#6125);
#3317=LINE('',#49126,#6126);
#3318=LINE('',#49128,#6127);
#3319=LINE('',#49130,#6128);
#3320=LINE('',#49132,#6129);
#3321=LINE('',#49134,#6130);
#3322=LINE('',#49135,#6131);
#3323=LINE('',#49137,#6132);
#3324=LINE('',#49139,#6133);
#3325=LINE('',#49141,#6134);
#3326=LINE('',#49143,#6135);
#3327=LINE('',#49145,#6136);
#3328=LINE('',#49147,#6137);
#3329=LINE('',#49150,#6138);
#3330=LINE('',#49151,#6139);
#3331=LINE('',#49153,#6140);
#3332=LINE('',#49155,#6141);
#3333=LINE('',#49157,#6142);
#3334=LINE('',#49159,#6143);
#3335=LINE('',#49161,#6144);
#3336=LINE('',#49163,#6145);
#3337=LINE('',#49166,#6146);
#3338=LINE('',#49167,#6147);
#3339=LINE('',#49169,#6148);
#3340=LINE('',#49171,#6149);
#3341=LINE('',#49173,#6150);
#3342=LINE('',#49175,#6151);
#3343=LINE('',#49177,#6152);
#3344=LINE('',#49178,#6153);
#3345=LINE('',#49180,#6154);
#3346=LINE('',#49182,#6155);
#3347=LINE('',#49184,#6156);
#3348=LINE('',#49186,#6157);
#3349=LINE('',#49188,#6158);
#3350=LINE('',#49190,#6159);
#3351=LINE('',#49193,#6160);
#3352=LINE('',#49194,#6161);
#3353=LINE('',#49196,#6162);
#3354=LINE('',#49198,#6163);
#3355=LINE('',#49200,#6164);
#3356=LINE('',#49202,#6165);
#3357=LINE('',#49204,#6166);
#3358=LINE('',#49206,#6167);
#3359=LINE('',#49254,#6168);
#3360=LINE('',#49256,#6169);
#3361=LINE('',#49258,#6170);
#3362=LINE('',#49259,#6171);
#3363=LINE('',#49261,#6172);
#3364=LINE('',#49263,#6173);
#3365=LINE('',#49265,#6174);
#3366=LINE('',#49267,#6175);
#3367=LINE('',#49269,#6176);
#3368=LINE('',#49271,#6177);
#3369=LINE('',#49274,#6178);
#3370=LINE('',#49275,#6179);
#3371=LINE('',#49277,#6180);
#3372=LINE('',#49279,#6181);
#3373=LINE('',#49281,#6182);
#3374=LINE('',#49283,#6183);
#3375=LINE('',#49285,#6184);
#3376=LINE('',#49287,#6185);
#3377=LINE('',#49290,#6186);
#3378=LINE('',#49291,#6187);
#3379=LINE('',#49293,#6188);
#3380=LINE('',#49295,#6189);
#3381=LINE('',#49297,#6190);
#3382=LINE('',#49299,#6191);
#3383=LINE('',#49301,#6192);
#3384=LINE('',#49302,#6193);
#3385=LINE('',#49304,#6194);
#3386=LINE('',#49306,#6195);
#3387=LINE('',#49308,#6196);
#3388=LINE('',#49310,#6197);
#3389=LINE('',#49312,#6198);
#3390=LINE('',#49313,#6199);
#3391=LINE('',#49315,#6200);
#3392=LINE('',#49317,#6201);
#3393=LINE('',#49319,#6202);
#3394=LINE('',#49321,#6203);
#3395=LINE('',#49322,#6204);
#3396=LINE('',#49324,#6205);
#3397=LINE('',#49325,#6206);
#3398=LINE('',#49328,#6207);
#3399=LINE('',#49329,#6208);
#3400=LINE('',#49331,#6209);
#3401=LINE('',#49332,#6210);
#3402=LINE('',#49430,#6211);
#3403=LINE('',#49432,#6212);
#3404=LINE('',#49433,#6213);
#3405=LINE('',#49435,#6214);
#3406=LINE('',#49436,#6215);
#3407=LINE('',#49438,#6216);
#3408=LINE('',#49440,#6217);
#3409=LINE('',#49443,#6218);
#3410=LINE('',#49444,#6219);
#3411=LINE('',#49446,#6220);
#3412=LINE('',#49448,#6221);
#3413=LINE('',#49450,#6222);
#3414=LINE('',#49451,#6223);
#3415=LINE('',#49453,#6224);
#3416=LINE('',#49454,#6225);
#3417=LINE('',#49456,#6226);
#3418=LINE('',#49458,#6227);
#3419=LINE('',#49461,#6228);
#3420=LINE('',#49462,#6229);
#3421=LINE('',#49464,#6230);
#3422=LINE('',#49465,#6231);
#3423=LINE('',#49467,#6232);
#3424=LINE('',#49469,#6233);
#3425=LINE('',#49472,#6234);
#3426=LINE('',#49473,#6235);
#3427=LINE('',#49475,#6236);
#3428=LINE('',#49476,#6237);
#3429=LINE('',#49478,#6238);
#3430=LINE('',#49480,#6239);
#3431=LINE('',#49483,#6240);
#3432=LINE('',#49484,#6241);
#3433=LINE('',#49486,#6242);
#3434=LINE('',#49487,#6243);
#3435=LINE('',#49489,#6244);
#3436=LINE('',#49491,#6245);
#3437=LINE('',#49494,#6246);
#3438=LINE('',#49495,#6247);
#3439=LINE('',#49497,#6248);
#3440=LINE('',#49498,#6249);
#3441=LINE('',#49500,#6250);
#3442=LINE('',#49502,#6251);
#3443=LINE('',#49505,#6252);
#3444=LINE('',#49507,#6253);
#3445=LINE('',#49510,#6254);
#3446=LINE('',#49511,#6255);
#3447=LINE('',#49513,#6256);
#3448=LINE('',#49515,#6257);
#3449=LINE('',#49517,#6258);
#3450=LINE('',#49519,#6259);
#3451=LINE('',#49521,#6260);
#3452=LINE('',#49523,#6261);
#3453=LINE('',#49526,#6262);
#3454=LINE('',#49527,#6263);
#3455=LINE('',#49529,#6264);
#3456=LINE('',#49531,#6265);
#3457=LINE('',#49533,#6266);
#3458=LINE('',#49535,#6267);
#3459=LINE('',#49537,#6268);
#3460=LINE('',#49539,#6269);
#3461=LINE('',#49542,#6270);
#3462=LINE('',#49543,#6271);
#3463=LINE('',#49545,#6272);
#3464=LINE('',#49547,#6273);
#3465=LINE('',#49549,#6274);
#3466=LINE('',#49551,#6275);
#3467=LINE('',#49553,#6276);
#3468=LINE('',#49554,#6277);
#3469=LINE('',#49556,#6278);
#3470=LINE('',#49558,#6279);
#3471=LINE('',#49560,#6280);
#3472=LINE('',#49562,#6281);
#3473=LINE('',#49564,#6282);
#3474=LINE('',#49566,#6283);
#3475=LINE('',#49569,#6284);
#3476=LINE('',#49570,#6285);
#3477=LINE('',#49572,#6286);
#3478=LINE('',#49574,#6287);
#3479=LINE('',#49576,#6288);
#3480=LINE('',#49578,#6289);
#3481=LINE('',#49580,#6290);
#3482=LINE('',#49582,#6291);
#3483=LINE('',#49585,#6292);
#3484=LINE('',#49586,#6293);
#3485=LINE('',#49588,#6294);
#3486=LINE('',#49590,#6295);
#3487=LINE('',#49592,#6296);
#3488=LINE('',#49594,#6297);
#3489=LINE('',#49596,#6298);
#3490=LINE('',#49598,#6299);
#3491=LINE('',#49601,#6300);
#3492=LINE('',#49603,#6301);
#3493=LINE('',#49606,#6302);
#3494=LINE('',#49607,#6303);
#3495=LINE('',#49609,#6304);
#3496=LINE('',#49611,#6305);
#3497=LINE('',#49613,#6306);
#3498=LINE('',#49615,#6307);
#3499=LINE('',#49617,#6308);
#3500=LINE('',#49619,#6309);
#3501=LINE('',#49622,#6310);
#3502=LINE('',#49623,#6311);
#3503=LINE('',#49625,#6312);
#3504=LINE('',#49627,#6313);
#3505=LINE('',#49629,#6314);
#3506=LINE('',#49631,#6315);
#3507=LINE('',#49633,#6316);
#3508=LINE('',#49635,#6317);
#3509=LINE('',#49638,#6318);
#3510=LINE('',#49639,#6319);
#3511=LINE('',#49641,#6320);
#3512=LINE('',#49643,#6321);
#3513=LINE('',#49645,#6322);
#3514=LINE('',#49647,#6323);
#3515=LINE('',#49649,#6324);
#3516=LINE('',#49650,#6325);
#3517=LINE('',#49652,#6326);
#3518=LINE('',#49654,#6327);
#3519=LINE('',#49656,#6328);
#3520=LINE('',#49658,#6329);
#3521=LINE('',#49660,#6330);
#3522=LINE('',#49662,#6331);
#3523=LINE('',#49665,#6332);
#3524=LINE('',#49666,#6333);
#3525=LINE('',#49668,#6334);
#3526=LINE('',#49670,#6335);
#3527=LINE('',#49672,#6336);
#3528=LINE('',#49674,#6337);
#3529=LINE('',#49676,#6338);
#3530=LINE('',#49678,#6339);
#3531=LINE('',#49681,#6340);
#3532=LINE('',#49683,#6341);
#3533=LINE('',#49686,#6342);
#3534=LINE('',#49687,#6343);
#3535=LINE('',#49689,#6344);
#3536=LINE('',#49691,#6345);
#3537=LINE('',#49693,#6346);
#3538=LINE('',#49695,#6347);
#3539=LINE('',#49697,#6348);
#3540=LINE('',#49699,#6349);
#3541=LINE('',#49702,#6350);
#3542=LINE('',#49703,#6351);
#3543=LINE('',#49705,#6352);
#3544=LINE('',#49707,#6353);
#3545=LINE('',#49709,#6354);
#3546=LINE('',#49711,#6355);
#3547=LINE('',#49713,#6356);
#3548=LINE('',#49715,#6357);
#3549=LINE('',#49763,#6358);
#3550=LINE('',#49765,#6359);
#3551=LINE('',#49767,#6360);
#3552=LINE('',#49768,#6361);
#3553=LINE('',#49770,#6362);
#3554=LINE('',#49772,#6363);
#3555=LINE('',#49774,#6364);
#3556=LINE('',#49776,#6365);
#3557=LINE('',#49778,#6366);
#3558=LINE('',#49780,#6367);
#3559=LINE('',#49783,#6368);
#3560=LINE('',#49784,#6369);
#3561=LINE('',#49786,#6370);
#3562=LINE('',#49788,#6371);
#3563=LINE('',#49790,#6372);
#3564=LINE('',#49792,#6373);
#3565=LINE('',#49794,#6374);
#3566=LINE('',#49796,#6375);
#3567=LINE('',#49799,#6376);
#3568=LINE('',#49800,#6377);
#3569=LINE('',#49802,#6378);
#3570=LINE('',#49804,#6379);
#3571=LINE('',#49806,#6380);
#3572=LINE('',#49808,#6381);
#3573=LINE('',#49810,#6382);
#3574=LINE('',#49812,#6383);
#3575=LINE('',#49815,#6384);
#3576=LINE('',#49816,#6385);
#3577=LINE('',#49818,#6386);
#3578=LINE('',#49821,#6387);
#3579=LINE('',#49822,#6388);
#3580=LINE('',#49825,#6389);
#3581=LINE('',#49826,#6390);
#3582=LINE('',#49828,#6391);
#3583=LINE('',#49829,#6392);
#3584=LINE('',#49831,#6393);
#3585=LINE('',#49832,#6394);
#3586=LINE('',#49930,#6395);
#3587=LINE('',#49932,#6396);
#3588=LINE('',#49934,#6397);
#3589=LINE('',#49937,#6398);
#3590=LINE('',#49944,#6399);
#3591=LINE('',#49946,#6400);
#3592=LINE('',#49949,#6401);
#3593=LINE('',#49951,#6402);
#3594=LINE('',#49954,#6403);
#3595=LINE('',#49956,#6404);
#3596=LINE('',#49959,#6405);
#3597=LINE('',#49961,#6406);
#3598=LINE('',#49964,#6407);
#3599=LINE('',#49966,#6408);
#3600=LINE('',#49969,#6409);
#3601=LINE('',#49970,#6410);
#3602=LINE('',#49972,#6411);
#3603=LINE('',#49974,#6412);
#3604=LINE('',#49976,#6413);
#3605=LINE('',#49978,#6414);
#3606=LINE('',#49980,#6415);
#3607=LINE('',#49981,#6416);
#3608=LINE('',#49983,#6417);
#3609=LINE('',#49985,#6418);
#3610=LINE('',#49987,#6419);
#3611=LINE('',#49989,#6420);
#3612=LINE('',#49991,#6421);
#3613=LINE('',#49993,#6422);
#3614=LINE('',#49996,#6423);
#3615=LINE('',#49997,#6424);
#3616=LINE('',#49999,#6425);
#3617=LINE('',#50001,#6426);
#3618=LINE('',#50003,#6427);
#3619=LINE('',#50005,#6428);
#3620=LINE('',#50007,#6429);
#3621=LINE('',#50009,#6430);
#3622=LINE('',#50012,#6431);
#3623=LINE('',#50013,#6432);
#3624=LINE('',#50015,#6433);
#3625=LINE('',#50017,#6434);
#3626=LINE('',#50019,#6435);
#3627=LINE('',#50021,#6436);
#3628=LINE('',#50023,#6437);
#3629=LINE('',#50024,#6438);
#3630=LINE('',#50026,#6439);
#3631=LINE('',#50028,#6440);
#3632=LINE('',#50030,#6441);
#3633=LINE('',#50032,#6442);
#3634=LINE('',#50034,#6443);
#3635=LINE('',#50036,#6444);
#3636=LINE('',#50039,#6445);
#3637=LINE('',#50040,#6446);
#3638=LINE('',#50042,#6447);
#3639=LINE('',#50044,#6448);
#3640=LINE('',#50046,#6449);
#3641=LINE('',#50048,#6450);
#3642=LINE('',#50050,#6451);
#3643=LINE('',#50052,#6452);
#3644=LINE('',#50055,#6453);
#3645=LINE('',#50056,#6454);
#3646=LINE('',#50058,#6455);
#3647=LINE('',#50060,#6456);
#3648=LINE('',#50062,#6457);
#3649=LINE('',#50064,#6458);
#3650=LINE('',#50066,#6459);
#3651=LINE('',#50068,#6460);
#3652=LINE('',#50071,#6461);
#3653=LINE('',#50072,#6462);
#3654=LINE('',#50074,#6463);
#3655=LINE('',#50076,#6464);
#3656=LINE('',#50078,#6465);
#3657=LINE('',#50080,#6466);
#3658=LINE('',#50082,#6467);
#3659=LINE('',#50083,#6468);
#3660=LINE('',#50085,#6469);
#3661=LINE('',#50087,#6470);
#3662=LINE('',#50089,#6471);
#3663=LINE('',#50091,#6472);
#3664=LINE('',#50093,#6473);
#3665=LINE('',#50095,#6474);
#3666=LINE('',#50098,#6475);
#3667=LINE('',#50099,#6476);
#3668=LINE('',#50101,#6477);
#3669=LINE('',#50103,#6478);
#3670=LINE('',#50105,#6479);
#3671=LINE('',#50107,#6480);
#3672=LINE('',#50109,#6481);
#3673=LINE('',#50111,#6482);
#3674=LINE('',#50114,#6483);
#3675=LINE('',#50115,#6484);
#3676=LINE('',#50117,#6485);
#3677=LINE('',#50119,#6486);
#3678=LINE('',#50121,#6487);
#3679=LINE('',#50123,#6488);
#3680=LINE('',#50125,#6489);
#3681=LINE('',#50126,#6490);
#3682=LINE('',#50128,#6491);
#3683=LINE('',#50130,#6492);
#3684=LINE('',#50132,#6493);
#3685=LINE('',#50134,#6494);
#3686=LINE('',#50136,#6495);
#3687=LINE('',#50138,#6496);
#3688=LINE('',#50141,#6497);
#3689=LINE('',#50142,#6498);
#3690=LINE('',#50144,#6499);
#3691=LINE('',#50146,#6500);
#3692=LINE('',#50148,#6501);
#3693=LINE('',#50150,#6502);
#3694=LINE('',#50152,#6503);
#3695=LINE('',#50154,#6504);
#3696=LINE('',#50157,#6505);
#3697=LINE('',#50158,#6506);
#3698=LINE('',#50160,#6507);
#3699=LINE('',#50162,#6508);
#3700=LINE('',#50164,#6509);
#3701=LINE('',#50166,#6510);
#3702=LINE('',#50168,#6511);
#3703=LINE('',#50169,#6512);
#3704=LINE('',#50171,#6513);
#3705=LINE('',#50173,#6514);
#3706=LINE('',#50175,#6515);
#3707=LINE('',#50177,#6516);
#3708=LINE('',#50179,#6517);
#3709=LINE('',#50181,#6518);
#3710=LINE('',#50184,#6519);
#3711=LINE('',#50185,#6520);
#3712=LINE('',#50187,#6521);
#3713=LINE('',#50189,#6522);
#3714=LINE('',#50191,#6523);
#3715=LINE('',#50193,#6524);
#3716=LINE('',#50195,#6525);
#3717=LINE('',#50197,#6526);
#3718=LINE('',#50245,#6527);
#3719=LINE('',#50247,#6528);
#3720=LINE('',#50249,#6529);
#3721=LINE('',#50250,#6530);
#3722=LINE('',#50252,#6531);
#3723=LINE('',#50254,#6532);
#3724=LINE('',#50256,#6533);
#3725=LINE('',#50258,#6534);
#3726=LINE('',#50260,#6535);
#3727=LINE('',#50262,#6536);
#3728=LINE('',#50265,#6537);
#3729=LINE('',#50266,#6538);
#3730=LINE('',#50268,#6539);
#3731=LINE('',#50270,#6540);
#3732=LINE('',#50272,#6541);
#3733=LINE('',#50274,#6542);
#3734=LINE('',#50276,#6543);
#3735=LINE('',#50278,#6544);
#3736=LINE('',#50281,#6545);
#3737=LINE('',#50282,#6546);
#3738=LINE('',#50284,#6547);
#3739=LINE('',#50286,#6548);
#3740=LINE('',#50288,#6549);
#3741=LINE('',#50290,#6550);
#3742=LINE('',#50292,#6551);
#3743=LINE('',#50293,#6552);
#3744=LINE('',#50295,#6553);
#3745=LINE('',#50297,#6554);
#3746=LINE('',#50299,#6555);
#3747=LINE('',#50301,#6556);
#3748=LINE('',#50303,#6557);
#3749=LINE('',#50304,#6558);
#3750=LINE('',#50306,#6559);
#3751=LINE('',#50308,#6560);
#3752=LINE('',#50310,#6561);
#3753=LINE('',#50312,#6562);
#3754=LINE('',#50313,#6563);
#3755=LINE('',#50315,#6564);
#3756=LINE('',#50316,#6565);
#3757=LINE('',#50319,#6566);
#3758=LINE('',#50320,#6567);
#3759=LINE('',#50322,#6568);
#3760=LINE('',#50323,#6569);
#3761=LINE('',#50422,#6570);
#3762=LINE('',#50423,#6571);
#3763=LINE('',#50425,#6572);
#3764=LINE('',#50426,#6573);
#3765=LINE('',#50428,#6574);
#3766=LINE('',#50430,#6575);
#3767=LINE('',#50433,#6576);
#3768=LINE('',#50434,#6577);
#3769=LINE('',#50436,#6578);
#3770=LINE('',#50438,#6579);
#3771=LINE('',#50440,#6580);
#3772=LINE('',#50441,#6581);
#3773=LINE('',#50443,#6582);
#3774=LINE('',#50444,#6583);
#3775=LINE('',#50446,#6584);
#3776=LINE('',#50448,#6585);
#3777=LINE('',#50451,#6586);
#3778=LINE('',#50452,#6587);
#3779=LINE('',#50454,#6588);
#3780=LINE('',#50455,#6589);
#3781=LINE('',#50457,#6590);
#3782=LINE('',#50459,#6591);
#3783=LINE('',#50462,#6592);
#3784=LINE('',#50463,#6593);
#3785=LINE('',#50465,#6594);
#3786=LINE('',#50466,#6595);
#3787=LINE('',#50468,#6596);
#3788=LINE('',#50470,#6597);
#3789=LINE('',#50473,#6598);
#3790=LINE('',#50474,#6599);
#3791=LINE('',#50476,#6600);
#3792=LINE('',#50477,#6601);
#3793=LINE('',#50479,#6602);
#3794=LINE('',#50481,#6603);
#3795=LINE('',#50484,#6604);
#3796=LINE('',#50485,#6605);
#3797=LINE('',#50487,#6606);
#3798=LINE('',#50488,#6607);
#3799=LINE('',#50490,#6608);
#3800=LINE('',#50492,#6609);
#3801=LINE('',#50495,#6610);
#3802=LINE('',#50497,#6611);
#3803=LINE('',#50500,#6612);
#3804=LINE('',#50501,#6613);
#3805=LINE('',#50503,#6614);
#3806=LINE('',#50505,#6615);
#3807=LINE('',#50507,#6616);
#3808=LINE('',#50509,#6617);
#3809=LINE('',#50511,#6618);
#3810=LINE('',#50513,#6619);
#3811=LINE('',#50516,#6620);
#3812=LINE('',#50517,#6621);
#3813=LINE('',#50519,#6622);
#3814=LINE('',#50521,#6623);
#3815=LINE('',#50523,#6624);
#3816=LINE('',#50525,#6625);
#3817=LINE('',#50527,#6626);
#3818=LINE('',#50529,#6627);
#3819=LINE('',#50532,#6628);
#3820=LINE('',#50533,#6629);
#3821=LINE('',#50535,#6630);
#3822=LINE('',#50537,#6631);
#3823=LINE('',#50539,#6632);
#3824=LINE('',#50541,#6633);
#3825=LINE('',#50543,#6634);
#3826=LINE('',#50544,#6635);
#3827=LINE('',#50546,#6636);
#3828=LINE('',#50548,#6637);
#3829=LINE('',#50550,#6638);
#3830=LINE('',#50552,#6639);
#3831=LINE('',#50554,#6640);
#3832=LINE('',#50556,#6641);
#3833=LINE('',#50559,#6642);
#3834=LINE('',#50560,#6643);
#3835=LINE('',#50562,#6644);
#3836=LINE('',#50564,#6645);
#3837=LINE('',#50566,#6646);
#3838=LINE('',#50568,#6647);
#3839=LINE('',#50570,#6648);
#3840=LINE('',#50572,#6649);
#3841=LINE('',#50575,#6650);
#3842=LINE('',#50576,#6651);
#3843=LINE('',#50578,#6652);
#3844=LINE('',#50580,#6653);
#3845=LINE('',#50582,#6654);
#3846=LINE('',#50584,#6655);
#3847=LINE('',#50586,#6656);
#3848=LINE('',#50588,#6657);
#3849=LINE('',#50591,#6658);
#3850=LINE('',#50593,#6659);
#3851=LINE('',#50596,#6660);
#3852=LINE('',#50597,#6661);
#3853=LINE('',#50599,#6662);
#3854=LINE('',#50601,#6663);
#3855=LINE('',#50603,#6664);
#3856=LINE('',#50605,#6665);
#3857=LINE('',#50607,#6666);
#3858=LINE('',#50609,#6667);
#3859=LINE('',#50612,#6668);
#3860=LINE('',#50613,#6669);
#3861=LINE('',#50615,#6670);
#3862=LINE('',#50617,#6671);
#3863=LINE('',#50619,#6672);
#3864=LINE('',#50621,#6673);
#3865=LINE('',#50623,#6674);
#3866=LINE('',#50625,#6675);
#3867=LINE('',#50628,#6676);
#3868=LINE('',#50629,#6677);
#3869=LINE('',#50631,#6678);
#3870=LINE('',#50633,#6679);
#3871=LINE('',#50635,#6680);
#3872=LINE('',#50637,#6681);
#3873=LINE('',#50639,#6682);
#3874=LINE('',#50640,#6683);
#3875=LINE('',#50642,#6684);
#3876=LINE('',#50644,#6685);
#3877=LINE('',#50646,#6686);
#3878=LINE('',#50648,#6687);
#3879=LINE('',#50650,#6688);
#3880=LINE('',#50652,#6689);
#3881=LINE('',#50655,#6690);
#3882=LINE('',#50656,#6691);
#3883=LINE('',#50658,#6692);
#3884=LINE('',#50660,#6693);
#3885=LINE('',#50662,#6694);
#3886=LINE('',#50664,#6695);
#3887=LINE('',#50666,#6696);
#3888=LINE('',#50668,#6697);
#3889=LINE('',#50671,#6698);
#3890=LINE('',#50673,#6699);
#3891=LINE('',#50676,#6700);
#3892=LINE('',#50677,#6701);
#3893=LINE('',#50679,#6702);
#3894=LINE('',#50681,#6703);
#3895=LINE('',#50683,#6704);
#3896=LINE('',#50685,#6705);
#3897=LINE('',#50687,#6706);
#3898=LINE('',#50689,#6707);
#3899=LINE('',#50692,#6708);
#3900=LINE('',#50693,#6709);
#3901=LINE('',#50695,#6710);
#3902=LINE('',#50697,#6711);
#3903=LINE('',#50699,#6712);
#3904=LINE('',#50701,#6713);
#3905=LINE('',#50703,#6714);
#3906=LINE('',#50705,#6715);
#3907=LINE('',#50753,#6716);
#3908=LINE('',#50755,#6717);
#3909=LINE('',#50757,#6718);
#3910=LINE('',#50758,#6719);
#3911=LINE('',#50760,#6720);
#3912=LINE('',#50762,#6721);
#3913=LINE('',#50764,#6722);
#3914=LINE('',#50766,#6723);
#3915=LINE('',#50768,#6724);
#3916=LINE('',#50770,#6725);
#3917=LINE('',#50773,#6726);
#3918=LINE('',#50774,#6727);
#3919=LINE('',#50776,#6728);
#3920=LINE('',#50778,#6729);
#3921=LINE('',#50780,#6730);
#3922=LINE('',#50782,#6731);
#3923=LINE('',#50784,#6732);
#3924=LINE('',#50786,#6733);
#3925=LINE('',#50789,#6734);
#3926=LINE('',#50790,#6735);
#3927=LINE('',#50792,#6736);
#3928=LINE('',#50794,#6737);
#3929=LINE('',#50796,#6738);
#3930=LINE('',#50798,#6739);
#3931=LINE('',#50800,#6740);
#3932=LINE('',#50802,#6741);
#3933=LINE('',#50805,#6742);
#3934=LINE('',#50806,#6743);
#3935=LINE('',#50808,#6744);
#3936=LINE('',#50811,#6745);
#3937=LINE('',#50812,#6746);
#3938=LINE('',#50815,#6747);
#3939=LINE('',#50816,#6748);
#3940=LINE('',#50818,#6749);
#3941=LINE('',#50819,#6750);
#3942=LINE('',#50821,#6751);
#3943=LINE('',#50822,#6752);
#3944=LINE('',#50920,#6753);
#3945=LINE('',#50922,#6754);
#3946=LINE('',#50925,#6755);
#3947=LINE('',#50932,#6756);
#3948=LINE('',#50934,#6757);
#3949=LINE('',#50937,#6758);
#3950=LINE('',#50939,#6759);
#3951=LINE('',#50942,#6760);
#3952=LINE('',#50944,#6761);
#3953=LINE('',#50947,#6762);
#3954=LINE('',#50949,#6763);
#3955=LINE('',#50952,#6764);
#3956=LINE('',#50954,#6765);
#3957=LINE('',#50957,#6766);
#3958=LINE('',#50959,#6767);
#3959=LINE('',#50962,#6768);
#3960=LINE('',#50963,#6769);
#3961=LINE('',#50965,#6770);
#3962=LINE('',#50967,#6771);
#3963=LINE('',#50969,#6772);
#3964=LINE('',#50971,#6773);
#3965=LINE('',#50973,#6774);
#3966=LINE('',#50975,#6775);
#3967=LINE('',#50978,#6776);
#3968=LINE('',#50979,#6777);
#3969=LINE('',#50981,#6778);
#3970=LINE('',#50983,#6779);
#3971=LINE('',#50985,#6780);
#3972=LINE('',#50987,#6781);
#3973=LINE('',#50989,#6782);
#3974=LINE('',#50991,#6783);
#3975=LINE('',#50994,#6784);
#3976=LINE('',#50995,#6785);
#3977=LINE('',#50997,#6786);
#3978=LINE('',#50999,#6787);
#3979=LINE('',#51001,#6788);
#3980=LINE('',#51003,#6789);
#3981=LINE('',#51005,#6790);
#3982=LINE('',#51006,#6791);
#3983=LINE('',#51008,#6792);
#3984=LINE('',#51010,#6793);
#3985=LINE('',#51012,#6794);
#3986=LINE('',#51014,#6795);
#3987=LINE('',#51016,#6796);
#3988=LINE('',#51018,#6797);
#3989=LINE('',#51021,#6798);
#3990=LINE('',#51022,#6799);
#3991=LINE('',#51024,#6800);
#3992=LINE('',#51026,#6801);
#3993=LINE('',#51028,#6802);
#3994=LINE('',#51030,#6803);
#3995=LINE('',#51032,#6804);
#3996=LINE('',#51034,#6805);
#3997=LINE('',#51037,#6806);
#3998=LINE('',#51038,#6807);
#3999=LINE('',#51040,#6808);
#4000=LINE('',#51042,#6809);
#4001=LINE('',#51044,#6810);
#4002=LINE('',#51046,#6811);
#4003=LINE('',#51048,#6812);
#4004=LINE('',#51050,#6813);
#4005=LINE('',#51053,#6814);
#4006=LINE('',#51055,#6815);
#4007=LINE('',#51058,#6816);
#4008=LINE('',#51059,#6817);
#4009=LINE('',#51061,#6818);
#4010=LINE('',#51063,#6819);
#4011=LINE('',#51065,#6820);
#4012=LINE('',#51067,#6821);
#4013=LINE('',#51069,#6822);
#4014=LINE('',#51071,#6823);
#4015=LINE('',#51074,#6824);
#4016=LINE('',#51075,#6825);
#4017=LINE('',#51077,#6826);
#4018=LINE('',#51079,#6827);
#4019=LINE('',#51081,#6828);
#4020=LINE('',#51083,#6829);
#4021=LINE('',#51085,#6830);
#4022=LINE('',#51087,#6831);
#4023=LINE('',#51090,#6832);
#4024=LINE('',#51091,#6833);
#4025=LINE('',#51093,#6834);
#4026=LINE('',#51095,#6835);
#4027=LINE('',#51097,#6836);
#4028=LINE('',#51099,#6837);
#4029=LINE('',#51101,#6838);
#4030=LINE('',#51102,#6839);
#4031=LINE('',#51104,#6840);
#4032=LINE('',#51106,#6841);
#4033=LINE('',#51108,#6842);
#4034=LINE('',#51110,#6843);
#4035=LINE('',#51112,#6844);
#4036=LINE('',#51114,#6845);
#4037=LINE('',#51117,#6846);
#4038=LINE('',#51118,#6847);
#4039=LINE('',#51120,#6848);
#4040=LINE('',#51122,#6849);
#4041=LINE('',#51124,#6850);
#4042=LINE('',#51126,#6851);
#4043=LINE('',#51128,#6852);
#4044=LINE('',#51130,#6853);
#4045=LINE('',#51133,#6854);
#4046=LINE('',#51135,#6855);
#4047=LINE('',#51138,#6856);
#4048=LINE('',#51139,#6857);
#4049=LINE('',#51141,#6858);
#4050=LINE('',#51143,#6859);
#4051=LINE('',#51145,#6860);
#4052=LINE('',#51147,#6861);
#4053=LINE('',#51149,#6862);
#4054=LINE('',#51151,#6863);
#4055=LINE('',#51154,#6864);
#4056=LINE('',#51155,#6865);
#4057=LINE('',#51157,#6866);
#4058=LINE('',#51159,#6867);
#4059=LINE('',#51161,#6868);
#4060=LINE('',#51163,#6869);
#4061=LINE('',#51165,#6870);
#4062=LINE('',#51167,#6871);
#4063=LINE('',#51215,#6872);
#4064=LINE('',#51217,#6873);
#4065=LINE('',#51219,#6874);
#4066=LINE('',#51220,#6875);
#4067=LINE('',#51222,#6876);
#4068=LINE('',#51224,#6877);
#4069=LINE('',#51226,#6878);
#4070=LINE('',#51228,#6879);
#4071=LINE('',#51230,#6880);
#4072=LINE('',#51232,#6881);
#4073=LINE('',#51235,#6882);
#4074=LINE('',#51236,#6883);
#4075=LINE('',#51238,#6884);
#4076=LINE('',#51240,#6885);
#4077=LINE('',#51242,#6886);
#4078=LINE('',#51244,#6887);
#4079=LINE('',#51246,#6888);
#4080=LINE('',#51248,#6889);
#4081=LINE('',#51251,#6890);
#4082=LINE('',#51252,#6891);
#4083=LINE('',#51254,#6892);
#4084=LINE('',#51256,#6893);
#4085=LINE('',#51258,#6894);
#4086=LINE('',#51260,#6895);
#4087=LINE('',#51262,#6896);
#4088=LINE('',#51264,#6897);
#4089=LINE('',#51267,#6898);
#4090=LINE('',#51268,#6899);
#4091=LINE('',#51270,#6900);
#4092=LINE('',#51273,#6901);
#4093=LINE('',#51274,#6902);
#4094=LINE('',#51277,#6903);
#4095=LINE('',#51278,#6904);
#4096=LINE('',#51280,#6905);
#4097=LINE('',#51281,#6906);
#4098=VECTOR('',#32480,45.72);
#4099=VECTOR('',#32487,52.324);
#4100=VECTOR('',#32492,50.4825);
#4101=VECTOR('',#32499,49.4931015189506);
#4102=VECTOR('',#32506,49.4665);
#4103=VECTOR('',#32513,1000.);
#4104=VECTOR('',#32516,1000.);
#4105=VECTOR('',#32519,1000.);
#4106=VECTOR('',#32522,1000.);
#4107=VECTOR('',#32527,1000.);
#4108=VECTOR('',#32530,1000.);
#4109=VECTOR('',#32537,1000.);
#4110=VECTOR('',#32540,1000.);
#4111=VECTOR('',#32543,1000.);
#4112=VECTOR('',#32546,1000.);
#4113=VECTOR('',#32549,1000.);
#4114=VECTOR('',#32552,1000.);
#4115=VECTOR('',#32555,1000.);
#4116=VECTOR('',#32558,1000.);
#4117=VECTOR('',#32561,1000.);
#4118=VECTOR('',#32564,1000.);
#4119=VECTOR('',#32567,1000.);
#4120=VECTOR('',#32570,1000.);
#4121=VECTOR('',#32573,1000.);
#4122=VECTOR('',#32576,1000.);
#4123=VECTOR('',#32579,1000.);
#4124=VECTOR('',#32582,1000.);
#4125=VECTOR('',#32585,1000.);
#4126=VECTOR('',#32588,1000.);
#4127=VECTOR('',#32589,1000.);
#4128=VECTOR('',#32592,1000.);
#4129=VECTOR('',#32595,1000.);
#4130=VECTOR('',#32598,1000.);
#4131=VECTOR('',#32601,1000.);
#4132=VECTOR('',#32604,1000.);
#4133=VECTOR('',#32607,1000.);
#4134=VECTOR('',#32610,1000.);
#4135=VECTOR('',#32613,1000.);
#4136=VECTOR('',#32616,1000.);
#4137=VECTOR('',#32619,1000.);
#4138=VECTOR('',#32622,1000.);
#4139=VECTOR('',#32625,1000.);
#4140=VECTOR('',#32628,1000.);
#4141=VECTOR('',#32631,1000.);
#4142=VECTOR('',#32634,1000.);
#4143=VECTOR('',#32637,1000.);
#4144=VECTOR('',#32640,1000.);
#4145=VECTOR('',#32643,1000.);
#4146=VECTOR('',#32646,1000.);
#4147=VECTOR('',#32649,1000.);
#4148=VECTOR('',#32652,1000.);
#4149=VECTOR('',#32655,1000.);
#4150=VECTOR('',#32658,1000.);
#4151=VECTOR('',#32661,1000.);
#4152=VECTOR('',#32664,1000.);
#4153=VECTOR('',#32667,1000.);
#4154=VECTOR('',#32670,1000.);
#4155=VECTOR('',#32673,1000.);
#4156=VECTOR('',#32676,1000.);
#4157=VECTOR('',#32679,1000.);
#4158=VECTOR('',#32682,1000.);
#4159=VECTOR('',#32685,1000.);
#4160=VECTOR('',#32688,1000.);
#4161=VECTOR('',#32691,1000.);
#4162=VECTOR('',#32694,1000.);
#4163=VECTOR('',#32697,1000.);
#4164=VECTOR('',#32700,1000.);
#4165=VECTOR('',#32703,1000.);
#4166=VECTOR('',#32706,1000.);
#4167=VECTOR('',#32709,1000.);
#4168=VECTOR('',#32712,1000.);
#4169=VECTOR('',#32715,1000.);
#4170=VECTOR('',#32720,1000.);
#4171=VECTOR('',#32723,1000.);
#4172=VECTOR('',#32726,1000.);
#4173=VECTOR('',#32729,1000.);
#4174=VECTOR('',#32732,1000.);
#4175=VECTOR('',#32735,1000.);
#4176=VECTOR('',#32738,1000.);
#4177=VECTOR('',#32741,1000.);
#4178=VECTOR('',#32744,1000.);
#4179=VECTOR('',#32747,1000.);
#4180=VECTOR('',#32750,1000.);
#4181=VECTOR('',#32753,1000.);
#4182=VECTOR('',#32756,1000.);
#4183=VECTOR('',#32759,1000.);
#4184=VECTOR('',#32762,1000.);
#4185=VECTOR('',#32765,1000.);
#4186=VECTOR('',#32768,1000.);
#4187=VECTOR('',#32771,1000.);
#4188=VECTOR('',#32774,1000.);
#4189=VECTOR('',#32777,1000.);
#4190=VECTOR('',#32780,1000.);
#4191=VECTOR('',#32783,1000.);
#4192=VECTOR('',#32786,1000.);
#4193=VECTOR('',#32789,1000.);
#4194=VECTOR('',#32792,1000.);
#4195=VECTOR('',#32795,1000.);
#4196=VECTOR('',#32798,1000.);
#4197=VECTOR('',#32801,1000.);
#4198=VECTOR('',#32804,1000.);
#4199=VECTOR('',#32807,1000.);
#4200=VECTOR('',#32810,1000.);
#4201=VECTOR('',#32813,1000.);
#4202=VECTOR('',#32816,1000.);
#4203=VECTOR('',#32819,1000.);
#4204=VECTOR('',#32822,1000.);
#4205=VECTOR('',#32825,1000.);
#4206=VECTOR('',#32828,1000.);
#4207=VECTOR('',#32831,1000.);
#4208=VECTOR('',#32834,1000.);
#4209=VECTOR('',#32837,1000.);
#4210=VECTOR('',#32840,1000.);
#4211=VECTOR('',#32843,1000.);
#4212=VECTOR('',#32846,1000.);
#4213=VECTOR('',#32849,1000.);
#4214=VECTOR('',#32852,1000.);
#4215=VECTOR('',#32855,1000.);
#4216=VECTOR('',#32858,1000.);
#4217=VECTOR('',#32861,1000.);
#4218=VECTOR('',#32864,1000.);
#4219=VECTOR('',#32867,1000.);
#4220=VECTOR('',#32870,1000.);
#4221=VECTOR('',#32873,1000.);
#4222=VECTOR('',#32876,1000.);
#4223=VECTOR('',#32879,1000.);
#4224=VECTOR('',#32882,1000.);
#4225=VECTOR('',#32885,1000.);
#4226=VECTOR('',#32888,1000.);
#4227=VECTOR('',#32891,1000.);
#4228=VECTOR('',#32894,1000.);
#4229=VECTOR('',#32897,1000.);
#4230=VECTOR('',#32900,1000.);
#4231=VECTOR('',#32901,1000.);
#4232=VECTOR('',#32904,1000.);
#4233=VECTOR('',#32907,1000.);
#4234=VECTOR('',#32910,1000.);
#4235=VECTOR('',#32915,1000.);
#4236=VECTOR('',#32918,1000.);
#4237=VECTOR('',#32921,1000.);
#4238=VECTOR('',#32924,1000.);
#4239=VECTOR('',#32927,1000.);
#4240=VECTOR('',#32930,1000.);
#4241=VECTOR('',#32933,1000.);
#4242=VECTOR('',#32936,1000.);
#4243=VECTOR('',#32939,1000.);
#4244=VECTOR('',#32942,1000.);
#4245=VECTOR('',#32945,1000.);
#4246=VECTOR('',#32948,1000.);
#4247=VECTOR('',#32951,1000.);
#4248=VECTOR('',#32954,1000.);
#4249=VECTOR('',#32957,1000.);
#4250=VECTOR('',#32960,1000.);
#4251=VECTOR('',#32963,1000.);
#4252=VECTOR('',#32966,1000.);
#4253=VECTOR('',#32969,1000.);
#4254=VECTOR('',#32972,1000.);
#4255=VECTOR('',#32975,1000.);
#4256=VECTOR('',#32978,1000.);
#4257=VECTOR('',#32981,1000.);
#4258=VECTOR('',#32984,1000.);
#4259=VECTOR('',#32987,1000.);
#4260=VECTOR('',#32990,1000.);
#4261=VECTOR('',#32993,1000.);
#4262=VECTOR('',#32996,1000.);
#4263=VECTOR('',#32999,1000.);
#4264=VECTOR('',#33002,1000.);
#4265=VECTOR('',#33005,1000.);
#4266=VECTOR('',#33008,1000.);
#4267=VECTOR('',#33011,1000.);
#4268=VECTOR('',#33014,1000.);
#4269=VECTOR('',#33017,1000.);
#4270=VECTOR('',#33020,1000.);
#4271=VECTOR('',#33023,1000.);
#4272=VECTOR('',#33026,1000.);
#4273=VECTOR('',#33029,1000.);
#4274=VECTOR('',#33032,1000.);
#4275=VECTOR('',#33035,1000.);
#4276=VECTOR('',#33038,1000.);
#4277=VECTOR('',#33041,1000.);
#4278=VECTOR('',#33044,1000.);
#4279=VECTOR('',#33047,1000.);
#4280=VECTOR('',#33050,1000.);
#4281=VECTOR('',#33053,1000.);
#4282=VECTOR('',#33056,1000.);
#4283=VECTOR('',#33059,1000.);
#4284=VECTOR('',#33062,1000.);
#4285=VECTOR('',#33065,1000.);
#4286=VECTOR('',#33068,1000.);
#4287=VECTOR('',#33071,1000.);
#4288=VECTOR('',#33074,1000.);
#4289=VECTOR('',#33077,1000.);
#4290=VECTOR('',#33080,1000.);
#4291=VECTOR('',#33083,1000.);
#4292=VECTOR('',#33086,1000.);
#4293=VECTOR('',#33089,1000.);
#4294=VECTOR('',#33092,1000.);
#4295=VECTOR('',#33095,1000.);
#4296=VECTOR('',#33098,1000.);
#4297=VECTOR('',#33101,1000.);
#4298=VECTOR('',#33108,1000.);
#4299=VECTOR('',#33111,1000.);
#4300=VECTOR('',#33114,1000.);
#4301=VECTOR('',#33117,1000.);
#4302=VECTOR('',#33120,1000.);
#4303=VECTOR('',#33123,1000.);
#4304=VECTOR('',#33126,1000.);
#4305=VECTOR('',#33129,1000.);
#4306=VECTOR('',#33132,1000.);
#4307=VECTOR('',#33135,1000.);
#4308=VECTOR('',#33138,1000.);
#4309=VECTOR('',#33141,1000.);
#4310=VECTOR('',#33144,1000.);
#4311=VECTOR('',#33147,1000.);
#4312=VECTOR('',#33148,1000.);
#4313=VECTOR('',#33151,1000.);
#4314=VECTOR('',#33154,1000.);
#4315=VECTOR('',#33157,1000.);
#4316=VECTOR('',#33160,1000.);
#4317=VECTOR('',#33163,1000.);
#4318=VECTOR('',#33166,1000.);
#4319=VECTOR('',#33169,1000.);
#4320=VECTOR('',#33172,1000.);
#4321=VECTOR('',#33175,1000.);
#4322=VECTOR('',#33178,1000.);
#4323=VECTOR('',#33181,1000.);
#4324=VECTOR('',#33184,1000.);
#4325=VECTOR('',#33187,1000.);
#4326=VECTOR('',#33190,1000.);
#4327=VECTOR('',#33193,1000.);
#4328=VECTOR('',#33196,1000.);
#4329=VECTOR('',#33199,1000.);
#4330=VECTOR('',#33202,1000.);
#4331=VECTOR('',#33205,1000.);
#4332=VECTOR('',#33208,1000.);
#4333=VECTOR('',#33211,1000.);
#4334=VECTOR('',#33214,1000.);
#4335=VECTOR('',#33217,1000.);
#4336=VECTOR('',#33220,1000.);
#4337=VECTOR('',#33223,1000.);
#4338=VECTOR('',#33226,1000.);
#4339=VECTOR('',#33231,1000.);
#4340=VECTOR('',#33234,1000.);
#4341=VECTOR('',#33237,1000.);
#4342=VECTOR('',#33240,1000.);
#4343=VECTOR('',#33243,1000.);
#4344=VECTOR('',#33246,1000.);
#4345=VECTOR('',#33249,1000.);
#4346=VECTOR('',#33252,1000.);
#4347=VECTOR('',#33255,1000.);
#4348=VECTOR('',#33258,1000.);
#4349=VECTOR('',#33261,1000.);
#4350=VECTOR('',#33264,1000.);
#4351=VECTOR('',#33267,1000.);
#4352=VECTOR('',#33270,1000.);
#4353=VECTOR('',#33273,1000.);
#4354=VECTOR('',#33276,1000.);
#4355=VECTOR('',#33279,1000.);
#4356=VECTOR('',#33282,1000.);
#4357=VECTOR('',#33285,1000.);
#4358=VECTOR('',#33288,1000.);
#4359=VECTOR('',#33291,1000.);
#4360=VECTOR('',#33294,1000.);
#4361=VECTOR('',#33297,1000.);
#4362=VECTOR('',#33300,1000.);
#4363=VECTOR('',#33303,1000.);
#4364=VECTOR('',#33306,1000.);
#4365=VECTOR('',#33309,1000.);
#4366=VECTOR('',#33312,1000.);
#4367=VECTOR('',#33315,1000.);
#4368=VECTOR('',#33318,1000.);
#4369=VECTOR('',#33321,1000.);
#4370=VECTOR('',#33324,1000.);
#4371=VECTOR('',#33327,1000.);
#4372=VECTOR('',#33330,1000.);
#4373=VECTOR('',#33333,1000.);
#4374=VECTOR('',#33336,1000.);
#4375=VECTOR('',#33339,1000.);
#4376=VECTOR('',#33342,1000.);
#4377=VECTOR('',#33345,1000.);
#4378=VECTOR('',#33348,1000.);
#4379=VECTOR('',#33351,1000.);
#4380=VECTOR('',#33354,1000.);
#4381=VECTOR('',#33357,1000.);
#4382=VECTOR('',#33360,1000.);
#4383=VECTOR('',#33363,1000.);
#4384=VECTOR('',#33366,1000.);
#4385=VECTOR('',#33369,1000.);
#4386=VECTOR('',#33372,1000.);
#4387=VECTOR('',#33375,1000.);
#4388=VECTOR('',#33378,1000.);
#4389=VECTOR('',#33381,1000.);
#4390=VECTOR('',#33384,1000.);
#4391=VECTOR('',#33387,1000.);
#4392=VECTOR('',#33390,1000.);
#4393=VECTOR('',#33393,1000.);
#4394=VECTOR('',#33396,1000.);
#4395=VECTOR('',#33399,1000.);
#4396=VECTOR('',#33402,1000.);
#4397=VECTOR('',#33405,1000.);
#4398=VECTOR('',#33408,1000.);
#4399=VECTOR('',#33411,1000.);
#4400=VECTOR('',#33412,1000.);
#4401=VECTOR('',#33415,1000.);
#4402=VECTOR('',#33418,1000.);
#4403=VECTOR('',#33421,1000.);
#4404=VECTOR('',#33426,1000.);
#4405=VECTOR('',#33429,1000.);
#4406=VECTOR('',#33432,1000.);
#4407=VECTOR('',#33435,1000.);
#4408=VECTOR('',#33438,1000.);
#4409=VECTOR('',#33441,1000.);
#4410=VECTOR('',#33444,1000.);
#4411=VECTOR('',#33447,1000.);
#4412=VECTOR('',#33450,1000.);
#4413=VECTOR('',#33453,1000.);
#4414=VECTOR('',#33456,1000.);
#4415=VECTOR('',#33459,1000.);
#4416=VECTOR('',#33462,1000.);
#4417=VECTOR('',#33465,1000.);
#4418=VECTOR('',#33468,1000.);
#4419=VECTOR('',#33471,1000.);
#4420=VECTOR('',#33474,1000.);
#4421=VECTOR('',#33477,1000.);
#4422=VECTOR('',#33480,1000.);
#4423=VECTOR('',#33483,1000.);
#4424=VECTOR('',#33486,1000.);
#4425=VECTOR('',#33489,1000.);
#4426=VECTOR('',#33492,1000.);
#4427=VECTOR('',#33495,1000.);
#4428=VECTOR('',#33498,1000.);
#4429=VECTOR('',#33501,1000.);
#4430=VECTOR('',#33504,1000.);
#4431=VECTOR('',#33507,1000.);
#4432=VECTOR('',#33510,1000.);
#4433=VECTOR('',#33513,1000.);
#4434=VECTOR('',#33516,1000.);
#4435=VECTOR('',#33519,1000.);
#4436=VECTOR('',#33522,1000.);
#4437=VECTOR('',#33525,1000.);
#4438=VECTOR('',#33528,1000.);
#4439=VECTOR('',#33531,1000.);
#4440=VECTOR('',#33534,1000.);
#4441=VECTOR('',#33537,1000.);
#4442=VECTOR('',#33540,1000.);
#4443=VECTOR('',#33543,1000.);
#4444=VECTOR('',#33546,1000.);
#4445=VECTOR('',#33549,1000.);
#4446=VECTOR('',#33552,1000.);
#4447=VECTOR('',#33555,1000.);
#4448=VECTOR('',#33558,1000.);
#4449=VECTOR('',#33561,1000.);
#4450=VECTOR('',#33564,1000.);
#4451=VECTOR('',#33567,1000.);
#4452=VECTOR('',#33570,1000.);
#4453=VECTOR('',#33573,1000.);
#4454=VECTOR('',#33576,1000.);
#4455=VECTOR('',#33579,1000.);
#4456=VECTOR('',#33582,1000.);
#4457=VECTOR('',#33585,1000.);
#4458=VECTOR('',#33588,1000.);
#4459=VECTOR('',#33591,1000.);
#4460=VECTOR('',#33594,1000.);
#4461=VECTOR('',#33597,1000.);
#4462=VECTOR('',#33600,1000.);
#4463=VECTOR('',#33603,1000.);
#4464=VECTOR('',#33606,1000.);
#4465=VECTOR('',#33609,1000.);
#4466=VECTOR('',#33612,1000.);
#4467=VECTOR('',#33619,1000.);
#4468=VECTOR('',#33622,1000.);
#4469=VECTOR('',#33625,1000.);
#4470=VECTOR('',#33628,1000.);
#4471=VECTOR('',#33631,1000.);
#4472=VECTOR('',#33634,1000.);
#4473=VECTOR('',#33637,1000.);
#4474=VECTOR('',#33640,1000.);
#4475=VECTOR('',#33643,1000.);
#4476=VECTOR('',#33646,1000.);
#4477=VECTOR('',#33649,1000.);
#4478=VECTOR('',#33652,1000.);
#4479=VECTOR('',#33655,1000.);
#4480=VECTOR('',#33658,1000.);
#4481=VECTOR('',#33659,1000.);
#4482=VECTOR('',#33662,1000.);
#4483=VECTOR('',#33665,1000.);
#4484=VECTOR('',#33668,1000.);
#4485=VECTOR('',#33671,1000.);
#4486=VECTOR('',#33674,1000.);
#4487=VECTOR('',#33677,1000.);
#4488=VECTOR('',#33680,1000.);
#4489=VECTOR('',#33683,1000.);
#4490=VECTOR('',#33686,1000.);
#4491=VECTOR('',#33689,1000.);
#4492=VECTOR('',#33692,1000.);
#4493=VECTOR('',#33695,1000.);
#4494=VECTOR('',#33698,1000.);
#4495=VECTOR('',#33701,1000.);
#4496=VECTOR('',#33704,1000.);
#4497=VECTOR('',#33707,1000.);
#4498=VECTOR('',#33710,1000.);
#4499=VECTOR('',#33713,1000.);
#4500=VECTOR('',#33716,1000.);
#4501=VECTOR('',#33719,1000.);
#4502=VECTOR('',#33722,1000.);
#4503=VECTOR('',#33725,1000.);
#4504=VECTOR('',#33728,1000.);
#4505=VECTOR('',#33731,1000.);
#4506=VECTOR('',#33734,1000.);
#4507=VECTOR('',#33737,1000.);
#4508=VECTOR('',#33742,1000.);
#4509=VECTOR('',#33745,1000.);
#4510=VECTOR('',#33748,1000.);
#4511=VECTOR('',#33751,1000.);
#4512=VECTOR('',#33754,1000.);
#4513=VECTOR('',#33757,1000.);
#4514=VECTOR('',#33760,1000.);
#4515=VECTOR('',#33763,1000.);
#4516=VECTOR('',#33766,1000.);
#4517=VECTOR('',#33769,1000.);
#4518=VECTOR('',#33772,1000.);
#4519=VECTOR('',#33775,1000.);
#4520=VECTOR('',#33778,1000.);
#4521=VECTOR('',#33781,1000.);
#4522=VECTOR('',#33784,1000.);
#4523=VECTOR('',#33787,1000.);
#4524=VECTOR('',#33790,1000.);
#4525=VECTOR('',#33793,1000.);
#4526=VECTOR('',#33796,1000.);
#4527=VECTOR('',#33799,1000.);
#4528=VECTOR('',#33802,1000.);
#4529=VECTOR('',#33805,1000.);
#4530=VECTOR('',#33808,1000.);
#4531=VECTOR('',#33811,1000.);
#4532=VECTOR('',#33814,1000.);
#4533=VECTOR('',#33817,1000.);
#4534=VECTOR('',#33820,1000.);
#4535=VECTOR('',#33823,1000.);
#4536=VECTOR('',#33826,1000.);
#4537=VECTOR('',#33829,1000.);
#4538=VECTOR('',#33832,1000.);
#4539=VECTOR('',#33835,1000.);
#4540=VECTOR('',#33838,1000.);
#4541=VECTOR('',#33841,1000.);
#4542=VECTOR('',#33844,1000.);
#4543=VECTOR('',#33847,1000.);
#4544=VECTOR('',#33850,1000.);
#4545=VECTOR('',#33853,1000.);
#4546=VECTOR('',#33856,1000.);
#4547=VECTOR('',#33859,1000.);
#4548=VECTOR('',#33862,1000.);
#4549=VECTOR('',#33865,1000.);
#4550=VECTOR('',#33868,1000.);
#4551=VECTOR('',#33871,1000.);
#4552=VECTOR('',#33874,1000.);
#4553=VECTOR('',#33877,1000.);
#4554=VECTOR('',#33880,1000.);
#4555=VECTOR('',#33883,1000.);
#4556=VECTOR('',#33886,1000.);
#4557=VECTOR('',#33889,1000.);
#4558=VECTOR('',#33892,1000.);
#4559=VECTOR('',#33895,1000.);
#4560=VECTOR('',#33898,1000.);
#4561=VECTOR('',#33901,1000.);
#4562=VECTOR('',#33904,1000.);
#4563=VECTOR('',#33907,1000.);
#4564=VECTOR('',#33910,1000.);
#4565=VECTOR('',#33913,1000.);
#4566=VECTOR('',#33916,1000.);
#4567=VECTOR('',#33919,1000.);
#4568=VECTOR('',#33922,1000.);
#4569=VECTOR('',#33923,1000.);
#4570=VECTOR('',#33926,1000.);
#4571=VECTOR('',#33929,1000.);
#4572=VECTOR('',#33932,1000.);
#4573=VECTOR('',#33937,1000.);
#4574=VECTOR('',#33940,1000.);
#4575=VECTOR('',#33943,1000.);
#4576=VECTOR('',#33946,1000.);
#4577=VECTOR('',#33949,1000.);
#4578=VECTOR('',#33952,1000.);
#4579=VECTOR('',#33955,1000.);
#4580=VECTOR('',#33958,1000.);
#4581=VECTOR('',#33961,1000.);
#4582=VECTOR('',#33964,1000.);
#4583=VECTOR('',#33967,1000.);
#4584=VECTOR('',#33970,1000.);
#4585=VECTOR('',#33973,1000.);
#4586=VECTOR('',#33976,1000.);
#4587=VECTOR('',#33979,1000.);
#4588=VECTOR('',#33982,1000.);
#4589=VECTOR('',#33985,1000.);
#4590=VECTOR('',#33988,1000.);
#4591=VECTOR('',#33991,1000.);
#4592=VECTOR('',#33994,1000.);
#4593=VECTOR('',#33997,1000.);
#4594=VECTOR('',#34000,1000.);
#4595=VECTOR('',#34003,1000.);
#4596=VECTOR('',#34006,1000.);
#4597=VECTOR('',#34009,1000.);
#4598=VECTOR('',#34012,1000.);
#4599=VECTOR('',#34015,1000.);
#4600=VECTOR('',#34018,1000.);
#4601=VECTOR('',#34021,1000.);
#4602=VECTOR('',#34024,1000.);
#4603=VECTOR('',#34027,1000.);
#4604=VECTOR('',#34030,1000.);
#4605=VECTOR('',#34033,1000.);
#4606=VECTOR('',#34036,1000.);
#4607=VECTOR('',#34039,1000.);
#4608=VECTOR('',#34042,1000.);
#4609=VECTOR('',#34045,1000.);
#4610=VECTOR('',#34048,1000.);
#4611=VECTOR('',#34051,1000.);
#4612=VECTOR('',#34054,1000.);
#4613=VECTOR('',#34057,1000.);
#4614=VECTOR('',#34060,1000.);
#4615=VECTOR('',#34063,1000.);
#4616=VECTOR('',#34066,1000.);
#4617=VECTOR('',#34069,1000.);
#4618=VECTOR('',#34072,1000.);
#4619=VECTOR('',#34075,1000.);
#4620=VECTOR('',#34078,1000.);
#4621=VECTOR('',#34081,1000.);
#4622=VECTOR('',#34084,1000.);
#4623=VECTOR('',#34087,1000.);
#4624=VECTOR('',#34090,1000.);
#4625=VECTOR('',#34093,1000.);
#4626=VECTOR('',#34096,1000.);
#4627=VECTOR('',#34099,1000.);
#4628=VECTOR('',#34102,1000.);
#4629=VECTOR('',#34105,1000.);
#4630=VECTOR('',#34108,1000.);
#4631=VECTOR('',#34111,1000.);
#4632=VECTOR('',#34114,1000.);
#4633=VECTOR('',#34117,1000.);
#4634=VECTOR('',#34118,1000.);
#4635=VECTOR('',#34121,1000.);
#4636=VECTOR('',#34124,1000.);
#4637=VECTOR('',#34127,1000.);
#4638=VECTOR('',#34130,1000.);
#4639=VECTOR('',#34133,1000.);
#4640=VECTOR('',#34136,1000.);
#4641=VECTOR('',#34139,1000.);
#4642=VECTOR('',#34142,1000.);
#4643=VECTOR('',#34145,1000.);
#4644=VECTOR('',#34148,1000.);
#4645=VECTOR('',#34151,1000.);
#4646=VECTOR('',#34154,1000.);
#4647=VECTOR('',#34157,1000.);
#4648=VECTOR('',#34160,1000.);
#4649=VECTOR('',#34163,1000.);
#4650=VECTOR('',#34166,1000.);
#4651=VECTOR('',#34169,1000.);
#4652=VECTOR('',#34172,1000.);
#4653=VECTOR('',#34175,1000.);
#4654=VECTOR('',#34178,1000.);
#4655=VECTOR('',#34181,1000.);
#4656=VECTOR('',#34184,1000.);
#4657=VECTOR('',#34187,1000.);
#4658=VECTOR('',#34190,1000.);
#4659=VECTOR('',#34193,1000.);
#4660=VECTOR('',#34196,1000.);
#4661=VECTOR('',#34201,1000.);
#4662=VECTOR('',#34204,1000.);
#4663=VECTOR('',#34207,1000.);
#4664=VECTOR('',#34210,1000.);
#4665=VECTOR('',#34213,1000.);
#4666=VECTOR('',#34216,1000.);
#4667=VECTOR('',#34219,1000.);
#4668=VECTOR('',#34222,1000.);
#4669=VECTOR('',#34225,1000.);
#4670=VECTOR('',#34228,1000.);
#4671=VECTOR('',#34231,1000.);
#4672=VECTOR('',#34234,1000.);
#4673=VECTOR('',#34237,1000.);
#4674=VECTOR('',#34240,1000.);
#4675=VECTOR('',#34243,1000.);
#4676=VECTOR('',#34246,1000.);
#4677=VECTOR('',#34249,1000.);
#4678=VECTOR('',#34252,1000.);
#4679=VECTOR('',#34255,1000.);
#4680=VECTOR('',#34258,1000.);
#4681=VECTOR('',#34261,1000.);
#4682=VECTOR('',#34264,1000.);
#4683=VECTOR('',#34267,1000.);
#4684=VECTOR('',#34270,1000.);
#4685=VECTOR('',#34273,1000.);
#4686=VECTOR('',#34276,1000.);
#4687=VECTOR('',#34279,1000.);
#4688=VECTOR('',#34282,1000.);
#4689=VECTOR('',#34285,1000.);
#4690=VECTOR('',#34288,1000.);
#4691=VECTOR('',#34291,1000.);
#4692=VECTOR('',#34294,1000.);
#4693=VECTOR('',#34297,1000.);
#4694=VECTOR('',#34300,1000.);
#4695=VECTOR('',#34303,1000.);
#4696=VECTOR('',#34306,1000.);
#4697=VECTOR('',#34309,1000.);
#4698=VECTOR('',#34312,1000.);
#4699=VECTOR('',#34315,1000.);
#4700=VECTOR('',#34318,1000.);
#4701=VECTOR('',#34321,1000.);
#4702=VECTOR('',#34324,1000.);
#4703=VECTOR('',#34327,1000.);
#4704=VECTOR('',#34330,1000.);
#4705=VECTOR('',#34333,1000.);
#4706=VECTOR('',#34336,1000.);
#4707=VECTOR('',#34339,1000.);
#4708=VECTOR('',#34342,1000.);
#4709=VECTOR('',#34345,1000.);
#4710=VECTOR('',#34348,1000.);
#4711=VECTOR('',#34351,1000.);
#4712=VECTOR('',#34354,1000.);
#4713=VECTOR('',#34357,1000.);
#4714=VECTOR('',#34360,1000.);
#4715=VECTOR('',#34363,1000.);
#4716=VECTOR('',#34366,1000.);
#4717=VECTOR('',#34369,1000.);
#4718=VECTOR('',#34372,1000.);
#4719=VECTOR('',#34375,1000.);
#4720=VECTOR('',#34378,1000.);
#4721=VECTOR('',#34381,1000.);
#4722=VECTOR('',#34384,1000.);
#4723=VECTOR('',#34387,1000.);
#4724=VECTOR('',#34390,1000.);
#4725=VECTOR('',#34393,1000.);
#4726=VECTOR('',#34396,1000.);
#4727=VECTOR('',#34399,1000.);
#4728=VECTOR('',#34402,1000.);
#4729=VECTOR('',#34405,1000.);
#4730=VECTOR('',#34408,1000.);
#4731=VECTOR('',#34411,1000.);
#4732=VECTOR('',#34414,1000.);
#4733=VECTOR('',#34417,1000.);
#4734=VECTOR('',#34420,1000.);
#4735=VECTOR('',#34423,1000.);
#4736=VECTOR('',#34426,1000.);
#4737=VECTOR('',#34429,1000.);
#4738=VECTOR('',#34432,1000.);
#4739=VECTOR('',#34435,1000.);
#4740=VECTOR('',#34438,1000.);
#4741=VECTOR('',#34441,1000.);
#4742=VECTOR('',#34444,1000.);
#4743=VECTOR('',#34447,1000.);
#4744=VECTOR('',#34450,1000.);
#4745=VECTOR('',#34453,1000.);
#4746=VECTOR('',#34456,1000.);
#4747=VECTOR('',#34459,1000.);
#4748=VECTOR('',#34462,1000.);
#4749=VECTOR('',#34465,1000.);
#4750=VECTOR('',#34468,1000.);
#4751=VECTOR('',#34471,1000.);
#4752=VECTOR('',#34474,1000.);
#4753=VECTOR('',#34477,1000.);
#4754=VECTOR('',#34480,1000.);
#4755=VECTOR('',#34483,1000.);
#4756=VECTOR('',#34486,1000.);
#4757=VECTOR('',#34489,1000.);
#4758=VECTOR('',#34492,1000.);
#4759=VECTOR('',#34495,1000.);
#4760=VECTOR('',#34498,1000.);
#4761=VECTOR('',#34501,1000.);
#4762=VECTOR('',#34504,1000.);
#4763=VECTOR('',#34507,1000.);
#4764=VECTOR('',#34510,1000.);
#4765=VECTOR('',#34513,1000.);
#4766=VECTOR('',#34516,1000.);
#4767=VECTOR('',#34519,1000.);
#4768=VECTOR('',#34522,1000.);
#4769=VECTOR('',#34525,1000.);
#4770=VECTOR('',#34528,1000.);
#4771=VECTOR('',#34531,1000.);
#4772=VECTOR('',#34534,1000.);
#4773=VECTOR('',#34537,1000.);
#4774=VECTOR('',#34540,1000.);
#4775=VECTOR('',#34543,1000.);
#4776=VECTOR('',#34546,1000.);
#4777=VECTOR('',#34549,1000.);
#4778=VECTOR('',#34552,1000.);
#4779=VECTOR('',#34555,1000.);
#4780=VECTOR('',#34558,1000.);
#4781=VECTOR('',#34561,1000.);
#4782=VECTOR('',#34564,1000.);
#4783=VECTOR('',#34569,1000.);
#4784=VECTOR('',#34572,1000.);
#4785=VECTOR('',#34575,1000.);
#4786=VECTOR('',#34578,1000.);
#4787=VECTOR('',#34581,1000.);
#4788=VECTOR('',#34584,1000.);
#4789=VECTOR('',#34589,1000.);
#4790=VECTOR('',#34592,1000.);
#4791=VECTOR('',#34595,1000.);
#4792=VECTOR('',#34598,1000.);
#4793=VECTOR('',#34601,1000.);
#4794=VECTOR('',#34604,1000.);
#4795=VECTOR('',#34607,1000.);
#4796=VECTOR('',#34610,1000.);
#4797=VECTOR('',#34613,1000.);
#4798=VECTOR('',#34616,1000.);
#4799=VECTOR('',#34619,1000.);
#4800=VECTOR('',#34622,1000.);
#4801=VECTOR('',#34625,1000.);
#4802=VECTOR('',#34628,1000.);
#4803=VECTOR('',#34631,1000.);
#4804=VECTOR('',#34634,1000.);
#4805=VECTOR('',#34637,1000.);
#4806=VECTOR('',#34640,1000.);
#4807=VECTOR('',#34643,1000.);
#4808=VECTOR('',#34646,1000.);
#4809=VECTOR('',#34649,1000.);
#4810=VECTOR('',#34652,1000.);
#4811=VECTOR('',#34655,1000.);
#4812=VECTOR('',#34658,1000.);
#4813=VECTOR('',#34661,1000.);
#4814=VECTOR('',#34664,1000.);
#4815=VECTOR('',#34667,1000.);
#4816=VECTOR('',#34670,1000.);
#4817=VECTOR('',#34673,1000.);
#4818=VECTOR('',#34676,1000.);
#4819=VECTOR('',#34679,1000.);
#4820=VECTOR('',#34682,1000.);
#4821=VECTOR('',#34685,1000.);
#4822=VECTOR('',#34688,1000.);
#4823=VECTOR('',#34691,1000.);
#4824=VECTOR('',#34694,1000.);
#4825=VECTOR('',#34697,1000.);
#4826=VECTOR('',#34700,1000.);
#4827=VECTOR('',#34703,1000.);
#4828=VECTOR('',#34706,1000.);
#4829=VECTOR('',#34709,1000.);
#4830=VECTOR('',#34712,1000.);
#4831=VECTOR('',#34715,1000.);
#4832=VECTOR('',#34718,1000.);
#4833=VECTOR('',#34721,1000.);
#4834=VECTOR('',#34724,1000.);
#4835=VECTOR('',#34727,1000.);
#4836=VECTOR('',#34730,1000.);
#4837=VECTOR('',#34733,1000.);
#4838=VECTOR('',#34736,1000.);
#4839=VECTOR('',#34739,1000.);
#4840=VECTOR('',#34742,1000.);
#4841=VECTOR('',#34745,1000.);
#4842=VECTOR('',#34748,1000.);
#4843=VECTOR('',#34751,1000.);
#4844=VECTOR('',#34754,1000.);
#4845=VECTOR('',#34755,1000.);
#4846=VECTOR('',#34758,1000.);
#4847=VECTOR('',#34761,1000.);
#4848=VECTOR('',#34766,1000.);
#4849=VECTOR('',#34769,1000.);
#4850=VECTOR('',#34772,1000.);
#4851=VECTOR('',#34775,1000.);
#4852=VECTOR('',#34780,1000.);
#4853=VECTOR('',#34783,1000.);
#4854=VECTOR('',#34786,1000.);
#4855=VECTOR('',#34789,1000.);
#4856=VECTOR('',#34792,1000.);
#4857=VECTOR('',#34795,1000.);
#4858=VECTOR('',#34798,1000.);
#4859=VECTOR('',#34801,1000.);
#4860=VECTOR('',#34804,1000.);
#4861=VECTOR('',#34807,1000.);
#4862=VECTOR('',#34810,1000.);
#4863=VECTOR('',#34813,1000.);
#4864=VECTOR('',#34816,1000.);
#4865=VECTOR('',#34819,1000.);
#4866=VECTOR('',#34822,1000.);
#4867=VECTOR('',#34825,1000.);
#4868=VECTOR('',#34828,1000.);
#4869=VECTOR('',#34831,1000.);
#4870=VECTOR('',#34834,1000.);
#4871=VECTOR('',#34837,1000.);
#4872=VECTOR('',#34840,1000.);
#4873=VECTOR('',#34843,1000.);
#4874=VECTOR('',#34846,1000.);
#4875=VECTOR('',#34849,1000.);
#4876=VECTOR('',#34852,1000.);
#4877=VECTOR('',#34855,1000.);
#4878=VECTOR('',#34858,1000.);
#4879=VECTOR('',#34861,1000.);
#4880=VECTOR('',#34864,1000.);
#4881=VECTOR('',#34867,1000.);
#4882=VECTOR('',#34870,1000.);
#4883=VECTOR('',#34873,1000.);
#4884=VECTOR('',#34876,1000.);
#4885=VECTOR('',#34879,1000.);
#4886=VECTOR('',#34882,1000.);
#4887=VECTOR('',#34885,1000.);
#4888=VECTOR('',#34888,1000.);
#4889=VECTOR('',#34891,1000.);
#4890=VECTOR('',#34894,1000.);
#4891=VECTOR('',#34897,1000.);
#4892=VECTOR('',#34900,1000.);
#4893=VECTOR('',#34903,1000.);
#4894=VECTOR('',#34906,1000.);
#4895=VECTOR('',#34909,1000.);
#4896=VECTOR('',#34912,1000.);
#4897=VECTOR('',#34915,1000.);
#4898=VECTOR('',#34918,1000.);
#4899=VECTOR('',#34921,1000.);
#4900=VECTOR('',#34924,1000.);
#4901=VECTOR('',#34927,1000.);
#4902=VECTOR('',#34930,1000.);
#4903=VECTOR('',#34933,1000.);
#4904=VECTOR('',#34936,1000.);
#4905=VECTOR('',#34939,1000.);
#4906=VECTOR('',#34942,1000.);
#4907=VECTOR('',#34943,1000.);
#4908=VECTOR('',#34946,1000.);
#4909=VECTOR('',#34949,1000.);
#4910=VECTOR('',#34954,1000.);
#4911=VECTOR('',#34957,1000.);
#4912=VECTOR('',#34960,1000.);
#4913=VECTOR('',#34963,1000.);
#4914=VECTOR('',#34966,1000.);
#4915=VECTOR('',#34969,1000.);
#4916=VECTOR('',#34972,1000.);
#4917=VECTOR('',#34975,1000.);
#4918=VECTOR('',#34978,1000.);
#4919=VECTOR('',#34981,1000.);
#4920=VECTOR('',#34984,1000.);
#4921=VECTOR('',#34987,1000.);
#4922=VECTOR('',#34990,1000.);
#4923=VECTOR('',#34993,1000.);
#4924=VECTOR('',#34996,1000.);
#4925=VECTOR('',#34999,1000.);
#4926=VECTOR('',#35000,1000.);
#4927=VECTOR('',#35003,1000.);
#4928=VECTOR('',#35006,1000.);
#4929=VECTOR('',#35009,1000.);
#4930=VECTOR('',#35012,1000.);
#4931=VECTOR('',#35015,1000.);
#4932=VECTOR('',#35018,1000.);
#4933=VECTOR('',#35021,1000.);
#4934=VECTOR('',#35024,1000.);
#4935=VECTOR('',#35027,1000.);
#4936=VECTOR('',#35030,1000.);
#4937=VECTOR('',#35033,1000.);
#4938=VECTOR('',#35036,1000.);
#4939=VECTOR('',#35039,1000.);
#4940=VECTOR('',#35042,1000.);
#4941=VECTOR('',#35045,1000.);
#4942=VECTOR('',#35048,1000.);
#4943=VECTOR('',#35051,1000.);
#4944=VECTOR('',#35054,1000.);
#4945=VECTOR('',#35057,1000.);
#4946=VECTOR('',#35060,1000.);
#4947=VECTOR('',#35063,1000.);
#4948=VECTOR('',#35066,1000.);
#4949=VECTOR('',#35069,1000.);
#4950=VECTOR('',#35072,1000.);
#4951=VECTOR('',#35075,1000.);
#4952=VECTOR('',#35078,1000.);
#4953=VECTOR('',#35085,1000.);
#4954=VECTOR('',#35090,1000.);
#4955=VECTOR('',#35093,1000.);
#4956=VECTOR('',#35096,1000.);
#4957=VECTOR('',#35099,1000.);
#4958=VECTOR('',#35102,1000.);
#4959=VECTOR('',#35105,1000.);
#4960=VECTOR('',#35110,1000.);
#4961=VECTOR('',#35113,1000.);
#4962=VECTOR('',#35116,1000.);
#4963=VECTOR('',#35119,1000.);
#4964=VECTOR('',#35122,1000.);
#4965=VECTOR('',#35125,1000.);
#4966=VECTOR('',#35128,1000.);
#4967=VECTOR('',#35131,1000.);
#4968=VECTOR('',#35134,1000.);
#4969=VECTOR('',#35137,1000.);
#4970=VECTOR('',#35140,1000.);
#4971=VECTOR('',#35143,1000.);
#4972=VECTOR('',#35146,1000.);
#4973=VECTOR('',#35149,1000.);
#4974=VECTOR('',#35152,1000.);
#4975=VECTOR('',#35155,1000.);
#4976=VECTOR('',#35158,1000.);
#4977=VECTOR('',#35161,1000.);
#4978=VECTOR('',#35164,1000.);
#4979=VECTOR('',#35167,1000.);
#4980=VECTOR('',#35170,1000.);
#4981=VECTOR('',#35173,1000.);
#4982=VECTOR('',#35176,1000.);
#4983=VECTOR('',#35179,1000.);
#4984=VECTOR('',#35182,1000.);
#4985=VECTOR('',#35185,1000.);
#4986=VECTOR('',#35188,1000.);
#4987=VECTOR('',#35191,1000.);
#4988=VECTOR('',#35194,1000.);
#4989=VECTOR('',#35197,1000.);
#4990=VECTOR('',#35200,1000.);
#4991=VECTOR('',#35203,1000.);
#4992=VECTOR('',#35206,1000.);
#4993=VECTOR('',#35209,1000.);
#4994=VECTOR('',#35212,1000.);
#4995=VECTOR('',#35215,1000.);
#4996=VECTOR('',#35218,1000.);
#4997=VECTOR('',#35221,1000.);
#4998=VECTOR('',#35224,1000.);
#4999=VECTOR('',#35227,1000.);
#5000=VECTOR('',#35230,1000.);
#5001=VECTOR('',#35233,1000.);
#5002=VECTOR('',#35236,1000.);
#5003=VECTOR('',#35239,1000.);
#5004=VECTOR('',#35242,1000.);
#5005=VECTOR('',#35245,1000.);
#5006=VECTOR('',#35248,1000.);
#5007=VECTOR('',#35251,1000.);
#5008=VECTOR('',#35254,1000.);
#5009=VECTOR('',#35257,1000.);
#5010=VECTOR('',#35260,1000.);
#5011=VECTOR('',#35263,1000.);
#5012=VECTOR('',#35266,1000.);
#5013=VECTOR('',#35269,1000.);
#5014=VECTOR('',#35272,1000.);
#5015=VECTOR('',#35275,1000.);
#5016=VECTOR('',#35276,1000.);
#5017=VECTOR('',#35279,1000.);
#5018=VECTOR('',#35282,1000.);
#5019=VECTOR('',#35287,1000.);
#5020=VECTOR('',#35290,1000.);
#5021=VECTOR('',#35293,1000.);
#5022=VECTOR('',#35296,1000.);
#5023=VECTOR('',#35301,1000.);
#5024=VECTOR('',#35304,1000.);
#5025=VECTOR('',#35307,1000.);
#5026=VECTOR('',#35310,1000.);
#5027=VECTOR('',#35313,1000.);
#5028=VECTOR('',#35316,1000.);
#5029=VECTOR('',#35319,1000.);
#5030=VECTOR('',#35322,1000.);
#5031=VECTOR('',#35325,1000.);
#5032=VECTOR('',#35328,1000.);
#5033=VECTOR('',#35331,1000.);
#5034=VECTOR('',#35334,1000.);
#5035=VECTOR('',#35337,1000.);
#5036=VECTOR('',#35340,1000.);
#5037=VECTOR('',#35343,1000.);
#5038=VECTOR('',#35346,1000.);
#5039=VECTOR('',#35349,1000.);
#5040=VECTOR('',#35352,1000.);
#5041=VECTOR('',#35355,1000.);
#5042=VECTOR('',#35358,1000.);
#5043=VECTOR('',#35361,1000.);
#5044=VECTOR('',#35364,1000.);
#5045=VECTOR('',#35367,1000.);
#5046=VECTOR('',#35370,1000.);
#5047=VECTOR('',#35373,1000.);
#5048=VECTOR('',#35376,1000.);
#5049=VECTOR('',#35379,1000.);
#5050=VECTOR('',#35382,1000.);
#5051=VECTOR('',#35385,1000.);
#5052=VECTOR('',#35388,1000.);
#5053=VECTOR('',#35391,1000.);
#5054=VECTOR('',#35394,1000.);
#5055=VECTOR('',#35397,1000.);
#5056=VECTOR('',#35400,1000.);
#5057=VECTOR('',#35403,1000.);
#5058=VECTOR('',#35406,1000.);
#5059=VECTOR('',#35409,1000.);
#5060=VECTOR('',#35412,1000.);
#5061=VECTOR('',#35415,1000.);
#5062=VECTOR('',#35418,1000.);
#5063=VECTOR('',#35421,1000.);
#5064=VECTOR('',#35424,1000.);
#5065=VECTOR('',#35427,1000.);
#5066=VECTOR('',#35430,1000.);
#5067=VECTOR('',#35433,1000.);
#5068=VECTOR('',#35436,1000.);
#5069=VECTOR('',#35439,1000.);
#5070=VECTOR('',#35442,1000.);
#5071=VECTOR('',#35445,1000.);
#5072=VECTOR('',#35448,1000.);
#5073=VECTOR('',#35451,1000.);
#5074=VECTOR('',#35454,1000.);
#5075=VECTOR('',#35457,1000.);
#5076=VECTOR('',#35460,1000.);
#5077=VECTOR('',#35463,1000.);
#5078=VECTOR('',#35464,1000.);
#5079=VECTOR('',#35467,1000.);
#5080=VECTOR('',#35470,1000.);
#5081=VECTOR('',#35475,1000.);
#5082=VECTOR('',#35478,1000.);
#5083=VECTOR('',#35481,1000.);
#5084=VECTOR('',#35484,1000.);
#5085=VECTOR('',#35487,1000.);
#5086=VECTOR('',#35490,1000.);
#5087=VECTOR('',#35493,1000.);
#5088=VECTOR('',#35496,1000.);
#5089=VECTOR('',#35499,1000.);
#5090=VECTOR('',#35502,1000.);
#5091=VECTOR('',#35505,1000.);
#5092=VECTOR('',#35508,1000.);
#5093=VECTOR('',#35511,1000.);
#5094=VECTOR('',#35514,1000.);
#5095=VECTOR('',#35517,1000.);
#5096=VECTOR('',#35520,1000.);
#5097=VECTOR('',#35521,1000.);
#5098=VECTOR('',#35524,1000.);
#5099=VECTOR('',#35527,1000.);
#5100=VECTOR('',#35530,1000.);
#5101=VECTOR('',#35533,1000.);
#5102=VECTOR('',#35536,1000.);
#5103=VECTOR('',#35539,1000.);
#5104=VECTOR('',#35542,1000.);
#5105=VECTOR('',#35545,1000.);
#5106=VECTOR('',#35548,1000.);
#5107=VECTOR('',#35551,1000.);
#5108=VECTOR('',#35554,1000.);
#5109=VECTOR('',#35557,1000.);
#5110=VECTOR('',#35560,1000.);
#5111=VECTOR('',#35563,1000.);
#5112=VECTOR('',#35566,1000.);
#5113=VECTOR('',#35569,1000.);
#5114=VECTOR('',#35572,1000.);
#5115=VECTOR('',#35575,1000.);
#5116=VECTOR('',#35578,1000.);
#5117=VECTOR('',#35581,1000.);
#5118=VECTOR('',#35584,1000.);
#5119=VECTOR('',#35587,1000.);
#5120=VECTOR('',#35590,1000.);
#5121=VECTOR('',#35593,1000.);
#5122=VECTOR('',#35596,1000.);
#5123=VECTOR('',#35599,1000.);
#5124=VECTOR('',#35606,1000.);
#5125=VECTOR('',#35611,1000.);
#5126=VECTOR('',#35614,1000.);
#5127=VECTOR('',#35617,1000.);
#5128=VECTOR('',#35620,1000.);
#5129=VECTOR('',#35623,1000.);
#5130=VECTOR('',#35626,1000.);
#5131=VECTOR('',#35631,1000.);
#5132=VECTOR('',#35634,1000.);
#5133=VECTOR('',#35637,1000.);
#5134=VECTOR('',#35640,1000.);
#5135=VECTOR('',#35643,1000.);
#5136=VECTOR('',#35646,1000.);
#5137=VECTOR('',#35649,1000.);
#5138=VECTOR('',#35652,1000.);
#5139=VECTOR('',#35655,1000.);
#5140=VECTOR('',#35658,1000.);
#5141=VECTOR('',#35661,1000.);
#5142=VECTOR('',#35664,1000.);
#5143=VECTOR('',#35667,1000.);
#5144=VECTOR('',#35670,1000.);
#5145=VECTOR('',#35673,1000.);
#5146=VECTOR('',#35676,1000.);
#5147=VECTOR('',#35679,1000.);
#5148=VECTOR('',#35682,1000.);
#5149=VECTOR('',#35685,1000.);
#5150=VECTOR('',#35688,1000.);
#5151=VECTOR('',#35691,1000.);
#5152=VECTOR('',#35694,1000.);
#5153=VECTOR('',#35697,1000.);
#5154=VECTOR('',#35700,1000.);
#5155=VECTOR('',#35703,1000.);
#5156=VECTOR('',#35706,1000.);
#5157=VECTOR('',#35709,1000.);
#5158=VECTOR('',#35712,1000.);
#5159=VECTOR('',#35715,1000.);
#5160=VECTOR('',#35718,1000.);
#5161=VECTOR('',#35721,1000.);
#5162=VECTOR('',#35724,1000.);
#5163=VECTOR('',#35727,1000.);
#5164=VECTOR('',#35730,1000.);
#5165=VECTOR('',#35733,1000.);
#5166=VECTOR('',#35736,1000.);
#5167=VECTOR('',#35739,1000.);
#5168=VECTOR('',#35742,1000.);
#5169=VECTOR('',#35745,1000.);
#5170=VECTOR('',#35748,1000.);
#5171=VECTOR('',#35751,1000.);
#5172=VECTOR('',#35754,1000.);
#5173=VECTOR('',#35757,1000.);
#5174=VECTOR('',#35760,1000.);
#5175=VECTOR('',#35763,1000.);
#5176=VECTOR('',#35766,1000.);
#5177=VECTOR('',#35769,1000.);
#5178=VECTOR('',#35772,1000.);
#5179=VECTOR('',#35775,1000.);
#5180=VECTOR('',#35778,1000.);
#5181=VECTOR('',#35781,1000.);
#5182=VECTOR('',#35784,1000.);
#5183=VECTOR('',#35787,1000.);
#5184=VECTOR('',#35790,1000.);
#5185=VECTOR('',#35793,1000.);
#5186=VECTOR('',#35796,1000.);
#5187=VECTOR('',#35797,1000.);
#5188=VECTOR('',#35800,1000.);
#5189=VECTOR('',#35803,1000.);
#5190=VECTOR('',#35808,1000.);
#5191=VECTOR('',#35811,1000.);
#5192=VECTOR('',#35814,1000.);
#5193=VECTOR('',#35817,1000.);
#5194=VECTOR('',#35822,1000.);
#5195=VECTOR('',#35825,1000.);
#5196=VECTOR('',#35828,1000.);
#5197=VECTOR('',#35831,1000.);
#5198=VECTOR('',#35834,1000.);
#5199=VECTOR('',#35837,1000.);
#5200=VECTOR('',#35840,1000.);
#5201=VECTOR('',#35843,1000.);
#5202=VECTOR('',#35846,1000.);
#5203=VECTOR('',#35849,1000.);
#5204=VECTOR('',#35852,1000.);
#5205=VECTOR('',#35855,1000.);
#5206=VECTOR('',#35858,1000.);
#5207=VECTOR('',#35861,1000.);
#5208=VECTOR('',#35864,1000.);
#5209=VECTOR('',#35867,1000.);
#5210=VECTOR('',#35870,1000.);
#5211=VECTOR('',#35873,1000.);
#5212=VECTOR('',#35876,1000.);
#5213=VECTOR('',#35879,1000.);
#5214=VECTOR('',#35882,1000.);
#5215=VECTOR('',#35885,1000.);
#5216=VECTOR('',#35888,1000.);
#5217=VECTOR('',#35891,1000.);
#5218=VECTOR('',#35894,1000.);
#5219=VECTOR('',#35897,1000.);
#5220=VECTOR('',#35900,1000.);
#5221=VECTOR('',#35903,1000.);
#5222=VECTOR('',#35906,1000.);
#5223=VECTOR('',#35909,1000.);
#5224=VECTOR('',#35912,1000.);
#5225=VECTOR('',#35915,1000.);
#5226=VECTOR('',#35918,1000.);
#5227=VECTOR('',#35921,1000.);
#5228=VECTOR('',#35924,1000.);
#5229=VECTOR('',#35927,1000.);
#5230=VECTOR('',#35930,1000.);
#5231=VECTOR('',#35933,1000.);
#5232=VECTOR('',#35936,1000.);
#5233=VECTOR('',#35939,1000.);
#5234=VECTOR('',#35942,1000.);
#5235=VECTOR('',#35945,1000.);
#5236=VECTOR('',#35948,1000.);
#5237=VECTOR('',#35951,1000.);
#5238=VECTOR('',#35954,1000.);
#5239=VECTOR('',#35957,1000.);
#5240=VECTOR('',#35960,1000.);
#5241=VECTOR('',#35963,1000.);
#5242=VECTOR('',#35966,1000.);
#5243=VECTOR('',#35969,1000.);
#5244=VECTOR('',#35972,1000.);
#5245=VECTOR('',#35975,1000.);
#5246=VECTOR('',#35978,1000.);
#5247=VECTOR('',#35981,1000.);
#5248=VECTOR('',#35984,1000.);
#5249=VECTOR('',#35985,1000.);
#5250=VECTOR('',#35988,1000.);
#5251=VECTOR('',#35991,1000.);
#5252=VECTOR('',#35994,1000.);
#5253=VECTOR('',#35997,1000.);
#5254=VECTOR('',#36000,1000.);
#5255=VECTOR('',#36003,1000.);
#5256=VECTOR('',#36006,1000.);
#5257=VECTOR('',#36009,1000.);
#5258=VECTOR('',#36012,1000.);
#5259=VECTOR('',#36015,1000.);
#5260=VECTOR('',#36018,1000.);
#5261=VECTOR('',#36021,1000.);
#5262=VECTOR('',#36024,1000.);
#5263=VECTOR('',#36027,1000.);
#5264=VECTOR('',#36030,1000.);
#5265=VECTOR('',#36033,1000.);
#5266=VECTOR('',#36036,1000.);
#5267=VECTOR('',#36039,1000.);
#5268=VECTOR('',#36042,1000.);
#5269=VECTOR('',#36045,1000.);
#5270=VECTOR('',#36048,1000.);
#5271=VECTOR('',#36051,1000.);
#5272=VECTOR('',#36054,1000.);
#5273=VECTOR('',#36057,1000.);
#5274=VECTOR('',#36060,1000.);
#5275=VECTOR('',#36063,1000.);
#5276=VECTOR('',#36068,1000.);
#5277=VECTOR('',#36071,1000.);
#5278=VECTOR('',#36074,1000.);
#5279=VECTOR('',#36077,1000.);
#5280=VECTOR('',#36080,1000.);
#5281=VECTOR('',#36083,1000.);
#5282=VECTOR('',#36088,1000.);
#5283=VECTOR('',#36091,1000.);
#5284=VECTOR('',#36094,1000.);
#5285=VECTOR('',#36097,1000.);
#5286=VECTOR('',#36100,1000.);
#5287=VECTOR('',#36103,1000.);
#5288=VECTOR('',#36106,1000.);
#5289=VECTOR('',#36109,1000.);
#5290=VECTOR('',#36112,1000.);
#5291=VECTOR('',#36115,1000.);
#5292=VECTOR('',#36118,1000.);
#5293=VECTOR('',#36121,1000.);
#5294=VECTOR('',#36124,1000.);
#5295=VECTOR('',#36127,1000.);
#5296=VECTOR('',#36130,1000.);
#5297=VECTOR('',#36133,1000.);
#5298=VECTOR('',#36136,1000.);
#5299=VECTOR('',#36139,1000.);
#5300=VECTOR('',#36142,1000.);
#5301=VECTOR('',#36145,1000.);
#5302=VECTOR('',#36148,1000.);
#5303=VECTOR('',#36151,1000.);
#5304=VECTOR('',#36154,1000.);
#5305=VECTOR('',#36157,1000.);
#5306=VECTOR('',#36160,1000.);
#5307=VECTOR('',#36163,1000.);
#5308=VECTOR('',#36166,1000.);
#5309=VECTOR('',#36169,1000.);
#5310=VECTOR('',#36172,1000.);
#5311=VECTOR('',#36175,1000.);
#5312=VECTOR('',#36178,1000.);
#5313=VECTOR('',#36181,1000.);
#5314=VECTOR('',#36184,1000.);
#5315=VECTOR('',#36187,1000.);
#5316=VECTOR('',#36190,1000.);
#5317=VECTOR('',#36193,1000.);
#5318=VECTOR('',#36196,1000.);
#5319=VECTOR('',#36199,1000.);
#5320=VECTOR('',#36202,1000.);
#5321=VECTOR('',#36205,1000.);
#5322=VECTOR('',#36208,1000.);
#5323=VECTOR('',#36211,1000.);
#5324=VECTOR('',#36214,1000.);
#5325=VECTOR('',#36217,1000.);
#5326=VECTOR('',#36220,1000.);
#5327=VECTOR('',#36223,1000.);
#5328=VECTOR('',#36226,1000.);
#5329=VECTOR('',#36229,1000.);
#5330=VECTOR('',#36232,1000.);
#5331=VECTOR('',#36235,1000.);
#5332=VECTOR('',#36238,1000.);
#5333=VECTOR('',#36241,1000.);
#5334=VECTOR('',#36244,1000.);
#5335=VECTOR('',#36247,1000.);
#5336=VECTOR('',#36250,1000.);
#5337=VECTOR('',#36253,1000.);
#5338=VECTOR('',#36254,1000.);
#5339=VECTOR('',#36257,1000.);
#5340=VECTOR('',#36260,1000.);
#5341=VECTOR('',#36265,1000.);
#5342=VECTOR('',#36268,1000.);
#5343=VECTOR('',#36271,1000.);
#5344=VECTOR('',#36274,1000.);
#5345=VECTOR('',#36279,1000.);
#5346=VECTOR('',#36282,1000.);
#5347=VECTOR('',#36285,1000.);
#5348=VECTOR('',#36288,1000.);
#5349=VECTOR('',#36291,1000.);
#5350=VECTOR('',#36294,1000.);
#5351=VECTOR('',#36297,1000.);
#5352=VECTOR('',#36300,1000.);
#5353=VECTOR('',#36303,1000.);
#5354=VECTOR('',#36306,1000.);
#5355=VECTOR('',#36309,1000.);
#5356=VECTOR('',#36312,1000.);
#5357=VECTOR('',#36315,1000.);
#5358=VECTOR('',#36318,1000.);
#5359=VECTOR('',#36321,1000.);
#5360=VECTOR('',#36324,1000.);
#5361=VECTOR('',#36327,1000.);
#5362=VECTOR('',#36330,1000.);
#5363=VECTOR('',#36333,1000.);
#5364=VECTOR('',#36336,1000.);
#5365=VECTOR('',#36339,1000.);
#5366=VECTOR('',#36342,1000.);
#5367=VECTOR('',#36345,1000.);
#5368=VECTOR('',#36348,1000.);
#5369=VECTOR('',#36351,1000.);
#5370=VECTOR('',#36354,1000.);
#5371=VECTOR('',#36357,1000.);
#5372=VECTOR('',#36360,1000.);
#5373=VECTOR('',#36363,1000.);
#5374=VECTOR('',#36366,1000.);
#5375=VECTOR('',#36369,1000.);
#5376=VECTOR('',#36372,1000.);
#5377=VECTOR('',#36375,1000.);
#5378=VECTOR('',#36378,1000.);
#5379=VECTOR('',#36381,1000.);
#5380=VECTOR('',#36384,1000.);
#5381=VECTOR('',#36387,1000.);
#5382=VECTOR('',#36390,1000.);
#5383=VECTOR('',#36393,1000.);
#5384=VECTOR('',#36396,1000.);
#5385=VECTOR('',#36399,1000.);
#5386=VECTOR('',#36402,1000.);
#5387=VECTOR('',#36405,1000.);
#5388=VECTOR('',#36408,1000.);
#5389=VECTOR('',#36411,1000.);
#5390=VECTOR('',#36414,1000.);
#5391=VECTOR('',#36417,1000.);
#5392=VECTOR('',#36420,1000.);
#5393=VECTOR('',#36423,1000.);
#5394=VECTOR('',#36426,1000.);
#5395=VECTOR('',#36429,1000.);
#5396=VECTOR('',#36432,1000.);
#5397=VECTOR('',#36435,1000.);
#5398=VECTOR('',#36438,1000.);
#5399=VECTOR('',#36441,1000.);
#5400=VECTOR('',#36442,1000.);
#5401=VECTOR('',#36445,1000.);
#5402=VECTOR('',#36448,1000.);
#5403=VECTOR('',#36453,1000.);
#5404=VECTOR('',#36456,1000.);
#5405=VECTOR('',#36459,1000.);
#5406=VECTOR('',#36462,1000.);
#5407=VECTOR('',#36465,1000.);
#5408=VECTOR('',#36468,1000.);
#5409=VECTOR('',#36471,1000.);
#5410=VECTOR('',#36474,1000.);
#5411=VECTOR('',#36477,1000.);
#5412=VECTOR('',#36480,1000.);
#5413=VECTOR('',#36483,1000.);
#5414=VECTOR('',#36486,1000.);
#5415=VECTOR('',#36489,1000.);
#5416=VECTOR('',#36492,1000.);
#5417=VECTOR('',#36495,1000.);
#5418=VECTOR('',#36498,1000.);
#5419=VECTOR('',#36501,1000.);
#5420=VECTOR('',#36504,1000.);
#5421=VECTOR('',#36507,1000.);
#5422=VECTOR('',#36510,1000.);
#5423=VECTOR('',#36515,1000.);
#5424=VECTOR('',#36518,1000.);
#5425=VECTOR('',#36521,1000.);
#5426=VECTOR('',#36524,1000.);
#5427=VECTOR('',#36533,1000.);
#5428=VECTOR('',#36536,1000.);
#5429=VECTOR('',#36539,1000.);
#5430=VECTOR('',#36542,1000.);
#5431=VECTOR('',#36543,1000.);
#5432=VECTOR('',#36546,1000.);
#5433=VECTOR('',#36549,1000.);
#5434=VECTOR('',#36552,1000.);
#5435=VECTOR('',#36555,1000.);
#5436=VECTOR('',#36558,1000.);
#5437=VECTOR('',#36561,1000.);
#5438=VECTOR('',#36564,1000.);
#5439=VECTOR('',#36567,1000.);
#5440=VECTOR('',#36570,1000.);
#5441=VECTOR('',#36573,1000.);
#5442=VECTOR('',#36576,1000.);
#5443=VECTOR('',#36579,1000.);
#5444=VECTOR('',#36582,1000.);
#5445=VECTOR('',#36585,1000.);
#5446=VECTOR('',#36588,1000.);
#5447=VECTOR('',#36591,1000.);
#5448=VECTOR('',#36594,1000.);
#5449=VECTOR('',#36597,1000.);
#5450=VECTOR('',#36600,1000.);
#5451=VECTOR('',#36603,1000.);
#5452=VECTOR('',#36606,1000.);
#5453=VECTOR('',#36609,1000.);
#5454=VECTOR('',#36612,1000.);
#5455=VECTOR('',#36615,1000.);
#5456=VECTOR('',#36618,1000.);
#5457=VECTOR('',#36621,1000.);
#5458=VECTOR('',#36624,1000.);
#5459=VECTOR('',#36627,1000.);
#5460=VECTOR('',#36630,1000.);
#5461=VECTOR('',#36633,1000.);
#5462=VECTOR('',#36636,1000.);
#5463=VECTOR('',#36639,1000.);
#5464=VECTOR('',#36642,1000.);
#5465=VECTOR('',#36645,1000.);
#5466=VECTOR('',#36648,1000.);
#5467=VECTOR('',#36651,1000.);
#5468=VECTOR('',#36654,1000.);
#5469=VECTOR('',#36657,1000.);
#5470=VECTOR('',#36660,1000.);
#5471=VECTOR('',#36665,1000.);
#5472=VECTOR('',#36666,1000.);
#5473=VECTOR('',#36669,1000.);
#5474=VECTOR('',#36672,1000.);
#5475=VECTOR('',#36673,1000.);
#5476=VECTOR('',#36676,1000.);
#5477=VECTOR('',#36677,1000.);
#5478=VECTOR('',#36680,1000.);
#5479=VECTOR('',#36683,1000.);
#5480=VECTOR('',#36688,1000.);
#5481=VECTOR('',#36689,1000.);
#5482=VECTOR('',#36692,1000.);
#5483=VECTOR('',#36695,10.);
#5484=VECTOR('',#36698,1000.);
#5485=VECTOR('',#36699,1000.);
#5486=VECTOR('',#36702,1000.);
#5487=VECTOR('',#36703,1000.);
#5488=VECTOR('',#36706,1000.);
#5489=VECTOR('',#36709,1000.);
#5490=VECTOR('',#36714,1000.);
#5491=VECTOR('',#36715,1000.);
#5492=VECTOR('',#36718,1000.);
#5493=VECTOR('',#36719,1000.);
#5494=VECTOR('',#36722,1000.);
#5495=VECTOR('',#36725,1000.);
#5496=VECTOR('',#36730,1000.);
#5497=VECTOR('',#36731,1000.);
#5498=VECTOR('',#36734,1000.);
#5499=VECTOR('',#36735,1000.);
#5500=VECTOR('',#36738,1000.);
#5501=VECTOR('',#36741,1000.);
#5502=VECTOR('',#36746,1000.);
#5503=VECTOR('',#36747,1000.);
#5504=VECTOR('',#36750,1000.);
#5505=VECTOR('',#36751,1000.);
#5506=VECTOR('',#36754,1000.);
#5507=VECTOR('',#36757,1000.);
#5508=VECTOR('',#36762,1000.);
#5509=VECTOR('',#36763,1000.);
#5510=VECTOR('',#36766,1000.);
#5511=VECTOR('',#36767,1000.);
#5512=VECTOR('',#36770,1000.);
#5513=VECTOR('',#36773,1000.);
#5514=VECTOR('',#36778,1000.);
#5515=VECTOR('',#36779,1000.);
#5516=VECTOR('',#36782,1000.);
#5517=VECTOR('',#36785,1000.);
#5518=VECTOR('',#36788,1000.);
#5519=VECTOR('',#36791,1000.);
#5520=VECTOR('',#36794,1000.);
#5521=VECTOR('',#36795,1000.);
#5522=VECTOR('',#36798,1000.);
#5523=VECTOR('',#36801,1000.);
#5524=VECTOR('',#36804,1000.);
#5525=VECTOR('',#36807,1000.);
#5526=VECTOR('',#36810,1000.);
#5527=VECTOR('',#36813,1000.);
#5528=VECTOR('',#36818,1000.);
#5529=VECTOR('',#36819,1000.);
#5530=VECTOR('',#36822,1000.);
#5531=VECTOR('',#36825,1000.);
#5532=VECTOR('',#36828,1000.);
#5533=VECTOR('',#36831,1000.);
#5534=VECTOR('',#36834,1000.);
#5535=VECTOR('',#36837,1000.);
#5536=VECTOR('',#36842,1000.);
#5537=VECTOR('',#36843,1000.);
#5538=VECTOR('',#36846,1000.);
#5539=VECTOR('',#36849,1000.);
#5540=VECTOR('',#36852,1000.);
#5541=VECTOR('',#36855,1000.);
#5542=VECTOR('',#36858,1000.);
#5543=VECTOR('',#36859,1000.);
#5544=VECTOR('',#36862,1000.);
#5545=VECTOR('',#36865,1000.);
#5546=VECTOR('',#36868,1000.);
#5547=VECTOR('',#36871,1000.);
#5548=VECTOR('',#36874,1000.);
#5549=VECTOR('',#36877,1000.);
#5550=VECTOR('',#36882,1000.);
#5551=VECTOR('',#36883,1000.);
#5552=VECTOR('',#36886,1000.);
#5553=VECTOR('',#36889,1000.);
#5554=VECTOR('',#36892,1000.);
#5555=VECTOR('',#36895,1000.);
#5556=VECTOR('',#36898,1000.);
#5557=VECTOR('',#36901,1000.);
#5558=VECTOR('',#36906,1000.);
#5559=VECTOR('',#36907,1000.);
#5560=VECTOR('',#36910,1000.);
#5561=VECTOR('',#36913,1000.);
#5562=VECTOR('',#36916,1000.);
#5563=VECTOR('',#36919,1000.);
#5564=VECTOR('',#36922,1000.);
#5565=VECTOR('',#36925,1000.);
#5566=VECTOR('',#36930,1000.);
#5567=VECTOR('',#36931,1000.);
#5568=VECTOR('',#36934,1000.);
#5569=VECTOR('',#36937,1000.);
#5570=VECTOR('',#36940,1000.);
#5571=VECTOR('',#36943,1000.);
#5572=VECTOR('',#36946,1000.);
#5573=VECTOR('',#36947,1000.);
#5574=VECTOR('',#36950,1000.);
#5575=VECTOR('',#36953,1000.);
#5576=VECTOR('',#36956,1000.);
#5577=VECTOR('',#36959,1000.);
#5578=VECTOR('',#36962,1000.);
#5579=VECTOR('',#36965,1000.);
#5580=VECTOR('',#36970,1000.);
#5581=VECTOR('',#36971,1000.);
#5582=VECTOR('',#36974,1000.);
#5583=VECTOR('',#36977,1000.);
#5584=VECTOR('',#36980,1000.);
#5585=VECTOR('',#36983,1000.);
#5586=VECTOR('',#36986,1000.);
#5587=VECTOR('',#36989,1000.);
#5588=VECTOR('',#36994,1000.);
#5589=VECTOR('',#36995,1000.);
#5590=VECTOR('',#36998,1000.);
#5591=VECTOR('',#37001,1000.);
#5592=VECTOR('',#37004,1000.);
#5593=VECTOR('',#37007,1000.);
#5594=VECTOR('',#37010,1000.);
#5595=VECTOR('',#37011,1000.);
#5596=VECTOR('',#37014,1000.);
#5597=VECTOR('',#37017,1000.);
#5598=VECTOR('',#37020,1000.);
#5599=VECTOR('',#37023,1000.);
#5600=VECTOR('',#37026,1000.);
#5601=VECTOR('',#37029,1000.);
#5602=VECTOR('',#37034,1000.);
#5603=VECTOR('',#37035,1000.);
#5604=VECTOR('',#37038,1000.);
#5605=VECTOR('',#37041,1000.);
#5606=VECTOR('',#37044,1000.);
#5607=VECTOR('',#37047,1000.);
#5608=VECTOR('',#37050,1000.);
#5609=VECTOR('',#37053,1000.);
#5610=VECTOR('',#37058,1000.);
#5611=VECTOR('',#37059,1000.);
#5612=VECTOR('',#37062,1000.);
#5613=VECTOR('',#37065,1000.);
#5614=VECTOR('',#37068,1000.);
#5615=VECTOR('',#37071,1000.);
#5616=VECTOR('',#37074,1000.);
#5617=VECTOR('',#37075,1000.);
#5618=VECTOR('',#37078,1000.);
#5619=VECTOR('',#37081,1000.);
#5620=VECTOR('',#37084,1000.);
#5621=VECTOR('',#37087,1000.);
#5622=VECTOR('',#37090,1000.);
#5623=VECTOR('',#37093,1000.);
#5624=VECTOR('',#37098,1000.);
#5625=VECTOR('',#37099,1000.);
#5626=VECTOR('',#37102,1000.);
#5627=VECTOR('',#37105,1000.);
#5628=VECTOR('',#37108,1000.);
#5629=VECTOR('',#37111,1000.);
#5630=VECTOR('',#37114,1000.);
#5631=VECTOR('',#37117,1000.);
#5632=VECTOR('',#37122,1000.);
#5633=VECTOR('',#37125,10.);
#5634=VECTOR('',#37128,1000.);
#5635=VECTOR('',#37129,1000.);
#5636=VECTOR('',#37132,1000.);
#5637=VECTOR('',#37135,1000.);
#5638=VECTOR('',#37138,1000.);
#5639=VECTOR('',#37141,1000.);
#5640=VECTOR('',#37144,1000.);
#5641=VECTOR('',#37147,1000.);
#5642=VECTOR('',#37152,1000.);
#5643=VECTOR('',#37153,1000.);
#5644=VECTOR('',#37156,1000.);
#5645=VECTOR('',#37159,1000.);
#5646=VECTOR('',#37162,1000.);
#5647=VECTOR('',#37165,1000.);
#5648=VECTOR('',#37168,1000.);
#5649=VECTOR('',#37171,1000.);
#5650=VECTOR('',#37176,1000.);
#5651=VECTOR('',#37177,1000.);
#5652=VECTOR('',#37180,1000.);
#5653=VECTOR('',#37183,1000.);
#5654=VECTOR('',#37186,1000.);
#5655=VECTOR('',#37189,1000.);
#5656=VECTOR('',#37192,1000.);
#5657=VECTOR('',#37193,1000.);
#5658=VECTOR('',#37196,1000.);
#5659=VECTOR('',#37199,1000.);
#5660=VECTOR('',#37202,1000.);
#5661=VECTOR('',#37205,1000.);
#5662=VECTOR('',#37208,1000.);
#5663=VECTOR('',#37209,1000.);
#5664=VECTOR('',#37212,1000.);
#5665=VECTOR('',#37215,1000.);
#5666=VECTOR('',#37218,1000.);
#5667=VECTOR('',#37221,1000.);
#5668=VECTOR('',#37222,1000.);
#5669=VECTOR('',#37225,1000.);
#5670=VECTOR('',#37226,1000.);
#5671=VECTOR('',#37231,1000.);
#5672=VECTOR('',#37232,1000.);
#5673=VECTOR('',#37235,1000.);
#5674=VECTOR('',#37236,1000.);
#5675=VECTOR('',#37239,1000.);
#5676=VECTOR('',#37240,1000.);
#5677=VECTOR('',#37249,1000.);
#5678=VECTOR('',#37252,1000.);
#5679=VECTOR('',#37255,1000.);
#5680=VECTOR('',#37260,1000.);
#5681=VECTOR('',#37265,1000.);
#5682=VECTOR('',#37268,1000.);
#5683=VECTOR('',#37273,1000.);
#5684=VECTOR('',#37276,1000.);
#5685=VECTOR('',#37281,1000.);
#5686=VECTOR('',#37284,1000.);
#5687=VECTOR('',#37289,1000.);
#5688=VECTOR('',#37292,1000.);
#5689=VECTOR('',#37297,1000.);
#5690=VECTOR('',#37300,1000.);
#5691=VECTOR('',#37305,1000.);
#5692=VECTOR('',#37306,1000.);
#5693=VECTOR('',#37309,1000.);
#5694=VECTOR('',#37312,1000.);
#5695=VECTOR('',#37315,1000.);
#5696=VECTOR('',#37318,1000.);
#5697=VECTOR('',#37321,1000.);
#5698=VECTOR('',#37322,1000.);
#5699=VECTOR('',#37325,1000.);
#5700=VECTOR('',#37328,1000.);
#5701=VECTOR('',#37331,1000.);
#5702=VECTOR('',#37334,1000.);
#5703=VECTOR('',#37337,1000.);
#5704=VECTOR('',#37340,1000.);
#5705=VECTOR('',#37345,1000.);
#5706=VECTOR('',#37346,1000.);
#5707=VECTOR('',#37349,1000.);
#5708=VECTOR('',#37352,1000.);
#5709=VECTOR('',#37355,1000.);
#5710=VECTOR('',#37358,1000.);
#5711=VECTOR('',#37361,1000.);
#5712=VECTOR('',#37364,1000.);
#5713=VECTOR('',#37369,1000.);
#5714=VECTOR('',#37370,1000.);
#5715=VECTOR('',#37373,1000.);
#5716=VECTOR('',#37376,1000.);
#5717=VECTOR('',#37379,1000.);
#5718=VECTOR('',#37382,1000.);
#5719=VECTOR('',#37385,1000.);
#5720=VECTOR('',#37386,1000.);
#5721=VECTOR('',#37389,1000.);
#5722=VECTOR('',#37392,1000.);
#5723=VECTOR('',#37395,1000.);
#5724=VECTOR('',#37398,1000.);
#5725=VECTOR('',#37401,1000.);
#5726=VECTOR('',#37404,1000.);
#5727=VECTOR('',#37409,1000.);
#5728=VECTOR('',#37410,1000.);
#5729=VECTOR('',#37413,1000.);
#5730=VECTOR('',#37416,1000.);
#5731=VECTOR('',#37419,1000.);
#5732=VECTOR('',#37422,1000.);
#5733=VECTOR('',#37425,1000.);
#5734=VECTOR('',#37428,1000.);
#5735=VECTOR('',#37433,1000.);
#5736=VECTOR('',#37434,1000.);
#5737=VECTOR('',#37437,1000.);
#5738=VECTOR('',#37440,1000.);
#5739=VECTOR('',#37443,1000.);
#5740=VECTOR('',#37446,1000.);
#5741=VECTOR('',#37449,1000.);
#5742=VECTOR('',#37452,1000.);
#5743=VECTOR('',#37457,1000.);
#5744=VECTOR('',#37458,1000.);
#5745=VECTOR('',#37461,1000.);
#5746=VECTOR('',#37464,1000.);
#5747=VECTOR('',#37467,1000.);
#5748=VECTOR('',#37470,1000.);
#5749=VECTOR('',#37473,1000.);
#5750=VECTOR('',#37474,1000.);
#5751=VECTOR('',#37477,1000.);
#5752=VECTOR('',#37480,1000.);
#5753=VECTOR('',#37483,1000.);
#5754=VECTOR('',#37486,1000.);
#5755=VECTOR('',#37489,1000.);
#5756=VECTOR('',#37492,1000.);
#5757=VECTOR('',#37497,1000.);
#5758=VECTOR('',#37498,1000.);
#5759=VECTOR('',#37501,1000.);
#5760=VECTOR('',#37504,1000.);
#5761=VECTOR('',#37507,1000.);
#5762=VECTOR('',#37510,1000.);
#5763=VECTOR('',#37513,1000.);
#5764=VECTOR('',#37516,1000.);
#5765=VECTOR('',#37521,1000.);
#5766=VECTOR('',#37522,1000.);
#5767=VECTOR('',#37525,1000.);
#5768=VECTOR('',#37528,1000.);
#5769=VECTOR('',#37531,1000.);
#5770=VECTOR('',#37534,1000.);
#5771=VECTOR('',#37537,1000.);
#5772=VECTOR('',#37538,1000.);
#5773=VECTOR('',#37541,1000.);
#5774=VECTOR('',#37544,1000.);
#5775=VECTOR('',#37547,1000.);
#5776=VECTOR('',#37550,1000.);
#5777=VECTOR('',#37553,1000.);
#5778=VECTOR('',#37556,1000.);
#5779=VECTOR('',#37561,1000.);
#5780=VECTOR('',#37562,1000.);
#5781=VECTOR('',#37565,1000.);
#5782=VECTOR('',#37568,1000.);
#5783=VECTOR('',#37571,1000.);
#5784=VECTOR('',#37574,1000.);
#5785=VECTOR('',#37577,1000.);
#5786=VECTOR('',#37580,1000.);
#5787=VECTOR('',#37585,1000.);
#5788=VECTOR('',#37586,1000.);
#5789=VECTOR('',#37589,1000.);
#5790=VECTOR('',#37592,1000.);
#5791=VECTOR('',#37595,1000.);
#5792=VECTOR('',#37598,1000.);
#5793=VECTOR('',#37601,1000.);
#5794=VECTOR('',#37602,1000.);
#5795=VECTOR('',#37605,1000.);
#5796=VECTOR('',#37608,1000.);
#5797=VECTOR('',#37611,1000.);
#5798=VECTOR('',#37614,1000.);
#5799=VECTOR('',#37617,1000.);
#5800=VECTOR('',#37620,1000.);
#5801=VECTOR('',#37625,1000.);
#5802=VECTOR('',#37626,1000.);
#5803=VECTOR('',#37629,1000.);
#5804=VECTOR('',#37632,1000.);
#5805=VECTOR('',#37635,1000.);
#5806=VECTOR('',#37638,1000.);
#5807=VECTOR('',#37641,1000.);
#5808=VECTOR('',#37644,1000.);
#5809=VECTOR('',#37649,1000.);
#5810=VECTOR('',#37652,10.);
#5811=VECTOR('',#37655,1000.);
#5812=VECTOR('',#37656,1000.);
#5813=VECTOR('',#37659,1000.);
#5814=VECTOR('',#37662,1000.);
#5815=VECTOR('',#37665,1000.);
#5816=VECTOR('',#37668,1000.);
#5817=VECTOR('',#37671,1000.);
#5818=VECTOR('',#37674,1000.);
#5819=VECTOR('',#37679,1000.);
#5820=VECTOR('',#37680,1000.);
#5821=VECTOR('',#37683,1000.);
#5822=VECTOR('',#37686,1000.);
#5823=VECTOR('',#37689,1000.);
#5824=VECTOR('',#37692,1000.);
#5825=VECTOR('',#37695,1000.);
#5826=VECTOR('',#37698,1000.);
#5827=VECTOR('',#37703,1000.);
#5828=VECTOR('',#37704,1000.);
#5829=VECTOR('',#37707,1000.);
#5830=VECTOR('',#37710,1000.);
#5831=VECTOR('',#37713,1000.);
#5832=VECTOR('',#37716,1000.);
#5833=VECTOR('',#37719,1000.);
#5834=VECTOR('',#37720,1000.);
#5835=VECTOR('',#37723,1000.);
#5836=VECTOR('',#37726,1000.);
#5837=VECTOR('',#37729,1000.);
#5838=VECTOR('',#37732,1000.);
#5839=VECTOR('',#37735,1000.);
#5840=VECTOR('',#37736,1000.);
#5841=VECTOR('',#37739,1000.);
#5842=VECTOR('',#37742,1000.);
#5843=VECTOR('',#37745,1000.);
#5844=VECTOR('',#37748,1000.);
#5845=VECTOR('',#37749,1000.);
#5846=VECTOR('',#37752,1000.);
#5847=VECTOR('',#37753,1000.);
#5848=VECTOR('',#37758,1000.);
#5849=VECTOR('',#37759,1000.);
#5850=VECTOR('',#37762,1000.);
#5851=VECTOR('',#37763,1000.);
#5852=VECTOR('',#37766,1000.);
#5853=VECTOR('',#37769,1000.);
#5854=VECTOR('',#37770,1000.);
#5855=VECTOR('',#37773,1000.);
#5856=VECTOR('',#37774,1000.);
#5857=VECTOR('',#37777,1000.);
#5858=VECTOR('',#37780,1000.);
#5859=VECTOR('',#37785,1000.);
#5860=VECTOR('',#37786,1000.);
#5861=VECTOR('',#37789,1000.);
#5862=VECTOR('',#37792,10.);
#5863=VECTOR('',#37795,1000.);
#5864=VECTOR('',#37796,1000.);
#5865=VECTOR('',#37799,1000.);
#5866=VECTOR('',#37800,1000.);
#5867=VECTOR('',#37803,1000.);
#5868=VECTOR('',#37806,1000.);
#5869=VECTOR('',#37811,1000.);
#5870=VECTOR('',#37812,1000.);
#5871=VECTOR('',#37815,1000.);
#5872=VECTOR('',#37816,1000.);
#5873=VECTOR('',#37819,1000.);
#5874=VECTOR('',#37822,1000.);
#5875=VECTOR('',#37827,1000.);
#5876=VECTOR('',#37828,1000.);
#5877=VECTOR('',#37831,1000.);
#5878=VECTOR('',#37832,1000.);
#5879=VECTOR('',#37835,1000.);
#5880=VECTOR('',#37838,1000.);
#5881=VECTOR('',#37843,1000.);
#5882=VECTOR('',#37844,1000.);
#5883=VECTOR('',#37847,1000.);
#5884=VECTOR('',#37848,1000.);
#5885=VECTOR('',#37851,1000.);
#5886=VECTOR('',#37854,1000.);
#5887=VECTOR('',#37859,1000.);
#5888=VECTOR('',#37860,1000.);
#5889=VECTOR('',#37863,1000.);
#5890=VECTOR('',#37864,1000.);
#5891=VECTOR('',#37867,1000.);
#5892=VECTOR('',#37870,1000.);
#5893=VECTOR('',#37875,1000.);
#5894=VECTOR('',#37878,1000.);
#5895=VECTOR('',#37883,1000.);
#5896=VECTOR('',#37884,1000.);
#5897=VECTOR('',#37887,1000.);
#5898=VECTOR('',#37890,1000.);
#5899=VECTOR('',#37893,1000.);
#5900=VECTOR('',#37896,1000.);
#5901=VECTOR('',#37899,1000.);
#5902=VECTOR('',#37902,1000.);
#5903=VECTOR('',#37907,1000.);
#5904=VECTOR('',#37908,1000.);
#5905=VECTOR('',#37911,1000.);
#5906=VECTOR('',#37914,1000.);
#5907=VECTOR('',#37917,1000.);
#5908=VECTOR('',#37920,1000.);
#5909=VECTOR('',#37923,1000.);
#5910=VECTOR('',#37926,1000.);
#5911=VECTOR('',#37931,1000.);
#5912=VECTOR('',#37932,1000.);
#5913=VECTOR('',#37935,1000.);
#5914=VECTOR('',#37938,1000.);
#5915=VECTOR('',#37941,1000.);
#5916=VECTOR('',#37944,1000.);
#5917=VECTOR('',#37947,1000.);
#5918=VECTOR('',#37948,1000.);
#5919=VECTOR('',#37951,1000.);
#5920=VECTOR('',#37954,1000.);
#5921=VECTOR('',#37957,1000.);
#5922=VECTOR('',#37960,1000.);
#5923=VECTOR('',#37963,1000.);
#5924=VECTOR('',#37966,1000.);
#5925=VECTOR('',#37971,1000.);
#5926=VECTOR('',#37972,1000.);
#5927=VECTOR('',#37975,1000.);
#5928=VECTOR('',#37978,1000.);
#5929=VECTOR('',#37981,1000.);
#5930=VECTOR('',#37984,1000.);
#5931=VECTOR('',#37987,1000.);
#5932=VECTOR('',#37990,1000.);
#5933=VECTOR('',#37995,1000.);
#5934=VECTOR('',#37996,1000.);
#5935=VECTOR('',#37999,1000.);
#5936=VECTOR('',#38002,1000.);
#5937=VECTOR('',#38005,1000.);
#5938=VECTOR('',#38008,1000.);
#5939=VECTOR('',#38011,1000.);
#5940=VECTOR('',#38014,1000.);
#5941=VECTOR('',#38019,1000.);
#5942=VECTOR('',#38022,1000.);
#5943=VECTOR('',#38027,1000.);
#5944=VECTOR('',#38028,1000.);
#5945=VECTOR('',#38031,1000.);
#5946=VECTOR('',#38034,1000.);
#5947=VECTOR('',#38037,1000.);
#5948=VECTOR('',#38040,1000.);
#5949=VECTOR('',#38043,1000.);
#5950=VECTOR('',#38046,1000.);
#5951=VECTOR('',#38051,1000.);
#5952=VECTOR('',#38052,1000.);
#5953=VECTOR('',#38055,1000.);
#5954=VECTOR('',#38058,1000.);
#5955=VECTOR('',#38061,1000.);
#5956=VECTOR('',#38064,1000.);
#5957=VECTOR('',#38067,1000.);
#5958=VECTOR('',#38070,1000.);
#5959=VECTOR('',#38075,1000.);
#5960=VECTOR('',#38076,1000.);
#5961=VECTOR('',#38079,1000.);
#5962=VECTOR('',#38082,1000.);
#5963=VECTOR('',#38085,1000.);
#5964=VECTOR('',#38088,1000.);
#5965=VECTOR('',#38091,1000.);
#5966=VECTOR('',#38092,1000.);
#5967=VECTOR('',#38095,1000.);
#5968=VECTOR('',#38098,1000.);
#5969=VECTOR('',#38101,1000.);
#5970=VECTOR('',#38104,1000.);
#5971=VECTOR('',#38107,1000.);
#5972=VECTOR('',#38110,1000.);
#5973=VECTOR('',#38115,1000.);
#5974=VECTOR('',#38116,1000.);
#5975=VECTOR('',#38119,1000.);
#5976=VECTOR('',#38122,1000.);
#5977=VECTOR('',#38125,1000.);
#5978=VECTOR('',#38128,1000.);
#5979=VECTOR('',#38131,1000.);
#5980=VECTOR('',#38134,1000.);
#5981=VECTOR('',#38139,1000.);
#5982=VECTOR('',#38142,1000.);
#5983=VECTOR('',#38147,1000.);
#5984=VECTOR('',#38148,1000.);
#5985=VECTOR('',#38151,1000.);
#5986=VECTOR('',#38154,1000.);
#5987=VECTOR('',#38157,1000.);
#5988=VECTOR('',#38160,1000.);
#5989=VECTOR('',#38163,1000.);
#5990=VECTOR('',#38166,1000.);
#5991=VECTOR('',#38171,1000.);
#5992=VECTOR('',#38172,1000.);
#5993=VECTOR('',#38175,1000.);
#5994=VECTOR('',#38178,1000.);
#5995=VECTOR('',#38181,1000.);
#5996=VECTOR('',#38184,1000.);
#5997=VECTOR('',#38187,1000.);
#5998=VECTOR('',#38190,1000.);
#5999=VECTOR('',#38195,1000.);
#6000=VECTOR('',#38198,10.);
#6001=VECTOR('',#38201,1000.);
#6002=VECTOR('',#38202,1000.);
#6003=VECTOR('',#38205,1000.);
#6004=VECTOR('',#38208,1000.);
#6005=VECTOR('',#38211,1000.);
#6006=VECTOR('',#38214,1000.);
#6007=VECTOR('',#38217,1000.);
#6008=VECTOR('',#38220,1000.);
#6009=VECTOR('',#38225,1000.);
#6010=VECTOR('',#38226,1000.);
#6011=VECTOR('',#38229,1000.);
#6012=VECTOR('',#38232,1000.);
#6013=VECTOR('',#38235,1000.);
#6014=VECTOR('',#38238,1000.);
#6015=VECTOR('',#38241,1000.);
#6016=VECTOR('',#38244,1000.);
#6017=VECTOR('',#38249,1000.);
#6018=VECTOR('',#38250,1000.);
#6019=VECTOR('',#38253,1000.);
#6020=VECTOR('',#38256,1000.);
#6021=VECTOR('',#38259,1000.);
#6022=VECTOR('',#38262,1000.);
#6023=VECTOR('',#38265,1000.);
#6024=VECTOR('',#38268,1000.);
#6025=VECTOR('',#38273,1000.);
#6026=VECTOR('',#38274,1000.);
#6027=VECTOR('',#38277,1000.);
#6028=VECTOR('',#38282,1000.);
#6029=VECTOR('',#38283,1000.);
#6030=VECTOR('',#38288,1000.);
#6031=VECTOR('',#38289,1000.);
#6032=VECTOR('',#38292,1000.);
#6033=VECTOR('',#38293,1000.);
#6034=VECTOR('',#38296,1000.);
#6035=VECTOR('',#38297,1000.);
#6036=VECTOR('',#38300,1000.);
#6037=VECTOR('',#38303,1000.);
#6038=VECTOR('',#38306,1000.);
#6039=VECTOR('',#38311,1000.);
#6040=VECTOR('',#38316,1000.);
#6041=VECTOR('',#38319,1000.);
#6042=VECTOR('',#38324,1000.);
#6043=VECTOR('',#38327,1000.);
#6044=VECTOR('',#38332,1000.);
#6045=VECTOR('',#38335,1000.);
#6046=VECTOR('',#38340,1000.);
#6047=VECTOR('',#38343,1000.);
#6048=VECTOR('',#38348,1000.);
#6049=VECTOR('',#38351,1000.);
#6050=VECTOR('',#38356,1000.);
#6051=VECTOR('',#38357,1000.);
#6052=VECTOR('',#38360,1000.);
#6053=VECTOR('',#38363,1000.);
#6054=VECTOR('',#38366,1000.);
#6055=VECTOR('',#38369,1000.);
#6056=VECTOR('',#38372,1000.);
#6057=VECTOR('',#38373,1000.);
#6058=VECTOR('',#38376,1000.);
#6059=VECTOR('',#38379,1000.);
#6060=VECTOR('',#38382,1000.);
#6061=VECTOR('',#38385,1000.);
#6062=VECTOR('',#38388,1000.);
#6063=VECTOR('',#38391,1000.);
#6064=VECTOR('',#38396,1000.);
#6065=VECTOR('',#38397,1000.);
#6066=VECTOR('',#38400,1000.);
#6067=VECTOR('',#38403,1000.);
#6068=VECTOR('',#38406,1000.);
#6069=VECTOR('',#38409,1000.);
#6070=VECTOR('',#38412,1000.);
#6071=VECTOR('',#38415,1000.);
#6072=VECTOR('',#38420,1000.);
#6073=VECTOR('',#38421,1000.);
#6074=VECTOR('',#38424,1000.);
#6075=VECTOR('',#38427,1000.);
#6076=VECTOR('',#38430,1000.);
#6077=VECTOR('',#38433,1000.);
#6078=VECTOR('',#38436,1000.);
#6079=VECTOR('',#38437,1000.);
#6080=VECTOR('',#38440,1000.);
#6081=VECTOR('',#38443,1000.);
#6082=VECTOR('',#38446,1000.);
#6083=VECTOR('',#38449,1000.);
#6084=VECTOR('',#38452,1000.);
#6085=VECTOR('',#38455,1000.);
#6086=VECTOR('',#38460,1000.);
#6087=VECTOR('',#38461,1000.);
#6088=VECTOR('',#38464,1000.);
#6089=VECTOR('',#38467,1000.);
#6090=VECTOR('',#38470,1000.);
#6091=VECTOR('',#38473,1000.);
#6092=VECTOR('',#38476,1000.);
#6093=VECTOR('',#38479,1000.);
#6094=VECTOR('',#38484,1000.);
#6095=VECTOR('',#38485,1000.);
#6096=VECTOR('',#38488,1000.);
#6097=VECTOR('',#38491,1000.);
#6098=VECTOR('',#38494,1000.);
#6099=VECTOR('',#38497,1000.);
#6100=VECTOR('',#38500,1000.);
#6101=VECTOR('',#38503,1000.);
#6102=VECTOR('',#38508,1000.);
#6103=VECTOR('',#38509,1000.);
#6104=VECTOR('',#38512,1000.);
#6105=VECTOR('',#38515,1000.);
#6106=VECTOR('',#38518,1000.);
#6107=VECTOR('',#38521,1000.);
#6108=VECTOR('',#38524,1000.);
#6109=VECTOR('',#38525,1000.);
#6110=VECTOR('',#38528,1000.);
#6111=VECTOR('',#38531,1000.);
#6112=VECTOR('',#38534,1000.);
#6113=VECTOR('',#38537,1000.);
#6114=VECTOR('',#38540,1000.);
#6115=VECTOR('',#38543,1000.);
#6116=VECTOR('',#38548,1000.);
#6117=VECTOR('',#38549,1000.);
#6118=VECTOR('',#38552,1000.);
#6119=VECTOR('',#38555,1000.);
#6120=VECTOR('',#38558,1000.);
#6121=VECTOR('',#38561,1000.);
#6122=VECTOR('',#38564,1000.);
#6123=VECTOR('',#38567,1000.);
#6124=VECTOR('',#38572,1000.);
#6125=VECTOR('',#38573,1000.);
#6126=VECTOR('',#38576,1000.);
#6127=VECTOR('',#38579,1000.);
#6128=VECTOR('',#38582,1000.);
#6129=VECTOR('',#38585,1000.);
#6130=VECTOR('',#38588,1000.);
#6131=VECTOR('',#38589,1000.);
#6132=VECTOR('',#38592,1000.);
#6133=VECTOR('',#38595,1000.);
#6134=VECTOR('',#38598,1000.);
#6135=VECTOR('',#38601,1000.);
#6136=VECTOR('',#38604,1000.);
#6137=VECTOR('',#38607,1000.);
#6138=VECTOR('',#38612,1000.);
#6139=VECTOR('',#38613,1000.);
#6140=VECTOR('',#38616,1000.);
#6141=VECTOR('',#38619,1000.);
#6142=VECTOR('',#38622,1000.);
#6143=VECTOR('',#38625,1000.);
#6144=VECTOR('',#38628,1000.);
#6145=VECTOR('',#38631,1000.);
#6146=VECTOR('',#38636,1000.);
#6147=VECTOR('',#38637,1000.);
#6148=VECTOR('',#38640,1000.);
#6149=VECTOR('',#38643,1000.);
#6150=VECTOR('',#38646,1000.);
#6151=VECTOR('',#38649,1000.);
#6152=VECTOR('',#38652,1000.);
#6153=VECTOR('',#38653,1000.);
#6154=VECTOR('',#38656,1000.);
#6155=VECTOR('',#38659,1000.);
#6156=VECTOR('',#38662,1000.);
#6157=VECTOR('',#38665,1000.);
#6158=VECTOR('',#38668,1000.);
#6159=VECTOR('',#38671,1000.);
#6160=VECTOR('',#38676,1000.);
#6161=VECTOR('',#38677,1000.);
#6162=VECTOR('',#38680,1000.);
#6163=VECTOR('',#38683,1000.);
#6164=VECTOR('',#38686,1000.);
#6165=VECTOR('',#38689,1000.);
#6166=VECTOR('',#38692,1000.);
#6167=VECTOR('',#38695,1000.);
#6168=VECTOR('',#38700,1000.);
#6169=VECTOR('',#38703,10.);
#6170=VECTOR('',#38706,1000.);
#6171=VECTOR('',#38707,1000.);
#6172=VECTOR('',#38710,1000.);
#6173=VECTOR('',#38713,1000.);
#6174=VECTOR('',#38716,1000.);
#6175=VECTOR('',#38719,1000.);
#6176=VECTOR('',#38722,1000.);
#6177=VECTOR('',#38725,1000.);
#6178=VECTOR('',#38730,1000.);
#6179=VECTOR('',#38731,1000.);
#6180=VECTOR('',#38734,1000.);
#6181=VECTOR('',#38737,1000.);
#6182=VECTOR('',#38740,1000.);
#6183=VECTOR('',#38743,1000.);
#6184=VECTOR('',#38746,1000.);
#6185=VECTOR('',#38749,1000.);
#6186=VECTOR('',#38754,1000.);
#6187=VECTOR('',#38755,1000.);
#6188=VECTOR('',#38758,1000.);
#6189=VECTOR('',#38761,1000.);
#6190=VECTOR('',#38764,1000.);
#6191=VECTOR('',#38767,1000.);
#6192=VECTOR('',#38770,1000.);
#6193=VECTOR('',#38771,1000.);
#6194=VECTOR('',#38774,1000.);
#6195=VECTOR('',#38777,1000.);
#6196=VECTOR('',#38780,1000.);
#6197=VECTOR('',#38783,1000.);
#6198=VECTOR('',#38786,1000.);
#6199=VECTOR('',#38787,1000.);
#6200=VECTOR('',#38790,1000.);
#6201=VECTOR('',#38793,1000.);
#6202=VECTOR('',#38796,1000.);
#6203=VECTOR('',#38799,1000.);
#6204=VECTOR('',#38800,1000.);
#6205=VECTOR('',#38803,1000.);
#6206=VECTOR('',#38804,1000.);
#6207=VECTOR('',#38809,1000.);
#6208=VECTOR('',#38810,1000.);
#6209=VECTOR('',#38813,1000.);
#6210=VECTOR('',#38814,1000.);
#6211=VECTOR('',#38817,1000.);
#6212=VECTOR('',#38820,1000.);
#6213=VECTOR('',#38821,1000.);
#6214=VECTOR('',#38824,1000.);
#6215=VECTOR('',#38825,1000.);
#6216=VECTOR('',#38828,1000.);
#6217=VECTOR('',#38831,1000.);
#6218=VECTOR('',#38836,1000.);
#6219=VECTOR('',#38837,1000.);
#6220=VECTOR('',#38840,1000.);
#6221=VECTOR('',#38843,10.);
#6222=VECTOR('',#38846,1000.);
#6223=VECTOR('',#38847,1000.);
#6224=VECTOR('',#38850,1000.);
#6225=VECTOR('',#38851,1000.);
#6226=VECTOR('',#38854,1000.);
#6227=VECTOR('',#38857,1000.);
#6228=VECTOR('',#38862,1000.);
#6229=VECTOR('',#38863,1000.);
#6230=VECTOR('',#38866,1000.);
#6231=VECTOR('',#38867,1000.);
#6232=VECTOR('',#38870,1000.);
#6233=VECTOR('',#38873,1000.);
#6234=VECTOR('',#38878,1000.);
#6235=VECTOR('',#38879,1000.);
#6236=VECTOR('',#38882,1000.);
#6237=VECTOR('',#38883,1000.);
#6238=VECTOR('',#38886,1000.);
#6239=VECTOR('',#38889,1000.);
#6240=VECTOR('',#38894,1000.);
#6241=VECTOR('',#38895,1000.);
#6242=VECTOR('',#38898,1000.);
#6243=VECTOR('',#38899,1000.);
#6244=VECTOR('',#38902,1000.);
#6245=VECTOR('',#38905,1000.);
#6246=VECTOR('',#38910,1000.);
#6247=VECTOR('',#38911,1000.);
#6248=VECTOR('',#38914,1000.);
#6249=VECTOR('',#38915,1000.);
#6250=VECTOR('',#38918,1000.);
#6251=VECTOR('',#38921,1000.);
#6252=VECTOR('',#38926,1000.);
#6253=VECTOR('',#38929,1000.);
#6254=VECTOR('',#38934,1000.);
#6255=VECTOR('',#38935,1000.);
#6256=VECTOR('',#38938,1000.);
#6257=VECTOR('',#38941,1000.);
#6258=VECTOR('',#38944,1000.);
#6259=VECTOR('',#38947,1000.);
#6260=VECTOR('',#38950,1000.);
#6261=VECTOR('',#38953,1000.);
#6262=VECTOR('',#38958,1000.);
#6263=VECTOR('',#38959,1000.);
#6264=VECTOR('',#38962,1000.);
#6265=VECTOR('',#38965,1000.);
#6266=VECTOR('',#38968,1000.);
#6267=VECTOR('',#38971,1000.);
#6268=VECTOR('',#38974,1000.);
#6269=VECTOR('',#38977,1000.);
#6270=VECTOR('',#38982,1000.);
#6271=VECTOR('',#38983,1000.);
#6272=VECTOR('',#38986,1000.);
#6273=VECTOR('',#38989,1000.);
#6274=VECTOR('',#38992,1000.);
#6275=VECTOR('',#38995,1000.);
#6276=VECTOR('',#38998,1000.);
#6277=VECTOR('',#38999,1000.);
#6278=VECTOR('',#39002,1000.);
#6279=VECTOR('',#39005,1000.);
#6280=VECTOR('',#39008,1000.);
#6281=VECTOR('',#39011,1000.);
#6282=VECTOR('',#39014,1000.);
#6283=VECTOR('',#39017,1000.);
#6284=VECTOR('',#39022,1000.);
#6285=VECTOR('',#39023,1000.);
#6286=VECTOR('',#39026,1000.);
#6287=VECTOR('',#39029,1000.);
#6288=VECTOR('',#39032,1000.);
#6289=VECTOR('',#39035,1000.);
#6290=VECTOR('',#39038,1000.);
#6291=VECTOR('',#39041,1000.);
#6292=VECTOR('',#39046,1000.);
#6293=VECTOR('',#39047,1000.);
#6294=VECTOR('',#39050,1000.);
#6295=VECTOR('',#39053,1000.);
#6296=VECTOR('',#39056,1000.);
#6297=VECTOR('',#39059,1000.);
#6298=VECTOR('',#39062,1000.);
#6299=VECTOR('',#39065,1000.);
#6300=VECTOR('',#39070,1000.);
#6301=VECTOR('',#39073,1000.);
#6302=VECTOR('',#39078,1000.);
#6303=VECTOR('',#39079,1000.);
#6304=VECTOR('',#39082,1000.);
#6305=VECTOR('',#39085,1000.);
#6306=VECTOR('',#39088,1000.);
#6307=VECTOR('',#39091,1000.);
#6308=VECTOR('',#39094,1000.);
#6309=VECTOR('',#39097,1000.);
#6310=VECTOR('',#39102,1000.);
#6311=VECTOR('',#39103,1000.);
#6312=VECTOR('',#39106,1000.);
#6313=VECTOR('',#39109,1000.);
#6314=VECTOR('',#39112,1000.);
#6315=VECTOR('',#39115,1000.);
#6316=VECTOR('',#39118,1000.);
#6317=VECTOR('',#39121,1000.);
#6318=VECTOR('',#39126,1000.);
#6319=VECTOR('',#39127,1000.);
#6320=VECTOR('',#39130,1000.);
#6321=VECTOR('',#39133,1000.);
#6322=VECTOR('',#39136,1000.);
#6323=VECTOR('',#39139,1000.);
#6324=VECTOR('',#39142,1000.);
#6325=VECTOR('',#39143,1000.);
#6326=VECTOR('',#39146,1000.);
#6327=VECTOR('',#39149,1000.);
#6328=VECTOR('',#39152,1000.);
#6329=VECTOR('',#39155,1000.);
#6330=VECTOR('',#39158,1000.);
#6331=VECTOR('',#39161,1000.);
#6332=VECTOR('',#39166,1000.);
#6333=VECTOR('',#39167,1000.);
#6334=VECTOR('',#39170,1000.);
#6335=VECTOR('',#39173,1000.);
#6336=VECTOR('',#39176,1000.);
#6337=VECTOR('',#39179,1000.);
#6338=VECTOR('',#39182,1000.);
#6339=VECTOR('',#39185,1000.);
#6340=VECTOR('',#39190,1000.);
#6341=VECTOR('',#39193,1000.);
#6342=VECTOR('',#39198,1000.);
#6343=VECTOR('',#39199,1000.);
#6344=VECTOR('',#39202,1000.);
#6345=VECTOR('',#39205,1000.);
#6346=VECTOR('',#39208,1000.);
#6347=VECTOR('',#39211,1000.);
#6348=VECTOR('',#39214,1000.);
#6349=VECTOR('',#39217,1000.);
#6350=VECTOR('',#39222,1000.);
#6351=VECTOR('',#39223,1000.);
#6352=VECTOR('',#39226,1000.);
#6353=VECTOR('',#39229,1000.);
#6354=VECTOR('',#39232,1000.);
#6355=VECTOR('',#39235,1000.);
#6356=VECTOR('',#39238,1000.);
#6357=VECTOR('',#39241,1000.);
#6358=VECTOR('',#39246,1000.);
#6359=VECTOR('',#39249,10.);
#6360=VECTOR('',#39252,1000.);
#6361=VECTOR('',#39253,1000.);
#6362=VECTOR('',#39256,1000.);
#6363=VECTOR('',#39259,1000.);
#6364=VECTOR('',#39262,1000.);
#6365=VECTOR('',#39265,1000.);
#6366=VECTOR('',#39268,1000.);
#6367=VECTOR('',#39271,1000.);
#6368=VECTOR('',#39276,1000.);
#6369=VECTOR('',#39277,1000.);
#6370=VECTOR('',#39280,1000.);
#6371=VECTOR('',#39283,1000.);
#6372=VECTOR('',#39286,1000.);
#6373=VECTOR('',#39289,1000.);
#6374=VECTOR('',#39292,1000.);
#6375=VECTOR('',#39295,1000.);
#6376=VECTOR('',#39300,1000.);
#6377=VECTOR('',#39301,1000.);
#6378=VECTOR('',#39304,1000.);
#6379=VECTOR('',#39307,1000.);
#6380=VECTOR('',#39310,1000.);
#6381=VECTOR('',#39313,1000.);
#6382=VECTOR('',#39316,1000.);
#6383=VECTOR('',#39319,1000.);
#6384=VECTOR('',#39324,1000.);
#6385=VECTOR('',#39325,1000.);
#6386=VECTOR('',#39328,1000.);
#6387=VECTOR('',#39333,1000.);
#6388=VECTOR('',#39334,1000.);
#6389=VECTOR('',#39339,1000.);
#6390=VECTOR('',#39340,1000.);
#6391=VECTOR('',#39343,1000.);
#6392=VECTOR('',#39344,1000.);
#6393=VECTOR('',#39347,1000.);
#6394=VECTOR('',#39348,1000.);
#6395=VECTOR('',#39351,1000.);
#6396=VECTOR('',#39354,1000.);
#6397=VECTOR('',#39357,1000.);
#6398=VECTOR('',#39362,1000.);
#6399=VECTOR('',#39367,1000.);
#6400=VECTOR('',#39370,1000.);
#6401=VECTOR('',#39375,1000.);
#6402=VECTOR('',#39378,1000.);
#6403=VECTOR('',#39383,1000.);
#6404=VECTOR('',#39386,1000.);
#6405=VECTOR('',#39391,1000.);
#6406=VECTOR('',#39394,1000.);
#6407=VECTOR('',#39399,1000.);
#6408=VECTOR('',#39402,1000.);
#6409=VECTOR('',#39407,1000.);
#6410=VECTOR('',#39408,1000.);
#6411=VECTOR('',#39411,1000.);
#6412=VECTOR('',#39414,1000.);
#6413=VECTOR('',#39417,1000.);
#6414=VECTOR('',#39420,1000.);
#6415=VECTOR('',#39423,1000.);
#6416=VECTOR('',#39424,1000.);
#6417=VECTOR('',#39427,1000.);
#6418=VECTOR('',#39430,1000.);
#6419=VECTOR('',#39433,1000.);
#6420=VECTOR('',#39436,1000.);
#6421=VECTOR('',#39439,1000.);
#6422=VECTOR('',#39442,1000.);
#6423=VECTOR('',#39447,1000.);
#6424=VECTOR('',#39448,1000.);
#6425=VECTOR('',#39451,1000.);
#6426=VECTOR('',#39454,1000.);
#6427=VECTOR('',#39457,1000.);
#6428=VECTOR('',#39460,1000.);
#6429=VECTOR('',#39463,1000.);
#6430=VECTOR('',#39466,1000.);
#6431=VECTOR('',#39471,1000.);
#6432=VECTOR('',#39472,1000.);
#6433=VECTOR('',#39475,1000.);
#6434=VECTOR('',#39478,1000.);
#6435=VECTOR('',#39481,1000.);
#6436=VECTOR('',#39484,1000.);
#6437=VECTOR('',#39487,1000.);
#6438=VECTOR('',#39488,1000.);
#6439=VECTOR('',#39491,1000.);
#6440=VECTOR('',#39494,1000.);
#6441=VECTOR('',#39497,1000.);
#6442=VECTOR('',#39500,1000.);
#6443=VECTOR('',#39503,1000.);
#6444=VECTOR('',#39506,1000.);
#6445=VECTOR('',#39511,1000.);
#6446=VECTOR('',#39512,1000.);
#6447=VECTOR('',#39515,1000.);
#6448=VECTOR('',#39518,1000.);
#6449=VECTOR('',#39521,1000.);
#6450=VECTOR('',#39524,1000.);
#6451=VECTOR('',#39527,1000.);
#6452=VECTOR('',#39530,1000.);
#6453=VECTOR('',#39535,1000.);
#6454=VECTOR('',#39536,1000.);
#6455=VECTOR('',#39539,1000.);
#6456=VECTOR('',#39542,1000.);
#6457=VECTOR('',#39545,1000.);
#6458=VECTOR('',#39548,1000.);
#6459=VECTOR('',#39551,1000.);
#6460=VECTOR('',#39554,1000.);
#6461=VECTOR('',#39559,1000.);
#6462=VECTOR('',#39560,1000.);
#6463=VECTOR('',#39563,1000.);
#6464=VECTOR('',#39566,1000.);
#6465=VECTOR('',#39569,1000.);
#6466=VECTOR('',#39572,1000.);
#6467=VECTOR('',#39575,1000.);
#6468=VECTOR('',#39576,1000.);
#6469=VECTOR('',#39579,1000.);
#6470=VECTOR('',#39582,1000.);
#6471=VECTOR('',#39585,1000.);
#6472=VECTOR('',#39588,1000.);
#6473=VECTOR('',#39591,1000.);
#6474=VECTOR('',#39594,1000.);
#6475=VECTOR('',#39599,1000.);
#6476=VECTOR('',#39600,1000.);
#6477=VECTOR('',#39603,1000.);
#6478=VECTOR('',#39606,1000.);
#6479=VECTOR('',#39609,1000.);
#6480=VECTOR('',#39612,1000.);
#6481=VECTOR('',#39615,1000.);
#6482=VECTOR('',#39618,1000.);
#6483=VECTOR('',#39623,1000.);
#6484=VECTOR('',#39624,1000.);
#6485=VECTOR('',#39627,1000.);
#6486=VECTOR('',#39630,1000.);
#6487=VECTOR('',#39633,1000.);
#6488=VECTOR('',#39636,1000.);
#6489=VECTOR('',#39639,1000.);
#6490=VECTOR('',#39640,1000.);
#6491=VECTOR('',#39643,1000.);
#6492=VECTOR('',#39646,1000.);
#6493=VECTOR('',#39649,1000.);
#6494=VECTOR('',#39652,1000.);
#6495=VECTOR('',#39655,1000.);
#6496=VECTOR('',#39658,1000.);
#6497=VECTOR('',#39663,1000.);
#6498=VECTOR('',#39664,1000.);
#6499=VECTOR('',#39667,1000.);
#6500=VECTOR('',#39670,1000.);
#6501=VECTOR('',#39673,1000.);
#6502=VECTOR('',#39676,1000.);
#6503=VECTOR('',#39679,1000.);
#6504=VECTOR('',#39682,1000.);
#6505=VECTOR('',#39687,1000.);
#6506=VECTOR('',#39688,1000.);
#6507=VECTOR('',#39691,1000.);
#6508=VECTOR('',#39694,1000.);
#6509=VECTOR('',#39697,1000.);
#6510=VECTOR('',#39700,1000.);
#6511=VECTOR('',#39703,1000.);
#6512=VECTOR('',#39704,1000.);
#6513=VECTOR('',#39707,1000.);
#6514=VECTOR('',#39710,1000.);
#6515=VECTOR('',#39713,1000.);
#6516=VECTOR('',#39716,1000.);
#6517=VECTOR('',#39719,1000.);
#6518=VECTOR('',#39722,1000.);
#6519=VECTOR('',#39727,1000.);
#6520=VECTOR('',#39728,1000.);
#6521=VECTOR('',#39731,1000.);
#6522=VECTOR('',#39734,1000.);
#6523=VECTOR('',#39737,1000.);
#6524=VECTOR('',#39740,1000.);
#6525=VECTOR('',#39743,1000.);
#6526=VECTOR('',#39746,1000.);
#6527=VECTOR('',#39751,1000.);
#6528=VECTOR('',#39754,10.);
#6529=VECTOR('',#39757,1000.);
#6530=VECTOR('',#39758,1000.);
#6531=VECTOR('',#39761,1000.);
#6532=VECTOR('',#39764,1000.);
#6533=VECTOR('',#39767,1000.);
#6534=VECTOR('',#39770,1000.);
#6535=VECTOR('',#39773,1000.);
#6536=VECTOR('',#39776,1000.);
#6537=VECTOR('',#39781,1000.);
#6538=VECTOR('',#39782,1000.);
#6539=VECTOR('',#39785,1000.);
#6540=VECTOR('',#39788,1000.);
#6541=VECTOR('',#39791,1000.);
#6542=VECTOR('',#39794,1000.);
#6543=VECTOR('',#39797,1000.);
#6544=VECTOR('',#39800,1000.);
#6545=VECTOR('',#39805,1000.);
#6546=VECTOR('',#39806,1000.);
#6547=VECTOR('',#39809,1000.);
#6548=VECTOR('',#39812,1000.);
#6549=VECTOR('',#39815,1000.);
#6550=VECTOR('',#39818,1000.);
#6551=VECTOR('',#39821,1000.);
#6552=VECTOR('',#39822,1000.);
#6553=VECTOR('',#39825,1000.);
#6554=VECTOR('',#39828,1000.);
#6555=VECTOR('',#39831,1000.);
#6556=VECTOR('',#39834,1000.);
#6557=VECTOR('',#39837,1000.);
#6558=VECTOR('',#39838,1000.);
#6559=VECTOR('',#39841,1000.);
#6560=VECTOR('',#39844,1000.);
#6561=VECTOR('',#39847,1000.);
#6562=VECTOR('',#39850,1000.);
#6563=VECTOR('',#39851,1000.);
#6564=VECTOR('',#39854,1000.);
#6565=VECTOR('',#39855,1000.);
#6566=VECTOR('',#39860,1000.);
#6567=VECTOR('',#39861,1000.);
#6568=VECTOR('',#39864,1000.);
#6569=VECTOR('',#39865,1000.);
#6570=VECTOR('',#39870,1000.);
#6571=VECTOR('',#39871,1000.);
#6572=VECTOR('',#39874,1000.);
#6573=VECTOR('',#39875,1000.);
#6574=VECTOR('',#39878,1000.);
#6575=VECTOR('',#39881,1000.);
#6576=VECTOR('',#39886,1000.);
#6577=VECTOR('',#39887,1000.);
#6578=VECTOR('',#39890,1000.);
#6579=VECTOR('',#39893,10.);
#6580=VECTOR('',#39896,1000.);
#6581=VECTOR('',#39897,1000.);
#6582=VECTOR('',#39900,1000.);
#6583=VECTOR('',#39901,1000.);
#6584=VECTOR('',#39904,1000.);
#6585=VECTOR('',#39907,1000.);
#6586=VECTOR('',#39912,1000.);
#6587=VECTOR('',#39913,1000.);
#6588=VECTOR('',#39916,1000.);
#6589=VECTOR('',#39917,1000.);
#6590=VECTOR('',#39920,1000.);
#6591=VECTOR('',#39923,1000.);
#6592=VECTOR('',#39928,1000.);
#6593=VECTOR('',#39929,1000.);
#6594=VECTOR('',#39932,1000.);
#6595=VECTOR('',#39933,1000.);
#6596=VECTOR('',#39936,1000.);
#6597=VECTOR('',#39939,1000.);
#6598=VECTOR('',#39944,1000.);
#6599=VECTOR('',#39945,1000.);
#6600=VECTOR('',#39948,1000.);
#6601=VECTOR('',#39949,1000.);
#6602=VECTOR('',#39952,1000.);
#6603=VECTOR('',#39955,1000.);
#6604=VECTOR('',#39960,1000.);
#6605=VECTOR('',#39961,1000.);
#6606=VECTOR('',#39964,1000.);
#6607=VECTOR('',#39965,1000.);
#6608=VECTOR('',#39968,1000.);
#6609=VECTOR('',#39971,1000.);
#6610=VECTOR('',#39976,1000.);
#6611=VECTOR('',#39979,1000.);
#6612=VECTOR('',#39984,1000.);
#6613=VECTOR('',#39985,1000.);
#6614=VECTOR('',#39988,1000.);
#6615=VECTOR('',#39991,1000.);
#6616=VECTOR('',#39994,1000.);
#6617=VECTOR('',#39997,1000.);
#6618=VECTOR('',#40000,1000.);
#6619=VECTOR('',#40003,1000.);
#6620=VECTOR('',#40008,1000.);
#6621=VECTOR('',#40009,1000.);
#6622=VECTOR('',#40012,1000.);
#6623=VECTOR('',#40015,1000.);
#6624=VECTOR('',#40018,1000.);
#6625=VECTOR('',#40021,1000.);
#6626=VECTOR('',#40024,1000.);
#6627=VECTOR('',#40027,1000.);
#6628=VECTOR('',#40032,1000.);
#6629=VECTOR('',#40033,1000.);
#6630=VECTOR('',#40036,1000.);
#6631=VECTOR('',#40039,1000.);
#6632=VECTOR('',#40042,1000.);
#6633=VECTOR('',#40045,1000.);
#6634=VECTOR('',#40048,1000.);
#6635=VECTOR('',#40049,1000.);
#6636=VECTOR('',#40052,1000.);
#6637=VECTOR('',#40055,1000.);
#6638=VECTOR('',#40058,1000.);
#6639=VECTOR('',#40061,1000.);
#6640=VECTOR('',#40064,1000.);
#6641=VECTOR('',#40067,1000.);
#6642=VECTOR('',#40072,1000.);
#6643=VECTOR('',#40073,1000.);
#6644=VECTOR('',#40076,1000.);
#6645=VECTOR('',#40079,1000.);
#6646=VECTOR('',#40082,1000.);
#6647=VECTOR('',#40085,1000.);
#6648=VECTOR('',#40088,1000.);
#6649=VECTOR('',#40091,1000.);
#6650=VECTOR('',#40096,1000.);
#6651=VECTOR('',#40097,1000.);
#6652=VECTOR('',#40100,1000.);
#6653=VECTOR('',#40103,1000.);
#6654=VECTOR('',#40106,1000.);
#6655=VECTOR('',#40109,1000.);
#6656=VECTOR('',#40112,1000.);
#6657=VECTOR('',#40115,1000.);
#6658=VECTOR('',#40120,1000.);
#6659=VECTOR('',#40123,1000.);
#6660=VECTOR('',#40128,1000.);
#6661=VECTOR('',#40129,1000.);
#6662=VECTOR('',#40132,1000.);
#6663=VECTOR('',#40135,1000.);
#6664=VECTOR('',#40138,1000.);
#6665=VECTOR('',#40141,1000.);
#6666=VECTOR('',#40144,1000.);
#6667=VECTOR('',#40147,1000.);
#6668=VECTOR('',#40152,1000.);
#6669=VECTOR('',#40153,1000.);
#6670=VECTOR('',#40156,1000.);
#6671=VECTOR('',#40159,1000.);
#6672=VECTOR('',#40162,1000.);
#6673=VECTOR('',#40165,1000.);
#6674=VECTOR('',#40168,1000.);
#6675=VECTOR('',#40171,1000.);
#6676=VECTOR('',#40176,1000.);
#6677=VECTOR('',#40177,1000.);
#6678=VECTOR('',#40180,1000.);
#6679=VECTOR('',#40183,1000.);
#6680=VECTOR('',#40186,1000.);
#6681=VECTOR('',#40189,1000.);
#6682=VECTOR('',#40192,1000.);
#6683=VECTOR('',#40193,1000.);
#6684=VECTOR('',#40196,1000.);
#6685=VECTOR('',#40199,1000.);
#6686=VECTOR('',#40202,1000.);
#6687=VECTOR('',#40205,1000.);
#6688=VECTOR('',#40208,1000.);
#6689=VECTOR('',#40211,1000.);
#6690=VECTOR('',#40216,1000.);
#6691=VECTOR('',#40217,1000.);
#6692=VECTOR('',#40220,1000.);
#6693=VECTOR('',#40223,1000.);
#6694=VECTOR('',#40226,1000.);
#6695=VECTOR('',#40229,1000.);
#6696=VECTOR('',#40232,1000.);
#6697=VECTOR('',#40235,1000.);
#6698=VECTOR('',#40240,1000.);
#6699=VECTOR('',#40243,1000.);
#6700=VECTOR('',#40248,1000.);
#6701=VECTOR('',#40249,1000.);
#6702=VECTOR('',#40252,1000.);
#6703=VECTOR('',#40255,1000.);
#6704=VECTOR('',#40258,1000.);
#6705=VECTOR('',#40261,1000.);
#6706=VECTOR('',#40264,1000.);
#6707=VECTOR('',#40267,1000.);
#6708=VECTOR('',#40272,1000.);
#6709=VECTOR('',#40273,1000.);
#6710=VECTOR('',#40276,1000.);
#6711=VECTOR('',#40279,1000.);
#6712=VECTOR('',#40282,1000.);
#6713=VECTOR('',#40285,1000.);
#6714=VECTOR('',#40288,1000.);
#6715=VECTOR('',#40291,1000.);
#6716=VECTOR('',#40296,1000.);
#6717=VECTOR('',#40299,10.);
#6718=VECTOR('',#40302,1000.);
#6719=VECTOR('',#40303,1000.);
#6720=VECTOR('',#40306,1000.);
#6721=VECTOR('',#40309,1000.);
#6722=VECTOR('',#40312,1000.);
#6723=VECTOR('',#40315,1000.);
#6724=VECTOR('',#40318,1000.);
#6725=VECTOR('',#40321,1000.);
#6726=VECTOR('',#40326,1000.);
#6727=VECTOR('',#40327,1000.);
#6728=VECTOR('',#40330,1000.);
#6729=VECTOR('',#40333,1000.);
#6730=VECTOR('',#40336,1000.);
#6731=VECTOR('',#40339,1000.);
#6732=VECTOR('',#40342,1000.);
#6733=VECTOR('',#40345,1000.);
#6734=VECTOR('',#40350,1000.);
#6735=VECTOR('',#40351,1000.);
#6736=VECTOR('',#40354,1000.);
#6737=VECTOR('',#40357,1000.);
#6738=VECTOR('',#40360,1000.);
#6739=VECTOR('',#40363,1000.);
#6740=VECTOR('',#40366,1000.);
#6741=VECTOR('',#40369,1000.);
#6742=VECTOR('',#40374,1000.);
#6743=VECTOR('',#40375,1000.);
#6744=VECTOR('',#40378,1000.);
#6745=VECTOR('',#40383,1000.);
#6746=VECTOR('',#40384,1000.);
#6747=VECTOR('',#40389,1000.);
#6748=VECTOR('',#40390,1000.);
#6749=VECTOR('',#40393,1000.);
#6750=VECTOR('',#40394,1000.);
#6751=VECTOR('',#40397,1000.);
#6752=VECTOR('',#40398,1000.);
#6753=VECTOR('',#40401,1000.);
#6754=VECTOR('',#40404,1000.);
#6755=VECTOR('',#40409,1000.);
#6756=VECTOR('',#40414,1000.);
#6757=VECTOR('',#40417,1000.);
#6758=VECTOR('',#40422,1000.);
#6759=VECTOR('',#40425,1000.);
#6760=VECTOR('',#40430,1000.);
#6761=VECTOR('',#40433,1000.);
#6762=VECTOR('',#40438,1000.);
#6763=VECTOR('',#40441,1000.);
#6764=VECTOR('',#40446,1000.);
#6765=VECTOR('',#40449,1000.);
#6766=VECTOR('',#40454,1000.);
#6767=VECTOR('',#40457,1000.);
#6768=VECTOR('',#40462,1000.);
#6769=VECTOR('',#40463,1000.);
#6770=VECTOR('',#40466,1000.);
#6771=VECTOR('',#40469,1000.);
#6772=VECTOR('',#40472,1000.);
#6773=VECTOR('',#40475,1000.);
#6774=VECTOR('',#40478,1000.);
#6775=VECTOR('',#40481,1000.);
#6776=VECTOR('',#40486,1000.);
#6777=VECTOR('',#40487,1000.);
#6778=VECTOR('',#40490,1000.);
#6779=VECTOR('',#40493,1000.);
#6780=VECTOR('',#40496,1000.);
#6781=VECTOR('',#40499,1000.);
#6782=VECTOR('',#40502,1000.);
#6783=VECTOR('',#40505,1000.);
#6784=VECTOR('',#40510,1000.);
#6785=VECTOR('',#40511,1000.);
#6786=VECTOR('',#40514,1000.);
#6787=VECTOR('',#40517,1000.);
#6788=VECTOR('',#40520,1000.);
#6789=VECTOR('',#40523,1000.);
#6790=VECTOR('',#40526,1000.);
#6791=VECTOR('',#40527,1000.);
#6792=VECTOR('',#40530,1000.);
#6793=VECTOR('',#40533,1000.);
#6794=VECTOR('',#40536,1000.);
#6795=VECTOR('',#40539,1000.);
#6796=VECTOR('',#40542,1000.);
#6797=VECTOR('',#40545,1000.);
#6798=VECTOR('',#40550,1000.);
#6799=VECTOR('',#40551,1000.);
#6800=VECTOR('',#40554,1000.);
#6801=VECTOR('',#40557,1000.);
#6802=VECTOR('',#40560,1000.);
#6803=VECTOR('',#40563,1000.);
#6804=VECTOR('',#40566,1000.);
#6805=VECTOR('',#40569,1000.);
#6806=VECTOR('',#40574,1000.);
#6807=VECTOR('',#40575,1000.);
#6808=VECTOR('',#40578,1000.);
#6809=VECTOR('',#40581,1000.);
#6810=VECTOR('',#40584,1000.);
#6811=VECTOR('',#40587,1000.);
#6812=VECTOR('',#40590,1000.);
#6813=VECTOR('',#40593,1000.);
#6814=VECTOR('',#40598,1000.);
#6815=VECTOR('',#40601,1000.);
#6816=VECTOR('',#40606,1000.);
#6817=VECTOR('',#40607,1000.);
#6818=VECTOR('',#40610,1000.);
#6819=VECTOR('',#40613,1000.);
#6820=VECTOR('',#40616,1000.);
#6821=VECTOR('',#40619,1000.);
#6822=VECTOR('',#40622,1000.);
#6823=VECTOR('',#40625,1000.);
#6824=VECTOR('',#40630,1000.);
#6825=VECTOR('',#40631,1000.);
#6826=VECTOR('',#40634,1000.);
#6827=VECTOR('',#40637,1000.);
#6828=VECTOR('',#40640,1000.);
#6829=VECTOR('',#40643,1000.);
#6830=VECTOR('',#40646,1000.);
#6831=VECTOR('',#40649,1000.);
#6832=VECTOR('',#40654,1000.);
#6833=VECTOR('',#40655,1000.);
#6834=VECTOR('',#40658,1000.);
#6835=VECTOR('',#40661,1000.);
#6836=VECTOR('',#40664,1000.);
#6837=VECTOR('',#40667,1000.);
#6838=VECTOR('',#40670,1000.);
#6839=VECTOR('',#40671,1000.);
#6840=VECTOR('',#40674,1000.);
#6841=VECTOR('',#40677,1000.);
#6842=VECTOR('',#40680,1000.);
#6843=VECTOR('',#40683,1000.);
#6844=VECTOR('',#40686,1000.);
#6845=VECTOR('',#40689,1000.);
#6846=VECTOR('',#40694,1000.);
#6847=VECTOR('',#40695,1000.);
#6848=VECTOR('',#40698,1000.);
#6849=VECTOR('',#40701,1000.);
#6850=VECTOR('',#40704,1000.);
#6851=VECTOR('',#40707,1000.);
#6852=VECTOR('',#40710,1000.);
#6853=VECTOR('',#40713,1000.);
#6854=VECTOR('',#40718,1000.);
#6855=VECTOR('',#40721,1000.);
#6856=VECTOR('',#40726,1000.);
#6857=VECTOR('',#40727,1000.);
#6858=VECTOR('',#40730,1000.);
#6859=VECTOR('',#40733,1000.);
#6860=VECTOR('',#40736,1000.);
#6861=VECTOR('',#40739,1000.);
#6862=VECTOR('',#40742,1000.);
#6863=VECTOR('',#40745,1000.);
#6864=VECTOR('',#40750,1000.);
#6865=VECTOR('',#40751,1000.);
#6866=VECTOR('',#40754,1000.);
#6867=VECTOR('',#40757,1000.);
#6868=VECTOR('',#40760,1000.);
#6869=VECTOR('',#40763,1000.);
#6870=VECTOR('',#40766,1000.);
#6871=VECTOR('',#40769,1000.);
#6872=VECTOR('',#40774,1000.);
#6873=VECTOR('',#40777,10.);
#6874=VECTOR('',#40780,1000.);
#6875=VECTOR('',#40781,1000.);
#6876=VECTOR('',#40784,1000.);
#6877=VECTOR('',#40787,1000.);
#6878=VECTOR('',#40790,1000.);
#6879=VECTOR('',#40793,1000.);
#6880=VECTOR('',#40796,1000.);
#6881=VECTOR('',#40799,1000.);
#6882=VECTOR('',#40804,1000.);
#6883=VECTOR('',#40805,1000.);
#6884=VECTOR('',#40808,1000.);
#6885=VECTOR('',#40811,1000.);
#6886=VECTOR('',#40814,1000.);
#6887=VECTOR('',#40817,1000.);
#6888=VECTOR('',#40820,1000.);
#6889=VECTOR('',#40823,1000.);
#6890=VECTOR('',#40828,1000.);
#6891=VECTOR('',#40829,1000.);
#6892=VECTOR('',#40832,1000.);
#6893=VECTOR('',#40835,1000.);
#6894=VECTOR('',#40838,1000.);
#6895=VECTOR('',#40841,1000.);
#6896=VECTOR('',#40844,1000.);
#6897=VECTOR('',#40847,1000.);
#6898=VECTOR('',#40852,1000.);
#6899=VECTOR('',#40853,1000.);
#6900=VECTOR('',#40856,1000.);
#6901=VECTOR('',#40861,1000.);
#6902=VECTOR('',#40862,1000.);
#6903=VECTOR('',#40867,1000.);
#6904=VECTOR('',#40868,1000.);
#6905=VECTOR('',#40871,1000.);
#6906=VECTOR('',#40872,1000.);
#6907=CONICAL_SURFACE('',#29664,45.72,1.31772358525572);
#6908=CONICAL_SURFACE('',#29666,52.324,0.0523598775598206);
#6909=CONICAL_SURFACE('',#29668,50.4825,0.0174532925199458);
#6910=CONICAL_SURFACE('',#29671,49.4931015189506,0.0174532925199445);
#6911=CONICAL_SURFACE('',#29674,49.4665,1.31772358525572);
#6912=CONICAL_SURFACE('',#31070,0.25,0.0174532925199433);
#6913=CONICAL_SURFACE('',#31074,0.25,0.0174532925199433);
#6914=CONICAL_SURFACE('',#31075,0.25,0.0174532925199433);
#6915=CONICAL_SURFACE('',#31078,0.25,0.0174532925199433);
#6916=CONICAL_SURFACE('',#31082,0.25,0.0174532925199433);
#6917=CONICAL_SURFACE('',#31083,0.25,0.0174532925199433);
#6918=CONICAL_SURFACE('',#31087,0.25,0.0174532925199433);
#6919=CONICAL_SURFACE('',#31088,0.25,0.0174532925199433);
#6920=CONICAL_SURFACE('',#31092,0.25,0.0174532925199433);
#6921=CONICAL_SURFACE('',#31093,0.25,0.0174532925199433);
#6922=CONICAL_SURFACE('',#31097,0.25,0.0174532925199433);
#6923=CONICAL_SURFACE('',#31098,0.25,0.0174532925199433);
#6924=CONICAL_SURFACE('',#31102,0.25,0.0174532925199433);
#6925=CONICAL_SURFACE('',#31103,0.25,0.0174532925199433);
#6926=CONICAL_SURFACE('',#31105,0.25,0.0174532925199433);
#6927=CONICAL_SURFACE('',#31107,0.25,0.0174532925199433);
#6928=CONICAL_SURFACE('',#31109,0.25,0.0174532925199433);
#6929=CONICAL_SURFACE('',#31110,0.25,0.0174532925199433);
#6930=CONICAL_SURFACE('',#31112,0.25,0.0174532925199433);
#6931=CONICAL_SURFACE('',#31114,0.25,0.0174532925199433);
#6932=CONICAL_SURFACE('',#31116,0.25,0.0174532925199433);
#6933=CONICAL_SURFACE('',#31118,0.25,0.0174532925199433);
#6934=CONICAL_SURFACE('',#31120,0.25,0.0174532925199433);
#6935=CONICAL_SURFACE('',#31122,0.25,0.0174532925199433);
#6936=CONICAL_SURFACE('',#31124,0.25,0.0174532925199433);
#6937=CONICAL_SURFACE('',#31127,0.25,0.0174532925199433);
#6938=CONICAL_SURFACE('',#31129,0.25,0.0174532925199433);
#6939=CONICAL_SURFACE('',#31131,0.25,0.0174532925199433);
#6940=CONICAL_SURFACE('',#31133,0.25,0.0174532925199433);
#6941=CONICAL_SURFACE('',#31135,0.25,0.0174532925199433);
#6942=CONICAL_SURFACE('',#31137,0.25,0.0174532925199433);
#6943=CONICAL_SURFACE('',#31139,0.25,0.0174532925199433);
#6944=CONICAL_SURFACE('',#31141,0.25,0.0174532925199433);
#6945=CONICAL_SURFACE('',#31143,0.25,0.0174532925199433);
#6946=CONICAL_SURFACE('',#31145,0.25,0.0174532925199433);
#6947=CONICAL_SURFACE('',#31147,0.25,0.0174532925199433);
#6948=CONICAL_SURFACE('',#31149,0.25,0.0174532925199433);
#6949=CONICAL_SURFACE('',#31151,0.25,0.0174532925199433);
#6950=CONICAL_SURFACE('',#31153,0.25,0.0174532925199433);
#6951=CONICAL_SURFACE('',#31155,0.25,0.0174532925199433);
#6952=CONICAL_SURFACE('',#31157,0.25,0.0174532925199433);
#6953=CONICAL_SURFACE('',#31159,0.25,0.0174532925199433);
#6954=CONICAL_SURFACE('',#31160,0.25,0.0174532925199433);
#6955=CONICAL_SURFACE('',#31162,0.25,0.0174532925199433);
#6956=CONICAL_SURFACE('',#31164,0.25,0.0174532925199433);
#6957=CONICAL_SURFACE('',#31166,0.25,0.0174532925199433);
#6958=CONICAL_SURFACE('',#31168,0.25,0.0174532925199433);
#6959=CONICAL_SURFACE('',#31170,0.25,0.0174532925199433);
#6960=CONICAL_SURFACE('',#31172,0.25,0.0174532925199433);
#6961=CONICAL_SURFACE('',#31174,0.25,0.0174532925199433);
#6962=CONICAL_SURFACE('',#31177,0.25,0.0174532925199433);
#6963=CONICAL_SURFACE('',#31179,0.25,0.0174532925199433);
#6964=CONICAL_SURFACE('',#31181,0.25,0.0174532925199433);
#6965=CONICAL_SURFACE('',#31183,0.25,0.0174532925199433);
#6966=CONICAL_SURFACE('',#31185,0.25,0.0174532925199433);
#6967=CONICAL_SURFACE('',#31187,0.25,0.0174532925199433);
#6968=CONICAL_SURFACE('',#31189,0.25,0.0174532925199433);
#6969=CONICAL_SURFACE('',#31191,0.25,0.0174532925199433);
#6970=CONICAL_SURFACE('',#31193,0.25,0.0174532925199433);
#6971=CONICAL_SURFACE('',#31195,0.25,0.0174532925199433);
#6972=CONICAL_SURFACE('',#31197,0.25,0.0174532925199433);
#6973=CONICAL_SURFACE('',#31199,0.25,0.0174532925199433);
#6974=CONICAL_SURFACE('',#31201,0.25,0.0174532925199433);
#6975=CONICAL_SURFACE('',#31202,0.25,0.0174532925199433);
#6976=CONICAL_SURFACE('',#31204,0.25,0.0174532925199433);
#6977=CONICAL_SURFACE('',#31206,0.25,0.0174532925199433);
#6978=CONICAL_SURFACE('',#31208,0.25,0.0174532925199433);
#6979=CONICAL_SURFACE('',#31210,0.25,0.0174532925199433);
#6980=CONICAL_SURFACE('',#31212,0.25,0.0174532925199433);
#6981=CONICAL_SURFACE('',#31214,0.25,0.0174532925199433);
#6982=CONICAL_SURFACE('',#31216,0.25,0.0174532925199433);
#6983=CONICAL_SURFACE('',#31218,0.25,0.0174532925199433);
#6984=CONICAL_SURFACE('',#31220,0.25,0.0174532925199433);
#6985=CONICAL_SURFACE('',#31222,0.25,0.0174532925199433);
#6986=CONICAL_SURFACE('',#31224,0.25,0.0174532925199433);
#6987=CONICAL_SURFACE('',#31226,0.25,0.0174532925199433);
#6988=CONICAL_SURFACE('',#31228,0.25,0.0174532925199433);
#6989=CONICAL_SURFACE('',#31230,0.25,0.0174532925199433);
#6990=CONICAL_SURFACE('',#31232,0.25,0.0174532925199433);
#6991=CONICAL_SURFACE('',#31234,0.25,0.0174532925199433);
#6992=CONICAL_SURFACE('',#31237,0.25,0.0174532925199433);
#6993=CONICAL_SURFACE('',#31239,0.25,0.0174532925199433);
#6994=CONICAL_SURFACE('',#31241,0.25,0.0174532925199433);
#6995=CONICAL_SURFACE('',#31243,0.25,0.0174532925199433);
#6996=CONICAL_SURFACE('',#31245,0.25,0.0174532925199433);
#6997=CONICAL_SURFACE('',#31247,0.25,0.0174532925199433);
#6998=CONICAL_SURFACE('',#31249,0.25,0.0174532925199433);
#6999=CONICAL_SURFACE('',#31250,43.18,0.0174532925199433);
#7000=CONICAL_SURFACE('',#31251,43.18,0.0174532925199433);
#7001=CONICAL_SURFACE('',#31253,43.18,0.0174532925199433);
#7002=CONICAL_SURFACE('',#31254,43.18,0.0174532925199433);
#7003=CONICAL_SURFACE('',#31255,43.18,0.0174532925199433);
#7004=CONICAL_SURFACE('',#31259,0.25,0.0174532925199433);
#7005=CONICAL_SURFACE('',#31260,0.25,0.0174532925199433);
#7006=CONICAL_SURFACE('',#31261,0.25,0.0174532925199433);
#7007=CONICAL_SURFACE('',#31263,0.25,0.0174532925199433);
#7008=CONICAL_SURFACE('',#31265,0.25,0.0174532925199433);
#7009=CONICAL_SURFACE('',#31266,0.25,0.0174532925199433);
#7010=CONICAL_SURFACE('',#31268,0.25,0.0174532925199433);
#7011=CONICAL_SURFACE('',#31269,0.25,0.0174532925199433);
#7012=CONICAL_SURFACE('',#31271,0.25,0.0174532925199433);
#7013=CONICAL_SURFACE('',#31272,0.25,0.0174532925199433);
#7014=CONICAL_SURFACE('',#31274,0.25,0.0174532925199433);
#7015=CONICAL_SURFACE('',#31275,0.25,0.0174532925199433);
#7016=CONICAL_SURFACE('',#31277,0.25,0.0174532925199433);
#7017=CONICAL_SURFACE('',#31278,0.25,0.0174532925199433);
#7018=CONICAL_SURFACE('',#31280,0.25,0.0174532925199433);
#7019=CONICAL_SURFACE('',#31282,0.25,0.0174532925199433);
#7020=CONICAL_SURFACE('',#31284,0.25,0.0174532925199433);
#7021=CONICAL_SURFACE('',#31285,0.25,0.0174532925199433);
#7022=CONICAL_SURFACE('',#31287,0.25,0.0174532925199433);
#7023=CONICAL_SURFACE('',#31289,0.25,0.0174532925199433);
#7024=CONICAL_SURFACE('',#31291,0.25,0.0174532925199433);
#7025=CONICAL_SURFACE('',#31293,0.25,0.0174532925199433);
#7026=CONICAL_SURFACE('',#31295,0.25,0.0174532925199433);
#7027=CONICAL_SURFACE('',#31297,0.25,0.0174532925199433);
#7028=CONICAL_SURFACE('',#31299,0.25,0.0174532925199433);
#7029=CONICAL_SURFACE('',#31302,0.25,0.0174532925199433);
#7030=CONICAL_SURFACE('',#31304,0.25,0.0174532925199433);
#7031=CONICAL_SURFACE('',#31306,0.25,0.0174532925199433);
#7032=CONICAL_SURFACE('',#31308,0.25,0.0174532925199433);
#7033=CONICAL_SURFACE('',#31310,0.25,0.0174532925199433);
#7034=CONICAL_SURFACE('',#31312,0.25,0.0174532925199433);
#7035=CONICAL_SURFACE('',#31314,0.25,0.0174532925199433);
#7036=CONICAL_SURFACE('',#31316,0.25,0.0174532925199433);
#7037=CONICAL_SURFACE('',#31318,0.25,0.0174532925199433);
#7038=CONICAL_SURFACE('',#31320,0.25,0.0174532925199433);
#7039=CONICAL_SURFACE('',#31322,0.25,0.0174532925199433);
#7040=CONICAL_SURFACE('',#31324,0.25,0.0174532925199433);
#7041=CONICAL_SURFACE('',#31326,0.25,0.0174532925199433);
#7042=CONICAL_SURFACE('',#31328,0.25,0.0174532925199433);
#7043=CONICAL_SURFACE('',#31330,0.25,0.0174532925199433);
#7044=CONICAL_SURFACE('',#31332,0.25,0.0174532925199433);
#7045=CONICAL_SURFACE('',#31334,0.25,0.0174532925199433);
#7046=CONICAL_SURFACE('',#31335,0.25,0.0174532925199433);
#7047=CONICAL_SURFACE('',#31337,0.25,0.0174532925199433);
#7048=CONICAL_SURFACE('',#31339,0.25,0.0174532925199433);
#7049=CONICAL_SURFACE('',#31341,0.25,0.0174532925199433);
#7050=CONICAL_SURFACE('',#31343,0.25,0.0174532925199433);
#7051=CONICAL_SURFACE('',#31345,0.25,0.0174532925199433);
#7052=CONICAL_SURFACE('',#31347,0.25,0.0174532925199433);
#7053=CONICAL_SURFACE('',#31349,0.25,0.0174532925199433);
#7054=CONICAL_SURFACE('',#31352,0.25,0.0174532925199433);
#7055=CONICAL_SURFACE('',#31354,0.25,0.0174532925199433);
#7056=CONICAL_SURFACE('',#31356,0.25,0.0174532925199433);
#7057=CONICAL_SURFACE('',#31358,0.25,0.0174532925199433);
#7058=CONICAL_SURFACE('',#31360,0.25,0.0174532925199433);
#7059=CONICAL_SURFACE('',#31362,0.25,0.0174532925199433);
#7060=CONICAL_SURFACE('',#31364,0.25,0.0174532925199433);
#7061=CONICAL_SURFACE('',#31366,0.25,0.0174532925199433);
#7062=CONICAL_SURFACE('',#31368,0.25,0.0174532925199433);
#7063=CONICAL_SURFACE('',#31370,0.25,0.0174532925199433);
#7064=CONICAL_SURFACE('',#31372,0.25,0.0174532925199433);
#7065=CONICAL_SURFACE('',#31374,0.25,0.0174532925199433);
#7066=CONICAL_SURFACE('',#31376,0.25,0.0174532925199433);
#7067=CONICAL_SURFACE('',#31377,0.25,0.0174532925199433);
#7068=CONICAL_SURFACE('',#31379,0.25,0.0174532925199433);
#7069=CONICAL_SURFACE('',#31381,0.25,0.0174532925199433);
#7070=CONICAL_SURFACE('',#31383,0.25,0.0174532925199433);
#7071=CONICAL_SURFACE('',#31385,0.25,0.0174532925199433);
#7072=CONICAL_SURFACE('',#31387,0.25,0.0174532925199433);
#7073=CONICAL_SURFACE('',#31389,0.25,0.0174532925199433);
#7074=CONICAL_SURFACE('',#31391,0.25,0.0174532925199433);
#7075=CONICAL_SURFACE('',#31393,0.25,0.0174532925199433);
#7076=CONICAL_SURFACE('',#31395,0.25,0.0174532925199433);
#7077=CONICAL_SURFACE('',#31397,0.25,0.0174532925199433);
#7078=CONICAL_SURFACE('',#31399,0.25,0.0174532925199433);
#7079=CONICAL_SURFACE('',#31401,0.25,0.0174532925199433);
#7080=CONICAL_SURFACE('',#31403,0.25,0.0174532925199433);
#7081=CONICAL_SURFACE('',#31405,0.25,0.0174532925199433);
#7082=CONICAL_SURFACE('',#31407,0.25,0.0174532925199433);
#7083=CONICAL_SURFACE('',#31409,0.25,0.0174532925199433);
#7084=CONICAL_SURFACE('',#31412,0.25,0.0174532925199433);
#7085=CONICAL_SURFACE('',#31414,0.25,0.0174532925199433);
#7086=CONICAL_SURFACE('',#31416,0.25,0.0174532925199433);
#7087=CONICAL_SURFACE('',#31418,0.25,0.0174532925199433);
#7088=CONICAL_SURFACE('',#31420,0.25,0.0174532925199433);
#7089=CONICAL_SURFACE('',#31422,0.25,0.0174532925199433);
#7090=CONICAL_SURFACE('',#31424,0.25,0.0174532925199433);
#7091=CONICAL_SURFACE('',#31425,43.18,0.0174532925199433);
#7092=CONICAL_SURFACE('',#31426,43.18,0.0174532925199433);
#7093=CONICAL_SURFACE('',#31428,43.18,0.0174532925199433);
#7094=CONICAL_SURFACE('',#31429,43.18,0.0174532925199433);
#7095=CONICAL_SURFACE('',#31433,0.25,0.0174532925199433);
#7096=CONICAL_SURFACE('',#31434,0.25,0.0174532925199433);
#7097=CONICAL_SURFACE('',#31437,0.25,0.0174532925199433);
#7098=CONICAL_SURFACE('',#31441,0.25,0.0174532925199433);
#7099=CONICAL_SURFACE('',#31442,0.25,0.0174532925199433);
#7100=CONICAL_SURFACE('',#31446,0.25,0.0174532925199433);
#7101=CONICAL_SURFACE('',#31447,0.25,0.0174532925199433);
#7102=CONICAL_SURFACE('',#31451,0.25,0.0174532925199433);
#7103=CONICAL_SURFACE('',#31452,0.25,0.0174532925199433);
#7104=CONICAL_SURFACE('',#31456,0.25,0.0174532925199433);
#7105=CONICAL_SURFACE('',#31457,0.25,0.0174532925199433);
#7106=CONICAL_SURFACE('',#31461,0.25,0.0174532925199433);
#7107=CONICAL_SURFACE('',#31462,0.25,0.0174532925199433);
#7108=CONICAL_SURFACE('',#31465,0.25,0.0174532925199433);
#7109=CONICAL_SURFACE('',#31467,0.249999999999999,0.0174532925199433);
#7110=CONICAL_SURFACE('',#31469,0.25,0.0174532925199433);
#7111=CONICAL_SURFACE('',#31471,0.25,0.0174532925199433);
#7112=CONICAL_SURFACE('',#31473,0.249999999999999,0.0174532925199433);
#7113=CONICAL_SURFACE('',#31475,0.25,0.0174532925199433);
#7114=CONICAL_SURFACE('',#31477,0.25,0.0174532925199433);
#7115=CONICAL_SURFACE('',#31479,0.25,0.0174532925199433);
#7116=CONICAL_SURFACE('',#31481,0.25,0.0174532925199433);
#7117=CONICAL_SURFACE('',#31484,0.25,0.0174532925199433);
#7118=CONICAL_SURFACE('',#31486,0.25,0.0174532925199433);
#7119=CONICAL_SURFACE('',#31488,0.249999999999999,0.0174532925199433);
#7120=CONICAL_SURFACE('',#31490,0.25,0.0174532925199433);
#7121=CONICAL_SURFACE('',#31492,0.25,0.0174532925199433);
#7122=CONICAL_SURFACE('',#31494,0.249999999999999,0.0174532925199433);
#7123=CONICAL_SURFACE('',#31496,0.249999999999999,0.0174532925199433);
#7124=CONICAL_SURFACE('',#31498,0.25,0.0174532925199433);
#7125=CONICAL_SURFACE('',#31500,0.25,0.0174532925199433);
#7126=CONICAL_SURFACE('',#31502,0.25,0.0174532925199433);
#7127=CONICAL_SURFACE('',#31504,0.25,0.0174532925199433);
#7128=CONICAL_SURFACE('',#31506,0.25,0.0174532925199433);
#7129=CONICAL_SURFACE('',#31508,0.25,0.0174532925199433);
#7130=CONICAL_SURFACE('',#31510,0.25,0.0174532925199433);
#7131=CONICAL_SURFACE('',#31513,0.25,0.0174532925199433);
#7132=CONICAL_SURFACE('',#31515,0.25,0.0174532925199433);
#7133=CONICAL_SURFACE('',#31517,0.25,0.0174532925199433);
#7134=CONICAL_SURFACE('',#31519,0.25,0.0174532925199433);
#7135=CONICAL_SURFACE('',#31521,0.25,0.0174532925199433);
#7136=CONICAL_SURFACE('',#31523,0.25,0.0174532925199433);
#7137=CONICAL_SURFACE('',#31525,0.25,0.0174532925199433);
#7138=CONICAL_SURFACE('',#31527,0.25,0.0174532925199433);
#7139=CONICAL_SURFACE('',#31529,0.25,0.0174532925199433);
#7140=CONICAL_SURFACE('',#31532,0.25,0.0174532925199433);
#7141=CONICAL_SURFACE('',#31534,0.25,0.0174532925199433);
#7142=CONICAL_SURFACE('',#31536,0.25,0.0174532925199433);
#7143=CONICAL_SURFACE('',#31538,0.25,0.0174532925199433);
#7144=CONICAL_SURFACE('',#31540,0.25,0.0174532925199433);
#7145=CONICAL_SURFACE('',#31542,0.25,0.0174532925199433);
#7146=CONICAL_SURFACE('',#31544,0.25,0.0174532925199433);
#7147=CONICAL_SURFACE('',#31546,0.25,0.0174532925199433);
#7148=CONICAL_SURFACE('',#31548,0.25,0.0174532925199433);
#7149=CONICAL_SURFACE('',#31550,0.25,0.0174532925199433);
#7150=CONICAL_SURFACE('',#31553,0.25,0.0174532925199433);
#7151=CONICAL_SURFACE('',#31555,0.25,0.0174532925199433);
#7152=CONICAL_SURFACE('',#31557,0.25,0.0174532925199433);
#7153=CONICAL_SURFACE('',#31559,0.25,0.0174532925199433);
#7154=CONICAL_SURFACE('',#31561,0.25,0.0174532925199433);
#7155=CONICAL_SURFACE('',#31563,0.25,0.0174532925199433);
#7156=CONICAL_SURFACE('',#31565,0.25,0.0174532925199433);
#7157=CONICAL_SURFACE('',#31567,0.25,0.0174532925199433);
#7158=CONICAL_SURFACE('',#31569,0.25,0.0174532925199433);
#7159=CONICAL_SURFACE('',#31571,0.25,0.0174532925199433);
#7160=CONICAL_SURFACE('',#31573,0.25,0.0174532925199433);
#7161=CONICAL_SURFACE('',#31575,0.25,0.0174532925199433);
#7162=CONICAL_SURFACE('',#31577,0.25,0.0174532925199433);
#7163=CONICAL_SURFACE('',#31579,0.25,0.0174532925199433);
#7164=CONICAL_SURFACE('',#31581,0.25,0.0174532925199433);
#7165=CONICAL_SURFACE('',#31583,0.25,0.0174532925199433);
#7166=CONICAL_SURFACE('',#31585,0.25,0.0174532925199433);
#7167=CONICAL_SURFACE('',#31587,0.25,0.0174532925199433);
#7168=CONICAL_SURFACE('',#31590,0.25,0.0174532925199433);
#7169=CONICAL_SURFACE('',#31592,0.25,0.0174532925199433);
#7170=CONICAL_SURFACE('',#31595,0.25,0.0174532925199433);
#7171=CONICAL_SURFACE('',#31598,0.25,0.0174532925199433);
#7172=CONICAL_SURFACE('',#31600,43.18,0.0174532925199433);
#7173=CONICAL_SURFACE('',#31602,43.18,0.0174532925199433);
#7174=CONICAL_SURFACE('',#31603,43.18,0.0174532925199433);
#7175=CONICAL_SURFACE('',#31604,43.18,0.0174532925199433);
#7176=CONICAL_SURFACE('',#31605,0.25,0.0174532925199433);
#7177=CONICAL_SURFACE('',#31606,0.25,0.0174532925199433);
#7178=CONICAL_SURFACE('',#31607,0.25,0.0174532925199433);
#7179=CONICAL_SURFACE('',#31609,0.25,0.0174532925199433);
#7180=CONICAL_SURFACE('',#31611,0.25,0.0174532925199433);
#7181=CONICAL_SURFACE('',#31612,0.25,0.0174532925199433);
#7182=CONICAL_SURFACE('',#31614,0.25,0.0174532925199433);
#7183=CONICAL_SURFACE('',#31615,0.25,0.0174532925199433);
#7184=CONICAL_SURFACE('',#31617,0.25,0.0174532925199433);
#7185=CONICAL_SURFACE('',#31618,0.25,0.0174532925199433);
#7186=CONICAL_SURFACE('',#31620,0.25,0.0174532925199433);
#7187=CONICAL_SURFACE('',#31621,0.25,0.0174532925199433);
#7188=CONICAL_SURFACE('',#31623,0.25,0.0174532925199433);
#7189=CONICAL_SURFACE('',#31624,0.25,0.0174532925199433);
#7190=CONICAL_SURFACE('',#31626,0.25,0.0174532925199433);
#7191=CONICAL_SURFACE('',#31628,0.25,0.0174532925199433);
#7192=CONICAL_SURFACE('',#31630,0.25,0.0174532925199433);
#7193=CONICAL_SURFACE('',#31631,0.249999999999999,0.0174532925199433);
#7194=CONICAL_SURFACE('',#31633,0.25,0.0174532925199433);
#7195=CONICAL_SURFACE('',#31635,0.25,0.0174532925199433);
#7196=CONICAL_SURFACE('',#31637,0.249999999999999,0.0174532925199433);
#7197=CONICAL_SURFACE('',#31639,0.25,0.0174532925199433);
#7198=CONICAL_SURFACE('',#31641,0.25,0.0174532925199433);
#7199=CONICAL_SURFACE('',#31643,0.25,0.0174532925199433);
#7200=CONICAL_SURFACE('',#31645,0.25,0.0174532925199433);
#7201=CONICAL_SURFACE('',#31648,0.25,0.0174532925199433);
#7202=CONICAL_SURFACE('',#31650,0.25,0.0174532925199433);
#7203=CONICAL_SURFACE('',#31652,0.249999999999999,0.0174532925199433);
#7204=CONICAL_SURFACE('',#31654,0.25,0.0174532925199433);
#7205=CONICAL_SURFACE('',#31656,0.25,0.0174532925199433);
#7206=CONICAL_SURFACE('',#31658,0.249999999999999,0.0174532925199433);
#7207=CONICAL_SURFACE('',#31660,0.249999999999999,0.0174532925199433);
#7208=CONICAL_SURFACE('',#31662,0.25,0.0174532925199433);
#7209=CONICAL_SURFACE('',#31664,0.25,0.0174532925199433);
#7210=CONICAL_SURFACE('',#31666,0.25,0.0174532925199433);
#7211=CONICAL_SURFACE('',#31668,0.25,0.0174532925199433);
#7212=CONICAL_SURFACE('',#31670,0.25,0.0174532925199433);
#7213=CONICAL_SURFACE('',#31672,0.25,0.0174532925199433);
#7214=CONICAL_SURFACE('',#31674,0.25,0.0174532925199433);
#7215=CONICAL_SURFACE('',#31676,0.25,0.0174532925199433);
#7216=CONICAL_SURFACE('',#31678,0.25,0.0174532925199433);
#7217=CONICAL_SURFACE('',#31680,0.25,0.0174532925199433);
#7218=CONICAL_SURFACE('',#31681,0.25,0.0174532925199433);
#7219=CONICAL_SURFACE('',#31683,0.25,0.0174532925199433);
#7220=CONICAL_SURFACE('',#31685,0.25,0.0174532925199433);
#7221=CONICAL_SURFACE('',#31687,0.25,0.0174532925199433);
#7222=CONICAL_SURFACE('',#31689,0.25,0.0174532925199433);
#7223=CONICAL_SURFACE('',#31691,0.25,0.0174532925199433);
#7224=CONICAL_SURFACE('',#31693,0.25,0.0174532925199433);
#7225=CONICAL_SURFACE('',#31695,0.25,0.0174532925199433);
#7226=CONICAL_SURFACE('',#31698,0.25,0.0174532925199433);
#7227=CONICAL_SURFACE('',#31700,0.25,0.0174532925199433);
#7228=CONICAL_SURFACE('',#31702,0.25,0.0174532925199433);
#7229=CONICAL_SURFACE('',#31704,0.25,0.0174532925199433);
#7230=CONICAL_SURFACE('',#31706,0.25,0.0174532925199433);
#7231=CONICAL_SURFACE('',#31708,0.25,0.0174532925199433);
#7232=CONICAL_SURFACE('',#31710,0.25,0.0174532925199433);
#7233=CONICAL_SURFACE('',#31712,0.25,0.0174532925199433);
#7234=CONICAL_SURFACE('',#31714,0.25,0.0174532925199433);
#7235=CONICAL_SURFACE('',#31716,0.25,0.0174532925199433);
#7236=CONICAL_SURFACE('',#31718,0.25,0.0174532925199433);
#7237=CONICAL_SURFACE('',#31720,0.25,0.0174532925199433);
#7238=CONICAL_SURFACE('',#31722,0.25,0.0174532925199433);
#7239=CONICAL_SURFACE('',#31723,0.25,0.0174532925199433);
#7240=CONICAL_SURFACE('',#31725,0.25,0.0174532925199433);
#7241=CONICAL_SURFACE('',#31727,0.25,0.0174532925199433);
#7242=CONICAL_SURFACE('',#31729,0.25,0.0174532925199433);
#7243=CONICAL_SURFACE('',#31731,0.25,0.0174532925199433);
#7244=CONICAL_SURFACE('',#31733,0.25,0.0174532925199433);
#7245=CONICAL_SURFACE('',#31735,0.25,0.0174532925199433);
#7246=CONICAL_SURFACE('',#31737,0.25,0.0174532925199433);
#7247=CONICAL_SURFACE('',#31739,0.25,0.0174532925199433);
#7248=CONICAL_SURFACE('',#31741,0.25,0.0174532925199433);
#7249=CONICAL_SURFACE('',#31743,0.25,0.0174532925199433);
#7250=CONICAL_SURFACE('',#31745,0.25,0.0174532925199433);
#7251=CONICAL_SURFACE('',#31747,0.25,0.0174532925199433);
#7252=CONICAL_SURFACE('',#31749,0.25,0.0174532925199433);
#7253=CONICAL_SURFACE('',#31751,0.25,0.0174532925199433);
#7254=CONICAL_SURFACE('',#31753,0.25,0.0174532925199433);
#7255=CONICAL_SURFACE('',#31755,0.25,0.0174532925199433);
#7256=CONICAL_SURFACE('',#31758,0.25,0.0174532925199433);
#7257=CONICAL_SURFACE('',#31760,0.25,0.0174532925199433);
#7258=CONICAL_SURFACE('',#31762,0.25,0.0174532925199433);
#7259=CONICAL_SURFACE('',#31764,0.25,0.0174532925199433);
#7260=CONICAL_SURFACE('',#31766,0.25,0.0174532925199433);
#7261=CONICAL_SURFACE('',#31768,0.25,0.0174532925199433);
#7262=CONICAL_SURFACE('',#31770,0.25,0.0174532925199433);
#7263=CONICAL_SURFACE('',#31771,43.18,0.0174532925199433);
#7264=CONICAL_SURFACE('',#31772,43.18,0.0174532925199433);
#7265=CONICAL_SURFACE('',#31774,43.18,0.0174532925199433);
#7266=CONICAL_SURFACE('',#31775,43.18,0.0174532925199433);
#7267=CONICAL_SURFACE('',#31779,0.25,0.0174532925199433);
#7268=CONICAL_SURFACE('',#31780,0.25,0.0174532925199433);
#7269=CONICAL_SURFACE('',#31783,0.25,0.0174532925199433);
#7270=CONICAL_SURFACE('',#31787,0.25,0.0174532925199433);
#7271=CONICAL_SURFACE('',#31788,0.25,0.0174532925199433);
#7272=CONICAL_SURFACE('',#31792,0.25,0.0174532925199433);
#7273=CONICAL_SURFACE('',#31793,0.25,0.0174532925199433);
#7274=CONICAL_SURFACE('',#31797,0.25,0.0174532925199433);
#7275=CONICAL_SURFACE('',#31798,0.25,0.0174532925199433);
#7276=CONICAL_SURFACE('',#31802,0.25,0.0174532925199433);
#7277=CONICAL_SURFACE('',#31803,0.25,0.0174532925199433);
#7278=CONICAL_SURFACE('',#31807,0.25,0.0174532925199433);
#7279=CONICAL_SURFACE('',#31808,0.25,0.0174532925199433);
#7280=CONICAL_SURFACE('',#31811,0.25,0.0174532925199433);
#7281=CONICAL_SURFACE('',#31813,0.25,0.0174532925199433);
#7282=CONICAL_SURFACE('',#31815,0.25,0.0174532925199433);
#7283=CONICAL_SURFACE('',#31817,0.25,0.0174532925199433);
#7284=CONICAL_SURFACE('',#31819,0.25,0.0174532925199433);
#7285=CONICAL_SURFACE('',#31821,0.25,0.0174532925199433);
#7286=CONICAL_SURFACE('',#31823,0.25,0.0174532925199433);
#7287=CONICAL_SURFACE('',#31825,0.25,0.0174532925199433);
#7288=CONICAL_SURFACE('',#31827,0.25,0.0174532925199433);
#7289=CONICAL_SURFACE('',#31830,0.25,0.0174532925199433);
#7290=CONICAL_SURFACE('',#31832,0.25,0.0174532925199433);
#7291=CONICAL_SURFACE('',#31834,0.25,0.0174532925199433);
#7292=CONICAL_SURFACE('',#31836,0.25,0.0174532925199433);
#7293=CONICAL_SURFACE('',#31838,0.25,0.0174532925199433);
#7294=CONICAL_SURFACE('',#31840,0.25,0.0174532925199433);
#7295=CONICAL_SURFACE('',#31842,0.25,0.0174532925199433);
#7296=CONICAL_SURFACE('',#31844,0.25,0.0174532925199433);
#7297=CONICAL_SURFACE('',#31846,0.25,0.0174532925199433);
#7298=CONICAL_SURFACE('',#31848,0.25,0.0174532925199433);
#7299=CONICAL_SURFACE('',#31850,0.25,0.0174532925199433);
#7300=CONICAL_SURFACE('',#31852,0.25,0.0174532925199433);
#7301=CONICAL_SURFACE('',#31854,0.25,0.0174532925199433);
#7302=CONICAL_SURFACE('',#31856,0.25,0.0174532925199433);
#7303=CONICAL_SURFACE('',#31859,0.25,0.0174532925199433);
#7304=CONICAL_SURFACE('',#31861,0.25,0.0174532925199433);
#7305=CONICAL_SURFACE('',#31863,0.25,0.0174532925199433);
#7306=CONICAL_SURFACE('',#31865,0.25,0.0174532925199433);
#7307=CONICAL_SURFACE('',#31867,0.25,0.0174532925199433);
#7308=CONICAL_SURFACE('',#31869,0.25,0.0174532925199433);
#7309=CONICAL_SURFACE('',#31871,0.25,0.0174532925199433);
#7310=CONICAL_SURFACE('',#31873,0.25,0.0174532925199433);
#7311=CONICAL_SURFACE('',#31875,0.25,0.0174532925199433);
#7312=CONICAL_SURFACE('',#31878,0.25,0.0174532925199433);
#7313=CONICAL_SURFACE('',#31880,0.25,0.0174532925199433);
#7314=CONICAL_SURFACE('',#31882,0.25,0.0174532925199433);
#7315=CONICAL_SURFACE('',#31884,0.25,0.0174532925199433);
#7316=CONICAL_SURFACE('',#31886,0.25,0.0174532925199433);
#7317=CONICAL_SURFACE('',#31888,0.25,0.0174532925199433);
#7318=CONICAL_SURFACE('',#31890,0.25,0.0174532925199433);
#7319=CONICAL_SURFACE('',#31892,0.25,0.0174532925199433);
#7320=CONICAL_SURFACE('',#31894,0.25,0.0174532925199433);
#7321=CONICAL_SURFACE('',#31896,0.25,0.0174532925199433);
#7322=CONICAL_SURFACE('',#31899,0.25,0.0174532925199433);
#7323=CONICAL_SURFACE('',#31901,0.25,0.0174532925199433);
#7324=CONICAL_SURFACE('',#31903,0.25,0.0174532925199433);
#7325=CONICAL_SURFACE('',#31905,0.25,0.0174532925199433);
#7326=CONICAL_SURFACE('',#31907,0.25,0.0174532925199433);
#7327=CONICAL_SURFACE('',#31909,0.25,0.0174532925199433);
#7328=CONICAL_SURFACE('',#31911,0.25,0.0174532925199433);
#7329=CONICAL_SURFACE('',#31913,0.25,0.0174532925199433);
#7330=CONICAL_SURFACE('',#31915,0.25,0.0174532925199433);
#7331=CONICAL_SURFACE('',#31917,0.25,0.0174532925199433);
#7332=CONICAL_SURFACE('',#31919,0.25,0.0174532925199433);
#7333=CONICAL_SURFACE('',#31921,0.25,0.0174532925199433);
#7334=CONICAL_SURFACE('',#31923,0.25,0.0174532925199433);
#7335=CONICAL_SURFACE('',#31925,0.25,0.0174532925199433);
#7336=CONICAL_SURFACE('',#31927,0.25,0.0174532925199433);
#7337=CONICAL_SURFACE('',#31929,0.25,0.0174532925199433);
#7338=CONICAL_SURFACE('',#31931,0.25,0.0174532925199433);
#7339=CONICAL_SURFACE('',#31933,0.25,0.0174532925199433);
#7340=CONICAL_SURFACE('',#31936,0.25,0.0174532925199433);
#7341=CONICAL_SURFACE('',#31938,0.25,0.0174532925199433);
#7342=CONICAL_SURFACE('',#31941,0.25,0.0174532925199433);
#7343=CONICAL_SURFACE('',#31944,0.25,0.0174532925199433);
#7344=CONICAL_SURFACE('',#31946,43.18,0.0174532925199433);
#7345=CONICAL_SURFACE('',#31948,43.18,0.0174532925199433);
#7346=CONICAL_SURFACE('',#31949,43.18,0.0174532925199433);
#7347=CONICAL_SURFACE('',#31950,43.18,0.0174532925199433);
#7348=CONICAL_SURFACE('',#31951,0.25,0.0174532925199433);
#7349=CONICAL_SURFACE('',#31952,0.25,0.0174532925199433);
#7350=CONICAL_SURFACE('',#31953,0.25,0.0174532925199433);
#7351=CONICAL_SURFACE('',#31955,0.25,0.0174532925199433);
#7352=CONICAL_SURFACE('',#31957,0.25,0.0174532925199433);
#7353=CONICAL_SURFACE('',#31958,0.25,0.0174532925199433);
#7354=CONICAL_SURFACE('',#31960,0.25,0.0174532925199433);
#7355=CONICAL_SURFACE('',#31961,0.25,0.0174532925199433);
#7356=CONICAL_SURFACE('',#31963,0.25,0.0174532925199433);
#7357=CONICAL_SURFACE('',#31964,0.25,0.0174532925199433);
#7358=CONICAL_SURFACE('',#31966,0.25,0.0174532925199433);
#7359=CONICAL_SURFACE('',#31967,0.25,0.0174532925199433);
#7360=CONICAL_SURFACE('',#31969,0.25,0.0174532925199433);
#7361=CONICAL_SURFACE('',#31970,0.25,0.0174532925199433);
#7362=CONICAL_SURFACE('',#31972,0.25,0.0174532925199433);
#7363=CONICAL_SURFACE('',#31974,0.25,0.0174532925199433);
#7364=CONICAL_SURFACE('',#31976,0.25,0.0174532925199433);
#7365=CONICAL_SURFACE('',#31977,0.25,0.0174532925199433);
#7366=CONICAL_SURFACE('',#31979,0.25,0.0174532925199433);
#7367=CONICAL_SURFACE('',#31981,0.25,0.0174532925199433);
#7368=CONICAL_SURFACE('',#31983,0.25,0.0174532925199433);
#7369=CONICAL_SURFACE('',#31985,0.25,0.0174532925199433);
#7370=CONICAL_SURFACE('',#31987,0.25,0.0174532925199433);
#7371=CONICAL_SURFACE('',#31989,0.25,0.0174532925199433);
#7372=CONICAL_SURFACE('',#31991,0.25,0.0174532925199433);
#7373=CONICAL_SURFACE('',#31994,0.25,0.0174532925199433);
#7374=CONICAL_SURFACE('',#31996,0.25,0.0174532925199433);
#7375=CONICAL_SURFACE('',#31998,0.25,0.0174532925199433);
#7376=CONICAL_SURFACE('',#32000,0.25,0.0174532925199433);
#7377=CONICAL_SURFACE('',#32002,0.25,0.0174532925199433);
#7378=CONICAL_SURFACE('',#32004,0.25,0.0174532925199433);
#7379=CONICAL_SURFACE('',#32006,0.25,0.0174532925199433);
#7380=CONICAL_SURFACE('',#32008,0.25,0.0174532925199433);
#7381=CONICAL_SURFACE('',#32010,0.25,0.0174532925199433);
#7382=CONICAL_SURFACE('',#32012,0.25,0.0174532925199433);
#7383=CONICAL_SURFACE('',#32014,0.25,0.0174532925199433);
#7384=CONICAL_SURFACE('',#32016,0.25,0.0174532925199433);
#7385=CONICAL_SURFACE('',#32018,0.25,0.0174532925199433);
#7386=CONICAL_SURFACE('',#32020,0.25,0.0174532925199433);
#7387=CONICAL_SURFACE('',#32022,0.25,0.0174532925199433);
#7388=CONICAL_SURFACE('',#32024,0.25,0.0174532925199433);
#7389=CONICAL_SURFACE('',#32026,0.25,0.0174532925199433);
#7390=CONICAL_SURFACE('',#32027,0.25,0.0174532925199433);
#7391=CONICAL_SURFACE('',#32029,0.25,0.0174532925199433);
#7392=CONICAL_SURFACE('',#32031,0.25,0.0174532925199433);
#7393=CONICAL_SURFACE('',#32033,0.25,0.0174532925199433);
#7394=CONICAL_SURFACE('',#32035,0.25,0.0174532925199433);
#7395=CONICAL_SURFACE('',#32037,0.25,0.0174532925199433);
#7396=CONICAL_SURFACE('',#32039,0.25,0.0174532925199433);
#7397=CONICAL_SURFACE('',#32041,0.25,0.0174532925199433);
#7398=CONICAL_SURFACE('',#32044,0.25,0.0174532925199433);
#7399=CONICAL_SURFACE('',#32046,0.25,0.0174532925199433);
#7400=CONICAL_SURFACE('',#32048,0.25,0.0174532925199433);
#7401=CONICAL_SURFACE('',#32050,0.25,0.0174532925199433);
#7402=CONICAL_SURFACE('',#32052,0.25,0.0174532925199433);
#7403=CONICAL_SURFACE('',#32054,0.25,0.0174532925199433);
#7404=CONICAL_SURFACE('',#32056,0.25,0.0174532925199433);
#7405=CONICAL_SURFACE('',#32058,0.25,0.0174532925199433);
#7406=CONICAL_SURFACE('',#32060,0.25,0.0174532925199433);
#7407=CONICAL_SURFACE('',#32062,0.25,0.0174532925199433);
#7408=CONICAL_SURFACE('',#32064,0.25,0.0174532925199433);
#7409=CONICAL_SURFACE('',#32066,0.25,0.0174532925199433);
#7410=CONICAL_SURFACE('',#32068,0.25,0.0174532925199433);
#7411=CONICAL_SURFACE('',#32069,0.25,0.0174532925199433);
#7412=CONICAL_SURFACE('',#32071,0.25,0.0174532925199433);
#7413=CONICAL_SURFACE('',#32073,0.25,0.0174532925199433);
#7414=CONICAL_SURFACE('',#32075,0.25,0.0174532925199433);
#7415=CONICAL_SURFACE('',#32077,0.25,0.0174532925199433);
#7416=CONICAL_SURFACE('',#32079,0.25,0.0174532925199433);
#7417=CONICAL_SURFACE('',#32081,0.25,0.0174532925199433);
#7418=CONICAL_SURFACE('',#32083,0.25,0.0174532925199433);
#7419=CONICAL_SURFACE('',#32085,0.25,0.0174532925199433);
#7420=CONICAL_SURFACE('',#32087,0.25,0.0174532925199433);
#7421=CONICAL_SURFACE('',#32089,0.25,0.0174532925199433);
#7422=CONICAL_SURFACE('',#32091,0.25,0.0174532925199433);
#7423=CONICAL_SURFACE('',#32093,0.25,0.0174532925199433);
#7424=CONICAL_SURFACE('',#32095,0.25,0.0174532925199433);
#7425=CONICAL_SURFACE('',#32097,0.25,0.0174532925199433);
#7426=CONICAL_SURFACE('',#32099,0.25,0.0174532925199433);
#7427=CONICAL_SURFACE('',#32101,0.25,0.0174532925199433);
#7428=CONICAL_SURFACE('',#32104,0.25,0.0174532925199433);
#7429=CONICAL_SURFACE('',#32106,0.25,0.0174532925199433);
#7430=CONICAL_SURFACE('',#32108,0.25,0.0174532925199433);
#7431=CONICAL_SURFACE('',#32110,0.25,0.0174532925199433);
#7432=CONICAL_SURFACE('',#32112,0.25,0.0174532925199433);
#7433=CONICAL_SURFACE('',#32114,0.25,0.0174532925199433);
#7434=CONICAL_SURFACE('',#32116,0.25,0.0174532925199433);
#7435=CONICAL_SURFACE('',#32117,43.18,0.0174532925199433);
#7436=CONICAL_SURFACE('',#32118,43.18,0.0174532925199433);
#7437=CONICAL_SURFACE('',#32120,43.18,0.0174532925199433);
#7438=CONICAL_SURFACE('',#32121,43.18,0.0174532925199433);
#7439=CONICAL_SURFACE('',#32125,0.25,0.0174532925199433);
#7440=CONICAL_SURFACE('',#32126,0.25,0.0174532925199433);
#7441=CONICAL_SURFACE('',#32129,0.25,0.0174532925199433);
#7442=CONICAL_SURFACE('',#32133,0.25,0.0174532925199433);
#7443=CONICAL_SURFACE('',#32134,0.25,0.0174532925199433);
#7444=CONICAL_SURFACE('',#32138,0.25,0.0174532925199433);
#7445=CONICAL_SURFACE('',#32139,0.25,0.0174532925199433);
#7446=CONICAL_SURFACE('',#32143,0.25,0.0174532925199433);
#7447=CONICAL_SURFACE('',#32144,0.25,0.0174532925199433);
#7448=CONICAL_SURFACE('',#32148,0.25,0.0174532925199433);
#7449=CONICAL_SURFACE('',#32149,0.25,0.0174532925199433);
#7450=CONICAL_SURFACE('',#32153,0.25,0.0174532925199433);
#7451=CONICAL_SURFACE('',#32154,0.25,0.0174532925199433);
#7452=CONICAL_SURFACE('',#32157,0.25,0.0174532925199433);
#7453=CONICAL_SURFACE('',#32159,0.25,0.0174532925199433);
#7454=CONICAL_SURFACE('',#32161,0.25,0.0174532925199433);
#7455=CONICAL_SURFACE('',#32163,0.25,0.0174532925199433);
#7456=CONICAL_SURFACE('',#32165,0.25,0.0174532925199433);
#7457=CONICAL_SURFACE('',#32167,0.25,0.0174532925199433);
#7458=CONICAL_SURFACE('',#32169,0.25,0.0174532925199433);
#7459=CONICAL_SURFACE('',#32171,0.25,0.0174532925199433);
#7460=CONICAL_SURFACE('',#32173,0.25,0.0174532925199433);
#7461=CONICAL_SURFACE('',#32176,0.25,0.0174532925199433);
#7462=CONICAL_SURFACE('',#32178,0.25,0.0174532925199433);
#7463=CONICAL_SURFACE('',#32180,0.25,0.0174532925199433);
#7464=CONICAL_SURFACE('',#32182,0.25,0.0174532925199433);
#7465=CONICAL_SURFACE('',#32184,0.25,0.0174532925199433);
#7466=CONICAL_SURFACE('',#32186,0.25,0.0174532925199433);
#7467=CONICAL_SURFACE('',#32188,0.25,0.0174532925199433);
#7468=CONICAL_SURFACE('',#32190,0.25,0.0174532925199433);
#7469=CONICAL_SURFACE('',#32192,0.25,0.0174532925199433);
#7470=CONICAL_SURFACE('',#32194,0.249999999999999,0.0174532925199433);
#7471=CONICAL_SURFACE('',#32196,0.249999999999999,0.0174532925199433);
#7472=CONICAL_SURFACE('',#32198,0.25,0.0174532925199433);
#7473=CONICAL_SURFACE('',#32200,0.25,0.0174532925199433);
#7474=CONICAL_SURFACE('',#32202,0.249999999999999,0.0174532925199433);
#7475=CONICAL_SURFACE('',#32205,0.25,0.0174532925199433);
#7476=CONICAL_SURFACE('',#32207,0.25,0.0174532925199433);
#7477=CONICAL_SURFACE('',#32209,0.25,0.0174532925199433);
#7478=CONICAL_SURFACE('',#32211,0.25,0.0174532925199433);
#7479=CONICAL_SURFACE('',#32213,0.25,0.0174532925199433);
#7480=CONICAL_SURFACE('',#32215,0.25,0.0174532925199433);
#7481=CONICAL_SURFACE('',#32217,0.25,0.0174532925199433);
#7482=CONICAL_SURFACE('',#32219,0.25,0.0174532925199433);
#7483=CONICAL_SURFACE('',#32221,0.25,0.0174532925199433);
#7484=CONICAL_SURFACE('',#32224,0.25,0.0174532925199433);
#7485=CONICAL_SURFACE('',#32226,0.25,0.0174532925199433);
#7486=CONICAL_SURFACE('',#32228,0.25,0.0174532925199433);
#7487=CONICAL_SURFACE('',#32230,0.25,0.0174532925199433);
#7488=CONICAL_SURFACE('',#32232,0.25,0.0174532925199433);
#7489=CONICAL_SURFACE('',#32234,0.25,0.0174532925199433);
#7490=CONICAL_SURFACE('',#32236,0.25,0.0174532925199433);
#7491=CONICAL_SURFACE('',#32238,0.25,0.0174532925199433);
#7492=CONICAL_SURFACE('',#32240,0.25,0.0174532925199433);
#7493=CONICAL_SURFACE('',#32242,0.25,0.0174532925199433);
#7494=CONICAL_SURFACE('',#32245,0.25,0.0174532925199433);
#7495=CONICAL_SURFACE('',#32247,0.25,0.0174532925199433);
#7496=CONICAL_SURFACE('',#32249,0.25,0.0174532925199433);
#7497=CONICAL_SURFACE('',#32251,0.25,0.0174532925199433);
#7498=CONICAL_SURFACE('',#32253,0.25,0.0174532925199433);
#7499=CONICAL_SURFACE('',#32255,0.25,0.0174532925199433);
#7500=CONICAL_SURFACE('',#32257,0.25,0.0174532925199433);
#7501=CONICAL_SURFACE('',#32259,0.25,0.0174532925199433);
#7502=CONICAL_SURFACE('',#32261,0.25,0.0174532925199433);
#7503=CONICAL_SURFACE('',#32263,0.25,0.0174532925199433);
#7504=CONICAL_SURFACE('',#32265,0.25,0.0174532925199433);
#7505=CONICAL_SURFACE('',#32267,0.25,0.0174532925199433);
#7506=CONICAL_SURFACE('',#32269,0.25,0.0174532925199433);
#7507=CONICAL_SURFACE('',#32271,0.25,0.0174532925199433);
#7508=CONICAL_SURFACE('',#32273,0.25,0.0174532925199433);
#7509=CONICAL_SURFACE('',#32275,0.25,0.0174532925199433);
#7510=CONICAL_SURFACE('',#32277,0.25,0.0174532925199433);
#7511=CONICAL_SURFACE('',#32279,0.25,0.0174532925199433);
#7512=CONICAL_SURFACE('',#32282,0.25,0.0174532925199433);
#7513=CONICAL_SURFACE('',#32284,0.25,0.0174532925199433);
#7514=CONICAL_SURFACE('',#32287,0.25,0.0174532925199433);
#7515=CONICAL_SURFACE('',#32290,0.25,0.0174532925199433);
#7516=CONICAL_SURFACE('',#32292,43.18,0.0174532925199433);
#7517=CONICAL_SURFACE('',#32294,43.18,0.0174532925199433);
#7518=CONICAL_SURFACE('',#32295,43.18,0.0174532925199433);
#7519=CONICAL_SURFACE('',#32296,43.18,0.0174532925199433);
#7520=CONICAL_SURFACE('',#32297,0.25,0.0174532925199433);
#7521=CONICAL_SURFACE('',#32298,0.25,0.0174532925199433);
#7522=CONICAL_SURFACE('',#32300,0.25,0.0174532925199433);
#7523=CONICAL_SURFACE('',#32302,0.25,0.0174532925199433);
#7524=CONICAL_SURFACE('',#32303,0.25,0.0174532925199433);
#7525=CONICAL_SURFACE('',#32305,0.25,0.0174532925199433);
#7526=CONICAL_SURFACE('',#32306,0.25,0.0174532925199433);
#7527=CONICAL_SURFACE('',#32308,0.25,0.0174532925199433);
#7528=CONICAL_SURFACE('',#32309,0.25,0.0174532925199433);
#7529=CONICAL_SURFACE('',#32311,0.25,0.0174532925199433);
#7530=CONICAL_SURFACE('',#32312,0.25,0.0174532925199433);
#7531=CONICAL_SURFACE('',#32314,0.25,0.0174532925199433);
#7532=CONICAL_SURFACE('',#32315,0.25,0.0174532925199433);
#7533=CONICAL_SURFACE('',#32318,0.25,0.0174532925199433);
#7534=CONICAL_SURFACE('',#32320,0.25,0.0174532925199433);
#7535=CONICAL_SURFACE('',#32322,0.25,0.0174532925199433);
#7536=CONICAL_SURFACE('',#32324,0.25,0.0174532925199433);
#7537=CONICAL_SURFACE('',#32326,0.25,0.0174532925199433);
#7538=CONICAL_SURFACE('',#32328,0.25,0.0174532925199433);
#7539=CONICAL_SURFACE('',#32330,0.25,0.0174532925199433);
#7540=CONICAL_SURFACE('',#32332,0.25,0.0174532925199433);
#7541=CONICAL_SURFACE('',#32334,0.25,0.0174532925199433);
#7542=CONICAL_SURFACE('',#32337,0.25,0.0174532925199433);
#7543=CONICAL_SURFACE('',#32339,0.25,0.0174532925199433);
#7544=CONICAL_SURFACE('',#32341,0.25,0.0174532925199433);
#7545=CONICAL_SURFACE('',#32343,0.25,0.0174532925199433);
#7546=CONICAL_SURFACE('',#32345,0.25,0.0174532925199433);
#7547=CONICAL_SURFACE('',#32347,0.25,0.0174532925199433);
#7548=CONICAL_SURFACE('',#32349,0.25,0.0174532925199433);
#7549=CONICAL_SURFACE('',#32351,0.25,0.0174532925199433);
#7550=CONICAL_SURFACE('',#32353,0.25,0.0174532925199433);
#7551=CONICAL_SURFACE('',#32355,0.249999999999999,0.0174532925199433);
#7552=CONICAL_SURFACE('',#32357,0.249999999999999,0.0174532925199433);
#7553=CONICAL_SURFACE('',#32359,0.25,0.0174532925199433);
#7554=CONICAL_SURFACE('',#32361,0.25,0.0174532925199433);
#7555=CONICAL_SURFACE('',#32363,0.249999999999999,0.0174532925199433);
#7556=CONICAL_SURFACE('',#32366,0.25,0.0174532925199433);
#7557=CONICAL_SURFACE('',#32368,0.25,0.0174532925199433);
#7558=CONICAL_SURFACE('',#32370,0.25,0.0174532925199433);
#7559=CONICAL_SURFACE('',#32372,0.25,0.0174532925199433);
#7560=CONICAL_SURFACE('',#32374,0.25,0.0174532925199433);
#7561=CONICAL_SURFACE('',#32376,0.25,0.0174532925199433);
#7562=CONICAL_SURFACE('',#32378,0.25,0.0174532925199433);
#7563=CONICAL_SURFACE('',#32380,0.25,0.0174532925199433);
#7564=CONICAL_SURFACE('',#32382,0.25,0.0174532925199433);
#7565=CONICAL_SURFACE('',#32385,0.25,0.0174532925199433);
#7566=CONICAL_SURFACE('',#32387,0.25,0.0174532925199433);
#7567=CONICAL_SURFACE('',#32389,0.25,0.0174532925199433);
#7568=CONICAL_SURFACE('',#32391,0.25,0.0174532925199433);
#7569=CONICAL_SURFACE('',#32393,0.25,0.0174532925199433);
#7570=CONICAL_SURFACE('',#32395,0.25,0.0174532925199433);
#7571=CONICAL_SURFACE('',#32397,0.25,0.0174532925199433);
#7572=CONICAL_SURFACE('',#32399,0.25,0.0174532925199433);
#7573=CONICAL_SURFACE('',#32401,0.25,0.0174532925199433);
#7574=CONICAL_SURFACE('',#32403,0.25,0.0174532925199433);
#7575=CONICAL_SURFACE('',#32406,0.25,0.0174532925199433);
#7576=CONICAL_SURFACE('',#32408,0.25,0.0174532925199433);
#7577=CONICAL_SURFACE('',#32410,0.25,0.0174532925199433);
#7578=CONICAL_SURFACE('',#32412,0.25,0.0174532925199433);
#7579=CONICAL_SURFACE('',#32414,0.25,0.0174532925199433);
#7580=CONICAL_SURFACE('',#32416,0.25,0.0174532925199433);
#7581=CONICAL_SURFACE('',#32418,0.25,0.0174532925199433);
#7582=CONICAL_SURFACE('',#32420,0.25,0.0174532925199433);
#7583=CONICAL_SURFACE('',#32422,0.25,0.0174532925199433);
#7584=CONICAL_SURFACE('',#32424,0.25,0.0174532925199433);
#7585=CONICAL_SURFACE('',#32426,0.25,0.0174532925199433);
#7586=CONICAL_SURFACE('',#32428,0.25,0.0174532925199433);
#7587=CONICAL_SURFACE('',#32430,0.25,0.0174532925199433);
#7588=CONICAL_SURFACE('',#32432,0.25,0.0174532925199433);
#7589=CONICAL_SURFACE('',#32434,0.25,0.0174532925199433);
#7590=CONICAL_SURFACE('',#32436,0.25,0.0174532925199433);
#7591=CONICAL_SURFACE('',#32438,0.25,0.0174532925199433);
#7592=CONICAL_SURFACE('',#32440,0.25,0.0174532925199433);
#7593=CONICAL_SURFACE('',#32443,0.25,0.0174532925199433);
#7594=CONICAL_SURFACE('',#32445,0.25,0.0174532925199433);
#7595=CONICAL_SURFACE('',#32448,0.25,0.0174532925199433);
#7596=CONICAL_SURFACE('',#32451,0.25,0.0174532925199433);
#7597=CONICAL_SURFACE('',#32453,43.18,0.0174532925199433);
#7598=CONICAL_SURFACE('',#32455,43.18,0.0174532925199433);
#7599=CONICAL_SURFACE('',#32456,43.18,0.0174532925199433);
#7600=FACE_OUTER_BOUND('',#9060,.T.);
#7601=FACE_OUTER_BOUND('',#9061,.T.);
#7602=FACE_OUTER_BOUND('',#9062,.T.);
#7603=FACE_OUTER_BOUND('',#9063,.T.);
#7604=FACE_OUTER_BOUND('',#9064,.T.);
#7605=FACE_OUTER_BOUND('',#9065,.T.);
#7606=FACE_OUTER_BOUND('',#9066,.T.);
#7607=FACE_OUTER_BOUND('',#9067,.T.);
#7608=FACE_OUTER_BOUND('',#9245,.T.);
#7609=FACE_OUTER_BOUND('',#9431,.T.);
#7610=FACE_OUTER_BOUND('',#9432,.T.);
#7611=FACE_OUTER_BOUND('',#9433,.T.);
#7612=FACE_OUTER_BOUND('',#9434,.T.);
#7613=FACE_OUTER_BOUND('',#9435,.T.);
#7614=FACE_OUTER_BOUND('',#9436,.T.);
#7615=FACE_OUTER_BOUND('',#9437,.T.);
#7616=FACE_OUTER_BOUND('',#9438,.T.);
#7617=FACE_OUTER_BOUND('',#9439,.T.);
#7618=FACE_OUTER_BOUND('',#9440,.T.);
#7619=FACE_OUTER_BOUND('',#9441,.T.);
#7620=FACE_OUTER_BOUND('',#9442,.T.);
#7621=FACE_OUTER_BOUND('',#9443,.T.);
#7622=FACE_OUTER_BOUND('',#9444,.T.);
#7623=FACE_OUTER_BOUND('',#9445,.T.);
#7624=FACE_OUTER_BOUND('',#9446,.T.);
#7625=FACE_OUTER_BOUND('',#9447,.T.);
#7626=FACE_OUTER_BOUND('',#9448,.T.);
#7627=FACE_OUTER_BOUND('',#9449,.T.);
#7628=FACE_OUTER_BOUND('',#9450,.T.);
#7629=FACE_OUTER_BOUND('',#9451,.T.);
#7630=FACE_OUTER_BOUND('',#9452,.T.);
#7631=FACE_OUTER_BOUND('',#9453,.T.);
#7632=FACE_OUTER_BOUND('',#9454,.T.);
#7633=FACE_OUTER_BOUND('',#9455,.T.);
#7634=FACE_OUTER_BOUND('',#9456,.T.);
#7635=FACE_OUTER_BOUND('',#9457,.T.);
#7636=FACE_OUTER_BOUND('',#9458,.T.);
#7637=FACE_OUTER_BOUND('',#9459,.T.);
#7638=FACE_OUTER_BOUND('',#9460,.T.);
#7639=FACE_OUTER_BOUND('',#9461,.T.);
#7640=FACE_OUTER_BOUND('',#9462,.T.);
#7641=FACE_OUTER_BOUND('',#9463,.T.);
#7642=FACE_OUTER_BOUND('',#9464,.T.);
#7643=FACE_OUTER_BOUND('',#9465,.T.);
#7644=FACE_OUTER_BOUND('',#9466,.T.);
#7645=FACE_OUTER_BOUND('',#9467,.T.);
#7646=FACE_OUTER_BOUND('',#9468,.T.);
#7647=FACE_OUTER_BOUND('',#9469,.T.);
#7648=FACE_OUTER_BOUND('',#9470,.T.);
#7649=FACE_OUTER_BOUND('',#9471,.T.);
#7650=FACE_OUTER_BOUND('',#9472,.T.);
#7651=FACE_OUTER_BOUND('',#9473,.T.);
#7652=FACE_OUTER_BOUND('',#9474,.T.);
#7653=FACE_OUTER_BOUND('',#9475,.T.);
#7654=FACE_OUTER_BOUND('',#9476,.T.);
#7655=FACE_OUTER_BOUND('',#9477,.T.);
#7656=FACE_OUTER_BOUND('',#9478,.T.);
#7657=FACE_OUTER_BOUND('',#9479,.T.);
#7658=FACE_OUTER_BOUND('',#9480,.T.);
#7659=FACE_OUTER_BOUND('',#9481,.T.);
#7660=FACE_OUTER_BOUND('',#9482,.T.);
#7661=FACE_OUTER_BOUND('',#9483,.T.);
#7662=FACE_OUTER_BOUND('',#9484,.T.);
#7663=FACE_OUTER_BOUND('',#9485,.T.);
#7664=FACE_OUTER_BOUND('',#9486,.T.);
#7665=FACE_OUTER_BOUND('',#9487,.T.);
#7666=FACE_OUTER_BOUND('',#9488,.T.);
#7667=FACE_OUTER_BOUND('',#9489,.T.);
#7668=FACE_OUTER_BOUND('',#9490,.T.);
#7669=FACE_OUTER_BOUND('',#9491,.T.);
#7670=FACE_OUTER_BOUND('',#9492,.T.);
#7671=FACE_OUTER_BOUND('',#9493,.T.);
#7672=FACE_OUTER_BOUND('',#9494,.T.);
#7673=FACE_OUTER_BOUND('',#9495,.T.);
#7674=FACE_OUTER_BOUND('',#9496,.T.);
#7675=FACE_OUTER_BOUND('',#9497,.T.);
#7676=FACE_OUTER_BOUND('',#9498,.T.);
#7677=FACE_OUTER_BOUND('',#9499,.T.);
#7678=FACE_OUTER_BOUND('',#9500,.T.);
#7679=FACE_OUTER_BOUND('',#9501,.T.);
#7680=FACE_OUTER_BOUND('',#9502,.T.);
#7681=FACE_OUTER_BOUND('',#9503,.T.);
#7682=FACE_OUTER_BOUND('',#9504,.T.);
#7683=FACE_OUTER_BOUND('',#9505,.T.);
#7684=FACE_OUTER_BOUND('',#9506,.T.);
#7685=FACE_OUTER_BOUND('',#9507,.T.);
#7686=FACE_OUTER_BOUND('',#9508,.T.);
#7687=FACE_OUTER_BOUND('',#9509,.T.);
#7688=FACE_OUTER_BOUND('',#9510,.T.);
#7689=FACE_OUTER_BOUND('',#9511,.T.);
#7690=FACE_OUTER_BOUND('',#9512,.T.);
#7691=FACE_OUTER_BOUND('',#9513,.T.);
#7692=FACE_OUTER_BOUND('',#9514,.T.);
#7693=FACE_OUTER_BOUND('',#9515,.T.);
#7694=FACE_OUTER_BOUND('',#9516,.T.);
#7695=FACE_OUTER_BOUND('',#9517,.T.);
#7696=FACE_OUTER_BOUND('',#9518,.T.);
#7697=FACE_OUTER_BOUND('',#9519,.T.);
#7698=FACE_OUTER_BOUND('',#9520,.T.);
#7699=FACE_OUTER_BOUND('',#9521,.T.);
#7700=FACE_OUTER_BOUND('',#9522,.T.);
#7701=FACE_OUTER_BOUND('',#9523,.T.);
#7702=FACE_OUTER_BOUND('',#9524,.T.);
#7703=FACE_OUTER_BOUND('',#9525,.T.);
#7704=FACE_OUTER_BOUND('',#9526,.T.);
#7705=FACE_OUTER_BOUND('',#9527,.T.);
#7706=FACE_OUTER_BOUND('',#9528,.T.);
#7707=FACE_OUTER_BOUND('',#9529,.T.);
#7708=FACE_OUTER_BOUND('',#9530,.T.);
#7709=FACE_OUTER_BOUND('',#9531,.T.);
#7710=FACE_OUTER_BOUND('',#9532,.T.);
#7711=FACE_OUTER_BOUND('',#9533,.T.);
#7712=FACE_OUTER_BOUND('',#9534,.T.);
#7713=FACE_OUTER_BOUND('',#9535,.T.);
#7714=FACE_OUTER_BOUND('',#9536,.T.);
#7715=FACE_OUTER_BOUND('',#9537,.T.);
#7716=FACE_OUTER_BOUND('',#9538,.T.);
#7717=FACE_OUTER_BOUND('',#9539,.T.);
#7718=FACE_OUTER_BOUND('',#9540,.T.);
#7719=FACE_OUTER_BOUND('',#9541,.T.);
#7720=FACE_OUTER_BOUND('',#9542,.T.);
#7721=FACE_OUTER_BOUND('',#9543,.T.);
#7722=FACE_OUTER_BOUND('',#9544,.T.);
#7723=FACE_OUTER_BOUND('',#9545,.T.);
#7724=FACE_OUTER_BOUND('',#9546,.T.);
#7725=FACE_OUTER_BOUND('',#9547,.T.);
#7726=FACE_OUTER_BOUND('',#9548,.T.);
#7727=FACE_OUTER_BOUND('',#9549,.T.);
#7728=FACE_OUTER_BOUND('',#9550,.T.);
#7729=FACE_OUTER_BOUND('',#9551,.T.);
#7730=FACE_OUTER_BOUND('',#9552,.T.);
#7731=FACE_OUTER_BOUND('',#9553,.T.);
#7732=FACE_OUTER_BOUND('',#9554,.T.);
#7733=FACE_OUTER_BOUND('',#9555,.T.);
#7734=FACE_OUTER_BOUND('',#9556,.T.);
#7735=FACE_OUTER_BOUND('',#9557,.T.);
#7736=FACE_OUTER_BOUND('',#9558,.T.);
#7737=FACE_OUTER_BOUND('',#9559,.T.);
#7738=FACE_OUTER_BOUND('',#9560,.T.);
#7739=FACE_OUTER_BOUND('',#9561,.T.);
#7740=FACE_OUTER_BOUND('',#9562,.T.);
#7741=FACE_OUTER_BOUND('',#9563,.T.);
#7742=FACE_OUTER_BOUND('',#9564,.T.);
#7743=FACE_OUTER_BOUND('',#9565,.T.);
#7744=FACE_OUTER_BOUND('',#9566,.T.);
#7745=FACE_OUTER_BOUND('',#9567,.T.);
#7746=FACE_OUTER_BOUND('',#9568,.T.);
#7747=FACE_OUTER_BOUND('',#9569,.T.);
#7748=FACE_OUTER_BOUND('',#9570,.T.);
#7749=FACE_OUTER_BOUND('',#9571,.T.);
#7750=FACE_OUTER_BOUND('',#9572,.T.);
#7751=FACE_OUTER_BOUND('',#9573,.T.);
#7752=FACE_OUTER_BOUND('',#9574,.T.);
#7753=FACE_OUTER_BOUND('',#9575,.T.);
#7754=FACE_OUTER_BOUND('',#9576,.T.);
#7755=FACE_OUTER_BOUND('',#9577,.T.);
#7756=FACE_OUTER_BOUND('',#9578,.T.);
#7757=FACE_OUTER_BOUND('',#9579,.T.);
#7758=FACE_OUTER_BOUND('',#9580,.T.);
#7759=FACE_OUTER_BOUND('',#9581,.T.);
#7760=FACE_OUTER_BOUND('',#9582,.T.);
#7761=FACE_OUTER_BOUND('',#9583,.T.);
#7762=FACE_OUTER_BOUND('',#9584,.T.);
#7763=FACE_OUTER_BOUND('',#9585,.T.);
#7764=FACE_OUTER_BOUND('',#9586,.T.);
#7765=FACE_OUTER_BOUND('',#9587,.T.);
#7766=FACE_OUTER_BOUND('',#9588,.T.);
#7767=FACE_OUTER_BOUND('',#9589,.T.);
#7768=FACE_OUTER_BOUND('',#9590,.T.);
#7769=FACE_OUTER_BOUND('',#9591,.T.);
#7770=FACE_OUTER_BOUND('',#9592,.T.);
#7771=FACE_OUTER_BOUND('',#9593,.T.);
#7772=FACE_OUTER_BOUND('',#9594,.T.);
#7773=FACE_OUTER_BOUND('',#9595,.T.);
#7774=FACE_OUTER_BOUND('',#9596,.T.);
#7775=FACE_OUTER_BOUND('',#9597,.T.);
#7776=FACE_OUTER_BOUND('',#9598,.T.);
#7777=FACE_OUTER_BOUND('',#9599,.T.);
#7778=FACE_OUTER_BOUND('',#9600,.T.);
#7779=FACE_OUTER_BOUND('',#9601,.T.);
#7780=FACE_OUTER_BOUND('',#9602,.T.);
#7781=FACE_OUTER_BOUND('',#9603,.T.);
#7782=FACE_OUTER_BOUND('',#9604,.T.);
#7783=FACE_OUTER_BOUND('',#9605,.T.);
#7784=FACE_OUTER_BOUND('',#9606,.T.);
#7785=FACE_OUTER_BOUND('',#9607,.T.);
#7786=FACE_OUTER_BOUND('',#9608,.T.);
#7787=FACE_OUTER_BOUND('',#9609,.T.);
#7788=FACE_OUTER_BOUND('',#9610,.T.);
#7789=FACE_OUTER_BOUND('',#9611,.T.);
#7790=FACE_OUTER_BOUND('',#9612,.T.);
#7791=FACE_OUTER_BOUND('',#9613,.T.);
#7792=FACE_OUTER_BOUND('',#9614,.T.);
#7793=FACE_OUTER_BOUND('',#9615,.T.);
#7794=FACE_OUTER_BOUND('',#9616,.T.);
#7795=FACE_OUTER_BOUND('',#9617,.T.);
#7796=FACE_OUTER_BOUND('',#9619,.T.);
#7797=FACE_OUTER_BOUND('',#9621,.T.);
#7798=FACE_OUTER_BOUND('',#9623,.T.);
#7799=FACE_OUTER_BOUND('',#9624,.T.);
#7800=FACE_OUTER_BOUND('',#9625,.T.);
#7801=FACE_OUTER_BOUND('',#9626,.T.);
#7802=FACE_OUTER_BOUND('',#9627,.T.);
#7803=FACE_OUTER_BOUND('',#9628,.T.);
#7804=FACE_OUTER_BOUND('',#9629,.T.);
#7805=FACE_OUTER_BOUND('',#9630,.T.);
#7806=FACE_OUTER_BOUND('',#9631,.T.);
#7807=FACE_OUTER_BOUND('',#9632,.T.);
#7808=FACE_OUTER_BOUND('',#9633,.T.);
#7809=FACE_OUTER_BOUND('',#9634,.T.);
#7810=FACE_OUTER_BOUND('',#9635,.T.);
#7811=FACE_OUTER_BOUND('',#9636,.T.);
#7812=FACE_OUTER_BOUND('',#9637,.T.);
#7813=FACE_OUTER_BOUND('',#9638,.T.);
#7814=FACE_OUTER_BOUND('',#9639,.T.);
#7815=FACE_OUTER_BOUND('',#9640,.T.);
#7816=FACE_OUTER_BOUND('',#9641,.T.);
#7817=FACE_OUTER_BOUND('',#9642,.T.);
#7818=FACE_OUTER_BOUND('',#9643,.T.);
#7819=FACE_OUTER_BOUND('',#9644,.T.);
#7820=FACE_OUTER_BOUND('',#9645,.T.);
#7821=FACE_OUTER_BOUND('',#9646,.T.);
#7822=FACE_OUTER_BOUND('',#9647,.T.);
#7823=FACE_OUTER_BOUND('',#9648,.T.);
#7824=FACE_OUTER_BOUND('',#9649,.T.);
#7825=FACE_OUTER_BOUND('',#9650,.T.);
#7826=FACE_OUTER_BOUND('',#9651,.T.);
#7827=FACE_OUTER_BOUND('',#9652,.T.);
#7828=FACE_OUTER_BOUND('',#9653,.T.);
#7829=FACE_OUTER_BOUND('',#9654,.T.);
#7830=FACE_OUTER_BOUND('',#9655,.T.);
#7831=FACE_OUTER_BOUND('',#9656,.T.);
#7832=FACE_OUTER_BOUND('',#9657,.T.);
#7833=FACE_OUTER_BOUND('',#9658,.T.);
#7834=FACE_OUTER_BOUND('',#9659,.T.);
#7835=FACE_OUTER_BOUND('',#9660,.T.);
#7836=FACE_OUTER_BOUND('',#9661,.T.);
#7837=FACE_OUTER_BOUND('',#9662,.T.);
#7838=FACE_OUTER_BOUND('',#9663,.T.);
#7839=FACE_OUTER_BOUND('',#9664,.T.);
#7840=FACE_OUTER_BOUND('',#9665,.T.);
#7841=FACE_OUTER_BOUND('',#9666,.T.);
#7842=FACE_OUTER_BOUND('',#9667,.T.);
#7843=FACE_OUTER_BOUND('',#9668,.T.);
#7844=FACE_OUTER_BOUND('',#9669,.T.);
#7845=FACE_OUTER_BOUND('',#9670,.T.);
#7846=FACE_OUTER_BOUND('',#9671,.T.);
#7847=FACE_OUTER_BOUND('',#9672,.T.);
#7848=FACE_OUTER_BOUND('',#9673,.T.);
#7849=FACE_OUTER_BOUND('',#9674,.T.);
#7850=FACE_OUTER_BOUND('',#9675,.T.);
#7851=FACE_OUTER_BOUND('',#9676,.T.);
#7852=FACE_OUTER_BOUND('',#9677,.T.);
#7853=FACE_OUTER_BOUND('',#9678,.T.);
#7854=FACE_OUTER_BOUND('',#9679,.T.);
#7855=FACE_OUTER_BOUND('',#9680,.T.);
#7856=FACE_OUTER_BOUND('',#9681,.T.);
#7857=FACE_OUTER_BOUND('',#9682,.T.);
#7858=FACE_OUTER_BOUND('',#9683,.T.);
#7859=FACE_OUTER_BOUND('',#9684,.T.);
#7860=FACE_OUTER_BOUND('',#9685,.T.);
#7861=FACE_OUTER_BOUND('',#9686,.T.);
#7862=FACE_OUTER_BOUND('',#9687,.T.);
#7863=FACE_OUTER_BOUND('',#9688,.T.);
#7864=FACE_OUTER_BOUND('',#9689,.T.);
#7865=FACE_OUTER_BOUND('',#9690,.T.);
#7866=FACE_OUTER_BOUND('',#9691,.T.);
#7867=FACE_OUTER_BOUND('',#9692,.T.);
#7868=FACE_OUTER_BOUND('',#9693,.T.);
#7869=FACE_OUTER_BOUND('',#9694,.T.);
#7870=FACE_OUTER_BOUND('',#9695,.T.);
#7871=FACE_OUTER_BOUND('',#9696,.T.);
#7872=FACE_OUTER_BOUND('',#9697,.T.);
#7873=FACE_OUTER_BOUND('',#9698,.T.);
#7874=FACE_OUTER_BOUND('',#9699,.T.);
#7875=FACE_OUTER_BOUND('',#9700,.T.);
#7876=FACE_OUTER_BOUND('',#9701,.T.);
#7877=FACE_OUTER_BOUND('',#9702,.T.);
#7878=FACE_OUTER_BOUND('',#9703,.T.);
#7879=FACE_OUTER_BOUND('',#9704,.T.);
#7880=FACE_OUTER_BOUND('',#9705,.T.);
#7881=FACE_OUTER_BOUND('',#9706,.T.);
#7882=FACE_OUTER_BOUND('',#9707,.T.);
#7883=FACE_OUTER_BOUND('',#9708,.T.);
#7884=FACE_OUTER_BOUND('',#9709,.T.);
#7885=FACE_OUTER_BOUND('',#9710,.T.);
#7886=FACE_OUTER_BOUND('',#9711,.T.);
#7887=FACE_OUTER_BOUND('',#9712,.T.);
#7888=FACE_OUTER_BOUND('',#9713,.T.);
#7889=FACE_OUTER_BOUND('',#9714,.T.);
#7890=FACE_OUTER_BOUND('',#9715,.T.);
#7891=FACE_OUTER_BOUND('',#9716,.T.);
#7892=FACE_OUTER_BOUND('',#9717,.T.);
#7893=FACE_OUTER_BOUND('',#9718,.T.);
#7894=FACE_OUTER_BOUND('',#9719,.T.);
#7895=FACE_OUTER_BOUND('',#9720,.T.);
#7896=FACE_OUTER_BOUND('',#9721,.T.);
#7897=FACE_OUTER_BOUND('',#9722,.T.);
#7898=FACE_OUTER_BOUND('',#9723,.T.);
#7899=FACE_OUTER_BOUND('',#9724,.T.);
#7900=FACE_OUTER_BOUND('',#9725,.T.);
#7901=FACE_OUTER_BOUND('',#9726,.T.);
#7902=FACE_OUTER_BOUND('',#9727,.T.);
#7903=FACE_OUTER_BOUND('',#9728,.T.);
#7904=FACE_OUTER_BOUND('',#9729,.T.);
#7905=FACE_OUTER_BOUND('',#9730,.T.);
#7906=FACE_OUTER_BOUND('',#9731,.T.);
#7907=FACE_OUTER_BOUND('',#9732,.T.);
#7908=FACE_OUTER_BOUND('',#9733,.T.);
#7909=FACE_OUTER_BOUND('',#9734,.T.);
#7910=FACE_OUTER_BOUND('',#9735,.T.);
#7911=FACE_OUTER_BOUND('',#9736,.T.);
#7912=FACE_OUTER_BOUND('',#9737,.T.);
#7913=FACE_OUTER_BOUND('',#9738,.T.);
#7914=FACE_OUTER_BOUND('',#9739,.T.);
#7915=FACE_OUTER_BOUND('',#9740,.T.);
#7916=FACE_OUTER_BOUND('',#9741,.T.);
#7917=FACE_OUTER_BOUND('',#9742,.T.);
#7918=FACE_OUTER_BOUND('',#9743,.T.);
#7919=FACE_OUTER_BOUND('',#9744,.T.);
#7920=FACE_OUTER_BOUND('',#9745,.T.);
#7921=FACE_OUTER_BOUND('',#9746,.T.);
#7922=FACE_OUTER_BOUND('',#9747,.T.);
#7923=FACE_OUTER_BOUND('',#9748,.T.);
#7924=FACE_OUTER_BOUND('',#9749,.T.);
#7925=FACE_OUTER_BOUND('',#9750,.T.);
#7926=FACE_OUTER_BOUND('',#9751,.T.);
#7927=FACE_OUTER_BOUND('',#9752,.T.);
#7928=FACE_OUTER_BOUND('',#9753,.T.);
#7929=FACE_OUTER_BOUND('',#9754,.T.);
#7930=FACE_OUTER_BOUND('',#9755,.T.);
#7931=FACE_OUTER_BOUND('',#9756,.T.);
#7932=FACE_OUTER_BOUND('',#9757,.T.);
#7933=FACE_OUTER_BOUND('',#9758,.T.);
#7934=FACE_OUTER_BOUND('',#9759,.T.);
#7935=FACE_OUTER_BOUND('',#9760,.T.);
#7936=FACE_OUTER_BOUND('',#9761,.T.);
#7937=FACE_OUTER_BOUND('',#9762,.T.);
#7938=FACE_OUTER_BOUND('',#9763,.T.);
#7939=FACE_OUTER_BOUND('',#9764,.T.);
#7940=FACE_OUTER_BOUND('',#9765,.T.);
#7941=FACE_OUTER_BOUND('',#9766,.T.);
#7942=FACE_OUTER_BOUND('',#9767,.T.);
#7943=FACE_OUTER_BOUND('',#9768,.T.);
#7944=FACE_OUTER_BOUND('',#9769,.T.);
#7945=FACE_OUTER_BOUND('',#9770,.T.);
#7946=FACE_OUTER_BOUND('',#9771,.T.);
#7947=FACE_OUTER_BOUND('',#9772,.T.);
#7948=FACE_OUTER_BOUND('',#9773,.T.);
#7949=FACE_OUTER_BOUND('',#9774,.T.);
#7950=FACE_OUTER_BOUND('',#9775,.T.);
#7951=FACE_OUTER_BOUND('',#9776,.T.);
#7952=FACE_OUTER_BOUND('',#9777,.T.);
#7953=FACE_OUTER_BOUND('',#9778,.T.);
#7954=FACE_OUTER_BOUND('',#9779,.T.);
#7955=FACE_OUTER_BOUND('',#9780,.T.);
#7956=FACE_OUTER_BOUND('',#9781,.T.);
#7957=FACE_OUTER_BOUND('',#9782,.T.);
#7958=FACE_OUTER_BOUND('',#9783,.T.);
#7959=FACE_OUTER_BOUND('',#9784,.T.);
#7960=FACE_OUTER_BOUND('',#9785,.T.);
#7961=FACE_OUTER_BOUND('',#9786,.T.);
#7962=FACE_OUTER_BOUND('',#9787,.T.);
#7963=FACE_OUTER_BOUND('',#9788,.T.);
#7964=FACE_OUTER_BOUND('',#9789,.T.);
#7965=FACE_OUTER_BOUND('',#9790,.T.);
#7966=FACE_OUTER_BOUND('',#9791,.T.);
#7967=FACE_OUTER_BOUND('',#9792,.T.);
#7968=FACE_OUTER_BOUND('',#9793,.T.);
#7969=FACE_OUTER_BOUND('',#9794,.T.);
#7970=FACE_OUTER_BOUND('',#9795,.T.);
#7971=FACE_OUTER_BOUND('',#9796,.T.);
#7972=FACE_OUTER_BOUND('',#9797,.T.);
#7973=FACE_OUTER_BOUND('',#9798,.T.);
#7974=FACE_OUTER_BOUND('',#9799,.T.);
#7975=FACE_OUTER_BOUND('',#9800,.T.);
#7976=FACE_OUTER_BOUND('',#9801,.T.);
#7977=FACE_OUTER_BOUND('',#9802,.T.);
#7978=FACE_OUTER_BOUND('',#9803,.T.);
#7979=FACE_OUTER_BOUND('',#9804,.T.);
#7980=FACE_OUTER_BOUND('',#9805,.T.);
#7981=FACE_OUTER_BOUND('',#9806,.T.);
#7982=FACE_OUTER_BOUND('',#9807,.T.);
#7983=FACE_OUTER_BOUND('',#9808,.T.);
#7984=FACE_OUTER_BOUND('',#9809,.T.);
#7985=FACE_OUTER_BOUND('',#9810,.T.);
#7986=FACE_OUTER_BOUND('',#9811,.T.);
#7987=FACE_OUTER_BOUND('',#9812,.T.);
#7988=FACE_OUTER_BOUND('',#9813,.T.);
#7989=FACE_OUTER_BOUND('',#9814,.T.);
#7990=FACE_OUTER_BOUND('',#9815,.T.);
#7991=FACE_OUTER_BOUND('',#9816,.T.);
#7992=FACE_OUTER_BOUND('',#9817,.T.);
#7993=FACE_OUTER_BOUND('',#9818,.T.);
#7994=FACE_OUTER_BOUND('',#9819,.T.);
#7995=FACE_OUTER_BOUND('',#9820,.T.);
#7996=FACE_OUTER_BOUND('',#9821,.T.);
#7997=FACE_OUTER_BOUND('',#9822,.T.);
#7998=FACE_OUTER_BOUND('',#9823,.T.);
#7999=FACE_OUTER_BOUND('',#9824,.T.);
#8000=FACE_OUTER_BOUND('',#9825,.T.);
#8001=FACE_OUTER_BOUND('',#9826,.T.);
#8002=FACE_OUTER_BOUND('',#9827,.T.);
#8003=FACE_OUTER_BOUND('',#9828,.T.);
#8004=FACE_OUTER_BOUND('',#9829,.T.);
#8005=FACE_OUTER_BOUND('',#9830,.T.);
#8006=FACE_OUTER_BOUND('',#9831,.T.);
#8007=FACE_OUTER_BOUND('',#9832,.T.);
#8008=FACE_OUTER_BOUND('',#9833,.T.);
#8009=FACE_OUTER_BOUND('',#9834,.T.);
#8010=FACE_OUTER_BOUND('',#9835,.T.);
#8011=FACE_OUTER_BOUND('',#9836,.T.);
#8012=FACE_OUTER_BOUND('',#9837,.T.);
#8013=FACE_OUTER_BOUND('',#9838,.T.);
#8014=FACE_OUTER_BOUND('',#9839,.T.);
#8015=FACE_OUTER_BOUND('',#9840,.T.);
#8016=FACE_OUTER_BOUND('',#9841,.T.);
#8017=FACE_OUTER_BOUND('',#9842,.T.);
#8018=FACE_OUTER_BOUND('',#9843,.T.);
#8019=FACE_OUTER_BOUND('',#9844,.T.);
#8020=FACE_OUTER_BOUND('',#9845,.T.);
#8021=FACE_OUTER_BOUND('',#9846,.T.);
#8022=FACE_OUTER_BOUND('',#9847,.T.);
#8023=FACE_OUTER_BOUND('',#9848,.T.);
#8024=FACE_OUTER_BOUND('',#9849,.T.);
#8025=FACE_OUTER_BOUND('',#9850,.T.);
#8026=FACE_OUTER_BOUND('',#9851,.T.);
#8027=FACE_OUTER_BOUND('',#9852,.T.);
#8028=FACE_OUTER_BOUND('',#9853,.T.);
#8029=FACE_OUTER_BOUND('',#9854,.T.);
#8030=FACE_OUTER_BOUND('',#9855,.T.);
#8031=FACE_OUTER_BOUND('',#9856,.T.);
#8032=FACE_OUTER_BOUND('',#9857,.T.);
#8033=FACE_OUTER_BOUND('',#9858,.T.);
#8034=FACE_OUTER_BOUND('',#9859,.T.);
#8035=FACE_OUTER_BOUND('',#9860,.T.);
#8036=FACE_OUTER_BOUND('',#9861,.T.);
#8037=FACE_OUTER_BOUND('',#9862,.T.);
#8038=FACE_OUTER_BOUND('',#9863,.T.);
#8039=FACE_OUTER_BOUND('',#9864,.T.);
#8040=FACE_OUTER_BOUND('',#9865,.T.);
#8041=FACE_OUTER_BOUND('',#9866,.T.);
#8042=FACE_OUTER_BOUND('',#9867,.T.);
#8043=FACE_OUTER_BOUND('',#9868,.T.);
#8044=FACE_OUTER_BOUND('',#9869,.T.);
#8045=FACE_OUTER_BOUND('',#9870,.T.);
#8046=FACE_OUTER_BOUND('',#9871,.T.);
#8047=FACE_OUTER_BOUND('',#9872,.T.);
#8048=FACE_OUTER_BOUND('',#9873,.T.);
#8049=FACE_OUTER_BOUND('',#9874,.T.);
#8050=FACE_OUTER_BOUND('',#9875,.T.);
#8051=FACE_OUTER_BOUND('',#9876,.T.);
#8052=FACE_OUTER_BOUND('',#9877,.T.);
#8053=FACE_OUTER_BOUND('',#9878,.T.);
#8054=FACE_OUTER_BOUND('',#9879,.T.);
#8055=FACE_OUTER_BOUND('',#9880,.T.);
#8056=FACE_OUTER_BOUND('',#9881,.T.);
#8057=FACE_OUTER_BOUND('',#9882,.T.);
#8058=FACE_OUTER_BOUND('',#9883,.T.);
#8059=FACE_OUTER_BOUND('',#9884,.T.);
#8060=FACE_OUTER_BOUND('',#9885,.T.);
#8061=FACE_OUTER_BOUND('',#9886,.T.);
#8062=FACE_OUTER_BOUND('',#9887,.T.);
#8063=FACE_OUTER_BOUND('',#9888,.T.);
#8064=FACE_OUTER_BOUND('',#9889,.T.);
#8065=FACE_OUTER_BOUND('',#9890,.T.);
#8066=FACE_OUTER_BOUND('',#9891,.T.);
#8067=FACE_OUTER_BOUND('',#9892,.T.);
#8068=FACE_OUTER_BOUND('',#9893,.T.);
#8069=FACE_OUTER_BOUND('',#9894,.T.);
#8070=FACE_OUTER_BOUND('',#9895,.T.);
#8071=FACE_OUTER_BOUND('',#9896,.T.);
#8072=FACE_OUTER_BOUND('',#9897,.T.);
#8073=FACE_OUTER_BOUND('',#9898,.T.);
#8074=FACE_OUTER_BOUND('',#9899,.T.);
#8075=FACE_OUTER_BOUND('',#9900,.T.);
#8076=FACE_OUTER_BOUND('',#9901,.T.);
#8077=FACE_OUTER_BOUND('',#9902,.T.);
#8078=FACE_OUTER_BOUND('',#9903,.T.);
#8079=FACE_OUTER_BOUND('',#9904,.T.);
#8080=FACE_OUTER_BOUND('',#9905,.T.);
#8081=FACE_OUTER_BOUND('',#9906,.T.);
#8082=FACE_OUTER_BOUND('',#9907,.T.);
#8083=FACE_OUTER_BOUND('',#9908,.T.);
#8084=FACE_OUTER_BOUND('',#9909,.T.);
#8085=FACE_OUTER_BOUND('',#9910,.T.);
#8086=FACE_OUTER_BOUND('',#9911,.T.);
#8087=FACE_OUTER_BOUND('',#9912,.T.);
#8088=FACE_OUTER_BOUND('',#9913,.T.);
#8089=FACE_OUTER_BOUND('',#9914,.T.);
#8090=FACE_OUTER_BOUND('',#9915,.T.);
#8091=FACE_OUTER_BOUND('',#9916,.T.);
#8092=FACE_OUTER_BOUND('',#9917,.T.);
#8093=FACE_OUTER_BOUND('',#9918,.T.);
#8094=FACE_OUTER_BOUND('',#9919,.T.);
#8095=FACE_OUTER_BOUND('',#9920,.T.);
#8096=FACE_OUTER_BOUND('',#9921,.T.);
#8097=FACE_OUTER_BOUND('',#9922,.T.);
#8098=FACE_OUTER_BOUND('',#9923,.T.);
#8099=FACE_OUTER_BOUND('',#9924,.T.);
#8100=FACE_OUTER_BOUND('',#9925,.T.);
#8101=FACE_OUTER_BOUND('',#9926,.T.);
#8102=FACE_OUTER_BOUND('',#9927,.T.);
#8103=FACE_OUTER_BOUND('',#9928,.T.);
#8104=FACE_OUTER_BOUND('',#9929,.T.);
#8105=FACE_OUTER_BOUND('',#9930,.T.);
#8106=FACE_OUTER_BOUND('',#9931,.T.);
#8107=FACE_OUTER_BOUND('',#9932,.T.);
#8108=FACE_OUTER_BOUND('',#9933,.T.);
#8109=FACE_OUTER_BOUND('',#9934,.T.);
#8110=FACE_OUTER_BOUND('',#9935,.T.);
#8111=FACE_OUTER_BOUND('',#9936,.T.);
#8112=FACE_OUTER_BOUND('',#9937,.T.);
#8113=FACE_OUTER_BOUND('',#9938,.T.);
#8114=FACE_OUTER_BOUND('',#9939,.T.);
#8115=FACE_OUTER_BOUND('',#9940,.T.);
#8116=FACE_OUTER_BOUND('',#9941,.T.);
#8117=FACE_OUTER_BOUND('',#9942,.T.);
#8118=FACE_OUTER_BOUND('',#9943,.T.);
#8119=FACE_OUTER_BOUND('',#9944,.T.);
#8120=FACE_OUTER_BOUND('',#9945,.T.);
#8121=FACE_OUTER_BOUND('',#9946,.T.);
#8122=FACE_OUTER_BOUND('',#9947,.T.);
#8123=FACE_OUTER_BOUND('',#9948,.T.);
#8124=FACE_OUTER_BOUND('',#9949,.T.);
#8125=FACE_OUTER_BOUND('',#9950,.T.);
#8126=FACE_OUTER_BOUND('',#9951,.T.);
#8127=FACE_OUTER_BOUND('',#9952,.T.);
#8128=FACE_OUTER_BOUND('',#9953,.T.);
#8129=FACE_OUTER_BOUND('',#9954,.T.);
#8130=FACE_OUTER_BOUND('',#9955,.T.);
#8131=FACE_OUTER_BOUND('',#9956,.T.);
#8132=FACE_OUTER_BOUND('',#9957,.T.);
#8133=FACE_OUTER_BOUND('',#9958,.T.);
#8134=FACE_OUTER_BOUND('',#9959,.T.);
#8135=FACE_OUTER_BOUND('',#9960,.T.);
#8136=FACE_OUTER_BOUND('',#9961,.T.);
#8137=FACE_OUTER_BOUND('',#9962,.T.);
#8138=FACE_OUTER_BOUND('',#9963,.T.);
#8139=FACE_OUTER_BOUND('',#9964,.T.);
#8140=FACE_OUTER_BOUND('',#9965,.T.);
#8141=FACE_OUTER_BOUND('',#9966,.T.);
#8142=FACE_OUTER_BOUND('',#9967,.T.);
#8143=FACE_OUTER_BOUND('',#9968,.T.);
#8144=FACE_OUTER_BOUND('',#9969,.T.);
#8145=FACE_OUTER_BOUND('',#9970,.T.);
#8146=FACE_OUTER_BOUND('',#9971,.T.);
#8147=FACE_OUTER_BOUND('',#9972,.T.);
#8148=FACE_OUTER_BOUND('',#9973,.T.);
#8149=FACE_OUTER_BOUND('',#9974,.T.);
#8150=FACE_OUTER_BOUND('',#9975,.T.);
#8151=FACE_OUTER_BOUND('',#9976,.T.);
#8152=FACE_OUTER_BOUND('',#9977,.T.);
#8153=FACE_OUTER_BOUND('',#9978,.T.);
#8154=FACE_OUTER_BOUND('',#9979,.T.);
#8155=FACE_OUTER_BOUND('',#9980,.T.);
#8156=FACE_OUTER_BOUND('',#9981,.T.);
#8157=FACE_OUTER_BOUND('',#9982,.T.);
#8158=FACE_OUTER_BOUND('',#9983,.T.);
#8159=FACE_OUTER_BOUND('',#9984,.T.);
#8160=FACE_OUTER_BOUND('',#9985,.T.);
#8161=FACE_OUTER_BOUND('',#9986,.T.);
#8162=FACE_OUTER_BOUND('',#9987,.T.);
#8163=FACE_OUTER_BOUND('',#9988,.T.);
#8164=FACE_OUTER_BOUND('',#9989,.T.);
#8165=FACE_OUTER_BOUND('',#9990,.T.);
#8166=FACE_OUTER_BOUND('',#9991,.T.);
#8167=FACE_OUTER_BOUND('',#9992,.T.);
#8168=FACE_OUTER_BOUND('',#9993,.T.);
#8169=FACE_OUTER_BOUND('',#9994,.T.);
#8170=FACE_OUTER_BOUND('',#9995,.T.);
#8171=FACE_OUTER_BOUND('',#9996,.T.);
#8172=FACE_OUTER_BOUND('',#9997,.T.);
#8173=FACE_OUTER_BOUND('',#9998,.T.);
#8174=FACE_OUTER_BOUND('',#9999,.T.);
#8175=FACE_OUTER_BOUND('',#10000,.T.);
#8176=FACE_OUTER_BOUND('',#10001,.T.);
#8177=FACE_OUTER_BOUND('',#10002,.T.);
#8178=FACE_OUTER_BOUND('',#10003,.T.);
#8179=FACE_OUTER_BOUND('',#10004,.T.);
#8180=FACE_OUTER_BOUND('',#10005,.T.);
#8181=FACE_OUTER_BOUND('',#10006,.T.);
#8182=FACE_OUTER_BOUND('',#10007,.T.);
#8183=FACE_OUTER_BOUND('',#10008,.T.);
#8184=FACE_OUTER_BOUND('',#10009,.T.);
#8185=FACE_OUTER_BOUND('',#10010,.T.);
#8186=FACE_OUTER_BOUND('',#10011,.T.);
#8187=FACE_OUTER_BOUND('',#10012,.T.);
#8188=FACE_OUTER_BOUND('',#10013,.T.);
#8189=FACE_OUTER_BOUND('',#10014,.T.);
#8190=FACE_OUTER_BOUND('',#10015,.T.);
#8191=FACE_OUTER_BOUND('',#10016,.T.);
#8192=FACE_OUTER_BOUND('',#10017,.T.);
#8193=FACE_OUTER_BOUND('',#10018,.T.);
#8194=FACE_OUTER_BOUND('',#10019,.T.);
#8195=FACE_OUTER_BOUND('',#10020,.T.);
#8196=FACE_OUTER_BOUND('',#10021,.T.);
#8197=FACE_OUTER_BOUND('',#10022,.T.);
#8198=FACE_OUTER_BOUND('',#10023,.T.);
#8199=FACE_OUTER_BOUND('',#10024,.T.);
#8200=FACE_OUTER_BOUND('',#10025,.T.);
#8201=FACE_OUTER_BOUND('',#10026,.T.);
#8202=FACE_OUTER_BOUND('',#10027,.T.);
#8203=FACE_OUTER_BOUND('',#10028,.T.);
#8204=FACE_OUTER_BOUND('',#10029,.T.);
#8205=FACE_OUTER_BOUND('',#10030,.T.);
#8206=FACE_OUTER_BOUND('',#10031,.T.);
#8207=FACE_OUTER_BOUND('',#10032,.T.);
#8208=FACE_OUTER_BOUND('',#10033,.T.);
#8209=FACE_OUTER_BOUND('',#10034,.T.);
#8210=FACE_OUTER_BOUND('',#10035,.T.);
#8211=FACE_OUTER_BOUND('',#10036,.T.);
#8212=FACE_OUTER_BOUND('',#10037,.T.);
#8213=FACE_OUTER_BOUND('',#10038,.T.);
#8214=FACE_OUTER_BOUND('',#10039,.T.);
#8215=FACE_OUTER_BOUND('',#10040,.T.);
#8216=FACE_OUTER_BOUND('',#10041,.T.);
#8217=FACE_OUTER_BOUND('',#10042,.T.);
#8218=FACE_OUTER_BOUND('',#10043,.T.);
#8219=FACE_OUTER_BOUND('',#10044,.T.);
#8220=FACE_OUTER_BOUND('',#10045,.T.);
#8221=FACE_OUTER_BOUND('',#10046,.T.);
#8222=FACE_OUTER_BOUND('',#10047,.T.);
#8223=FACE_OUTER_BOUND('',#10048,.T.);
#8224=FACE_OUTER_BOUND('',#10049,.T.);
#8225=FACE_OUTER_BOUND('',#10050,.T.);
#8226=FACE_OUTER_BOUND('',#10051,.T.);
#8227=FACE_OUTER_BOUND('',#10052,.T.);
#8228=FACE_OUTER_BOUND('',#10053,.T.);
#8229=FACE_OUTER_BOUND('',#10054,.T.);
#8230=FACE_OUTER_BOUND('',#10055,.T.);
#8231=FACE_OUTER_BOUND('',#10056,.T.);
#8232=FACE_OUTER_BOUND('',#10057,.T.);
#8233=FACE_OUTER_BOUND('',#10058,.T.);
#8234=FACE_OUTER_BOUND('',#10059,.T.);
#8235=FACE_OUTER_BOUND('',#10060,.T.);
#8236=FACE_OUTER_BOUND('',#10061,.T.);
#8237=FACE_OUTER_BOUND('',#10062,.T.);
#8238=FACE_OUTER_BOUND('',#10063,.T.);
#8239=FACE_OUTER_BOUND('',#10064,.T.);
#8240=FACE_OUTER_BOUND('',#10065,.T.);
#8241=FACE_OUTER_BOUND('',#10066,.T.);
#8242=FACE_OUTER_BOUND('',#10067,.T.);
#8243=FACE_OUTER_BOUND('',#10068,.T.);
#8244=FACE_OUTER_BOUND('',#10069,.T.);
#8245=FACE_OUTER_BOUND('',#10070,.T.);
#8246=FACE_OUTER_BOUND('',#10071,.T.);
#8247=FACE_OUTER_BOUND('',#10072,.T.);
#8248=FACE_OUTER_BOUND('',#10073,.T.);
#8249=FACE_OUTER_BOUND('',#10074,.T.);
#8250=FACE_OUTER_BOUND('',#10075,.T.);
#8251=FACE_OUTER_BOUND('',#10076,.T.);
#8252=FACE_OUTER_BOUND('',#10077,.T.);
#8253=FACE_OUTER_BOUND('',#10078,.T.);
#8254=FACE_OUTER_BOUND('',#10079,.T.);
#8255=FACE_OUTER_BOUND('',#10080,.T.);
#8256=FACE_OUTER_BOUND('',#10081,.T.);
#8257=FACE_OUTER_BOUND('',#10082,.T.);
#8258=FACE_OUTER_BOUND('',#10083,.T.);
#8259=FACE_OUTER_BOUND('',#10084,.T.);
#8260=FACE_OUTER_BOUND('',#10085,.T.);
#8261=FACE_OUTER_BOUND('',#10086,.T.);
#8262=FACE_OUTER_BOUND('',#10087,.T.);
#8263=FACE_OUTER_BOUND('',#10088,.T.);
#8264=FACE_OUTER_BOUND('',#10089,.T.);
#8265=FACE_OUTER_BOUND('',#10090,.T.);
#8266=FACE_OUTER_BOUND('',#10091,.T.);
#8267=FACE_OUTER_BOUND('',#10092,.T.);
#8268=FACE_OUTER_BOUND('',#10093,.T.);
#8269=FACE_OUTER_BOUND('',#10094,.T.);
#8270=FACE_OUTER_BOUND('',#10095,.T.);
#8271=FACE_OUTER_BOUND('',#10096,.T.);
#8272=FACE_OUTER_BOUND('',#10097,.T.);
#8273=FACE_OUTER_BOUND('',#10098,.T.);
#8274=FACE_OUTER_BOUND('',#10099,.T.);
#8275=FACE_OUTER_BOUND('',#10100,.T.);
#8276=FACE_OUTER_BOUND('',#10101,.T.);
#8277=FACE_OUTER_BOUND('',#10102,.T.);
#8278=FACE_OUTER_BOUND('',#10103,.T.);
#8279=FACE_OUTER_BOUND('',#10104,.T.);
#8280=FACE_OUTER_BOUND('',#10105,.T.);
#8281=FACE_OUTER_BOUND('',#10106,.T.);
#8282=FACE_OUTER_BOUND('',#10107,.T.);
#8283=FACE_OUTER_BOUND('',#10108,.T.);
#8284=FACE_OUTER_BOUND('',#10109,.T.);
#8285=FACE_OUTER_BOUND('',#10110,.T.);
#8286=FACE_OUTER_BOUND('',#10111,.T.);
#8287=FACE_OUTER_BOUND('',#10112,.T.);
#8288=FACE_OUTER_BOUND('',#10113,.T.);
#8289=FACE_OUTER_BOUND('',#10114,.T.);
#8290=FACE_OUTER_BOUND('',#10115,.T.);
#8291=FACE_OUTER_BOUND('',#10116,.T.);
#8292=FACE_OUTER_BOUND('',#10117,.T.);
#8293=FACE_OUTER_BOUND('',#10118,.T.);
#8294=FACE_OUTER_BOUND('',#10119,.T.);
#8295=FACE_OUTER_BOUND('',#10120,.T.);
#8296=FACE_OUTER_BOUND('',#10121,.T.);
#8297=FACE_OUTER_BOUND('',#10122,.T.);
#8298=FACE_OUTER_BOUND('',#10123,.T.);
#8299=FACE_OUTER_BOUND('',#10124,.T.);
#8300=FACE_OUTER_BOUND('',#10125,.T.);
#8301=FACE_OUTER_BOUND('',#10126,.T.);
#8302=FACE_OUTER_BOUND('',#10127,.T.);
#8303=FACE_OUTER_BOUND('',#10128,.T.);
#8304=FACE_OUTER_BOUND('',#10129,.T.);
#8305=FACE_OUTER_BOUND('',#10130,.T.);
#8306=FACE_OUTER_BOUND('',#10131,.T.);
#8307=FACE_OUTER_BOUND('',#10132,.T.);
#8308=FACE_OUTER_BOUND('',#10133,.T.);
#8309=FACE_OUTER_BOUND('',#10134,.T.);
#8310=FACE_OUTER_BOUND('',#10135,.T.);
#8311=FACE_OUTER_BOUND('',#10136,.T.);
#8312=FACE_OUTER_BOUND('',#10137,.T.);
#8313=FACE_OUTER_BOUND('',#10138,.T.);
#8314=FACE_OUTER_BOUND('',#10139,.T.);
#8315=FACE_OUTER_BOUND('',#10140,.T.);
#8316=FACE_OUTER_BOUND('',#10141,.T.);
#8317=FACE_OUTER_BOUND('',#10142,.T.);
#8318=FACE_OUTER_BOUND('',#10143,.T.);
#8319=FACE_OUTER_BOUND('',#10144,.T.);
#8320=FACE_OUTER_BOUND('',#10145,.T.);
#8321=FACE_OUTER_BOUND('',#10146,.T.);
#8322=FACE_OUTER_BOUND('',#10147,.T.);
#8323=FACE_OUTER_BOUND('',#10148,.T.);
#8324=FACE_OUTER_BOUND('',#10149,.T.);
#8325=FACE_OUTER_BOUND('',#10150,.T.);
#8326=FACE_OUTER_BOUND('',#10151,.T.);
#8327=FACE_OUTER_BOUND('',#10152,.T.);
#8328=FACE_OUTER_BOUND('',#10153,.T.);
#8329=FACE_OUTER_BOUND('',#10154,.T.);
#8330=FACE_OUTER_BOUND('',#10155,.T.);
#8331=FACE_OUTER_BOUND('',#10156,.T.);
#8332=FACE_OUTER_BOUND('',#10157,.T.);
#8333=FACE_OUTER_BOUND('',#10158,.T.);
#8334=FACE_OUTER_BOUND('',#10159,.T.);
#8335=FACE_OUTER_BOUND('',#10160,.T.);
#8336=FACE_OUTER_BOUND('',#10161,.T.);
#8337=FACE_OUTER_BOUND('',#10162,.T.);
#8338=FACE_OUTER_BOUND('',#10163,.T.);
#8339=FACE_OUTER_BOUND('',#10164,.T.);
#8340=FACE_OUTER_BOUND('',#10165,.T.);
#8341=FACE_OUTER_BOUND('',#10166,.T.);
#8342=FACE_OUTER_BOUND('',#10167,.T.);
#8343=FACE_OUTER_BOUND('',#10168,.T.);
#8344=FACE_OUTER_BOUND('',#10169,.T.);
#8345=FACE_OUTER_BOUND('',#10170,.T.);
#8346=FACE_OUTER_BOUND('',#10171,.T.);
#8347=FACE_OUTER_BOUND('',#10172,.T.);
#8348=FACE_OUTER_BOUND('',#10173,.T.);
#8349=FACE_OUTER_BOUND('',#10174,.T.);
#8350=FACE_OUTER_BOUND('',#10175,.T.);
#8351=FACE_OUTER_BOUND('',#10176,.T.);
#8352=FACE_OUTER_BOUND('',#10177,.T.);
#8353=FACE_OUTER_BOUND('',#10178,.T.);
#8354=FACE_OUTER_BOUND('',#10179,.T.);
#8355=FACE_OUTER_BOUND('',#10180,.T.);
#8356=FACE_OUTER_BOUND('',#10181,.T.);
#8357=FACE_OUTER_BOUND('',#10182,.T.);
#8358=FACE_OUTER_BOUND('',#10183,.T.);
#8359=FACE_OUTER_BOUND('',#10184,.T.);
#8360=FACE_OUTER_BOUND('',#10185,.T.);
#8361=FACE_OUTER_BOUND('',#10186,.T.);
#8362=FACE_OUTER_BOUND('',#10187,.T.);
#8363=FACE_OUTER_BOUND('',#10188,.T.);
#8364=FACE_OUTER_BOUND('',#10189,.T.);
#8365=FACE_OUTER_BOUND('',#10190,.T.);
#8366=FACE_OUTER_BOUND('',#10191,.T.);
#8367=FACE_OUTER_BOUND('',#10192,.T.);
#8368=FACE_OUTER_BOUND('',#10193,.T.);
#8369=FACE_OUTER_BOUND('',#10194,.T.);
#8370=FACE_OUTER_BOUND('',#10195,.T.);
#8371=FACE_OUTER_BOUND('',#10196,.T.);
#8372=FACE_OUTER_BOUND('',#10197,.T.);
#8373=FACE_OUTER_BOUND('',#10198,.T.);
#8374=FACE_OUTER_BOUND('',#10199,.T.);
#8375=FACE_OUTER_BOUND('',#10200,.T.);
#8376=FACE_OUTER_BOUND('',#10201,.T.);
#8377=FACE_OUTER_BOUND('',#10202,.T.);
#8378=FACE_OUTER_BOUND('',#10203,.T.);
#8379=FACE_OUTER_BOUND('',#10204,.T.);
#8380=FACE_OUTER_BOUND('',#10205,.T.);
#8381=FACE_OUTER_BOUND('',#10206,.T.);
#8382=FACE_OUTER_BOUND('',#10207,.T.);
#8383=FACE_OUTER_BOUND('',#10208,.T.);
#8384=FACE_OUTER_BOUND('',#10209,.T.);
#8385=FACE_OUTER_BOUND('',#10210,.T.);
#8386=FACE_OUTER_BOUND('',#10211,.T.);
#8387=FACE_OUTER_BOUND('',#10212,.T.);
#8388=FACE_OUTER_BOUND('',#10213,.T.);
#8389=FACE_OUTER_BOUND('',#10214,.T.);
#8390=FACE_OUTER_BOUND('',#10215,.T.);
#8391=FACE_OUTER_BOUND('',#10216,.T.);
#8392=FACE_OUTER_BOUND('',#10217,.T.);
#8393=FACE_OUTER_BOUND('',#10218,.T.);
#8394=FACE_OUTER_BOUND('',#10219,.T.);
#8395=FACE_OUTER_BOUND('',#10220,.T.);
#8396=FACE_OUTER_BOUND('',#10221,.T.);
#8397=FACE_OUTER_BOUND('',#10222,.T.);
#8398=FACE_OUTER_BOUND('',#10223,.T.);
#8399=FACE_OUTER_BOUND('',#10224,.T.);
#8400=FACE_OUTER_BOUND('',#10225,.T.);
#8401=FACE_OUTER_BOUND('',#10226,.T.);
#8402=FACE_OUTER_BOUND('',#10227,.T.);
#8403=FACE_OUTER_BOUND('',#10228,.T.);
#8404=FACE_OUTER_BOUND('',#10229,.T.);
#8405=FACE_OUTER_BOUND('',#10230,.T.);
#8406=FACE_OUTER_BOUND('',#10231,.T.);
#8407=FACE_OUTER_BOUND('',#10232,.T.);
#8408=FACE_OUTER_BOUND('',#10233,.T.);
#8409=FACE_OUTER_BOUND('',#10234,.T.);
#8410=FACE_OUTER_BOUND('',#10235,.T.);
#8411=FACE_OUTER_BOUND('',#10236,.T.);
#8412=FACE_OUTER_BOUND('',#10237,.T.);
#8413=FACE_OUTER_BOUND('',#10238,.T.);
#8414=FACE_OUTER_BOUND('',#10239,.T.);
#8415=FACE_OUTER_BOUND('',#10240,.T.);
#8416=FACE_OUTER_BOUND('',#10241,.T.);
#8417=FACE_OUTER_BOUND('',#10242,.T.);
#8418=FACE_OUTER_BOUND('',#10243,.T.);
#8419=FACE_OUTER_BOUND('',#10244,.T.);
#8420=FACE_OUTER_BOUND('',#10245,.T.);
#8421=FACE_OUTER_BOUND('',#10246,.T.);
#8422=FACE_OUTER_BOUND('',#10247,.T.);
#8423=FACE_OUTER_BOUND('',#10248,.T.);
#8424=FACE_OUTER_BOUND('',#10249,.T.);
#8425=FACE_OUTER_BOUND('',#10250,.T.);
#8426=FACE_OUTER_BOUND('',#10251,.T.);
#8427=FACE_OUTER_BOUND('',#10252,.T.);
#8428=FACE_OUTER_BOUND('',#10253,.T.);
#8429=FACE_OUTER_BOUND('',#10254,.T.);
#8430=FACE_OUTER_BOUND('',#10255,.T.);
#8431=FACE_OUTER_BOUND('',#10256,.T.);
#8432=FACE_OUTER_BOUND('',#10257,.T.);
#8433=FACE_OUTER_BOUND('',#10258,.T.);
#8434=FACE_OUTER_BOUND('',#10259,.T.);
#8435=FACE_OUTER_BOUND('',#10260,.T.);
#8436=FACE_OUTER_BOUND('',#10261,.T.);
#8437=FACE_OUTER_BOUND('',#10262,.T.);
#8438=FACE_OUTER_BOUND('',#10263,.T.);
#8439=FACE_OUTER_BOUND('',#10264,.T.);
#8440=FACE_OUTER_BOUND('',#10265,.T.);
#8441=FACE_OUTER_BOUND('',#10266,.T.);
#8442=FACE_OUTER_BOUND('',#10267,.T.);
#8443=FACE_OUTER_BOUND('',#10268,.T.);
#8444=FACE_OUTER_BOUND('',#10269,.T.);
#8445=FACE_OUTER_BOUND('',#10270,.T.);
#8446=FACE_OUTER_BOUND('',#10271,.T.);
#8447=FACE_OUTER_BOUND('',#10272,.T.);
#8448=FACE_OUTER_BOUND('',#10273,.T.);
#8449=FACE_OUTER_BOUND('',#10274,.T.);
#8450=FACE_OUTER_BOUND('',#10275,.T.);
#8451=FACE_OUTER_BOUND('',#10276,.T.);
#8452=FACE_OUTER_BOUND('',#10277,.T.);
#8453=FACE_OUTER_BOUND('',#10278,.T.);
#8454=FACE_OUTER_BOUND('',#10279,.T.);
#8455=FACE_OUTER_BOUND('',#10280,.T.);
#8456=FACE_OUTER_BOUND('',#10281,.T.);
#8457=FACE_OUTER_BOUND('',#10282,.T.);
#8458=FACE_OUTER_BOUND('',#10283,.T.);
#8459=FACE_OUTER_BOUND('',#10284,.T.);
#8460=FACE_OUTER_BOUND('',#10285,.T.);
#8461=FACE_OUTER_BOUND('',#10286,.T.);
#8462=FACE_OUTER_BOUND('',#10287,.T.);
#8463=FACE_OUTER_BOUND('',#10288,.T.);
#8464=FACE_OUTER_BOUND('',#10289,.T.);
#8465=FACE_OUTER_BOUND('',#10290,.T.);
#8466=FACE_OUTER_BOUND('',#10291,.T.);
#8467=FACE_OUTER_BOUND('',#10292,.T.);
#8468=FACE_OUTER_BOUND('',#10293,.T.);
#8469=FACE_OUTER_BOUND('',#10294,.T.);
#8470=FACE_OUTER_BOUND('',#10295,.T.);
#8471=FACE_OUTER_BOUND('',#10296,.T.);
#8472=FACE_OUTER_BOUND('',#10297,.T.);
#8473=FACE_OUTER_BOUND('',#10298,.T.);
#8474=FACE_OUTER_BOUND('',#10299,.T.);
#8475=FACE_OUTER_BOUND('',#10300,.T.);
#8476=FACE_OUTER_BOUND('',#10301,.T.);
#8477=FACE_OUTER_BOUND('',#10302,.T.);
#8478=FACE_OUTER_BOUND('',#10303,.T.);
#8479=FACE_OUTER_BOUND('',#10304,.T.);
#8480=FACE_OUTER_BOUND('',#10305,.T.);
#8481=FACE_OUTER_BOUND('',#10306,.T.);
#8482=FACE_OUTER_BOUND('',#10307,.T.);
#8483=FACE_OUTER_BOUND('',#10308,.T.);
#8484=FACE_OUTER_BOUND('',#10309,.T.);
#8485=FACE_OUTER_BOUND('',#10310,.T.);
#8486=FACE_OUTER_BOUND('',#10311,.T.);
#8487=FACE_OUTER_BOUND('',#10312,.T.);
#8488=FACE_OUTER_BOUND('',#10313,.T.);
#8489=FACE_OUTER_BOUND('',#10314,.T.);
#8490=FACE_OUTER_BOUND('',#10315,.T.);
#8491=FACE_OUTER_BOUND('',#10316,.T.);
#8492=FACE_OUTER_BOUND('',#10317,.T.);
#8493=FACE_OUTER_BOUND('',#10318,.T.);
#8494=FACE_OUTER_BOUND('',#10319,.T.);
#8495=FACE_OUTER_BOUND('',#10320,.T.);
#8496=FACE_OUTER_BOUND('',#10321,.T.);
#8497=FACE_OUTER_BOUND('',#10322,.T.);
#8498=FACE_OUTER_BOUND('',#10323,.T.);
#8499=FACE_OUTER_BOUND('',#10324,.T.);
#8500=FACE_OUTER_BOUND('',#10325,.T.);
#8501=FACE_OUTER_BOUND('',#10326,.T.);
#8502=FACE_OUTER_BOUND('',#10327,.T.);
#8503=FACE_OUTER_BOUND('',#10328,.T.);
#8504=FACE_OUTER_BOUND('',#10329,.T.);
#8505=FACE_OUTER_BOUND('',#10330,.T.);
#8506=FACE_OUTER_BOUND('',#10331,.T.);
#8507=FACE_OUTER_BOUND('',#10332,.T.);
#8508=FACE_OUTER_BOUND('',#10333,.T.);
#8509=FACE_OUTER_BOUND('',#10334,.T.);
#8510=FACE_OUTER_BOUND('',#10335,.T.);
#8511=FACE_OUTER_BOUND('',#10336,.T.);
#8512=FACE_OUTER_BOUND('',#10337,.T.);
#8513=FACE_OUTER_BOUND('',#10338,.T.);
#8514=FACE_OUTER_BOUND('',#10339,.T.);
#8515=FACE_OUTER_BOUND('',#10340,.T.);
#8516=FACE_OUTER_BOUND('',#10341,.T.);
#8517=FACE_OUTER_BOUND('',#10342,.T.);
#8518=FACE_OUTER_BOUND('',#10343,.T.);
#8519=FACE_OUTER_BOUND('',#10344,.T.);
#8520=FACE_OUTER_BOUND('',#10345,.T.);
#8521=FACE_OUTER_BOUND('',#10346,.T.);
#8522=FACE_OUTER_BOUND('',#10347,.T.);
#8523=FACE_OUTER_BOUND('',#10348,.T.);
#8524=FACE_OUTER_BOUND('',#10349,.T.);
#8525=FACE_OUTER_BOUND('',#10350,.T.);
#8526=FACE_OUTER_BOUND('',#10351,.T.);
#8527=FACE_OUTER_BOUND('',#10352,.T.);
#8528=FACE_OUTER_BOUND('',#10353,.T.);
#8529=FACE_OUTER_BOUND('',#10354,.T.);
#8530=FACE_OUTER_BOUND('',#10355,.T.);
#8531=FACE_OUTER_BOUND('',#10356,.T.);
#8532=FACE_OUTER_BOUND('',#10357,.T.);
#8533=FACE_OUTER_BOUND('',#10358,.T.);
#8534=FACE_OUTER_BOUND('',#10359,.T.);
#8535=FACE_OUTER_BOUND('',#10360,.T.);
#8536=FACE_OUTER_BOUND('',#10361,.T.);
#8537=FACE_OUTER_BOUND('',#10362,.T.);
#8538=FACE_OUTER_BOUND('',#10363,.T.);
#8539=FACE_OUTER_BOUND('',#10364,.T.);
#8540=FACE_OUTER_BOUND('',#10365,.T.);
#8541=FACE_OUTER_BOUND('',#10366,.T.);
#8542=FACE_OUTER_BOUND('',#10367,.T.);
#8543=FACE_OUTER_BOUND('',#10368,.T.);
#8544=FACE_OUTER_BOUND('',#10369,.T.);
#8545=FACE_OUTER_BOUND('',#10370,.T.);
#8546=FACE_OUTER_BOUND('',#10371,.T.);
#8547=FACE_OUTER_BOUND('',#10372,.T.);
#8548=FACE_OUTER_BOUND('',#10373,.T.);
#8549=FACE_OUTER_BOUND('',#10374,.T.);
#8550=FACE_OUTER_BOUND('',#10375,.T.);
#8551=FACE_OUTER_BOUND('',#10376,.T.);
#8552=FACE_OUTER_BOUND('',#10377,.T.);
#8553=FACE_OUTER_BOUND('',#10378,.T.);
#8554=FACE_OUTER_BOUND('',#10379,.T.);
#8555=FACE_OUTER_BOUND('',#10380,.T.);
#8556=FACE_OUTER_BOUND('',#10381,.T.);
#8557=FACE_OUTER_BOUND('',#10382,.T.);
#8558=FACE_OUTER_BOUND('',#10383,.T.);
#8559=FACE_OUTER_BOUND('',#10384,.T.);
#8560=FACE_OUTER_BOUND('',#10385,.T.);
#8561=FACE_OUTER_BOUND('',#10386,.T.);
#8562=FACE_OUTER_BOUND('',#10387,.T.);
#8563=FACE_OUTER_BOUND('',#10388,.T.);
#8564=FACE_OUTER_BOUND('',#10389,.T.);
#8565=FACE_OUTER_BOUND('',#10390,.T.);
#8566=FACE_OUTER_BOUND('',#10391,.T.);
#8567=FACE_OUTER_BOUND('',#10392,.T.);
#8568=FACE_OUTER_BOUND('',#10393,.T.);
#8569=FACE_OUTER_BOUND('',#10394,.T.);
#8570=FACE_OUTER_BOUND('',#10395,.T.);
#8571=FACE_OUTER_BOUND('',#10396,.T.);
#8572=FACE_OUTER_BOUND('',#10397,.T.);
#8573=FACE_OUTER_BOUND('',#10398,.T.);
#8574=FACE_OUTER_BOUND('',#10399,.T.);
#8575=FACE_OUTER_BOUND('',#10400,.T.);
#8576=FACE_OUTER_BOUND('',#10401,.T.);
#8577=FACE_OUTER_BOUND('',#10402,.T.);
#8578=FACE_OUTER_BOUND('',#10403,.T.);
#8579=FACE_OUTER_BOUND('',#10404,.T.);
#8580=FACE_OUTER_BOUND('',#10405,.T.);
#8581=FACE_OUTER_BOUND('',#10406,.T.);
#8582=FACE_OUTER_BOUND('',#10407,.T.);
#8583=FACE_OUTER_BOUND('',#10408,.T.);
#8584=FACE_OUTER_BOUND('',#10409,.T.);
#8585=FACE_OUTER_BOUND('',#10410,.T.);
#8586=FACE_OUTER_BOUND('',#10411,.T.);
#8587=FACE_OUTER_BOUND('',#10412,.T.);
#8588=FACE_OUTER_BOUND('',#10413,.T.);
#8589=FACE_OUTER_BOUND('',#10414,.T.);
#8590=FACE_OUTER_BOUND('',#10415,.T.);
#8591=FACE_OUTER_BOUND('',#10416,.T.);
#8592=FACE_OUTER_BOUND('',#10417,.T.);
#8593=FACE_OUTER_BOUND('',#10418,.T.);
#8594=FACE_OUTER_BOUND('',#10419,.T.);
#8595=FACE_OUTER_BOUND('',#10420,.T.);
#8596=FACE_OUTER_BOUND('',#10421,.T.);
#8597=FACE_OUTER_BOUND('',#10422,.T.);
#8598=FACE_OUTER_BOUND('',#10423,.T.);
#8599=FACE_OUTER_BOUND('',#10424,.T.);
#8600=FACE_OUTER_BOUND('',#10425,.T.);
#8601=FACE_OUTER_BOUND('',#10426,.T.);
#8602=FACE_OUTER_BOUND('',#10427,.T.);
#8603=FACE_OUTER_BOUND('',#10428,.T.);
#8604=FACE_OUTER_BOUND('',#10429,.T.);
#8605=FACE_OUTER_BOUND('',#10430,.T.);
#8606=FACE_OUTER_BOUND('',#10431,.T.);
#8607=FACE_OUTER_BOUND('',#10432,.T.);
#8608=FACE_OUTER_BOUND('',#10433,.T.);
#8609=FACE_OUTER_BOUND('',#10434,.T.);
#8610=FACE_OUTER_BOUND('',#10435,.T.);
#8611=FACE_OUTER_BOUND('',#10436,.T.);
#8612=FACE_OUTER_BOUND('',#10437,.T.);
#8613=FACE_OUTER_BOUND('',#10438,.T.);
#8614=FACE_OUTER_BOUND('',#10439,.T.);
#8615=FACE_OUTER_BOUND('',#10440,.T.);
#8616=FACE_OUTER_BOUND('',#10441,.T.);
#8617=FACE_OUTER_BOUND('',#10442,.T.);
#8618=FACE_OUTER_BOUND('',#10443,.T.);
#8619=FACE_OUTER_BOUND('',#10444,.T.);
#8620=FACE_OUTER_BOUND('',#10445,.T.);
#8621=FACE_OUTER_BOUND('',#10446,.T.);
#8622=FACE_OUTER_BOUND('',#10447,.T.);
#8623=FACE_OUTER_BOUND('',#10448,.T.);
#8624=FACE_OUTER_BOUND('',#10449,.T.);
#8625=FACE_OUTER_BOUND('',#10450,.T.);
#8626=FACE_OUTER_BOUND('',#10451,.T.);
#8627=FACE_OUTER_BOUND('',#10452,.T.);
#8628=FACE_OUTER_BOUND('',#10453,.T.);
#8629=FACE_OUTER_BOUND('',#10454,.T.);
#8630=FACE_OUTER_BOUND('',#10455,.T.);
#8631=FACE_OUTER_BOUND('',#10456,.T.);
#8632=FACE_OUTER_BOUND('',#10457,.T.);
#8633=FACE_OUTER_BOUND('',#10458,.T.);
#8634=FACE_OUTER_BOUND('',#10459,.T.);
#8635=FACE_OUTER_BOUND('',#10460,.T.);
#8636=FACE_OUTER_BOUND('',#10461,.T.);
#8637=FACE_OUTER_BOUND('',#10462,.T.);
#8638=FACE_OUTER_BOUND('',#10463,.T.);
#8639=FACE_OUTER_BOUND('',#10464,.T.);
#8640=FACE_OUTER_BOUND('',#10465,.T.);
#8641=FACE_OUTER_BOUND('',#10466,.T.);
#8642=FACE_OUTER_BOUND('',#10467,.T.);
#8643=FACE_OUTER_BOUND('',#10468,.T.);
#8644=FACE_OUTER_BOUND('',#10469,.T.);
#8645=FACE_OUTER_BOUND('',#10470,.T.);
#8646=FACE_OUTER_BOUND('',#10471,.T.);
#8647=FACE_OUTER_BOUND('',#10472,.T.);
#8648=FACE_OUTER_BOUND('',#10473,.T.);
#8649=FACE_OUTER_BOUND('',#10474,.T.);
#8650=FACE_OUTER_BOUND('',#10475,.T.);
#8651=FACE_OUTER_BOUND('',#10476,.T.);
#8652=FACE_OUTER_BOUND('',#10477,.T.);
#8653=FACE_OUTER_BOUND('',#10478,.T.);
#8654=FACE_OUTER_BOUND('',#10479,.T.);
#8655=FACE_OUTER_BOUND('',#10480,.T.);
#8656=FACE_OUTER_BOUND('',#10481,.T.);
#8657=FACE_OUTER_BOUND('',#10482,.T.);
#8658=FACE_OUTER_BOUND('',#10483,.T.);
#8659=FACE_OUTER_BOUND('',#10484,.T.);
#8660=FACE_OUTER_BOUND('',#10485,.T.);
#8661=FACE_OUTER_BOUND('',#10486,.T.);
#8662=FACE_OUTER_BOUND('',#10487,.T.);
#8663=FACE_OUTER_BOUND('',#10488,.T.);
#8664=FACE_OUTER_BOUND('',#10489,.T.);
#8665=FACE_OUTER_BOUND('',#10490,.T.);
#8666=FACE_OUTER_BOUND('',#10491,.T.);
#8667=FACE_OUTER_BOUND('',#10492,.T.);
#8668=FACE_OUTER_BOUND('',#10493,.T.);
#8669=FACE_OUTER_BOUND('',#10494,.T.);
#8670=FACE_OUTER_BOUND('',#10495,.T.);
#8671=FACE_OUTER_BOUND('',#10496,.T.);
#8672=FACE_OUTER_BOUND('',#10497,.T.);
#8673=FACE_OUTER_BOUND('',#10498,.T.);
#8674=FACE_OUTER_BOUND('',#10499,.T.);
#8675=FACE_OUTER_BOUND('',#10500,.T.);
#8676=FACE_OUTER_BOUND('',#10501,.T.);
#8677=FACE_OUTER_BOUND('',#10502,.T.);
#8678=FACE_OUTER_BOUND('',#10503,.T.);
#8679=FACE_OUTER_BOUND('',#10504,.T.);
#8680=FACE_OUTER_BOUND('',#10505,.T.);
#8681=FACE_OUTER_BOUND('',#10506,.T.);
#8682=FACE_OUTER_BOUND('',#10507,.T.);
#8683=FACE_OUTER_BOUND('',#10508,.T.);
#8684=FACE_OUTER_BOUND('',#10509,.T.);
#8685=FACE_OUTER_BOUND('',#10510,.T.);
#8686=FACE_OUTER_BOUND('',#10511,.T.);
#8687=FACE_OUTER_BOUND('',#10512,.T.);
#8688=FACE_OUTER_BOUND('',#10513,.T.);
#8689=FACE_OUTER_BOUND('',#10514,.T.);
#8690=FACE_OUTER_BOUND('',#10515,.T.);
#8691=FACE_OUTER_BOUND('',#10516,.T.);
#8692=FACE_OUTER_BOUND('',#10517,.T.);
#8693=FACE_OUTER_BOUND('',#10518,.T.);
#8694=FACE_OUTER_BOUND('',#10519,.T.);
#8695=FACE_OUTER_BOUND('',#10520,.T.);
#8696=FACE_OUTER_BOUND('',#10521,.T.);
#8697=FACE_OUTER_BOUND('',#10522,.T.);
#8698=FACE_OUTER_BOUND('',#10523,.T.);
#8699=FACE_OUTER_BOUND('',#10524,.T.);
#8700=FACE_OUTER_BOUND('',#10525,.T.);
#8701=FACE_OUTER_BOUND('',#10526,.T.);
#8702=FACE_OUTER_BOUND('',#10527,.T.);
#8703=FACE_OUTER_BOUND('',#10528,.T.);
#8704=FACE_OUTER_BOUND('',#10529,.T.);
#8705=FACE_OUTER_BOUND('',#10530,.T.);
#8706=FACE_OUTER_BOUND('',#10531,.T.);
#8707=FACE_OUTER_BOUND('',#10532,.T.);
#8708=FACE_OUTER_BOUND('',#10533,.T.);
#8709=FACE_OUTER_BOUND('',#10534,.T.);
#8710=FACE_OUTER_BOUND('',#10535,.T.);
#8711=FACE_OUTER_BOUND('',#10536,.T.);
#8712=FACE_OUTER_BOUND('',#10537,.T.);
#8713=FACE_OUTER_BOUND('',#10538,.T.);
#8714=FACE_OUTER_BOUND('',#10539,.T.);
#8715=FACE_OUTER_BOUND('',#10540,.T.);
#8716=FACE_OUTER_BOUND('',#10541,.T.);
#8717=FACE_OUTER_BOUND('',#10542,.T.);
#8718=FACE_OUTER_BOUND('',#10543,.T.);
#8719=FACE_OUTER_BOUND('',#10544,.T.);
#8720=FACE_OUTER_BOUND('',#10545,.T.);
#8721=FACE_OUTER_BOUND('',#10546,.T.);
#8722=FACE_OUTER_BOUND('',#10547,.T.);
#8723=FACE_OUTER_BOUND('',#10548,.T.);
#8724=FACE_OUTER_BOUND('',#10549,.T.);
#8725=FACE_OUTER_BOUND('',#10550,.T.);
#8726=FACE_OUTER_BOUND('',#10551,.T.);
#8727=FACE_OUTER_BOUND('',#10552,.T.);
#8728=FACE_OUTER_BOUND('',#10553,.T.);
#8729=FACE_OUTER_BOUND('',#10554,.T.);
#8730=FACE_OUTER_BOUND('',#10555,.T.);
#8731=FACE_OUTER_BOUND('',#10556,.T.);
#8732=FACE_OUTER_BOUND('',#10557,.T.);
#8733=FACE_OUTER_BOUND('',#10558,.T.);
#8734=FACE_OUTER_BOUND('',#10559,.T.);
#8735=FACE_OUTER_BOUND('',#10560,.T.);
#8736=FACE_OUTER_BOUND('',#10561,.T.);
#8737=FACE_OUTER_BOUND('',#10562,.T.);
#8738=FACE_OUTER_BOUND('',#10563,.T.);
#8739=FACE_OUTER_BOUND('',#10564,.T.);
#8740=FACE_OUTER_BOUND('',#10565,.T.);
#8741=FACE_OUTER_BOUND('',#10566,.T.);
#8742=FACE_OUTER_BOUND('',#10567,.T.);
#8743=FACE_OUTER_BOUND('',#10568,.T.);
#8744=FACE_OUTER_BOUND('',#10569,.T.);
#8745=FACE_OUTER_BOUND('',#10570,.T.);
#8746=FACE_OUTER_BOUND('',#10571,.T.);
#8747=FACE_OUTER_BOUND('',#10572,.T.);
#8748=FACE_OUTER_BOUND('',#10573,.T.);
#8749=FACE_OUTER_BOUND('',#10574,.T.);
#8750=FACE_OUTER_BOUND('',#10575,.T.);
#8751=FACE_OUTER_BOUND('',#10576,.T.);
#8752=FACE_OUTER_BOUND('',#10577,.T.);
#8753=FACE_OUTER_BOUND('',#10578,.T.);
#8754=FACE_OUTER_BOUND('',#10579,.T.);
#8755=FACE_OUTER_BOUND('',#10580,.T.);
#8756=FACE_OUTER_BOUND('',#10581,.T.);
#8757=FACE_OUTER_BOUND('',#10582,.T.);
#8758=FACE_OUTER_BOUND('',#10583,.T.);
#8759=FACE_OUTER_BOUND('',#10584,.T.);
#8760=FACE_OUTER_BOUND('',#10585,.T.);
#8761=FACE_OUTER_BOUND('',#10586,.T.);
#8762=FACE_OUTER_BOUND('',#10587,.T.);
#8763=FACE_OUTER_BOUND('',#10588,.T.);
#8764=FACE_OUTER_BOUND('',#10589,.T.);
#8765=FACE_OUTER_BOUND('',#10590,.T.);
#8766=FACE_OUTER_BOUND('',#10591,.T.);
#8767=FACE_OUTER_BOUND('',#10592,.T.);
#8768=FACE_OUTER_BOUND('',#10593,.T.);
#8769=FACE_OUTER_BOUND('',#10594,.T.);
#8770=FACE_OUTER_BOUND('',#10595,.T.);
#8771=FACE_OUTER_BOUND('',#10596,.T.);
#8772=FACE_OUTER_BOUND('',#10597,.T.);
#8773=FACE_OUTER_BOUND('',#10598,.T.);
#8774=FACE_OUTER_BOUND('',#10599,.T.);
#8775=FACE_OUTER_BOUND('',#10600,.T.);
#8776=FACE_OUTER_BOUND('',#10601,.T.);
#8777=FACE_OUTER_BOUND('',#10602,.T.);
#8778=FACE_OUTER_BOUND('',#10603,.T.);
#8779=FACE_OUTER_BOUND('',#10604,.T.);
#8780=FACE_OUTER_BOUND('',#10605,.T.);
#8781=FACE_OUTER_BOUND('',#10606,.T.);
#8782=FACE_OUTER_BOUND('',#10607,.T.);
#8783=FACE_OUTER_BOUND('',#10608,.T.);
#8784=FACE_OUTER_BOUND('',#10609,.T.);
#8785=FACE_OUTER_BOUND('',#10610,.T.);
#8786=FACE_OUTER_BOUND('',#10611,.T.);
#8787=FACE_OUTER_BOUND('',#10612,.T.);
#8788=FACE_OUTER_BOUND('',#10613,.T.);
#8789=FACE_OUTER_BOUND('',#10614,.T.);
#8790=FACE_OUTER_BOUND('',#10615,.T.);
#8791=FACE_OUTER_BOUND('',#10616,.T.);
#8792=FACE_OUTER_BOUND('',#10617,.T.);
#8793=FACE_OUTER_BOUND('',#10618,.T.);
#8794=FACE_OUTER_BOUND('',#10619,.T.);
#8795=FACE_OUTER_BOUND('',#10620,.T.);
#8796=FACE_OUTER_BOUND('',#10621,.T.);
#8797=FACE_OUTER_BOUND('',#10622,.T.);
#8798=FACE_OUTER_BOUND('',#10623,.T.);
#8799=FACE_OUTER_BOUND('',#10624,.T.);
#8800=FACE_OUTER_BOUND('',#10625,.T.);
#8801=FACE_OUTER_BOUND('',#10626,.T.);
#8802=FACE_OUTER_BOUND('',#10627,.T.);
#8803=FACE_OUTER_BOUND('',#10628,.T.);
#8804=FACE_OUTER_BOUND('',#10629,.T.);
#8805=FACE_OUTER_BOUND('',#10630,.T.);
#8806=FACE_OUTER_BOUND('',#10631,.T.);
#8807=FACE_OUTER_BOUND('',#10632,.T.);
#8808=FACE_OUTER_BOUND('',#10633,.T.);
#8809=FACE_OUTER_BOUND('',#10634,.T.);
#8810=FACE_OUTER_BOUND('',#10635,.T.);
#8811=FACE_OUTER_BOUND('',#10636,.T.);
#8812=FACE_OUTER_BOUND('',#10637,.T.);
#8813=FACE_OUTER_BOUND('',#10638,.T.);
#8814=FACE_OUTER_BOUND('',#10639,.T.);
#8815=FACE_OUTER_BOUND('',#10640,.T.);
#8816=FACE_OUTER_BOUND('',#10641,.T.);
#8817=FACE_OUTER_BOUND('',#10642,.T.);
#8818=FACE_OUTER_BOUND('',#10643,.T.);
#8819=FACE_OUTER_BOUND('',#10644,.T.);
#8820=FACE_OUTER_BOUND('',#10645,.T.);
#8821=FACE_OUTER_BOUND('',#10646,.T.);
#8822=FACE_OUTER_BOUND('',#10647,.T.);
#8823=FACE_OUTER_BOUND('',#10648,.T.);
#8824=FACE_OUTER_BOUND('',#10649,.T.);
#8825=FACE_OUTER_BOUND('',#10650,.T.);
#8826=FACE_OUTER_BOUND('',#10651,.T.);
#8827=FACE_OUTER_BOUND('',#10652,.T.);
#8828=FACE_OUTER_BOUND('',#10653,.T.);
#8829=FACE_OUTER_BOUND('',#10654,.T.);
#8830=FACE_OUTER_BOUND('',#10655,.T.);
#8831=FACE_OUTER_BOUND('',#10656,.T.);
#8832=FACE_OUTER_BOUND('',#10657,.T.);
#8833=FACE_OUTER_BOUND('',#10658,.T.);
#8834=FACE_OUTER_BOUND('',#10659,.T.);
#8835=FACE_OUTER_BOUND('',#10660,.T.);
#8836=FACE_OUTER_BOUND('',#10661,.T.);
#8837=FACE_OUTER_BOUND('',#10662,.T.);
#8838=FACE_OUTER_BOUND('',#10663,.T.);
#8839=FACE_OUTER_BOUND('',#10664,.T.);
#8840=FACE_OUTER_BOUND('',#10665,.T.);
#8841=FACE_OUTER_BOUND('',#10666,.T.);
#8842=FACE_OUTER_BOUND('',#10667,.T.);
#8843=FACE_OUTER_BOUND('',#10668,.T.);
#8844=FACE_OUTER_BOUND('',#10669,.T.);
#8845=FACE_OUTER_BOUND('',#10670,.T.);
#8846=FACE_OUTER_BOUND('',#10671,.T.);
#8847=FACE_OUTER_BOUND('',#10672,.T.);
#8848=FACE_OUTER_BOUND('',#10673,.T.);
#8849=FACE_OUTER_BOUND('',#10674,.T.);
#8850=FACE_OUTER_BOUND('',#10675,.T.);
#8851=FACE_OUTER_BOUND('',#10676,.T.);
#8852=FACE_OUTER_BOUND('',#10677,.T.);
#8853=FACE_OUTER_BOUND('',#10678,.T.);
#8854=FACE_OUTER_BOUND('',#10679,.T.);
#8855=FACE_OUTER_BOUND('',#10680,.T.);
#8856=FACE_OUTER_BOUND('',#10681,.T.);
#8857=FACE_OUTER_BOUND('',#10682,.T.);
#8858=FACE_OUTER_BOUND('',#10683,.T.);
#8859=FACE_OUTER_BOUND('',#10684,.T.);
#8860=FACE_OUTER_BOUND('',#10685,.T.);
#8861=FACE_OUTER_BOUND('',#10686,.T.);
#8862=FACE_OUTER_BOUND('',#10687,.T.);
#8863=FACE_OUTER_BOUND('',#10688,.T.);
#8864=FACE_OUTER_BOUND('',#10689,.T.);
#8865=FACE_OUTER_BOUND('',#10690,.T.);
#8866=FACE_OUTER_BOUND('',#10691,.T.);
#8867=FACE_OUTER_BOUND('',#10692,.T.);
#8868=FACE_OUTER_BOUND('',#10693,.T.);
#8869=FACE_OUTER_BOUND('',#10694,.T.);
#8870=FACE_OUTER_BOUND('',#10695,.T.);
#8871=FACE_OUTER_BOUND('',#10696,.T.);
#8872=FACE_OUTER_BOUND('',#10697,.T.);
#8873=FACE_OUTER_BOUND('',#10698,.T.);
#8874=FACE_OUTER_BOUND('',#10699,.T.);
#8875=FACE_OUTER_BOUND('',#10700,.T.);
#8876=FACE_OUTER_BOUND('',#10701,.T.);
#8877=FACE_OUTER_BOUND('',#10702,.T.);
#8878=FACE_OUTER_BOUND('',#10703,.T.);
#8879=FACE_OUTER_BOUND('',#10704,.T.);
#8880=FACE_OUTER_BOUND('',#10705,.T.);
#8881=FACE_OUTER_BOUND('',#10706,.T.);
#8882=FACE_OUTER_BOUND('',#10707,.T.);
#8883=FACE_OUTER_BOUND('',#10708,.T.);
#8884=FACE_OUTER_BOUND('',#10709,.T.);
#8885=FACE_OUTER_BOUND('',#10710,.T.);
#8886=FACE_OUTER_BOUND('',#10711,.T.);
#8887=FACE_OUTER_BOUND('',#10712,.T.);
#8888=FACE_OUTER_BOUND('',#10713,.T.);
#8889=FACE_OUTER_BOUND('',#10714,.T.);
#8890=FACE_OUTER_BOUND('',#10715,.T.);
#8891=FACE_OUTER_BOUND('',#10716,.T.);
#8892=FACE_OUTER_BOUND('',#10717,.T.);
#8893=FACE_OUTER_BOUND('',#10718,.T.);
#8894=FACE_OUTER_BOUND('',#10719,.T.);
#8895=FACE_OUTER_BOUND('',#10720,.T.);
#8896=FACE_OUTER_BOUND('',#10721,.T.);
#8897=FACE_OUTER_BOUND('',#10722,.T.);
#8898=FACE_OUTER_BOUND('',#10723,.T.);
#8899=FACE_OUTER_BOUND('',#10724,.T.);
#8900=FACE_OUTER_BOUND('',#10725,.T.);
#8901=FACE_OUTER_BOUND('',#10726,.T.);
#8902=FACE_OUTER_BOUND('',#10727,.T.);
#8903=FACE_OUTER_BOUND('',#10728,.T.);
#8904=FACE_OUTER_BOUND('',#10729,.T.);
#8905=FACE_OUTER_BOUND('',#10730,.T.);
#8906=FACE_OUTER_BOUND('',#10731,.T.);
#8907=FACE_OUTER_BOUND('',#10732,.T.);
#8908=FACE_OUTER_BOUND('',#10733,.T.);
#8909=FACE_OUTER_BOUND('',#10734,.T.);
#8910=FACE_OUTER_BOUND('',#10735,.T.);
#8911=FACE_OUTER_BOUND('',#10736,.T.);
#8912=FACE_OUTER_BOUND('',#10737,.T.);
#8913=FACE_OUTER_BOUND('',#10738,.T.);
#8914=FACE_OUTER_BOUND('',#10739,.T.);
#8915=FACE_OUTER_BOUND('',#10740,.T.);
#8916=FACE_OUTER_BOUND('',#10741,.T.);
#8917=FACE_OUTER_BOUND('',#10742,.T.);
#8918=FACE_OUTER_BOUND('',#10743,.T.);
#8919=FACE_OUTER_BOUND('',#10744,.T.);
#8920=FACE_OUTER_BOUND('',#10745,.T.);
#8921=FACE_OUTER_BOUND('',#10746,.T.);
#8922=FACE_OUTER_BOUND('',#10747,.T.);
#8923=FACE_OUTER_BOUND('',#10748,.T.);
#8924=FACE_OUTER_BOUND('',#10749,.T.);
#8925=FACE_OUTER_BOUND('',#10750,.T.);
#8926=FACE_OUTER_BOUND('',#10751,.T.);
#8927=FACE_OUTER_BOUND('',#10752,.T.);
#8928=FACE_OUTER_BOUND('',#10753,.T.);
#8929=FACE_OUTER_BOUND('',#10754,.T.);
#8930=FACE_OUTER_BOUND('',#10755,.T.);
#8931=FACE_OUTER_BOUND('',#10756,.T.);
#8932=FACE_OUTER_BOUND('',#10757,.T.);
#8933=FACE_OUTER_BOUND('',#10758,.T.);
#8934=FACE_OUTER_BOUND('',#10759,.T.);
#8935=FACE_OUTER_BOUND('',#10760,.T.);
#8936=FACE_OUTER_BOUND('',#10761,.T.);
#8937=FACE_OUTER_BOUND('',#10762,.T.);
#8938=FACE_OUTER_BOUND('',#10763,.T.);
#8939=FACE_OUTER_BOUND('',#10764,.T.);
#8940=FACE_OUTER_BOUND('',#10765,.T.);
#8941=FACE_OUTER_BOUND('',#10766,.T.);
#8942=FACE_OUTER_BOUND('',#10767,.T.);
#8943=FACE_OUTER_BOUND('',#10768,.T.);
#8944=FACE_OUTER_BOUND('',#10769,.T.);
#8945=FACE_OUTER_BOUND('',#10770,.T.);
#8946=FACE_OUTER_BOUND('',#10771,.T.);
#8947=FACE_OUTER_BOUND('',#10772,.T.);
#8948=FACE_OUTER_BOUND('',#10773,.T.);
#8949=FACE_OUTER_BOUND('',#10774,.T.);
#8950=FACE_OUTER_BOUND('',#10775,.T.);
#8951=FACE_OUTER_BOUND('',#10776,.T.);
#8952=FACE_OUTER_BOUND('',#10777,.T.);
#8953=FACE_OUTER_BOUND('',#10778,.T.);
#8954=FACE_OUTER_BOUND('',#10779,.T.);
#8955=FACE_OUTER_BOUND('',#10780,.T.);
#8956=FACE_OUTER_BOUND('',#10781,.T.);
#8957=FACE_OUTER_BOUND('',#10782,.T.);
#8958=FACE_OUTER_BOUND('',#10783,.T.);
#8959=FACE_OUTER_BOUND('',#10784,.T.);
#8960=FACE_OUTER_BOUND('',#10785,.T.);
#8961=FACE_OUTER_BOUND('',#10786,.T.);
#8962=FACE_OUTER_BOUND('',#10787,.T.);
#8963=FACE_OUTER_BOUND('',#10788,.T.);
#8964=FACE_OUTER_BOUND('',#10789,.T.);
#8965=FACE_OUTER_BOUND('',#10790,.T.);
#8966=FACE_OUTER_BOUND('',#10791,.T.);
#8967=FACE_OUTER_BOUND('',#10792,.T.);
#8968=FACE_OUTER_BOUND('',#10793,.T.);
#8969=FACE_OUTER_BOUND('',#10794,.T.);
#8970=FACE_OUTER_BOUND('',#10795,.T.);
#8971=FACE_OUTER_BOUND('',#10796,.T.);
#8972=FACE_OUTER_BOUND('',#10797,.T.);
#8973=FACE_OUTER_BOUND('',#10798,.T.);
#8974=FACE_OUTER_BOUND('',#10799,.T.);
#8975=FACE_OUTER_BOUND('',#10800,.T.);
#8976=FACE_OUTER_BOUND('',#10801,.T.);
#8977=FACE_OUTER_BOUND('',#10802,.T.);
#8978=FACE_OUTER_BOUND('',#10803,.T.);
#8979=FACE_OUTER_BOUND('',#10804,.T.);
#8980=FACE_OUTER_BOUND('',#10805,.T.);
#8981=FACE_OUTER_BOUND('',#10806,.T.);
#8982=FACE_OUTER_BOUND('',#10807,.T.);
#8983=FACE_OUTER_BOUND('',#10808,.T.);
#8984=FACE_OUTER_BOUND('',#10809,.T.);
#8985=FACE_OUTER_BOUND('',#10810,.T.);
#8986=FACE_OUTER_BOUND('',#10811,.T.);
#8987=FACE_OUTER_BOUND('',#10812,.T.);
#8988=FACE_OUTER_BOUND('',#10813,.T.);
#8989=FACE_OUTER_BOUND('',#10814,.T.);
#8990=FACE_OUTER_BOUND('',#10815,.T.);
#8991=FACE_OUTER_BOUND('',#10816,.T.);
#8992=FACE_OUTER_BOUND('',#10817,.T.);
#8993=FACE_OUTER_BOUND('',#10818,.T.);
#8994=FACE_OUTER_BOUND('',#10819,.T.);
#8995=FACE_OUTER_BOUND('',#10820,.T.);
#8996=FACE_OUTER_BOUND('',#10821,.T.);
#8997=FACE_OUTER_BOUND('',#10822,.T.);
#8998=FACE_OUTER_BOUND('',#10823,.T.);
#8999=FACE_OUTER_BOUND('',#10824,.T.);
#9000=FACE_OUTER_BOUND('',#10825,.T.);
#9001=FACE_OUTER_BOUND('',#10826,.T.);
#9002=FACE_OUTER_BOUND('',#10827,.T.);
#9003=FACE_OUTER_BOUND('',#10828,.T.);
#9004=FACE_OUTER_BOUND('',#10829,.T.);
#9005=FACE_OUTER_BOUND('',#10830,.T.);
#9006=FACE_OUTER_BOUND('',#10831,.T.);
#9007=FACE_OUTER_BOUND('',#10832,.T.);
#9008=FACE_OUTER_BOUND('',#10833,.T.);
#9009=FACE_OUTER_BOUND('',#10834,.T.);
#9010=FACE_OUTER_BOUND('',#10835,.T.);
#9011=FACE_OUTER_BOUND('',#10836,.T.);
#9012=FACE_OUTER_BOUND('',#10837,.T.);
#9013=FACE_OUTER_BOUND('',#10838,.T.);
#9014=FACE_OUTER_BOUND('',#10839,.T.);
#9015=FACE_OUTER_BOUND('',#10840,.T.);
#9016=FACE_OUTER_BOUND('',#10841,.T.);
#9017=FACE_OUTER_BOUND('',#10842,.T.);
#9018=FACE_OUTER_BOUND('',#10843,.T.);
#9019=FACE_OUTER_BOUND('',#10844,.T.);
#9020=FACE_OUTER_BOUND('',#10845,.T.);
#9021=FACE_OUTER_BOUND('',#10846,.T.);
#9022=FACE_OUTER_BOUND('',#10847,.T.);
#9023=FACE_OUTER_BOUND('',#10848,.T.);
#9024=FACE_OUTER_BOUND('',#10849,.T.);
#9025=FACE_OUTER_BOUND('',#10850,.T.);
#9026=FACE_OUTER_BOUND('',#10851,.T.);
#9027=FACE_OUTER_BOUND('',#10852,.T.);
#9028=FACE_OUTER_BOUND('',#10853,.T.);
#9029=FACE_OUTER_BOUND('',#10854,.T.);
#9030=FACE_OUTER_BOUND('',#10855,.T.);
#9031=FACE_OUTER_BOUND('',#10856,.T.);
#9032=FACE_OUTER_BOUND('',#10857,.T.);
#9033=FACE_OUTER_BOUND('',#10858,.T.);
#9034=FACE_OUTER_BOUND('',#10859,.T.);
#9035=FACE_OUTER_BOUND('',#10860,.T.);
#9036=FACE_OUTER_BOUND('',#10861,.T.);
#9037=FACE_OUTER_BOUND('',#10862,.T.);
#9038=FACE_OUTER_BOUND('',#10863,.T.);
#9039=FACE_OUTER_BOUND('',#10864,.T.);
#9040=FACE_OUTER_BOUND('',#10865,.T.);
#9041=FACE_OUTER_BOUND('',#10866,.T.);
#9042=FACE_OUTER_BOUND('',#10867,.T.);
#9043=FACE_OUTER_BOUND('',#10868,.T.);
#9044=FACE_OUTER_BOUND('',#10869,.T.);
#9045=FACE_OUTER_BOUND('',#10870,.T.);
#9046=FACE_OUTER_BOUND('',#10871,.T.);
#9047=FACE_OUTER_BOUND('',#10872,.T.);
#9048=FACE_OUTER_BOUND('',#10873,.T.);
#9049=FACE_OUTER_BOUND('',#10874,.T.);
#9050=FACE_OUTER_BOUND('',#10875,.T.);
#9051=FACE_OUTER_BOUND('',#10876,.T.);
#9052=FACE_OUTER_BOUND('',#10877,.T.);
#9053=FACE_OUTER_BOUND('',#10878,.T.);
#9054=FACE_OUTER_BOUND('',#10879,.T.);
#9055=FACE_OUTER_BOUND('',#10880,.T.);
#9056=FACE_OUTER_BOUND('',#10881,.T.);
#9057=FACE_OUTER_BOUND('',#10882,.T.);
#9058=FACE_OUTER_BOUND('',#10883,.T.);
#9059=FACE_OUTER_BOUND('',#10884,.T.);
#9060=EDGE_LOOP('',(#19503,#19504,#19505,#19506));
#9061=EDGE_LOOP('',(#19507,#19508,#19509,#19510));
#9062=EDGE_LOOP('',(#19511,#19512,#19513,#19514));
#9063=EDGE_LOOP('',(#19515,#19516,#19517,#19518));
#9064=EDGE_LOOP('',(#19519,#19520,#19521,#19522));
#9065=EDGE_LOOP('',(#19523,#19524,#19525,#19526));
#9066=EDGE_LOOP('',(#19527,#19528,#19529,#19530));
#9067=EDGE_LOOP('',(#19531));
#9068=EDGE_LOOP('',(#19532,#19533,#19534,#19535,#19536,#19537,#19538,#19539,
#19540,#19541));
#9069=EDGE_LOOP('',(#19542,#19543,#19544,#19545,#19546,#19547,#19548,#19549,
#19550,#19551));
#9070=EDGE_LOOP('',(#19552,#19553,#19554,#19555,#19556,#19557,#19558,#19559));
#9071=EDGE_LOOP('',(#19560,#19561,#19562,#19563,#19564,#19565,#19566,#19567));
#9072=EDGE_LOOP('',(#19568,#19569,#19570,#19571,#19572,#19573,#19574,#19575));
#9073=EDGE_LOOP('',(#19576,#19577,#19578,#19579,#19580,#19581,#19582,#19583));
#9074=EDGE_LOOP('',(#19584,#19585,#19586,#19587,#19588,#19589,#19590,#19591));
#9075=EDGE_LOOP('',(#19592,#19593,#19594,#19595,#19596,#19597,#19598,#19599));
#9076=EDGE_LOOP('',(#19600,#19601,#19602,#19603,#19604,#19605,#19606,#19607));
#9077=EDGE_LOOP('',(#19608,#19609,#19610,#19611,#19612,#19613,#19614,#19615));
#9078=EDGE_LOOP('',(#19616,#19617,#19618,#19619,#19620,#19621,#19622,#19623));
#9079=EDGE_LOOP('',(#19624,#19625,#19626,#19627,#19628,#19629,#19630,#19631));
#9080=EDGE_LOOP('',(#19632,#19633,#19634,#19635,#19636,#19637,#19638,#19639));
#9081=EDGE_LOOP('',(#19640,#19641,#19642,#19643,#19644,#19645,#19646,#19647));
#9082=EDGE_LOOP('',(#19648,#19649,#19650,#19651,#19652,#19653,#19654,#19655));
#9083=EDGE_LOOP('',(#19656,#19657,#19658,#19659,#19660,#19661,#19662,#19663));
#9084=EDGE_LOOP('',(#19664,#19665,#19666,#19667,#19668,#19669,#19670,#19671));
#9085=EDGE_LOOP('',(#19672,#19673,#19674,#19675,#19676,#19677,#19678,#19679));
#9086=EDGE_LOOP('',(#19680,#19681,#19682,#19683,#19684,#19685,#19686,#19687));
#9087=EDGE_LOOP('',(#19688,#19689,#19690,#19691,#19692,#19693,#19694,#19695));
#9088=EDGE_LOOP('',(#19696,#19697,#19698,#19699,#19700,#19701,#19702,#19703));
#9089=EDGE_LOOP('',(#19704,#19705,#19706,#19707,#19708,#19709,#19710,#19711));
#9090=EDGE_LOOP('',(#19712,#19713,#19714,#19715,#19716,#19717,#19718,#19719));
#9091=EDGE_LOOP('',(#19720,#19721,#19722,#19723,#19724,#19725,#19726,#19727));
#9092=EDGE_LOOP('',(#19728,#19729,#19730,#19731,#19732,#19733,#19734,#19735));
#9093=EDGE_LOOP('',(#19736,#19737,#19738,#19739,#19740,#19741,#19742,#19743));
#9094=EDGE_LOOP('',(#19744,#19745,#19746,#19747,#19748,#19749,#19750,#19751));
#9095=EDGE_LOOP('',(#19752,#19753,#19754,#19755,#19756,#19757,#19758,#19759));
#9096=EDGE_LOOP('',(#19760,#19761,#19762,#19763,#19764,#19765,#19766,#19767));
#9097=EDGE_LOOP('',(#19768,#19769,#19770,#19771,#19772,#19773,#19774,#19775));
#9098=EDGE_LOOP('',(#19776,#19777,#19778,#19779,#19780,#19781,#19782,#19783));
#9099=EDGE_LOOP('',(#19784,#19785,#19786,#19787,#19788,#19789,#19790,#19791));
#9100=EDGE_LOOP('',(#19792,#19793,#19794,#19795,#19796,#19797,#19798,#19799));
#9101=EDGE_LOOP('',(#19800,#19801,#19802,#19803,#19804,#19805,#19806,#19807));
#9102=EDGE_LOOP('',(#19808,#19809,#19810,#19811,#19812,#19813,#19814,#19815));
#9103=EDGE_LOOP('',(#19816,#19817,#19818,#19819,#19820,#19821,#19822,#19823));
#9104=EDGE_LOOP('',(#19824,#19825,#19826,#19827,#19828,#19829,#19830,#19831));
#9105=EDGE_LOOP('',(#19832,#19833,#19834,#19835,#19836,#19837,#19838,#19839));
#9106=EDGE_LOOP('',(#19840,#19841,#19842,#19843,#19844,#19845,#19846,#19847));
#9107=EDGE_LOOP('',(#19848,#19849,#19850,#19851,#19852,#19853,#19854,#19855));
#9108=EDGE_LOOP('',(#19856,#19857,#19858,#19859,#19860,#19861,#19862,#19863));
#9109=EDGE_LOOP('',(#19864,#19865,#19866,#19867,#19868,#19869,#19870,#19871));
#9110=EDGE_LOOP('',(#19872,#19873,#19874,#19875,#19876,#19877,#19878,#19879));
#9111=EDGE_LOOP('',(#19880,#19881,#19882,#19883,#19884,#19885,#19886,#19887));
#9112=EDGE_LOOP('',(#19888,#19889,#19890,#19891,#19892,#19893,#19894,#19895));
#9113=EDGE_LOOP('',(#19896,#19897,#19898,#19899,#19900,#19901,#19902,#19903));
#9114=EDGE_LOOP('',(#19904,#19905,#19906,#19907,#19908,#19909,#19910,#19911));
#9115=EDGE_LOOP('',(#19912,#19913,#19914,#19915,#19916,#19917,#19918,#19919));
#9116=EDGE_LOOP('',(#19920,#19921,#19922,#19923,#19924,#19925,#19926,#19927));
#9117=EDGE_LOOP('',(#19928,#19929,#19930,#19931,#19932,#19933,#19934,#19935));
#9118=EDGE_LOOP('',(#19936,#19937,#19938,#19939,#19940,#19941,#19942,#19943,
#19944,#19945));
#9119=EDGE_LOOP('',(#19946,#19947,#19948,#19949,#19950,#19951,#19952,#19953));
#9120=EDGE_LOOP('',(#19954,#19955,#19956,#19957,#19958,#19959,#19960,#19961));
#9121=EDGE_LOOP('',(#19962,#19963,#19964,#19965,#19966,#19967,#19968,#19969));
#9122=EDGE_LOOP('',(#19970,#19971,#19972,#19973,#19974,#19975,#19976,#19977));
#9123=EDGE_LOOP('',(#19978,#19979,#19980,#19981,#19982,#19983,#19984,#19985));
#9124=EDGE_LOOP('',(#19986,#19987,#19988,#19989,#19990,#19991,#19992,#19993));
#9125=EDGE_LOOP('',(#19994,#19995,#19996,#19997,#19998,#19999,#20000,#20001));
#9126=EDGE_LOOP('',(#20002,#20003,#20004,#20005,#20006,#20007,#20008,#20009));
#9127=EDGE_LOOP('',(#20010,#20011,#20012,#20013,#20014,#20015,#20016,#20017));
#9128=EDGE_LOOP('',(#20018,#20019,#20020,#20021,#20022,#20023,#20024,#20025));
#9129=EDGE_LOOP('',(#20026,#20027,#20028,#20029,#20030,#20031,#20032,#20033));
#9130=EDGE_LOOP('',(#20034,#20035,#20036,#20037,#20038,#20039,#20040,#20041));
#9131=EDGE_LOOP('',(#20042,#20043,#20044,#20045,#20046,#20047,#20048,#20049));
#9132=EDGE_LOOP('',(#20050,#20051,#20052,#20053,#20054,#20055,#20056,#20057));
#9133=EDGE_LOOP('',(#20058,#20059,#20060,#20061,#20062,#20063,#20064,#20065));
#9134=EDGE_LOOP('',(#20066,#20067,#20068,#20069,#20070,#20071,#20072,#20073));
#9135=EDGE_LOOP('',(#20074,#20075,#20076,#20077,#20078,#20079,#20080,#20081));
#9136=EDGE_LOOP('',(#20082,#20083,#20084,#20085,#20086,#20087,#20088,#20089));
#9137=EDGE_LOOP('',(#20090,#20091,#20092,#20093,#20094,#20095,#20096,#20097));
#9138=EDGE_LOOP('',(#20098,#20099,#20100,#20101,#20102,#20103,#20104,#20105));
#9139=EDGE_LOOP('',(#20106,#20107,#20108,#20109,#20110,#20111,#20112,#20113));
#9140=EDGE_LOOP('',(#20114,#20115,#20116,#20117,#20118,#20119,#20120,#20121));
#9141=EDGE_LOOP('',(#20122,#20123,#20124,#20125,#20126,#20127,#20128,#20129));
#9142=EDGE_LOOP('',(#20130,#20131,#20132,#20133,#20134,#20135,#20136,#20137));
#9143=EDGE_LOOP('',(#20138,#20139,#20140,#20141,#20142,#20143,#20144,#20145));
#9144=EDGE_LOOP('',(#20146,#20147,#20148,#20149,#20150,#20151,#20152,#20153));
#9145=EDGE_LOOP('',(#20154,#20155,#20156,#20157,#20158,#20159,#20160,#20161));
#9146=EDGE_LOOP('',(#20162,#20163,#20164,#20165,#20166,#20167,#20168,#20169));
#9147=EDGE_LOOP('',(#20170,#20171,#20172,#20173,#20174,#20175,#20176,#20177));
#9148=EDGE_LOOP('',(#20178,#20179,#20180,#20181,#20182,#20183,#20184,#20185));
#9149=EDGE_LOOP('',(#20186,#20187,#20188,#20189,#20190,#20191,#20192,#20193));
#9150=EDGE_LOOP('',(#20194,#20195,#20196,#20197,#20198,#20199,#20200,#20201));
#9151=EDGE_LOOP('',(#20202,#20203,#20204,#20205,#20206,#20207,#20208,#20209));
#9152=EDGE_LOOP('',(#20210,#20211,#20212,#20213,#20214,#20215,#20216,#20217));
#9153=EDGE_LOOP('',(#20218,#20219,#20220,#20221,#20222,#20223,#20224,#20225));
#9154=EDGE_LOOP('',(#20226,#20227,#20228,#20229,#20230,#20231,#20232,#20233));
#9155=EDGE_LOOP('',(#20234,#20235,#20236,#20237,#20238,#20239,#20240,#20241));
#9156=EDGE_LOOP('',(#20242,#20243,#20244,#20245,#20246,#20247,#20248,#20249));
#9157=EDGE_LOOP('',(#20250,#20251,#20252,#20253,#20254,#20255,#20256,#20257));
#9158=EDGE_LOOP('',(#20258,#20259,#20260,#20261,#20262,#20263,#20264,#20265));
#9159=EDGE_LOOP('',(#20266,#20267,#20268,#20269,#20270,#20271,#20272,#20273));
#9160=EDGE_LOOP('',(#20274,#20275,#20276,#20277,#20278,#20279,#20280,#20281));
#9161=EDGE_LOOP('',(#20282,#20283,#20284,#20285,#20286,#20287,#20288,#20289));
#9162=EDGE_LOOP('',(#20290,#20291,#20292,#20293,#20294,#20295,#20296,#20297,
#20298,#20299));
#9163=EDGE_LOOP('',(#20300,#20301,#20302,#20303,#20304,#20305,#20306,#20307));
#9164=EDGE_LOOP('',(#20308,#20309,#20310,#20311,#20312,#20313,#20314,#20315));
#9165=EDGE_LOOP('',(#20316,#20317,#20318,#20319,#20320,#20321,#20322,#20323));
#9166=EDGE_LOOP('',(#20324,#20325,#20326,#20327,#20328,#20329,#20330,#20331));
#9167=EDGE_LOOP('',(#20332,#20333,#20334,#20335,#20336,#20337,#20338,#20339));
#9168=EDGE_LOOP('',(#20340,#20341,#20342,#20343,#20344,#20345,#20346,#20347));
#9169=EDGE_LOOP('',(#20348,#20349,#20350,#20351,#20352,#20353,#20354,#20355));
#9170=EDGE_LOOP('',(#20356,#20357,#20358,#20359,#20360,#20361,#20362,#20363));
#9171=EDGE_LOOP('',(#20364,#20365,#20366,#20367,#20368,#20369,#20370,#20371));
#9172=EDGE_LOOP('',(#20372,#20373,#20374,#20375,#20376,#20377,#20378,#20379));
#9173=EDGE_LOOP('',(#20380,#20381,#20382,#20383,#20384,#20385,#20386,#20387));
#9174=EDGE_LOOP('',(#20388,#20389,#20390,#20391,#20392,#20393,#20394,#20395));
#9175=EDGE_LOOP('',(#20396,#20397,#20398,#20399,#20400,#20401,#20402,#20403));
#9176=EDGE_LOOP('',(#20404,#20405,#20406,#20407,#20408,#20409,#20410,#20411));
#9177=EDGE_LOOP('',(#20412,#20413,#20414,#20415,#20416,#20417,#20418,#20419));
#9178=EDGE_LOOP('',(#20420,#20421,#20422,#20423,#20424,#20425,#20426,#20427));
#9179=EDGE_LOOP('',(#20428,#20429,#20430,#20431,#20432,#20433,#20434,#20435));
#9180=EDGE_LOOP('',(#20436,#20437,#20438,#20439,#20440,#20441,#20442,#20443));
#9181=EDGE_LOOP('',(#20444,#20445,#20446,#20447,#20448,#20449,#20450,#20451));
#9182=EDGE_LOOP('',(#20452,#20453,#20454,#20455,#20456,#20457,#20458,#20459));
#9183=EDGE_LOOP('',(#20460,#20461,#20462,#20463,#20464,#20465,#20466,#20467));
#9184=EDGE_LOOP('',(#20468,#20469,#20470,#20471,#20472,#20473,#20474,#20475));
#9185=EDGE_LOOP('',(#20476,#20477,#20478,#20479,#20480,#20481,#20482,#20483));
#9186=EDGE_LOOP('',(#20484,#20485,#20486,#20487,#20488,#20489,#20490,#20491));
#9187=EDGE_LOOP('',(#20492,#20493,#20494,#20495,#20496,#20497,#20498,#20499));
#9188=EDGE_LOOP('',(#20500,#20501,#20502,#20503,#20504,#20505,#20506,#20507));
#9189=EDGE_LOOP('',(#20508,#20509,#20510,#20511,#20512,#20513,#20514,#20515));
#9190=EDGE_LOOP('',(#20516,#20517,#20518,#20519,#20520,#20521,#20522,#20523));
#9191=EDGE_LOOP('',(#20524,#20525,#20526,#20527,#20528,#20529,#20530,#20531));
#9192=EDGE_LOOP('',(#20532,#20533,#20534,#20535,#20536,#20537,#20538,#20539));
#9193=EDGE_LOOP('',(#20540,#20541,#20542,#20543,#20544,#20545,#20546,#20547));
#9194=EDGE_LOOP('',(#20548,#20549,#20550,#20551,#20552,#20553,#20554,#20555));
#9195=EDGE_LOOP('',(#20556,#20557,#20558,#20559,#20560,#20561,#20562,#20563));
#9196=EDGE_LOOP('',(#20564,#20565,#20566,#20567,#20568,#20569,#20570,#20571));
#9197=EDGE_LOOP('',(#20572,#20573,#20574,#20575,#20576,#20577,#20578,#20579));
#9198=EDGE_LOOP('',(#20580,#20581,#20582,#20583,#20584,#20585,#20586,#20587));
#9199=EDGE_LOOP('',(#20588,#20589,#20590,#20591,#20592,#20593,#20594,#20595));
#9200=EDGE_LOOP('',(#20596,#20597,#20598,#20599,#20600,#20601,#20602,#20603));
#9201=EDGE_LOOP('',(#20604,#20605,#20606,#20607,#20608,#20609,#20610,#20611));
#9202=EDGE_LOOP('',(#20612,#20613,#20614,#20615,#20616,#20617,#20618,#20619));
#9203=EDGE_LOOP('',(#20620,#20621,#20622,#20623,#20624,#20625,#20626,#20627));
#9204=EDGE_LOOP('',(#20628,#20629,#20630,#20631,#20632,#20633,#20634,#20635));
#9205=EDGE_LOOP('',(#20636,#20637,#20638,#20639,#20640,#20641,#20642,#20643));
#9206=EDGE_LOOP('',(#20644,#20645,#20646,#20647,#20648,#20649,#20650,#20651));
#9207=EDGE_LOOP('',(#20652,#20653,#20654,#20655,#20656,#20657,#20658,#20659));
#9208=EDGE_LOOP('',(#20660,#20661,#20662,#20663,#20664,#20665,#20666,#20667));
#9209=EDGE_LOOP('',(#20668,#20669,#20670,#20671,#20672,#20673,#20674,#20675));
#9210=EDGE_LOOP('',(#20676,#20677,#20678,#20679,#20680,#20681,#20682,#20683));
#9211=EDGE_LOOP('',(#20684,#20685,#20686,#20687,#20688,#20689,#20690,#20691));
#9212=EDGE_LOOP('',(#20692,#20693,#20694,#20695,#20696,#20697,#20698,#20699));
#9213=EDGE_LOOP('',(#20700,#20701,#20702,#20703,#20704,#20705,#20706,#20707));
#9214=EDGE_LOOP('',(#20708,#20709,#20710,#20711,#20712,#20713,#20714,#20715));
#9215=EDGE_LOOP('',(#20716,#20717,#20718,#20719,#20720,#20721,#20722,#20723));
#9216=EDGE_LOOP('',(#20724,#20725,#20726,#20727,#20728,#20729,#20730,#20731));
#9217=EDGE_LOOP('',(#20732,#20733,#20734,#20735,#20736,#20737,#20738,#20739));
#9218=EDGE_LOOP('',(#20740,#20741,#20742,#20743,#20744,#20745,#20746,#20747));
#9219=EDGE_LOOP('',(#20748,#20749,#20750,#20751,#20752,#20753,#20754,#20755));
#9220=EDGE_LOOP('',(#20756,#20757,#20758,#20759,#20760,#20761,#20762,#20763));
#9221=EDGE_LOOP('',(#20764,#20765,#20766,#20767,#20768,#20769,#20770,#20771));
#9222=EDGE_LOOP('',(#20772,#20773,#20774,#20775,#20776,#20777,#20778,#20779));
#9223=EDGE_LOOP('',(#20780,#20781,#20782,#20783,#20784,#20785,#20786,#20787));
#9224=EDGE_LOOP('',(#20788,#20789,#20790,#20791,#20792,#20793,#20794,#20795));
#9225=EDGE_LOOP('',(#20796,#20797,#20798,#20799,#20800,#20801,#20802,#20803));
#9226=EDGE_LOOP('',(#20804,#20805,#20806,#20807,#20808,#20809,#20810,#20811));
#9227=EDGE_LOOP('',(#20812,#20813,#20814,#20815,#20816,#20817,#20818,#20819));
#9228=EDGE_LOOP('',(#20820,#20821,#20822,#20823,#20824,#20825,#20826,#20827));
#9229=EDGE_LOOP('',(#20828,#20829,#20830,#20831,#20832,#20833,#20834,#20835));
#9230=EDGE_LOOP('',(#20836,#20837,#20838,#20839,#20840,#20841,#20842,#20843));
#9231=EDGE_LOOP('',(#20844,#20845,#20846,#20847,#20848,#20849,#20850,#20851));
#9232=EDGE_LOOP('',(#20852,#20853,#20854,#20855,#20856,#20857,#20858,#20859));
#9233=EDGE_LOOP('',(#20860,#20861,#20862,#20863,#20864,#20865,#20866,#20867));
#9234=EDGE_LOOP('',(#20868,#20869,#20870,#20871,#20872,#20873,#20874,#20875));
#9235=EDGE_LOOP('',(#20876,#20877,#20878,#20879,#20880,#20881,#20882,#20883));
#9236=EDGE_LOOP('',(#20884,#20885,#20886,#20887,#20888,#20889,#20890,#20891));
#9237=EDGE_LOOP('',(#20892,#20893,#20894,#20895,#20896,#20897,#20898,#20899));
#9238=EDGE_LOOP('',(#20900,#20901,#20902,#20903,#20904,#20905,#20906,#20907));
#9239=EDGE_LOOP('',(#20908,#20909,#20910,#20911,#20912,#20913,#20914,#20915));
#9240=EDGE_LOOP('',(#20916,#20917,#20918,#20919,#20920,#20921,#20922,#20923));
#9241=EDGE_LOOP('',(#20924,#20925,#20926,#20927,#20928,#20929,#20930,#20931));
#9242=EDGE_LOOP('',(#20932,#20933,#20934,#20935,#20936,#20937,#20938,#20939));
#9243=EDGE_LOOP('',(#20940,#20941,#20942,#20943,#20944,#20945,#20946,#20947));
#9244=EDGE_LOOP('',(#20948,#20949,#20950,#20951,#20952,#20953,#20954,#20955));
#9245=EDGE_LOOP('',(#20956));
#9246=EDGE_LOOP('',(#20957,#20958,#20959,#20960,#20961,#20962,#20963,#20964));
#9247=EDGE_LOOP('',(#20965,#20966,#20967,#20968,#20969,#20970,#20971,#20972));
#9248=EDGE_LOOP('',(#20973,#20974,#20975));
#9249=EDGE_LOOP('',(#20976,#20977,#20978,#20979,#20980,#20981,#20982,#20983));
#9250=EDGE_LOOP('',(#20984,#20985,#20986,#20987,#20988,#20989,#20990,#20991));
#9251=EDGE_LOOP('',(#20992,#20993,#20994,#20995,#20996,#20997,#20998,#20999));
#9252=EDGE_LOOP('',(#21000,#21001,#21002,#21003,#21004,#21005,#21006,#21007));
#9253=EDGE_LOOP('',(#21008,#21009,#21010,#21011,#21012,#21013,#21014,#21015));
#9254=EDGE_LOOP('',(#21016,#21017,#21018,#21019,#21020,#21021,#21022,#21023));
#9255=EDGE_LOOP('',(#21024,#21025,#21026,#21027,#21028,#21029,#21030,#21031));
#9256=EDGE_LOOP('',(#21032,#21033,#21034,#21035,#21036,#21037,#21038,#21039));
#9257=EDGE_LOOP('',(#21040,#21041,#21042,#21043,#21044,#21045,#21046,#21047));
#9258=EDGE_LOOP('',(#21048,#21049,#21050,#21051,#21052,#21053,#21054,#21055));
#9259=EDGE_LOOP('',(#21056,#21057,#21058,#21059,#21060,#21061,#21062,#21063));
#9260=EDGE_LOOP('',(#21064,#21065,#21066,#21067,#21068,#21069,#21070,#21071));
#9261=EDGE_LOOP('',(#21072,#21073,#21074,#21075,#21076,#21077,#21078,#21079));
#9262=EDGE_LOOP('',(#21080,#21081,#21082,#21083,#21084,#21085,#21086,#21087));
#9263=EDGE_LOOP('',(#21088,#21089,#21090,#21091,#21092,#21093,#21094,#21095));
#9264=EDGE_LOOP('',(#21096,#21097,#21098,#21099,#21100,#21101,#21102,#21103));
#9265=EDGE_LOOP('',(#21104,#21105,#21106));
#9266=EDGE_LOOP('',(#21107,#21108,#21109,#21110,#21111,#21112,#21113,#21114));
#9267=EDGE_LOOP('',(#21115,#21116,#21117,#21118,#21119,#21120,#21121,#21122));
#9268=EDGE_LOOP('',(#21123,#21124,#21125,#21126,#21127,#21128,#21129,#21130));
#9269=EDGE_LOOP('',(#21131,#21132,#21133,#21134,#21135,#21136,#21137,#21138));
#9270=EDGE_LOOP('',(#21139,#21140,#21141,#21142,#21143,#21144,#21145,#21146));
#9271=EDGE_LOOP('',(#21147,#21148,#21149,#21150,#21151,#21152,#21153,#21154));
#9272=EDGE_LOOP('',(#21155,#21156,#21157,#21158,#21159,#21160,#21161,#21162));
#9273=EDGE_LOOP('',(#21163,#21164,#21165,#21166,#21167,#21168,#21169,#21170));
#9274=EDGE_LOOP('',(#21171,#21172,#21173,#21174,#21175,#21176,#21177,#21178));
#9275=EDGE_LOOP('',(#21179,#21180,#21181,#21182,#21183,#21184,#21185,#21186));
#9276=EDGE_LOOP('',(#21187,#21188,#21189,#21190,#21191,#21192,#21193,#21194));
#9277=EDGE_LOOP('',(#21195,#21196,#21197,#21198,#21199,#21200,#21201,#21202));
#9278=EDGE_LOOP('',(#21203,#21204,#21205,#21206,#21207,#21208,#21209,#21210));
#9279=EDGE_LOOP('',(#21211,#21212,#21213,#21214,#21215,#21216,#21217,#21218));
#9280=EDGE_LOOP('',(#21219,#21220,#21221,#21222,#21223,#21224,#21225,#21226));
#9281=EDGE_LOOP('',(#21227,#21228,#21229,#21230,#21231,#21232,#21233,#21234));
#9282=EDGE_LOOP('',(#21235,#21236,#21237,#21238,#21239,#21240,#21241,#21242));
#9283=EDGE_LOOP('',(#21243,#21244,#21245,#21246,#21247,#21248,#21249,#21250));
#9284=EDGE_LOOP('',(#21251,#21252,#21253,#21254,#21255,#21256,#21257,#21258));
#9285=EDGE_LOOP('',(#21259,#21260,#21261,#21262,#21263,#21264,#21265,#21266));
#9286=EDGE_LOOP('',(#21267,#21268,#21269,#21270,#21271,#21272,#21273,#21274));
#9287=EDGE_LOOP('',(#21275,#21276,#21277,#21278,#21279,#21280,#21281,#21282));
#9288=EDGE_LOOP('',(#21283,#21284,#21285,#21286,#21287,#21288,#21289,#21290));
#9289=EDGE_LOOP('',(#21291,#21292,#21293,#21294,#21295,#21296,#21297,#21298));
#9290=EDGE_LOOP('',(#21299,#21300,#21301,#21302,#21303,#21304,#21305,#21306));
#9291=EDGE_LOOP('',(#21307,#21308,#21309,#21310,#21311,#21312,#21313,#21314,
#21315,#21316));
#9292=EDGE_LOOP('',(#21317,#21318,#21319,#21320,#21321,#21322,#21323,#21324));
#9293=EDGE_LOOP('',(#21325,#21326,#21327,#21328,#21329,#21330,#21331,#21332));
#9294=EDGE_LOOP('',(#21333,#21334,#21335));
#9295=EDGE_LOOP('',(#21336,#21337,#21338,#21339,#21340,#21341,#21342,#21343));
#9296=EDGE_LOOP('',(#21344,#21345,#21346,#21347,#21348,#21349,#21350,#21351));
#9297=EDGE_LOOP('',(#21352,#21353,#21354,#21355,#21356,#21357,#21358,#21359));
#9298=EDGE_LOOP('',(#21360,#21361,#21362,#21363,#21364,#21365,#21366,#21367));
#9299=EDGE_LOOP('',(#21368,#21369,#21370,#21371,#21372,#21373,#21374,#21375));
#9300=EDGE_LOOP('',(#21376,#21377,#21378,#21379,#21380,#21381,#21382,#21383));
#9301=EDGE_LOOP('',(#21384,#21385,#21386,#21387,#21388,#21389,#21390,#21391));
#9302=EDGE_LOOP('',(#21392,#21393,#21394,#21395,#21396,#21397,#21398,#21399));
#9303=EDGE_LOOP('',(#21400,#21401,#21402,#21403,#21404,#21405,#21406,#21407));
#9304=EDGE_LOOP('',(#21408,#21409,#21410,#21411,#21412,#21413,#21414,#21415));
#9305=EDGE_LOOP('',(#21416,#21417,#21418,#21419,#21420,#21421,#21422,#21423));
#9306=EDGE_LOOP('',(#21424,#21425,#21426,#21427,#21428,#21429,#21430,#21431));
#9307=EDGE_LOOP('',(#21432,#21433,#21434,#21435,#21436,#21437,#21438,#21439));
#9308=EDGE_LOOP('',(#21440,#21441,#21442,#21443,#21444,#21445,#21446,#21447));
#9309=EDGE_LOOP('',(#21448,#21449,#21450,#21451,#21452,#21453,#21454,#21455));
#9310=EDGE_LOOP('',(#21456,#21457,#21458,#21459,#21460,#21461,#21462,#21463));
#9311=EDGE_LOOP('',(#21464,#21465,#21466));
#9312=EDGE_LOOP('',(#21467,#21468,#21469,#21470,#21471,#21472,#21473,#21474));
#9313=EDGE_LOOP('',(#21475,#21476,#21477,#21478,#21479,#21480,#21481,#21482));
#9314=EDGE_LOOP('',(#21483,#21484,#21485,#21486,#21487,#21488,#21489,#21490));
#9315=EDGE_LOOP('',(#21491,#21492,#21493,#21494,#21495,#21496,#21497,#21498));
#9316=EDGE_LOOP('',(#21499,#21500,#21501,#21502,#21503,#21504,#21505,#21506));
#9317=EDGE_LOOP('',(#21507,#21508,#21509,#21510,#21511,#21512,#21513,#21514));
#9318=EDGE_LOOP('',(#21515,#21516,#21517,#21518,#21519,#21520,#21521,#21522));
#9319=EDGE_LOOP('',(#21523,#21524,#21525,#21526,#21527,#21528,#21529,#21530));
#9320=EDGE_LOOP('',(#21531,#21532,#21533,#21534,#21535,#21536,#21537,#21538));
#9321=EDGE_LOOP('',(#21539,#21540,#21541,#21542,#21543,#21544,#21545,#21546));
#9322=EDGE_LOOP('',(#21547,#21548,#21549,#21550,#21551,#21552,#21553,#21554));
#9323=EDGE_LOOP('',(#21555,#21556,#21557,#21558,#21559,#21560,#21561,#21562));
#9324=EDGE_LOOP('',(#21563,#21564,#21565,#21566,#21567,#21568,#21569,#21570));
#9325=EDGE_LOOP('',(#21571,#21572,#21573,#21574,#21575,#21576,#21577,#21578));
#9326=EDGE_LOOP('',(#21579,#21580,#21581,#21582,#21583,#21584,#21585,#21586));
#9327=EDGE_LOOP('',(#21587,#21588,#21589,#21590,#21591,#21592,#21593,#21594));
#9328=EDGE_LOOP('',(#21595,#21596,#21597,#21598,#21599,#21600,#21601,#21602));
#9329=EDGE_LOOP('',(#21603,#21604,#21605,#21606,#21607,#21608,#21609,#21610));
#9330=EDGE_LOOP('',(#21611,#21612,#21613,#21614,#21615,#21616,#21617,#21618));
#9331=EDGE_LOOP('',(#21619,#21620,#21621,#21622,#21623,#21624,#21625,#21626));
#9332=EDGE_LOOP('',(#21627,#21628,#21629,#21630,#21631,#21632,#21633,#21634));
#9333=EDGE_LOOP('',(#21635,#21636,#21637,#21638,#21639,#21640,#21641,#21642));
#9334=EDGE_LOOP('',(#21643,#21644,#21645,#21646,#21647,#21648,#21649,#21650));
#9335=EDGE_LOOP('',(#21651,#21652,#21653,#21654,#21655,#21656,#21657,#21658));
#9336=EDGE_LOOP('',(#21659,#21660,#21661,#21662,#21663,#21664,#21665,#21666));
#9337=EDGE_LOOP('',(#21667,#21668,#21669,#21670,#21671,#21672,#21673,#21674,
#21675,#21676));
#9338=EDGE_LOOP('',(#21677,#21678,#21679,#21680,#21681,#21682,#21683,#21684));
#9339=EDGE_LOOP('',(#21685,#21686,#21687,#21688,#21689,#21690,#21691,#21692));
#9340=EDGE_LOOP('',(#21693,#21694,#21695));
#9341=EDGE_LOOP('',(#21696,#21697,#21698,#21699,#21700,#21701,#21702,#21703));
#9342=EDGE_LOOP('',(#21704,#21705,#21706,#21707,#21708,#21709,#21710,#21711));
#9343=EDGE_LOOP('',(#21712,#21713,#21714,#21715,#21716,#21717,#21718,#21719));
#9344=EDGE_LOOP('',(#21720,#21721,#21722,#21723,#21724,#21725,#21726,#21727));
#9345=EDGE_LOOP('',(#21728,#21729,#21730,#21731,#21732,#21733,#21734,#21735));
#9346=EDGE_LOOP('',(#21736,#21737,#21738,#21739,#21740,#21741,#21742,#21743));
#9347=EDGE_LOOP('',(#21744,#21745,#21746,#21747,#21748,#21749,#21750,#21751));
#9348=EDGE_LOOP('',(#21752,#21753,#21754,#21755,#21756,#21757,#21758,#21759));
#9349=EDGE_LOOP('',(#21760,#21761,#21762,#21763,#21764,#21765,#21766,#21767));
#9350=EDGE_LOOP('',(#21768,#21769,#21770,#21771,#21772,#21773,#21774,#21775));
#9351=EDGE_LOOP('',(#21776,#21777,#21778,#21779,#21780,#21781,#21782,#21783));
#9352=EDGE_LOOP('',(#21784,#21785,#21786,#21787,#21788,#21789,#21790,#21791));
#9353=EDGE_LOOP('',(#21792,#21793,#21794,#21795,#21796,#21797,#21798,#21799));
#9354=EDGE_LOOP('',(#21800,#21801,#21802,#21803,#21804,#21805,#21806,#21807));
#9355=EDGE_LOOP('',(#21808,#21809,#21810,#21811,#21812,#21813,#21814,#21815));
#9356=EDGE_LOOP('',(#21816,#21817,#21818,#21819,#21820,#21821,#21822,#21823));
#9357=EDGE_LOOP('',(#21824,#21825,#21826));
#9358=EDGE_LOOP('',(#21827,#21828,#21829,#21830,#21831,#21832,#21833,#21834));
#9359=EDGE_LOOP('',(#21835,#21836,#21837,#21838,#21839,#21840,#21841,#21842));
#9360=EDGE_LOOP('',(#21843,#21844,#21845,#21846,#21847,#21848,#21849,#21850));
#9361=EDGE_LOOP('',(#21851,#21852,#21853,#21854,#21855,#21856,#21857,#21858));
#9362=EDGE_LOOP('',(#21859,#21860,#21861,#21862,#21863,#21864,#21865,#21866));
#9363=EDGE_LOOP('',(#21867,#21868,#21869,#21870,#21871,#21872,#21873,#21874));
#9364=EDGE_LOOP('',(#21875,#21876,#21877,#21878,#21879,#21880,#21881,#21882));
#9365=EDGE_LOOP('',(#21883,#21884,#21885,#21886,#21887,#21888,#21889,#21890));
#9366=EDGE_LOOP('',(#21891,#21892,#21893,#21894,#21895,#21896,#21897,#21898));
#9367=EDGE_LOOP('',(#21899,#21900,#21901,#21902,#21903,#21904,#21905,#21906));
#9368=EDGE_LOOP('',(#21907,#21908,#21909,#21910,#21911,#21912,#21913,#21914));
#9369=EDGE_LOOP('',(#21915,#21916,#21917,#21918,#21919,#21920,#21921,#21922));
#9370=EDGE_LOOP('',(#21923,#21924,#21925,#21926,#21927,#21928,#21929,#21930));
#9371=EDGE_LOOP('',(#21931,#21932,#21933,#21934,#21935,#21936,#21937,#21938));
#9372=EDGE_LOOP('',(#21939,#21940,#21941,#21942,#21943,#21944,#21945,#21946));
#9373=EDGE_LOOP('',(#21947,#21948,#21949,#21950,#21951,#21952,#21953,#21954));
#9374=EDGE_LOOP('',(#21955,#21956,#21957,#21958,#21959,#21960,#21961,#21962));
#9375=EDGE_LOOP('',(#21963,#21964,#21965,#21966,#21967,#21968,#21969,#21970));
#9376=EDGE_LOOP('',(#21971,#21972,#21973,#21974,#21975,#21976,#21977,#21978));
#9377=EDGE_LOOP('',(#21979,#21980,#21981,#21982,#21983,#21984,#21985,#21986));
#9378=EDGE_LOOP('',(#21987,#21988,#21989,#21990,#21991,#21992,#21993,#21994));
#9379=EDGE_LOOP('',(#21995,#21996,#21997,#21998,#21999,#22000,#22001,#22002));
#9380=EDGE_LOOP('',(#22003,#22004,#22005,#22006,#22007,#22008,#22009,#22010));
#9381=EDGE_LOOP('',(#22011,#22012,#22013));
#9382=EDGE_LOOP('',(#22014,#22015,#22016,#22017,#22018,#22019,#22020,#22021));
#9383=EDGE_LOOP('',(#22022,#22023,#22024,#22025,#22026,#22027,#22028,#22029));
#9384=EDGE_LOOP('',(#22030,#22031,#22032,#22033,#22034,#22035,#22036,#22037));
#9385=EDGE_LOOP('',(#22038,#22039,#22040,#22041,#22042,#22043,#22044,#22045));
#9386=EDGE_LOOP('',(#22046,#22047,#22048,#22049,#22050,#22051,#22052,#22053));
#9387=EDGE_LOOP('',(#22054,#22055,#22056,#22057,#22058,#22059,#22060,#22061));
#9388=EDGE_LOOP('',(#22062,#22063,#22064,#22065,#22066,#22067,#22068,#22069));
#9389=EDGE_LOOP('',(#22070,#22071,#22072,#22073,#22074,#22075,#22076,#22077));
#9390=EDGE_LOOP('',(#22078,#22079,#22080,#22081,#22082,#22083,#22084,#22085));
#9391=EDGE_LOOP('',(#22086,#22087,#22088,#22089,#22090,#22091,#22092,#22093));
#9392=EDGE_LOOP('',(#22094,#22095,#22096,#22097,#22098,#22099,#22100,#22101));
#9393=EDGE_LOOP('',(#22102,#22103,#22104,#22105,#22106,#22107,#22108,#22109));
#9394=EDGE_LOOP('',(#22110,#22111,#22112,#22113,#22114,#22115,#22116,#22117));
#9395=EDGE_LOOP('',(#22118,#22119,#22120,#22121,#22122,#22123,#22124,#22125));
#9396=EDGE_LOOP('',(#22126,#22127,#22128,#22129,#22130,#22131,#22132,#22133));
#9397=EDGE_LOOP('',(#22134,#22135,#22136,#22137,#22138,#22139,#22140,#22141));
#9398=EDGE_LOOP('',(#22142,#22143,#22144));
#9399=EDGE_LOOP('',(#22145,#22146,#22147,#22148,#22149,#22150,#22151,#22152));
#9400=EDGE_LOOP('',(#22153,#22154,#22155,#22156,#22157,#22158,#22159,#22160));
#9401=EDGE_LOOP('',(#22161,#22162,#22163,#22164,#22165,#22166,#22167,#22168));
#9402=EDGE_LOOP('',(#22169,#22170,#22171,#22172,#22173,#22174,#22175,#22176));
#9403=EDGE_LOOP('',(#22177,#22178,#22179,#22180,#22181,#22182,#22183,#22184));
#9404=EDGE_LOOP('',(#22185,#22186,#22187,#22188,#22189,#22190,#22191,#22192));
#9405=EDGE_LOOP('',(#22193,#22194,#22195,#22196,#22197,#22198,#22199,#22200));
#9406=EDGE_LOOP('',(#22201,#22202,#22203,#22204,#22205,#22206,#22207,#22208));
#9407=EDGE_LOOP('',(#22209,#22210,#22211,#22212,#22213,#22214,#22215,#22216));
#9408=EDGE_LOOP('',(#22217,#22218,#22219,#22220,#22221,#22222,#22223,#22224));
#9409=EDGE_LOOP('',(#22225,#22226,#22227,#22228,#22229,#22230,#22231,#22232));
#9410=EDGE_LOOP('',(#22233,#22234,#22235,#22236,#22237,#22238,#22239,#22240));
#9411=EDGE_LOOP('',(#22241,#22242,#22243,#22244,#22245,#22246,#22247,#22248));
#9412=EDGE_LOOP('',(#22249,#22250,#22251,#22252,#22253,#22254,#22255,#22256));
#9413=EDGE_LOOP('',(#22257,#22258,#22259,#22260,#22261,#22262,#22263,#22264));
#9414=EDGE_LOOP('',(#22265,#22266,#22267,#22268,#22269,#22270,#22271,#22272));
#9415=EDGE_LOOP('',(#22273,#22274,#22275,#22276,#22277,#22278,#22279,#22280));
#9416=EDGE_LOOP('',(#22281,#22282,#22283,#22284,#22285,#22286,#22287,#22288));
#9417=EDGE_LOOP('',(#22289,#22290,#22291,#22292,#22293,#22294,#22295,#22296));
#9418=EDGE_LOOP('',(#22297,#22298,#22299,#22300,#22301,#22302,#22303,#22304));
#9419=EDGE_LOOP('',(#22305,#22306,#22307,#22308,#22309,#22310,#22311,#22312,
#22313,#22314));
#9420=EDGE_LOOP('',(#22315,#22316,#22317,#22318,#22319,#22320,#22321,#22322,
#22323,#22324));
#9421=EDGE_LOOP('',(#22325,#22326,#22327,#22328,#22329,#22330,#22331,#22332));
#9422=EDGE_LOOP('',(#22333,#22334,#22335,#22336,#22337,#22338,#22339,#22340));
#9423=EDGE_LOOP('',(#22341,#22342,#22343,#22344,#22345,#22346,#22347,#22348));
#9424=EDGE_LOOP('',(#22349,#22350,#22351,#22352,#22353,#22354,#22355,#22356));
#9425=EDGE_LOOP('',(#22357,#22358,#22359,#22360,#22361,#22362,#22363,#22364));
#9426=EDGE_LOOP('',(#22365,#22366,#22367,#22368,#22369,#22370,#22371,#22372));
#9427=EDGE_LOOP('',(#22373,#22374,#22375,#22376,#22377,#22378,#22379,#22380));
#9428=EDGE_LOOP('',(#22381,#22382,#22383,#22384,#22385,#22386,#22387,#22388));
#9429=EDGE_LOOP('',(#22389,#22390,#22391,#22392,#22393,#22394,#22395,#22396));
#9430=EDGE_LOOP('',(#22397,#22398,#22399,#22400,#22401,#22402,#22403,#22404));
#9431=EDGE_LOOP('',(#22405,#22406,#22407,#22408));
#9432=EDGE_LOOP('',(#22409,#22410,#22411,#22412));
#9433=EDGE_LOOP('',(#22413,#22414,#22415,#22416));
#9434=EDGE_LOOP('',(#22417,#22418,#22419,#22420));
#9435=EDGE_LOOP('',(#22421,#22422,#22423,#22424));
#9436=EDGE_LOOP('',(#22425,#22426,#22427,#22428));
#9437=EDGE_LOOP('',(#22429,#22430,#22431,#22432));
#9438=EDGE_LOOP('',(#22433,#22434,#22435,#22436));
#9439=EDGE_LOOP('',(#22437,#22438,#22439,#22440));
#9440=EDGE_LOOP('',(#22441,#22442,#22443,#22444));
#9441=EDGE_LOOP('',(#22445,#22446,#22447,#22448));
#9442=EDGE_LOOP('',(#22449,#22450,#22451,#22452));
#9443=EDGE_LOOP('',(#22453,#22454,#22455,#22456));
#9444=EDGE_LOOP('',(#22457,#22458,#22459,#22460));
#9445=EDGE_LOOP('',(#22461,#22462,#22463,#22464));
#9446=EDGE_LOOP('',(#22465,#22466,#22467,#22468));
#9447=EDGE_LOOP('',(#22469,#22470,#22471,#22472));
#9448=EDGE_LOOP('',(#22473,#22474,#22475,#22476));
#9449=EDGE_LOOP('',(#22477,#22478,#22479,#22480));
#9450=EDGE_LOOP('',(#22481,#22482,#22483,#22484));
#9451=EDGE_LOOP('',(#22485,#22486,#22487,#22488));
#9452=EDGE_LOOP('',(#22489,#22490,#22491,#22492));
#9453=EDGE_LOOP('',(#22493,#22494,#22495,#22496));
#9454=EDGE_LOOP('',(#22497,#22498,#22499,#22500));
#9455=EDGE_LOOP('',(#22501,#22502,#22503,#22504));
#9456=EDGE_LOOP('',(#22505,#22506,#22507,#22508));
#9457=EDGE_LOOP('',(#22509,#22510,#22511,#22512));
#9458=EDGE_LOOP('',(#22513,#22514,#22515,#22516));
#9459=EDGE_LOOP('',(#22517,#22518,#22519,#22520));
#9460=EDGE_LOOP('',(#22521,#22522,#22523,#22524));
#9461=EDGE_LOOP('',(#22525,#22526,#22527,#22528));
#9462=EDGE_LOOP('',(#22529,#22530,#22531,#22532));
#9463=EDGE_LOOP('',(#22533,#22534,#22535,#22536));
#9464=EDGE_LOOP('',(#22537,#22538,#22539,#22540));
#9465=EDGE_LOOP('',(#22541,#22542,#22543,#22544));
#9466=EDGE_LOOP('',(#22545,#22546,#22547,#22548));
#9467=EDGE_LOOP('',(#22549,#22550,#22551,#22552));
#9468=EDGE_LOOP('',(#22553,#22554,#22555,#22556));
#9469=EDGE_LOOP('',(#22557,#22558,#22559,#22560));
#9470=EDGE_LOOP('',(#22561,#22562,#22563,#22564));
#9471=EDGE_LOOP('',(#22565,#22566,#22567,#22568));
#9472=EDGE_LOOP('',(#22569,#22570,#22571,#22572));
#9473=EDGE_LOOP('',(#22573,#22574,#22575,#22576));
#9474=EDGE_LOOP('',(#22577,#22578,#22579,#22580));
#9475=EDGE_LOOP('',(#22581,#22582,#22583,#22584));
#9476=EDGE_LOOP('',(#22585,#22586,#22587,#22588));
#9477=EDGE_LOOP('',(#22589,#22590,#22591,#22592));
#9478=EDGE_LOOP('',(#22593,#22594,#22595,#22596));
#9479=EDGE_LOOP('',(#22597,#22598,#22599,#22600));
#9480=EDGE_LOOP('',(#22601,#22602,#22603,#22604));
#9481=EDGE_LOOP('',(#22605,#22606,#22607,#22608));
#9482=EDGE_LOOP('',(#22609,#22610,#22611,#22612));
#9483=EDGE_LOOP('',(#22613,#22614,#22615,#22616));
#9484=EDGE_LOOP('',(#22617,#22618,#22619,#22620));
#9485=EDGE_LOOP('',(#22621,#22622,#22623,#22624));
#9486=EDGE_LOOP('',(#22625,#22626,#22627,#22628));
#9487=EDGE_LOOP('',(#22629,#22630,#22631,#22632));
#9488=EDGE_LOOP('',(#22633,#22634,#22635,#22636));
#9489=EDGE_LOOP('',(#22637,#22638,#22639,#22640));
#9490=EDGE_LOOP('',(#22641,#22642,#22643,#22644));
#9491=EDGE_LOOP('',(#22645,#22646,#22647,#22648));
#9492=EDGE_LOOP('',(#22649,#22650,#22651,#22652));
#9493=EDGE_LOOP('',(#22653,#22654,#22655,#22656));
#9494=EDGE_LOOP('',(#22657,#22658,#22659,#22660));
#9495=EDGE_LOOP('',(#22661,#22662,#22663,#22664));
#9496=EDGE_LOOP('',(#22665,#22666,#22667,#22668));
#9497=EDGE_LOOP('',(#22669,#22670,#22671,#22672));
#9498=EDGE_LOOP('',(#22673,#22674,#22675,#22676));
#9499=EDGE_LOOP('',(#22677,#22678,#22679,#22680));
#9500=EDGE_LOOP('',(#22681,#22682,#22683,#22684));
#9501=EDGE_LOOP('',(#22685,#22686,#22687,#22688));
#9502=EDGE_LOOP('',(#22689,#22690,#22691,#22692));
#9503=EDGE_LOOP('',(#22693,#22694,#22695,#22696));
#9504=EDGE_LOOP('',(#22697,#22698,#22699,#22700));
#9505=EDGE_LOOP('',(#22701,#22702,#22703,#22704));
#9506=EDGE_LOOP('',(#22705,#22706,#22707,#22708));
#9507=EDGE_LOOP('',(#22709,#22710,#22711,#22712));
#9508=EDGE_LOOP('',(#22713,#22714,#22715,#22716));
#9509=EDGE_LOOP('',(#22717,#22718,#22719,#22720));
#9510=EDGE_LOOP('',(#22721,#22722,#22723,#22724));
#9511=EDGE_LOOP('',(#22725,#22726,#22727,#22728));
#9512=EDGE_LOOP('',(#22729,#22730,#22731,#22732));
#9513=EDGE_LOOP('',(#22733,#22734,#22735,#22736));
#9514=EDGE_LOOP('',(#22737,#22738,#22739,#22740));
#9515=EDGE_LOOP('',(#22741,#22742,#22743,#22744));
#9516=EDGE_LOOP('',(#22745,#22746,#22747,#22748));
#9517=EDGE_LOOP('',(#22749,#22750,#22751,#22752));
#9518=EDGE_LOOP('',(#22753,#22754,#22755,#22756));
#9519=EDGE_LOOP('',(#22757,#22758,#22759,#22760));
#9520=EDGE_LOOP('',(#22761,#22762,#22763,#22764));
#9521=EDGE_LOOP('',(#22765,#22766,#22767,#22768));
#9522=EDGE_LOOP('',(#22769,#22770,#22771,#22772));
#9523=EDGE_LOOP('',(#22773,#22774,#22775,#22776));
#9524=EDGE_LOOP('',(#22777,#22778,#22779,#22780));
#9525=EDGE_LOOP('',(#22781,#22782,#22783,#22784));
#9526=EDGE_LOOP('',(#22785,#22786,#22787,#22788));
#9527=EDGE_LOOP('',(#22789,#22790,#22791,#22792));
#9528=EDGE_LOOP('',(#22793,#22794,#22795,#22796));
#9529=EDGE_LOOP('',(#22797,#22798,#22799,#22800));
#9530=EDGE_LOOP('',(#22801,#22802,#22803,#22804));
#9531=EDGE_LOOP('',(#22805,#22806,#22807,#22808));
#9532=EDGE_LOOP('',(#22809,#22810,#22811,#22812));
#9533=EDGE_LOOP('',(#22813,#22814,#22815,#22816));
#9534=EDGE_LOOP('',(#22817,#22818,#22819,#22820));
#9535=EDGE_LOOP('',(#22821,#22822,#22823,#22824));
#9536=EDGE_LOOP('',(#22825,#22826,#22827,#22828));
#9537=EDGE_LOOP('',(#22829,#22830,#22831,#22832));
#9538=EDGE_LOOP('',(#22833,#22834,#22835,#22836));
#9539=EDGE_LOOP('',(#22837,#22838,#22839,#22840));
#9540=EDGE_LOOP('',(#22841,#22842,#22843,#22844));
#9541=EDGE_LOOP('',(#22845,#22846,#22847,#22848));
#9542=EDGE_LOOP('',(#22849,#22850,#22851,#22852));
#9543=EDGE_LOOP('',(#22853,#22854,#22855,#22856));
#9544=EDGE_LOOP('',(#22857,#22858,#22859,#22860));
#9545=EDGE_LOOP('',(#22861,#22862,#22863,#22864));
#9546=EDGE_LOOP('',(#22865,#22866,#22867,#22868));
#9547=EDGE_LOOP('',(#22869,#22870,#22871,#22872));
#9548=EDGE_LOOP('',(#22873,#22874,#22875,#22876));
#9549=EDGE_LOOP('',(#22877,#22878,#22879,#22880));
#9550=EDGE_LOOP('',(#22881,#22882,#22883,#22884));
#9551=EDGE_LOOP('',(#22885,#22886,#22887,#22888));
#9552=EDGE_LOOP('',(#22889,#22890,#22891,#22892));
#9553=EDGE_LOOP('',(#22893,#22894,#22895,#22896));
#9554=EDGE_LOOP('',(#22897,#22898,#22899,#22900));
#9555=EDGE_LOOP('',(#22901,#22902,#22903,#22904));
#9556=EDGE_LOOP('',(#22905,#22906,#22907,#22908));
#9557=EDGE_LOOP('',(#22909,#22910,#22911,#22912));
#9558=EDGE_LOOP('',(#22913,#22914,#22915,#22916));
#9559=EDGE_LOOP('',(#22917,#22918,#22919,#22920));
#9560=EDGE_LOOP('',(#22921,#22922,#22923,#22924));
#9561=EDGE_LOOP('',(#22925,#22926,#22927,#22928));
#9562=EDGE_LOOP('',(#22929,#22930,#22931,#22932));
#9563=EDGE_LOOP('',(#22933,#22934,#22935,#22936));
#9564=EDGE_LOOP('',(#22937,#22938,#22939,#22940));
#9565=EDGE_LOOP('',(#22941,#22942,#22943,#22944));
#9566=EDGE_LOOP('',(#22945,#22946,#22947,#22948));
#9567=EDGE_LOOP('',(#22949,#22950,#22951,#22952));
#9568=EDGE_LOOP('',(#22953,#22954,#22955,#22956));
#9569=EDGE_LOOP('',(#22957,#22958,#22959,#22960));
#9570=EDGE_LOOP('',(#22961,#22962,#22963,#22964));
#9571=EDGE_LOOP('',(#22965,#22966,#22967,#22968));
#9572=EDGE_LOOP('',(#22969,#22970,#22971,#22972));
#9573=EDGE_LOOP('',(#22973,#22974,#22975,#22976));
#9574=EDGE_LOOP('',(#22977,#22978,#22979,#22980));
#9575=EDGE_LOOP('',(#22981,#22982,#22983,#22984));
#9576=EDGE_LOOP('',(#22985,#22986,#22987,#22988));
#9577=EDGE_LOOP('',(#22989,#22990,#22991,#22992));
#9578=EDGE_LOOP('',(#22993,#22994,#22995,#22996));
#9579=EDGE_LOOP('',(#22997,#22998,#22999));
#9580=EDGE_LOOP('',(#23000,#23001,#23002));
#9581=EDGE_LOOP('',(#23003,#23004,#23005,#23006));
#9582=EDGE_LOOP('',(#23007,#23008,#23009,#23010));
#9583=EDGE_LOOP('',(#23011,#23012,#23013,#23014));
#9584=EDGE_LOOP('',(#23015,#23016,#23017,#23018));
#9585=EDGE_LOOP('',(#23019,#23020,#23021,#23022));
#9586=EDGE_LOOP('',(#23023,#23024,#23025,#23026));
#9587=EDGE_LOOP('',(#23027,#23028,#23029,#23030));
#9588=EDGE_LOOP('',(#23031,#23032,#23033,#23034));
#9589=EDGE_LOOP('',(#23035,#23036,#23037,#23038));
#9590=EDGE_LOOP('',(#23039,#23040,#23041,#23042));
#9591=EDGE_LOOP('',(#23043,#23044,#23045,#23046));
#9592=EDGE_LOOP('',(#23047,#23048,#23049,#23050));
#9593=EDGE_LOOP('',(#23051,#23052,#23053,#23054));
#9594=EDGE_LOOP('',(#23055,#23056,#23057,#23058));
#9595=EDGE_LOOP('',(#23059,#23060,#23061,#23062));
#9596=EDGE_LOOP('',(#23063,#23064,#23065,#23066));
#9597=EDGE_LOOP('',(#23067,#23068,#23069,#23070));
#9598=EDGE_LOOP('',(#23071,#23072,#23073,#23074));
#9599=EDGE_LOOP('',(#23075,#23076,#23077,#23078));
#9600=EDGE_LOOP('',(#23079,#23080,#23081,#23082));
#9601=EDGE_LOOP('',(#23083,#23084,#23085,#23086));
#9602=EDGE_LOOP('',(#23087,#23088,#23089,#23090));
#9603=EDGE_LOOP('',(#23091,#23092,#23093,#23094));
#9604=EDGE_LOOP('',(#23095,#23096,#23097,#23098));
#9605=EDGE_LOOP('',(#23099,#23100,#23101,#23102));
#9606=EDGE_LOOP('',(#23103,#23104,#23105,#23106));
#9607=EDGE_LOOP('',(#23107,#23108,#23109,#23110));
#9608=EDGE_LOOP('',(#23111,#23112,#23113,#23114));
#9609=EDGE_LOOP('',(#23115,#23116,#23117,#23118));
#9610=EDGE_LOOP('',(#23119,#23120,#23121,#23122));
#9611=EDGE_LOOP('',(#23123,#23124,#23125,#23126));
#9612=EDGE_LOOP('',(#23127,#23128,#23129,#23130));
#9613=EDGE_LOOP('',(#23131,#23132,#23133));
#9614=EDGE_LOOP('',(#23134,#23135,#23136,#23137));
#9615=EDGE_LOOP('',(#23138,#23139,#23140,#23141));
#9616=EDGE_LOOP('',(#23142,#23143,#23144,#23145));
#9617=EDGE_LOOP('',(#23146));
#9618=EDGE_LOOP('',(#23147));
#9619=EDGE_LOOP('',(#23148));
#9620=EDGE_LOOP('',(#23149));
#9621=EDGE_LOOP('',(#23150));
#9622=EDGE_LOOP('',(#23151));
#9623=EDGE_LOOP('',(#23152,#23153,#23154,#23155));
#9624=EDGE_LOOP('',(#23156,#23157,#23158,#23159));
#9625=EDGE_LOOP('',(#23160,#23161,#23162,#23163));
#9626=EDGE_LOOP('',(#23164,#23165,#23166,#23167));
#9627=EDGE_LOOP('',(#23168,#23169,#23170,#23171));
#9628=EDGE_LOOP('',(#23172,#23173,#23174,#23175));
#9629=EDGE_LOOP('',(#23176,#23177,#23178,#23179));
#9630=EDGE_LOOP('',(#23180,#23181,#23182,#23183));
#9631=EDGE_LOOP('',(#23184,#23185,#23186,#23187));
#9632=EDGE_LOOP('',(#23188,#23189,#23190,#23191));
#9633=EDGE_LOOP('',(#23192,#23193,#23194,#23195));
#9634=EDGE_LOOP('',(#23196,#23197,#23198,#23199));
#9635=EDGE_LOOP('',(#23200,#23201,#23202,#23203));
#9636=EDGE_LOOP('',(#23204,#23205,#23206,#23207));
#9637=EDGE_LOOP('',(#23208,#23209,#23210,#23211));
#9638=EDGE_LOOP('',(#23212,#23213,#23214,#23215));
#9639=EDGE_LOOP('',(#23216,#23217,#23218,#23219));
#9640=EDGE_LOOP('',(#23220,#23221,#23222,#23223));
#9641=EDGE_LOOP('',(#23224,#23225,#23226,#23227));
#9642=EDGE_LOOP('',(#23228,#23229,#23230,#23231));
#9643=EDGE_LOOP('',(#23232,#23233,#23234,#23235));
#9644=EDGE_LOOP('',(#23236,#23237,#23238,#23239));
#9645=EDGE_LOOP('',(#23240,#23241,#23242,#23243));
#9646=EDGE_LOOP('',(#23244,#23245,#23246,#23247));
#9647=EDGE_LOOP('',(#23248,#23249,#23250,#23251));
#9648=EDGE_LOOP('',(#23252,#23253,#23254,#23255));
#9649=EDGE_LOOP('',(#23256,#23257,#23258,#23259));
#9650=EDGE_LOOP('',(#23260,#23261,#23262,#23263));
#9651=EDGE_LOOP('',(#23264,#23265,#23266,#23267));
#9652=EDGE_LOOP('',(#23268,#23269,#23270,#23271));
#9653=EDGE_LOOP('',(#23272,#23273,#23274,#23275));
#9654=EDGE_LOOP('',(#23276,#23277,#23278,#23279));
#9655=EDGE_LOOP('',(#23280,#23281,#23282,#23283));
#9656=EDGE_LOOP('',(#23284,#23285,#23286,#23287));
#9657=EDGE_LOOP('',(#23288,#23289,#23290,#23291));
#9658=EDGE_LOOP('',(#23292,#23293,#23294,#23295));
#9659=EDGE_LOOP('',(#23296,#23297,#23298,#23299));
#9660=EDGE_LOOP('',(#23300,#23301,#23302,#23303));
#9661=EDGE_LOOP('',(#23304,#23305,#23306,#23307));
#9662=EDGE_LOOP('',(#23308,#23309,#23310,#23311));
#9663=EDGE_LOOP('',(#23312,#23313,#23314,#23315));
#9664=EDGE_LOOP('',(#23316,#23317,#23318,#23319));
#9665=EDGE_LOOP('',(#23320,#23321,#23322,#23323));
#9666=EDGE_LOOP('',(#23324,#23325,#23326,#23327));
#9667=EDGE_LOOP('',(#23328,#23329,#23330,#23331));
#9668=EDGE_LOOP('',(#23332,#23333,#23334,#23335));
#9669=EDGE_LOOP('',(#23336,#23337,#23338,#23339));
#9670=EDGE_LOOP('',(#23340,#23341,#23342,#23343));
#9671=EDGE_LOOP('',(#23344,#23345,#23346,#23347));
#9672=EDGE_LOOP('',(#23348,#23349,#23350,#23351));
#9673=EDGE_LOOP('',(#23352,#23353,#23354,#23355));
#9674=EDGE_LOOP('',(#23356,#23357,#23358,#23359));
#9675=EDGE_LOOP('',(#23360,#23361,#23362,#23363));
#9676=EDGE_LOOP('',(#23364,#23365,#23366,#23367));
#9677=EDGE_LOOP('',(#23368,#23369,#23370,#23371));
#9678=EDGE_LOOP('',(#23372,#23373,#23374,#23375));
#9679=EDGE_LOOP('',(#23376,#23377,#23378,#23379));
#9680=EDGE_LOOP('',(#23380,#23381,#23382,#23383));
#9681=EDGE_LOOP('',(#23384,#23385,#23386,#23387));
#9682=EDGE_LOOP('',(#23388,#23389,#23390,#23391));
#9683=EDGE_LOOP('',(#23392,#23393,#23394,#23395));
#9684=EDGE_LOOP('',(#23396,#23397,#23398,#23399));
#9685=EDGE_LOOP('',(#23400,#23401,#23402,#23403));
#9686=EDGE_LOOP('',(#23404,#23405,#23406,#23407));
#9687=EDGE_LOOP('',(#23408,#23409,#23410,#23411));
#9688=EDGE_LOOP('',(#23412,#23413,#23414,#23415));
#9689=EDGE_LOOP('',(#23416,#23417,#23418,#23419));
#9690=EDGE_LOOP('',(#23420,#23421,#23422,#23423));
#9691=EDGE_LOOP('',(#23424,#23425,#23426,#23427));
#9692=EDGE_LOOP('',(#23428,#23429,#23430,#23431));
#9693=EDGE_LOOP('',(#23432,#23433,#23434,#23435));
#9694=EDGE_LOOP('',(#23436,#23437,#23438,#23439));
#9695=EDGE_LOOP('',(#23440,#23441,#23442,#23443));
#9696=EDGE_LOOP('',(#23444,#23445,#23446,#23447));
#9697=EDGE_LOOP('',(#23448,#23449,#23450,#23451));
#9698=EDGE_LOOP('',(#23452,#23453,#23454,#23455));
#9699=EDGE_LOOP('',(#23456,#23457,#23458,#23459));
#9700=EDGE_LOOP('',(#23460,#23461,#23462,#23463));
#9701=EDGE_LOOP('',(#23464,#23465,#23466,#23467));
#9702=EDGE_LOOP('',(#23468,#23469,#23470,#23471));
#9703=EDGE_LOOP('',(#23472,#23473,#23474,#23475));
#9704=EDGE_LOOP('',(#23476,#23477,#23478,#23479));
#9705=EDGE_LOOP('',(#23480,#23481,#23482,#23483));
#9706=EDGE_LOOP('',(#23484,#23485,#23486,#23487));
#9707=EDGE_LOOP('',(#23488,#23489,#23490,#23491));
#9708=EDGE_LOOP('',(#23492,#23493,#23494,#23495));
#9709=EDGE_LOOP('',(#23496,#23497,#23498,#23499));
#9710=EDGE_LOOP('',(#23500,#23501,#23502,#23503));
#9711=EDGE_LOOP('',(#23504,#23505,#23506,#23507));
#9712=EDGE_LOOP('',(#23508,#23509,#23510,#23511));
#9713=EDGE_LOOP('',(#23512,#23513,#23514,#23515));
#9714=EDGE_LOOP('',(#23516,#23517,#23518,#23519));
#9715=EDGE_LOOP('',(#23520,#23521,#23522,#23523));
#9716=EDGE_LOOP('',(#23524,#23525,#23526,#23527));
#9717=EDGE_LOOP('',(#23528,#23529,#23530,#23531));
#9718=EDGE_LOOP('',(#23532,#23533,#23534,#23535));
#9719=EDGE_LOOP('',(#23536,#23537,#23538,#23539));
#9720=EDGE_LOOP('',(#23540,#23541,#23542,#23543));
#9721=EDGE_LOOP('',(#23544,#23545,#23546,#23547));
#9722=EDGE_LOOP('',(#23548,#23549,#23550,#23551));
#9723=EDGE_LOOP('',(#23552,#23553,#23554,#23555));
#9724=EDGE_LOOP('',(#23556,#23557,#23558,#23559));
#9725=EDGE_LOOP('',(#23560,#23561,#23562,#23563));
#9726=EDGE_LOOP('',(#23564,#23565,#23566,#23567));
#9727=EDGE_LOOP('',(#23568,#23569,#23570,#23571));
#9728=EDGE_LOOP('',(#23572,#23573,#23574,#23575));
#9729=EDGE_LOOP('',(#23576,#23577,#23578,#23579));
#9730=EDGE_LOOP('',(#23580,#23581,#23582,#23583));
#9731=EDGE_LOOP('',(#23584,#23585,#23586,#23587));
#9732=EDGE_LOOP('',(#23588,#23589,#23590,#23591));
#9733=EDGE_LOOP('',(#23592,#23593,#23594,#23595));
#9734=EDGE_LOOP('',(#23596,#23597,#23598,#23599));
#9735=EDGE_LOOP('',(#23600,#23601,#23602,#23603));
#9736=EDGE_LOOP('',(#23604,#23605,#23606,#23607));
#9737=EDGE_LOOP('',(#23608,#23609,#23610,#23611));
#9738=EDGE_LOOP('',(#23612,#23613,#23614,#23615));
#9739=EDGE_LOOP('',(#23616,#23617,#23618,#23619));
#9740=EDGE_LOOP('',(#23620,#23621,#23622,#23623));
#9741=EDGE_LOOP('',(#23624,#23625,#23626,#23627));
#9742=EDGE_LOOP('',(#23628,#23629,#23630,#23631));
#9743=EDGE_LOOP('',(#23632,#23633,#23634,#23635));
#9744=EDGE_LOOP('',(#23636,#23637,#23638,#23639));
#9745=EDGE_LOOP('',(#23640,#23641,#23642,#23643));
#9746=EDGE_LOOP('',(#23644,#23645,#23646,#23647));
#9747=EDGE_LOOP('',(#23648,#23649,#23650,#23651));
#9748=EDGE_LOOP('',(#23652,#23653,#23654,#23655));
#9749=EDGE_LOOP('',(#23656,#23657,#23658,#23659));
#9750=EDGE_LOOP('',(#23660,#23661,#23662,#23663));
#9751=EDGE_LOOP('',(#23664,#23665,#23666,#23667));
#9752=EDGE_LOOP('',(#23668,#23669,#23670,#23671));
#9753=EDGE_LOOP('',(#23672,#23673,#23674,#23675));
#9754=EDGE_LOOP('',(#23676,#23677,#23678,#23679));
#9755=EDGE_LOOP('',(#23680,#23681,#23682,#23683));
#9756=EDGE_LOOP('',(#23684,#23685,#23686,#23687));
#9757=EDGE_LOOP('',(#23688,#23689,#23690,#23691));
#9758=EDGE_LOOP('',(#23692,#23693,#23694,#23695));
#9759=EDGE_LOOP('',(#23696,#23697,#23698,#23699));
#9760=EDGE_LOOP('',(#23700,#23701,#23702,#23703));
#9761=EDGE_LOOP('',(#23704,#23705,#23706,#23707));
#9762=EDGE_LOOP('',(#23708,#23709,#23710,#23711));
#9763=EDGE_LOOP('',(#23712,#23713,#23714,#23715));
#9764=EDGE_LOOP('',(#23716,#23717,#23718,#23719));
#9765=EDGE_LOOP('',(#23720,#23721,#23722));
#9766=EDGE_LOOP('',(#23723,#23724,#23725));
#9767=EDGE_LOOP('',(#23726,#23727,#23728,#23729));
#9768=EDGE_LOOP('',(#23730,#23731,#23732,#23733));
#9769=EDGE_LOOP('',(#23734,#23735,#23736,#23737));
#9770=EDGE_LOOP('',(#23738,#23739,#23740,#23741));
#9771=EDGE_LOOP('',(#23742,#23743,#23744,#23745));
#9772=EDGE_LOOP('',(#23746,#23747,#23748,#23749));
#9773=EDGE_LOOP('',(#23750,#23751,#23752,#23753));
#9774=EDGE_LOOP('',(#23754,#23755,#23756,#23757));
#9775=EDGE_LOOP('',(#23758,#23759,#23760,#23761));
#9776=EDGE_LOOP('',(#23762,#23763,#23764,#23765));
#9777=EDGE_LOOP('',(#23766,#23767,#23768,#23769));
#9778=EDGE_LOOP('',(#23770,#23771,#23772,#23773));
#9779=EDGE_LOOP('',(#23774,#23775,#23776,#23777));
#9780=EDGE_LOOP('',(#23778,#23779,#23780,#23781));
#9781=EDGE_LOOP('',(#23782,#23783,#23784,#23785));
#9782=EDGE_LOOP('',(#23786,#23787,#23788,#23789));
#9783=EDGE_LOOP('',(#23790,#23791,#23792,#23793));
#9784=EDGE_LOOP('',(#23794,#23795,#23796,#23797));
#9785=EDGE_LOOP('',(#23798,#23799,#23800,#23801));
#9786=EDGE_LOOP('',(#23802,#23803,#23804,#23805));
#9787=EDGE_LOOP('',(#23806,#23807,#23808,#23809));
#9788=EDGE_LOOP('',(#23810,#23811,#23812,#23813));
#9789=EDGE_LOOP('',(#23814,#23815,#23816,#23817));
#9790=EDGE_LOOP('',(#23818,#23819,#23820,#23821));
#9791=EDGE_LOOP('',(#23822,#23823,#23824,#23825));
#9792=EDGE_LOOP('',(#23826,#23827,#23828,#23829));
#9793=EDGE_LOOP('',(#23830,#23831,#23832,#23833));
#9794=EDGE_LOOP('',(#23834,#23835,#23836,#23837));
#9795=EDGE_LOOP('',(#23838,#23839,#23840,#23841));
#9796=EDGE_LOOP('',(#23842,#23843,#23844,#23845));
#9797=EDGE_LOOP('',(#23846,#23847,#23848,#23849));
#9798=EDGE_LOOP('',(#23850,#23851,#23852,#23853));
#9799=EDGE_LOOP('',(#23854,#23855,#23856));
#9800=EDGE_LOOP('',(#23857,#23858,#23859,#23860));
#9801=EDGE_LOOP('',(#23861,#23862,#23863,#23864));
#9802=EDGE_LOOP('',(#23865,#23866,#23867,#23868));
#9803=EDGE_LOOP('',(#23869,#23870,#23871,#23872));
#9804=EDGE_LOOP('',(#23873,#23874,#23875,#23876));
#9805=EDGE_LOOP('',(#23877,#23878,#23879,#23880));
#9806=EDGE_LOOP('',(#23881,#23882,#23883,#23884));
#9807=EDGE_LOOP('',(#23885,#23886,#23887,#23888));
#9808=EDGE_LOOP('',(#23889,#23890,#23891,#23892));
#9809=EDGE_LOOP('',(#23893,#23894,#23895,#23896));
#9810=EDGE_LOOP('',(#23897,#23898,#23899,#23900));
#9811=EDGE_LOOP('',(#23901,#23902,#23903,#23904));
#9812=EDGE_LOOP('',(#23905,#23906,#23907,#23908));
#9813=EDGE_LOOP('',(#23909,#23910,#23911,#23912));
#9814=EDGE_LOOP('',(#23913,#23914,#23915,#23916));
#9815=EDGE_LOOP('',(#23917,#23918,#23919,#23920));
#9816=EDGE_LOOP('',(#23921,#23922,#23923,#23924));
#9817=EDGE_LOOP('',(#23925,#23926,#23927,#23928));
#9818=EDGE_LOOP('',(#23929,#23930,#23931,#23932));
#9819=EDGE_LOOP('',(#23933,#23934,#23935,#23936));
#9820=EDGE_LOOP('',(#23937,#23938,#23939,#23940));
#9821=EDGE_LOOP('',(#23941,#23942,#23943,#23944));
#9822=EDGE_LOOP('',(#23945,#23946,#23947,#23948));
#9823=EDGE_LOOP('',(#23949,#23950,#23951,#23952));
#9824=EDGE_LOOP('',(#23953,#23954,#23955,#23956));
#9825=EDGE_LOOP('',(#23957,#23958,#23959,#23960));
#9826=EDGE_LOOP('',(#23961,#23962,#23963,#23964));
#9827=EDGE_LOOP('',(#23965,#23966,#23967,#23968));
#9828=EDGE_LOOP('',(#23969,#23970,#23971,#23972));
#9829=EDGE_LOOP('',(#23973,#23974,#23975,#23976));
#9830=EDGE_LOOP('',(#23977,#23978,#23979,#23980));
#9831=EDGE_LOOP('',(#23981,#23982,#23983,#23984));
#9832=EDGE_LOOP('',(#23985,#23986,#23987,#23988));
#9833=EDGE_LOOP('',(#23989,#23990,#23991,#23992));
#9834=EDGE_LOOP('',(#23993,#23994,#23995,#23996));
#9835=EDGE_LOOP('',(#23997,#23998,#23999,#24000));
#9836=EDGE_LOOP('',(#24001,#24002,#24003,#24004));
#9837=EDGE_LOOP('',(#24005,#24006,#24007,#24008));
#9838=EDGE_LOOP('',(#24009,#24010,#24011,#24012));
#9839=EDGE_LOOP('',(#24013,#24014,#24015,#24016));
#9840=EDGE_LOOP('',(#24017,#24018,#24019,#24020));
#9841=EDGE_LOOP('',(#24021,#24022,#24023,#24024));
#9842=EDGE_LOOP('',(#24025,#24026,#24027,#24028));
#9843=EDGE_LOOP('',(#24029,#24030,#24031,#24032));
#9844=EDGE_LOOP('',(#24033,#24034,#24035,#24036));
#9845=EDGE_LOOP('',(#24037,#24038,#24039,#24040));
#9846=EDGE_LOOP('',(#24041,#24042,#24043,#24044));
#9847=EDGE_LOOP('',(#24045,#24046,#24047,#24048));
#9848=EDGE_LOOP('',(#24049,#24050,#24051,#24052));
#9849=EDGE_LOOP('',(#24053,#24054,#24055,#24056));
#9850=EDGE_LOOP('',(#24057,#24058,#24059,#24060));
#9851=EDGE_LOOP('',(#24061,#24062,#24063,#24064));
#9852=EDGE_LOOP('',(#24065,#24066,#24067,#24068));
#9853=EDGE_LOOP('',(#24069,#24070,#24071,#24072));
#9854=EDGE_LOOP('',(#24073,#24074,#24075,#24076));
#9855=EDGE_LOOP('',(#24077,#24078,#24079,#24080));
#9856=EDGE_LOOP('',(#24081,#24082,#24083,#24084));
#9857=EDGE_LOOP('',(#24085,#24086,#24087,#24088));
#9858=EDGE_LOOP('',(#24089,#24090,#24091,#24092));
#9859=EDGE_LOOP('',(#24093,#24094,#24095,#24096));
#9860=EDGE_LOOP('',(#24097,#24098,#24099,#24100));
#9861=EDGE_LOOP('',(#24101,#24102,#24103,#24104));
#9862=EDGE_LOOP('',(#24105,#24106,#24107,#24108));
#9863=EDGE_LOOP('',(#24109,#24110,#24111,#24112));
#9864=EDGE_LOOP('',(#24113,#24114,#24115,#24116));
#9865=EDGE_LOOP('',(#24117,#24118,#24119,#24120));
#9866=EDGE_LOOP('',(#24121,#24122,#24123,#24124));
#9867=EDGE_LOOP('',(#24125,#24126,#24127,#24128));
#9868=EDGE_LOOP('',(#24129,#24130,#24131,#24132));
#9869=EDGE_LOOP('',(#24133,#24134,#24135,#24136));
#9870=EDGE_LOOP('',(#24137,#24138,#24139,#24140));
#9871=EDGE_LOOP('',(#24141,#24142,#24143,#24144));
#9872=EDGE_LOOP('',(#24145,#24146,#24147,#24148));
#9873=EDGE_LOOP('',(#24149,#24150,#24151,#24152));
#9874=EDGE_LOOP('',(#24153,#24154,#24155,#24156));
#9875=EDGE_LOOP('',(#24157,#24158,#24159,#24160));
#9876=EDGE_LOOP('',(#24161,#24162,#24163,#24164));
#9877=EDGE_LOOP('',(#24165,#24166,#24167,#24168));
#9878=EDGE_LOOP('',(#24169,#24170,#24171,#24172));
#9879=EDGE_LOOP('',(#24173,#24174,#24175,#24176));
#9880=EDGE_LOOP('',(#24177,#24178,#24179,#24180));
#9881=EDGE_LOOP('',(#24181,#24182,#24183,#24184));
#9882=EDGE_LOOP('',(#24185,#24186,#24187,#24188));
#9883=EDGE_LOOP('',(#24189,#24190,#24191,#24192));
#9884=EDGE_LOOP('',(#24193,#24194,#24195,#24196));
#9885=EDGE_LOOP('',(#24197,#24198,#24199,#24200));
#9886=EDGE_LOOP('',(#24201,#24202,#24203,#24204));
#9887=EDGE_LOOP('',(#24205,#24206,#24207,#24208));
#9888=EDGE_LOOP('',(#24209,#24210,#24211,#24212));
#9889=EDGE_LOOP('',(#24213,#24214,#24215,#24216));
#9890=EDGE_LOOP('',(#24217,#24218,#24219,#24220));
#9891=EDGE_LOOP('',(#24221,#24222,#24223,#24224));
#9892=EDGE_LOOP('',(#24225,#24226,#24227,#24228));
#9893=EDGE_LOOP('',(#24229,#24230,#24231,#24232));
#9894=EDGE_LOOP('',(#24233,#24234,#24235,#24236));
#9895=EDGE_LOOP('',(#24237,#24238,#24239,#24240));
#9896=EDGE_LOOP('',(#24241,#24242,#24243,#24244));
#9897=EDGE_LOOP('',(#24245,#24246,#24247,#24248));
#9898=EDGE_LOOP('',(#24249,#24250,#24251,#24252));
#9899=EDGE_LOOP('',(#24253,#24254,#24255,#24256));
#9900=EDGE_LOOP('',(#24257,#24258,#24259,#24260));
#9901=EDGE_LOOP('',(#24261,#24262,#24263,#24264));
#9902=EDGE_LOOP('',(#24265,#24266,#24267,#24268));
#9903=EDGE_LOOP('',(#24269,#24270,#24271,#24272));
#9904=EDGE_LOOP('',(#24273,#24274,#24275,#24276));
#9905=EDGE_LOOP('',(#24277,#24278,#24279,#24280));
#9906=EDGE_LOOP('',(#24281,#24282,#24283,#24284));
#9907=EDGE_LOOP('',(#24285,#24286,#24287,#24288));
#9908=EDGE_LOOP('',(#24289,#24290,#24291,#24292));
#9909=EDGE_LOOP('',(#24293,#24294,#24295,#24296));
#9910=EDGE_LOOP('',(#24297,#24298,#24299,#24300));
#9911=EDGE_LOOP('',(#24301,#24302,#24303,#24304));
#9912=EDGE_LOOP('',(#24305,#24306,#24307,#24308));
#9913=EDGE_LOOP('',(#24309,#24310,#24311,#24312));
#9914=EDGE_LOOP('',(#24313,#24314,#24315,#24316));
#9915=EDGE_LOOP('',(#24317,#24318,#24319,#24320));
#9916=EDGE_LOOP('',(#24321,#24322,#24323,#24324));
#9917=EDGE_LOOP('',(#24325,#24326,#24327,#24328));
#9918=EDGE_LOOP('',(#24329,#24330,#24331,#24332));
#9919=EDGE_LOOP('',(#24333,#24334,#24335,#24336));
#9920=EDGE_LOOP('',(#24337,#24338,#24339,#24340));
#9921=EDGE_LOOP('',(#24341,#24342,#24343,#24344));
#9922=EDGE_LOOP('',(#24345,#24346,#24347,#24348));
#9923=EDGE_LOOP('',(#24349,#24350,#24351,#24352));
#9924=EDGE_LOOP('',(#24353,#24354,#24355,#24356));
#9925=EDGE_LOOP('',(#24357,#24358,#24359,#24360));
#9926=EDGE_LOOP('',(#24361,#24362,#24363,#24364));
#9927=EDGE_LOOP('',(#24365,#24366,#24367,#24368));
#9928=EDGE_LOOP('',(#24369,#24370,#24371,#24372));
#9929=EDGE_LOOP('',(#24373,#24374,#24375,#24376));
#9930=EDGE_LOOP('',(#24377,#24378,#24379,#24380));
#9931=EDGE_LOOP('',(#24381,#24382,#24383,#24384));
#9932=EDGE_LOOP('',(#24385,#24386,#24387,#24388));
#9933=EDGE_LOOP('',(#24389,#24390,#24391,#24392));
#9934=EDGE_LOOP('',(#24393,#24394,#24395,#24396));
#9935=EDGE_LOOP('',(#24397,#24398,#24399,#24400));
#9936=EDGE_LOOP('',(#24401,#24402,#24403,#24404));
#9937=EDGE_LOOP('',(#24405,#24406,#24407,#24408));
#9938=EDGE_LOOP('',(#24409,#24410,#24411,#24412));
#9939=EDGE_LOOP('',(#24413,#24414,#24415,#24416));
#9940=EDGE_LOOP('',(#24417,#24418,#24419,#24420));
#9941=EDGE_LOOP('',(#24421,#24422,#24423,#24424));
#9942=EDGE_LOOP('',(#24425,#24426,#24427,#24428));
#9943=EDGE_LOOP('',(#24429,#24430,#24431,#24432));
#9944=EDGE_LOOP('',(#24433,#24434,#24435,#24436));
#9945=EDGE_LOOP('',(#24437,#24438,#24439,#24440));
#9946=EDGE_LOOP('',(#24441,#24442,#24443,#24444));
#9947=EDGE_LOOP('',(#24445,#24446,#24447,#24448));
#9948=EDGE_LOOP('',(#24449,#24450,#24451,#24452));
#9949=EDGE_LOOP('',(#24453,#24454,#24455,#24456));
#9950=EDGE_LOOP('',(#24457,#24458,#24459,#24460));
#9951=EDGE_LOOP('',(#24461,#24462,#24463));
#9952=EDGE_LOOP('',(#24464,#24465,#24466));
#9953=EDGE_LOOP('',(#24467,#24468,#24469,#24470));
#9954=EDGE_LOOP('',(#24471,#24472,#24473,#24474));
#9955=EDGE_LOOP('',(#24475,#24476,#24477,#24478));
#9956=EDGE_LOOP('',(#24479,#24480,#24481,#24482));
#9957=EDGE_LOOP('',(#24483,#24484,#24485,#24486));
#9958=EDGE_LOOP('',(#24487,#24488,#24489,#24490));
#9959=EDGE_LOOP('',(#24491,#24492,#24493,#24494));
#9960=EDGE_LOOP('',(#24495,#24496,#24497,#24498));
#9961=EDGE_LOOP('',(#24499,#24500,#24501,#24502));
#9962=EDGE_LOOP('',(#24503,#24504,#24505,#24506));
#9963=EDGE_LOOP('',(#24507,#24508,#24509,#24510));
#9964=EDGE_LOOP('',(#24511,#24512,#24513,#24514));
#9965=EDGE_LOOP('',(#24515,#24516,#24517,#24518));
#9966=EDGE_LOOP('',(#24519,#24520,#24521,#24522));
#9967=EDGE_LOOP('',(#24523,#24524,#24525,#24526));
#9968=EDGE_LOOP('',(#24527,#24528,#24529,#24530));
#9969=EDGE_LOOP('',(#24531,#24532,#24533,#24534));
#9970=EDGE_LOOP('',(#24535,#24536,#24537,#24538));
#9971=EDGE_LOOP('',(#24539,#24540,#24541,#24542));
#9972=EDGE_LOOP('',(#24543,#24544,#24545,#24546));
#9973=EDGE_LOOP('',(#24547,#24548,#24549,#24550));
#9974=EDGE_LOOP('',(#24551,#24552,#24553,#24554));
#9975=EDGE_LOOP('',(#24555,#24556,#24557,#24558));
#9976=EDGE_LOOP('',(#24559,#24560,#24561,#24562));
#9977=EDGE_LOOP('',(#24563,#24564,#24565,#24566));
#9978=EDGE_LOOP('',(#24567,#24568,#24569,#24570));
#9979=EDGE_LOOP('',(#24571,#24572,#24573,#24574));
#9980=EDGE_LOOP('',(#24575,#24576,#24577,#24578));
#9981=EDGE_LOOP('',(#24579,#24580,#24581));
#9982=EDGE_LOOP('',(#24582,#24583,#24584,#24585));
#9983=EDGE_LOOP('',(#24586,#24587,#24588,#24589));
#9984=EDGE_LOOP('',(#24590,#24591,#24592,#24593));
#9985=EDGE_LOOP('',(#24594,#24595,#24596,#24597));
#9986=EDGE_LOOP('',(#24598,#24599,#24600,#24601));
#9987=EDGE_LOOP('',(#24602,#24603,#24604,#24605));
#9988=EDGE_LOOP('',(#24606,#24607,#24608,#24609));
#9989=EDGE_LOOP('',(#24610,#24611,#24612,#24613));
#9990=EDGE_LOOP('',(#24614,#24615,#24616,#24617));
#9991=EDGE_LOOP('',(#24618,#24619,#24620,#24621));
#9992=EDGE_LOOP('',(#24622,#24623,#24624,#24625));
#9993=EDGE_LOOP('',(#24626,#24627,#24628,#24629));
#9994=EDGE_LOOP('',(#24630,#24631,#24632,#24633));
#9995=EDGE_LOOP('',(#24634,#24635,#24636,#24637));
#9996=EDGE_LOOP('',(#24638,#24639,#24640,#24641));
#9997=EDGE_LOOP('',(#24642,#24643,#24644,#24645));
#9998=EDGE_LOOP('',(#24646,#24647,#24648,#24649));
#9999=EDGE_LOOP('',(#24650,#24651,#24652,#24653));
#10000=EDGE_LOOP('',(#24654,#24655,#24656,#24657));
#10001=EDGE_LOOP('',(#24658,#24659,#24660,#24661));
#10002=EDGE_LOOP('',(#24662,#24663,#24664,#24665));
#10003=EDGE_LOOP('',(#24666,#24667,#24668,#24669));
#10004=EDGE_LOOP('',(#24670,#24671,#24672,#24673));
#10005=EDGE_LOOP('',(#24674,#24675,#24676,#24677));
#10006=EDGE_LOOP('',(#24678,#24679,#24680,#24681));
#10007=EDGE_LOOP('',(#24682,#24683,#24684,#24685));
#10008=EDGE_LOOP('',(#24686,#24687,#24688,#24689));
#10009=EDGE_LOOP('',(#24690,#24691,#24692,#24693));
#10010=EDGE_LOOP('',(#24694,#24695,#24696,#24697));
#10011=EDGE_LOOP('',(#24698,#24699,#24700,#24701));
#10012=EDGE_LOOP('',(#24702,#24703,#24704,#24705));
#10013=EDGE_LOOP('',(#24706,#24707,#24708,#24709));
#10014=EDGE_LOOP('',(#24710,#24711,#24712,#24713));
#10015=EDGE_LOOP('',(#24714,#24715,#24716,#24717));
#10016=EDGE_LOOP('',(#24718,#24719,#24720,#24721));
#10017=EDGE_LOOP('',(#24722,#24723,#24724,#24725));
#10018=EDGE_LOOP('',(#24726,#24727,#24728,#24729));
#10019=EDGE_LOOP('',(#24730,#24731,#24732,#24733));
#10020=EDGE_LOOP('',(#24734,#24735,#24736,#24737));
#10021=EDGE_LOOP('',(#24738,#24739,#24740,#24741));
#10022=EDGE_LOOP('',(#24742,#24743,#24744,#24745));
#10023=EDGE_LOOP('',(#24746,#24747,#24748,#24749));
#10024=EDGE_LOOP('',(#24750,#24751,#24752,#24753));
#10025=EDGE_LOOP('',(#24754,#24755,#24756,#24757));
#10026=EDGE_LOOP('',(#24758,#24759,#24760,#24761));
#10027=EDGE_LOOP('',(#24762,#24763,#24764,#24765));
[truncated: 2,240,318 more chars]
