# Supplementary material for: De novo Powered Air-Purifying Respirator Design and Fabrication for Pandemic Response
Source: medRxiv preprint, doi:10.1101/2021.03.25.21252076, version 1 (2021-03-29)
Supplement: Supplementary Material 4 [file 252076_file05.zip › Supplementary Material 4/CAD Files/Pelican Case Design/Pelican Case PAPR Assembly.step]

ISO-10303-21;
HEADER;
/* Generated by software containing ST-Developer
 * from STEP Tools, Inc. (www.steptools.com) 
 */

FILE_DESCRIPTION(
/* description */ (''),
/* implementation_level */ '2;1');

FILE_NAME(
/* name */ 'C:/Users/ferro/Desktop/MS PAPR/Assembled MS PAPR.step',
/* time_stamp */ '2020-10-05T16:00:54-04:00',
/* author */ (''),
/* organization */ (''),
/* preprocessor_version */ 'ST-DEVELOPER v18.1',
/* originating_system */ 'Autodesk Translation Framework v9.3.0.1241',
/* authorisation */ '');

FILE_SCHEMA (('AUTOMOTIVE_DESIGN { 1 0 10303 214 3 1 1 }'));
ENDSEC;

DATA;
#10=MECHANICAL_DESIGN_GEOMETRIC_PRESENTATION_REPRESENTATION('',(#339,#340,
#341,#342,#343,#344,#345,#346,#347,#348,#349,#350,#351,#352,#353,#354,#355,
#356,#357,#358,#359,#360,#361,#362,#363,#364),#256279);
#11=ITEM_DEFINED_TRANSFORMATION($,$,#74107,#75135);
#12=ITEM_DEFINED_TRANSFORMATION($,$,#74500,#75136);
#13=ITEM_DEFINED_TRANSFORMATION($,$,#75179,#75306);
#14=ITEM_DEFINED_TRANSFORMATION($,$,#75179,#75307);
#15=ITEM_DEFINED_TRANSFORMATION($,$,#75314,#75477);
#16=ITEM_DEFINED_TRANSFORMATION($,$,#75310,#75478);
#17=ITEM_DEFINED_TRANSFORMATION($,$,#75314,#75479);
#18=ITEM_DEFINED_TRANSFORMATION($,$,#75313,#75480);
#19=ITEM_DEFINED_TRANSFORMATION($,$,#75309,#78283);
#20=ITEM_DEFINED_TRANSFORMATION($,$,#75481,#78284);
#21=ITEM_DEFINED_TRANSFORMATION($,$,#75312,#78285);
#22=ITEM_DEFINED_TRANSFORMATION($,$,#75481,#78286);
#23=ITEM_DEFINED_TRANSFORMATION($,$,#78622,#78848);
#24=ITEM_DEFINED_TRANSFORMATION($,$,#78621,#78849);
#25=ITEM_DEFINED_TRANSFORMATION($,$,#78874,#81208);
#26=ITEM_DEFINED_TRANSFORMATION($,$,#81069,#81209);
#27=ITEM_DEFINED_TRANSFORMATION($,$,#81140,#81210);
#28=ITEM_DEFINED_TRANSFORMATION($,$,#81149,#81211);
#29=ITEM_DEFINED_TRANSFORMATION($,$,#81248,#81284);
#30=ITEM_DEFINED_TRANSFORMATION($,$,#81248,#81285);
#31=ITEM_DEFINED_TRANSFORMATION($,$,#81213,#81286);
#32=ITEM_DEFINED_TRANSFORMATION($,$,#81246,#81287);
#33=ITEM_DEFINED_TRANSFORMATION($,$,#81247,#81288);
#34=ITEM_DEFINED_TRANSFORMATION($,$,#74106,#81578);
#35=ITEM_DEFINED_TRANSFORMATION($,$,#75137,#81579);
#36=ITEM_DEFINED_TRANSFORMATION($,$,#75177,#81580);
#37=ITEM_DEFINED_TRANSFORMATION($,$,#75178,#81581);
#38=ITEM_DEFINED_TRANSFORMATION($,$,#75308,#81582);
#39=ITEM_DEFINED_TRANSFORMATION($,$,#75311,#81583);
#40=ITEM_DEFINED_TRANSFORMATION($,$,#81398,#81584);
#41=ITEM_DEFINED_TRANSFORMATION($,$,#81398,#81585);
#42=ITEM_DEFINED_TRANSFORMATION($,$,#78287,#81586);
#43=ITEM_DEFINED_TRANSFORMATION($,$,#78298,#81587);
#44=ITEM_DEFINED_TRANSFORMATION($,$,#78620,#81588);
#45=ITEM_DEFINED_TRANSFORMATION($,$,#78850,#81589);
#46=ITEM_DEFINED_TRANSFORMATION($,$,#78850,#81590);
#47=ITEM_DEFINED_TRANSFORMATION($,$,#78873,#81591);
#48=ITEM_DEFINED_TRANSFORMATION($,$,#81212,#81592);
#49=ITEM_DEFINED_TRANSFORMATION($,$,#81289,#81593);
#50=ITEM_DEFINED_TRANSFORMATION($,$,#81398,#81594);
#51=ITEM_DEFINED_TRANSFORMATION($,$,#81398,#81595);
#52=ITEM_DEFINED_TRANSFORMATION($,$,#81407,#81596);
#53=(
REPRESENTATION_RELATIONSHIP($,$,#256398,#256397)
REPRESENTATION_RELATIONSHIP_WITH_TRANSFORMATION(#11)
SHAPE_REPRESENTATION_RELATIONSHIP()
);
#54=(
REPRESENTATION_RELATIONSHIP($,$,#256399,#256397)
REPRESENTATION_RELATIONSHIP_WITH_TRANSFORMATION(#12)
SHAPE_REPRESENTATION_RELATIONSHIP()
);
#55=(
REPRESENTATION_RELATIONSHIP($,$,#256403,#256401)
REPRESENTATION_RELATIONSHIP_WITH_TRANSFORMATION(#13)
SHAPE_REPRESENTATION_RELATIONSHIP()
);
#56=(
REPRESENTATION_RELATIONSHIP($,$,#256403,#256402)
REPRESENTATION_RELATIONSHIP_WITH_TRANSFORMATION(#14)
SHAPE_REPRESENTATION_RELATIONSHIP()
);
#57=(
REPRESENTATION_RELATIONSHIP($,$,#256410,#256406)
REPRESENTATION_RELATIONSHIP_WITH_TRANSFORMATION(#15)
SHAPE_REPRESENTATION_RELATIONSHIP()
);
#58=(
REPRESENTATION_RELATIONSHIP($,$,#256406,#256405)
REPRESENTATION_RELATIONSHIP_WITH_TRANSFORMATION(#16)
SHAPE_REPRESENTATION_RELATIONSHIP()
);
#59=(
REPRESENTATION_RELATIONSHIP($,$,#256410,#256409)
REPRESENTATION_RELATIONSHIP_WITH_TRANSFORMATION(#17)
SHAPE_REPRESENTATION_RELATIONSHIP()
);
#60=(
REPRESENTATION_RELATIONSHIP($,$,#256409,#256408)
REPRESENTATION_RELATIONSHIP_WITH_TRANSFORMATION(#18)
SHAPE_REPRESENTATION_RELATIONSHIP()
);
#61=(
REPRESENTATION_RELATIONSHIP($,$,#256405,#256404)
REPRESENTATION_RELATIONSHIP_WITH_TRANSFORMATION(#19)
SHAPE_REPRESENTATION_RELATIONSHIP()
);
#62=(
REPRESENTATION_RELATIONSHIP($,$,#256411,#256404)
REPRESENTATION_RELATIONSHIP_WITH_TRANSFORMATION(#20)
SHAPE_REPRESENTATION_RELATIONSHIP()
);
#63=(
REPRESENTATION_RELATIONSHIP($,$,#256408,#256407)
REPRESENTATION_RELATIONSHIP_WITH_TRANSFORMATION(#21)
SHAPE_REPRESENTATION_RELATIONSHIP()
);
#64=(
REPRESENTATION_RELATIONSHIP($,$,#256411,#256407)
REPRESENTATION_RELATIONSHIP_WITH_TRANSFORMATION(#22)
SHAPE_REPRESENTATION_RELATIONSHIP()
);
#65=(
REPRESENTATION_RELATIONSHIP($,$,#256416,#256415)
REPRESENTATION_RELATIONSHIP_WITH_TRANSFORMATION(#23)
SHAPE_REPRESENTATION_RELATIONSHIP()
);
#66=(
REPRESENTATION_RELATIONSHIP($,$,#256415,#256414)
REPRESENTATION_RELATIONSHIP_WITH_TRANSFORMATION(#24)
SHAPE_REPRESENTATION_RELATIONSHIP()
);
#67=(
REPRESENTATION_RELATIONSHIP($,$,#256419,#256418)
REPRESENTATION_RELATIONSHIP_WITH_TRANSFORMATION(#25)
SHAPE_REPRESENTATION_RELATIONSHIP()
);
#68=(
REPRESENTATION_RELATIONSHIP($,$,#256420,#256418)
REPRESENTATION_RELATIONSHIP_WITH_TRANSFORMATION(#26)
SHAPE_REPRESENTATION_RELATIONSHIP()
);
#69=(
REPRESENTATION_RELATIONSHIP($,$,#256421,#256418)
REPRESENTATION_RELATIONSHIP_WITH_TRANSFORMATION(#27)
SHAPE_REPRESENTATION_RELATIONSHIP()
);
#70=(
REPRESENTATION_RELATIONSHIP($,$,#256422,#256418)
REPRESENTATION_RELATIONSHIP_WITH_TRANSFORMATION(#28)
SHAPE_REPRESENTATION_RELATIONSHIP()
);
#71=(
REPRESENTATION_RELATIONSHIP($,$,#256427,#256425)
REPRESENTATION_RELATIONSHIP_WITH_TRANSFORMATION(#29)
SHAPE_REPRESENTATION_RELATIONSHIP()
);
#72=(
REPRESENTATION_RELATIONSHIP($,$,#256427,#256426)
REPRESENTATION_RELATIONSHIP_WITH_TRANSFORMATION(#30)
SHAPE_REPRESENTATION_RELATIONSHIP()
);
#73=(
REPRESENTATION_RELATIONSHIP($,$,#256424,#256423)
REPRESENTATION_RELATIONSHIP_WITH_TRANSFORMATION(#31)
SHAPE_REPRESENTATION_RELATIONSHIP()
);
#74=(
REPRESENTATION_RELATIONSHIP($,$,#256425,#256423)
REPRESENTATION_RELATIONSHIP_WITH_TRANSFORMATION(#32)
SHAPE_REPRESENTATION_RELATIONSHIP()
);
#75=(
REPRESENTATION_RELATIONSHIP($,$,#256426,#256423)
REPRESENTATION_RELATIONSHIP_WITH_TRANSFORMATION(#33)
SHAPE_REPRESENTATION_RELATIONSHIP()
);
#76=(
REPRESENTATION_RELATIONSHIP($,$,#256397,#256396)
REPRESENTATION_RELATIONSHIP_WITH_TRANSFORMATION(#34)
SHAPE_REPRESENTATION_RELATIONSHIP()
);
#77=(
REPRESENTATION_RELATIONSHIP($,$,#256400,#256396)
REPRESENTATION_RELATIONSHIP_WITH_TRANSFORMATION(#35)
SHAPE_REPRESENTATION_RELATIONSHIP()
);
#78=(
REPRESENTATION_RELATIONSHIP($,$,#256401,#256396)
REPRESENTATION_RELATIONSHIP_WITH_TRANSFORMATION(#36)
SHAPE_REPRESENTATION_RELATIONSHIP()
);
#79=(
REPRESENTATION_RELATIONSHIP($,$,#256402,#256396)
REPRESENTATION_RELATIONSHIP_WITH_TRANSFORMATION(#37)
SHAPE_REPRESENTATION_RELATIONSHIP()
);
#80=(
REPRESENTATION_RELATIONSHIP($,$,#256404,#256396)
REPRESENTATION_RELATIONSHIP_WITH_TRANSFORMATION(#38)
SHAPE_REPRESENTATION_RELATIONSHIP()
);
#81=(
REPRESENTATION_RELATIONSHIP($,$,#256407,#256396)
REPRESENTATION_RELATIONSHIP_WITH_TRANSFORMATION(#39)
SHAPE_REPRESENTATION_RELATIONSHIP()
);
#82=(
REPRESENTATION_RELATIONSHIP($,$,#256429,#256396)
REPRESENTATION_RELATIONSHIP_WITH_TRANSFORMATION(#40)
SHAPE_REPRESENTATION_RELATIONSHIP()
);
#83=(
REPRESENTATION_RELATIONSHIP($,$,#256429,#256396)
REPRESENTATION_RELATIONSHIP_WITH_TRANSFORMATION(#41)
SHAPE_REPRESENTATION_RELATIONSHIP()
);
#84=(
REPRESENTATION_RELATIONSHIP($,$,#256412,#256396)
REPRESENTATION_RELATIONSHIP_WITH_TRANSFORMATION(#42)
SHAPE_REPRESENTATION_RELATIONSHIP()
);
#85=(
REPRESENTATION_RELATIONSHIP($,$,#256413,#256396)
REPRESENTATION_RELATIONSHIP_WITH_TRANSFORMATION(#43)
SHAPE_REPRESENTATION_RELATIONSHIP()
);
#86=(
REPRESENTATION_RELATIONSHIP($,$,#256414,#256396)
REPRESENTATION_RELATIONSHIP_WITH_TRANSFORMATION(#44)
SHAPE_REPRESENTATION_RELATIONSHIP()
);
#87=(
REPRESENTATION_RELATIONSHIP($,$,#256417,#256396)
REPRESENTATION_RELATIONSHIP_WITH_TRANSFORMATION(#45)
SHAPE_REPRESENTATION_RELATIONSHIP()
);
#88=(
REPRESENTATION_RELATIONSHIP($,$,#256417,#256396)
REPRESENTATION_RELATIONSHIP_WITH_TRANSFORMATION(#46)
SHAPE_REPRESENTATION_RELATIONSHIP()
);
#89=(
REPRESENTATION_RELATIONSHIP($,$,#256418,#256396)
REPRESENTATION_RELATIONSHIP_WITH_TRANSFORMATION(#47)
SHAPE_REPRESENTATION_RELATIONSHIP()
);
#90=(
REPRESENTATION_RELATIONSHIP($,$,#256423,#256396)
REPRESENTATION_RELATIONSHIP_WITH_TRANSFORMATION(#48)
SHAPE_REPRESENTATION_RELATIONSHIP()
);
#91=(
REPRESENTATION_RELATIONSHIP($,$,#256428,#256396)
REPRESENTATION_RELATIONSHIP_WITH_TRANSFORMATION(#49)
SHAPE_REPRESENTATION_RELATIONSHIP()
);
#92=(
REPRESENTATION_RELATIONSHIP($,$,#256429,#256396)
REPRESENTATION_RELATIONSHIP_WITH_TRANSFORMATION(#50)
SHAPE_REPRESENTATION_RELATIONSHIP()
);
#93=(
REPRESENTATION_RELATIONSHIP($,$,#256429,#256396)
REPRESENTATION_RELATIONSHIP_WITH_TRANSFORMATION(#51)
SHAPE_REPRESENTATION_RELATIONSHIP()
);
#94=(
REPRESENTATION_RELATIONSHIP($,$,#256430,#256396)
REPRESENTATION_RELATIONSHIP_WITH_TRANSFORMATION(#52)
SHAPE_REPRESENTATION_RELATIONSHIP()
);
#95=CONTEXT_DEPENDENT_SHAPE_REPRESENTATION(#53,#256323);
#96=CONTEXT_DEPENDENT_SHAPE_REPRESENTATION(#54,#256324);
#97=CONTEXT_DEPENDENT_SHAPE_REPRESENTATION(#55,#256329);
#98=CONTEXT_DEPENDENT_SHAPE_REPRESENTATION(#56,#256330);
#99=CONTEXT_DEPENDENT_SHAPE_REPRESENTATION(#57,#256338);
#100=CONTEXT_DEPENDENT_SHAPE_REPRESENTATION(#58,#256339);
#101=CONTEXT_DEPENDENT_SHAPE_REPRESENTATION(#59,#256340);
#102=CONTEXT_DEPENDENT_SHAPE_REPRESENTATION(#60,#256341);
#103=CONTEXT_DEPENDENT_SHAPE_REPRESENTATION(#61,#256343);
#104=CONTEXT_DEPENDENT_SHAPE_REPRESENTATION(#62,#256344);
#105=CONTEXT_DEPENDENT_SHAPE_REPRESENTATION(#63,#256345);
#106=CONTEXT_DEPENDENT_SHAPE_REPRESENTATION(#64,#256346);
#107=CONTEXT_DEPENDENT_SHAPE_REPRESENTATION(#65,#256352);
#108=CONTEXT_DEPENDENT_SHAPE_REPRESENTATION(#66,#256353);
#109=CONTEXT_DEPENDENT_SHAPE_REPRESENTATION(#67,#256360);
#110=CONTEXT_DEPENDENT_SHAPE_REPRESENTATION(#68,#256361);
#111=CONTEXT_DEPENDENT_SHAPE_REPRESENTATION(#69,#256362);
#112=CONTEXT_DEPENDENT_SHAPE_REPRESENTATION(#70,#256363);
#113=CONTEXT_DEPENDENT_SHAPE_REPRESENTATION(#71,#256369);
#114=CONTEXT_DEPENDENT_SHAPE_REPRESENTATION(#72,#256370);
#115=CONTEXT_DEPENDENT_SHAPE_REPRESENTATION(#73,#256371);
#116=CONTEXT_DEPENDENT_SHAPE_REPRESENTATION(#74,#256372);
#117=CONTEXT_DEPENDENT_SHAPE_REPRESENTATION(#75,#256373);
#118=CONTEXT_DEPENDENT_SHAPE_REPRESENTATION(#76,#256377);
#119=CONTEXT_DEPENDENT_SHAPE_REPRESENTATION(#77,#256378);
#120=CONTEXT_DEPENDENT_SHAPE_REPRESENTATION(#78,#256379);
#121=CONTEXT_DEPENDENT_SHAPE_REPRESENTATION(#79,#256380);
#122=CONTEXT_DEPENDENT_SHAPE_REPRESENTATION(#80,#256381);
#123=CONTEXT_DEPENDENT_SHAPE_REPRESENTATION(#81,#256382);
#124=CONTEXT_DEPENDENT_SHAPE_REPRESENTATION(#82,#256383);
#125=CONTEXT_DEPENDENT_SHAPE_REPRESENTATION(#83,#256384);
#126=CONTEXT_DEPENDENT_SHAPE_REPRESENTATION(#84,#256385);
#127=CONTEXT_DEPENDENT_SHAPE_REPRESENTATION(#85,#256386);
#128=CONTEXT_DEPENDENT_SHAPE_REPRESENTATION(#86,#256387);
#129=CONTEXT_DEPENDENT_SHAPE_REPRESENTATION(#87,#256388);
#130=CONTEXT_DEPENDENT_SHAPE_REPRESENTATION(#88,#256389);
#131=CONTEXT_DEPENDENT_SHAPE_REPRESENTATION(#89,#256390);
#132=CONTEXT_DEPENDENT_SHAPE_REPRESENTATION(#90,#256391);
#133=CONTEXT_DEPENDENT_SHAPE_REPRESENTATION(#91,#256392);
#134=CONTEXT_DEPENDENT_SHAPE_REPRESENTATION(#92,#256393);
#135=CONTEXT_DEPENDENT_SHAPE_REPRESENTATION(#93,#256394);
#136=CONTEXT_DEPENDENT_SHAPE_REPRESENTATION(#94,#256395);
#137=NEXT_ASSEMBLY_USAGE_OCCURRENCE('Pelican Vault V100 bottom v3:1',
'Pelican Vault V100 bottom v3:1','Pelican Vault V100 bottom v3:1',#256433,
#256434,'Pelican Vault V100 bottom v3:1');
#138=NEXT_ASSEMBLY_USAGE_OCCURRENCE('pelican Vault V100 Top v2:1',
'pelican Vault V100 Top v2:1','pelican Vault V100 Top v2:1',#256433,#256435,
'pelican Vault V100 Top v2:1');
#139=NEXT_ASSEMBLY_USAGE_OCCURRENCE('molded strap loop:1',
'molded strap loop:1','molded strap loop:1',#256437,#256439,
'molded strap loop:1');
#140=NEXT_ASSEMBLY_USAGE_OCCURRENCE('molded strap loop:1',
'molded strap loop:1','molded strap loop:1',#256438,#256439,
'molded strap loop:1');
#141=NEXT_ASSEMBLY_USAGE_OCCURRENCE('1271-13987 - Rev01:1',
'1271-13987 - Rev01:1','1271-13987 - Rev01:1',#256442,#256446,
'1271-13987 - Rev01:1');
#142=NEXT_ASSEMBLY_USAGE_OCCURRENCE('KFilterPanFabThing v3:1',
'KFilterPanFabThing v3:1','KFilterPanFabThing v3:1',#256441,#256442,
'KFilterPanFabThing v3:1');
#143=NEXT_ASSEMBLY_USAGE_OCCURRENCE('1271-13987 - Rev01:1',
'1271-13987 - Rev01:1','1271-13987 - Rev01:1',#256445,#256446,
'1271-13987 - Rev01:1');
#144=NEXT_ASSEMBLY_USAGE_OCCURRENCE('KFilterPanFabThing v3:1',
'KFilterPanFabThing v3:1','KFilterPanFabThing v3:1',#256444,#256445,
'KFilterPanFabThing v3:1');
#145=NEXT_ASSEMBLY_USAGE_OCCURRENCE('Housing v2:1','Housing v2:1',
'Housing v2:1',#256440,#256441,'Housing v2:1');
#146=NEXT_ASSEMBLY_USAGE_OCCURRENCE('Lid v2:1','Lid v2:1','Lid v2:1',#256440,
#256447,'Lid v2:1');
#147=NEXT_ASSEMBLY_USAGE_OCCURRENCE('Housing v2:1','Housing v2:1',
'Housing v2:1',#256443,#256444,'Housing v2:1');
#148=NEXT_ASSEMBLY_USAGE_OCCURRENCE('Lid v2:1','Lid v2:1','Lid v2:1',#256443,
#256447,'Lid v2:1');
#149=NEXT_ASSEMBLY_USAGE_OCCURRENCE('wide:1','wide:1','wide:1',#256451,
#256452,'wide:1');
#150=NEXT_ASSEMBLY_USAGE_OCCURRENCE('New Switch Guards:1',
'New Switch Guards:1','New Switch Guards:1',#256450,#256451,
'New Switch Guards:1');
#151=NEXT_ASSEMBLY_USAGE_OCCURRENCE('Blower model v7:1',
'Blower model v7:1','Blower model v7:1',#256454,#256455,
'Blower model v7:1');
#152=NEXT_ASSEMBLY_USAGE_OCCURRENCE('Blower Adapter v1:1',
'Blower Adapter v1:1','Blower Adapter v1:1',#256454,#256456,
'Blower Adapter v1:1');
#153=NEXT_ASSEMBLY_USAGE_OCCURRENCE('3/4 inch silicone hose v2:1',
'3/4 inch silicone hose v2:1','3/4 inch silicone hose v2:1',#256454,#256457,
'3/4 inch silicone hose v2:1');
#154=NEXT_ASSEMBLY_USAGE_OCCURRENCE('Venturi v5:1','Venturi v5:1',
'Venturi v5:1',#256454,#256458,'Venturi v5:1');
#155=NEXT_ASSEMBLY_USAGE_OCCURRENCE('20 mm hose adapter:1',
'20 mm hose adapter:1','20 mm hose adapter:1',#256461,#256463,
'20 mm hose adapter:1');
#156=NEXT_ASSEMBLY_USAGE_OCCURRENCE('20 mm hose adapter:1',
'20 mm hose adapter:1','20 mm hose adapter:1',#256462,#256463,
'20 mm hose adapter:1');
#157=NEXT_ASSEMBLY_USAGE_OCCURRENCE('flexaust 1.25 inch hose v1:1',
'flexaust 1.25 inch hose v1:1','flexaust 1.25 inch hose v1:1',#256459,#256460,
'flexaust 1.25 inch hose v1:1');
#158=NEXT_ASSEMBLY_USAGE_OCCURRENCE(
'flexaust 1.25 inch hose adapter v2:1',
'flexaust 1.25 inch hose adapter v2:1',
'flexaust 1.25 inch hose adapter v2:1',#256459,#256461,
'flexaust 1.25 inch hose adapter v2:1');
#159=NEXT_ASSEMBLY_USAGE_OCCURRENCE(
'flexaust 1.25 inch hose adapter v2:2',
'flexaust 1.25 inch hose adapter v2:2',
'flexaust 1.25 inch hose adapter v2:2',#256459,#256462,
'flexaust 1.25 inch hose adapter v2:2');
#160=NEXT_ASSEMBLY_USAGE_OCCURRENCE('Pelican Vault V100 v3:1',
'Pelican Vault V100 v3:1','Pelican Vault V100 v3:1',#256432,#256433,
'Pelican Vault V100 v3:1');
#161=NEXT_ASSEMBLY_USAGE_OCCURRENCE('Hose Insert v5 200926 v2:1',
'Hose Insert v5 200926 v2:1','Hose Insert v5 200926 v2:1',#256432,#256436,
'Hose Insert v5 200926 v2:1');
#162=NEXT_ASSEMBLY_USAGE_OCCURRENCE('Enclosure strap loop v3:1',
'Enclosure strap loop v3:1','Enclosure strap loop v3:1',#256432,#256437,
'Enclosure strap loop v3:1');
#163=NEXT_ASSEMBLY_USAGE_OCCURRENCE('Enclosure strap loop v3:2',
'Enclosure strap loop v3:2','Enclosure strap loop v3:2',#256432,#256438,
'Enclosure strap loop v3:2');
#164=NEXT_ASSEMBLY_USAGE_OCCURRENCE('Custom Filter Assembly v1:1',
'Custom Filter Assembly v1:1','Custom Filter Assembly v1:1',#256432,#256440,
'Custom Filter Assembly v1:1');
#165=NEXT_ASSEMBLY_USAGE_OCCURRENCE('Custom Filter Assembly v1:2',
'Custom Filter Assembly v1:2','Custom Filter Assembly v1:2',#256432,#256443,
'Custom Filter Assembly v1:2');
#166=NEXT_ASSEMBLY_USAGE_OCCURRENCE('Filter Gasket v1:1',
'Filter Gasket v1:1','Filter Gasket v1:1',#256432,#256465,
'Filter Gasket v1:1');
#167=NEXT_ASSEMBLY_USAGE_OCCURRENCE('Filter Gasket v1:2',
'Filter Gasket v1:2','Filter Gasket v1:2',#256432,#256465,
'Filter Gasket v1:2');
#168=NEXT_ASSEMBLY_USAGE_OCCURRENCE('Blower Mount- Pelican Case v2:1',
'Blower Mount- Pelican Case v2:1','Blower Mount- Pelican Case v2:1',#256432,
#256448,'Blower Mount- Pelican Case v2:1');
#169=NEXT_ASSEMBLY_USAGE_OCCURRENCE('switch body v1:1',
'switch body v1:1','switch body v1:1',#256432,#256449,
'switch body v1:1');
#170=NEXT_ASSEMBLY_USAGE_OCCURRENCE('Switch Guard v2:1',
'Switch Guard v2:1','Switch Guard v2:1',#256432,#256450,
'Switch Guard v2:1');
#171=NEXT_ASSEMBLY_USAGE_OCCURRENCE('Filter Insert v3:1',
'Filter Insert v3:1','Filter Insert v3:1',#256432,#256453,
'Filter Insert v3:1');
#172=NEXT_ASSEMBLY_USAGE_OCCURRENCE('Filter Insert v3:2',
'Filter Insert v3:2','Filter Insert v3:2',#256432,#256453,
'Filter Insert v3:2');
#173=NEXT_ASSEMBLY_USAGE_OCCURRENCE('Blower Assembly v3:1',
'Blower Assembly v3:1','Blower Assembly v3:1',#256432,#256454,
'Blower Assembly v3:1');
#174=NEXT_ASSEMBLY_USAGE_OCCURRENCE('Hose Assembly v5:1',
'Hose Assembly v5:1','Hose Assembly v5:1',#256432,#256459,
'Hose Assembly v5:1');
#175=NEXT_ASSEMBLY_USAGE_OCCURRENCE(
'Hunter VHA IE coupler with NATO thread v6 200926 v2:1',
'Hunter VHA IE coupler with NATO thread v6 200926 v2:1',
'Hunter VHA IE coupler with NATO thread v6 200926 v2:1',#256432,#256464,
'Hunter VHA IE coupler with NATO thread v6 200926 v2:1');
#176=NEXT_ASSEMBLY_USAGE_OCCURRENCE('Filter Gasket v1:3',
'Filter Gasket v1:3','Filter Gasket v1:3',#256432,#256465,
'Filter Gasket v1:3');
#177=NEXT_ASSEMBLY_USAGE_OCCURRENCE('Filter Gasket v1:4',
'Filter Gasket v1:4','Filter Gasket v1:4',#256432,#256465,
'Filter Gasket v1:4');
#178=NEXT_ASSEMBLY_USAGE_OCCURRENCE('Final Locking Ring v2:1',
'Final Locking Ring v2:1','Final Locking Ring v2:1',#256432,#256466,
'Final Locking Ring v2:1');
#179=(
BOUNDED_CURVE()
B_SPLINE_CURVE(3,(#108745,#108746,#108747,#108748,#108749,#108750,#108751,
#108752,#108753,#108754),.UNSPECIFIED.,.F.,.F.)
B_SPLINE_CURVE_WITH_KNOTS((4,2,2,2,4),(-6.92083904621925E-15,0.000343828344704275,
0.00068765668940855,0.00103148503411282,0.00137531337881732),
 .UNSPECIFIED.)
CURVE()
GEOMETRIC_REPRESENTATION_ITEM()
RATIONAL_B_SPLINE_CURVE((0.999999999999999,1.,1.,1.,1.,1.,1.,1.,1.,0.999999999999999))
REPRESENTATION_ITEM('')
);
#180=(
BOUNDED_CURVE()
B_SPLINE_CURVE(3,(#108756,#108757,#108758,#108759),.UNSPECIFIED.,.F.,.F.)
B_SPLINE_CURVE_WITH_KNOTS((4,4),(-4.5102810375397E-17,0.0292885711597344),
 .UNSPECIFIED.)
CURVE()
GEOMETRIC_REPRESENTATION_ITEM()
RATIONAL_B_SPLINE_CURVE((1.,1.,1.,1.))
REPRESENTATION_ITEM('')
);
#181=(
BOUNDED_CURVE()
B_SPLINE_CURVE(3,(#108761,#108762,#108763,#108764),.UNSPECIFIED.,.F.,.F.)
B_SPLINE_CURVE_WITH_KNOTS((4,4),(-1.38777878078145E-17,0.00472726817237507),
 .UNSPECIFIED.)
CURVE()
GEOMETRIC_REPRESENTATION_ITEM()
RATIONAL_B_SPLINE_CURVE((1.,1.,1.,1.))
REPRESENTATION_ITEM('')
);
#182=(
BOUNDED_CURVE()
B_SPLINE_CURVE(3,(#108770,#108771,#108772,#108773),.UNSPECIFIED.,.F.,.F.)
B_SPLINE_CURVE_WITH_KNOTS((4,4),(-1.38777878078145E-17,0.00472726817237507),
 .UNSPECIFIED.)
CURVE()
GEOMETRIC_REPRESENTATION_ITEM()
RATIONAL_B_SPLINE_CURVE((1.,1.,1.,1.))
REPRESENTATION_ITEM('')
);
#183=(
BOUNDED_CURVE()
B_SPLINE_CURVE(3,(#108775,#108776,#108777,#108778),.UNSPECIFIED.,.F.,.F.)
B_SPLINE_CURVE_WITH_KNOTS((4,4),(-4.5102810375397E-17,0.0292885711597344),
 .UNSPECIFIED.)
CURVE()
GEOMETRIC_REPRESENTATION_ITEM()
RATIONAL_B_SPLINE_CURVE((1.,1.,1.,1.))
REPRESENTATION_ITEM('')
);
#184=(
BOUNDED_CURVE()
B_SPLINE_CURVE(3,(#108780,#108781,#108782,#108783,#108784,#108785,#108786,
#108787,#108788,#108789),.UNSPECIFIED.,.F.,.F.)
B_SPLINE_CURVE_WITH_KNOTS((4,2,2,2,4),(-7.01515761267705E-15,0.00034382834470427,
0.000687656689408541,0.00103148503411281,0.00137531337881753),
 .UNSPECIFIED.)
CURVE()
GEOMETRIC_REPRESENTATION_ITEM()
RATIONAL_B_SPLINE_CURVE((1.,1.,1.,1.,1.,1.,1.,1.,1.,1.))
REPRESENTATION_ITEM('')
);
#185=(
BOUNDED_CURVE()
B_SPLINE_CURVE(3,(#108791,#108792,#108793,#108794),.UNSPECIFIED.,.F.,.F.)
B_SPLINE_CURVE_WITH_KNOTS((4,4),(-3.94649590784724E-17,0.000835249893958165),
 .UNSPECIFIED.)
CURVE()
GEOMETRIC_REPRESENTATION_ITEM()
RATIONAL_B_SPLINE_CURVE((1.,1.,1.,1.))
REPRESENTATION_ITEM('')
);
#186=(
BOUNDED_CURVE()
B_SPLINE_CURVE(2,(#108850,#108851,#108852),.UNSPECIFIED.,.F.,.F.)
B_SPLINE_CURVE_WITH_KNOTS((3,3),(-1.,0.),.UNSPECIFIED.)
CURVE()
GEOMETRIC_REPRESENTATION_ITEM()
RATIONAL_B_SPLINE_CURVE((1.,0.889854963301626,1.))
REPRESENTATION_ITEM('')
);
#187=(
BOUNDED_CURVE()
B_SPLINE_CURVE(3,(#109051,#109052,#109053,#109054),.UNSPECIFIED.,.F.,.F.)
B_SPLINE_CURVE_WITH_KNOTS((4,4),(3.11553318736974,3.14159268143595),
 .UNSPECIFIED.)
CURVE()
GEOMETRIC_REPRESENTATION_ITEM()
RATIONAL_B_SPLINE_CURVE((1.,0.999943409364728,0.999943409364728,1.))
REPRESENTATION_ITEM('')
);
#188=(
BOUNDED_CURVE()
B_SPLINE_CURVE(3,(#109246,#109247,#109248,#109249),.UNSPECIFIED.,.F.,.F.)
B_SPLINE_CURVE_WITH_KNOTS((4,4),(3.11553318736974,3.14159268143595),
 .UNSPECIFIED.)
CURVE()
GEOMETRIC_REPRESENTATION_ITEM()
RATIONAL_B_SPLINE_CURVE((1.,0.999943409364728,0.999943409364728,1.))
REPRESENTATION_ITEM('')
);
#189=(
BOUNDED_CURVE()
B_SPLINE_CURVE(2,(#163953,#163954,#163955),.UNSPECIFIED.,.F.,.F.)
B_SPLINE_CURVE_WITH_KNOTS((3,3),(-3.11106105723483,-0.218359597482129),
 .UNSPECIFIED.)
CURVE()
GEOMETRIC_REPRESENTATION_ITEM()
RATIONAL_B_SPLINE_CURVE((1.06385224840213,1.16821910472625,1.02329941291568))
REPRESENTATION_ITEM('')
);
#190=(
BOUNDED_CURVE()
B_SPLINE_CURVE(2,(#163957,#163958,#163959),.UNSPECIFIED.,.F.,.F.)
B_SPLINE_CURVE_WITH_KNOTS((3,3),(-3.58163296347622,-0.688931503516999),
 .UNSPECIFIED.)
CURVE()
GEOMETRIC_REPRESENTATION_ITEM()
RATIONAL_B_SPLINE_CURVE((1.02329941252285,1.16821910118128,1.06385224695917))
REPRESENTATION_ITEM('')
);
#191=(
BOUNDED_CURVE()
B_SPLINE_CURVE(2,(#163972,#163973,#163974),.UNSPECIFIED.,.F.,.F.)
B_SPLINE_CURVE_WITH_KNOTS((3,3),(0.218359597316097,3.1110610570434),
 .UNSPECIFIED.)
CURVE()
GEOMETRIC_REPRESENTATION_ITEM()
RATIONAL_B_SPLINE_CURVE((1.02329941298084,1.16821910531322,1.06385224864011))
REPRESENTATION_ITEM('')
);
#192=(
BOUNDED_CURVE()
B_SPLINE_CURVE(2,(#163977,#163978,#163979),.UNSPECIFIED.,.F.,.F.)
B_SPLINE_CURVE_WITH_KNOTS((3,3),(-3.11106105941418,-0.218359599287818),
 .UNSPECIFIED.)
CURVE()
GEOMETRIC_REPRESENTATION_ITEM()
RATIONAL_B_SPLINE_CURVE((1.06385224583216,1.16821909841399,1.02329941221622))
REPRESENTATION_ITEM('')
);
#193=(
BOUNDED_CURVE()
B_SPLINE_CURVE(2,(#163992,#163993,#163994),.UNSPECIFIED.,.F.,.F.)
B_SPLINE_CURVE_WITH_KNOTS((3,3),(0.218359597956227,3.11106105780993),
 .UNSPECIFIED.)
CURVE()
GEOMETRIC_REPRESENTATION_ITEM()
RATIONAL_B_SPLINE_CURVE((1.02329941273227,1.16821910307077,1.0638522477278))
REPRESENTATION_ITEM('')
);
#194=(
BOUNDED_CURVE()
B_SPLINE_CURVE(2,(#163997,#163998,#163999),.UNSPECIFIED.,.F.,.F.)
B_SPLINE_CURVE_WITH_KNOTS((3,3),(-3.11106105788901,-0.218359598028193),
 .UNSPECIFIED.)
CURVE()
GEOMETRIC_REPRESENTATION_ITEM()
RATIONAL_B_SPLINE_CURVE((1.06385224762454,1.16821910281511,1.02329941270388))
REPRESENTATION_ITEM('')
);
#195=(
BOUNDED_CURVE()
B_SPLINE_CURVE(2,(#164012,#164013,#164014),.UNSPECIFIED.,.F.,.F.)
B_SPLINE_CURVE_WITH_KNOTS((3,3),(0.21835959746624,3.11106105723089),
 .UNSPECIFIED.)
CURVE()
GEOMETRIC_REPRESENTATION_ITEM()
RATIONAL_B_SPLINE_CURVE((1.02329941292307,1.16821910479149,1.06385224842703))
REPRESENTATION_ITEM('')
);
#196=(
BOUNDED_CURVE()
B_SPLINE_CURVE(2,(#164017,#164018,#164019),.UNSPECIFIED.,.F.,.F.)
B_SPLINE_CURVE_WITH_KNOTS((3,3),(-3.11106106005376,-0.218359599827914),
 .UNSPECIFIED.)
CURVE()
GEOMETRIC_REPRESENTATION_ITEM()
RATIONAL_B_SPLINE_CURVE((1.06385224506195,1.16821909651899,1.02329941200613))
REPRESENTATION_ITEM('')
);
#197=(
BOUNDED_CURVE()
B_SPLINE_CURVE(2,(#165088,#165089,#165090),.UNSPECIFIED.,.F.,.F.)
B_SPLINE_CURVE_WITH_KNOTS((3,3),(-3.11106105799556,-0.218359598108631),
 .UNSPECIFIED.)
CURVE()
GEOMETRIC_REPRESENTATION_ITEM()
RATIONAL_B_SPLINE_CURVE((1.06385224751145,1.16821910253989,1.02329941267348))
REPRESENTATION_ITEM('')
);
#198=(
BOUNDED_CURVE()
B_SPLINE_CURVE(2,(#165091,#165092,#165093),.UNSPECIFIED.,.F.,.F.)
B_SPLINE_CURVE_WITH_KNOTS((3,3),(-3.5816329647953,-0.688931505095315),
 .UNSPECIFIED.)
CURVE()
GEOMETRIC_REPRESENTATION_ITEM()
RATIONAL_B_SPLINE_CURVE((1.02329941303487,1.16821910580087,1.0638522488385))
REPRESENTATION_ITEM('')
);
#199=(
BOUNDED_CURVE()
B_SPLINE_CURVE(2,(#165095,#165096,#165097),.UNSPECIFIED.,.F.,.F.)
B_SPLINE_CURVE_WITH_KNOTS((3,3),(-3.11106105859755,-0.218359598621799),
 .UNSPECIFIED.)
CURVE()
GEOMETRIC_REPRESENTATION_ITEM()
RATIONAL_B_SPLINE_CURVE((1.06385224677847,1.16821910073493,1.02329941247329))
REPRESENTATION_ITEM('')
);
#200=(
BOUNDED_CURVE()
B_SPLINE_CURVE(2,(#165098,#165099,#165100),.UNSPECIFIED.,.F.,.F.)
B_SPLINE_CURVE_WITH_KNOTS((3,3),(-3.58163296316924,-0.688931503145578),
 .UNSPECIFIED.)
CURVE()
GEOMETRIC_REPRESENTATION_ITEM()
RATIONAL_B_SPLINE_CURVE((1.02329941240395,1.16821910010835,1.06385224652225))
REPRESENTATION_ITEM('')
);
#201=(
BOUNDED_CURVE()
B_SPLINE_CURVE(2,(#165102,#165103,#165104),.UNSPECIFIED.,.F.,.F.)
B_SPLINE_CURVE_WITH_KNOTS((3,3),(-3.1110610588263,-0.218359598802743),
 .UNSPECIFIED.)
CURVE()
GEOMETRIC_REPRESENTATION_ITEM()
RATIONAL_B_SPLINE_CURVE((1.06385224652217,1.16821910010812,1.02329941240392))
REPRESENTATION_ITEM('')
);
#202=(
BOUNDED_CURVE()
B_SPLINE_CURVE(2,(#165105,#165106,#165107),.UNSPECIFIED.,.F.,.F.)
B_SPLINE_CURVE_WITH_KNOTS((3,3),(-3.58163296478612,-0.688931505084634),
 .UNSPECIFIED.)
CURVE()
GEOMETRIC_REPRESENTATION_ITEM()
RATIONAL_B_SPLINE_CURVE((1.0232994130314,1.16821910576939,1.06385224882571))
REPRESENTATION_ITEM('')
);
#203=(
BOUNDED_CURVE()
B_SPLINE_CURVE(2,(#165109,#165110,#165111),.UNSPECIFIED.,.F.,.F.)
B_SPLINE_CURVE_WITH_KNOTS((3,3),(-3.11106105623257,-0.218359596640907),
 .UNSPECIFIED.)
CURVE()
GEOMETRIC_REPRESENTATION_ITEM()
RATIONAL_B_SPLINE_CURVE((1.06385224960137,1.16821910767527,1.0232994132426))
REPRESENTATION_ITEM('')
);
#204=(
BOUNDED_CURVE()
B_SPLINE_CURVE(2,(#165112,#165113,#165114),.UNSPECIFIED.,.F.,.F.)
B_SPLINE_CURVE_WITH_KNOTS((3,3),(-3.58163296291431,-0.688931502843934),
 .UNSPECIFIED.)
CURVE()
GEOMETRIC_REPRESENTATION_ITEM()
RATIONAL_B_SPLINE_CURVE((1.02329941230458,1.16821909921192,1.06385224615797))
REPRESENTATION_ITEM('')
);
#205=(
BOUNDED_CURVE()
B_SPLINE_CURVE(2,(#176282,#176283,#176284),.UNSPECIFIED.,.F.,.F.)
B_SPLINE_CURVE_WITH_KNOTS((3,3),(0.261434058099408,0.282079258530747),
 .UNSPECIFIED.)
CURVE()
GEOMETRIC_REPRESENTATION_ITEM()
RATIONAL_B_SPLINE_CURVE((1.06077878080512,1.06276030610457,1.06467576650359))
REPRESENTATION_ITEM('')
);
#206=(
BOUNDED_CURVE()
B_SPLINE_CURVE(2,(#177167,#177168,#177169,#177170,#177171,#177172,#177173,
#177174,#177175,#177176,#177177,#177178,#177179,#177180,#177181,#177182,
#177183),.UNSPECIFIED.,.F.,.F.)
B_SPLINE_CURVE_WITH_KNOTS((3,2,2,2,2,2,2,2,3),(0.158044463131744,0.1640625,
0.171875,0.1796875,0.1875,0.1953125,0.203125,0.2109375,0.216955536868256),
 .UNSPECIFIED.)
CURVE()
GEOMETRIC_REPRESENTATION_ITEM()
RATIONAL_B_SPLINE_CURVE((0.973063524757819,0.941363740188675,1.,0.923879532511287,
1.,0.923879532511287,1.,0.923879532511287,1.,0.923879532511287,1.,0.923879532511287,
1.,0.923879532511287,1.,0.941363740188675,0.973063524757818))
REPRESENTATION_ITEM('')
);
#207=(
BOUNDED_CURVE()
B_SPLINE_CURVE(2,(#177186,#177187,#177188,#177189,#177190,#177191,#177192,
#177193,#177194,#177195,#177196,#177197,#177198,#177199,#177200,#177201,
#177202),.UNSPECIFIED.,.F.,.F.)
B_SPLINE_CURVE_WITH_KNOTS((3,2,2,2,2,2,2,2,3),(0.158044463131744,0.1640625,
0.171875,0.1796875,0.1875,0.1953125,0.203125,0.2109375,0.216955536868256),
 .UNSPECIFIED.)
CURVE()
GEOMETRIC_REPRESENTATION_ITEM()
RATIONAL_B_SPLINE_CURVE((0.973063524757819,0.941363740188675,1.,0.923879532511287,
1.,0.923879532511287,1.,0.923879532511287,1.,0.923879532511287,1.,0.923879532511287,
1.,0.923879532511287,1.,0.941363740188675,0.973063524757818))
REPRESENTATION_ITEM('')
);
#208=(
BOUNDED_CURVE()
B_SPLINE_CURVE(2,(#177208,#177209,#177210,#177211,#177212,#177213,#177214,
#177215,#177216,#177217,#177218,#177219,#177220,#177221,#177222,#177223,
#177224),.UNSPECIFIED.,.F.,.F.)
B_SPLINE_CURVE_WITH_KNOTS((3,2,2,2,2,2,2,2,3),(0.220544463131744,0.2265625,
0.234375,0.2421875,0.25,0.2578125,0.265625,0.2734375,0.279455536868256),
 .UNSPECIFIED.)
CURVE()
GEOMETRIC_REPRESENTATION_ITEM()
RATIONAL_B_SPLINE_CURVE((0.973063524757819,0.941363740188675,1.,0.923879532511287,
1.,0.923879532511287,1.,0.923879532511287,1.,0.923879532511287,1.,0.923879532511287,
1.,0.923879532511287,1.,0.941363740188675,0.973063524757818))
REPRESENTATION_ITEM('')
);
#209=(
BOUNDED_CURVE()
B_SPLINE_CURVE(2,(#177227,#177228,#177229,#177230,#177231,#177232,#177233,
#177234,#177235,#177236,#177237,#177238,#177239,#177240,#177241,#177242,
#177243),.UNSPECIFIED.,.F.,.F.)
B_SPLINE_CURVE_WITH_KNOTS((3,2,2,2,2,2,2,2,3),(0.220544463131744,0.2265625,
0.234375,0.2421875,0.25,0.2578125,0.265625,0.2734375,0.279455536868256),
 .UNSPECIFIED.)
CURVE()
GEOMETRIC_REPRESENTATION_ITEM()
RATIONAL_B_SPLINE_CURVE((0.973063524757819,0.941363740188675,1.,0.923879532511287,
1.,0.923879532511287,1.,0.923879532511287,1.,0.923879532511287,1.,0.923879532511287,
1.,0.923879532511287,1.,0.941363740188675,0.973063524757818))
REPRESENTATION_ITEM('')
);
#210=(
BOUNDED_CURVE()
B_SPLINE_CURVE(2,(#177249,#177250,#177251,#177252,#177253,#177254,#177255,
#177256,#177257,#177258,#177259,#177260,#177261,#177262,#177263,#177264,
#177265),.UNSPECIFIED.,.F.,.F.)
B_SPLINE_CURVE_WITH_KNOTS((3,2,2,2,2,2,2,2,3),(0.283044463131744,0.2890625,
0.296875,0.3046875,0.3125,0.3203125,0.328125,0.3359375,0.341955536868256),
 .UNSPECIFIED.)
CURVE()
GEOMETRIC_REPRESENTATION_ITEM()
RATIONAL_B_SPLINE_CURVE((0.973063524757819,0.941363740188675,1.,0.923879532511287,
1.,0.923879532511287,1.,0.923879532511287,1.,0.923879532511287,1.,0.923879532511287,
1.,0.923879532511287,1.,0.941363740188675,0.973063524757818))
REPRESENTATION_ITEM('')
);
#211=(
BOUNDED_CURVE()
B_SPLINE_CURVE(2,(#177268,#177269,#177270,#177271,#177272,#177273,#177274,
#177275,#177276,#177277,#177278,#177279,#177280,#177281,#177282,#177283,
#177284),.UNSPECIFIED.,.F.,.F.)
B_SPLINE_CURVE_WITH_KNOTS((3,2,2,2,2,2,2,2,3),(0.283044463131744,0.2890625,
0.296875,0.3046875,0.3125,0.3203125,0.328125,0.3359375,0.341955536868256),
 .UNSPECIFIED.)
CURVE()
GEOMETRIC_REPRESENTATION_ITEM()
RATIONAL_B_SPLINE_CURVE((0.973063524757819,0.941363740188675,1.,0.923879532511287,
1.,0.923879532511287,1.,0.923879532511287,1.,0.923879532511287,1.,0.923879532511287,
1.,0.923879532511287,1.,0.941363740188675,0.973063524757818))
REPRESENTATION_ITEM('')
);
#212=(
BOUNDED_CURVE()
B_SPLINE_CURVE(2,(#177290,#177291,#177292,#177293,#177294,#177295,#177296,
#177297,#177298,#177299,#177300,#177301,#177302,#177303,#177304,#177305,
#177306),.UNSPECIFIED.,.F.,.F.)
B_SPLINE_CURVE_WITH_KNOTS((3,2,2,2,2,2,2,2,3),(0.345544463131744,0.3515625,
0.359375,0.3671875,0.375,0.3828125,0.390625,0.3984375,0.404455536868256),
 .UNSPECIFIED.)
CURVE()
GEOMETRIC_REPRESENTATION_ITEM()
RATIONAL_B_SPLINE_CURVE((0.973063524757819,0.941363740188675,1.,0.923879532511287,
1.,0.923879532511287,1.,0.923879532511287,1.,0.923879532511287,1.,0.923879532511287,
1.,0.923879532511287,1.,0.941363740188677,0.973063524757817))
REPRESENTATION_ITEM('')
);
#213=(
BOUNDED_CURVE()
B_SPLINE_CURVE(2,(#177309,#177310,#177311,#177312,#177313,#177314,#177315,
#177316,#177317,#177318,#177319,#177320,#177321,#177322,#177323,#177324,
#177325),.UNSPECIFIED.,.F.,.F.)
B_SPLINE_CURVE_WITH_KNOTS((3,2,2,2,2,2,2,2,3),(0.345544463131744,0.3515625,
0.359375,0.3671875,0.375,0.3828125,0.390625,0.3984375,0.404455536868256),
 .UNSPECIFIED.)
CURVE()
GEOMETRIC_REPRESENTATION_ITEM()
RATIONAL_B_SPLINE_CURVE((0.973063524757819,0.941363740188675,1.,0.923879532511287,
1.,0.923879532511287,1.,0.923879532511287,1.,0.923879532511287,1.,0.923879532511287,
1.,0.923879532511287,1.,0.941363740188677,0.973063524757817))
REPRESENTATION_ITEM('')
);
#214=(
BOUNDED_CURVE()
B_SPLINE_CURVE(2,(#177331,#177332,#177333,#177334,#177335,#177336,#177337,
#177338,#177339,#177340,#177341,#177342,#177343,#177344,#177345,#177346,
#177347),.UNSPECIFIED.,.F.,.F.)
B_SPLINE_CURVE_WITH_KNOTS((3,2,2,2,2,2,2,2,3),(0.408044463131744,0.4140625,
0.421875,0.4296875,0.4375,0.4453125,0.453125,0.4609375,0.466955536868255),
 .UNSPECIFIED.)
CURVE()
GEOMETRIC_REPRESENTATION_ITEM()
RATIONAL_B_SPLINE_CURVE((0.973063524757819,0.941363740188675,1.,0.923879532511287,
1.,0.923879532511287,1.,0.923879532511287,1.,0.923879532511287,1.,0.923879532511287,
1.,0.923879532511287,1.,0.94136374018869,0.973063524757803))
REPRESENTATION_ITEM('')
);
#215=(
BOUNDED_CURVE()
B_SPLINE_CURVE(2,(#177350,#177351,#177352,#177353,#177354,#177355,#177356,
#177357,#177358,#177359,#177360,#177361,#177362,#177363,#177364,#177365,
#177366),.UNSPECIFIED.,.F.,.F.)
B_SPLINE_CURVE_WITH_KNOTS((3,2,2,2,2,2,2,2,3),(0.408044463131744,0.4140625,
0.421875,0.4296875,0.4375,0.4453125,0.453125,0.4609375,0.466955536868255),
 .UNSPECIFIED.)
CURVE()
GEOMETRIC_REPRESENTATION_ITEM()
RATIONAL_B_SPLINE_CURVE((0.973063524757819,0.941363740188675,1.,0.923879532511287,
1.,0.923879532511287,1.,0.923879532511287,1.,0.923879532511287,1.,0.923879532511287,
1.,0.923879532511287,1.,0.94136374018869,0.973063524757803))
REPRESENTATION_ITEM('')
);
#216=(
BOUNDED_CURVE()
B_SPLINE_CURVE(2,(#177372,#177373,#177374,#177375,#177376,#177377,#177378,
#177379,#177380,#177381,#177382,#177383,#177384,#177385,#177386,#177387,
#177388),.UNSPECIFIED.,.F.,.F.)
B_SPLINE_CURVE_WITH_KNOTS((3,2,2,2,2,2,2,2,3),(0.470544463131744,0.4765625,
0.484375,0.4921875,0.5,0.5078125,0.515625,0.5234375,0.529455536868256),
 .UNSPECIFIED.)
CURVE()
GEOMETRIC_REPRESENTATION_ITEM()
RATIONAL_B_SPLINE_CURVE((0.973063524757819,0.941363740188675,1.,0.923879532511287,
1.,0.923879532511287,1.,0.923879532511287,1.,0.923879532511287,1.,0.923879532511287,
1.,0.923879532511287,1.,0.941363740188675,0.973063524757818))
REPRESENTATION_ITEM('')
);
#217=(
BOUNDED_CURVE()
B_SPLINE_CURVE(2,(#177391,#177392,#177393,#177394,#177395,#177396,#177397,
#177398,#177399,#177400,#177401,#177402,#177403,#177404,#177405,#177406,
#177407),.UNSPECIFIED.,.F.,.F.)
B_SPLINE_CURVE_WITH_KNOTS((3,2,2,2,2,2,2,2,3),(0.470544463131744,0.4765625,
0.484375,0.4921875,0.5,0.5078125,0.515625,0.5234375,0.529455536868256),
 .UNSPECIFIED.)
CURVE()
GEOMETRIC_REPRESENTATION_ITEM()
RATIONAL_B_SPLINE_CURVE((0.973063524757819,0.941363740188675,1.,0.923879532511287,
1.,0.923879532511287,1.,0.923879532511287,1.,0.923879532511287,1.,0.923879532511287,
1.,0.923879532511287,1.,0.941363740188675,0.973063524757818))
REPRESENTATION_ITEM('')
);
#218=(
BOUNDED_CURVE()
B_SPLINE_CURVE(2,(#177413,#177414,#177415,#177416,#177417,#177418,#177419,
#177420,#177421,#177422,#177423,#177424,#177425,#177426,#177427,#177428,
#177429),.UNSPECIFIED.,.F.,.F.)
B_SPLINE_CURVE_WITH_KNOTS((3,2,2,2,2,2,2,2,3),(0.533044463131748,0.5390625,
0.546875,0.5546875,0.5625,0.5703125,0.578125,0.5859375,0.591955536868256),
 .UNSPECIFIED.)
CURVE()
GEOMETRIC_REPRESENTATION_ITEM()
RATIONAL_B_SPLINE_CURVE((0.973063524757771,0.941363740188719,1.,0.923879532511287,
1.,0.923879532511287,1.,0.923879532511287,1.,0.923879532511287,1.,0.923879532511287,
1.,0.923879532511287,1.,0.941363740188675,0.973063524757818))
REPRESENTATION_ITEM('')
);
#219=(
BOUNDED_CURVE()
B_SPLINE_CURVE(2,(#177432,#177433,#177434,#177435,#177436,#177437,#177438,
#177439,#177440,#177441,#177442,#177443,#177444,#177445,#177446,#177447,
#177448),.UNSPECIFIED.,.F.,.F.)
B_SPLINE_CURVE_WITH_KNOTS((3,2,2,2,2,2,2,2,3),(0.533044463131748,0.5390625,
0.546875,0.5546875,0.5625,0.5703125,0.578125,0.5859375,0.591955536868256),
 .UNSPECIFIED.)
CURVE()
GEOMETRIC_REPRESENTATION_ITEM()
RATIONAL_B_SPLINE_CURVE((0.973063524757771,0.941363740188719,1.,0.923879532511287,
1.,0.923879532511287,1.,0.923879532511287,1.,0.923879532511287,1.,0.923879532511287,
1.,0.923879532511287,1.,0.941363740188675,0.973063524757818))
REPRESENTATION_ITEM('')
);
#220=(
BOUNDED_CURVE()
B_SPLINE_CURVE(2,(#177454,#177455,#177456,#177457,#177458,#177459,#177460,
#177461,#177462,#177463,#177464,#177465,#177466,#177467,#177468,#177469,
#177470),.UNSPECIFIED.,.F.,.F.)
B_SPLINE_CURVE_WITH_KNOTS((3,2,2,2,2,2,2,2,3),(0.595544463131751,0.6015625,
0.609375,0.6171875,0.625,0.6328125,0.640625,0.6484375,0.654455536868256),
 .UNSPECIFIED.)
CURVE()
GEOMETRIC_REPRESENTATION_ITEM()
RATIONAL_B_SPLINE_CURVE((0.973063524757741,0.941363740188747,1.,0.923879532511287,
1.,0.923879532511287,1.,0.923879532511287,1.,0.923879532511287,1.,0.923879532511287,
1.,0.923879532511287,1.,0.941363740188675,0.973063524757818))
REPRESENTATION_ITEM('')
);
#221=(
BOUNDED_CURVE()
B_SPLINE_CURVE(2,(#177473,#177474,#177475,#177476,#177477,#177478,#177479,
#177480,#177481,#177482,#177483,#177484,#177485,#177486,#177487,#177488,
#177489),.UNSPECIFIED.,.F.,.F.)
B_SPLINE_CURVE_WITH_KNOTS((3,2,2,2,2,2,2,2,3),(0.595544463131751,0.6015625,
0.609375,0.6171875,0.625,0.6328125,0.640625,0.6484375,0.654455536868256),
 .UNSPECIFIED.)
CURVE()
GEOMETRIC_REPRESENTATION_ITEM()
RATIONAL_B_SPLINE_CURVE((0.973063524757741,0.941363740188747,1.,0.923879532511287,
1.,0.923879532511287,1.,0.923879532511287,1.,0.923879532511287,1.,0.923879532511287,
1.,0.923879532511287,1.,0.941363740188675,0.973063524757818))
REPRESENTATION_ITEM('')
);
#222=(
BOUNDED_CURVE()
B_SPLINE_CURVE(2,(#177495,#177496,#177497,#177498,#177499,#177500,#177501,
#177502,#177503,#177504,#177505,#177506,#177507,#177508,#177509,#177510,
#177511),.UNSPECIFIED.,.F.,.F.)
B_SPLINE_CURVE_WITH_KNOTS((3,2,2,2,2,2,2,2,3),(0.658044463131744,0.6640625,
0.671875,0.6796875,0.6875,0.6953125,0.703125,0.7109375,0.716955536868256),
 .UNSPECIFIED.)
CURVE()
GEOMETRIC_REPRESENTATION_ITEM()
RATIONAL_B_SPLINE_CURVE((0.973063524757819,0.941363740188674,1.,0.923879532511287,
1.,0.923879532511287,1.,0.923879532511287,1.,0.923879532511287,1.,0.923879532511287,
1.,0.923879532511287,1.,0.941363740188675,0.973063524757818))
REPRESENTATION_ITEM('')
);
#223=(
BOUNDED_CURVE()
B_SPLINE_CURVE(2,(#177514,#177515,#177516,#177517,#177518,#177519,#177520,
#177521,#177522,#177523,#177524,#177525,#177526,#177527,#177528,#177529,
#177530),.UNSPECIFIED.,.F.,.F.)
B_SPLINE_CURVE_WITH_KNOTS((3,2,2,2,2,2,2,2,3),(0.658044463131744,0.6640625,
0.671875,0.6796875,0.6875,0.6953125,0.703125,0.7109375,0.716955536868256),
 .UNSPECIFIED.)
CURVE()
GEOMETRIC_REPRESENTATION_ITEM()
RATIONAL_B_SPLINE_CURVE((0.973063524757819,0.941363740188674,1.,0.923879532511287,
1.,0.923879532511287,1.,0.923879532511287,1.,0.923879532511287,1.,0.923879532511287,
1.,0.923879532511287,1.,0.941363740188675,0.973063524757818))
REPRESENTATION_ITEM('')
);
#224=(
BOUNDED_CURVE()
B_SPLINE_CURVE(2,(#177536,#177537,#177538,#177539,#177540,#177541,#177542,
#177543,#177544,#177545,#177546,#177547,#177548,#177549,#177550,#177551,
#177552),.UNSPECIFIED.,.F.,.F.)
B_SPLINE_CURVE_WITH_KNOTS((3,2,2,2,2,2,2,2,3),(0.720544463131744,0.7265625,
0.734375,0.7421875,0.75,0.7578125,0.765625,0.7734375,0.779455536868256),
 .UNSPECIFIED.)
CURVE()
GEOMETRIC_REPRESENTATION_ITEM()
RATIONAL_B_SPLINE_CURVE((0.973063524757819,0.941363740188674,1.,0.923879532511287,
1.,0.923879532511287,1.,0.923879532511287,1.,0.923879532511287,1.,0.923879532511287,
1.,0.923879532511287,1.,0.941363740188675,0.973063524757818))
REPRESENTATION_ITEM('')
);
#225=(
BOUNDED_CURVE()
B_SPLINE_CURVE(2,(#177555,#177556,#177557,#177558,#177559,#177560,#177561,
#177562,#177563,#177564,#177565,#177566,#177567,#177568,#177569,#177570,
#177571),.UNSPECIFIED.,.F.,.F.)
B_SPLINE_CURVE_WITH_KNOTS((3,2,2,2,2,2,2,2,3),(0.720544463131744,0.7265625,
0.734375,0.7421875,0.75,0.7578125,0.765625,0.7734375,0.779455536868256),
 .UNSPECIFIED.)
CURVE()
GEOMETRIC_REPRESENTATION_ITEM()
RATIONAL_B_SPLINE_CURVE((0.973063524757819,0.941363740188674,1.,0.923879532511287,
1.,0.923879532511287,1.,0.923879532511287,1.,0.923879532511287,1.,0.923879532511287,
1.,0.923879532511287,1.,0.941363740188675,0.973063524757818))
REPRESENTATION_ITEM('')
);
#226=(
BOUNDED_CURVE()
B_SPLINE_CURVE(2,(#177577,#177578,#177579,#177580,#177581,#177582,#177583,
#177584,#177585,#177586,#177587,#177588,#177589,#177590,#177591,#177592,
#177593),.UNSPECIFIED.,.F.,.F.)
B_SPLINE_CURVE_WITH_KNOTS((3,2,2,2,2,2,2,2,3),(0.783044463131744,0.7890625,
0.796875,0.8046875,0.8125,0.8203125,0.828125,0.8359375,0.841955536868256),
 .UNSPECIFIED.)
CURVE()
GEOMETRIC_REPRESENTATION_ITEM()
RATIONAL_B_SPLINE_CURVE((0.973063524757818,0.941363740188675,1.,0.923879532511287,
1.,0.923879532511287,1.,0.923879532511287,1.,0.923879532511287,1.,0.923879532511287,
1.,0.923879532511287,1.,0.941363740188675,0.973063524757818))
REPRESENTATION_ITEM('')
);
#227=(
BOUNDED_CURVE()
B_SPLINE_CURVE(2,(#177596,#177597,#177598,#177599,#177600,#177601,#177602,
#177603,#177604,#177605,#177606,#177607,#177608,#177609,#177610,#177611,
#177612),.UNSPECIFIED.,.F.,.F.)
B_SPLINE_CURVE_WITH_KNOTS((3,2,2,2,2,2,2,2,3),(0.783044463131744,0.7890625,
0.796875,0.8046875,0.8125,0.8203125,0.828125,0.8359375,0.841955536868256),
 .UNSPECIFIED.)
CURVE()
GEOMETRIC_REPRESENTATION_ITEM()
RATIONAL_B_SPLINE_CURVE((0.973063524757818,0.941363740188675,1.,0.923879532511287,
1.,0.923879532511287,1.,0.923879532511287,1.,0.923879532511287,1.,0.923879532511287,
1.,0.923879532511287,1.,0.941363740188675,0.973063524757818))
REPRESENTATION_ITEM('')
);
#228=(
BOUNDED_CURVE()
B_SPLINE_CURVE(2,(#177618,#177619,#177620,#177621,#177622,#177623,#177624,
#177625,#177626,#177627,#177628,#177629,#177630,#177631,#177632,#177633,
#177634),.UNSPECIFIED.,.F.,.F.)
B_SPLINE_CURVE_WITH_KNOTS((3,2,2,2,2,2,2,2,3),(0.845544463131744,0.8515625,
0.859375,0.8671875,0.875,0.8828125,0.890625,0.8984375,0.904455536868256),
 .UNSPECIFIED.)
CURVE()
GEOMETRIC_REPRESENTATION_ITEM()
RATIONAL_B_SPLINE_CURVE((0.973063524757819,0.941363740188674,1.,0.923879532511287,
1.,0.923879532511287,1.,0.923879532511287,1.,0.923879532511287,1.,0.923879532511287,
1.,0.923879532511287,1.,0.941363740188675,0.973063524757818))
REPRESENTATION_ITEM('')
);
#229=(
BOUNDED_CURVE()
B_SPLINE_CURVE(2,(#177637,#177638,#177639,#177640,#177641,#177642,#177643,
#177644,#177645,#177646,#177647,#177648,#177649,#177650,#177651,#177652,
#177653),.UNSPECIFIED.,.F.,.F.)
B_SPLINE_CURVE_WITH_KNOTS((3,2,2,2,2,2,2,2,3),(0.845544463131744,0.8515625,
0.859375,0.8671875,0.875,0.8828125,0.890625,0.8984375,0.904455536868256),
 .UNSPECIFIED.)
CURVE()
GEOMETRIC_REPRESENTATION_ITEM()
RATIONAL_B_SPLINE_CURVE((0.973063524757819,0.941363740188674,1.,0.923879532511287,
1.,0.923879532511287,1.,0.923879532511287,1.,0.923879532511287,1.,0.923879532511287,
1.,0.923879532511287,1.,0.941363740188677,0.973063524757817))
REPRESENTATION_ITEM('')
);
#230=(
BOUNDED_CURVE()
B_SPLINE_CURVE(2,(#190303,#190304,#190305,#190306,#190307,#190308,#190309,
#190310,#190311,#190312,#190313,#190314,#190315,#190316,#190317,#190318,
#190319),.UNSPECIFIED.,.F.,.F.)
B_SPLINE_CURVE_WITH_KNOTS((3,2,2,2,2,2,2,2,3),(0.100463184977696,0.1015625,
0.109375,0.1171875,0.125,0.1328125,0.140625,0.1484375,0.154455536868256),
 .UNSPECIFIED.)
CURVE()
GEOMETRIC_REPRESENTATION_ITEM()
RATIONAL_B_SPLINE_CURVE((0.981592188494203,0.989288912202864,1.,0.923879532511287,
1.,0.923879532511287,1.,0.923879532511287,1.,0.923879532511287,1.,0.923879532511287,
1.,0.923879532511287,1.,0.941363740188675,0.973063524757818))
REPRESENTATION_ITEM('')
);
#231=(
BOUNDED_CURVE()
B_SPLINE_CURVE(2,(#190322,#190323,#190324,#190325,#190326,#190327,#190328,
#190329,#190330,#190331,#190332,#190333,#190334,#190335,#190336,#190337,
#190338),.UNSPECIFIED.,.F.,.F.)
B_SPLINE_CURVE_WITH_KNOTS((3,2,2,2,2,2,2,2,3),(0.0955444631317474,0.1015625,
0.109375,0.1171875,0.125,0.1328125,0.140625,0.1484375,0.154455536868256),
 .UNSPECIFIED.)
CURVE()
GEOMETRIC_REPRESENTATION_ITEM()
RATIONAL_B_SPLINE_CURVE((0.97306352475778,0.94136374018871,1.,0.923879532511287,
1.,0.923879532511287,1.,0.923879532511287,1.,0.923879532511287,1.,0.923879532511287,
1.,0.923879532511287,1.,0.941363740188675,0.973063524757818))
REPRESENTATION_ITEM('')
);
#232=(
BOUNDED_CURVE()
B_SPLINE_CURVE(2,(#191433,#191434,#191435),.UNSPECIFIED.,.F.,.F.)
B_SPLINE_CURVE_WITH_KNOTS((3,3),(-1.58607513819989,-1.04401683911549),
 .UNSPECIFIED.)
CURVE()
GEOMETRIC_REPRESENTATION_ITEM()
RATIONAL_B_SPLINE_CURVE((1.26515913542554,1.36301953511842,1.36301953511842))
REPRESENTATION_ITEM('')
);
#233=(
BOUNDED_CURVE()
B_SPLINE_CURVE(2,(#191437,#191438,#191439),.UNSPECIFIED.,.F.,.F.)
B_SPLINE_CURVE_WITH_KNOTS((3,3),(-1.04401683911549,-0.501958540031085),
 .UNSPECIFIED.)
CURVE()
GEOMETRIC_REPRESENTATION_ITEM()
RATIONAL_B_SPLINE_CURVE((1.36301953511842,1.36301953511842,1.26515913542554))
REPRESENTATION_ITEM('')
);
#234=(
BOUNDED_CURVE()
B_SPLINE_CURVE(2,(#191442,#191443,#191444),.UNSPECIFIED.,.F.,.F.)
B_SPLINE_CURVE_WITH_KNOTS((3,3),(-1.58607513819989,-1.04401683911548),
 .UNSPECIFIED.)
CURVE()
GEOMETRIC_REPRESENTATION_ITEM()
RATIONAL_B_SPLINE_CURVE((1.26515913542554,1.36301953511842,1.36301953511842))
REPRESENTATION_ITEM('')
);
#235=(
BOUNDED_CURVE()
B_SPLINE_CURVE(2,(#191445,#191446,#191447),.UNSPECIFIED.,.F.,.F.)
B_SPLINE_CURVE_WITH_KNOTS((3,3),(-1.04401683911548,-0.501958540031083),
 .UNSPECIFIED.)
CURVE()
GEOMETRIC_REPRESENTATION_ITEM()
RATIONAL_B_SPLINE_CURVE((1.36301953511842,1.36301953511842,1.26515913542554))
REPRESENTATION_ITEM('')
);
#236=(
BOUNDED_CURVE()
B_SPLINE_CURVE(2,(#191449,#191450,#191451),.UNSPECIFIED.,.F.,.F.)
B_SPLINE_CURVE_WITH_KNOTS((3,3),(-1.58607513819989,-1.04401683911549),
 .UNSPECIFIED.)
CURVE()
GEOMETRIC_REPRESENTATION_ITEM()
RATIONAL_B_SPLINE_CURVE((1.26515913542554,1.36301953511842,1.36301953511842))
REPRESENTATION_ITEM('')
);
#237=(
BOUNDED_CURVE()
B_SPLINE_CURVE(2,(#191453,#191454,#191455),.UNSPECIFIED.,.F.,.F.)
B_SPLINE_CURVE_WITH_KNOTS((3,3),(-1.04401683911549,-0.501958540031083),
 .UNSPECIFIED.)
CURVE()
GEOMETRIC_REPRESENTATION_ITEM()
RATIONAL_B_SPLINE_CURVE((1.36301953511842,1.36301953511842,1.26515913542554))
REPRESENTATION_ITEM('')
);
#238=(
BOUNDED_CURVE()
B_SPLINE_CURVE(2,(#191458,#191459,#191460),.UNSPECIFIED.,.F.,.F.)
B_SPLINE_CURVE_WITH_KNOTS((3,3),(-1.58607513819988,-1.04401683911548),
 .UNSPECIFIED.)
CURVE()
GEOMETRIC_REPRESENTATION_ITEM()
RATIONAL_B_SPLINE_CURVE((1.26515913542554,1.36301953511842,1.36301953511842))
REPRESENTATION_ITEM('')
);
#239=(
BOUNDED_CURVE()
B_SPLINE_CURVE(2,(#191461,#191462,#191463),.UNSPECIFIED.,.F.,.F.)
B_SPLINE_CURVE_WITH_KNOTS((3,3),(-1.04401683911548,-0.501958540031083),
 .UNSPECIFIED.)
CURVE()
GEOMETRIC_REPRESENTATION_ITEM()
RATIONAL_B_SPLINE_CURVE((1.36301953511842,1.36301953511842,1.26515913542554))
REPRESENTATION_ITEM('')
);
#240=(
BOUNDED_CURVE()
B_SPLINE_CURVE(2,(#191465,#191466,#191467),.UNSPECIFIED.,.F.,.F.)
B_SPLINE_CURVE_WITH_KNOTS((3,3),(-1.58607513819989,-1.04401683911549),
 .UNSPECIFIED.)
CURVE()
GEOMETRIC_REPRESENTATION_ITEM()
RATIONAL_B_SPLINE_CURVE((1.26515913542554,1.36301953511842,1.36301953511842))
REPRESENTATION_ITEM('')
);
#241=(
BOUNDED_CURVE()
B_SPLINE_CURVE(2,(#191469,#191470,#191471),.UNSPECIFIED.,.F.,.F.)
B_SPLINE_CURVE_WITH_KNOTS((3,3),(-1.04401683911549,-0.501958540031085),
 .UNSPECIFIED.)
CURVE()
GEOMETRIC_REPRESENTATION_ITEM()
RATIONAL_B_SPLINE_CURVE((1.36301953511842,1.36301953511842,1.26515913542554))
REPRESENTATION_ITEM('')
);
#242=(
BOUNDED_CURVE()
B_SPLINE_CURVE(2,(#191474,#191475,#191476),.UNSPECIFIED.,.F.,.F.)
B_SPLINE_CURVE_WITH_KNOTS((3,3),(-1.58607513819989,-1.04401683911549),
 .UNSPECIFIED.)
CURVE()
GEOMETRIC_REPRESENTATION_ITEM()
RATIONAL_B_SPLINE_CURVE((1.26515913542554,1.36301953511842,1.36301953511842))
REPRESENTATION_ITEM('')
);
#243=(
BOUNDED_CURVE()
B_SPLINE_CURVE(2,(#191477,#191478,#191479),.UNSPECIFIED.,.F.,.F.)
B_SPLINE_CURVE_WITH_KNOTS((3,3),(-1.04401683911549,-0.501958540031085),
 .UNSPECIFIED.)
CURVE()
GEOMETRIC_REPRESENTATION_ITEM()
RATIONAL_B_SPLINE_CURVE((1.36301953511842,1.36301953511842,1.26515913542554))
REPRESENTATION_ITEM('')
);
#244=(
BOUNDED_CURVE()
B_SPLINE_CURVE(2,(#191481,#191482,#191483),.UNSPECIFIED.,.F.,.F.)
B_SPLINE_CURVE_WITH_KNOTS((3,3),(-1.58607513819989,-1.04401683911549),
 .UNSPECIFIED.)
CURVE()
GEOMETRIC_REPRESENTATION_ITEM()
RATIONAL_B_SPLINE_CURVE((1.26515913542555,1.36301953511843,1.36301953511843))
REPRESENTATION_ITEM('')
);
#245=(
BOUNDED_CURVE()
B_SPLINE_CURVE(2,(#191485,#191486,#191487),.UNSPECIFIED.,.F.,.F.)
B_SPLINE_CURVE_WITH_KNOTS((3,3),(-1.04401683911549,-0.501958540031082),
 .UNSPECIFIED.)
CURVE()
GEOMETRIC_REPRESENTATION_ITEM()
RATIONAL_B_SPLINE_CURVE((1.36301953511843,1.36301953511843,1.26515913542555))
REPRESENTATION_ITEM('')
);
#246=(
BOUNDED_CURVE()
B_SPLINE_CURVE(2,(#191490,#191491,#191492),.UNSPECIFIED.,.F.,.F.)
B_SPLINE_CURVE_WITH_KNOTS((3,3),(-1.58607513819989,-1.04401683911549),
 .UNSPECIFIED.)
CURVE()
GEOMETRIC_REPRESENTATION_ITEM()
RATIONAL_B_SPLINE_CURVE((1.26515913542554,1.36301953511843,1.36301953511843))
REPRESENTATION_ITEM('')
);
#247=(
BOUNDED_CURVE()
B_SPLINE_CURVE(2,(#191493,#191494,#191495),.UNSPECIFIED.,.F.,.F.)
B_SPLINE_CURVE_WITH_KNOTS((3,3),(-1.04401683911549,-0.501958540031087),
 .UNSPECIFIED.)
CURVE()
GEOMETRIC_REPRESENTATION_ITEM()
RATIONAL_B_SPLINE_CURVE((1.36301953511843,1.36301953511843,1.26515913542555))
REPRESENTATION_ITEM('')
);
#248=(
BOUNDED_CURVE()
B_SPLINE_CURVE(2,(#191497,#191498,#191499),.UNSPECIFIED.,.F.,.F.)
B_SPLINE_CURVE_WITH_KNOTS((3,3),(-1.58607513819988,-1.04401683911548),
 .UNSPECIFIED.)
CURVE()
GEOMETRIC_REPRESENTATION_ITEM()
RATIONAL_B_SPLINE_CURVE((1.26515913542554,1.36301953511842,1.36301953511842))
REPRESENTATION_ITEM('')
);
#249=(
BOUNDED_CURVE()
B_SPLINE_CURVE(2,(#191501,#191502,#191503),.UNSPECIFIED.,.F.,.F.)
B_SPLINE_CURVE_WITH_KNOTS((3,3),(-1.04401683911548,-0.501958540031083),
 .UNSPECIFIED.)
CURVE()
GEOMETRIC_REPRESENTATION_ITEM()
RATIONAL_B_SPLINE_CURVE((1.36301953511842,1.36301953511842,1.26515913542554))
REPRESENTATION_ITEM('')
);
#250=(
BOUNDED_CURVE()
B_SPLINE_CURVE(2,(#191506,#191507,#191508),.UNSPECIFIED.,.F.,.F.)
B_SPLINE_CURVE_WITH_KNOTS((3,3),(-1.58607513819988,-1.04401683911548),
 .UNSPECIFIED.)
CURVE()
GEOMETRIC_REPRESENTATION_ITEM()
RATIONAL_B_SPLINE_CURVE((1.26515913542554,1.36301953511842,1.36301953511842))
REPRESENTATION_ITEM('')
);
#251=(
BOUNDED_CURVE()
B_SPLINE_CURVE(2,(#191509,#191510,#191511),.UNSPECIFIED.,.F.,.F.)
B_SPLINE_CURVE_WITH_KNOTS((3,3),(-1.04401683911548,-0.501958540031083),
 .UNSPECIFIED.)
CURVE()
GEOMETRIC_REPRESENTATION_ITEM()
RATIONAL_B_SPLINE_CURVE((1.36301953511842,1.36301953511842,1.26515913542554))
REPRESENTATION_ITEM('')
);
#252=(
BOUNDED_CURVE()
B_SPLINE_CURVE(2,(#191513,#191514,#191515),.UNSPECIFIED.,.F.,.F.)
B_SPLINE_CURVE_WITH_KNOTS((3,3),(-1.58607513819989,-1.04401683911549),
 .UNSPECIFIED.)
CURVE()
GEOMETRIC_REPRESENTATION_ITEM()
RATIONAL_B_SPLINE_CURVE((1.26515913542554,1.36301953511843,1.36301953511843))
REPRESENTATION_ITEM('')
);
#253=(
BOUNDED_CURVE()
B_SPLINE_CURVE(2,(#191516,#191517,#191518),.UNSPECIFIED.,.F.,.F.)
B_SPLINE_CURVE_WITH_KNOTS((3,3),(-1.04401683911549,-0.501958540031085),
 .UNSPECIFIED.)
CURVE()
GEOMETRIC_REPRESENTATION_ITEM()
RATIONAL_B_SPLINE_CURVE((1.36301953511843,1.36301953511843,1.26515913542554))
REPRESENTATION_ITEM('')
);
#254=(
BOUNDED_CURVE()
B_SPLINE_CURVE(2,(#191519,#191520,#191521),.UNSPECIFIED.,.F.,.F.)
B_SPLINE_CURVE_WITH_KNOTS((3,3),(-1.58607513819989,-1.04401683911549),
 .UNSPECIFIED.)
CURVE()
GEOMETRIC_REPRESENTATION_ITEM()
RATIONAL_B_SPLINE_CURVE((1.26515913542554,1.36301953511843,1.36301953511843))
REPRESENTATION_ITEM('')
);
#255=(
BOUNDED_CURVE()
B_SPLINE_CURVE(2,(#191522,#191523,#191524),.UNSPECIFIED.,.F.,.F.)
B_SPLINE_CURVE_WITH_KNOTS((3,3),(-1.04401683911549,-0.501958540031084),
 .UNSPECIFIED.)
CURVE()
GEOMETRIC_REPRESENTATION_ITEM()
RATIONAL_B_SPLINE_CURVE((1.36301953511843,1.36301953511843,1.26515913542555))
REPRESENTATION_ITEM('')
);
#256=(
BOUNDED_CURVE()
B_SPLINE_CURVE(2,(#191583,#191584,#191585),.UNSPECIFIED.,.F.,.F.)
B_SPLINE_CURVE_WITH_KNOTS((3,3),(-1.58607513819989,-1.04401683911549),
 .UNSPECIFIED.)
CURVE()
GEOMETRIC_REPRESENTATION_ITEM()
RATIONAL_B_SPLINE_CURVE((1.26515913542554,1.36301953511842,1.36301953511842))
REPRESENTATION_ITEM('')
);
#257=(
BOUNDED_CURVE()
B_SPLINE_CURVE(2,(#191587,#191588,#191589),.UNSPECIFIED.,.F.,.F.)
B_SPLINE_CURVE_WITH_KNOTS((3,3),(-1.04401683911549,-0.501958540031084),
 .UNSPECIFIED.)
CURVE()
GEOMETRIC_REPRESENTATION_ITEM()
RATIONAL_B_SPLINE_CURVE((1.36301953511842,1.36301953511842,1.26515913542554))
REPRESENTATION_ITEM('')
);
#258=(
BOUNDED_CURVE()
B_SPLINE_CURVE(2,(#191592,#191593,#191594),.UNSPECIFIED.,.F.,.F.)
B_SPLINE_CURVE_WITH_KNOTS((3,3),(-1.58607513819989,-1.04401683911548),
 .UNSPECIFIED.)
CURVE()
GEOMETRIC_REPRESENTATION_ITEM()
RATIONAL_B_SPLINE_CURVE((1.26515913542554,1.36301953511842,1.36301953511842))
REPRESENTATION_ITEM('')
);
#259=(
BOUNDED_CURVE()
B_SPLINE_CURVE(2,(#191595,#191596,#191597),.UNSPECIFIED.,.F.,.F.)
B_SPLINE_CURVE_WITH_KNOTS((3,3),(-1.04401683911548,-0.501958540031083),
 .UNSPECIFIED.)
CURVE()
GEOMETRIC_REPRESENTATION_ITEM()
RATIONAL_B_SPLINE_CURVE((1.36301953511842,1.36301953511842,1.26515913542554))
REPRESENTATION_ITEM('')
);
#260=(
BOUNDED_CURVE()
B_SPLINE_CURVE(2,(#191599,#191600,#191601),.UNSPECIFIED.,.F.,.F.)
B_SPLINE_CURVE_WITH_KNOTS((3,3),(-1.58607513819989,-1.04401683911549),
 .UNSPECIFIED.)
CURVE()
GEOMETRIC_REPRESENTATION_ITEM()
RATIONAL_B_SPLINE_CURVE((1.26515913542554,1.36301953511842,1.36301953511842))
REPRESENTATION_ITEM('')
);
#261=(
BOUNDED_CURVE()
B_SPLINE_CURVE(2,(#191603,#191604,#191605),.UNSPECIFIED.,.F.,.F.)
B_SPLINE_CURVE_WITH_KNOTS((3,3),(-1.04401683911549,-0.501958540031083),
 .UNSPECIFIED.)
CURVE()
GEOMETRIC_REPRESENTATION_ITEM()
RATIONAL_B_SPLINE_CURVE((1.36301953511842,1.36301953511842,1.26515913542554))
REPRESENTATION_ITEM('')
);
#262=(
BOUNDED_CURVE()
B_SPLINE_CURVE(2,(#191608,#191609,#191610),.UNSPECIFIED.,.F.,.F.)
B_SPLINE_CURVE_WITH_KNOTS((3,3),(-1.58607513819989,-1.04401683911548),
 .UNSPECIFIED.)
CURVE()
GEOMETRIC_REPRESENTATION_ITEM()
RATIONAL_B_SPLINE_CURVE((1.26515913542554,1.36301953511842,1.36301953511842))
REPRESENTATION_ITEM('')
);
#263=(
BOUNDED_CURVE()
B_SPLINE_CURVE(2,(#191611,#191612,#191613),.UNSPECIFIED.,.F.,.F.)
B_SPLINE_CURVE_WITH_KNOTS((3,3),(-1.04401683911548,-0.501958540031084),
 .UNSPECIFIED.)
CURVE()
GEOMETRIC_REPRESENTATION_ITEM()
RATIONAL_B_SPLINE_CURVE((1.36301953511842,1.36301953511842,1.26515913542554))
REPRESENTATION_ITEM('')
);
#264=(
BOUNDED_CURVE()
B_SPLINE_CURVE(2,(#191615,#191616,#191617),.UNSPECIFIED.,.F.,.F.)
B_SPLINE_CURVE_WITH_KNOTS((3,3),(-1.58607513819989,-1.04401683911549),
 .UNSPECIFIED.)
CURVE()
GEOMETRIC_REPRESENTATION_ITEM()
RATIONAL_B_SPLINE_CURVE((1.26515913542554,1.36301953511842,1.36301953511842))
REPRESENTATION_ITEM('')
);
#265=(
BOUNDED_CURVE()
B_SPLINE_CURVE(2,(#191619,#191620,#191621),.UNSPECIFIED.,.F.,.F.)
B_SPLINE_CURVE_WITH_KNOTS((3,3),(-1.04401683911549,-0.501958540031086),
 .UNSPECIFIED.)
CURVE()
GEOMETRIC_REPRESENTATION_ITEM()
RATIONAL_B_SPLINE_CURVE((1.36301953511842,1.36301953511842,1.26515913542554))
REPRESENTATION_ITEM('')
);
#266=(
BOUNDED_CURVE()
B_SPLINE_CURVE(2,(#191624,#191625,#191626),.UNSPECIFIED.,.F.,.F.)
B_SPLINE_CURVE_WITH_KNOTS((3,3),(-1.58607513819989,-1.04401683911549),
 .UNSPECIFIED.)
CURVE()
GEOMETRIC_REPRESENTATION_ITEM()
RATIONAL_B_SPLINE_CURVE((1.26515913542554,1.36301953511842,1.36301953511842))
REPRESENTATION_ITEM('')
);
#267=(
BOUNDED_CURVE()
B_SPLINE_CURVE(2,(#191627,#191628,#191629),.UNSPECIFIED.,.F.,.F.)
B_SPLINE_CURVE_WITH_KNOTS((3,3),(-1.04401683911549,-0.501958540031085),
 .UNSPECIFIED.)
CURVE()
GEOMETRIC_REPRESENTATION_ITEM()
RATIONAL_B_SPLINE_CURVE((1.36301953511842,1.36301953511842,1.26515913542554))
REPRESENTATION_ITEM('')
);
#268=(
BOUNDED_CURVE()
B_SPLINE_CURVE(2,(#191631,#191632,#191633),.UNSPECIFIED.,.F.,.F.)
B_SPLINE_CURVE_WITH_KNOTS((3,3),(-1.58607513819989,-1.04401683911549),
 .UNSPECIFIED.)
CURVE()
GEOMETRIC_REPRESENTATION_ITEM()
RATIONAL_B_SPLINE_CURVE((1.26515913542555,1.36301953511843,1.36301953511843))
REPRESENTATION_ITEM('')
);
#269=(
BOUNDED_CURVE()
B_SPLINE_CURVE(2,(#191635,#191636,#191637),.UNSPECIFIED.,.F.,.F.)
B_SPLINE_CURVE_WITH_KNOTS((3,3),(-1.04401683911549,-0.501958540031083),
 .UNSPECIFIED.)
CURVE()
GEOMETRIC_REPRESENTATION_ITEM()
RATIONAL_B_SPLINE_CURVE((1.36301953511843,1.36301953511843,1.26515913542555))
REPRESENTATION_ITEM('')
);
#270=(
BOUNDED_CURVE()
B_SPLINE_CURVE(2,(#191640,#191641,#191642),.UNSPECIFIED.,.F.,.F.)
B_SPLINE_CURVE_WITH_KNOTS((3,3),(-1.58607513819989,-1.04401683911549),
 .UNSPECIFIED.)
CURVE()
GEOMETRIC_REPRESENTATION_ITEM()
RATIONAL_B_SPLINE_CURVE((1.26515913542554,1.36301953511842,1.36301953511842))
REPRESENTATION_ITEM('')
);
#271=(
BOUNDED_CURVE()
B_SPLINE_CURVE(2,(#191643,#191644,#191645),.UNSPECIFIED.,.F.,.F.)
B_SPLINE_CURVE_WITH_KNOTS((3,3),(-1.04401683911549,-0.501958540031086),
 .UNSPECIFIED.)
CURVE()
GEOMETRIC_REPRESENTATION_ITEM()
RATIONAL_B_SPLINE_CURVE((1.36301953511842,1.36301953511842,1.26515913542554))
REPRESENTATION_ITEM('')
);
#272=(
BOUNDED_CURVE()
B_SPLINE_CURVE(2,(#191647,#191648,#191649),.UNSPECIFIED.,.F.,.F.)
B_SPLINE_CURVE_WITH_KNOTS((3,3),(-1.58607513819988,-1.04401683911548),
 .UNSPECIFIED.)
CURVE()
GEOMETRIC_REPRESENTATION_ITEM()
RATIONAL_B_SPLINE_CURVE((1.26515913542554,1.36301953511842,1.36301953511842))
REPRESENTATION_ITEM('')
);
#273=(
BOUNDED_CURVE()
B_SPLINE_CURVE(2,(#191651,#191652,#191653),.UNSPECIFIED.,.F.,.F.)
B_SPLINE_CURVE_WITH_KNOTS((3,3),(-1.04401683911548,-0.501958540031082),
 .UNSPECIFIED.)
CURVE()
GEOMETRIC_REPRESENTATION_ITEM()
RATIONAL_B_SPLINE_CURVE((1.36301953511842,1.36301953511842,1.26515913542554))
REPRESENTATION_ITEM('')
);
#274=(
BOUNDED_CURVE()
B_SPLINE_CURVE(2,(#191656,#191657,#191658),.UNSPECIFIED.,.F.,.F.)
B_SPLINE_CURVE_WITH_KNOTS((3,3),(-1.58607513819989,-1.04401683911548),
 .UNSPECIFIED.)
CURVE()
GEOMETRIC_REPRESENTATION_ITEM()
RATIONAL_B_SPLINE_CURVE((1.26515913542554,1.36301953511842,1.36301953511842))
REPRESENTATION_ITEM('')
);
#275=(
BOUNDED_CURVE()
B_SPLINE_CURVE(2,(#191659,#191660,#191661),.UNSPECIFIED.,.F.,.F.)
B_SPLINE_CURVE_WITH_KNOTS((3,3),(-1.04401683911548,-0.501958540031083),
 .UNSPECIFIED.)
CURVE()
GEOMETRIC_REPRESENTATION_ITEM()
RATIONAL_B_SPLINE_CURVE((1.36301953511842,1.36301953511842,1.26515913542554))
REPRESENTATION_ITEM('')
);
#276=(
BOUNDED_CURVE()
B_SPLINE_CURVE(2,(#191663,#191664,#191665),.UNSPECIFIED.,.F.,.F.)
B_SPLINE_CURVE_WITH_KNOTS((3,3),(-1.58607513819989,-1.04401683911549),
 .UNSPECIFIED.)
CURVE()
GEOMETRIC_REPRESENTATION_ITEM()
RATIONAL_B_SPLINE_CURVE((1.26515913542554,1.36301953511843,1.36301953511843))
REPRESENTATION_ITEM('')
);
#277=(
BOUNDED_CURVE()
B_SPLINE_CURVE(2,(#191666,#191667,#191668),.UNSPECIFIED.,.F.,.F.)
B_SPLINE_CURVE_WITH_KNOTS((3,3),(-1.04401683911549,-0.501958540031085),
 .UNSPECIFIED.)
CURVE()
GEOMETRIC_REPRESENTATION_ITEM()
RATIONAL_B_SPLINE_CURVE((1.36301953511843,1.36301953511843,1.26515913542554))
REPRESENTATION_ITEM('')
);
#278=(
BOUNDED_CURVE()
B_SPLINE_CURVE(2,(#191669,#191670,#191671),.UNSPECIFIED.,.F.,.F.)
B_SPLINE_CURVE_WITH_KNOTS((3,3),(-1.58607513819989,-1.04401683911549),
 .UNSPECIFIED.)
CURVE()
GEOMETRIC_REPRESENTATION_ITEM()
RATIONAL_B_SPLINE_CURVE((1.26515913542554,1.36301953511843,1.36301953511843))
REPRESENTATION_ITEM('')
);
#279=(
BOUNDED_CURVE()
B_SPLINE_CURVE(2,(#191672,#191673,#191674),.UNSPECIFIED.,.F.,.F.)
B_SPLINE_CURVE_WITH_KNOTS((3,3),(-1.04401683911548,-0.501958540031084),
 .UNSPECIFIED.)
CURVE()
GEOMETRIC_REPRESENTATION_ITEM()
RATIONAL_B_SPLINE_CURVE((1.36301953511843,1.36301953511843,1.26515913542555))
REPRESENTATION_ITEM('')
);
#280=(
BOUNDED_CURVE()
B_SPLINE_CURVE(3,(#196622,#196623,#196624,#196625),.UNSPECIFIED.,.F.,.F.)
B_SPLINE_CURVE_WITH_KNOTS((4,4),(0.,1.),.UNSPECIFIED.)
CURVE()
GEOMETRIC_REPRESENTATION_ITEM()
RATIONAL_B_SPLINE_CURVE((1.,0.99999465200077,0.99999465200077,1.))
REPRESENTATION_ITEM('')
);
#281=(
BOUNDED_CURVE()
B_SPLINE_CURVE(3,(#198554,#198555,#198556,#198557),.UNSPECIFIED.,.F.,.F.)
B_SPLINE_CURVE_WITH_KNOTS((4,4),(0.,1.),.UNSPECIFIED.)
CURVE()
GEOMETRIC_REPRESENTATION_ITEM()
RATIONAL_B_SPLINE_CURVE((1.,0.999975392871622,0.999975392871622,1.))
REPRESENTATION_ITEM('')
);
#282=(
BOUNDED_CURVE()
B_SPLINE_CURVE(2,(#199463,#199464,#199465),.UNSPECIFIED.,.F.,.F.)
B_SPLINE_CURVE_WITH_KNOTS((3,3),(1.83251318936898,1.88838849290275),
 .UNSPECIFIED.)
CURVE()
GEOMETRIC_REPRESENTATION_ITEM()
RATIONAL_B_SPLINE_CURVE((1.0210352520228,1.01948527150204,1.01782121322851))
REPRESENTATION_ITEM('')
);
#283=(
BOUNDED_CURVE()
B_SPLINE_CURVE(3,(#202672,#202673,#202674,#202675),.UNSPECIFIED.,.F.,.F.)
B_SPLINE_CURVE_WITH_KNOTS((4,4),(0.,1.),.UNSPECIFIED.)
CURVE()
GEOMETRIC_REPRESENTATION_ITEM()
RATIONAL_B_SPLINE_CURVE((1.,0.999950233831979,0.999950233831979,1.))
REPRESENTATION_ITEM('')
);
#284=(
BOUNDED_CURVE()
B_SPLINE_CURVE(2,(#202874,#202875,#202876),.UNSPECIFIED.,.F.,.F.)
B_SPLINE_CURVE_WITH_KNOTS((3,3),(0.258374009629112,0.314252994430812),
 .UNSPECIFIED.)
CURVE()
GEOMETRIC_REPRESENTATION_ITEM()
RATIONAL_B_SPLINE_CURVE((1.01780198438066,1.01946342992694,1.02101086260943))
REPRESENTATION_ITEM('')
);
#285=(
BOUNDED_CURVE()
B_SPLINE_CURVE(3,(#204498,#204499,#204500,#204501),.UNSPECIFIED.,.F.,.F.)
B_SPLINE_CURVE_WITH_KNOTS((4,4),(2.23546644900558E-8,1.),.UNSPECIFIED.)
CURVE()
GEOMETRIC_REPRESENTATION_ITEM()
RATIONAL_B_SPLINE_CURVE((0.920333502417578,0.739444838137175,0.739437306037566,
0.920310906118751))
REPRESENTATION_ITEM('')
);
#286=(
BOUNDED_CURVE()
B_SPLINE_CURVE(2,(#206522,#206523,#206524),.UNSPECIFIED.,.F.,.F.)
B_SPLINE_CURVE_WITH_KNOTS((3,3),(1.29259901751537,1.31106753021298),
 .UNSPECIFIED.)
CURVE()
GEOMETRIC_REPRESENTATION_ITEM()
RATIONAL_B_SPLINE_CURVE((1.00761504825178,1.00750055077412,1.00738122687679))
REPRESENTATION_ITEM('')
);
#287=(
BOUNDED_CURVE()
B_SPLINE_CURVE(2,(#206938,#206939,#206940),.UNSPECIFIED.,.F.,.F.)
B_SPLINE_CURVE_WITH_KNOTS((3,3),(-1.31112865028128,-1.29265994261521),
 .UNSPECIFIED.)
CURVE()
GEOMETRIC_REPRESENTATION_ITEM()
RATIONAL_B_SPLINE_CURVE((1.00738370644014,1.0075030215545,1.00761751023148))
REPRESENTATION_ITEM('')
);
#288=(
BOUNDED_CURVE()
B_SPLINE_CURVE(3,(#208538,#208539,#208540,#208541,#208542,#208543,#208544,
#208545,#208546),.UNSPECIFIED.,.F.,.F.)
B_SPLINE_CURVE_WITH_KNOTS((4,1,1,1,1,1,4),(0.,0.123263236361637,0.340652780704508,
0.559386011346436,0.77899357693738,0.999563163548804,1.),.UNSPECIFIED.)
CURVE()
GEOMETRIC_REPRESENTATION_ITEM()
RATIONAL_B_SPLINE_CURVE((1.17698506300537,1.17698506300537,1.17698506300537,
1.17698506300537,1.17698506300537,1.17698506300537,1.17698506300537,1.17698506300537,
1.17698506300537))
REPRESENTATION_ITEM('')
);
#289=(
BOUNDED_CURVE()
B_SPLINE_CURVE(3,(#210200,#210201,#210202,#210203),.UNSPECIFIED.,.F.,.F.)
B_SPLINE_CURVE_WITH_KNOTS((4,4),(2.21731723186607E-8,0.0779180439260059),
 .UNSPECIFIED.)
CURVE()
GEOMETRIC_REPRESENTATION_ITEM()
RATIONAL_B_SPLINE_CURVE((0.920333506178196,0.906239547539051,0.893243675215364,
0.881345889207134))
REPRESENTATION_ITEM('')
);
#290=(
BOUNDED_CURVE()
B_SPLINE_CURVE(3,(#213820,#213821,#213822,#213823,#213824,#213825,#213826,
#213827,#213828,#213829),.UNSPECIFIED.,.F.,.F.)
B_SPLINE_CURVE_WITH_KNOTS((4,1,1,1,1,1,1,4),(8.10316778409396E-6,0.0338838605552509,
0.160734011597843,0.302564464117606,0.46206346766159,0.642209475894302,
0.847321328018665,1.),.UNSPECIFIED.)
CURVE()
GEOMETRIC_REPRESENTATION_ITEM()
RATIONAL_B_SPLINE_CURVE((1.18561679635086,1.18561679635086,1.18561679635086,
1.18561679635086,1.18561679635086,1.18561679635086,1.18561679635086,1.18561679635086,
1.18561679635086,1.18561679635086))
REPRESENTATION_ITEM('')
);
#291=(
BOUNDED_CURVE()
B_SPLINE_CURVE(3,(#218961,#218962,#218963,#218964,#218965,#218966,#218967,
#218968,#218969,#218970),.UNSPECIFIED.,.F.,.F.)
B_SPLINE_CURVE_WITH_KNOTS((4,1,1,1,1,1,1,4),(0.,0.0339151346436668,0.160761179432936,
0.302587040773281,0.462080881190981,0.642221057935604,0.847326270405087,
1.),.UNSPECIFIED.)
CURVE()
GEOMETRIC_REPRESENTATION_ITEM()
RATIONAL_B_SPLINE_CURVE((1.23785515024759,1.23785515024759,1.23785515024759,
1.23785515024759,1.23785515024759,1.23785515024759,1.23785515024759,1.23785515024759,
1.23785515024759,1.23785515024759))
REPRESENTATION_ITEM('')
);
#292=(
BOUNDED_CURVE()
B_SPLINE_CURVE(3,(#219485,#219486,#219487,#219488,#219489,#219490,#219491,
#219492,#219493,#219494,#219495,#219496,#219497,#219498,#219499,#219500),
 .UNSPECIFIED.,.F.,.F.)
B_SPLINE_CURVE_WITH_KNOTS((4,1,1,1,1,1,1,1,1,1,1,1,1,4),(9.39006620638716E-8,
0.080008719585417,0.157354301305244,0.233175053797667,0.30943723770927,
0.386891500278141,0.466157449334835,0.547520260308996,0.63051266105066,
0.714225255049488,0.797852066576693,0.881059657512508,0.963911916383926,
1.),.UNSPECIFIED.)
CURVE()
GEOMETRIC_REPRESENTATION_ITEM()
RATIONAL_B_SPLINE_CURVE((1.16662363835811,1.16662363835811,1.16662363835811,
1.16662363835811,1.16662363835811,1.16662363835811,1.16662363835811,1.16662363835811,
1.16662363835811,1.16662363835811,1.16662363835811,1.16662363835811,1.16662363835811,
1.16662363835811,1.16662363835811,1.16662363835811))
REPRESENTATION_ITEM('')
);
#293=(
BOUNDED_CURVE()
B_SPLINE_CURVE(3,(#222591,#222592,#222593,#222594,#222595,#222596,#222597,
#222598,#222599,#222600,#222601,#222602,#222603,#222604),.UNSPECIFIED.,
 .F.,.F.)
B_SPLINE_CURVE_WITH_KNOTS((4,1,1,1,1,1,1,1,1,1,1,4),(0.,0.137572868601569,
0.263117562133764,0.378317465870817,0.484759031341798,0.583344503833418,
0.674182524928913,0.757636022693781,0.834303682974664,0.904798855476626,
0.969143136491548,1.),.UNSPECIFIED.)
CURVE()
GEOMETRIC_REPRESENTATION_ITEM()
RATIONAL_B_SPLINE_CURVE((1.03087613993092,1.03087613993092,1.03087613993092,
1.03087613993092,1.03087613993092,1.03087613993092,1.03087613993092,1.03087613993092,
1.03087613993092,1.03087613993092,1.03087613993092,1.03087613993092,1.03087613993092,
1.03087613993092))
REPRESENTATION_ITEM('')
);
#294=(
BOUNDED_CURVE()
B_SPLINE_CURVE(2,(#224503,#224504,#224505),.UNSPECIFIED.,.F.,.F.)
B_SPLINE_CURVE_WITH_KNOTS((3,3),(1.64652156869494,1.70857608999113),
 .UNSPECIFIED.)
CURVE()
GEOMETRIC_REPRESENTATION_ITEM()
RATIONAL_B_SPLINE_CURVE((1.12272145481139,1.12397656200379,1.12515196069553))
REPRESENTATION_ITEM('')
);
#295=(
BOUNDED_CURVE()
B_SPLINE_CURVE(3,(#224659,#224660,#224661,#224662,#224663,#224664),
 .UNSPECIFIED.,.F.,.F.)
B_SPLINE_CURVE_WITH_KNOTS((4,1,1,4),(9.19528373952134E-8,0.287757885599463,
0.684726967482076,1.),.UNSPECIFIED.)
CURVE()
GEOMETRIC_REPRESENTATION_ITEM()
RATIONAL_B_SPLINE_CURVE((1.17158150172076,1.17158150172076,1.17158150172076,
1.17158150172076,1.17158150172076,1.17158150172076))
REPRESENTATION_ITEM('')
);
#296=(
BOUNDED_CURVE()
B_SPLINE_CURVE(2,(#226550,#226551,#226552),.UNSPECIFIED.,.F.,.F.)
B_SPLINE_CURVE_WITH_KNOTS((3,3),(0.495019376687515,0.77772853407191),
 .UNSPECIFIED.)
CURVE()
GEOMETRIC_REPRESENTATION_ITEM()
RATIONAL_B_SPLINE_CURVE((1.00084152458938,1.00086277332842,1.0006338180829))
REPRESENTATION_ITEM('')
);
#297=(
BOUNDED_CURVE()
B_SPLINE_CURVE(2,(#226688,#226689,#226690),.UNSPECIFIED.,.F.,.F.)
B_SPLINE_CURVE_WITH_KNOTS((3,3),(-0.568099485274466,-0.284581713164912),
 .UNSPECIFIED.)
CURVE()
GEOMETRIC_REPRESENTATION_ITEM()
RATIONAL_B_SPLINE_CURVE((1.00087243021765,1.00086583512503,1.00064853140127))
REPRESENTATION_ITEM('')
);
#298=(
BOUNDED_CURVE()
B_SPLINE_CURVE(2,(#227698,#227699,#227700),.UNSPECIFIED.,.F.,.F.)
B_SPLINE_CURVE_WITH_KNOTS((3,3),(-1.67119225455482,-1.60753914074259),
 .UNSPECIFIED.)
CURVE()
GEOMETRIC_REPRESENTATION_ITEM()
RATIONAL_B_SPLINE_CURVE((1.10597829448455,1.10500348505281,1.10394918772034))
REPRESENTATION_ITEM('')
);
#299=(
BOUNDED_CURVE()
B_SPLINE_CURVE(3,(#227728,#227729,#227730,#227731,#227732,#227733),
 .UNSPECIFIED.,.F.,.F.)
B_SPLINE_CURVE_WITH_KNOTS((4,1,1,4),(0.,0.248178663906444,0.68327556958742,
1.),.UNSPECIFIED.)
CURVE()
GEOMETRIC_REPRESENTATION_ITEM()
RATIONAL_B_SPLINE_CURVE((1.17158482990328,1.17158482990328,1.17158482990328,
1.17158482990328,1.17158482990328,1.17158482990328))
REPRESENTATION_ITEM('')
);
#300=(
BOUNDED_CURVE()
B_SPLINE_CURVE(3,(#229293,#229294,#229295,#229296,#229297,#229298,#229299,
#229300,#229301,#229302,#229303,#229304,#229305,#229306,#229307,#229308),
 .UNSPECIFIED.,.F.,.F.)
B_SPLINE_CURVE_WITH_KNOTS((4,1,1,1,1,1,1,1,1,1,1,1,1,4),(0.,0.0652195770677889,
0.144132039453918,0.222381136331327,0.300500632490316,0.38057108801301,
0.458670302972032,0.537092860050938,0.614733772331346,0.692927540488995,
0.773619678766033,0.851583542722405,0.929001881409716,1.),.UNSPECIFIED.)
CURVE()
GEOMETRIC_REPRESENTATION_ITEM()
RATIONAL_B_SPLINE_CURVE((1.1715738995301,1.1715738995301,1.1715738995301,
1.1715738995301,1.1715738995301,1.1715738995301,1.1715738995301,1.1715738995301,
1.1715738995301,1.1715738995301,1.1715738995301,1.1715738995301,1.1715738995301,
1.1715738995301,1.1715738995301,1.1715738995301))
REPRESENTATION_ITEM('')
);
#301=SHAPE_REPRESENTATION_RELATIONSHIP('SRR','None',#256398,#320);
#302=SHAPE_REPRESENTATION_RELATIONSHIP('SRR','None',#256399,#321);
#303=SHAPE_REPRESENTATION_RELATIONSHIP('SRR','None',#256400,#322);
#304=SHAPE_REPRESENTATION_RELATIONSHIP('SRR','None',#256403,#323);
#305=SHAPE_REPRESENTATION_RELATIONSHIP('SRR','None',#256410,#324);
#306=SHAPE_REPRESENTATION_RELATIONSHIP('SRR','None',#256411,#325);
#307=SHAPE_REPRESENTATION_RELATIONSHIP('SRR','None',#256412,#326);
#308=SHAPE_REPRESENTATION_RELATIONSHIP('SRR','None',#256413,#327);
#309=SHAPE_REPRESENTATION_RELATIONSHIP('SRR','None',#256416,#328);
#310=SHAPE_REPRESENTATION_RELATIONSHIP('SRR','None',#256417,#329);
#311=SHAPE_REPRESENTATION_RELATIONSHIP('SRR','None',#256419,#330);
#312=SHAPE_REPRESENTATION_RELATIONSHIP('SRR','None',#256420,#331);
#313=SHAPE_REPRESENTATION_RELATIONSHIP('SRR','None',#256421,#332);
#314=SHAPE_REPRESENTATION_RELATIONSHIP('SRR','None',#256422,#333);
#315=SHAPE_REPRESENTATION_RELATIONSHIP('SRR','None',#256424,#334);
#316=SHAPE_REPRESENTATION_RELATIONSHIP('SRR','None',#256427,#335);
#317=SHAPE_REPRESENTATION_RELATIONSHIP('SRR','None',#256428,#336);
#318=SHAPE_REPRESENTATION_RELATIONSHIP('SRR','None',#256429,#337);
#319=SHAPE_REPRESENTATION_RELATIONSHIP('SRR','None',#256430,#338);
#320=ADVANCED_BREP_SHAPE_REPRESENTATION('',(#365),#256246);
#321=ADVANCED_BREP_SHAPE_REPRESENTATION('',(#366),#256247);
#322=ADVANCED_BREP_SHAPE_REPRESENTATION('',(#367),#256248);
#323=ADVANCED_BREP_SHAPE_REPRESENTATION('',(#368),#256251);
#324=ADVANCED_BREP_SHAPE_REPRESENTATION('',(#369),#256258);
#325=ADVANCED_BREP_SHAPE_REPRESENTATION('',(#370),#256259);
#326=ADVANCED_BREP_SHAPE_REPRESENTATION('',(#371),#256260);
#327=ADVANCED_BREP_SHAPE_REPRESENTATION('',(#372,#373,#374,#375),#256261);
#328=ADVANCED_BREP_SHAPE_REPRESENTATION('',(#376),#256264);
#329=ADVANCED_BREP_SHAPE_REPRESENTATION('',(#377),#256265);
#330=ADVANCED_BREP_SHAPE_REPRESENTATION('',(#378,#379,#380),#256267);
#331=ADVANCED_BREP_SHAPE_REPRESENTATION('',(#381),#256268);
#332=ADVANCED_BREP_SHAPE_REPRESENTATION('',(#382),#256269);
#333=ADVANCED_BREP_SHAPE_REPRESENTATION('',(#383),#256270);
#334=ADVANCED_BREP_SHAPE_REPRESENTATION('',(#384),#256272);
#335=ADVANCED_BREP_SHAPE_REPRESENTATION('',(#385),#256275);
#336=ADVANCED_BREP_SHAPE_REPRESENTATION('',(#386),#256276);
#337=ADVANCED_BREP_SHAPE_REPRESENTATION('',(#387),#256277);
#338=ADVANCED_BREP_SHAPE_REPRESENTATION('',(#388),#256278);
#339=STYLED_ITEM('',(#256576),#365);
#340=STYLED_ITEM('',(#256576),#366);
#341=STYLED_ITEM('',(#256577),#367);
#342=STYLED_ITEM('',(#256575),#368);
#343=STYLED_ITEM('',(#256578),#369);
#344=STYLED_ITEM('',(#256575),#370);
#345=STYLED_ITEM('',(#256575),#371);
#346=STYLED_ITEM('',(#256575),#372);
#347=STYLED_ITEM('',(#256575),#373);
#348=STYLED_ITEM('',(#256575),#374);
#349=STYLED_ITEM('',(#256575),#375);
#350=STYLED_ITEM('',(#256575),#376);
#351=STYLED_ITEM('',(#256575),#377);
#352=STYLED_ITEM('',(#256580),#73033);
#353=STYLED_ITEM('',(#256575),#378);
#354=STYLED_ITEM('',(#256580),#73361);
#355=STYLED_ITEM('',(#256575),#379);
#356=STYLED_ITEM('',(#256575),#380);
#357=STYLED_ITEM('',(#256575),#381);
#358=STYLED_ITEM('',(#256581),#382);
#359=STYLED_ITEM('',(#256575),#383);
#360=STYLED_ITEM('',(#256582),#384);
#361=STYLED_ITEM('',(#256575),#385);
#362=STYLED_ITEM('',(#256575),#386);
#363=STYLED_ITEM('',(#256583),#387);
#364=STYLED_ITEM('',(#256575),#388);
#365=MANIFOLD_SOLID_BREP('bottom',#73882);
#366=MANIFOLD_SOLID_BREP('Top',#73883);
#367=MANIFOLD_SOLID_BREP('Body1',#73884);
#368=MANIFOLD_SOLID_BREP('molded strap loop',#73885);
#369=MANIFOLD_SOLID_BREP('Body1',#73886);
#370=MANIFOLD_SOLID_BREP('Body1',#73887);
#371=MANIFOLD_SOLID_BREP('Body1',#73888);
#372=MANIFOLD_SOLID_BREP('Body1',#73889);
#373=MANIFOLD_SOLID_BREP('Body5',#73890);
#374=MANIFOLD_SOLID_BREP('Body6',#73891);
#375=MANIFOLD_SOLID_BREP('Body8',#73892);
#376=MANIFOLD_SOLID_BREP('wide',#73893);
#377=MANIFOLD_SOLID_BREP('Body1',#73894);
#378=MANIFOLD_SOLID_BREP('Body2',#73895);
#379=MANIFOLD_SOLID_BREP('Body3',#73896);
#380=MANIFOLD_SOLID_BREP('Body8',#73897);
#381=MANIFOLD_SOLID_BREP('sleeve (2) (3)',#73898);
#382=MANIFOLD_SOLID_BREP('Body1',#73899);
#383=MANIFOLD_SOLID_BREP('Body1',#73900);
#384=MANIFOLD_SOLID_BREP('hose',#73901);
#385=MANIFOLD_SOLID_BREP('20 mm hose adapter (1)',#73902);
#386=MANIFOLD_SOLID_BREP('Body1',#73903);
#387=MANIFOLD_SOLID_BREP('Body1',#73904);
#388=MANIFOLD_SOLID_BREP('Body1',#73905);
#389=SPHERICAL_SURFACE('',#74240,1.);
#390=SPHERICAL_SURFACE('',#74249,1.);
#391=SPHERICAL_SURFACE('',#74252,1.);
#392=SPHERICAL_SURFACE('',#74255,1.);
#393=SPHERICAL_SURFACE('',#74258,1.);
#394=SPHERICAL_SURFACE('',#74261,1.);
#395=SPHERICAL_SURFACE('',#74270,1.);
#396=SPHERICAL_SURFACE('',#74274,1.);
#397=SPHERICAL_SURFACE('',#74277,1.);
#398=SPHERICAL_SURFACE('',#74282,1.);
#399=SPHERICAL_SURFACE('',#74296,1.);
#400=SPHERICAL_SURFACE('',#74302,1.);
#401=SPHERICAL_SURFACE('',#74529,8.5);
#402=SPHERICAL_SURFACE('',#74544,8.5);
#403=SPHERICAL_SURFACE('',#74549,8.5);
#404=SPHERICAL_SURFACE('',#74551,8.5);
#405=SPHERICAL_SURFACE('',#74638,2.);
#406=SPHERICAL_SURFACE('',#74642,2.);
#407=SPHERICAL_SURFACE('',#74745,2.);
#408=SPHERICAL_SURFACE('',#74755,2.);
#409=SPHERICAL_SURFACE('',#74859,2.);
#410=SPHERICAL_SURFACE('',#74866,2.);
#411=SPHERICAL_SURFACE('',#74900,2.);
#412=SPHERICAL_SURFACE('',#74907,2.);
#413=SPHERICAL_SURFACE('',#74997,1.5);
#414=SPHERICAL_SURFACE('',#75000,1.5);
#415=SPHERICAL_SURFACE('',#75025,1.5);
#416=SPHERICAL_SURFACE('',#75043,1.5);
#417=SPHERICAL_SURFACE('',#78311,7.2031775791209);
#418=SPHERICAL_SURFACE('',#78336,7.20317757912094);
#419=SPHERICAL_SURFACE('',#78376,0.5);
#420=SPHERICAL_SURFACE('',#78387,0.5);
#421=SPHERICAL_SURFACE('',#78389,0.5);
#422=SPHERICAL_SURFACE('',#78397,0.5);
#423=SPHERICAL_SURFACE('',#78412,0.5);
#424=SPHERICAL_SURFACE('',#78423,0.5);
#425=SPHERICAL_SURFACE('',#78425,0.5);
#426=SPHERICAL_SURFACE('',#78428,0.5);
#427=SPHERICAL_SURFACE('',#78443,0.5);
#428=SPHERICAL_SURFACE('',#78448,0.5);
#429=SPHERICAL_SURFACE('',#78461,0.5);
#430=SPHERICAL_SURFACE('',#78467,0.5);
#431=SPHERICAL_SURFACE('',#78617,3.04499999999999);
#432=SPHERICAL_SURFACE('',#79529,0.500000000011232);
#433=SPHERICAL_SURFACE('',#79533,0.499999999997093);
#434=SPHERICAL_SURFACE('',#79540,0.500000000003246);
#435=SPHERICAL_SURFACE('',#79543,0.500000000001571);
#436=SPHERICAL_SURFACE('',#79549,0.499999999997562);
#437=SPHERICAL_SURFACE('',#79577,0.499999999968437);
#438=SPHERICAL_SURFACE('',#79584,0.49999999999993);
#439=SPHERICAL_SURFACE('',#79585,0.499999999990065);
#440=SPHERICAL_SURFACE('',#79592,0.500000000024612);
#441=SPHERICAL_SURFACE('',#79672,0.499999999985431);
#442=SPHERICAL_SURFACE('',#79681,0.499999999999755);
#443=SPHERICAL_SURFACE('',#79685,0.499999999989415);
#444=SPHERICAL_SURFACE('',#79690,0.499999999999449);
#445=SPHERICAL_SURFACE('',#79693,0.500000000028029);
#446=SPHERICAL_SURFACE('',#80270,0.499999999999995);
#447=SPHERICAL_SURFACE('',#80271,0.499999999985778);
#448=SPHERICAL_SURFACE('',#80282,0.499999999997702);
#449=SPHERICAL_SURFACE('',#80293,0.499999999986238);
#450=SPHERICAL_SURFACE('',#80307,0.499999999980507);
#451=SPHERICAL_SURFACE('',#80341,0.500000000000566);
#452=SPHERICAL_SURFACE('',#80342,0.499999999999648);
#453=SPHERICAL_SURFACE('',#80344,0.499999999994993);
#454=SPHERICAL_SURFACE('',#80461,0.499999999998139);
#455=SPHERICAL_SURFACE('',#80815,0.500000000007259);
#456=SPHERICAL_SURFACE('',#81474,2.54);
#457=SPHERICAL_SURFACE('',#81481,2.54);
#458=SPHERICAL_SURFACE('',#81514,2.54);
#459=SPHERICAL_SURFACE('',#81532,2.54);
#460=SPHERICAL_SURFACE('',#81545,0.3048);
#461=SPHERICAL_SURFACE('',#81551,0.3048);
#462=SPHERICAL_SURFACE('',#81570,0.3048);
#463=(
BOUNDED_SURFACE()
B_SPLINE_SURFACE(3,2,((#102438,#102439,#102440),(#102441,#102442,#102443),
(#102444,#102445,#102446),(#102447,#102448,#102449),(#102450,#102451,#102452),
(#102453,#102454,#102455)),.UNSPECIFIED.,.F.,.F.,.F.)
B_SPLINE_SURFACE_WITH_KNOTS((4,2,4),(3,3),(-1.50457755258121E-5,0.230791255966689,
0.461597557708898),(0.,1.00001504577553),.UNSPECIFIED.)
GEOMETRIC_REPRESENTATION_ITEM()
RATIONAL_B_SPLINE_SURFACE(((1.,0.730811960977589,1.00000810028562),(1.,
0.730812298859668,1.00000810027545),(1.,0.730604093419736,1.00000810654068),
(1.,0.729782413285562,1.00000813126631),(1.,0.729168950224482,1.00000814972636),
(1.,0.728366726129508,1.00000817386653)))
REPRESENTATION_ITEM('')
SURFACE()
);
#464=(
BOUNDED_SURFACE()
B_SPLINE_SURFACE(3,2,((#102480,#102481,#102482),(#102483,#102484,#102485),
(#102486,#102487,#102488),(#102489,#102490,#102491),(#102492,#102493,#102494),
(#102495,#102496,#102497),(#102498,#102499,#102500),(#102501,#102502,#102503),
(#102504,#102505,#102506),(#102507,#102508,#102509)),.UNSPECIFIED.,.F.,
 .F.,.F.)
B_SPLINE_SURFACE_WITH_KNOTS((4,2,2,2,4),(3,3),(4.90351861573206,5.24843528859394,
5.59335196145582,5.9382686343177,6.28318530717959),(0.,1.),
 .UNSPECIFIED.)
GEOMETRIC_REPRESENTATION_ITEM()
RATIONAL_B_SPLINE_SURFACE(((1.,0.704100791083085,1.),(1.,0.702310498946652,
1.),(1.,0.700574535163478,1.),(1.,0.697416763591127,1.),(1.,0.695996145802689,
1.),(1.,0.693644595630379,1.),(1.,0.692714363052768,1.),(1.,0.691460071435484,
1.),(1.,0.691135157154419,1.),(1.,0.691136406812905,1.)))
REPRESENTATION_ITEM('')
SURFACE()
);
#465=(
BOUNDED_SURFACE()
B_SPLINE_SURFACE(3,2,((#102558,#102559,#102560),(#102561,#102562,#102563),
(#102564,#102565,#102566),(#102567,#102568,#102569),(#102570,#102571,#102572),
(#102573,#102574,#102575),(#102576,#102577,#102578),(#102579,#102580,#102581),
(#102582,#102583,#102584),(#102585,#102586,#102587)),.UNSPECIFIED.,.F.,
 .F.,.F.)
B_SPLINE_SURFACE_WITH_KNOTS((4,2,2,2,4),(3,3),(4.90351861573206,5.24843528859394,
5.59335196145582,5.9382686343177,6.28318530717959),(0.,1.),
 .UNSPECIFIED.)
GEOMETRIC_REPRESENTATION_ITEM()
RATIONAL_B_SPLINE_SURFACE(((1.,0.704100791083085,1.),(1.,0.702310498946652,
1.),(1.,0.700574535163478,1.),(1.,0.697416763591127,1.),(1.,0.695996145802689,
1.),(1.,0.693644595630379,1.),(1.,0.692714363052768,1.),(1.,0.691460071435484,
1.),(1.,0.691135157154419,1.),(1.,0.691136406812905,1.)))
REPRESENTATION_ITEM('')
SURFACE()
);
#466=(
BOUNDED_SURFACE()
B_SPLINE_SURFACE(3,2,((#102614,#102615,#102616),(#102617,#102618,#102619),
(#102620,#102621,#102622),(#102623,#102624,#102625),(#102626,#102627,#102628),
(#102629,#102630,#102631)),.UNSPECIFIED.,.F.,.F.,.F.)
B_SPLINE_SURFACE_WITH_KNOTS((4,2,4),(3,3),(-1.5045775525584E-5,0.230791255966689,
0.461597557708898),(-1.50457755269057E-5,1.),.UNSPECIFIED.)
GEOMETRIC_REPRESENTATION_ITEM()
RATIONAL_B_SPLINE_SURFACE(((1.00000810028562,0.730811960977589,1.),(1.00000810027545,
0.730812298859667,1.),(1.00000810654068,0.730604093419736,1.),(1.00000813126631,
0.729782413285562,1.),(1.00000814972636,0.729168950224481,1.),(1.00000817386653,
0.728366726129508,1.)))
REPRESENTATION_ITEM('')
SURFACE()
);
#467=(
BOUNDED_SURFACE()
B_SPLINE_SURFACE(3,2,((#102656,#102657,#102658),(#102659,#102660,#102661),
(#102662,#102663,#102664),(#102665,#102666,#102667)),.UNSPECIFIED.,.F.,
 .F.,.F.)
B_SPLINE_SURFACE_WITH_KNOTS((4,4),(3,3),(5.89410704993905,6.28318530717959),
(0.,1.),.UNSPECIFIED.)
GEOMETRIC_REPRESENTATION_ITEM()
RATIONAL_B_SPLINE_SURFACE(((1.,0.724452711435715,1.),(1.,0.725365115957854,
1.),(1.,0.725836944871304,1.),(1.,0.725835792172979,1.)))
REPRESENTATION_ITEM('')
SURFACE()
);
#468=(
BOUNDED_SURFACE()
B_SPLINE_SURFACE(3,2,((#102676,#102677,#102678),(#102679,#102680,#102681),
(#102682,#102683,#102684),(#102685,#102686,#102687)),.UNSPECIFIED.,.F.,
 .F.,.F.)
B_SPLINE_SURFACE_WITH_KNOTS((4,4),(3,3),(5.89410704993905,6.28318530717959),
(0.,1.),.UNSPECIFIED.)
GEOMETRIC_REPRESENTATION_ITEM()
RATIONAL_B_SPLINE_SURFACE(((1.,0.724452711435715,1.),(1.,0.725365115957854,
1.),(1.,0.725836944871304,1.),(1.,0.725835792172979,1.)))
REPRESENTATION_ITEM('')
SURFACE()
);
#469=(
BOUNDED_SURFACE()
B_SPLINE_SURFACE(3,2,((#102722,#102723,#102724),(#102725,#102726,#102727),
(#102728,#102729,#102730),(#102731,#102732,#102733)),.UNSPECIFIED.,.F.,
 .F.,.F.)
B_SPLINE_SURFACE_WITH_KNOTS((4,4),(3,3),(6.21786985677021,6.28318530717959),
(0.,1.),.UNSPECIFIED.)
GEOMETRIC_REPRESENTATION_ITEM()
RATIONAL_B_SPLINE_SURFACE(((1.,0.691420658757825,1.),(1.,0.691398066442896,
1.),(1.,0.691386757861856,1.),(1.,0.691386758782659,1.)))
REPRESENTATION_ITEM('')
SURFACE()
);
#470=(
BOUNDED_SURFACE()
B_SPLINE_SURFACE(3,2,((#102739,#102740,#102741),(#102742,#102743,#102744),
(#102745,#102746,#102747),(#102748,#102749,#102750)),.UNSPECIFIED.,.F.,
 .F.,.F.)
B_SPLINE_SURFACE_WITH_KNOTS((4,4),(3,3),(6.21786985677021,6.28318530717959),
(0.,1.),.UNSPECIFIED.)
GEOMETRIC_REPRESENTATION_ITEM()
RATIONAL_B_SPLINE_SURFACE(((1.,0.691420658757825,1.),(1.,0.691398066442896,
1.),(1.,0.691386757861856,1.),(1.,0.691386758782659,1.)))
REPRESENTATION_ITEM('')
SURFACE()
);
#471=(
BOUNDED_SURFACE()
B_SPLINE_SURFACE(2,2,((#102756,#102757,#102758,#102759,#102760),(#102761,
#102762,#102763,#102764,#102765),(#102766,#102767,#102768,#102769,#102770)),
 .UNSPECIFIED.,.F.,.F.,.F.)
B_SPLINE_SURFACE_WITH_KNOTS((3,3),(3,2,3),(1.5707963267919,2.57298235332408),
(2.5505209754581E-13,1.15377806469098,2.30755612938148),.UNSPECIFIED.)
GEOMETRIC_REPRESENTATION_ITEM()
RATIONAL_B_SPLINE_SURFACE(((1.,0.838163484216951,1.,0.838163484216951,1.),
(0.877058019306686,0.73511800532251,0.877058019306686,0.73511800532251,
0.877058019306686),(1.,0.838163484216951,1.,0.838163484216951,1.)))
REPRESENTATION_ITEM('')
SURFACE()
);
#472=(
BOUNDED_SURFACE()
B_SPLINE_SURFACE(2,2,((#102776,#102777,#102778,#102779,#102780),(#102781,
#102782,#102783,#102784,#102785),(#102786,#102787,#102788,#102789,#102790)),
 .UNSPECIFIED.,.F.,.F.,.F.)
B_SPLINE_SURFACE_WITH_KNOTS((3,3),(3,2,3),(1.5707963267918,2.57298235332391),
(0.834036524207602,1.98781458889909,3.14159265359021),.UNSPECIFIED.)
GEOMETRIC_REPRESENTATION_ITEM()
RATIONAL_B_SPLINE_SURFACE(((1.,0.838163484216764,1.,0.838163484216764,1.),
(0.877058019306696,0.735118005322354,0.877058019306696,0.735118005322354,
0.877058019306696),(1.,0.838163484216764,1.,0.838163484216764,1.)))
REPRESENTATION_ITEM('')
SURFACE()
);
#473=(
BOUNDED_SURFACE()
B_SPLINE_SURFACE(3,2,((#102796,#102797,#102798),(#102799,#102800,#102801),
(#102802,#102803,#102804),(#102805,#102806,#102807)),.UNSPECIFIED.,.F.,
 .F.,.F.)
B_SPLINE_SURFACE_WITH_KNOTS((4,4),(3,3),(-8.88178419700125E-16,0.483004660960313),
(0.,1.),.UNSPECIFIED.)
GEOMETRIC_REPRESENTATION_ITEM()
RATIONAL_B_SPLINE_SURFACE(((1.,0.725835792172979,1.),(1.,0.725838513314982,
1.),(1.,0.725106951346256,1.),(1.,0.723717809759276,1.)))
REPRESENTATION_ITEM('')
SURFACE()
);
#474=(
BOUNDED_SURFACE()
B_SPLINE_SURFACE(3,2,((#102816,#102817,#102818),(#102819,#102820,#102821),
(#102822,#102823,#102824),(#102825,#102826,#102827)),.UNSPECIFIED.,.F.,
 .F.,.F.)
B_SPLINE_SURFACE_WITH_KNOTS((4,4),(3,3),(-8.88178419700125E-16,0.483004660960313),
(0.,1.),.UNSPECIFIED.)
GEOMETRIC_REPRESENTATION_ITEM()
RATIONAL_B_SPLINE_SURFACE(((1.,0.725835792172979,1.),(1.,0.725838513314982,
1.),(1.,0.725106951346256,1.),(1.,0.723717809759276,1.)))
REPRESENTATION_ITEM('')
SURFACE()
);
#475=(
BOUNDED_SURFACE()
B_SPLINE_SURFACE(2,2,((#102836,#102837,#102838,#102839,#102840),(#102841,
#102842,#102843,#102844,#102845),(#102846,#102847,#102848,#102849,#102850)),
 .UNSPECIFIED.,.F.,.F.,.F.)
B_SPLINE_SURFACE_WITH_KNOTS((3,3),(3,2,3),(1.57079632679484,2.57298235332565),
(-2.30755612936816,-1.15377806468389,2.0309338915932E-13),.UNSPECIFIED.)
GEOMETRIC_REPRESENTATION_ITEM()
RATIONAL_B_SPLINE_SURFACE(((1.,0.838163484218705,1.,0.838163484218705,1.),
(0.877058019307006,0.735118005324317,0.877058019307006,0.735118005324317,
0.877058019307006),(1.,0.838163484218705,1.,0.838163484218705,1.)))
REPRESENTATION_ITEM('')
SURFACE()
);
#476=(
BOUNDED_SURFACE()
B_SPLINE_SURFACE(2,2,((#102856,#102857,#102858,#102859,#102860),(#102861,
#102862,#102863,#102864,#102865),(#102866,#102867,#102868,#102869,#102870)),
 .UNSPECIFIED.,.F.,.F.,.F.)
B_SPLINE_SURFACE_WITH_KNOTS((3,3),(3,2,3),(1.5707963267948,2.57298235332583),
(-3.14159265358955,-1.98781458890568,-0.834036524222019),.UNSPECIFIED.)
GEOMETRIC_REPRESENTATION_ITEM()
RATIONAL_B_SPLINE_SURFACE(((1.,0.838163484218818,1.,0.838163484218818,1.),
(0.877058019306959,0.735118005324376,0.877058019306959,0.735118005324376,
0.877058019306959),(1.,0.838163484218818,1.,0.838163484218818,1.)))
REPRESENTATION_ITEM('')
SURFACE()
);
#477=(
BOUNDED_SURFACE()
B_SPLINE_SURFACE(3,2,((#102961,#102962,#102963),(#102964,#102965,#102966),
(#102967,#102968,#102969),(#102970,#102971,#102972)),.UNSPECIFIED.,.F.,
 .F.,.F.)
B_SPLINE_SURFACE_WITH_KNOTS((4,4),(3,3),(0.,0.0137740546662475),(0.289530421542148,
1.),.UNSPECIFIED.)
GEOMETRIC_REPRESENTATION_ITEM()
RATIONAL_B_SPLINE_SURFACE(((0.903749487273964,0.833781693451469,1.),(0.903749487273964,
0.833781693451469,1.),(0.90374948773015,0.833781694239273,1.),(0.90374948773015,
0.833781694239273,1.)))
REPRESENTATION_ITEM('')
SURFACE()
);
#478=(
BOUNDED_SURFACE()
B_SPLINE_SURFACE(3,2,((#102991,#102992,#102993),(#102994,#102995,#102996),
(#102997,#102998,#102999),(#103000,#103001,#103002)),.UNSPECIFIED.,.F.,
 .F.,.F.)
B_SPLINE_SURFACE_WITH_KNOTS((4,4),(3,3),(0.,0.0137740546662475),(0.,0.710469578457856),
 .UNSPECIFIED.)
GEOMETRIC_REPRESENTATION_ITEM()
RATIONAL_B_SPLINE_SURFACE(((1.,0.833781693451468,0.903749487273965),(1.,
0.833781693451468,0.903749487273965),(1.,0.833781694239272,0.903749487730151),
(1.,0.833781694239272,0.903749487730151)))
REPRESENTATION_ITEM('')
SURFACE()
);
#479=(
BOUNDED_SURFACE()
B_SPLINE_SURFACE(3,2,((#103118,#103119,#103120),(#103121,#103122,#103123),
(#103124,#103125,#103126),(#103127,#103128,#103129)),.UNSPECIFIED.,.F.,
 .F.,.F.)
B_SPLINE_SURFACE_WITH_KNOTS((4,4),(3,3),(-6.66307287122692E-15,0.0137740546668479),
(0.289530421527284,1.),.UNSPECIFIED.)
GEOMETRIC_REPRESENTATION_ITEM()
RATIONAL_B_SPLINE_SURFACE(((0.903749487733026,0.833781694235706,1.),(0.903749487733026,
0.833781694235706,1.),(0.903749487276874,0.833781693447961,1.),(0.903749487276874,
0.833781693447961,1.)))
REPRESENTATION_ITEM('')
SURFACE()
);
#480=(
BOUNDED_SURFACE()
B_SPLINE_SURFACE(3,2,((#103140,#103141,#103142),(#103143,#103144,#103145),
(#103146,#103147,#103148),(#103149,#103150,#103151)),.UNSPECIFIED.,.F.,
 .F.,.F.)
B_SPLINE_SURFACE_WITH_KNOTS((4,4),(3,3),(-6.66307287122692E-15,0.0137740546668479),
(0.,0.710469578472715),.UNSPECIFIED.)
GEOMETRIC_REPRESENTATION_ITEM()
RATIONAL_B_SPLINE_SURFACE(((1.,0.833781694235706,0.903749487733026),(1.,
0.833781694235706,0.903749487733026),(1.,0.833781693447961,0.903749487276874),
(1.,0.833781693447961,0.903749487276874)))
REPRESENTATION_ITEM('')
SURFACE()
);
#481=(
BOUNDED_SURFACE()
B_SPLINE_SURFACE(3,2,((#103366,#103367,#103368),(#103369,#103370,#103371),
(#103372,#103373,#103374),(#103375,#103376,#103377),(#103378,#103379,#103380),
(#103381,#103382,#103383),(#103384,#103385,#103386),(#103387,#103388,#103389),
(#103390,#103391,#103392),(#103393,#103394,#103395),(#103396,#103397,#103398),
(#103399,#103400,#103401),(#103402,#103403,#103404),(#103405,#103406,#103407),
(#103408,#103409,#103410),(#103411,#103412,#103413)),.UNSPECIFIED.,.F.,
 .F.,.F.)
B_SPLINE_SURFACE_WITH_KNOTS((4,2,2,2,2,2,2,4),(3,3),(-4.33680868994202E-19,
0.00158243865080545,0.00237365797620817,0.00316487730161089,0.00395609662701362,
0.00474731595241634,0.00553853527781906,0.00632975460322179),(0.,1.),
 .UNSPECIFIED.)
GEOMETRIC_REPRESENTATION_ITEM()
RATIONAL_B_SPLINE_SURFACE(((1.,0.746684406395951,1.),(1.,0.745099930788107,
1.),(1.,0.742922606920622,1.),(1.,0.738730288472686,1.),(1.,0.737196614319084,
1.),(1.,0.733912694423886,1.),(1.,0.732155004894546,1.),(1.,0.728398480233619,
1.),(1.,0.726408370598435,1.),(1.,0.722318574189953,1.),(1.,0.72020352979035,
1.),(1.,0.71582788620106,1.),(1.,0.713561533687208,1.),(1.,0.709036560124988,
1.),(1.,0.706758708544775,1.),(1.,0.704465068850414,1.)))
REPRESENTATION_ITEM('')
SURFACE()
);
#482=(
BOUNDED_SURFACE()
B_SPLINE_SURFACE(3,2,((#103683,#103684,#103685),(#103686,#103687,#103688),
(#103689,#103690,#103691),(#103692,#103693,#103694),(#103695,#103696,#103697),
(#103698,#103699,#103700),(#103701,#103702,#103703),(#103704,#103705,#103706),
(#103707,#103708,#103709),(#103710,#103711,#103712),(#103713,#103714,#103715),
(#103716,#103717,#103718),(#103719,#103720,#103721),(#103722,#103723,#103724),
(#103725,#103726,#103727),(#103728,#103729,#103730)),.UNSPECIFIED.,.F.,
 .F.,.F.)
B_SPLINE_SURFACE_WITH_KNOTS((4,2,2,2,2,2,2,4),(3,3),(-4.33680868994202E-19,
0.00158243865080545,0.00237365797620817,0.00316487730161089,0.00395609662701362,
0.00474731595241634,0.00553853527781906,0.00632975460322179),(0.,1.),
 .UNSPECIFIED.)
GEOMETRIC_REPRESENTATION_ITEM()
RATIONAL_B_SPLINE_SURFACE(((1.,0.746684406395951,1.),(1.,0.745099930788107,
1.),(1.,0.742922606920622,1.),(1.,0.738730288472686,1.),(1.,0.737196614319084,
1.),(1.,0.733912694423886,1.),(1.,0.732155004894546,1.),(1.,0.728398480233619,
1.),(1.,0.726408370598435,1.),(1.,0.722318574189953,1.),(1.,0.72020352979035,
1.),(1.,0.71582788620106,1.),(1.,0.713561533687208,1.),(1.,0.709036560124988,
1.),(1.,0.706758708544775,1.),(1.,0.704465068850414,1.)))
REPRESENTATION_ITEM('')
SURFACE()
);
#483=(
BOUNDED_SURFACE()
B_SPLINE_SURFACE(3,2,((#103801,#103802,#103803),(#103804,#103805,#103806),
(#103807,#103808,#103809),(#103810,#103811,#103812)),.UNSPECIFIED.,.F.,
 .F.,.F.)
B_SPLINE_SURFACE_WITH_KNOTS((4,4),(3,3),(0.0122099181911325,0.0259915450335461),
(0.,1.),.UNSPECIFIED.)
GEOMETRIC_REPRESENTATION_ITEM()
RATIONAL_B_SPLINE_SURFACE(((1.,0.87705801930703,1.),(1.,0.87705801930703,
1.),(1.,0.877058019307029,1.),(1.,0.877058019307029,1.)))
REPRESENTATION_ITEM('')
SURFACE()
);
#484=(
BOUNDED_SURFACE()
B_SPLINE_SURFACE(2,2,((#103814,#103815,#103816),(#103817,#103818,#103819),
(#103820,#103821,#103822)),.UNSPECIFIED.,.F.,.F.,.F.)
B_SPLINE_SURFACE_WITH_KNOTS((3,3),(3,3),(1.570796326795,2.57298235332603),
(-0.832654477359387,-6.90684727457153E-13),.UNSPECIFIED.)
GEOMETRIC_REPRESENTATION_ITEM()
RATIONAL_B_SPLINE_SURFACE(((1.,0.914580385363827,1.),(0.877058019306958,
0.802140061284193,0.877058019306958),(1.,0.914580385363827,1.)))
REPRESENTATION_ITEM('')
SURFACE()
);
#485=(
BOUNDED_SURFACE()
B_SPLINE_SURFACE(2,2,((#103829,#103830,#103831),(#103832,#103833,#103834),
(#103835,#103836,#103837)),.UNSPECIFIED.,.F.,.F.,.F.)
B_SPLINE_SURFACE_WITH_KNOTS((3,3),(3,3),(1.57079632679468,2.57298235332551),
(-3.14159265358981,-2.3089381762243),.UNSPECIFIED.)
GEOMETRIC_REPRESENTATION_ITEM()
RATIONAL_B_SPLINE_SURFACE(((1.,0.91458038536245,1.),(0.877058019306989,
0.802140061283013,0.877058019306989),(1.,0.91458038536245,1.)))
REPRESENTATION_ITEM('')
SURFACE()
);
#486=(
BOUNDED_SURFACE()
B_SPLINE_SURFACE(3,2,((#103839,#103840,#103841),(#103842,#103843,#103844),
(#103845,#103846,#103847),(#103848,#103849,#103850)),.UNSPECIFIED.,.F.,
 .F.,.F.)
B_SPLINE_SURFACE_WITH_KNOTS((4,4),(3,3),(0.0122099181911325,0.0259915450335461),
(0.,1.),.UNSPECIFIED.)
GEOMETRIC_REPRESENTATION_ITEM()
RATIONAL_B_SPLINE_SURFACE(((1.,0.87705801930703,1.),(1.,0.87705801930703,
1.),(1.,0.877058019307028,1.),(1.,0.877058019307028,1.)))
REPRESENTATION_ITEM('')
SURFACE()
);
#487=(
BOUNDED_SURFACE()
B_SPLINE_SURFACE(3,2,((#103852,#103853,#103854),(#103855,#103856,#103857),
(#103858,#103859,#103860),(#103861,#103862,#103863),(#103864,#103865,#103866),
(#103867,#103868,#103869),(#103870,#103871,#103872),(#103873,#103874,#103875),
(#103876,#103877,#103878),(#103879,#103880,#103881)),.UNSPECIFIED.,.F.,
 .F.,.F.)
B_SPLINE_SURFACE_WITH_KNOTS((4,2,2,2,4),(3,3),(4.98860254404191,5.19149706958625,
5.39439159513059,5.59728612067494,5.80018064621928),(0.,1.),
 .UNSPECIFIED.)
GEOMETRIC_REPRESENTATION_ITEM()
RATIONAL_B_SPLINE_SURFACE(((1.,0.712263299134906,1.),(1.,0.713489230393055,
1.),(1.,0.71467640955324,1.),(1.,0.716926617563443,1.),(1.,0.717989521436024,
1.),(1.,0.719949352042825,1.),(1.,0.720846236970383,1.),(1.,0.72243927931653,
1.),(1.,0.723135537476774,1.),(1.,0.723717809759277,1.)))
REPRESENTATION_ITEM('')
SURFACE()
);
#488=(
BOUNDED_SURFACE()
B_SPLINE_SURFACE(3,2,((#103900,#103901,#103902),(#103903,#103904,#103905),
(#103906,#103907,#103908),(#103909,#103910,#103911),(#103912,#103913,#103914),
(#103915,#103916,#103917)),.UNSPECIFIED.,.F.,.F.,.F.)
B_SPLINE_SURFACE_WITH_KNOTS((4,2,4),(3,3),(2.65858799262948,3.00765384302835,
3.35671969342721),(0.,1.),.UNSPECIFIED.)
GEOMETRIC_REPRESENTATION_ITEM()
RATIONAL_B_SPLINE_SURFACE(((1.,0.72371780975928,1.),(1.,0.724721071784622,
1.),(1.,0.725382871781541,1.),(1.,0.725957514094196,1.),(1.,0.725870308306197,
1.),(1.,0.725409519742701,1.)))
REPRESENTATION_ITEM('')
SURFACE()
);
#489=(
BOUNDED_SURFACE()
B_SPLINE_SURFACE(3,2,((#103930,#103931,#103932),(#103933,#103934,#103935),
(#103936,#103937,#103938),(#103939,#103940,#103941),(#103942,#103943,#103944),
(#103945,#103946,#103947),(#103948,#103949,#103950),(#103951,#103952,#103953),
(#103954,#103955,#103956),(#103957,#103958,#103959)),.UNSPECIFIED.,.F.,
 .F.,.F.)
B_SPLINE_SURFACE_WITH_KNOTS((4,2,2,2,4),(3,3),(3.35671969342722,3.73851046730098,
4.12030124117474,4.5020920150485,4.88388278892226),(0.,1.),
 .UNSPECIFIED.)
GEOMETRIC_REPRESENTATION_ITEM()
RATIONAL_B_SPLINE_SURFACE(((1.,0.725409519742701,1.),(1.,0.724908756613427,
1.),(1.,0.723960081873025,1.),(1.,0.721303390115367,1.),(1.,0.719594245977284,
1.),(1.,0.715644992592537,1.),(1.,0.713405968976936,1.),(1.,0.708708453034959,
1.),(1.,0.706251701530424,1.),(1.,0.703860813670804,1.)))
REPRESENTATION_ITEM('')
SURFACE()
);
#490=(
BOUNDED_SURFACE()
B_SPLINE_SURFACE(3,2,((#103993,#103994,#103995),(#103996,#103997,#103998),
(#103999,#104000,#104001),(#104002,#104003,#104004),(#104005,#104006,#104007),
(#104008,#104009,#104010),(#104011,#104012,#104013),(#104014,#104015,#104016),
(#104017,#104018,#104019),(#104020,#104021,#104022)),.UNSPECIFIED.,.F.,
 .F.,.F.)
B_SPLINE_SURFACE_WITH_KNOTS((4,2,2,2,4),(3,3),(4.54089517184714,4.92268594572089,
5.30447671959465,5.68626749346841,6.06805826734217),(0.,1.),
 .UNSPECIFIED.)
GEOMETRIC_REPRESENTATION_ITEM()
RATIONAL_B_SPLINE_SURFACE(((1.,0.703860813670799,1.),(1.,0.706251701530401,
1.),(1.,0.708708453035001,1.),(1.,0.713405968976893,1.),(1.,0.715644992592847,
1.),(1.,0.719594245976972,1.),(1.,0.721303390115664,1.),(1.,0.723960081872728,
1.),(1.,0.724908756613647,1.),(1.,0.725409519742701,1.)))
REPRESENTATION_ITEM('')
SURFACE()
);
#491=(
BOUNDED_SURFACE()
B_SPLINE_SURFACE(3,2,((#104041,#104042,#104043),(#104044,#104045,#104046),
(#104047,#104048,#104049),(#104050,#104051,#104052)),.UNSPECIFIED.,.F.,
 .F.,.F.)
B_SPLINE_SURFACE_WITH_KNOTS((4,4),(3,3),(6.06805826734217,6.28318530717959),
(0.,1.),.UNSPECIFIED.)
GEOMETRIC_REPRESENTATION_ITEM()
RATIONAL_B_SPLINE_SURFACE(((1.,0.725409519742701,1.),(1.,0.725692795991905,
1.),(1.,0.725835900736422,1.),(1.,0.725835792172979,1.)))
REPRESENTATION_ITEM('')
SURFACE()
);
#492=(
BOUNDED_SURFACE()
B_SPLINE_SURFACE(3,2,((#104058,#104059,#104060),(#104061,#104062,#104063),
(#104064,#104065,#104066),(#104067,#104068,#104069),(#104070,#104071,#104072),
(#104073,#104074,#104075),(#104076,#104077,#104078),(#104079,#104080,#104081),
(#104082,#104083,#104084),(#104085,#104086,#104087)),.UNSPECIFIED.,.F.,
 .F.,.F.)
B_SPLINE_SURFACE_WITH_KNOTS((4,2,2,2,4),(3,3),(3.62459731455011,3.82749184009445,
4.03038636563879,4.23328089118313,4.43617541672747),(0.,1.),
 .UNSPECIFIED.)
GEOMETRIC_REPRESENTATION_ITEM()
RATIONAL_B_SPLINE_SURFACE(((1.,0.723717809759285,1.),(1.,0.723135537475705,
1.),(1.,0.722439279317945,1.),(1.,0.720846236968967,1.),(1.,0.719949352044958,
1.),(1.,0.717989521433896,1.),(1.,0.716926617563443,1.),(1.,0.71467640955324,
1.),(1.,0.713489230393055,1.),(1.,0.712263299134906,1.)))
REPRESENTATION_ITEM('')
SURFACE()
);
#493=(
BOUNDED_SURFACE()
B_SPLINE_SURFACE(3,2,((#104100,#104101,#104102),(#104103,#104104,#104105),
(#104106,#104107,#104108),(#104109,#104110,#104111),(#104112,#104113,#104114),
(#104115,#104116,#104117),(#104118,#104119,#104120),(#104121,#104122,#104123),
(#104124,#104125,#104126),(#104127,#104128,#104129)),.UNSPECIFIED.,.F.,
 .F.,.F.)
B_SPLINE_SURFACE_WITH_KNOTS((4,2,2,2,4),(3,3),(3.62459731455011,3.82749184009445,
4.03038636563879,4.23328089118313,4.43617541672747),(0.,1.),
 .UNSPECIFIED.)
GEOMETRIC_REPRESENTATION_ITEM()
RATIONAL_B_SPLINE_SURFACE(((1.,0.723717809759285,1.),(1.,0.723135537475705,
1.),(1.,0.722439279317945,1.),(1.,0.720846236968967,1.),(1.,0.719949352044958,
1.),(1.,0.717989521433896,1.),(1.,0.716926617563443,1.),(1.,0.71467640955324,
1.),(1.,0.713489230393055,1.),(1.,0.712263299134906,1.)))
REPRESENTATION_ITEM('')
SURFACE()
);
#494=(
BOUNDED_SURFACE()
B_SPLINE_SURFACE(3,2,((#104146,#104147,#104148),(#104149,#104150,#104151),
(#104152,#104153,#104154),(#104155,#104156,#104157)),.UNSPECIFIED.,.F.,
 .F.,.F.)
B_SPLINE_SURFACE_WITH_KNOTS((4,4),(3,3),(6.06805826734217,6.28318530717959),
(0.,1.),.UNSPECIFIED.)
GEOMETRIC_REPRESENTATION_ITEM()
RATIONAL_B_SPLINE_SURFACE(((1.,0.725409519742701,1.),(1.,0.725692795991905,
1.),(1.,0.725835900736422,1.),(1.,0.725835792172979,1.)))
REPRESENTATION_ITEM('')
SURFACE()
);
#495=(
BOUNDED_SURFACE()
B_SPLINE_SURFACE(3,2,((#104165,#104166,#104167),(#104168,#104169,#104170),
(#104171,#104172,#104173),(#104174,#104175,#104176),(#104177,#104178,#104179),
(#104180,#104181,#104182),(#104183,#104184,#104185),(#104186,#104187,#104188),
(#104189,#104190,#104191),(#104192,#104193,#104194)),.UNSPECIFIED.,.F.,
 .F.,.F.)
B_SPLINE_SURFACE_WITH_KNOTS((4,2,2,2,4),(3,3),(4.54089517184714,4.92268594572089,
5.30447671959465,5.68626749346841,6.06805826734217),(0.,1.),
 .UNSPECIFIED.)
GEOMETRIC_REPRESENTATION_ITEM()
RATIONAL_B_SPLINE_SURFACE(((1.,0.703860813670799,1.),(1.,0.706251701530401,
1.),(1.,0.708708453035001,1.),(1.,0.713405968976893,1.),(1.,0.715644992592847,
1.),(1.,0.719594245976972,1.),(1.,0.721303390115664,1.),(1.,0.723960081872728,
1.),(1.,0.724908756613647,1.),(1.,0.725409519742701,1.)))
REPRESENTATION_ITEM('')
SURFACE()
);
#496=(
BOUNDED_SURFACE()
B_SPLINE_SURFACE(3,2,((#104230,#104231,#104232),(#104233,#104234,#104235),
(#104236,#104237,#104238),(#104239,#104240,#104241),(#104242,#104243,#104244),
(#104245,#104246,#104247),(#104248,#104249,#104250),(#104251,#104252,#104253),
(#104254,#104255,#104256),(#104257,#104258,#104259)),.UNSPECIFIED.,.F.,
 .F.,.F.)
B_SPLINE_SURFACE_WITH_KNOTS((4,2,2,2,4),(3,3),(3.35671969342722,3.73851046730098,
4.12030124117474,4.5020920150485,4.88388278892226),(0.,1.),
 .UNSPECIFIED.)
GEOMETRIC_REPRESENTATION_ITEM()
RATIONAL_B_SPLINE_SURFACE(((1.,0.725409519742701,1.),(1.,0.724908756613427,
1.),(1.,0.723960081873025,1.),(1.,0.721303390115367,1.),(1.,0.719594245977284,
1.),(1.,0.715644992592537,1.),(1.,0.713405968976936,1.),(1.,0.708708453034959,
1.),(1.,0.706251701530424,1.),(1.,0.703860813670804,1.)))
REPRESENTATION_ITEM('')
SURFACE()
);
#497=(
BOUNDED_SURFACE()
B_SPLINE_SURFACE(3,2,((#104276,#104277,#104278),(#104279,#104280,#104281),
(#104282,#104283,#104284),(#104285,#104286,#104287),(#104288,#104289,#104290),
(#104291,#104292,#104293)),.UNSPECIFIED.,.F.,.F.,.F.)
B_SPLINE_SURFACE_WITH_KNOTS((4,2,4),(3,3),(2.65858799262948,3.00765384302835,
3.35671969342721),(0.,1.),.UNSPECIFIED.)
GEOMETRIC_REPRESENTATION_ITEM()
RATIONAL_B_SPLINE_SURFACE(((1.,0.72371780975928,1.),(1.,0.724721071784622,
1.),(1.,0.725382871781541,1.),(1.,0.725957514094196,1.),(1.,0.725870308306197,
1.),(1.,0.725409519742701,1.)))
REPRESENTATION_ITEM('')
SURFACE()
);
#498=(
BOUNDED_SURFACE()
B_SPLINE_SURFACE(3,2,((#104306,#104307,#104308),(#104309,#104310,#104311),
(#104312,#104313,#104314),(#104315,#104316,#104317),(#104318,#104319,#104320),
(#104321,#104322,#104323),(#104324,#104325,#104326),(#104327,#104328,#104329),
(#104330,#104331,#104332),(#104333,#104334,#104335)),.UNSPECIFIED.,.F.,
 .F.,.F.)
B_SPLINE_SURFACE_WITH_KNOTS((4,2,2,2,4),(3,3),(4.98860254404191,5.19149706958625,
5.39439159513059,5.59728612067494,5.80018064621928),(0.,1.),
 .UNSPECIFIED.)
GEOMETRIC_REPRESENTATION_ITEM()
RATIONAL_B_SPLINE_SURFACE(((1.,0.712263299134906,1.),(1.,0.713489230393055,
1.),(1.,0.71467640955324,1.),(1.,0.716926617563443,1.),(1.,0.717989521436024,
1.),(1.,0.719949352042825,1.),(1.,0.720846236970383,1.),(1.,0.72243927931653,
1.),(1.,0.723135537476774,1.),(1.,0.723717809759277,1.)))
REPRESENTATION_ITEM('')
SURFACE()
);
#499=(
BOUNDED_SURFACE()
B_SPLINE_SURFACE(2,2,((#104812,#104813,#104814),(#104815,#104816,#104817),
(#104818,#104819,#104820)),.UNSPECIFIED.,.F.,.F.,.F.)
B_SPLINE_SURFACE_WITH_KNOTS((3,3),(3,3),(1.57079632679509,2.57298235332628),
(1.37744717431051E-12,0.832654477258829),.UNSPECIFIED.)
GEOMETRIC_REPRESENTATION_ITEM()
RATIONAL_B_SPLINE_SURFACE(((1.,0.914580385384299,1.),(0.877058019306904,
0.802140061302098,0.877058019306904),(1.,0.914580385384299,1.)))
REPRESENTATION_ITEM('')
SURFACE()
);
#500=(
BOUNDED_SURFACE()
B_SPLINE_SURFACE(3,2,((#104822,#104823,#104824),(#104825,#104826,#104827),
(#104828,#104829,#104830),(#104831,#104832,#104833)),.UNSPECIFIED.,.F.,
 .F.,.F.)
B_SPLINE_SURFACE_WITH_KNOTS((4,4),(3,3),(0.0122276627477264,0.0260092895913993),
(0.,1.),.UNSPECIFIED.)
GEOMETRIC_REPRESENTATION_ITEM()
RATIONAL_B_SPLINE_SURFACE(((1.,0.877058019307031,1.),(1.,0.877058019307031,
1.),(1.,0.87705801930703,1.),(1.,0.87705801930703,1.)))
REPRESENTATION_ITEM('')
SURFACE()
);
#501=(
BOUNDED_SURFACE()
B_SPLINE_SURFACE(3,2,((#104834,#104835,#104836),(#104837,#104838,#104839),
(#104840,#104841,#104842),(#104843,#104844,#104845)),.UNSPECIFIED.,.F.,
 .F.,.F.)
B_SPLINE_SURFACE_WITH_KNOTS((4,4),(3,3),(0.0122276627477264,0.0260092895913993),
(0.,1.),.UNSPECIFIED.)
GEOMETRIC_REPRESENTATION_ITEM()
RATIONAL_B_SPLINE_SURFACE(((1.,0.877058019307031,1.),(1.,0.877058019307031,
1.),(1.,0.87705801930703,1.),(1.,0.87705801930703,1.)))
REPRESENTATION_ITEM('')
SURFACE()
);
#502=(
BOUNDED_SURFACE()
B_SPLINE_SURFACE(2,2,((#104847,#104848,#104849),(#104850,#104851,#104852),
(#104853,#104854,#104855)),.UNSPECIFIED.,.F.,.F.,.F.)
B_SPLINE_SURFACE_WITH_KNOTS((3,3),(3,3),(1.57079632679493,2.57298235332573),
(2.30893817632947,3.1415926535898),.UNSPECIFIED.)
GEOMETRIC_REPRESENTATION_ITEM()
RATIONAL_B_SPLINE_SURFACE(((1.,0.914580385383716,1.),(0.877058019306993,
0.802140061301669,0.877058019306993),(1.,0.914580385383716,1.)))
REPRESENTATION_ITEM('')
SURFACE()
);
#503=(
BOUNDED_SURFACE()
B_SPLINE_SURFACE(3,2,((#105025,#105026,#105027),(#105028,#105029,#105030),
(#105031,#105032,#105033),(#105034,#105035,#105036),(#105037,#105038,#105039),
(#105040,#105041,#105042),(#105043,#105044,#105045),(#105046,#105047,#105048),
(#105049,#105050,#105051),(#105052,#105053,#105054)),.UNSPECIFIED.,.F.,
 .F.,.F.)
B_SPLINE_SURFACE_WITH_KNOTS((4,2,2,2,4),(3,3),(0.0161072408648997,0.0171592456632661,
0.0182112504616325,0.0192632552599989,0.0203152600583653),(0.,1.),
 .UNSPECIFIED.)
GEOMETRIC_REPRESENTATION_ITEM()
RATIONAL_B_SPLINE_SURFACE(((1.,0.701461183863016,1.),(1.,0.701674419204018,
1.),(1.,0.701929398666152,1.),(1.,0.702509802555299,1.),(1.,0.702840058742502,
1.),(1.,0.703551091031343,1.),(1.,0.703931826159223,1.),(1.,0.704743975671051,
1.),(1.,0.705174890722056,1.),(1.,0.705606516333739,1.)))
REPRESENTATION_ITEM('')
SURFACE()
);
#504=(
BOUNDED_SURFACE()
B_SPLINE_SURFACE(3,2,((#105126,#105127,#105128),(#105129,#105130,#105131),
(#105132,#105133,#105134),(#105135,#105136,#105137),(#105138,#105139,#105140),
(#105141,#105142,#105143),(#105144,#105145,#105146),(#105147,#105148,#105149)),
 .UNSPECIFIED.,.F.,.F.,.F.)
B_SPLINE_SURFACE_WITH_KNOTS((4,2,2,4),(3,3),(-2.79691254402821E-5,0.00196208232835213,
0.0029431234925282,0.00395213378214451),(-3.78492287566262E-5,1.00001427373041),
 .UNSPECIFIED.)
GEOMETRIC_REPRESENTATION_ITEM()
RATIONAL_B_SPLINE_SURFACE(((1.00001066525585,0.859106665503948,1.00000402199472),
(1.00001063035669,0.859567700770931,1.00000400883382),(1.00001104622383,
0.854073889036005,1.00000416566227),(1.00001224939159,0.838179444551389,
1.00000461939112),(1.00001274239202,0.831666663626559,1.00000480530745),
(1.00001388112375,0.816623451083527,1.00000523473671),(1.00001453368767,
0.808002757147825,1.00000548082632),(1.00001524218174,0.798643198196412,
1.00000574800785)))
REPRESENTATION_ITEM('')
SURFACE()
);
#505=(
BOUNDED_SURFACE()
B_SPLINE_SURFACE(3,2,((#105178,#105179,#105180),(#105181,#105182,#105183),
(#105184,#105185,#105186),(#105187,#105188,#105189)),.UNSPECIFIED.,.F.,
 .F.,.F.)
B_SPLINE_SURFACE_WITH_KNOTS((4,4),(3,3),(-6.32927599887088E-5,0.478455403056012),
(-6.32927599878206E-5,1.),.UNSPECIFIED.)
GEOMETRIC_REPRESENTATION_ITEM()
RATIONAL_B_SPLINE_SURFACE(((1.00003906844007,0.691367226852426,1.),(1.00003906878658,
0.691364489511508,1.),(1.00003899046734,0.691983195620926,1.),(1.00003884272184,
0.693150355175121,1.)))
REPRESENTATION_ITEM('')
SURFACE()
);
#506=(
BOUNDED_SURFACE()
B_SPLINE_SURFACE(3,2,((#105210,#105211,#105212),(#105213,#105214,#105215),
(#105216,#105217,#105218),(#105219,#105220,#105221),(#105222,#105223,#105224),
(#105225,#105226,#105227),(#105228,#105229,#105230),(#105231,#105232,#105233),
(#105234,#105235,#105236),(#105237,#105238,#105239),(#105240,#105241,#105242),
(#105243,#105244,#105245),(#105246,#105247,#105248),(#105249,#105250,#105251)),
 .UNSPECIFIED.,.F.,.F.,.F.)
B_SPLINE_SURFACE_WITH_KNOTS((4,2,2,2,2,2,4),(3,3),(0.,0.00051658813173536,
0.00103317626347072,0.00154976439520608,0.00206635252694144,0.00309952879041216,
0.00413270505388288),(0.,1.),.UNSPECIFIED.)
GEOMETRIC_REPRESENTATION_ITEM()
RATIONAL_B_SPLINE_SURFACE(((1.,0.974425202479568,1.),(1.,0.974061144139192,
1.),(1.,0.970011698104601,1.),(1.,0.95787089434471,1.),(1.,0.949705923167431,
1.),(1.,0.931201530990331,1.),(1.,0.92078868679879,1.),(1.,0.897949982127795,
1.),(1.,0.885559295126697,1.),(1.,0.846517396069995,1.),(1.,0.8175739188407,
1.),(1.,0.755665740954751,1.),(1.,0.723842332342889,1.),(1.,0.693169312231045,
1.)))
REPRESENTATION_ITEM('')
SURFACE()
);
#507=(
BOUNDED_SURFACE()
B_SPLINE_SURFACE(3,2,((#105340,#105341,#105342),(#105343,#105344,#105345),
(#105346,#105347,#105348),(#105349,#105350,#105351),(#105352,#105353,#105354),
(#105355,#105356,#105357),(#105358,#105359,#105360),(#105361,#105362,#105363),
(#105364,#105365,#105366),(#105367,#105368,#105369),(#105370,#105371,#105372),
(#105373,#105374,#105375),(#105376,#105377,#105378),(#105379,#105380,#105381)),
 .UNSPECIFIED.,.F.,.F.,.F.)
B_SPLINE_SURFACE_WITH_KNOTS((4,2,2,2,2,2,4),(3,3),(-1.33573707650214E-16,
0.000959870308724801,0.00191974061744974,0.0023996757718122,0.00287961092617467,
0.00335954608053714,0.00383948123489961),(0.,1.),.UNSPECIFIED.)
GEOMETRIC_REPRESENTATION_ITEM()
RATIONAL_B_SPLINE_SURFACE(((1.,0.799430267248701,1.),(1.,0.814117521361254,
1.),(1.,0.829999898740665,1.),(1.,0.864324871046763,1.),(1.,0.882034819889797,
1.),(1.,0.908173740609288,1.),(1.,0.916720952838839,1.),(1.,0.932957435084628,
1.),(1.,0.940765138314623,1.),(1.,0.954949716209312,1.),(1.,0.961326658398916,
1.),(1.,0.97100743195555,1.),(1.,0.974250988319983,1.),(1.,0.974425202479568,
1.)))
REPRESENTATION_ITEM('')
SURFACE()
);
#508=(
BOUNDED_SURFACE()
B_SPLINE_SURFACE(2,3,((#105467,#105468,#105469,#105470,#105471,#105472,
#105473,#105474),(#105475,#105476,#105477,#105478,#105479,#105480,#105481,
#105482),(#105483,#105484,#105485,#105486,#105487,#105488,#105489,#105490)),
 .UNSPECIFIED.,.F.,.F.,.F.)
B_SPLINE_SURFACE_WITH_KNOTS((3,3),(4,2,2,4),(-0.000130989733376058,1.),
(0.000391522782999316,0.00395192104326111,0.00738140724084689,0.0142403796360185),
 .UNSPECIFIED.)
GEOMETRIC_REPRESENTATION_ITEM()
RATIONAL_B_SPLINE_SURFACE(((1.00001650298547,1.00001503255661,1.00001408495403,
1.00001267030605,1.00001219240127,1.00001110849567,1.00001083866905,1.00001085784781),
(0.937006568951554,0.942619332735898,0.946236419975191,0.951636262925703,
0.953460469936437,0.957597838463137,0.95862779178567,0.958554584649297),
(1.,1.,1.,1.,1.,1.,1.,1.)))
REPRESENTATION_ITEM('')
SURFACE()
);
#509=(
BOUNDED_SURFACE()
B_SPLINE_SURFACE(2,3,((#105768,#105769,#105770,#105771,#105772,#105773,
#105774,#105775),(#105776,#105777,#105778,#105779,#105780,#105781,#105782,
#105783),(#105784,#105785,#105786,#105787,#105788,#105789,#105790,#105791)),
 .UNSPECIFIED.,.F.,.F.,.F.)
B_SPLINE_SURFACE_WITH_KNOTS((3,3),(4,2,2,4),(-0.000137904460115146,1.),
(-0.0142403796360184,-0.00738140724084689,-0.0039519210432611,-0.000386725963715403),
 .UNSPECIFIED.)
GEOMETRIC_REPRESENTATION_ITEM()
RATIONAL_B_SPLINE_SURFACE(((1.00001143109429,1.00001141090297,1.00001169497524,
1.00001283610628,1.00001333924232,1.00001482959954,1.00001582889789,1.00001738053029),
(0.958554298103111,0.958627505745529,0.957597545302306,0.953460148170388,
0.95163592854773,0.946232342586752,0.942609187986725,0.936983436667272),
(1.,1.,1.,1.,1.,1.,1.,1.)))
REPRESENTATION_ITEM('')
SURFACE()
);
#510=(
BOUNDED_SURFACE()
B_SPLINE_SURFACE(3,2,((#105873,#105874,#105875),(#105876,#105877,#105878),
(#105879,#105880,#105881),(#105882,#105883,#105884),(#105885,#105886,#105887),
(#105888,#105889,#105890),(#105891,#105892,#105893),(#105894,#105895,#105896),
(#105897,#105898,#105899),(#105900,#105901,#105902),(#105903,#105904,#105905),
(#105906,#105907,#105908),(#105909,#105910,#105911),(#105912,#105913,#105914),
(#105915,#105916,#105917),(#105918,#105919,#105920),(#105921,#105922,#105923),
(#105924,#105925,#105926),(#105927,#105928,#105929),(#105930,#105931,#105932),
(#105933,#105934,#105935),(#105936,#105937,#105938),(#105939,#105940,#105941),
(#105942,#105943,#105944),(#105945,#105946,#105947),(#105948,#105949,#105950),
(#105951,#105952,#105953),(#105954,#105955,#105956),(#105957,#105958,#105959),
(#105960,#105961,#105962),(#105963,#105964,#105965),(#105966,#105967,#105968),
(#105969,#105970,#105971),(#105972,#105973,#105974),(#105975,#105976,#105977),
(#105978,#105979,#105980),(#105981,#105982,#105983),(#105984,#105985,#105986),
(#105987,#105988,#105989),(#105990,#105991,#105992),(#105993,#105994,#105995),
(#105996,#105997,#105998),(#105999,#106000,#106001),(#106002,#106003,#106004)),
 .UNSPECIFIED.,.F.,.F.,.F.)
B_SPLINE_SURFACE_WITH_KNOTS((4,2,2,2,2,2,2,2,2,2,2,2,2,2,2,2,2,2,2,2,2,
4),(3,3),(0.00683077446829113,0.00932718446209479,0.0105589430344424,0.0117907016067901,
0.0142542187514854,0.0167177358961807,0.0179494944685283,0.019181253040876,
0.0216447701855713,0.0228765287579189,0.0241082873302666,0.0265718044749619,
0.0290353216196571,0.0302670801920048,0.0314988387643524,0.0339623559090477,
0.036425873053743,0.0388893901984383,0.040121148770786,0.0413529073431336,
0.0438164244878289,0.0463128344816325),(0.,0.817139609422989),
 .UNSPECIFIED.)
GEOMETRIC_REPRESENTATION_ITEM()
RATIONAL_B_SPLINE_SURFACE(((1.,0.949174694364094,0.981412129520444),(1.,
0.945554937770958,0.980088309311615),(1.,0.941898576710491,0.978751102088401),
(1.,0.936395960731321,0.976738681074107),(1.,0.934577203948765,0.976073523922862),
(1.,0.931004902148136,0.974767058917818),(1.,0.929242236985068,0.974122415637468),
(1.,0.9240292586997,0.972215921146804),(1.,0.92065297082173,0.970981142506672),
(1.,0.914143333303444,0.968600432788455),(1.,0.911114963613866,0.967492895059959),
(1.,0.906929799257329,0.965962293482229),(1.,0.9055944864815,0.965473941850768),
(1.,0.903050361967492,0.964543502646151),(1.,0.901835488788049,0.964099198277963),
(1.,0.89845087243363,0.962861373740918),(1.,0.896535899336355,0.962161028283893),
(1.,0.894187002907493,0.96130198804708),(1.,0.893491789019603,0.961047733880932),
(1.,0.892285127104387,0.96060643254271),(1.,0.891776185914921,0.960420302173337),
(1.,0.890559647895769,0.95997538893867),(1.,0.890147747053189,0.959824748240763),
(1.,0.890146931776672,0.959824450077198),(1.,0.890557984923178,0.959974780755034),
(1.,0.891760594890526,0.960414600211716),(1.,0.892259731954465,0.960597145008643),
(1.,0.893456278701626,0.961034747019702),(1.,0.894157743136853,0.961291287140905),
(1.,0.896516197303809,0.96215382284116),(1.,0.898431905497959,0.962854437138388),
(1.,0.902908089067156,0.964491470489903),(1.,0.905496275066061,0.965438023895195),
(1.,0.911093273392862,0.96748496249539),(1.,0.914116110886309,0.968590476984796),
(1.,0.918961079752552,0.970362382783225),(1.,0.920636156688793,0.97097499322884),
(1.,0.924025348678133,0.972214491170662),(1.,0.925744240762664,0.972843125726536),
(1.,0.930966076047343,0.974752859405907),(1.,0.934533541872659,0.976057555794282),
(1.,0.941866281669694,0.978739291120853),(1.,0.945560093775315,0.980090194969556),
(1.,0.949174505199002,0.981412060338839)))
REPRESENTATION_ITEM('')
SURFACE()
);
#511=(
BOUNDED_SURFACE()
B_SPLINE_SURFACE(3,2,((#106228,#106229,#106230),(#106231,#106232,#106233),
(#106234,#106235,#106236),(#106237,#106238,#106239),(#106240,#106241,#106242),
(#106243,#106244,#106245),(#106246,#106247,#106248),(#106249,#106250,#106251),
(#106252,#106253,#106254),(#106255,#106256,#106257)),.UNSPECIFIED.,.F.,
 .F.,.F.)
B_SPLINE_SURFACE_WITH_KNOTS((4,2,2,2,4),(3,3),(0.0161072408648997,0.0171592456632661,
0.0182112504616325,0.0192632552599989,0.0203152600583653),(0.,1.),
 .UNSPECIFIED.)
GEOMETRIC_REPRESENTATION_ITEM()
RATIONAL_B_SPLINE_SURFACE(((1.,0.701461183863016,1.),(1.,0.701674419204018,
1.),(1.,0.701929398666152,1.),(1.,0.702509802555299,1.),(1.,0.702840058742502,
1.),(1.,0.703551091031343,1.),(1.,0.703931826159223,1.),(1.,0.704743975671051,
1.),(1.,0.705174890722056,1.),(1.,0.705606516333739,1.)))
REPRESENTATION_ITEM('')
SURFACE()
);
#512=(
BOUNDED_SURFACE()
B_SPLINE_SURFACE(3,2,((#106492,#106493,#106494),(#106495,#106496,#106497),
(#106498,#106499,#106500),(#106501,#106502,#106503),(#106504,#106505,#106506),
(#106507,#106508,#106509),(#106510,#106511,#106512),(#106513,#106514,#106515),
(#106516,#106517,#106518),(#106519,#106520,#106521),(#106522,#106523,#106524),
(#106525,#106526,#106527),(#106528,#106529,#106530),(#106531,#106532,#106533)),
 .UNSPECIFIED.,.F.,.F.,.F.)
B_SPLINE_SURFACE_WITH_KNOTS((4,2,2,2,2,2,4),(3,3),(0.,0.00051658813173536,
0.00103317626347072,0.00154976439520608,0.00206635252694144,0.00309952879041216,
0.00413270505388288),(0.,1.),.UNSPECIFIED.)
GEOMETRIC_REPRESENTATION_ITEM()
RATIONAL_B_SPLINE_SURFACE(((1.,0.974425202479568,1.),(1.,0.974061144139192,
1.),(1.,0.970011698104601,1.),(1.,0.95787089434471,1.),(1.,0.949705923167431,
1.),(1.,0.931201530990331,1.),(1.,0.92078868679879,1.),(1.,0.897949982127795,
1.),(1.,0.885559295126697,1.),(1.,0.846517396069995,1.),(1.,0.8175739188407,
1.),(1.,0.755665740954751,1.),(1.,0.723842332342889,1.),(1.,0.693169312231045,
1.)))
REPRESENTATION_ITEM('')
SURFACE()
);
#513=(
BOUNDED_SURFACE()
B_SPLINE_SURFACE(3,2,((#106618,#106619,#106620),(#106621,#106622,#106623),
(#106624,#106625,#106626),(#106627,#106628,#106629)),.UNSPECIFIED.,.F.,
 .F.,.F.)
B_SPLINE_SURFACE_WITH_KNOTS((4,4),(3,3),(-6.32927599801398E-5,0.478455403056004),
(0.,1.00006329275998),.UNSPECIFIED.)
GEOMETRIC_REPRESENTATION_ITEM()
RATIONAL_B_SPLINE_SURFACE(((1.,0.691367226852429,1.00003906844006),(1.,
0.691364489511511,1.00003906878657),(1.,0.691983195620929,1.00003899046734),
(1.,0.693150355175124,1.00003884272184)))
REPRESENTATION_ITEM('')
SURFACE()
);
#514=(
BOUNDED_SURFACE()
B_SPLINE_SURFACE(3,2,((#106648,#106649,#106650),(#106651,#106652,#106653),
(#106654,#106655,#106656),(#106657,#106658,#106659),(#106660,#106661,#106662),
(#106663,#106664,#106665),(#106666,#106667,#106668),(#106669,#106670,#106671)),
 .UNSPECIFIED.,.F.,.F.,.F.)
B_SPLINE_SURFACE_WITH_KNOTS((4,2,2,4),(3,3),(-2.79691254314206E-5,0.00196208232835213,
0.0029431234925282,0.00395213378213596),(-1.42737303930705E-5,1.00003784922879),
 .UNSPECIFIED.)
GEOMETRIC_REPRESENTATION_ITEM()
RATIONAL_B_SPLINE_SURFACE(((1.00000402199471,0.859106665503954,1.00001066525586),
(1.00000400883382,0.859567700770881,1.0000106303567),(1.00000416566227,
0.854073889035956,1.00001104622384),(1.00000461939112,0.838179444551388,
1.0000122493916),(1.00000480530744,0.831666663626558,1.00001274239203),
(1.0000052347367,0.81662345108359,1.00001388112377),(1.00000548082631,0.808002757147969,
1.00001453368768),(1.00000574800784,0.798643198196649,1.00001524218175)))
REPRESENTATION_ITEM('')
SURFACE()
);
#515=(
BOUNDED_SURFACE()
B_SPLINE_SURFACE(3,2,((#106700,#106701,#106702),(#106703,#106704,#106705),
(#106706,#106707,#106708),(#106709,#106710,#106711),(#106712,#106713,#106714),
(#106715,#106716,#106717),(#106718,#106719,#106720),(#106721,#106722,#106723),
(#106724,#106725,#106726),(#106727,#106728,#106729),(#106730,#106731,#106732),
(#106733,#106734,#106735),(#106736,#106737,#106738),(#106739,#106740,#106741)),
 .UNSPECIFIED.,.F.,.F.,.F.)
B_SPLINE_SURFACE_WITH_KNOTS((4,2,2,2,2,2,4),(3,3),(-1.33573707650214E-16,
0.000959870308724801,0.00191974061744974,0.0023996757718122,0.00287961092617467,
0.00335954608053714,0.00383948123489961),(0.,1.),.UNSPECIFIED.)
GEOMETRIC_REPRESENTATION_ITEM()
RATIONAL_B_SPLINE_SURFACE(((1.,0.799430267248701,1.),(1.,0.814117521361254,
1.),(1.,0.829999898740665,1.),(1.,0.864324871046763,1.),(1.,0.882034819889797,
1.),(1.,0.908173740609288,1.),(1.,0.916720952838839,1.),(1.,0.932957435084628,
1.),(1.,0.940765138314623,1.),(1.,0.954949716209312,1.),(1.,0.961326658398916,
1.),(1.,0.97100743195555,1.),(1.,0.974250988319983,1.),(1.,0.974425202479568,
1.)))
REPRESENTATION_ITEM('')
SURFACE()
);
#516=(
BOUNDED_SURFACE()
B_SPLINE_SURFACE(3,2,((#106893,#106894,#106895),(#106896,#106897,#106898),
(#106899,#106900,#106901),(#106902,#106903,#106904),(#106905,#106906,#106907),
(#106908,#106909,#106910),(#106911,#106912,#106913),(#106914,#106915,#106916),
(#106917,#106918,#106919),(#106920,#106921,#106922),(#106923,#106924,#106925),
(#106926,#106927,#106928),(#106929,#106930,#106931),(#106932,#106933,#106934),
(#106935,#106936,#106937),(#106938,#106939,#106940)),.UNSPECIFIED.,.F.,
 .F.,.F.)
B_SPLINE_SURFACE_WITH_KNOTS((4,2,2,2,2,2,2,4),(3,3),(-1.36880524276295E-17,
0.000497107304866793,0.0009942146097336,0.00149132191460041,0.00198842921946721,
0.00248553652433402,0.00298264382920083,0.00397685843893444),(0.,1.),
 .UNSPECIFIED.)
GEOMETRIC_REPRESENTATION_ITEM()
RATIONAL_B_SPLINE_SURFACE(((1.,0.974376913992991,1.),(1.,0.974934475769935,
1.),(1.,0.971984431235992,1.),(1.,0.961849378102014,1.),(1.,0.954638192136785,
1.),(1.,0.938106245405382,1.),(1.,0.928639623823563,1.),(1.,0.907931328084382,
1.),(1.,0.896835714362629,1.),(1.,0.873357621991533,1.),(1.,0.860971701791459,
1.),(1.,0.835027099645861,1.),(1.,0.821419142121514,1.),(1.,0.78028869096048,
1.),(1.,0.752078329613009,1.),(1.,0.72445271143572,1.)))
REPRESENTATION_ITEM('')
SURFACE()
);
#517=(
BOUNDED_SURFACE()
B_SPLINE_SURFACE(3,2,((#107019,#107020,#107021),(#107022,#107023,#107024),
(#107025,#107026,#107027),(#107028,#107029,#107030),(#107031,#107032,#107033),
(#107034,#107035,#107036)),.UNSPECIFIED.,.F.,.F.,.F.)
B_SPLINE_SURFACE_WITH_KNOTS((4,2,4),(3,3),(2.9788254913122,3.25474820107126,
3.53067091083032),(0.,1.),.UNSPECIFIED.)
GEOMETRIC_REPRESENTATION_ITEM()
RATIONAL_B_SPLINE_SURFACE(((1.,0.725591396825809,1.),(1.,0.725867547899905,
1.),(1.,0.725909577319914,1.),(1.,0.725525524594422,1.),(1.,0.725099454978545,
1.),(1.,0.72445271143572,1.)))
REPRESENTATION_ITEM('')
SURFACE()
);
#518=(
BOUNDED_SURFACE()
B_SPLINE_SURFACE(3,2,((#107040,#107041,#107042),(#107043,#107044,#107045),
(#107046,#107047,#107048),(#107049,#107050,#107051),(#107052,#107053,#107054),
(#107055,#107056,#107057)),.UNSPECIFIED.,.F.,.F.,.F.)
B_SPLINE_SURFACE_WITH_KNOTS((4,2,4),(3,3),(2.9788254913122,3.25474820107126,
3.53067091083032),(0.,1.),.UNSPECIFIED.)
GEOMETRIC_REPRESENTATION_ITEM()
RATIONAL_B_SPLINE_SURFACE(((1.,0.725591396825809,1.),(1.,0.725867547899905,
1.),(1.,0.725909577319914,1.),(1.,0.725525524594422,1.),(1.,0.725099454978545,
1.),(1.,0.72445271143572,1.)))
REPRESENTATION_ITEM('')
SURFACE()
);
#519=(
BOUNDED_SURFACE()
B_SPLINE_SURFACE(3,2,((#107063,#107064,#107065),(#107066,#107067,#107068),
(#107069,#107070,#107071),(#107072,#107073,#107074),(#107075,#107076,#107077),
(#107078,#107079,#107080),(#107081,#107082,#107083),(#107084,#107085,#107086),
(#107087,#107088,#107089),(#107090,#107091,#107092),(#107093,#107094,#107095),
(#107096,#107097,#107098),(#107099,#107100,#107101),(#107102,#107103,#107104),
(#107105,#107106,#107107),(#107108,#107109,#107110)),.UNSPECIFIED.,.F.,
 .F.,.F.)
B_SPLINE_SURFACE_WITH_KNOTS((4,2,2,2,2,2,2,4),(3,3),(-1.36880524276295E-17,
0.000497107304866793,0.0009942146097336,0.00149132191460041,0.00198842921946721,
0.00248553652433402,0.00298264382920083,0.00397685843893444),(0.,1.),
 .UNSPECIFIED.)
GEOMETRIC_REPRESENTATION_ITEM()
RATIONAL_B_SPLINE_SURFACE(((1.,0.974376913992991,1.),(1.,0.974934475769935,
1.),(1.,0.971984431235992,1.),(1.,0.961849378102014,1.),(1.,0.954638192136785,
1.),(1.,0.938106245405382,1.),(1.,0.928639623823563,1.),(1.,0.907931328084382,
1.),(1.,0.896835714362629,1.),(1.,0.873357621991533,1.),(1.,0.860971701791459,
1.),(1.,0.835027099645861,1.),(1.,0.821419142121514,1.),(1.,0.78028869096048,
1.),(1.,0.752078329613009,1.),(1.,0.72445271143572,1.)))
REPRESENTATION_ITEM('')
SURFACE()
);
#520=(
BOUNDED_SURFACE()
B_SPLINE_SURFACE(3,2,((#107196,#107197,#107198),(#107199,#107200,#107201),
(#107202,#107203,#107204),(#107205,#107206,#107207),(#107208,#107209,#107210),
(#107211,#107212,#107213),(#107214,#107215,#107216),(#107217,#107218,#107219),
(#107220,#107221,#107222),(#107223,#107224,#107225),(#107226,#107227,#107228),
(#107229,#107230,#107231),(#107232,#107233,#107234),(#107235,#107236,#107237)),
 .UNSPECIFIED.,.F.,.F.,.F.)
B_SPLINE_SURFACE_WITH_KNOTS((4,2,2,2,2,2,4),(3,3),(0.,0.000985874100108087,
0.00197174820021617,0.00246468525027022,0.00295762230032426,0.0034505593503783,
0.00394349640043235),(0.,1.),.UNSPECIFIED.)
GEOMETRIC_REPRESENTATION_ITEM()
RATIONAL_B_SPLINE_SURFACE(((1.,0.724452711435715,1.),(1.,0.751991263337759,
1.),(1.,0.780293389629672,1.),(1.,0.835572620392792,1.),(1.,0.861590892318827,
1.),(1.,0.896992314725805,1.),(1.,0.908196952685271,1.),(1.,0.928727298136893,
1.),(1.,0.938167717018336,1.),(1.,0.954774506329152,1.),(1.,0.961875273780819,
1.),(1.,0.972019647976016,1.),(1.,0.974891310777299,1.),(1.,0.974376913992992,
1.)))
REPRESENTATION_ITEM('')
SURFACE()
);
#521=(
BOUNDED_SURFACE()
B_SPLINE_SURFACE(3,2,((#107311,#107312,#107313),(#107314,#107315,#107316),
(#107317,#107318,#107319),(#107320,#107321,#107322)),.UNSPECIFIED.,.F.,
 .F.,.F.)
B_SPLINE_SURFACE_WITH_KNOTS((4,4),(3,3),(4.95635278850516E-16,0.162767162277596),
(0.,1.),.UNSPECIFIED.)
GEOMETRIC_REPRESENTATION_ITEM()
RATIONAL_B_SPLINE_SURFACE(((1.,0.725835792172979,1.),(1.,0.725835827801289,
1.),(1.,0.725754030142037,1.),(1.,0.725591396825804,1.)))
REPRESENTATION_ITEM('')
SURFACE()
);
#522=(
BOUNDED_SURFACE()
B_SPLINE_SURFACE(3,2,((#107326,#107327,#107328),(#107329,#107330,#107331),
(#107332,#107333,#107334),(#107335,#107336,#107337)),.UNSPECIFIED.,.F.,
 .F.,.F.)
B_SPLINE_SURFACE_WITH_KNOTS((4,4),(3,3),(4.95635278850516E-16,0.162767162277596),
(0.,1.),.UNSPECIFIED.)
GEOMETRIC_REPRESENTATION_ITEM()
RATIONAL_B_SPLINE_SURFACE(((1.,0.725835792172979,1.),(1.,0.725835827801289,
1.),(1.,0.725754030142037,1.),(1.,0.725591396825804,1.)))
REPRESENTATION_ITEM('')
SURFACE()
);
#523=(
BOUNDED_SURFACE()
B_SPLINE_SURFACE(3,2,((#107341,#107342,#107343),(#107344,#107345,#107346),
(#107347,#107348,#107349),(#107350,#107351,#107352),(#107353,#107354,#107355),
(#107356,#107357,#107358),(#107359,#107360,#107361),(#107362,#107363,#107364),
(#107365,#107366,#107367),(#107368,#107369,#107370),(#107371,#107372,#107373),
(#107374,#107375,#107376),(#107377,#107378,#107379),(#107380,#107381,#107382)),
 .UNSPECIFIED.,.F.,.F.,.F.)
B_SPLINE_SURFACE_WITH_KNOTS((4,2,2,2,2,2,4),(3,3),(0.,0.000985874100108087,
0.00197174820021617,0.00246468525027022,0.00295762230032426,0.0034505593503783,
0.00394349640043235),(0.,1.),.UNSPECIFIED.)
GEOMETRIC_REPRESENTATION_ITEM()
RATIONAL_B_SPLINE_SURFACE(((1.,0.724452711435715,1.),(1.,0.751991263337759,
1.),(1.,0.780293389629672,1.),(1.,0.835572620392792,1.),(1.,0.861590892318827,
1.),(1.,0.896992314725805,1.),(1.,0.908196952685271,1.),(1.,0.928727298136893,
1.),(1.,0.938167717018336,1.),(1.,0.954774506329152,1.),(1.,0.961875273780819,
1.),(1.,0.972019647976016,1.),(1.,0.974891310777299,1.),(1.,0.974376913992992,
1.)))
REPRESENTATION_ITEM('')
SURFACE()
);
#524=(
BOUNDED_SURFACE()
B_SPLINE_SURFACE(3,2,((#107460,#107461,#107462),(#107463,#107464,#107465),
(#107466,#107467,#107468),(#107469,#107470,#107471),(#107472,#107473,#107474),
(#107475,#107476,#107477)),.UNSPECIFIED.,.F.,.F.,.F.)
B_SPLINE_SURFACE_WITH_KNOTS((4,2,4),(3,3),(5.8215877494705,6.0523940512129,
6.2832003529553),(-1.50457757196321E-5,1.),.UNSPECIFIED.)
GEOMETRIC_REPRESENTATION_ITEM()
RATIONAL_B_SPLINE_SURFACE(((1.00000817386663,0.728366726129453,1.),(1.00000814972647,
0.729168950224329,1.),(1.00000813126641,0.729782413285645,1.),(1.00000810654078,
0.73060409341955,1.),(1.00000810028491,0.730811988146255,1.),(1.00000810028572,
0.730811961038305,1.)))
REPRESENTATION_ITEM('')
SURFACE()
);
#525=(
BOUNDED_SURFACE()
B_SPLINE_SURFACE(2,2,((#107504,#107505,#107506),(#107507,#107508,#107509),
(#107510,#107511,#107512)),.UNSPECIFIED.,.F.,.F.,.F.)
B_SPLINE_SURFACE_WITH_KNOTS((3,3),(3,3),(-1.57079632679555,-0.0610865238201759),
(-3.14159265358983,-1.66678943564847),.UNSPECIFIED.)
GEOMETRIC_REPRESENTATION_ITEM()
RATIONAL_B_SPLINE_SURFACE(((1.,0.740218127484763,1.),(0.728370969882314,
0.539153395440547,0.728370969882314),(1.,0.740218127484763,1.)))
REPRESENTATION_ITEM('')
SURFACE()
);
#526=(
BOUNDED_SURFACE()
B_SPLINE_SURFACE(3,2,((#107516,#107517,#107518),(#107519,#107520,#107521),
(#107522,#107523,#107524),(#107525,#107526,#107527)),.UNSPECIFIED.,.F.,
 .F.,.F.)
B_SPLINE_SURFACE_WITH_KNOTS((4,4),(3,3),(2.60208521396521E-18,0.0662627890164079),
(0.,1.),.UNSPECIFIED.)
GEOMETRIC_REPRESENTATION_ITEM()
RATIONAL_B_SPLINE_SURFACE(((1.,0.832509039408651,1.),(1.,0.841310991800236,
1.),(1.,0.850167465444484,1.),(1.,0.859129920522142,1.)))
REPRESENTATION_ITEM('')
SURFACE()
);
#527=(
BOUNDED_SURFACE()
B_SPLINE_SURFACE(3,2,((#107537,#107538,#107539),(#107540,#107541,#107542),
(#107543,#107544,#107545),(#107546,#107547,#107548),(#107549,#107550,#107551),
(#107552,#107553,#107554),(#107555,#107556,#107557),(#107558,#107559,#107560),
(#107561,#107562,#107563),(#107564,#107565,#107566),(#107567,#107568,#107569),
(#107570,#107571,#107572),(#107573,#107574,#107575),(#107576,#107577,#107578)),
 .UNSPECIFIED.,.F.,.F.,.F.)
B_SPLINE_SURFACE_WITH_KNOTS((4,2,2,2,2,2,4),(3,3),(-5.09575021068187E-18,
0.000418798639400911,0.000837597278801827,0.00167519455760366,0.00209399319700457,
0.00251279183640549,0.00335038911520732),(0.,1.),.UNSPECIFIED.)
GEOMETRIC_REPRESENTATION_ITEM()
RATIONAL_B_SPLINE_SURFACE(((1.,0.832509039408652,1.),(1.,0.83240130202873,
1.),(1.,0.831692080434241,1.),(1.,0.829051368007843,1.),(1.,0.827087972022128,
1.),(1.,0.819412784139442,1.),(1.,0.811767959045028,1.),(1.,0.796343038541118,
1.),(1.,0.790447389343154,1.),(1.,0.777359023391674,1.),(1.,0.770147364871475,
1.),(1.,0.745972970176443,1.),(1.,0.726852109873052,1.),(1.,0.704100791083894,
1.)))
REPRESENTATION_ITEM('')
SURFACE()
);
#528=(
BOUNDED_SURFACE()
B_SPLINE_SURFACE(3,2,((#107611,#107612,#107613),(#107614,#107615,#107616),
(#107617,#107618,#107619),(#107620,#107621,#107622)),.UNSPECIFIED.,.F.,
 .F.,.F.)
B_SPLINE_SURFACE_WITH_KNOTS((4,4),(3,3),(0.,0.187887697326484),(0.,1.),
 .UNSPECIFIED.)
GEOMETRIC_REPRESENTATION_ITEM()
RATIONAL_B_SPLINE_SURFACE(((1.,0.691136406812905,1.),(1.,0.691136342942116,
1.),(1.,0.691231690462588,1.),(1.,0.691420658757825,1.)))
REPRESENTATION_ITEM('')
SURFACE()
);
#529=(
BOUNDED_SURFACE()
B_SPLINE_SURFACE(2,3,((#107637,#107638,#107639,#107640,#107641,#107642,
#107643,#107644,#107645,#107646,#107647,#107648,#107649,#107650,#107651,
#107652,#107653,#107654,#107655,#107656),(#107657,#107658,#107659,#107660,
#107661,#107662,#107663,#107664,#107665,#107666,#107667,#107668,#107669,
#107670,#107671,#107672,#107673,#107674,#107675,#107676),(#107677,#107678,
#107679,#107680,#107681,#107682,#107683,#107684,#107685,#107686,#107687,
#107688,#107689,#107690,#107691,#107692,#107693,#107694,#107695,#107696)),
 .UNSPECIFIED.,.F.,.F.,.F.)
B_SPLINE_SURFACE_WITH_KNOTS((3,3),(4,2,2,2,2,2,2,2,2,4),(-0.000135176970269171,
1.),(-0.000135176959615847,0.00348062859397991,0.00696125718795983,0.0104418857819397,
0.0121822000789297,0.0130523572274247,0.0134874358016722,0.0137049750887959,
0.0138137447323578,0.0140575175161575),.UNSPECIFIED.)
GEOMETRIC_REPRESENTATION_ITEM()
RATIONAL_B_SPLINE_SURFACE(((1.00001117149249,1.00001015704503,1.00000940603126,
1.00000808068611,1.00000750901156,1.00000626539548,1.00000561215028,1.00000417007858,
1.0000036102326,1.00000249715562,1.00000207892323,1.00000134902995,1.00000108732731,
1.00000067164271,1.00000052811662,1.00000031864702,1.00000024878359,1.0000000538439,
0.999999960354097,1.00000058113605),(0.958678270173485,0.962430564119043,
0.965208455118998,0.970110714508499,0.97222525571465,0.976825211174398,
0.97924147037738,0.984575484367532,0.98664627342703,0.990763383675517,0.992310364604706,
0.995010133965248,0.995978134033495,0.99751569108318,0.998046573237594,
0.998821370919239,0.999079785584174,0.999800839219237,1.00014664444267,
0.997850462048964),(1.,1.,1.,1.,1.,1.,1.,1.,1.,1.,1.,1.,1.,1.,1.,1.,1.,
1.,1.,1.)))
REPRESENTATION_ITEM('')
SURFACE()
);
#530=(
BOUNDED_SURFACE()
B_SPLINE_SURFACE(2,3,((#107868,#107869,#107870,#107871,#107872,#107873,
#107874,#107875,#107876,#107877,#107878,#107879,#107880,#107881,#107882,
#107883,#107884,#107885,#107886,#107887),(#107888,#107889,#107890,#107891,
#107892,#107893,#107894,#107895,#107896,#107897,#107898,#107899,#107900,
#107901,#107902,#107903,#107904,#107905,#107906,#107907),(#107908,#107909,
#107910,#107911,#107912,#107913,#107914,#107915,#107916,#107917,#107918,
#107919,#107920,#107921,#107922,#107923,#107924,#107925,#107926,#107927)),
 .UNSPECIFIED.,.F.,.F.,.F.)
B_SPLINE_SURFACE_WITH_KNOTS((3,3),(4,2,2,2,2,2,2,2,2,4),(0.,1.),(0.,0.000109729844320906,
0.000219459688641811,0.000438919377283623,0.000877838754567245,0.00175567750913449,
0.00351135501826898,0.00702271003653796,0.0105340650548069,0.0140454200730759),
 .UNSPECIFIED.)
GEOMETRIC_REPRESENTATION_ITEM()
RATIONAL_B_SPLINE_SURFACE(((1.,1.,1.,1.,1.,1.,1.,1.,1.,1.,1.,1.,1.,1.,1.,
1.,1.,1.,1.,1.),(0.999657324975727,0.999717493905617,0.999522643707703,
0.999070464541343,0.998813948146736,0.998036042572096,0.997503919051332,
0.995969433225068,0.995004748983325,0.992304358329842,0.990758149230285,
0.986644758300787,0.98457467626182,0.979242486997106,0.976826910502357,
0.972228101226629,0.970113978297922,0.965306066196195,0.962642624580763,
0.959100588261126),(1.,1.,1.,1.,1.,1.,1.,1.,1.,1.,1.,1.,1.,1.,1.,1.,1.,
1.,1.,1.)))
REPRESENTATION_ITEM('')
SURFACE()
);
#531=(
BOUNDED_SURFACE()
B_SPLINE_SURFACE(3,2,((#107971,#107972,#107973),(#107974,#107975,#107976),
(#107977,#107978,#107979),(#107980,#107981,#107982),(#107983,#107984,#107985),
(#107986,#107987,#107988),(#107989,#107990,#107991),(#107992,#107993,#107994),
(#107995,#107996,#107997),(#107998,#107999,#108000),(#108001,#108002,#108003),
(#108004,#108005,#108006),(#108007,#108008,#108009),(#108010,#108011,#108012),
(#108013,#108014,#108015),(#108016,#108017,#108018),(#108019,#108020,#108021),
(#108022,#108023,#108024),(#108025,#108026,#108027),(#108028,#108029,#108030),
(#108031,#108032,#108033),(#108034,#108035,#108036),(#108037,#108038,#108039),
(#108040,#108041,#108042),(#108043,#108044,#108045),(#108046,#108047,#108048),
(#108049,#108050,#108051),(#108052,#108053,#108054),(#108055,#108056,#108057),
(#108058,#108059,#108060),(#108061,#108062,#108063),(#108064,#108065,#108066),
(#108067,#108068,#108069),(#108070,#108071,#108072),(#108073,#108074,#108075),
(#108076,#108077,#108078),(#108079,#108080,#108081),(#108082,#108083,#108084),
(#108085,#108086,#108087),(#108088,#108089,#108090),(#108091,#108092,#108093),
(#108094,#108095,#108096),(#108097,#108098,#108099),(#108100,#108101,#108102),
(#108103,#108104,#108105),(#108106,#108107,#108108),(#108109,#108110,#108111),
(#108112,#108113,#108114),(#108115,#108116,#108117),(#108118,#108119,#108120)),
 .UNSPECIFIED.,.F.,.F.,.F.)
B_SPLINE_SURFACE_WITH_KNOTS((4,2,2,2,2,2,2,2,2,2,2,2,2,2,2,2,2,2,2,2,2,
2,2,2,4),(3,3),(-1.13330446568048E-9,0.00304696334124135,0.00457044557851426,
0.00609392781578717,0.00914089229033298,0.0106643745276059,0.0121878567648788,
0.0152348212394246,0.0167583034766975,0.0182817857139704,0.0198052679512433,
0.0213287501885163,0.0243757146630621,0.025899196900335,0.0274226791376079,
0.0304696436121537,0.0319931258494266,0.0335166080866995,0.0350400903239724,
0.0365635725612453,0.0396105370357911,0.0411340192730641,0.042657501510337,
0.0457044659848828,0.0487514304594286),(0.,1.),.UNSPECIFIED.)
GEOMETRIC_REPRESENTATION_ITEM()
RATIONAL_B_SPLINE_SURFACE(((1.,0.95910060504317,1.),(1.,0.956466363387595,
1.),(1.,0.953904104280601,1.),(1.,0.950152983941249,1.),(1.,0.948918062221464,
1.),(1.,0.946477821782282,1.),(1.,0.94527021579765,1.),(1.,0.94176873399043,
1.),(1.,0.939568108016062,1.),(1.,0.936456301646216,1.),(1.,0.935446381081403,
1.),(1.,0.933512525445083,1.),(1.,0.932593831502409,1.),(1.,0.929976273524672,
1.),(1.,0.928414554057225,1.),(1.,0.926348530792945,1.),(1.,0.925709871881876,
1.),(1.,0.92455194891129,1.),(1.,0.924029117459157,1.),(1.,0.923093685105131,
1.),(1.,0.922681084897534,1.),(1.,0.921967471313838,1.),(1.,0.921665342560623,
1.),(1.,0.9209451144039,1.),(1.,0.920706818195311,1.),(1.,0.920704026348631,
1.),(1.,0.920762647276751,1.),(1.,0.921003173577676,1.),(1.,0.921183688500242,
1.),(1.,0.921897842299975,1.),(1.,0.922603184315874,1.),(1.,0.924012349161723,
1.),(1.,0.924543715407924,1.),(1.,0.925703681149383,1.),(1.,0.926334117542559,
1.),(1.,0.927694705062598,1.),(1.,0.928424856105636,1.),(1.,0.929986765782697,
1.),(1.,0.930821416663629,1.),(1.,0.933466268200976,1.),(1.,0.935380661289521,
1.),(1.,0.938479389104017,1.),(1.,0.939550441117218,1.),(1.,0.941772541139333,
1.),(1.,0.942922700563072,1.),(1.,0.946419497439487,1.),(1.,0.948836430972207,
1.),(1.,0.953857348437485,1.),(1.,0.956474137615393,1.),(1.,0.959100607982882,
1.)))
REPRESENTATION_ITEM('')
SURFACE()
);
#532=(
BOUNDED_SURFACE()
B_SPLINE_SURFACE(3,2,((#108222,#108223,#108224),(#108225,#108226,#108227),
(#108228,#108229,#108230),(#108231,#108232,#108233)),.UNSPECIFIED.,.F.,
 .F.,.F.)
B_SPLINE_SURFACE_WITH_KNOTS((4,4),(3,3),(0.,0.187887697326484),(0.,1.),
 .UNSPECIFIED.)
GEOMETRIC_REPRESENTATION_ITEM()
RATIONAL_B_SPLINE_SURFACE(((1.,0.691136406812905,1.),(1.,0.691136342942116,
1.),(1.,0.691231690462588,1.),(1.,0.691420658757825,1.)))
REPRESENTATION_ITEM('')
SURFACE()
);
#533=(
BOUNDED_SURFACE()
B_SPLINE_SURFACE(3,2,((#108239,#108240,#108241),(#108242,#108243,#108244),
(#108245,#108246,#108247),(#108248,#108249,#108250),(#108251,#108252,#108253),
(#108254,#108255,#108256),(#108257,#108258,#108259),(#108260,#108261,#108262),
(#108263,#108264,#108265),(#108266,#108267,#108268),(#108269,#108270,#108271),
(#108272,#108273,#108274),(#108275,#108276,#108277),(#108278,#108279,#108280)),
 .UNSPECIFIED.,.F.,.F.,.F.)
B_SPLINE_SURFACE_WITH_KNOTS((4,2,2,2,2,2,4),(3,3),(-5.09575021068187E-18,
0.000418798639400911,0.000837597278801827,0.00167519455760366,0.00209399319700457,
0.00251279183640549,0.00335038911520732),(0.,1.),.UNSPECIFIED.)
GEOMETRIC_REPRESENTATION_ITEM()
RATIONAL_B_SPLINE_SURFACE(((1.,0.832509039408652,1.),(1.,0.83240130202873,
1.),(1.,0.831692080434241,1.),(1.,0.829051368007843,1.),(1.,0.827087972022128,
1.),(1.,0.819412784139442,1.),(1.,0.811767959045028,1.),(1.,0.796343038541118,
1.),(1.,0.790447389343154,1.),(1.,0.777359023391674,1.),(1.,0.770147364871475,
1.),(1.,0.745972970176443,1.),(1.,0.726852109873052,1.),(1.,0.704100791083894,
1.)))
REPRESENTATION_ITEM('')
SURFACE()
);
#534=(
BOUNDED_SURFACE()
B_SPLINE_SURFACE(3,2,((#108311,#108312,#108313),(#108314,#108315,#108316),
(#108317,#108318,#108319),(#108320,#108321,#108322)),.UNSPECIFIED.,.F.,
 .F.,.F.)
B_SPLINE_SURFACE_WITH_KNOTS((4,4),(3,3),(2.60208521396521E-18,0.0662627890164079),
(0.,1.),.UNSPECIFIED.)
GEOMETRIC_REPRESENTATION_ITEM()
RATIONAL_B_SPLINE_SURFACE(((1.,0.832509039408651,1.),(1.,0.841310991800236,
1.),(1.,0.850167465444484,1.),(1.,0.859129920522142,1.)))
REPRESENTATION_ITEM('')
SURFACE()
);
#535=(
BOUNDED_SURFACE()
B_SPLINE_SURFACE(2,2,((#108335,#108336,#108337),(#108338,#108339,#108340),
(#108341,#108342,#108343)),.UNSPECIFIED.,.F.,.F.,.F.)
B_SPLINE_SURFACE_WITH_KNOTS((3,3),(3,3),(-1.5707963267943,-0.0610865238189587),
(-1.47480321793498,-1.59630998889929E-13),.UNSPECIFIED.)
GEOMETRIC_REPRESENTATION_ITEM()
RATIONAL_B_SPLINE_SURFACE(((1.,0.740218127486962,1.),(0.728370969882315,
0.539153395442149,0.728370969882315),(1.,0.740218127486962,1.)))
REPRESENTATION_ITEM('')
SURFACE()
);
#536=(
BOUNDED_SURFACE()
B_SPLINE_SURFACE(3,2,((#108351,#108352,#108353),(#108354,#108355,#108356),
(#108357,#108358,#108359),(#108360,#108361,#108362),(#108363,#108364,#108365),
(#108366,#108367,#108368)),.UNSPECIFIED.,.F.,.F.,.F.)
B_SPLINE_SURFACE_WITH_KNOTS((4,2,4),(3,3),(5.8215877494705,6.0523940512129,
6.2832003529553),(0.,1.00001504577572),.UNSPECIFIED.)
GEOMETRIC_REPRESENTATION_ITEM()
RATIONAL_B_SPLINE_SURFACE(((1.,0.728366726129454,1.00000817386663),(1.,
0.729168950224329,1.00000814972647),(1.,0.729782413285645,1.00000813126641),
(1.,0.73060409341955,1.00000810654078),(1.,0.730811988146255,1.00000810028491),
(1.,0.730811961038305,1.00000810028572)))
REPRESENTATION_ITEM('')
SURFACE()
);
#537=(
BOUNDED_SURFACE()
B_SPLINE_SURFACE(3,2,((#108401,#108402,#108403),(#108404,#108405,#108406),
(#108407,#108408,#108409),(#108410,#108411,#108412),(#108413,#108414,#108415),
(#108416,#108417,#108418),(#108419,#108420,#108421),(#108422,#108423,#108424),
(#108425,#108426,#108427),(#108428,#108429,#108430)),.UNSPECIFIED.,.F.,
 .F.,.F.)
B_SPLINE_SURFACE_WITH_KNOTS((4,2,2,2,4),(3,3),(3.29595941387912,3.69094850509142,
4.08593759630372,4.48092668751602,4.87593991425815),(0.,1.00002413552983),
 .UNSPECIFIED.)
GEOMETRIC_REPRESENTATION_ITEM()
RATIONAL_B_SPLINE_SURFACE(((1.,0.725584773828777,1.00001324631375),(1.,
0.725212956132452,1.00001326426179),(1.,0.724356616619883,1.0000133055982),
(1.,0.72180844931395,1.00001342860094),(1.,0.720115265225984,1.00001351033273),
(1.,0.716134412396088,1.00001370249271),(1.,0.71384798508871,1.00001381286098),
(1.,0.709019955574031,1.00001404591508),(1.,0.706480399627612,1.00001416850214),
(1.,0.704007127338806,1.00001428788961)))
REPRESENTATION_ITEM('')
SURFACE()
);
#538=(
BOUNDED_SURFACE()
B_SPLINE_SURFACE(3,2,((#108447,#108448,#108449),(#108450,#108451,#108452),
(#108453,#108454,#108455),(#108456,#108457,#108458),(#108459,#108460,#108461),
(#108462,#108463,#108464),(#108465,#108466,#108467),(#108468,#108469,#108470),
(#108471,#108472,#108473),(#108474,#108475,#108476)),.UNSPECIFIED.,.F.,
 .F.,.F.)
B_SPLINE_SURFACE_WITH_KNOTS((4,2,2,2,4),(3,3),(1.40726952845127,1.80225861966357,
2.19724771087587,2.59223680208817,2.98722589330047),(0.,1.),
 .UNSPECIFIED.)
GEOMETRIC_REPRESENTATION_ITEM()
RATIONAL_B_SPLINE_SURFACE(((1.,0.704014724455969,1.),(1.,0.706487794036354,
1.),(1.,0.709027125860647,1.),(1.,0.713854891352542,1.),(1.,0.716141263477087,
1.),(1.,0.72012202022931,1.),(1.,0.72181516345237,1.),(1.,0.724363269258419,
1.),(1.,0.725219588103281,1.),(1.,0.725591396825804,1.)))
REPRESENTATION_ITEM('')
SURFACE()
);
#539=(
BOUNDED_SURFACE()
B_SPLINE_SURFACE(3,2,((#108495,#108496,#108497),(#108498,#108499,#108500),
(#108501,#108502,#108503),(#108504,#108505,#108506),(#108507,#108508,#108509),
(#108510,#108511,#108512),(#108513,#108514,#108515),(#108516,#108517,#108518),
(#108519,#108520,#108521),(#108522,#108523,#108524)),.UNSPECIFIED.,.F.,
 .F.,.F.)
B_SPLINE_SURFACE_WITH_KNOTS((4,2,2,2,4),(3,3),(1.40726952845127,1.80225861966357,
2.19724771087587,2.59223680208817,2.98722589330047),(0.,1.),
 .UNSPECIFIED.)
GEOMETRIC_REPRESENTATION_ITEM()
RATIONAL_B_SPLINE_SURFACE(((1.,0.704014724455969,1.),(1.,0.706487794036354,
1.),(1.,0.709027125860647,1.),(1.,0.713854891352542,1.),(1.,0.716141263477087,
1.),(1.,0.72012202022931,1.),(1.,0.72181516345237,1.),(1.,0.724363269258419,
1.),(1.,0.725219588103281,1.),(1.,0.725591396825804,1.)))
REPRESENTATION_ITEM('')
SURFACE()
);
#540=(
BOUNDED_SURFACE()
B_SPLINE_SURFACE(3,2,((#108541,#108542,#108543),(#108544,#108545,#108546),
(#108547,#108548,#108549),(#108550,#108551,#108552),(#108553,#108554,#108555),
(#108556,#108557,#108558),(#108559,#108560,#108561),(#108562,#108563,#108564),
(#108565,#108566,#108567),(#108568,#108569,#108570)),.UNSPECIFIED.,.F.,
 .F.,.F.)
B_SPLINE_SURFACE_WITH_KNOTS((4,2,2,2,4),(3,3),(3.29595941387912,3.69094850509142,
4.08593759630372,4.48092668751602,4.87593991425805),(-2.41355298336257E-5,
1.),.UNSPECIFIED.)
GEOMETRIC_REPRESENTATION_ITEM()
RATIONAL_B_SPLINE_SURFACE(((1.00001324631376,0.725584773828776,1.),(1.00001326426179,
0.72521295613245,1.),(1.00001330559821,0.724356616619881,1.),(1.00001342860094,
0.721808449313948,1.),(1.00001351033273,0.720115265225983,1.),(1.00001370249272,
0.716134412396086,1.),(1.00001381286099,0.713847985088708,1.),(1.00001404591509,
0.709019955574029,1.),(1.00001416850214,0.706480399627611,1.),(1.00001428788962,
0.704007127338806,1.)))
REPRESENTATION_ITEM('')
SURFACE()
);
#541=(
BOUNDED_SURFACE()
B_SPLINE_SURFACE(3,2,((#108796,#108797,#108798,#108799,#108800),(#108801,
#108802,#108803,#108804,#108805),(#108806,#108807,#108808,#108809,#108810),
(#108811,#108812,#108813,#108814,#108815),(#108816,#108817,#108818,#108819,
#108820),(#108821,#108822,#108823,#108824,#108825),(#108826,#108827,#108828,
#108829,#108830),(#108831,#108832,#108833,#108834,#108835),(#108836,#108837,
#108838,#108839,#108840),(#108841,#108842,#108843,#108844,#108845)),
 .UNSPECIFIED.,.F.,.F.,.F.)
B_SPLINE_SURFACE_WITH_KNOTS((4,3,3,4),(3,2,3),(-0.340695207147559,-1.38777878078145E-17,
0.00472726817237507,0.0653846687755902),(0.,1.,8.50431964984936),
 .UNSPECIFIED.)
GEOMETRIC_REPRESENTATION_ITEM()
RATIONAL_B_SPLINE_SURFACE(((1.,0.890330525956496,1.,1.,1.),(1.,0.890330525956496,
1.,1.,1.),(1.,0.890330525956496,1.,1.,1.),(1.,0.890330525956496,1.,1.,1.),
(1.,0.892540315178216,1.,1.,1.),(1.,0.892376524245411,1.,1.,1.),(1.,0.889854963301626,
1.,1.,1.),(1.,0.889854963301626,1.,1.,1.),(1.,0.889854963301626,1.,1.,1.),
(1.,0.889854963301626,1.,1.,1.)))
REPRESENTATION_ITEM('')
SURFACE()
);
#542=(
BOUNDED_SURFACE()
B_SPLINE_SURFACE(2,2,((#108904,#108905,#108906),(#108907,#108908,#108909),
(#108910,#108911,#108912)),.UNSPECIFIED.,.F.,.F.,.F.)
B_SPLINE_SURFACE_WITH_KNOTS((3,3),(3,3),(0.279252680319129,1.57079632679499),
(-1.57079632679487,-0.925024503556999),.UNSPECIFIED.)
GEOMETRIC_REPRESENTATION_ITEM()
RATIONAL_B_SPLINE_SURFACE(((1.,0.948323655206204,1.),(0.798635510047271,
0.757364946065499,0.798635510047271),(1.,0.948323655206204,1.)))
REPRESENTATION_ITEM('')
SURFACE()
);
#543=(
BOUNDED_SURFACE()
B_SPLINE_SURFACE(2,2,((#108924,#108925,#108926),(#108927,#108928,#108929),
(#108930,#108931,#108932)),.UNSPECIFIED.,.F.,.F.,.F.)
B_SPLINE_SURFACE_WITH_KNOTS((3,3),(3,3),(0.279252680319131,1.57079632679504),
(-2.21656815003281,-1.57079632679495),.UNSPECIFIED.)
GEOMETRIC_REPRESENTATION_ITEM()
RATIONAL_B_SPLINE_SURFACE(((1.,0.948323655206206,1.),(0.79863551004726,
0.757364946065491,0.79863551004726),(1.,0.948323655206206,1.)))
REPRESENTATION_ITEM('')
SURFACE()
);
#544=(
BOUNDED_SURFACE()
B_SPLINE_SURFACE(3,2,((#109304,#109305,#109306),(#109307,#109308,#109309),
(#109310,#109311,#109312),(#109313,#109314,#109315),(#109316,#109317,#109318),
(#109319,#109320,#109321)),.UNSPECIFIED.,.F.,.F.,.F.)
B_SPLINE_SURFACE_WITH_KNOTS((4,2,4),(3,3),(-5.19417543283385E-5,0.350329448920772,
0.700710839595872),(-5.19417543265622E-5,1.),.UNSPECIFIED.)
GEOMETRIC_REPRESENTATION_ITEM()
RATIONAL_B_SPLINE_SURFACE(((1.00002753417141,0.734951468521874,1.),(1.0000275339576,
0.734953526766634,1.),(1.00002759275738,0.734387510258953,1.),(1.00002782089961,
0.732191375047898,1.),(1.00002799022644,0.73056140668154,1.),(1.00002820612024,
0.728483176947187,1.)))
REPRESENTATION_ITEM('')
SURFACE()
);
#545=(
BOUNDED_SURFACE()
B_SPLINE_SURFACE(3,2,((#109373,#109374,#109375),(#109376,#109377,#109378),
(#109379,#109380,#109381),(#109382,#109383,#109384)),.UNSPECIFIED.,.F.,
 .F.,.F.)
B_SPLINE_SURFACE_WITH_KNOTS((4,4),(3,3),(-2.62587102538357E-5,0.462745148614214),
(0.,1.00002625871025),.UNSPECIFIED.)
GEOMETRIC_REPRESENTATION_ITEM()
RATIONAL_B_SPLINE_SURFACE(((1.,0.693172753096823,1.00001611377555),(1.,
0.693172585364475,1.00001611378436),(1.,0.694650520299686,1.00001603616703),
(1.,0.694650352567338,1.00001603617584)))
REPRESENTATION_ITEM('')
SURFACE()
);
#546=(
BOUNDED_SURFACE()
B_SPLINE_SURFACE(3,2,((#109408,#109409,#109410),(#109411,#109412,#109413),
(#109414,#109415,#109416),(#109417,#109418,#109419)),.UNSPECIFIED.,.F.,
 .F.,.F.)
B_SPLINE_SURFACE_WITH_KNOTS((4,4),(3,3),(-2.62587102511312E-5,0.462745148614214),
(-2.62587102538107E-5,1.),.UNSPECIFIED.)
GEOMETRIC_REPRESENTATION_ITEM()
RATIONAL_B_SPLINE_SURFACE(((1.00001611377555,0.693172753096823,1.),(1.00001611378436,
0.693172585364475,1.),(1.00001603616703,0.694650520299686,1.),(1.00001603617584,
0.694650352567338,1.)))
REPRESENTATION_ITEM('')
SURFACE()
);
#547=(
BOUNDED_SURFACE()
B_SPLINE_SURFACE(3,2,((#109443,#109444,#109445),(#109446,#109447,#109448),
(#109449,#109450,#109451),(#109452,#109453,#109454),(#109455,#109456,#109457),
(#109458,#109459,#109460)),.UNSPECIFIED.,.F.,.F.,.F.)
B_SPLINE_SURFACE_WITH_KNOTS((4,2,4),(3,3),(-5.19417543213911E-5,0.350329448920772,
0.700710839595859),(0.,1.00005194175432),.UNSPECIFIED.)
GEOMETRIC_REPRESENTATION_ITEM()
RATIONAL_B_SPLINE_SURFACE(((1.,0.734951468521875,1.00002753417141),(1.,
0.734953526766636,1.00002753395759),(1.,0.734387510258954,1.00002759275737),
(1.,0.732191375047899,1.0000278208996),(1.,0.730561406681542,1.00002799022644),
(1.,0.728483176947189,1.00002820612023)))
REPRESENTATION_ITEM('')
SURFACE()
);
#548=(
BOUNDED_SURFACE()
B_SPLINE_SURFACE(3,2,((#109526,#109527,#109528),(#109529,#109530,#109531),
(#109532,#109533,#109534),(#109535,#109536,#109537),(#109538,#109539,#109540),
(#109541,#109542,#109543),(#109544,#109545,#109546),(#109547,#109548,#109549),
(#109550,#109551,#109552),(#109553,#109554,#109555)),.UNSPECIFIED.,.F.,
 .F.,.F.)
B_SPLINE_SURFACE_WITH_KNOTS((4,2,2,2,4),(3,3),(3.54172709678598E-16,0.305761777457725,
0.611523554915449,0.917285332373173,1.2230471098309),(0.,1.),
 .UNSPECIFIED.)
GEOMETRIC_REPRESENTATION_ITEM()
RATIONAL_B_SPLINE_SURFACE(((1.,0.95148389481942,1.),(1.,0.951487096956106,
1.),(1.,0.948156559146969,1.),(1.,0.934949325104171,1.),(1.,0.925069195221107,
1.),(1.,0.899065558165242,1.),(1.,0.882941412614773,1.),(1.,0.844978147737314,
1.),(1.,0.823141851010041,1.),(1.,0.798828239418194,1.)))
REPRESENTATION_ITEM('')
SURFACE()
);
#549=(
BOUNDED_SURFACE()
B_SPLINE_SURFACE(3,2,((#109690,#109691,#109692),(#109693,#109694,#109695),
(#109696,#109697,#109698),(#109699,#109700,#109701),(#109702,#109703,#109704),
(#109705,#109706,#109707),(#109708,#109709,#109710),(#109711,#109712,#109713),
(#109714,#109715,#109716),(#109717,#109718,#109719)),.UNSPECIFIED.,.F.,
 .F.,.F.)
B_SPLINE_SURFACE_WITH_KNOTS((4,2,2,2,4),(3,3),(3.54172709678598E-16,0.305761777457725,
0.611523554915449,0.917285332373173,1.2230471098309),(0.,1.),
 .UNSPECIFIED.)
GEOMETRIC_REPRESENTATION_ITEM()
RATIONAL_B_SPLINE_SURFACE(((1.,0.95148389481942,1.),(1.,0.951487096956106,
1.),(1.,0.948156559146969,1.),(1.,0.934949325104171,1.),(1.,0.925069195221107,
1.),(1.,0.899065558165242,1.),(1.,0.882941412614773,1.),(1.,0.844978147737314,
1.),(1.,0.823141851010041,1.),(1.,0.798828239418194,1.)))
REPRESENTATION_ITEM('')
SURFACE()
);
#550=(
BOUNDED_SURFACE()
B_SPLINE_SURFACE(3,2,((#109854,#109855,#109856),(#109857,#109858,#109859),
(#109860,#109861,#109862),(#109863,#109864,#109865),(#109866,#109867,#109868),
(#109869,#109870,#109871),(#109872,#109873,#109874),(#109875,#109876,#109877),
(#109878,#109879,#109880),(#109881,#109882,#109883)),.UNSPECIFIED.,.F.,
 .F.,.F.)
B_SPLINE_SURFACE_WITH_KNOTS((4,2,2,2,4),(3,3),(-1.77635683940025E-15,0.355725288064109,
0.71145057612822,1.06717586419233,1.42290115225644),(0.,1.),
 .UNSPECIFIED.)
GEOMETRIC_REPRESENTATION_ITEM()
RATIONAL_B_SPLINE_SURFACE(((1.,0.877428325440223,1.),(1.,0.8774344714638,
1.),(1.,0.874168543127406,1.),(1.,0.86132489373353,1.),(1.,0.851740093324153,
1.),(1.,0.826844620264501,1.),(1.,0.81153170410023,1.),(1.,0.776226737306156,
1.),(1.,0.756240098684356,1.),(1.,0.73468950671438,1.)))
REPRESENTATION_ITEM('')
SURFACE()
);
#551=(
BOUNDED_SURFACE()
B_SPLINE_SURFACE(3,2,((#110012,#110013,#110014),(#110015,#110016,#110017),
(#110018,#110019,#110020),(#110021,#110022,#110023),(#110024,#110025,#110026),
(#110027,#110028,#110029),(#110030,#110031,#110032),(#110033,#110034,#110035),
(#110036,#110037,#110038),(#110039,#110040,#110041)),.UNSPECIFIED.,.F.,
 .F.,.F.)
B_SPLINE_SURFACE_WITH_KNOTS((4,2,2,2,4),(3,3),(-1.77635683940025E-15,0.355725288064109,
0.71145057612822,1.06717586419233,1.42290115225644),(0.,1.),
 .UNSPECIFIED.)
GEOMETRIC_REPRESENTATION_ITEM()
RATIONAL_B_SPLINE_SURFACE(((1.,0.877428325440223,1.),(1.,0.8774344714638,
1.),(1.,0.874168543127406,1.),(1.,0.86132489373353,1.),(1.,0.851740093324153,
1.),(1.,0.826844620264501,1.),(1.,0.81153170410023,1.),(1.,0.776226737306156,
1.),(1.,0.756240098684356,1.),(1.,0.73468950671438,1.)))
REPRESENTATION_ITEM('')
SURFACE()
);
#552=(
BOUNDED_SURFACE()
B_SPLINE_SURFACE(3,2,((#110170,#110171,#110172),(#110173,#110174,#110175),
(#110176,#110177,#110178),(#110179,#110180,#110181)),.UNSPECIFIED.,.F.,
 .F.,.F.)
B_SPLINE_SURFACE_WITH_KNOTS((4,4),(3,3),(6.18765001020096,6.28318530717958),
(0.,1.),.UNSPECIFIED.)
GEOMETRIC_REPRESENTATION_ITEM()
RATIONAL_B_SPLINE_SURFACE(((1.,0.876726755707507,1.),(1.,0.877194318176748,
1.),(1.,0.877428343543106,1.),(1.,0.877428325440223,1.)))
REPRESENTATION_ITEM('')
SURFACE()
);
#553=(
BOUNDED_SURFACE()
B_SPLINE_SURFACE(3,2,((#110187,#110188,#110189),(#110190,#110191,#110192),
(#110193,#110194,#110195),(#110196,#110197,#110198)),.UNSPECIFIED.,.F.,
 .F.,.F.)
B_SPLINE_SURFACE_WITH_KNOTS((4,4),(3,3),(6.18765001020096,6.28318530717958),
(0.,1.),.UNSPECIFIED.)
GEOMETRIC_REPRESENTATION_ITEM()
RATIONAL_B_SPLINE_SURFACE(((1.,0.876726755707507,1.),(1.,0.877194318176748,
1.),(1.,0.877428343543106,1.),(1.,0.877428325440223,1.)))
REPRESENTATION_ITEM('')
SURFACE()
);
#554=(
BOUNDED_SURFACE()
B_SPLINE_SURFACE(3,2,((#110210,#110211,#110212),(#110213,#110214,#110215),
(#110216,#110217,#110218),(#110219,#110220,#110221)),.UNSPECIFIED.,.F.,
 .F.,.F.)
B_SPLINE_SURFACE_WITH_KNOTS((4,4),(3,3),(0.,0.0172920383741901),(0.,1.),
 .UNSPECIFIED.)
GEOMETRIC_REPRESENTATION_ITEM()
RATIONAL_B_SPLINE_SURFACE(((1.,0.915559557224316,1.),(1.,0.908790235352742,
1.),(1.,0.900981231808787,1.),(1.,0.891779005493401,1.)))
REPRESENTATION_ITEM('')
SURFACE()
);
#555=(
BOUNDED_SURFACE()
B_SPLINE_SURFACE(3,2,((#110242,#110243,#110244),(#110245,#110246,#110247),
(#110248,#110249,#110250),(#110251,#110252,#110253)),.UNSPECIFIED.,.F.,
 .F.,.F.)
B_SPLINE_SURFACE_WITH_KNOTS((4,4),(3,3),(5.77453271233288,6.14103176997623),
(0.,1.),.UNSPECIFIED.)
GEOMETRIC_REPRESENTATION_ITEM()
RATIONAL_B_SPLINE_SURFACE(((1.,0.731497055427732,1.),(1.,0.73313205100184,
1.),(1.,0.734217565232637,1.),(1.,0.73468950671438,1.)))
REPRESENTATION_ITEM('')
SURFACE()
);
#556=(
BOUNDED_SURFACE()
B_SPLINE_SURFACE(3,2,((#110271,#110272,#110273),(#110274,#110275,#110276),
(#110277,#110278,#110279),(#110280,#110281,#110282),(#110283,#110284,#110285),
(#110286,#110287,#110288)),.UNSPECIFIED.,.F.,.F.,.F.)
B_SPLINE_SURFACE_WITH_KNOTS((4,2,4),(3,3),(5.42101086242752E-20,0.000312867988404966,
0.000625735976809932),(0.,1.),.UNSPECIFIED.)
GEOMETRIC_REPRESENTATION_ITEM()
RATIONAL_B_SPLINE_SURFACE(((1.,0.798828239418195,1.),(1.,0.802591061888722,
1.),(1.,0.804923062367315,1.),(1.,0.80760181565237,1.),(1.,0.80788814422859,
1.),(1.,0.807362443320933,1.)))
REPRESENTATION_ITEM('')
SURFACE()
);
#557=(
BOUNDED_SURFACE()
B_SPLINE_SURFACE(3,2,((#110342,#110343,#110344),(#110345,#110346,#110347),
(#110348,#110349,#110350),(#110351,#110352,#110353),(#110354,#110355,#110356),
(#110357,#110358,#110359)),.UNSPECIFIED.,.F.,.F.,.F.)
B_SPLINE_SURFACE_WITH_KNOTS((4,2,4),(3,3),(-3.46944695195361E-18,0.00031283151146029,
0.000625663022920584),(0.,1.),.UNSPECIFIED.)
GEOMETRIC_REPRESENTATION_ITEM()
RATIONAL_B_SPLINE_SURFACE(((1.,0.807362443320933,1.),(1.,0.80788501027713,
1.),(1.,0.807605062812131,1.),(1.,0.804932149502423,1.),(1.,0.802588610190482,
1.),(1.,0.798828239418197,1.)))
REPRESENTATION_ITEM('')
SURFACE()
);
#558=(
BOUNDED_SURFACE()
B_SPLINE_SURFACE(3,2,((#110401,#110402,#110403),(#110404,#110405,#110406),
(#110407,#110408,#110409),(#110410,#110411,#110412),(#110413,#110414,#110415),
(#110416,#110417,#110418),(#110419,#110420,#110421),(#110422,#110423,#110424),
(#110425,#110426,#110427),(#110428,#110429,#110430)),.UNSPECIFIED.,.F.,
 .F.,.F.)
B_SPLINE_SURFACE_WITH_KNOTS((4,2,2,2,4),(3,3),(1.9185455437589,2.22745354260655,
2.53636154145421,2.84526954030186,3.15417753914951),(0.,1.),
 .UNSPECIFIED.)
GEOMETRIC_REPRESENTATION_ITEM()
RATIONAL_B_SPLINE_SURFACE(((1.,0.798828239418197,1.),(1.,0.823392164411664,
1.),(1.,0.845427119234131,1.),(1.,0.883662532231227,1.),(1.,0.899860058556627,
1.),(1.,0.925872211411234,1.),(1.,0.935687497918151,1.),(1.,0.948622792856395,
1.),(1.,0.951746370260766,1.),(1.,0.951467027930828,1.)))
REPRESENTATION_ITEM('')
SURFACE()
);
#559=(
BOUNDED_SURFACE()
B_SPLINE_SURFACE(3,2,((#110571,#110572,#110573),(#110574,#110575,#110576),
(#110577,#110578,#110579),(#110580,#110581,#110582)),.UNSPECIFIED.,.F.,
 .F.,.F.)
B_SPLINE_SURFACE_WITH_KNOTS((4,4),(3,3),(6.27060042161987,6.28318530717959),
(0.,1.),.UNSPECIFIED.)
GEOMETRIC_REPRESENTATION_ITEM()
RATIONAL_B_SPLINE_SURFACE(((1.,0.951467027930828,1.),(1.,0.951478272479706,
1.),(1.,0.951483894824646,1.),(1.,0.95148389481942,1.)))
REPRESENTATION_ITEM('')
SURFACE()
);
#560=(
BOUNDED_SURFACE()
B_SPLINE_SURFACE(3,2,((#110594,#110595,#110596),(#110597,#110598,#110599),
(#110600,#110601,#110602),(#110603,#110604,#110605),(#110606,#110607,#110608),
(#110609,#110610,#110611)),.UNSPECIFIED.,.F.,.F.,.F.)
B_SPLINE_SURFACE_WITH_KNOTS((4,2,4),(3,3),(-3.46944695195361E-18,0.00031283151146029,
0.000625663022920584),(0.,1.),.UNSPECIFIED.)
GEOMETRIC_REPRESENTATION_ITEM()
RATIONAL_B_SPLINE_SURFACE(((1.,0.807362443320933,1.),(1.,0.80788501027713,
1.),(1.,0.807605062812131,1.),(1.,0.804932149502423,1.),(1.,0.802588610190482,
1.),(1.,0.798828239418197,1.)))
REPRESENTATION_ITEM('')
SURFACE()
);
#561=(
BOUNDED_SURFACE()
B_SPLINE_SURFACE(3,2,((#110659,#110660,#110661),(#110662,#110663,#110664),
(#110665,#110666,#110667),(#110668,#110669,#110670),(#110671,#110672,#110673),
(#110674,#110675,#110676)),.UNSPECIFIED.,.F.,.F.,.F.)
B_SPLINE_SURFACE_WITH_KNOTS((4,2,4),(3,3),(5.42101086242752E-20,0.000312867988404966,
0.000625735976809932),(0.,1.),.UNSPECIFIED.)
GEOMETRIC_REPRESENTATION_ITEM()
RATIONAL_B_SPLINE_SURFACE(((1.,0.798828239418195,1.),(1.,0.802591061888722,
1.),(1.,0.804923062367315,1.),(1.,0.80760181565237,1.),(1.,0.80788814422859,
1.),(1.,0.807362443320933,1.)))
REPRESENTATION_ITEM('')
SURFACE()
);
#562=(
BOUNDED_SURFACE()
B_SPLINE_SURFACE(3,2,((#110715,#110716,#110717),(#110718,#110719,#110720),
(#110721,#110722,#110723),(#110724,#110725,#110726)),.UNSPECIFIED.,.F.,
 .F.,.F.)
B_SPLINE_SURFACE_WITH_KNOTS((4,4),(3,3),(6.27060042161987,6.28318530717959),
(0.,1.),.UNSPECIFIED.)
GEOMETRIC_REPRESENTATION_ITEM()
RATIONAL_B_SPLINE_SURFACE(((1.,0.951467027930828,1.),(1.,0.951478272479706,
1.),(1.,0.951483894824646,1.),(1.,0.95148389481942,1.)))
REPRESENTATION_ITEM('')
SURFACE()
);
#563=(
BOUNDED_SURFACE()
B_SPLINE_SURFACE(3,2,((#110738,#110739,#110740),(#110741,#110742,#110743),
(#110744,#110745,#110746),(#110747,#110748,#110749),(#110750,#110751,#110752),
(#110753,#110754,#110755),(#110756,#110757,#110758),(#110759,#110760,#110761),
(#110762,#110763,#110764),(#110765,#110766,#110767)),.UNSPECIFIED.,.F.,
 .F.,.F.)
B_SPLINE_SURFACE_WITH_KNOTS((4,2,2,2,4),(3,3),(1.9185455437589,2.22745354260655,
2.53636154145421,2.84526954030186,3.15417753914951),(0.,1.),
 .UNSPECIFIED.)
GEOMETRIC_REPRESENTATION_ITEM()
RATIONAL_B_SPLINE_SURFACE(((1.,0.798828239418197,1.),(1.,0.823392164411664,
1.),(1.,0.845427119234131,1.),(1.,0.883662532231227,1.),(1.,0.899860058556627,
1.),(1.,0.925872211411234,1.),(1.,0.935687497918151,1.),(1.,0.948622792856395,
1.),(1.,0.951746370260766,1.),(1.,0.951467027930828,1.)))
REPRESENTATION_ITEM('')
SURFACE()
);
#564=(
BOUNDED_SURFACE()
B_SPLINE_SURFACE(3,2,((#110905,#110906,#110907),(#110908,#110909,#110910),
(#110911,#110912,#110913),(#110914,#110915,#110916)),.UNSPECIFIED.,.F.,
 .F.,.F.)
B_SPLINE_SURFACE_WITH_KNOTS((4,4),(3,3),(5.77453271233288,6.14103176997623),
(0.,1.),.UNSPECIFIED.)
GEOMETRIC_REPRESENTATION_ITEM()
RATIONAL_B_SPLINE_SURFACE(((1.,0.731497055427732,1.),(1.,0.73313205100184,
1.),(1.,0.734217565232637,1.),(1.,0.73468950671438,1.)))
REPRESENTATION_ITEM('')
SURFACE()
);
#565=(
BOUNDED_SURFACE()
B_SPLINE_SURFACE(3,2,((#110922,#110923,#110924),(#110925,#110926,#110927),
(#110928,#110929,#110930),(#110931,#110932,#110933)),.UNSPECIFIED.,.F.,
 .F.,.F.)
B_SPLINE_SURFACE_WITH_KNOTS((4,4),(3,3),(0.,0.0172920383741901),(0.,1.),
 .UNSPECIFIED.)
GEOMETRIC_REPRESENTATION_ITEM()
RATIONAL_B_SPLINE_SURFACE(((1.,0.915559557224316,1.),(1.,0.908790235352742,
1.),(1.,0.900981231808787,1.),(1.,0.891779005493401,1.)))
REPRESENTATION_ITEM('')
SURFACE()
);
#566=(
BOUNDED_SURFACE()
B_SPLINE_SURFACE(3,2,((#110954,#110955,#110956),(#110957,#110958,#110959),
(#110960,#110961,#110962),(#110963,#110964,#110965)),.UNSPECIFIED.,.F.,
 .F.,.F.)
B_SPLINE_SURFACE_WITH_KNOTS((4,4),(3,3),(0.,0.0226287218308294),(0.,1.),
 .UNSPECIFIED.)
GEOMETRIC_REPRESENTATION_ITEM()
RATIONAL_B_SPLINE_SURFACE(((1.,0.922592273331123,1.),(1.,0.914497557763564,
1.),(1.,0.904700697765485,1.),(1.,0.89230811838896,1.)))
REPRESENTATION_ITEM('')
SURFACE()
);
#567=(
BOUNDED_SURFACE()
B_SPLINE_SURFACE(3,2,((#110974,#110975,#110976),(#110977,#110978,#110979),
(#110980,#110981,#110982),(#110983,#110984,#110985)),.UNSPECIFIED.,.F.,
 .F.,.F.)
B_SPLINE_SURFACE_WITH_KNOTS((4,4),(3,3),(0.,0.0226287218308294),(0.,1.),
 .UNSPECIFIED.)
GEOMETRIC_REPRESENTATION_ITEM()
RATIONAL_B_SPLINE_SURFACE(((1.,0.922592273331123,1.),(1.,0.914497557763564,
1.),(1.,0.904700697765485,1.),(1.,0.89230811838896,1.)))
REPRESENTATION_ITEM('')
SURFACE()
);
#568=(
BOUNDED_SURFACE()
B_SPLINE_SURFACE(3,2,((#111090,#111091,#111092),(#111093,#111094,#111095),
(#111096,#111097,#111098),(#111099,#111100,#111101),(#111102,#111103,#111104),
(#111105,#111106,#111107),(#111108,#111109,#111110),(#111111,#111112,#111113),
(#111114,#111115,#111116),(#111117,#111118,#111119)),.UNSPECIFIED.,.F.,
 .F.,.F.)
B_SPLINE_SURFACE_WITH_KNOTS((4,2,2,2,4),(3,3),(1.71869150133335,2.09830061364212,
2.47790972595089,2.85751883825965,3.23712795056842),(0.,1.),
 .UNSPECIFIED.)
GEOMETRIC_REPRESENTATION_ITEM()
RATIONAL_B_SPLINE_SURFACE(((1.,0.73468950671438,1.),(1.,0.757689149078365,
1.),(1.,0.778900991348622,1.),(1.,0.815905593580062,1.),(1.,0.831691597006462,
1.),(1.,0.856612427274522,1.),(1.,0.865750072339667,1.),(1.,0.876735624677884,
1.),(1.,0.878592466719876,1.),(1.,0.876726755707507,1.)))
REPRESENTATION_ITEM('')
SURFACE()
);
#569=(
BOUNDED_SURFACE()
B_SPLINE_SURFACE(3,2,((#111192,#111193,#111194),(#111195,#111196,#111197),
(#111198,#111199,#111200),(#111201,#111202,#111203),(#111204,#111205,#111206),
(#111207,#111208,#111209),(#111210,#111211,#111212),(#111213,#111214,#111215),
(#111216,#111217,#111218),(#111219,#111220,#111221)),.UNSPECIFIED.,.F.,
 .F.,.F.)
B_SPLINE_SURFACE_WITH_KNOTS((4,2,2,2,4),(3,3),(1.71869150133335,2.09830061364212,
2.47790972595089,2.85751883825965,3.23712795056842),(0.,1.),
 .UNSPECIFIED.)
GEOMETRIC_REPRESENTATION_ITEM()
RATIONAL_B_SPLINE_SURFACE(((1.,0.73468950671438,1.),(1.,0.757689149078365,
1.),(1.,0.778900991348622,1.),(1.,0.815905593580062,1.),(1.,0.831691597006462,
1.),(1.,0.856612427274522,1.),(1.,0.865750072339667,1.),(1.,0.876735624677884,
1.),(1.,0.878592466719876,1.),(1.,0.876726755707507,1.)))
REPRESENTATION_ITEM('')
SURFACE()
);
#570=(
BOUNDED_SURFACE()
B_SPLINE_SURFACE(3,2,((#111378,#111379,#111380),(#111381,#111382,#111383),
(#111384,#111385,#111386),(#111387,#111388,#111389)),.UNSPECIFIED.,.F.,
 .F.,.F.)
B_SPLINE_SURFACE_WITH_KNOTS((4,4),(3,3),(0.,0.0044026788245558),(0.,1.),
 .UNSPECIFIED.)
GEOMETRIC_REPRESENTATION_ITEM()
RATIONAL_B_SPLINE_SURFACE(((1.,0.891779005493402,1.),(1.,0.894199831724372,
1.),(1.,0.893773470679131,1.),(1.,0.890481625303933,1.)))
REPRESENTATION_ITEM('')
SURFACE()
);
#571=(
BOUNDED_SURFACE()
B_SPLINE_SURFACE(3,2,((#111428,#111429,#111430),(#111431,#111432,#111433),
(#111434,#111435,#111436),(#111437,#111438,#111439)),.UNSPECIFIED.,.F.,
 .F.,.F.)
B_SPLINE_SURFACE_WITH_KNOTS((4,4),(3,3),(0.,0.00474367130955936),(0.,1.),
 .UNSPECIFIED.)
GEOMETRIC_REPRESENTATION_ITEM()
RATIONAL_B_SPLINE_SURFACE(((1.,0.892308118388959,1.),(1.,0.894049496476187,
1.),(1.,0.893378737085832,1.),(1.,0.890330829062853,1.)))
REPRESENTATION_ITEM('')
SURFACE()
);
#572=(
BOUNDED_SURFACE()
B_SPLINE_SURFACE(3,2,((#111443,#111444,#111445),(#111446,#111447,#111448),
(#111449,#111450,#111451),(#111452,#111453,#111454)),.UNSPECIFIED.,.F.,
 .F.,.F.)
B_SPLINE_SURFACE_WITH_KNOTS((4,4),(3,3),(0.,0.00474367130955936),(0.,1.),
 .UNSPECIFIED.)
GEOMETRIC_REPRESENTATION_ITEM()
RATIONAL_B_SPLINE_SURFACE(((1.,0.892308118388959,1.),(1.,0.894049496476187,
1.),(1.,0.893378737085832,1.),(1.,0.890330829062853,1.)))
REPRESENTATION_ITEM('')
SURFACE()
);
#573=(
BOUNDED_SURFACE()
B_SPLINE_SURFACE(3,2,((#111458,#111459,#111460),(#111461,#111462,#111463),
(#111464,#111465,#111466),(#111467,#111468,#111469)),.UNSPECIFIED.,.F.,
 .F.,.F.)
B_SPLINE_SURFACE_WITH_KNOTS((4,4),(3,3),(0.,0.0044026788245558),(0.,1.),
 .UNSPECIFIED.)
GEOMETRIC_REPRESENTATION_ITEM()
RATIONAL_B_SPLINE_SURFACE(((1.,0.891779005493402,1.),(1.,0.894199831724372,
1.),(1.,0.893773470679131,1.),(1.,0.890481625303933,1.)))
REPRESENTATION_ITEM('')
SURFACE()
);
#574=(
BOUNDED_SURFACE()
B_SPLINE_SURFACE(3,2,((#111542,#111543,#111544),(#111545,#111546,#111547),
(#111548,#111549,#111550),(#111551,#111552,#111553),(#111554,#111555,#111556),
(#111557,#111558,#111559),(#111560,#111561,#111562),(#111563,#111564,#111565),
(#111566,#111567,#111568),(#111569,#111570,#111571),(#111572,#111573,#111574),
(#111575,#111576,#111577),(#111578,#111579,#111580),(#111581,#111582,#111583),
(#111584,#111585,#111586),(#111587,#111588,#111589),(#111590,#111591,#111592),
(#111593,#111594,#111595),(#111596,#111597,#111598),(#111599,#111600,#111601)),
 .UNSPECIFIED.,.F.,.F.,.F.)
B_SPLINE_SURFACE_WITH_KNOTS((4,2,2,2,2,2,2,2,2,4),(3,3),(-0.000145103473442963,
0.000302298903006419,0.000453448354509628,0.000529023080261233,0.000604597806012837,
0.000680172531764442,0.000755747257516046,0.000906896709019256,0.00105804616052247,
0.00135429908546881),(-0.000504793873576379,1.),.UNSPECIFIED.)
GEOMETRIC_REPRESENTATION_ITEM()
RATIONAL_B_SPLINE_SURFACE(((1.00011108393764,0.889970992661458,1.),(1.00008737447557,
0.913455293201917,1.),(1.00006407706802,0.936531452373784,1.),(1.00003694453525,
0.963406315750701,1.),(1.00003041718276,0.969871679960011,1.),(1.00002198342395,
0.97822534593305,1.),(1.00001940788876,0.980776422046862,1.),(1.00001515104315,
0.984992841685465,1.),(1.00001351169446,0.986616621984217,1.),(1.00001198367594,
0.988130129378612,1.),(1.00001214945794,0.987965921762413,1.),(1.00001423130381,
0.985903846548988,1.),(1.00001607622902,0.98407644202078,1.),(1.00002289500929,
0.977322417639011,1.),(1.00002893075112,0.971343995402196,1.),(1.00004187111017,
0.958526527001004,1.),(1.00004875882025,0.951704227405924,1.),(1.00006994943824,
0.930714850257406,1.),(1.00008506326736,0.915744552566146,1.),(1.00010087854628,
0.900079466535625,1.)))
REPRESENTATION_ITEM('')
SURFACE()
);
#575=(
BOUNDED_SURFACE()
B_SPLINE_SURFACE(3,2,((#111688,#111689,#111690),(#111691,#111692,#111693),
(#111694,#111695,#111696),(#111697,#111698,#111699),(#111700,#111701,#111702),
(#111703,#111704,#111705),(#111706,#111707,#111708),(#111709,#111710,#111711)),
 .UNSPECIFIED.,.F.,.F.,.F.)
B_SPLINE_SURFACE_WITH_KNOTS((4,2,2,4),(3,3),(0.,0.00102042175040353,0.00204084350080706,
0.00408168700161413),(0.,1.),.UNSPECIFIED.)
GEOMETRIC_REPRESENTATION_ITEM()
RATIONAL_B_SPLINE_SURFACE(((1.,0.9155595572253,1.),(1.,0.902208755774441,
1.),(1.,0.88803831959406,1.),(1.,0.858296347672782,1.),(1.,0.842673276004672,
1.),(1.,0.794006366768701,1.),(1.,0.759545445520026,1.),(1.,0.722350066312589,
1.)))
REPRESENTATION_ITEM('')
SURFACE()
);
#576=(
BOUNDED_SURFACE()
B_SPLINE_SURFACE(3,2,((#111807,#111808,#111809),(#111810,#111811,#111812),
(#111813,#111814,#111815),(#111816,#111817,#111818),(#111819,#111820,#111821),
(#111822,#111823,#111824),(#111825,#111826,#111827),(#111828,#111829,#111830)),
 .UNSPECIFIED.,.F.,.F.,.F.)
B_SPLINE_SURFACE_WITH_KNOTS((4,2,2,4),(3,3),(-3.59521440396193E-16,0.00141362845549178,
0.00282725691098392,0.00565451382196819),(0.,1.),.UNSPECIFIED.)
GEOMETRIC_REPRESENTATION_ITEM()
RATIONAL_B_SPLINE_SURFACE(((1.,0.811835924523646,1.),(1.,0.807456531197405,
1.),(1.,0.802518581984056,1.),(1.,0.791557578497205,1.),(1.,0.785536408611306,
1.),(1.,0.765718356293528,1.),(1.,0.750995367777048,1.),(1.,0.734748532838395,
1.)))
REPRESENTATION_ITEM('')
SURFACE()
);
#577=(
BOUNDED_SURFACE()
B_SPLINE_SURFACE(3,2,((#111859,#111860,#111861),(#111862,#111863,#111864),
(#111865,#111866,#111867),(#111868,#111869,#111870)),.UNSPECIFIED.,.F.,
 .F.,.F.)
B_SPLINE_SURFACE_WITH_KNOTS((4,4),(3,3),(0.,0.00038429493749017),(0.,1.),
 .UNSPECIFIED.)
GEOMETRIC_REPRESENTATION_ITEM()
RATIONAL_B_SPLINE_SURFACE(((1.,0.73149705542773,1.),(1.,0.733511450764141,
1.),(1.,0.73468288887091,1.),(1.,0.734748532838391,1.)))
REPRESENTATION_ITEM('')
SURFACE()
);
#578=(
BOUNDED_SURFACE()
B_SPLINE_SURFACE(3,2,((#111883,#111884,#111885),(#111886,#111887,#111888),
(#111889,#111890,#111891),(#111892,#111893,#111894),(#111895,#111896,#111897),
(#111898,#111899,#111900),(#111901,#111902,#111903),(#111904,#111905,#111906),
(#111907,#111908,#111909),(#111910,#111911,#111912)),.UNSPECIFIED.,.F.,
 .F.,.F.)
B_SPLINE_SURFACE_WITH_KNOTS((4,2,2,2,4),(3,3),(0.,0.00450547199494551,0.00901094398989101,
0.0135164159848365,0.018021887979782),(0.,1.),.UNSPECIFIED.)
GEOMETRIC_REPRESENTATION_ITEM()
RATIONAL_B_SPLINE_SURFACE(((1.,0.725374371012488,1.),(1.,0.741797635640407,
1.),(1.,0.757600951347971,1.),(1.,0.788170600039172,1.),(1.,0.802937425890607,
1.),(1.,0.831578919750086,1.),(1.,0.845453414855804,1.),(1.,0.872401065246026,
1.),(1.,0.885473828596799,1.),(1.,0.898164555411162,1.)))
REPRESENTATION_ITEM('')
SURFACE()
);
#579=(
BOUNDED_SURFACE()
B_SPLINE_SURFACE(3,2,((#112216,#112217,#112218,#112219,#112220),(#112221,
#112222,#112223,#112224,#112225),(#112226,#112227,#112228,#112229,#112230),
(#112231,#112232,#112233,#112234,#112235),(#112236,#112237,#112238,#112239,
#112240),(#112241,#112242,#112243,#112244,#112245),(#112246,#112247,#112248,
#112249,#112250),(#112251,#112252,#112253,#112254,#112255),(#112256,#112257,
#112258,#112259,#112260),(#112261,#112262,#112263,#112264,#112265)),
 .UNSPECIFIED.,.F.,.F.,.F.)
B_SPLINE_SURFACE_WITH_KNOTS((4,3,3,4),(3,2,3),(-0.340695207121317,-1.38777878078145E-17,
0.00472726817237507,0.0653846687702115),(-7.5043196497715,0.,1.),
 .UNSPECIFIED.)
GEOMETRIC_REPRESENTATION_ITEM()
RATIONAL_B_SPLINE_SURFACE(((1.,1.,1.,0.890330525956496,1.),(1.,1.,1.,0.890330525956496,
1.),(1.,1.,1.,0.890330525956496,1.),(1.,1.,1.,0.890330525956496,1.),(1.,
1.,1.,0.892540315178212,1.),(1.,1.,1.,0.892376524245414,1.),(1.,1.,1.,0.889854963301626,
1.),(1.,1.,1.,0.889854963301626,1.),(1.,1.,1.,0.889854963301626,1.),(1.,
1.,1.,0.889854963301626,1.)))
REPRESENTATION_ITEM('')
SURFACE()
);
#580=(
BOUNDED_SURFACE()
B_SPLINE_SURFACE(3,2,((#112398,#112399,#112400),(#112401,#112402,#112403),
(#112404,#112405,#112406),(#112407,#112408,#112409)),.UNSPECIFIED.,.F.,
 .F.,.F.)
B_SPLINE_SURFACE_WITH_KNOTS((4,4),(3,3),(0.,0.00038429493749017),(0.,1.),
 .UNSPECIFIED.)
GEOMETRIC_REPRESENTATION_ITEM()
RATIONAL_B_SPLINE_SURFACE(((1.,0.73149705542773,1.),(1.,0.733511450764141,
1.),(1.,0.73468288887091,1.),(1.,0.734748532838391,1.)))
REPRESENTATION_ITEM('')
SURFACE()
);
#581=(
BOUNDED_SURFACE()
B_SPLINE_SURFACE(3,2,((#112419,#112420,#112421),(#112422,#112423,#112424),
(#112425,#112426,#112427),(#112428,#112429,#112430),(#112431,#112432,#112433),
(#112434,#112435,#112436),(#112437,#112438,#112439),(#112440,#112441,#112442)),
 .UNSPECIFIED.,.F.,.F.,.F.)
B_SPLINE_SURFACE_WITH_KNOTS((4,2,2,4),(3,3),(-3.59521440396193E-16,0.00141362845549178,
0.00282725691098392,0.00565451382196819),(0.,1.),.UNSPECIFIED.)
GEOMETRIC_REPRESENTATION_ITEM()
RATIONAL_B_SPLINE_SURFACE(((1.,0.811835924523646,1.),(1.,0.807456531197405,
1.),(1.,0.802518581984056,1.),(1.,0.791557578497205,1.),(1.,0.785536408611306,
1.),(1.,0.765718356293528,1.),(1.,0.750995367777048,1.),(1.,0.734748532838395,
1.)))
REPRESENTATION_ITEM('')
SURFACE()
);
#582=(
BOUNDED_SURFACE()
B_SPLINE_SURFACE(3,2,((#112528,#112529,#112530),(#112531,#112532,#112533),
(#112534,#112535,#112536),(#112537,#112538,#112539),(#112540,#112541,#112542),
(#112543,#112544,#112545),(#112546,#112547,#112548),(#112549,#112550,#112551)),
 .UNSPECIFIED.,.F.,.F.,.F.)
B_SPLINE_SURFACE_WITH_KNOTS((4,2,2,4),(3,3),(0.,0.00102042175040353,0.00204084350080706,
0.00408168700161413),(0.,1.),.UNSPECIFIED.)
GEOMETRIC_REPRESENTATION_ITEM()
RATIONAL_B_SPLINE_SURFACE(((1.,0.9155595572253,1.),(1.,0.902208755774441,
1.),(1.,0.88803831959406,1.),(1.,0.858296347672782,1.),(1.,0.842673276004672,
1.),(1.,0.794006366768701,1.),(1.,0.759545445520034,1.),(1.,0.722350066312587,
1.)))
REPRESENTATION_ITEM('')
SURFACE()
);
#583=(
BOUNDED_SURFACE()
B_SPLINE_SURFACE(3,2,((#112658,#112659,#112660),(#112661,#112662,#112663),
(#112664,#112665,#112666),(#112667,#112668,#112669),(#112670,#112671,#112672),
(#112673,#112674,#112675),(#112676,#112677,#112678),(#112679,#112680,#112681),
(#112682,#112683,#112684),(#112685,#112686,#112687),(#112688,#112689,#112690),
(#112691,#112692,#112693),(#112694,#112695,#112696),(#112697,#112698,#112699),
(#112700,#112701,#112702),(#112703,#112704,#112705),(#112706,#112707,#112708),
(#112709,#112710,#112711),(#112712,#112713,#112714),(#112715,#112716,#112717)),
 .UNSPECIFIED.,.F.,.F.,.F.)
B_SPLINE_SURFACE_WITH_KNOTS((4,2,2,2,2,2,2,2,2,4),(3,3),(-0.000145103473442952,
0.000302298903006419,0.000453448354509628,0.000529023080261233,0.000604597806012837,
0.000680172531764442,0.000755747257516046,0.000906896709019256,0.00105804616052247,
0.00135429908546874),(0.,1.0005047938706),.UNSPECIFIED.)
GEOMETRIC_REPRESENTATION_ITEM()
RATIONAL_B_SPLINE_SURFACE(((1.,0.889970992661787,1.00011108393698),(1.,
0.913455293202176,1.00008737447505),(1.,0.936531452373973,1.00006407706764),
(1.,0.96340631575081,1.00003694453502),(1.,0.969871679960059,1.00003041718258),
(1.,0.978225345933136,1.00002198342381),(1.,0.980776422046997,1.00001940788865),
(1.,0.984992841685431,1.00001515104307),(1.,0.986616621984256,1.00001351169439),
(1.,0.988130129378648,1.00001198367587),(1.,0.987965921762413,1.00001214945787),
(1.,0.985903846549066,1.00001423130373),(1.,0.984076442020855,1.00001607622893),
(1.,0.977322417639022,1.00002289500915),(1.,0.971343995402312,1.00002893075095),
(1.,0.958526527001098,1.00004187110992),(1.,0.95170422740587,1.00004875881996),
(1.,0.930714850258009,1.00006994943783),(1.,0.915744552565059,1.00008506326686),
(1.,0.900079466538709,1.00010087854568)))
REPRESENTATION_ITEM('')
SURFACE()
);
#584=(
BOUNDED_SURFACE()
B_SPLINE_SURFACE(3,2,((#112834,#112835,#112836),(#112837,#112838,#112839),
(#112840,#112841,#112842),(#112843,#112844,#112845),(#112846,#112847,#112848),
(#112849,#112850,#112851),(#112852,#112853,#112854),(#112855,#112856,#112857),
(#112858,#112859,#112860),(#112861,#112862,#112863)),.UNSPECIFIED.,.F.,
 .F.,.F.)
B_SPLINE_SURFACE_WITH_KNOTS((4,2,2,2,4),(3,3),(0.,0.00450547199494551,0.00901094398989102,
0.0135164159848365,0.018021887979782),(0.,1.),.UNSPECIFIED.)
GEOMETRIC_REPRESENTATION_ITEM()
RATIONAL_B_SPLINE_SURFACE(((1.,0.725374371012488,1.),(1.,0.741797635640907,
1.),(1.,0.757600951347304,1.),(1.,0.788170600039842,1.),(1.,0.802937425891857,
1.),(1.,0.831578919748836,1.),(1.,0.845453414855051,1.),(1.,0.872401065246777,
1.),(1.,0.885473828596237,1.),(1.,0.898164555411161,1.)))
REPRESENTATION_ITEM('')
SURFACE()
);
#585=(
BOUNDED_SURFACE()
B_SPLINE_SURFACE(3,2,((#113064,#113065,#113066),(#113067,#113068,#113069),
(#113070,#113071,#113072),(#113073,#113074,#113075)),.UNSPECIFIED.,.F.,
 .F.,.F.)
B_SPLINE_SURFACE_WITH_KNOTS((4,4),(3,3),(3.28374619079316,3.84225155143134),
(0.,1.),.UNSPECIFIED.)
GEOMETRIC_REPRESENTATION_ITEM()
RATIONAL_B_SPLINE_SURFACE(((1.,0.73468950671438,1.),(1.,0.733975111334965,
1.),(1.,0.731814289992443,1.),(1.,0.728498203449232,1.)))
REPRESENTATION_ITEM('')
SURFACE()
);
#586=(
BOUNDED_SURFACE()
B_SPLINE_SURFACE(3,2,((#113111,#113112,#113113),(#113114,#113115,#113116),
(#113117,#113118,#113119),(#113120,#113121,#113122)),.UNSPECIFIED.,.F.,
 .F.,.F.)
B_SPLINE_SURFACE_WITH_KNOTS((4,4),(3,3),(3.28374619079316,3.84225155143134),
(0.,1.),.UNSPECIFIED.)
GEOMETRIC_REPRESENTATION_ITEM()
RATIONAL_B_SPLINE_SURFACE(((1.,0.73468950671438,1.),(1.,0.733975111334965,
1.),(1.,0.731814289992443,1.),(1.,0.728498203449232,1.)))
REPRESENTATION_ITEM('')
SURFACE()
);
#587=(
BOUNDED_SURFACE()
B_SPLINE_SURFACE(3,2,((#113203,#113204,#113205),(#113206,#113207,#113208),
(#113209,#113210,#113211),(#113212,#113213,#113214)),.UNSPECIFIED.,.F.,
 .F.,.F.)
B_SPLINE_SURFACE_WITH_KNOTS((4,4),(3,3),(0.0964217782350428,0.100361107409697),
(0.,1.),.UNSPECIFIED.)
GEOMETRIC_REPRESENTATION_ITEM()
RATIONAL_B_SPLINE_SURFACE(((1.,0.987516305559486,1.),(1.,0.988266894987641,
1.),(1.,0.988989422996176,1.),(1.,0.989682251304103,1.)))
REPRESENTATION_ITEM('')
SURFACE()
);
#588=(
BOUNDED_SURFACE()
B_SPLINE_SURFACE(3,2,((#113218,#113219,#113220),(#113221,#113222,#113223),
(#113224,#113225,#113226),(#113227,#113228,#113229)),.UNSPECIFIED.,.F.,
 .F.,.F.)
B_SPLINE_SURFACE_WITH_KNOTS((4,4),(3,3),(0.0964217782350428,0.100361107409697),
(0.,1.),.UNSPECIFIED.)
GEOMETRIC_REPRESENTATION_ITEM()
RATIONAL_B_SPLINE_SURFACE(((1.,0.987516305559486,1.),(1.,0.988266894987643,
1.),(1.,0.988989422996176,1.),(1.,0.989682251304103,1.)))
REPRESENTATION_ITEM('')
SURFACE()
);
#589=(
BOUNDED_SURFACE()
B_SPLINE_SURFACE(3,2,((#113235,#113236,#113237),(#113238,#113239,#113240),
(#113241,#113242,#113243),(#113244,#113245,#113246),(#113247,#113248,#113249),
(#113250,#113251,#113252),(#113253,#113254,#113255),(#113256,#113257,#113258),
(#113259,#113260,#113261),(#113262,#113263,#113264),(#113265,#113266,#113267),
(#113268,#113269,#113270),(#113271,#113272,#113273),(#113274,#113275,#113276)),
 .UNSPECIFIED.,.F.,.F.,.F.)
B_SPLINE_SURFACE_WITH_KNOTS((4,2,2,2,2,2,4),(3,3),(0.,0.000414447455451902,
0.000828894910903804,0.00124334236635571,0.00165778982180761,0.00248668473271141,
0.00331557964361522),(0.,1.),.UNSPECIFIED.)
GEOMETRIC_REPRESENTATION_ITEM()
RATIONAL_B_SPLINE_SURFACE(((1.,0.890481625303935,1.),(1.,0.891303010279246,
1.),(1.,0.890914616712163,1.),(1.,0.887789449824786,1.),(1.,0.885009863471109,
1.),(1.,0.877443879429436,1.),(1.,0.872578483482848,1.),(1.,0.861146326601627,
1.),(1.,0.854626508469641,1.),(1.,0.832750509677,1.),(1.,0.815509922452662,
1.),(1.,0.777149977595946,1.),(1.,0.756503242220823,1.),(1.,0.734119045965882,
1.)))
REPRESENTATION_ITEM('')
SURFACE()
);
#590=(
BOUNDED_SURFACE()
B_SPLINE_SURFACE(3,2,((#113316,#113317,#113318),(#113319,#113320,#113321),
(#113322,#113323,#113324),(#113325,#113326,#113327)),.UNSPECIFIED.,.F.,
 .F.,.F.)
B_SPLINE_SURFACE_WITH_KNOTS((4,4),(3,3),(5.99960283367362,6.033768017184),
(0.,1.),.UNSPECIFIED.)
GEOMETRIC_REPRESENTATION_ITEM()
RATIONAL_B_SPLINE_SURFACE(((1.,0.733872823887339,1.),(1.,0.733960040443134,
1.),(1.,0.73404212870921,1.),(1.,0.734119045965882,1.)))
REPRESENTATION_ITEM('')
SURFACE()
);
#591=(
BOUNDED_SURFACE()
B_SPLINE_SURFACE(3,2,((#113333,#113334,#113335),(#113336,#113337,#113338),
(#113339,#113340,#113341),(#113342,#113343,#113344)),.UNSPECIFIED.,.F.,
 .F.,.F.)
B_SPLINE_SURFACE_WITH_KNOTS((4,4),(3,3),(5.99960283367362,6.033768017184),
(0.,1.),.UNSPECIFIED.)
GEOMETRIC_REPRESENTATION_ITEM()
RATIONAL_B_SPLINE_SURFACE(((1.,0.733872823887339,1.),(1.,0.733960040443134,
1.),(1.,0.73404212870921,1.),(1.,0.734119045965882,1.)))
REPRESENTATION_ITEM('')
SURFACE()
);
#592=(
BOUNDED_SURFACE()
B_SPLINE_SURFACE(3,2,((#113352,#113353,#113354),(#113355,#113356,#113357),
(#113358,#113359,#113360),(#113361,#113362,#113363),(#113364,#113365,#113366),
(#113367,#113368,#113369),(#113370,#113371,#113372),(#113373,#113374,#113375),
(#113376,#113377,#113378),(#113379,#113380,#113381),(#113382,#113383,#113384),
(#113385,#113386,#113387),(#113388,#113389,#113390),(#113391,#113392,#113393)),
 .UNSPECIFIED.,.F.,.F.,.F.)
B_SPLINE_SURFACE_WITH_KNOTS((4,2,2,2,2,2,4),(3,3),(0.,0.000414447455451902,
0.000828894910903804,0.00124334236635571,0.00165778982180761,0.00248668473271141,
0.00331557964361522),(0.,1.),.UNSPECIFIED.)
GEOMETRIC_REPRESENTATION_ITEM()
RATIONAL_B_SPLINE_SURFACE(((1.,0.890481625303935,1.),(1.,0.891303010279246,
1.),(1.,0.890914616712163,1.),(1.,0.887789449824786,1.),(1.,0.885009863471109,
1.),(1.,0.877443879429436,1.),(1.,0.872578483482848,1.),(1.,0.861146326601627,
1.),(1.,0.854626508469641,1.),(1.,0.832750509677,1.),(1.,0.815509922452662,
1.),(1.,0.777149977595946,1.),(1.,0.756503242220823,1.),(1.,0.734119045965882,
1.)))
REPRESENTATION_ITEM('')
SURFACE()
);
#593=(
BOUNDED_SURFACE()
B_SPLINE_SURFACE(3,2,((#113431,#113432,#113433),(#113434,#113435,#113436),
(#113437,#113438,#113439),(#113440,#113441,#113442),(#113443,#113444,#113445),
(#113446,#113447,#113448),(#113449,#113450,#113451),(#113452,#113453,#113454),
(#113455,#113456,#113457),(#113458,#113459,#113460)),.UNSPECIFIED.,.F.,
 .F.,.F.)
B_SPLINE_SURFACE_WITH_KNOTS((4,2,2,2,4),(3,3),(-1.06801387275505E-5,0.0009540784253913,
0.0019081568507826,0.0028622352761739,0.00382699486680193),(-1.06811652367319E-5,
1.),.UNSPECIFIED.)
GEOMETRIC_REPRESENTATION_ITEM()
RATIONAL_B_SPLINE_SURFACE(((1.00000837279558,0.608057951056344,1.),(1.00000819656107,
0.616307729918506,1.),(1.00000800898926,0.625088223930733,1.),(1.00000762098965,
0.643251018092253,1.),(1.00000741879575,0.652715992007046,1.),(1.00000702092439,
0.671340896301756,1.),(1.00000682343963,0.680585428570017,1.),(1.00000642956295,
0.699023336506384,1.),(1.00000623859141,0.707962976091363,1.),(1.00000605439602,
0.71658541529227,1.)))
REPRESENTATION_ITEM('')
SURFACE()
);
#594=(
BOUNDED_SURFACE()
B_SPLINE_SURFACE(3,2,((#113488,#113489,#113490),(#113491,#113492,#113493),
(#113494,#113495,#113496),(#113497,#113498,#113499),(#113500,#113501,#113502),
(#113503,#113504,#113505),(#113506,#113507,#113508),(#113509,#113510,#113511),
(#113512,#113513,#113514),(#113515,#113516,#113517)),.UNSPECIFIED.,.F.,
 .F.,.F.)
B_SPLINE_SURFACE_WITH_KNOTS((4,2,2,2,4),(3,3),(1.16559650901717,1.54520562132594,
1.92481473363471,2.30442384594348,2.68403295825224),(0.,1.),
 .UNSPECIFIED.)
GEOMETRIC_REPRESENTATION_ITEM()
RATIONAL_B_SPLINE_SURFACE(((1.,0.716301943424656,1.),(1.,0.713607614150078,
1.),(1.,0.710674555327822,1.),(1.,0.704739985554641,1.),(1.,0.701739588150069,
1.),(1.,0.696101208315963,1.),(1.,0.693465451199519,1.),(1.,0.688950852263354,
1.),(1.,0.687071980767171,1.),(1.,0.685720793081262,1.)))
REPRESENTATION_ITEM('')
SURFACE()
);
#595=(
BOUNDED_SURFACE()
B_SPLINE_SURFACE(3,2,((#113530,#113531,#113532),(#113533,#113534,#113535),
(#113536,#113537,#113538),(#113539,#113540,#113541)),.UNSPECIFIED.,.F.,
 .F.,.F.)
B_SPLINE_SURFACE_WITH_KNOTS((4,4),(3,3),(0.,0.0161950908918461),(0.,1.),
 .UNSPECIFIED.)
GEOMETRIC_REPRESENTATION_ITEM()
RATIONAL_B_SPLINE_SURFACE(((1.,0.976157924905098,1.),(1.,0.976367599349397,
1.),(1.,0.976614896609145,1.),(1.,0.976883313735806,1.)))
REPRESENTATION_ITEM('')
SURFACE()
);
#596=(
BOUNDED_SURFACE()
B_SPLINE_SURFACE(3,2,((#113556,#113557,#113558),(#113559,#113560,#113561),
(#113562,#113563,#113564),(#113565,#113566,#113567)),.UNSPECIFIED.,.F.,
 .F.,.F.)
B_SPLINE_SURFACE_WITH_KNOTS((4,4),(3,3),(-3.03368441478824E-14,0.0159404471931817),
(0.,1.),.UNSPECIFIED.)
GEOMETRIC_REPRESENTATION_ITEM()
RATIONAL_B_SPLINE_SURFACE(((1.,0.911288565719558,1.),(1.,0.915143187555718,
1.),(1.,0.918922299745003,1.),(1.,0.922592471504009,1.)))
REPRESENTATION_ITEM('')
SURFACE()
);
#597=(
BOUNDED_SURFACE()
B_SPLINE_SURFACE(3,2,((#113576,#113577,#113578),(#113579,#113580,#113581),
(#113582,#113583,#113584),(#113585,#113586,#113587),(#113588,#113589,#113590),
(#113591,#113592,#113593)),.UNSPECIFIED.,.F.,.F.,.F.)
B_SPLINE_SURFACE_WITH_KNOTS((4,2,4),(3,3),(-2.24026526496335E-14,0.00397039644342791,
0.00794079288687823),(0.,1.),.UNSPECIFIED.)
GEOMETRIC_REPRESENTATION_ITEM()
RATIONAL_B_SPLINE_SURFACE(((1.,0.947706007031944,1.),(1.,0.943290905726768,
1.),(1.,0.937899255743185,1.),(1.,0.925617229079056,1.),(1.,0.918682504022431,
1.),(1.,0.911288565719537,1.)))
REPRESENTATION_ITEM('')
SURFACE()
);
#598=(
BOUNDED_SURFACE()
B_SPLINE_SURFACE(3,2,((#113618,#113619,#113620),(#113621,#113622,#113623),
(#113624,#113625,#113626),(#113627,#113628,#113629)),.UNSPECIFIED.,.F.,
 .F.,.F.)
B_SPLINE_SURFACE_WITH_KNOTS((4,4),(3,3),(4.33680868994202E-19,0.00126990317435772),
(0.,1.),.UNSPECIFIED.)
GEOMETRIC_REPRESENTATION_ITEM()
RATIONAL_B_SPLINE_SURFACE(((1.,0.946914839885651,1.),(1.,0.947185375384126,
1.),(1.,0.94744899710587,1.),(1.,0.947706007032018,1.)))
REPRESENTATION_ITEM('')
SURFACE()
);
#599=(
BOUNDED_SURFACE()
B_SPLINE_SURFACE(3,2,((#113708,#113709,#113710),(#113711,#113712,#113713),
(#113714,#113715,#113716),(#113717,#113718,#113719)),.UNSPECIFIED.,.F.,
 .F.,.F.)
B_SPLINE_SURFACE_WITH_KNOTS((4,4),(3,3),(4.08374095581965,4.36299363613899),
(0.,1.),.UNSPECIFIED.)
GEOMETRIC_REPRESENTATION_ITEM()
RATIONAL_B_SPLINE_SURFACE(((1.,0.727993861800628,1.),(1.,0.725358409252166,
1.),(1.,0.722438933497413,1.),(1.,0.719339800338651,1.)))
REPRESENTATION_ITEM('')
SURFACE()
);
#600=(
BOUNDED_SURFACE()
B_SPLINE_SURFACE(3,2,((#113725,#113726,#113727),(#113728,#113729,#113730),
(#113731,#113732,#113733),(#113734,#113735,#113736)),.UNSPECIFIED.,.F.,
 .F.,.F.)
B_SPLINE_SURFACE_WITH_KNOTS((4,4),(3,3),(0.,0.00605799761929958),(0.,1.),
 .UNSPECIFIED.)
GEOMETRIC_REPRESENTATION_ITEM()
RATIONAL_B_SPLINE_SURFACE(((1.,0.912647878274364,1.),(1.,0.914084485860509,
1.),(1.,0.915454999630057,1.),(1.,0.916720713557935,1.)))
REPRESENTATION_ITEM('')
SURFACE()
);
#601=(
BOUNDED_SURFACE()
B_SPLINE_SURFACE(3,2,((#113745,#113746,#113747),(#113748,#113749,#113750),
(#113751,#113752,#113753),(#113754,#113755,#113756)),.UNSPECIFIED.,.F.,
 .F.,.F.)
B_SPLINE_SURFACE_WITH_KNOTS((4,4),(3,3),(0.,7.18262239638743E-5),(0.,1.),
 .UNSPECIFIED.)
GEOMETRIC_REPRESENTATION_ITEM()
RATIONAL_B_SPLINE_SURFACE(((1.,0.728225219383198,1.),(1.,0.726275191780839,
1.),(1.,0.724316874979356,1.),(1.,0.722350066311196,1.)))
REPRESENTATION_ITEM('')
SURFACE()
);
#602=(
BOUNDED_SURFACE()
B_SPLINE_SURFACE(3,2,((#113765,#113766,#113767),(#113768,#113769,#113770),
(#113771,#113772,#113773),(#113774,#113775,#113776)),.UNSPECIFIED.,.F.,
 .F.,.F.)
B_SPLINE_SURFACE_WITH_KNOTS((4,4),(3,3),(0.,0.00758323617980971),(0.,1.),
 .UNSPECIFIED.)
GEOMETRIC_REPRESENTATION_ITEM()
RATIONAL_B_SPLINE_SURFACE(((1.,0.811835924523642,1.),(1.,0.814044973262778,
1.),(1.,0.816215843750299,1.),(1.,0.818352309267362,1.)))
REPRESENTATION_ITEM('')
SURFACE()
);
#603=(
BOUNDED_SURFACE()
B_SPLINE_SURFACE(3,2,((#113873,#113874,#113875),(#113876,#113877,#113878),
(#113879,#113880,#113881),(#113882,#113883,#113884)),.UNSPECIFIED.,.F.,
 .F.,.F.)
B_SPLINE_SURFACE_WITH_KNOTS((4,4),(3,3),(0.0393483234013691,0.0610219850016298),
(0.,1.),.UNSPECIFIED.)
GEOMETRIC_REPRESENTATION_ITEM()
RATIONAL_B_SPLINE_SURFACE(((1.,0.905262410070289,1.),(1.,0.908795397039033,
1.),(1.,0.912689368496651,1.),(1.,0.917052864030178,1.)))
REPRESENTATION_ITEM('')
SURFACE()
);
#604=(
BOUNDED_SURFACE()
B_SPLINE_SURFACE(3,2,((#113891,#113892,#113893),(#113894,#113895,#113896),
(#113897,#113898,#113899),(#113900,#113901,#113902)),.UNSPECIFIED.,.F.,
 .F.,.F.)
B_SPLINE_SURFACE_WITH_KNOTS((4,4),(3,3),(0.,0.00153857998417576),(0.,1.),
 .UNSPECIFIED.)
GEOMETRIC_REPRESENTATION_ITEM()
RATIONAL_B_SPLINE_SURFACE(((1.,0.608336311218929,1.),(1.,0.601387010374271,
1.),(1.,0.595157345581303,1.),(1.,0.589755109947518,1.)))
REPRESENTATION_ITEM('')
SURFACE()
);
#605=(
BOUNDED_SURFACE()
B_SPLINE_SURFACE(3,2,((#113906,#113907,#113908),(#113909,#113910,#113911),
(#113912,#113913,#113914),(#113915,#113916,#113917),(#113918,#113919,#113920),
(#113921,#113922,#113923),(#113924,#113925,#113926),(#113927,#113928,#113929),
(#113930,#113931,#113932),(#113933,#113934,#113935)),.UNSPECIFIED.,.F.,
 .F.,.F.)
B_SPLINE_SURFACE_WITH_KNOTS((4,2,2,2,4),(3,3),(-1.5964277061233E-5,0.000343828344704275,
0.00068765668940855,0.00103148503411282,0.00139127765587163),(-2.89283144912663E-5,
1.),.UNSPECIFIED.)
GEOMETRIC_REPRESENTATION_ITEM()
RATIONAL_B_SPLINE_SURFACE(((1.00000765488376,0.86769219186571,0.999999999999999),
(1.00000722690563,0.875089410421199,1.),(1.00000686919773,0.881272071148261,
1.),(1.00000631671154,0.890821299878408,1.),(1.00000611843525,0.894248327990035,
1.),(1.00000589540735,0.898103165360087,1.),(1.00000586777608,0.898580747267181,
1.),(1.00000599133138,0.896445204553244,1.),(1.00000614758786,0.893744451270688,
1.),(1.00000639463024,0.889474544999623,0.999999999999999)))
REPRESENTATION_ITEM('')
SURFACE()
);
#606=(
BOUNDED_SURFACE()
B_SPLINE_SURFACE(3,2,((#113950,#113951,#113952),(#113953,#113954,#113955),
(#113956,#113957,#113958),(#113959,#113960,#113961)),.UNSPECIFIED.,.F.,
 .F.,.F.)
B_SPLINE_SURFACE_WITH_KNOTS((4,4),(3,3),(-3.94649590784724E-17,0.000835249893958165),
(0.,1.),.UNSPECIFIED.)
GEOMETRIC_REPRESENTATION_ITEM()
RATIONAL_B_SPLINE_SURFACE(((1.,0.869484290934539,1.),(1.,0.869214625090537,
1.),(1.,0.868944351226567,1.),(1.,0.868673470877847,1.)))
REPRESENTATION_ITEM('')
SURFACE()
);
#607=(
BOUNDED_SURFACE()
B_SPLINE_SURFACE(3,2,((#113965,#113966,#113967),(#113968,#113969,#113970),
(#113971,#113972,#113973),(#113974,#113975,#113976),(#113977,#113978,#113979),
(#113980,#113981,#113982)),.UNSPECIFIED.,.F.,.F.,.F.)
B_SPLINE_SURFACE_WITH_KNOTS((4,2,4),(3,3),(-8.91980549011868E-6,0.001497612431705,
0.00300414466889881),(-1.17742484379691E-5,1.),.UNSPECIFIED.)
GEOMETRIC_REPRESENTATION_ITEM()
RATIONAL_B_SPLINE_SURFACE(((1.00000307675079,0.869344068989187,1.),(1.00000289283005,
0.877154365180478,1.),(1.0000027185999,0.884553145244771,1.),(1.00000239153912,
0.898441963192688,1.),(1.000002238683,0.904933082601953,1.),(1.00000209845121,
0.910888103766793,1.)))
REPRESENTATION_ITEM('')
SURFACE()
);
#608=(
BOUNDED_SURFACE()
B_SPLINE_SURFACE(3,2,((#114001,#114002,#114003),(#114004,#114005,#114006),
(#114007,#114008,#114009),(#114010,#114011,#114012)),.UNSPECIFIED.,.F.,
 .F.,.F.)
B_SPLINE_SURFACE_WITH_KNOTS((4,4),(3,3),(-1.73472347597681E-17,0.00375203846914061),
(0.,1.),.UNSPECIFIED.)
GEOMETRIC_REPRESENTATION_ITEM()
RATIONAL_B_SPLINE_SURFACE(((1.,0.910783323232916,1.),(1.,0.911714422255635,
1.),(1.,0.912589058899092,1.),(1.,0.913412403204132,1.)))
REPRESENTATION_ITEM('')
SURFACE()
);
#609=(
BOUNDED_SURFACE()
B_SPLINE_SURFACE(3,2,((#114019,#114020,#114021),(#114022,#114023,#114024),
(#114025,#114026,#114027),(#114028,#114029,#114030),(#114031,#114032,#114033),
(#114034,#114035,#114036)),.UNSPECIFIED.,.F.,.F.,.F.)
B_SPLINE_SURFACE_WITH_KNOTS((4,2,4),(3,3),(-3.29892363426509E-14,0.00404703200072792,
0.00809406400148883),(0.,1.),.UNSPECIFIED.)
GEOMETRIC_REPRESENTATION_ITEM()
RATIONAL_B_SPLINE_SURFACE(((1.,0.865453150578059,1.),(1.,0.874644279551737,
1.),(1.,0.883264705345191,1.),(1.,0.899294063501222,1.),(1.,0.906705043203737,
1.),(1.,0.913412403204139,1.)))
REPRESENTATION_ITEM('')
SURFACE()
);
#610=(
BOUNDED_SURFACE()
B_SPLINE_SURFACE(3,2,((#114058,#114059,#114060),(#114061,#114062,#114063),
(#114064,#114065,#114066),(#114067,#114068,#114069)),.UNSPECIFIED.,.F.,
 .F.,.F.)
B_SPLINE_SURFACE_WITH_KNOTS((4,4),(3,3),(0.,0.0152812745441608),(0.,1.),
 .UNSPECIFIED.)
GEOMETRIC_REPRESENTATION_ITEM()
RATIONAL_B_SPLINE_SURFACE(((1.,0.865453150577834,1.),(1.,0.869899202704847,
1.),(1.,0.874400987430265,1.),(1.,0.878926677386226,1.)))
REPRESENTATION_ITEM('')
SURFACE()
);
#611=(
BOUNDED_SURFACE()
B_SPLINE_SURFACE(3,2,((#114076,#114077,#114078),(#114079,#114080,#114081),
(#114082,#114083,#114084),(#114085,#114086,#114087)),.UNSPECIFIED.,.F.,
 .F.,.F.)
B_SPLINE_SURFACE_WITH_KNOTS((4,4),(3,3),(0.,0.0152812745441608),(0.,1.),
 .UNSPECIFIED.)
GEOMETRIC_REPRESENTATION_ITEM()
RATIONAL_B_SPLINE_SURFACE(((1.,0.865453150577834,1.),(1.,0.869899202704847,
1.),(1.,0.874400987430265,1.),(1.,0.878926677386226,1.)))
REPRESENTATION_ITEM('')
SURFACE()
);
#612=(
BOUNDED_SURFACE()
B_SPLINE_SURFACE(3,2,((#114096,#114097,#114098),(#114099,#114100,#114101),
(#114102,#114103,#114104),(#114105,#114106,#114107),(#114108,#114109,#114110),
(#114111,#114112,#114113)),.UNSPECIFIED.,.F.,.F.,.F.)
B_SPLINE_SURFACE_WITH_KNOTS((4,2,4),(3,3),(-3.29892363426509E-14,0.00404703200072792,
0.00809406400148883),(0.,1.),.UNSPECIFIED.)
GEOMETRIC_REPRESENTATION_ITEM()
RATIONAL_B_SPLINE_SURFACE(((1.,0.865453150578059,1.),(1.,0.874644279550556,
1.),(1.,0.883264705346764,1.),(1.,0.899294063499649,1.),(1.,0.906705043204919,
1.),(1.,0.913412403204139,1.)))
REPRESENTATION_ITEM('')
SURFACE()
);
#613=(
BOUNDED_SURFACE()
B_SPLINE_SURFACE(3,2,((#114135,#114136,#114137),(#114138,#114139,#114140),
(#114141,#114142,#114143),(#114144,#114145,#114146)),.UNSPECIFIED.,.F.,
 .F.,.F.)
B_SPLINE_SURFACE_WITH_KNOTS((4,4),(3,3),(-1.73472347597681E-17,0.00375203846914061),
(0.,1.),.UNSPECIFIED.)
GEOMETRIC_REPRESENTATION_ITEM()
RATIONAL_B_SPLINE_SURFACE(((1.,0.910783323232916,1.),(1.,0.911714422255635,
1.),(1.,0.912589058899092,1.),(1.,0.913412403204132,1.)))
REPRESENTATION_ITEM('')
SURFACE()
);
#614=(
BOUNDED_SURFACE()
B_SPLINE_SURFACE(3,2,((#114153,#114154,#114155),(#114156,#114157,#114158),
(#114159,#114160,#114161),(#114162,#114163,#114164),(#114165,#114166,#114167),
(#114168,#114169,#114170)),.UNSPECIFIED.,.F.,.F.,.F.)
B_SPLINE_SURFACE_WITH_KNOTS((4,2,4),(3,3),(-8.91980552047379E-6,0.001497612431705,
0.00300414466892919),(0.,1.00001177424863),.UNSPECIFIED.)
GEOMETRIC_REPRESENTATION_ITEM()
RATIONAL_B_SPLINE_SURFACE(((1.,0.86934406898869,1.00000307675084),(1.,0.877154365180156,
1.0000028928301),(1.,0.884553145244609,1.00000271859995),(1.,0.898441963192809,
1.00000239153915),(1.,0.904933082602197,1.00000223868305),(1.,0.910888103767136,
1.00000209845124)))
REPRESENTATION_ITEM('')
SURFACE()
);
#615=(
BOUNDED_SURFACE()
B_SPLINE_SURFACE(3,2,((#114189,#114190,#114191),(#114192,#114193,#114194),
(#114195,#114196,#114197),(#114198,#114199,#114200)),.UNSPECIFIED.,.F.,
 .F.,.F.)
B_SPLINE_SURFACE_WITH_KNOTS((4,4),(3,3),(-3.94649590784724E-17,0.000835249893958165),
(0.,1.),.UNSPECIFIED.)
GEOMETRIC_REPRESENTATION_ITEM()
RATIONAL_B_SPLINE_SURFACE(((1.,0.869484290934539,1.),(1.,0.869214625090537,
1.),(1.,0.868944351226567,1.),(1.,0.868673470877847,1.)))
REPRESENTATION_ITEM('')
SURFACE()
);
#616=(
BOUNDED_SURFACE()
B_SPLINE_SURFACE(3,2,((#114204,#114205,#114206),(#114207,#114208,#114209),
(#114210,#114211,#114212),(#114213,#114214,#114215),(#114216,#114217,#114218),
(#114219,#114220,#114221),(#114222,#114223,#114224),(#114225,#114226,#114227),
(#114228,#114229,#114230),(#114231,#114232,#114233)),.UNSPECIFIED.,.F.,
 .F.,.F.)
B_SPLINE_SURFACE_WITH_KNOTS((4,2,2,2,4),(3,3),(-1.59642745456183E-5,0.00034382834470427,
0.000687656689408541,0.00103148503411281,0.00139127765335605),(0.,1.00002892833383),
 .UNSPECIFIED.)
GEOMETRIC_REPRESENTATION_ITEM()
RATIONAL_B_SPLINE_SURFACE(((1.,0.867692192018306,1.00000765488887),(1.,
0.875089410505293,1.00000722691046),(1.,0.881272071180052,1.00000686920232),
(1.,0.890821299876333,1.00000631671577),(1.,0.894248327985298,1.00000611843934),
(1.,0.89810316536079,1.0000058954113),(1.,0.898580747265917,1.00000586778),
(1.,0.896445204558151,1.00000599133539),(1.,0.893744451307029,1.00000614759197),
(1.,0.889474545086965,1.00000639463451)))
REPRESENTATION_ITEM('')
SURFACE()
);
#617=(
BOUNDED_SURFACE()
B_SPLINE_SURFACE(3,2,((#114246,#114247,#114248),(#114249,#114250,#114251),
(#114252,#114253,#114254),(#114255,#114256,#114257)),.UNSPECIFIED.,.F.,
 .F.,.F.)
B_SPLINE_SURFACE_WITH_KNOTS((4,4),(3,3),(-4.5102810375397E-17,0.0292885711597344),
(0.,1.),.UNSPECIFIED.)
GEOMETRIC_REPRESENTATION_ITEM()
RATIONAL_B_SPLINE_SURFACE(((1.,0.889854963301628,1.),(1.,0.889922782975962,
1.),(1.,0.889983128032778,1.),(1.,0.890036831842682,1.)))
REPRESENTATION_ITEM('')
SURFACE()
);
#618=(
BOUNDED_SURFACE()
B_SPLINE_SURFACE(3,2,((#114278,#114279,#114280),(#114281,#114282,#114283),
(#114284,#114285,#114286),(#114287,#114288,#114289)),.UNSPECIFIED.,.F.,
 .F.,.F.)
B_SPLINE_SURFACE_WITH_KNOTS((4,4),(3,3),(0.,0.00403489138707174),(0.,1.),
 .UNSPECIFIED.)
GEOMETRIC_REPRESENTATION_ITEM()
RATIONAL_B_SPLINE_SURFACE(((1.,0.890729059349979,1.),(1.,0.892929970125377,
1.),(1.,0.892737895581488,1.),(1.,0.890168628311666,1.)))
REPRESENTATION_ITEM('')
SURFACE()
);
#619=(
BOUNDED_SURFACE()
B_SPLINE_SURFACE(3,2,((#114346,#114347,#114348),(#114349,#114350,#114351),
(#114352,#114353,#114354),(#114355,#114356,#114357)),.UNSPECIFIED.,.F.,
 .F.,.F.)
B_SPLINE_SURFACE_WITH_KNOTS((4,4),(3,3),(6.10851723741774,6.28318530717958),
(0.,1.),.UNSPECIFIED.)
GEOMETRIC_REPRESENTATION_ITEM()
RATIONAL_B_SPLINE_SURFACE(((1.,0.734549265105342,1.),(1.,0.734826018905293,
1.),(1.,0.734965302968929,1.),(1.,0.734965235770397,1.)))
REPRESENTATION_ITEM('')
SURFACE()
);
#620=(
BOUNDED_SURFACE()
B_SPLINE_SURFACE(3,2,((#114365,#114366,#114367),(#114368,#114369,#114370),
(#114371,#114372,#114373),(#114374,#114375,#114376)),.UNSPECIFIED.,.F.,
 .F.,.F.)
B_SPLINE_SURFACE_WITH_KNOTS((4,4),(3,3),(5.482861048306,6.10851723741774),
(0.,1.),.UNSPECIFIED.)
GEOMETRIC_REPRESENTATION_ITEM()
RATIONAL_B_SPLINE_SURFACE(((1.,0.726622376373739,1.),(1.,0.730769542955845,
1.),(1.,0.733568608656966,1.),(1.,0.73454926510534,1.)))
REPRESENTATION_ITEM('')
SURFACE()
);
#621=(
BOUNDED_SURFACE()
B_SPLINE_SURFACE(3,2,((#114387,#114388,#114389),(#114390,#114391,#114392),
(#114393,#114394,#114395),(#114396,#114397,#114398),(#114399,#114400,#114401),
(#114402,#114403,#114404)),.UNSPECIFIED.,.F.,.F.,.F.)
B_SPLINE_SURFACE_WITH_KNOTS((4,2,4),(3,3),(5.48335331197424,5.88341675927563,
6.28348020657704),(-0.00029489939745294,1.),.UNSPECIFIED.)
GEOMETRIC_REPRESENTATION_ITEM()
RATIONAL_B_SPLINE_SURFACE(((1.00017850677262,0.697342934304514,1.),(1.00017929658357,
0.696003814995437,1.),(1.00017993112942,0.694927946657765,1.),(1.00018079117325,
0.693469747963846,1.),(1.00018101642737,0.693087831079407,1.),(1.00018101495123,
0.693090333872477,1.)))
REPRESENTATION_ITEM('')
SURFACE()
);
#622=(
BOUNDED_SURFACE()
B_SPLINE_SURFACE(3,2,((#114415,#114416,#114417),(#114418,#114419,#114420),
(#114421,#114422,#114423),(#114424,#114425,#114426),(#114427,#114428,#114429),
(#114430,#114431,#114432),(#114433,#114434,#114435),(#114436,#114437,#114438),
(#114439,#114440,#114441),(#114442,#114443,#114444)),.UNSPECIFIED.,.F.,
 .F.,.F.)
B_SPLINE_SURFACE_WITH_KNOTS((4,2,2,2,4),(3,3),(2.67887376368581,2.99443776011378,
3.31000175654175,3.62556575296971,3.94112974939768),(0.,1.),
 .UNSPECIFIED.)
GEOMETRIC_REPRESENTATION_ITEM()
RATIONAL_B_SPLINE_SURFACE(((1.,0.694658370458991,1.),(1.,0.693998600341011,
1.),(1.,0.693549705371944,1.),(1.,0.693115921555998,1.),(1.,0.693131851553411,
1.),(1.,0.693627699474438,1.),(1.,0.694107510405834,1.),(1.,0.695481189759094,
1.),(1.,0.696374187049707,1.),(1.,0.697429201358512,1.)))
REPRESENTATION_ITEM('')
SURFACE()
);
#623=(
BOUNDED_SURFACE()
B_SPLINE_SURFACE(3,2,((#114464,#114465,#114466),(#114467,#114468,#114469),
(#114470,#114471,#114472),(#114473,#114474,#114475)),.UNSPECIFIED.,.F.,
 .F.,.F.)
B_SPLINE_SURFACE_WITH_KNOTS((4,4),(3,3),(3.31626072335165,3.94191691246337),
(0.,1.),.UNSPECIFIED.)
GEOMETRIC_REPRESENTATION_ITEM()
RATIONAL_B_SPLINE_SURFACE(((1.,0.734549265105337,1.),(1.,0.73356860865697,
1.),(1.,0.730769542955845,1.),(1.,0.72662237637374,1.)))
REPRESENTATION_ITEM('')
SURFACE()
);
#624=(
BOUNDED_SURFACE()
B_SPLINE_SURFACE(3,2,((#114483,#114484,#114485),(#114486,#114487,#114488),
(#114489,#114490,#114491),(#114492,#114493,#114494),(#114495,#114496,#114497),
(#114498,#114499,#114500)),.UNSPECIFIED.,.F.,.F.,.F.)
B_SPLINE_SURFACE_WITH_KNOTS((4,2,4),(3,3),(2.44080513759545,2.87859723954995,
3.31638934150445),(0.,1.0001286181528),.UNSPECIFIED.)
GEOMETRIC_REPRESENTATION_ITEM()
RATIONAL_B_SPLINE_SURFACE(((1.,0.728460992664992,1.00006984969107),(1.,
0.73106026635799,1.00006918106351),(1.,0.732952351582169,1.0000686943505),
(1.,0.735029013399507,1.00006816015768),(1.,0.735213247522441,1.00006811276598),
(1.,0.734514507706258,1.00006829250723)))
REPRESENTATION_ITEM('')
SURFACE()
);
#625=(
BOUNDED_SURFACE()
B_SPLINE_SURFACE(3,2,((#114549,#114550,#114551),(#114552,#114553,#114554),
(#114555,#114556,#114557),(#114558,#114559,#114560)),.UNSPECIFIED.,.F.,
 .F.,.F.)
B_SPLINE_SURFACE_WITH_KNOTS((4,4),(3,3),(-5.89805981832114E-17,0.0142595610833898),
(0.,1.),.UNSPECIFIED.)
GEOMETRIC_REPRESENTATION_ITEM()
RATIONAL_B_SPLINE_SURFACE(((1.,0.733870268857972,1.),(1.,0.733953171943022,
1.),(1.,0.734032405578643,1.),(1.,0.734107244895841,1.)))
REPRESENTATION_ITEM('')
SURFACE()
);
#626=(
BOUNDED_SURFACE()
B_SPLINE_SURFACE(3,2,((#114568,#114569,#114570),(#114571,#114572,#114573),
(#114574,#114575,#114576),(#114577,#114578,#114579),(#114580,#114581,#114582),
(#114583,#114584,#114585),(#114586,#114587,#114588),(#114589,#114590,#114591),
(#114592,#114593,#114594),(#114595,#114596,#114597),(#114598,#114599,#114600),
(#114601,#114602,#114603),(#114604,#114605,#114606),(#114607,#114608,#114609),
(#114610,#114611,#114612),(#114613,#114614,#114615)),.UNSPECIFIED.,.F.,
 .F.,.F.)
B_SPLINE_SURFACE_WITH_KNOTS((4,2,2,2,2,2,2,4),(3,3),(-4.29955091915017E-5,
0.00123841412024767,0.0018576211803715,0.00247682824049534,0.00309603530061917,
0.003715242360743,0.00433444942086684,0.00499665199018221),(0.,1.00008054792824),
 .UNSPECIFIED.)
GEOMETRIC_REPRESENTATION_ITEM()
RATIONAL_B_SPLINE_SURFACE(((1.,0.731748275798928,1.00004321424126),(1.,
0.755034869195115,1.00003946286755),(1.,0.776401252978797,1.00003602083166),
(1.,0.805713753560762,1.00003129870927),(1.,0.814931110221513,1.00002981383131),
(1.,0.831989371626276,1.00002706581607),(1.,0.839910892552358,1.00002578969187),
(1.,0.854514178312312,1.00002343716305),(1.,0.861180890877233,1.00002236318328),
(1.,0.872617206617934,1.0000205208402),(1.,0.877505787404721,1.00001973331009),
(1.,0.885201791626106,1.0000184935157),(1.,0.887933849900884,1.00001805339243),
(1.,0.891232943773537,1.00001752192208),(1.,0.891614266807627,1.00001746049252),
(0.999999999999999,0.89052807277479,1.00001763547388)))
REPRESENTATION_ITEM('')
SURFACE()
);
#627=(
BOUNDED_SURFACE()
B_SPLINE_SURFACE(3,2,((#114670,#114671,#114672),(#114673,#114674,#114675),
(#114676,#114677,#114678),(#114679,#114680,#114681)),.UNSPECIFIED.,.F.,
 .F.,.F.)
B_SPLINE_SURFACE_WITH_KNOTS((4,4),(3,3),(0.0918733685313422,0.0952495810713483),
(-8.72438616605373E-7,1.00000087243862),.UNSPECIFIED.)
GEOMETRIC_REPRESENTATION_ITEM()
RATIONAL_B_SPLINE_SURFACE(((1.00000001798427,0.989693092860092,1.00000001798427),
(1.00000001805102,0.989654838255598,1.00000001805102),(1.00000001812737,
0.98961107952104,1.00000001812737),(1.00000001821309,0.989561956653783,
1.00000001821309)))
REPRESENTATION_ITEM('')
SURFACE()
);
#628=(
BOUNDED_SURFACE()
B_SPLINE_SURFACE(3,2,((#114690,#114691,#114692),(#114693,#114694,#114695),
(#114696,#114697,#114698),(#114699,#114700,#114701),(#114702,#114703,#114704),
(#114705,#114706,#114707),(#114708,#114709,#114710),(#114711,#114712,#114713),
(#114714,#114715,#114716),(#114717,#114718,#114719),(#114720,#114721,#114722),
(#114723,#114724,#114725),(#114726,#114727,#114728),(#114729,#114730,#114731),
(#114732,#114733,#114734),(#114735,#114736,#114737)),.UNSPECIFIED.,.F.,
 .F.,.F.)
B_SPLINE_SURFACE_WITH_KNOTS((4,2,2,2,2,2,2,4),(3,3),(-4.29955091920558E-5,
0.00123841412024767,0.0018576211803715,0.00247682824049534,0.00309603530061917,
0.003715242360743,0.00433444942086684,0.00499665199018269),(-8.05479293447011E-5,
1.),.UNSPECIFIED.)
GEOMETRIC_REPRESENTATION_ITEM()
RATIONAL_B_SPLINE_SURFACE(((1.00004321424185,0.731748275798664,1.),(1.00003946286809,
0.755034869194199,1.),(1.00003602083215,0.776401252979281,1.),(1.0000312987097,
0.805713753560191,1.),(1.00002981383172,0.814931110221308,1.),(1.00002706581644,
0.831989371626091,1.),(1.00002578969223,0.839910892552181,1.),(1.00002343716337,
0.854514178312151,1.),(1.00002236318359,0.86118089087708,1.),(1.00002052084049,
0.872617206617794,1.),(1.00001973331036,0.877505787404587,1.),(1.00001849351596,
0.885201791625979,1.),(1.00001805339268,0.887933849900761,1.),(1.00001752192232,
0.891232943773419,1.),(1.00001746049276,0.891614266807508,1.),(1.00001763547412,
0.890528072774668,1.)))
REPRESENTATION_ITEM('')
SURFACE()
);
#629=(
BOUNDED_SURFACE()
B_SPLINE_SURFACE(3,2,((#114809,#114810,#114811),(#114812,#114813,#114814),
(#114815,#114816,#114817),(#114818,#114819,#114820),(#114821,#114822,#114823),
(#114824,#114825,#114826)),.UNSPECIFIED.,.F.,.F.,.F.)
B_SPLINE_SURFACE_WITH_KNOTS((4,2,4),(3,3),(2.44080513759545,2.87859723954995,
3.31638934150445),(-0.000128618152794861,1.),.UNSPECIFIED.)
GEOMETRIC_REPRESENTATION_ITEM()
RATIONAL_B_SPLINE_SURFACE(((1.00006984969107,0.728460992664993,1.),(1.00006918106351,
0.731060266357991,1.),(1.0000686943505,0.732952351582169,1.),(1.00006816015768,
0.735029013399507,1.),(1.00006811276598,0.735213247522442,1.),(1.00006829250722,
0.734514507706258,1.)))
REPRESENTATION_ITEM('')
SURFACE()
);
#630=(
BOUNDED_SURFACE()
B_SPLINE_SURFACE(3,2,((#114887,#114888,#114889),(#114890,#114891,#114892),
(#114893,#114894,#114895),(#114896,#114897,#114898)),.UNSPECIFIED.,.F.,
 .F.,.F.)
B_SPLINE_SURFACE_WITH_KNOTS((4,4),(3,3),(3.31626072335165,3.94191691246337),
(0.,1.),.UNSPECIFIED.)
GEOMETRIC_REPRESENTATION_ITEM()
RATIONAL_B_SPLINE_SURFACE(((1.,0.734549265105337,1.),(1.,0.73356860865697,
1.),(1.,0.730769542955845,1.),(1.,0.72662237637374,1.)))
REPRESENTATION_ITEM('')
SURFACE()
);
#631=(
BOUNDED_SURFACE()
B_SPLINE_SURFACE(3,2,((#114905,#114906,#114907),(#114908,#114909,#114910),
(#114911,#114912,#114913),(#114914,#114915,#114916)),.UNSPECIFIED.,.F.,
 .F.,.F.)
B_SPLINE_SURFACE_WITH_KNOTS((4,4),(3,3),(-5.89805981832114E-17,0.0142595610833898),
(0.,1.),.UNSPECIFIED.)
GEOMETRIC_REPRESENTATION_ITEM()
RATIONAL_B_SPLINE_SURFACE(((1.,0.733870268857972,1.),(1.,0.733953171943022,
1.),(1.,0.734032405578643,1.),(1.,0.734107244895841,1.)))
REPRESENTATION_ITEM('')
SURFACE()
);
#632=(
BOUNDED_SURFACE()
B_SPLINE_SURFACE(3,2,((#114926,#114927,#114928),(#114929,#114930,#114931),
(#114932,#114933,#114934),(#114935,#114936,#114937),(#114938,#114939,#114940),
(#114941,#114942,#114943),(#114944,#114945,#114946),(#114947,#114948,#114949),
(#114950,#114951,#114952),(#114953,#114954,#114955)),.UNSPECIFIED.,.F.,
 .F.,.F.)
B_SPLINE_SURFACE_WITH_KNOTS((4,2,2,2,4),(3,3),(2.67887376368581,2.99443776011378,
3.31000175654175,3.62556575296971,3.94112974939768),(0.,1.),
 .UNSPECIFIED.)
GEOMETRIC_REPRESENTATION_ITEM()
RATIONAL_B_SPLINE_SURFACE(((1.,0.694658370458991,1.),(1.,0.693998600341011,
1.),(1.,0.693549705371944,1.),(1.,0.693115921555998,1.),(1.,0.693131851553411,
1.),(1.,0.693627699474438,1.),(1.,0.694107510405834,1.),(1.,0.695481189759094,
1.),(1.,0.696374187049707,1.),(1.,0.697429201358512,1.)))
REPRESENTATION_ITEM('')
SURFACE()
);
#633=(
BOUNDED_SURFACE()
B_SPLINE_SURFACE(3,2,((#114970,#114971,#114972),(#114973,#114974,#114975),
(#114976,#114977,#114978),(#114979,#114980,#114981),(#114982,#114983,#114984),
(#114985,#114986,#114987)),.UNSPECIFIED.,.F.,.F.,.F.)
B_SPLINE_SURFACE_WITH_KNOTS((4,2,4),(3,3),(5.48335331197423,5.88341675927563,
6.28348020657704),(0.,1.00029489939746),.UNSPECIFIED.)
GEOMETRIC_REPRESENTATION_ITEM()
RATIONAL_B_SPLINE_SURFACE(((1.,0.697342934304512,1.00017850677262),(1.,
0.696003814995435,1.00017929658357),(1.,0.694927946657763,1.00017993112942),
(1.,0.693469747963844,1.00018079117326),(1.,0.693087831079405,1.00018101642737),
(1.,0.693090333872475,1.00018101495123)))
REPRESENTATION_ITEM('')
SURFACE()
);
#634=(
BOUNDED_SURFACE()
B_SPLINE_SURFACE(3,2,((#115003,#115004,#115005),(#115006,#115007,#115008),
(#115009,#115010,#115011),(#115012,#115013,#115014)),.UNSPECIFIED.,.F.,
 .F.,.F.)
B_SPLINE_SURFACE_WITH_KNOTS((4,4),(3,3),(5.482861048306,6.10851723741774),
(0.,1.),.UNSPECIFIED.)
GEOMETRIC_REPRESENTATION_ITEM()
RATIONAL_B_SPLINE_SURFACE(((1.,0.726622376373739,1.),(1.,0.730769542955845,
1.),(1.,0.733568608656966,1.),(1.,0.73454926510534,1.)))
REPRESENTATION_ITEM('')
SURFACE()
);
#635=(
BOUNDED_SURFACE()
B_SPLINE_SURFACE(3,2,((#115022,#115023,#115024),(#115025,#115026,#115027),
(#115028,#115029,#115030),(#115031,#115032,#115033)),.UNSPECIFIED.,.F.,
 .F.,.F.)
B_SPLINE_SURFACE_WITH_KNOTS((4,4),(3,3),(6.10851723741774,6.28318530717958),
(0.,1.),.UNSPECIFIED.)
GEOMETRIC_REPRESENTATION_ITEM()
RATIONAL_B_SPLINE_SURFACE(((1.,0.734549265105342,1.),(1.,0.734826018905293,
1.),(1.,0.734965302968929,1.),(1.,0.734965235770397,1.)))
REPRESENTATION_ITEM('')
SURFACE()
);
#636=(
BOUNDED_SURFACE()
B_SPLINE_SURFACE(3,2,((#115047,#115048,#115049),(#115050,#115051,#115052),
(#115053,#115054,#115055),(#115056,#115057,#115058)),.UNSPECIFIED.,.F.,
 .F.,.F.)
B_SPLINE_SURFACE_WITH_KNOTS((4,4),(3,3),(0.,0.00403489138707173),(0.,1.),
 .UNSPECIFIED.)
GEOMETRIC_REPRESENTATION_ITEM()
RATIONAL_B_SPLINE_SURFACE(((1.,0.890729059349979,1.),(1.,0.892929970125375,
1.),(1.,0.892737895581491,1.),(1.,0.890168628311665,1.)))
REPRESENTATION_ITEM('')
SURFACE()
);
#637=(
BOUNDED_SURFACE()
B_SPLINE_SURFACE(3,2,((#115085,#115086,#115087),(#115088,#115089,#115090),
(#115091,#115092,#115093),(#115094,#115095,#115096)),.UNSPECIFIED.,.F.,
 .F.,.F.)
B_SPLINE_SURFACE_WITH_KNOTS((4,4),(3,3),(-4.5102810375397E-17,0.0292885711597344),
(0.,1.),.UNSPECIFIED.)
GEOMETRIC_REPRESENTATION_ITEM()
RATIONAL_B_SPLINE_SURFACE(((1.,0.889854963301628,1.),(1.,0.889922782975962,
1.),(1.,0.889983128032778,1.),(1.,0.890036831842682,1.)))
REPRESENTATION_ITEM('')
SURFACE()
);
#638=(
BOUNDED_SURFACE()
B_SPLINE_SURFACE(3,2,((#115114,#115115,#115116),(#115117,#115118,#115119),
(#115120,#115121,#115122),(#115123,#115124,#115125)),.UNSPECIFIED.,.F.,
 .F.,.F.)
B_SPLINE_SURFACE_WITH_KNOTS((4,4),(3,3),(0.0918733685313823,0.0952495810713483),
(-8.72438593431313E-7,1.00000087243859),.UNSPECIFIED.)
GEOMETRIC_REPRESENTATION_ITEM()
RATIONAL_B_SPLINE_SURFACE(((1.00000001798427,0.98969309286009,1.00000001798427),
(1.00000001805102,0.989654838255596,1.00000001805102),(1.00000001812737,
0.989611079521043,1.00000001812737),(1.00000001821309,0.989561956653784,
1.00000001821309)))
REPRESENTATION_ITEM('')
SURFACE()
);
#639=(
BOUNDED_SURFACE()
B_SPLINE_SURFACE(3,2,((#115128,#115129,#115130),(#115131,#115132,#115133),
(#115134,#115135,#115136),(#115137,#115138,#115139),(#115140,#115141,#115142),
(#115143,#115144,#115145),(#115146,#115147,#115148),(#115149,#115150,#115151),
(#115152,#115153,#115154),(#115155,#115156,#115157),(#115158,#115159,#115160),
(#115161,#115162,#115163),(#115164,#115165,#115166),(#115167,#115168,#115169)),
 .UNSPECIFIED.,.F.,.F.,.F.)
B_SPLINE_SURFACE_WITH_KNOTS((4,2,2,2,2,2,4),(3,3),(-0.000182420494699893,
0.00081164239447551,0.00162328478895128,0.00243492718342705,0.00324656957790282,
0.00486985436685435,0.00667555965048503),(0.,1.00018676845168),
 .UNSPECIFIED.)
GEOMETRIC_REPRESENTATION_ITEM()
RATIONAL_B_SPLINE_SURFACE(((1.,0.975874970347527,1.00000901158887),(1.,
0.976508399996199,1.00000877497952),(1.,0.976443559263946,1.00000879919992),
(1.,0.975152688185942,1.00000928138791),(1.,0.974128080936659,1.00000966411653),
(1.,0.971417296543194,1.00001067669454),(1.,0.969708794729008,1.00001131488301),
(1.,0.965819748403555,1.00001276758533),(1.,0.963651813849042,1.0000135773889),
(1.,0.956625512428613,1.00001620197178),(1.,0.951211380320866,1.00001822434992),
(1.,0.93909815932017,1.00002274908498),(1.,0.932269660448803,1.0000252997813),
(1.,0.925100731384492,1.00002797764086)))
REPRESENTATION_ITEM('')
SURFACE()
);
#640=(
BOUNDED_SURFACE()
B_SPLINE_SURFACE(3,2,((#115266,#115267,#115268),(#115269,#115270,#115271),
(#115272,#115273,#115274),(#115275,#115276,#115277),(#115278,#115279,#115280),
(#115281,#115282,#115283),(#115284,#115285,#115286),(#115287,#115288,#115289),
(#115290,#115291,#115292),(#115293,#115294,#115295),(#115296,#115297,#115298),
(#115299,#115300,#115301)),.UNSPECIFIED.,.F.,.F.,.F.)
B_SPLINE_SURFACE_WITH_KNOTS((4,2,2,2,2,4),(3,3),(-1.04331394754407E-5,0.00249952123915741,
0.00374928185873614,0.00499904247831486,0.00749856371747232,0.0100085180961052),
(-1.94652008060556E-5,1.),.UNSPECIFIED.)
GEOMETRIC_REPRESENTATION_ITEM()
RATIONAL_B_SPLINE_SURFACE(((1.00000301269132,0.922613402464187,0.999999999999999),
(1.00000308258978,0.920817930354328,1.),(1.00000318852263,0.918096847153952,
1.),(1.00000339456414,0.912804286571543,1.),(1.00000347093525,0.910842552387414,
1.),(1.0000036390322,0.906524668452765,1.),(1.00000373076966,0.904168220463552,
1.),(1.00000402211603,0.89668444556567,1.),(1.00000423951183,0.891100228889141,
1.),(1.00000471754122,0.878821152185784,1.),(1.00000497998369,0.872079827682817,
1.),(1.00000525522681,0.865009694596455,1.)))
REPRESENTATION_ITEM('')
SURFACE()
);
#641=(
BOUNDED_SURFACE()
B_SPLINE_SURFACE(3,2,((#115316,#115317,#115318),(#115319,#115320,#115321),
(#115322,#115323,#115324),(#115325,#115326,#115327),(#115328,#115329,#115330),
(#115331,#115332,#115333),(#115334,#115335,#115336),(#115337,#115338,#115339),
(#115340,#115341,#115342),(#115343,#115344,#115345),(#115346,#115347,#115348),
(#115349,#115350,#115351)),.UNSPECIFIED.,.F.,.F.,.F.)
B_SPLINE_SURFACE_WITH_KNOTS((4,2,2,2,2,4),(3,3),(-6.10983628883443E-5,0.00182852863296691,
0.00365705726593492,0.00731411453187095,0.010971171797807,0.01468932742663),
(0.,1.00008499909505),.UNSPECIFIED.)
GEOMETRIC_REPRESENTATION_ITEM()
RATIONAL_B_SPLINE_SURFACE(((1.,0.928334171835616,1.00001218306108),(1.,
0.917377158027939,1.0000140457336),(1.,0.906091619061942,1.00001596425479),
(1.,0.883556125326937,1.00001979524795),(1.,0.872314643760917,1.00002170627947),
(1.,0.838321663328444,1.00002748502461),(1.,0.815222092564169,1.00003141190984),
(1.,0.769455163895886,1.00003919220488),(1.,0.746719177236824,1.00004305728146),
(1.,0.701301343682268,1.00005077823096),(1.,0.678625438437161,1.00005463309382),
(1.,0.65622179215926,1.00005844167313)))
REPRESENTATION_ITEM('')
SURFACE()
);
#642=(
BOUNDED_SURFACE()
B_SPLINE_SURFACE(3,2,((#115413,#115414,#115415),(#115416,#115417,#115418),
(#115419,#115420,#115421),(#115422,#115423,#115424)),.UNSPECIFIED.,.F.,
 .F.,.F.)
B_SPLINE_SURFACE_WITH_KNOTS((4,4),(3,3),(0.,0.00125314706695302),(0.,1.),
 .UNSPECIFIED.)
GEOMETRIC_REPRESENTATION_ITEM()
RATIONAL_B_SPLINE_SURFACE(((1.,0.657355576552703,1.),(1.,0.657806489396518,
1.),(1.,0.658253757373427,1.),(1.,0.658697491371784,1.)))
REPRESENTATION_ITEM('')
SURFACE()
);
#643=(
BOUNDED_SURFACE()
B_SPLINE_SURFACE(3,2,((#115430,#115431,#115432),(#115433,#115434,#115435),
(#115436,#115437,#115438),(#115439,#115440,#115441),(#115442,#115443,#115444),
(#115445,#115446,#115447),(#115448,#115449,#115450),(#115451,#115452,#115453),
(#115454,#115455,#115456),(#115457,#115458,#115459),(#115460,#115461,#115462),
(#115463,#115464,#115465)),.UNSPECIFIED.,.F.,.F.,.F.)
B_SPLINE_SURFACE_WITH_KNOTS((4,2,2,2,2,4),(3,3),(0.,0.00235065090194418,
0.00352597635291626,0.00470130180388835,0.00705195270583253,0.0094026036077767),
(0.,1.),.UNSPECIFIED.)
GEOMETRIC_REPRESENTATION_ITEM()
RATIONAL_B_SPLINE_SURFACE(((1.,0.878926677386228,1.),(1.,0.880633572500274,
1.),(1.,0.881600215173518,1.),(1.,0.881971310900512,1.),(1.,0.881914624557996,
1.),(1.,0.881433305801621,1.),(1.,0.881005741529713,1.),(1.,0.87920286248462,
1.),(1.,0.877309091715707,1.),(1.,0.872181307917061,1.),(1.,0.868925864305414,
1.),(1.,0.86510046874951,1.)))
REPRESENTATION_ITEM('')
SURFACE()
);
#644=(
BOUNDED_SURFACE()
B_SPLINE_SURFACE(3,2,((#115502,#115503,#115504),(#115505,#115506,#115507),
(#115508,#115509,#115510),(#115511,#115512,#115513)),.UNSPECIFIED.,.F.,
 .F.,.F.)
B_SPLINE_SURFACE_WITH_KNOTS((4,4),(3,3),(-1.07552855510562E-16,0.0267162858996683),
(0.,1.),.UNSPECIFIED.)
GEOMETRIC_REPRESENTATION_ITEM()
RATIONAL_B_SPLINE_SURFACE(((1.,0.996754904276314,1.),(1.,0.99691815785327,
1.),(1.,0.997105121080905,1.),(1.,0.997294383361589,1.)))
REPRESENTATION_ITEM('')
SURFACE()
);
#645=(
BOUNDED_SURFACE()
B_SPLINE_SURFACE(3,2,((#115528,#115529,#115530),(#115531,#115532,#115533),
(#115534,#115535,#115536),(#115537,#115538,#115539),(#115540,#115541,#115542),
(#115543,#115544,#115545),(#115546,#115547,#115548),(#115549,#115550,#115551),
(#115552,#115553,#115554),(#115555,#115556,#115557),(#115558,#115559,#115560),
(#115561,#115562,#115563),(#115564,#115565,#115566),(#115567,#115568,#115569)),
 .UNSPECIFIED.,.F.,.F.,.F.)
B_SPLINE_SURFACE_WITH_KNOTS((4,2,2,2,2,2,4),(3,3),(-0.000165946588728103,
0.00110845233042955,0.0022169046608751,0.00277113082609787,0.00332535699132064,
0.00387958315654342,0.00459975591047799),(0.,1.00110155371769),
 .UNSPECIFIED.)
GEOMETRIC_REPRESENTATION_ITEM()
RATIONAL_B_SPLINE_SURFACE(((1.,0.976869728834492,1.00005095847238),(1.,
0.979069992100293,1.00004611105602),(1.,0.981249127794438,1.00004131018598),
(1.,0.985244880371826,1.00003250711376),(1.,0.98707346732164,1.00002847854025),
(1.,0.989725112273828,1.00002263668155),(1.,0.990589387839026,1.00002073258962),
(1.,0.992248447140118,1.00001707750375),(1.,0.993050543446468,1.00001531039941),
(1.,0.994508810363275,1.00001209768071),(1.,0.995168317062758,1.0000106447166),
(1.,0.996394935439191,1.00000794234454),(1.,0.996850845287414,1.00000693792616),
(1.,0.996785967855346,1.00000708085813)))
REPRESENTATION_ITEM('')
SURFACE()
);
#646=(
BOUNDED_SURFACE()
B_SPLINE_SURFACE(3,2,((#115677,#115678,#115679),(#115680,#115681,#115682),
(#115683,#115684,#115685),(#115686,#115687,#115688),(#115689,#115690,#115691),
(#115692,#115693,#115694),(#115695,#115696,#115697),(#115698,#115699,#115700),
(#115701,#115702,#115703),(#115704,#115705,#115706),(#115707,#115708,#115709),
(#115710,#115711,#115712)),.UNSPECIFIED.,.F.,.F.,.F.)
B_SPLINE_SURFACE_WITH_KNOTS((4,2,2,2,2,4),(3,3),(-0.000113997093016889,
0.0036732156018174,0.00734643120364191,0.0110196468054664,0.0128562546063787,
0.0148068595002932),(0.,1.00012381305268),.UNSPECIFIED.)
GEOMETRIC_REPRESENTATION_ITEM()
RATIONAL_B_SPLINE_SURFACE(((0.999999999999999,0.876958870718303,1.00003046819565),
(1.,0.884648571608199,1.00002856402496),(1.,0.892591984248071,1.00002659702862),
(1.,0.908716560646796,1.00002260416257),(1.,0.91688384248478,1.00002058173037),
(1.,0.933641236873525,1.00001643216207),(1.,0.94223277425623,1.00001430467313),
(1.,0.955387277605443,1.00001104727469),(1.,0.959816439724556,1.00000995049853),
(1.,0.969020069908301,1.00000767143943),(1.,0.973799515663189,1.0000064879239),
(1.,0.978589595225709,1.00000530177515)))
REPRESENTATION_ITEM('')
SURFACE()
);
#647=(
BOUNDED_SURFACE()
B_SPLINE_SURFACE(3,2,((#115768,#115769,#115770),(#115771,#115772,#115773),
(#115774,#115775,#115776),(#115777,#115778,#115779)),.UNSPECIFIED.,.F.,
 .F.,.F.)
B_SPLINE_SURFACE_WITH_KNOTS((4,4),(3,3),(0.0393483234013829,0.0610219850016297),
(0.,1.),.UNSPECIFIED.)
GEOMETRIC_REPRESENTATION_ITEM()
RATIONAL_B_SPLINE_SURFACE(((1.,0.905262410070295,1.),(1.,0.908795397039036,
1.),(1.,0.912689368496647,1.),(1.,0.917052864030177,1.)))
REPRESENTATION_ITEM('')
SURFACE()
);
#648=(
BOUNDED_SURFACE()
B_SPLINE_SURFACE(3,2,((#115786,#115787,#115788),(#115789,#115790,#115791),
(#115792,#115793,#115794),(#115795,#115796,#115797)),.UNSPECIFIED.,.F.,
 .F.,.F.)
B_SPLINE_SURFACE_WITH_KNOTS((4,4),(3,3),(0.,0.00758323617980971),(0.,1.),
 .UNSPECIFIED.)
GEOMETRIC_REPRESENTATION_ITEM()
RATIONAL_B_SPLINE_SURFACE(((1.,0.811835924523642,1.),(1.,0.814044973262778,
1.),(1.,0.816215843750299,1.),(1.,0.818352309267362,1.)))
REPRESENTATION_ITEM('')
SURFACE()
);
#649=(
BOUNDED_SURFACE()
B_SPLINE_SURFACE(3,2,((#115896,#115897,#115898),(#115899,#115900,#115901),
(#115902,#115903,#115904),(#115905,#115906,#115907)),.UNSPECIFIED.,.F.,
 .F.,.F.)
B_SPLINE_SURFACE_WITH_KNOTS((4,4),(3,3),(0.,7.18262239638743E-5),(0.,1.),
 .UNSPECIFIED.)
GEOMETRIC_REPRESENTATION_ITEM()
RATIONAL_B_SPLINE_SURFACE(((1.,0.728225219383198,1.),(1.,0.726275191780839,
1.),(1.,0.724316874979356,1.),(1.,0.722350066311196,1.)))
REPRESENTATION_ITEM('')
SURFACE()
);
#650=(
BOUNDED_SURFACE()
B_SPLINE_SURFACE(3,2,((#115918,#115919,#115920),(#115921,#115922,#115923),
(#115924,#115925,#115926),(#115927,#115928,#115929)),.UNSPECIFIED.,.F.,
 .F.,.F.)
B_SPLINE_SURFACE_WITH_KNOTS((4,4),(3,3),(0.,0.00605799761929958),(0.,1.),
 .UNSPECIFIED.)
GEOMETRIC_REPRESENTATION_ITEM()
RATIONAL_B_SPLINE_SURFACE(((1.,0.912647878274364,1.),(1.,0.914084485860508,
1.),(1.,0.915454999630058,1.),(1.,0.916720713557935,1.)))
REPRESENTATION_ITEM('')
SURFACE()
);
#651=(
BOUNDED_SURFACE()
B_SPLINE_SURFACE(3,2,((#115938,#115939,#115940),(#115941,#115942,#115943),
(#115944,#115945,#115946),(#115947,#115948,#115949)),.UNSPECIFIED.,.F.,
 .F.,.F.)
B_SPLINE_SURFACE_WITH_KNOTS((4,4),(3,3),(4.08374095581965,4.36299363613899),
(0.,1.),.UNSPECIFIED.)
GEOMETRIC_REPRESENTATION_ITEM()
RATIONAL_B_SPLINE_SURFACE(((1.,0.727993861800628,1.),(1.,0.725358409252166,
1.),(1.,0.722438933497413,1.),(1.,0.719339800338651,1.)))
REPRESENTATION_ITEM('')
SURFACE()
);
#652=(
BOUNDED_SURFACE()
B_SPLINE_SURFACE(3,2,((#116026,#116027,#116028),(#116029,#116030,#116031),
(#116032,#116033,#116034),(#116035,#116036,#116037)),.UNSPECIFIED.,.F.,
 .F.,.F.)
B_SPLINE_SURFACE_WITH_KNOTS((4,4),(3,3),(4.33680868994202E-19,0.00126990317435772),
(0.,1.),.UNSPECIFIED.)
GEOMETRIC_REPRESENTATION_ITEM()
RATIONAL_B_SPLINE_SURFACE(((1.,0.946914839885651,1.),(1.,0.947185375384126,
1.),(1.,0.94744899710587,1.),(1.,0.947706007032018,1.)))
REPRESENTATION_ITEM('')
SURFACE()
);
#653=(
BOUNDED_SURFACE()
B_SPLINE_SURFACE(3,2,((#116043,#116044,#116045),(#116046,#116047,#116048),
(#116049,#116050,#116051),(#116052,#116053,#116054),(#116055,#116056,#116057),
(#116058,#116059,#116060)),.UNSPECIFIED.,.F.,.F.,.F.)
B_SPLINE_SURFACE_WITH_KNOTS((4,2,4),(3,3),(-2.24026526496335E-14,0.00397039644342791,
0.00794079288687823),(0.,1.),.UNSPECIFIED.)
GEOMETRIC_REPRESENTATION_ITEM()
RATIONAL_B_SPLINE_SURFACE(((1.,0.947706007031944,1.),(1.,0.943290905726492,
1.),(1.,0.937899255743554,1.),(1.,0.925617229078687,1.),(1.,0.918682504022707,
1.),(1.,0.911288565719537,1.)))
REPRESENTATION_ITEM('')
SURFACE()
);
#654=(
BOUNDED_SURFACE()
B_SPLINE_SURFACE(3,2,((#116085,#116086,#116087),(#116088,#116089,#116090),
(#116091,#116092,#116093),(#116094,#116095,#116096)),.UNSPECIFIED.,.F.,
 .F.,.F.)
B_SPLINE_SURFACE_WITH_KNOTS((4,4),(3,3),(-3.03368441478824E-14,0.0159404471931817),
(0.,1.),.UNSPECIFIED.)
GEOMETRIC_REPRESENTATION_ITEM()
RATIONAL_B_SPLINE_SURFACE(((1.,0.911288565719558,1.),(1.,0.915143187555718,
1.),(1.,0.918922299745003,1.),(1.,0.922592471504009,1.)))
REPRESENTATION_ITEM('')
SURFACE()
);
#655=(
BOUNDED_SURFACE()
B_SPLINE_SURFACE(3,2,((#116103,#116104,#116105),(#116106,#116107,#116108),
(#116109,#116110,#116111),(#116112,#116113,#116114)),.UNSPECIFIED.,.F.,
 .F.,.F.)
B_SPLINE_SURFACE_WITH_KNOTS((4,4),(3,3),(0.,0.0161950908918461),(0.,1.),
 .UNSPECIFIED.)
GEOMETRIC_REPRESENTATION_ITEM()
RATIONAL_B_SPLINE_SURFACE(((1.,0.976157924905098,1.),(1.,0.976367599349397,
1.),(1.,0.976614896609145,1.),(1.,0.976883313735806,1.)))
REPRESENTATION_ITEM('')
SURFACE()
);
#656=(
BOUNDED_SURFACE()
B_SPLINE_SURFACE(3,2,((#116129,#116130,#116131),(#116132,#116133,#116134),
(#116135,#116136,#116137),(#116138,#116139,#116140),(#116141,#116142,#116143),
(#116144,#116145,#116146),(#116147,#116148,#116149),(#116150,#116151,#116152),
(#116153,#116154,#116155),(#116156,#116157,#116158)),.UNSPECIFIED.,.F.,
 .F.,.F.)
B_SPLINE_SURFACE_WITH_KNOTS((4,2,2,2,4),(3,3),(1.16559650901717,1.54520562132594,
1.92481473363471,2.30442384594348,2.68403295825224),(0.,1.),
 .UNSPECIFIED.)
GEOMETRIC_REPRESENTATION_ITEM()
RATIONAL_B_SPLINE_SURFACE(((1.,0.716301943424656,1.),(1.,0.713607614150078,
1.),(1.,0.710674555327822,1.),(1.,0.704739985554641,1.),(1.,0.701739588150069,
1.),(1.,0.696101208315963,1.),(1.,0.693465451199519,1.),(1.,0.688950852263354,
1.),(1.,0.687071980767171,1.),(1.,0.685720793081262,1.)))
REPRESENTATION_ITEM('')
SURFACE()
);
#657=(
BOUNDED_SURFACE()
B_SPLINE_SURFACE(3,2,((#116177,#116178,#116179),(#116180,#116181,#116182),
(#116183,#116184,#116185),(#116186,#116187,#116188),(#116189,#116190,#116191),
(#116192,#116193,#116194),(#116195,#116196,#116197),(#116198,#116199,#116200),
(#116201,#116202,#116203),(#116204,#116205,#116206)),.UNSPECIFIED.,.F.,
 .F.,.F.)
B_SPLINE_SURFACE_WITH_KNOTS((4,2,2,2,4),(3,3),(-1.06801350239545E-5,0.000954078425391295,
0.00190815685078259,0.00286223527617389,0.00382699486309603),(0.,1.00001068116153),
 .UNSPECIFIED.)
GEOMETRIC_REPRESENTATION_ITEM()
RATIONAL_B_SPLINE_SURFACE(((1.,0.608057951152786,1.00000837279267),(1.,
0.616307729987918,1.00000819655823),(1.,0.625088223966446,1.00000800898648),
(1.,0.6432510180943,1.000007620987),(1.,0.65271599201051,1.00000741879317),
(1.,0.671340896300797,1.00000702092195),(1.,0.680585428571004,1.00000682343727),
(1.,0.699023336472089,1.00000642956072),(1.,0.707962976023608,1.00000623858925),
(1.,0.716585415193963,1.00000605439392)))
REPRESENTATION_ITEM('')
SURFACE()
);
#658=(
BOUNDED_SURFACE()
B_SPLINE_SURFACE(3,2,((#116228,#116229,#116230),(#116231,#116232,#116233),
(#116234,#116235,#116236),(#116237,#116238,#116239)),.UNSPECIFIED.,.F.,
 .F.,.F.)
B_SPLINE_SURFACE_WITH_KNOTS((4,4),(3,3),(0.,0.00153857998417576),(0.,1.),
 .UNSPECIFIED.)
GEOMETRIC_REPRESENTATION_ITEM()
RATIONAL_B_SPLINE_SURFACE(((1.,0.608336311218929,1.),(1.,0.601387010374271,
1.),(1.,0.595157345581303,1.),(1.,0.589755109947518,1.)))
REPRESENTATION_ITEM('')
SURFACE()
);
#659=(
BOUNDED_SURFACE()
B_SPLINE_SURFACE(3,2,((#116243,#116244,#116245),(#116246,#116247,#116248),
(#116249,#116250,#116251),(#116252,#116253,#116254),(#116255,#116256,#116257),
(#116258,#116259,#116260),(#116261,#116262,#116263),(#116264,#116265,#116266),
(#116267,#116268,#116269),(#116270,#116271,#116272),(#116273,#116274,#116275),
(#116276,#116277,#116278),(#116279,#116280,#116281),(#116282,#116283,#116284)),
 .UNSPECIFIED.,.F.,.F.,.F.)
B_SPLINE_SURFACE_WITH_KNOTS((4,2,2,2,2,2,4),(3,3),(-0.000182420517701793,
0.000811642394475343,0.00162328478895094,0.00243492718342655,0.00324656957790215,
0.00486985436685335,0.00667555967348539),(-0.000186768493253606,1.),
 .UNSPECIFIED.)
GEOMETRIC_REPRESENTATION_ITEM()
RATIONAL_B_SPLINE_SURFACE(((1.00000901159089,0.975874970303096,1.),(1.00000877498147,
0.976508399997261,1.),(1.00000879920188,0.976443559280109,1.),(1.00000928138998,
0.975152688184334,1.),(1.00000966411868,0.97412808093572,1.),(1.00001067669692,
0.971417296541871,1.),(1.00001131488553,0.969708794728175,1.),(1.00001276758818,
0.965819748401713,1.),(1.00001357739192,0.963651813847013,1.),(1.00001620197538,
0.956625512427823,1.),(1.00001822435397,0.951211380317844,1.),(1.00002274909008,
0.939098159237488,1.),(1.00002529978699,0.932269660270842,1.),(1.0000279776472,
0.925100731107773,1.)))
REPRESENTATION_ITEM('')
SURFACE()
);
#660=(
BOUNDED_SURFACE()
B_SPLINE_SURFACE(3,2,((#116375,#116376,#116377),(#116378,#116379,#116380),
(#116381,#116382,#116383),(#116384,#116385,#116386)),.UNSPECIFIED.,.F.,
 .F.,.F.)
B_SPLINE_SURFACE_WITH_KNOTS((4,4),(3,3),(0.,0.00125314706695302),(0.,1.),
 .UNSPECIFIED.)
GEOMETRIC_REPRESENTATION_ITEM()
RATIONAL_B_SPLINE_SURFACE(((1.,0.657355576552703,1.),(1.,0.657806489396516,
1.),(1.,0.65825375737343,1.),(1.,0.658697491371784,1.)))
REPRESENTATION_ITEM('')
SURFACE()
);
#661=(
BOUNDED_SURFACE()
B_SPLINE_SURFACE(3,2,((#116395,#116396,#116397),(#116398,#116399,#116400),
(#116401,#116402,#116403),(#116404,#116405,#116406),(#116407,#116408,#116409),
(#116410,#116411,#116412),(#116413,#116414,#116415),(#116416,#116417,#116418),
(#116419,#116420,#116421),(#116422,#116423,#116424),(#116425,#116426,#116427),
(#116428,#116429,#116430)),.UNSPECIFIED.,.F.,.F.,.F.)
B_SPLINE_SURFACE_WITH_KNOTS((4,2,2,2,2,4),(3,3),(-6.10984041725344E-5,0.00182852863296691,
0.00365705726593493,0.00731411453187096,0.010971171797807,0.0146893274679139),
(-8.49990848118801E-5,1.),.UNSPECIFIED.)
GEOMETRIC_REPRESENTATION_ITEM()
RATIONAL_B_SPLINE_SURFACE(((1.00001218305949,0.928334172554573,1.),(1.00001404573182,
0.91737715852127,1.),(1.00001596425283,0.906091619313865,1.),(1.00001979524555,
0.883556125327423,1.),(1.00002170627685,0.872314643766067,1.),(1.00002748502131,
0.838321663322054,1.),(1.00003141190605,0.81522209256118,1.),(1.00003919220015,
0.769455163903141,1.),(1.00004305727627,0.746719177240501,1.),(1.00005077822489,
0.701301343429992,1.),(1.00005463308732,0.678625437937777,1.),(1.00005844166621,
0.656221791416473,0.999999999999999)))
REPRESENTATION_ITEM('')
SURFACE()
);
#662=(
BOUNDED_SURFACE()
B_SPLINE_SURFACE(3,2,((#116489,#116490,#116491),(#116492,#116493,#116494),
(#116495,#116496,#116497),(#116498,#116499,#116500),(#116501,#116502,#116503),
(#116504,#116505,#116506),(#116507,#116508,#116509),(#116510,#116511,#116512),
(#116513,#116514,#116515),(#116516,#116517,#116518),(#116519,#116520,#116521),
(#116522,#116523,#116524)),.UNSPECIFIED.,.F.,.F.,.F.)
B_SPLINE_SURFACE_WITH_KNOTS((4,2,2,2,2,4),(3,3),(-1.04331394808629E-5,0.00249952123915741,
0.00374928185873614,0.00499904247831486,0.00749856371747232,0.0100085180961106),
(0.,1.00001946520082),.UNSPECIFIED.)
GEOMETRIC_REPRESENTATION_ITEM()
RATIONAL_B_SPLINE_SURFACE(((1.,0.922613402464198,1.00000301269133),(1.,
0.920817930354339,1.00000308258978),(1.,0.918096847153959,1.00000318852263),
(1.,0.912804286571541,1.00000339456414),(1.,0.910842552387412,1.00000347093525),
(1.,0.906524668452763,1.0000036390322),(1.,0.904168220463551,1.00000373076967),
(1.,0.896684445565668,1.00000402211603),(1.,0.891100228889139,1.00000423951183),
(1.,0.878821152185769,1.00000471754122),(1.,0.872079827682786,1.00000497998369),
(1.,0.865009694596406,1.00000525522681)))
REPRESENTATION_ITEM('')
SURFACE()
);
#663=(
BOUNDED_SURFACE()
B_SPLINE_SURFACE(3,2,((#116545,#116546,#116547),(#116548,#116549,#116550),
(#116551,#116552,#116553),(#116554,#116555,#116556),(#116557,#116558,#116559),
(#116560,#116561,#116562),(#116563,#116564,#116565),(#116566,#116567,#116568),
(#116569,#116570,#116571),(#116572,#116573,#116574),(#116575,#116576,#116577),
(#116578,#116579,#116580)),.UNSPECIFIED.,.F.,.F.,.F.)
B_SPLINE_SURFACE_WITH_KNOTS((4,2,2,2,2,4),(3,3),(0.,0.00235065090194418,
0.00352597635291626,0.00470130180388835,0.00705195270583253,0.0094026036077767),
(0.,1.),.UNSPECIFIED.)
GEOMETRIC_REPRESENTATION_ITEM()
RATIONAL_B_SPLINE_SURFACE(((1.,0.878926677386228,1.),(1.,0.880633572500274,
1.),(1.,0.881600215173518,1.),(1.,0.881971310900512,1.),(1.,0.881914624557996,
1.),(1.,0.881433305801621,1.),(1.,0.881005741529713,1.),(1.,0.87920286248462,
1.),(1.,0.877309091715707,1.),(1.,0.872181307917061,1.),(1.,0.868925864305414,
1.),(1.,0.86510046874951,1.)))
REPRESENTATION_ITEM('')
SURFACE()
);
#664=(
BOUNDED_SURFACE()
B_SPLINE_SURFACE(3,2,((#116617,#116618,#116619),(#116620,#116621,#116622),
(#116623,#116624,#116625),(#116626,#116627,#116628),(#116629,#116630,#116631),
(#116632,#116633,#116634),(#116635,#116636,#116637),(#116638,#116639,#116640),
(#116641,#116642,#116643),(#116644,#116645,#116646),(#116647,#116648,#116649),
(#116650,#116651,#116652)),.UNSPECIFIED.,.F.,.F.,.F.)
B_SPLINE_SURFACE_WITH_KNOTS((4,2,2,2,2,4),(3,3),(-0.000113997093422466,
0.0036732156018174,0.00734643120364191,0.0110196468054664,0.0128562546063787,
0.0148068595006989),(-0.0001238130443789,1.),.UNSPECIFIED.)
GEOMETRIC_REPRESENTATION_ITEM()
RATIONAL_B_SPLINE_SURFACE(((1.0000304681936,0.876958870717064,1.),(1.00002856402304,
0.884648571605102,1.),(1.00002659702684,0.892591984250898,1.),(1.00002260416106,
0.908716560644835,1.),(1.000020581729,0.916883842486016,1.),(1.00001643216097,
0.933641236873535,1.),(1.00001430467217,0.942232774256577,1.),(1.00001104727396,
0.955387277605884,1.),(1.00000995049786,0.959816439722813,1.),(1.00000767143891,
0.969020069911761,1.),(1.00000648792346,0.973799515663377,1.),(1.0000053017748,
0.978589595229225,0.999999999999999)))
REPRESENTATION_ITEM('')
SURFACE()
);
#665=(
BOUNDED_SURFACE()
B_SPLINE_SURFACE(3,2,((#116711,#116712,#116713),(#116714,#116715,#116716),
(#116717,#116718,#116719),(#116720,#116721,#116722),(#116723,#116724,#116725),
(#116726,#116727,#116728),(#116729,#116730,#116731),(#116732,#116733,#116734),
(#116735,#116736,#116737),(#116738,#116739,#116740),(#116741,#116742,#116743),
(#116744,#116745,#116746),(#116747,#116748,#116749),(#116750,#116751,#116752)),
 .UNSPECIFIED.,.F.,.F.,.F.)
B_SPLINE_SURFACE_WITH_KNOTS((4,2,2,2,2,2,4),(3,3),(-0.000165946604265795,
0.00110845233042956,0.00221690466087511,0.00277113082609788,0.00332535699132066,
0.00387958315654343,0.00459975592601602),(-0.00110155396701784,1.),
 .UNSPECIFIED.)
GEOMETRIC_REPRESENTATION_ITEM()
RATIONAL_B_SPLINE_SURFACE(((1.00005095848412,0.976869728747893,1.),(1.00004611106659,
0.979069992042858,1.),(1.00004131019539,0.981249127762934,1.),(1.00003250712113,
0.985244880368828,1.),(1.00002847854671,0.987073467318197,1.),(1.00002263668668,
0.989725112271385,1.),(1.00002073259432,0.990589387836555,1.),(1.00001707750761,
0.992248447138308,1.),(1.00001531040288,0.993050543444707,1.),(1.00001209768345,
0.994508810361939,1.),(1.00001064471901,0.995168317061585,1.),(1.0000079423463,
0.996394935453207,1.),(1.00000693792769,0.996850845306377,1.),(1.00000708085974,
0.996785967850292,1.)))
REPRESENTATION_ITEM('')
SURFACE()
);
#666=(
BOUNDED_SURFACE()
B_SPLINE_SURFACE(3,2,((#116860,#116861,#116862),(#116863,#116864,#116865),
(#116866,#116867,#116868),(#116869,#116870,#116871)),.UNSPECIFIED.,.F.,
 .F.,.F.)
B_SPLINE_SURFACE_WITH_KNOTS((4,4),(3,3),(-1.07552855510562E-16,0.0267162858996683),
(0.,1.),.UNSPECIFIED.)
GEOMETRIC_REPRESENTATION_ITEM()
RATIONAL_B_SPLINE_SURFACE(((1.,0.996754904276314,1.),(1.,0.99691815785327,
1.),(1.,0.997105121080905,1.),(1.,0.997294383361589,1.)))
REPRESENTATION_ITEM('')
SURFACE()
);
#667=(
BOUNDED_SURFACE()
B_SPLINE_SURFACE(3,2,((#116919,#116920,#116921),(#116922,#116923,#116924),
(#116925,#116926,#116927),(#116928,#116929,#116930)),.UNSPECIFIED.,.F.,
 .F.,.F.)
B_SPLINE_SURFACE_WITH_KNOTS((4,4),(3,3),(5.45668110952609,5.99960283367363),
(0.,1.),.UNSPECIFIED.)
GEOMETRIC_REPRESENTATION_ITEM()
RATIONAL_B_SPLINE_SURFACE(((1.,0.726096315248088,1.),(1.,0.729784556012956,
1.),(1.,0.732492647174433,1.),(1.,0.733872823887339,1.)))
REPRESENTATION_ITEM('')
SURFACE()
);
#668=(
BOUNDED_SURFACE()
B_SPLINE_SURFACE(3,2,((#116934,#116935,#116936),(#116937,#116938,#116939),
(#116940,#116941,#116942),(#116943,#116944,#116945)),.UNSPECIFIED.,.F.,
 .F.,.F.)
B_SPLINE_SURFACE_WITH_KNOTS((4,4),(3,3),(5.45668110952609,5.99960283367363),
(0.,1.),.UNSPECIFIED.)
GEOMETRIC_REPRESENTATION_ITEM()
RATIONAL_B_SPLINE_SURFACE(((1.,0.726096315248088,1.),(1.,0.729784556012956,
1.),(1.,0.732492647174433,1.),(1.,0.733872823887339,1.)))
REPRESENTATION_ITEM('')
SURFACE()
);
#669=(
BOUNDED_SURFACE()
B_SPLINE_SURFACE(3,2,((#116969,#116970,#116971),(#116972,#116973,#116974),
(#116975,#116976,#116977),(#116978,#116979,#116980)),.UNSPECIFIED.,.F.,
 .F.,.F.)
B_SPLINE_SURFACE_WITH_KNOTS((4,4),(3,3),(0.086547508497542,0.0919702783781644),
(0.,0.64558001060497),.UNSPECIFIED.)
GEOMETRIC_REPRESENTATION_ITEM()
RATIONAL_B_SPLINE_SURFACE(((1.,0.924540939678747,0.946511601282365),(1.,
0.925148361214704,0.94694216595103),(1.,0.925749955382678,0.947368599948296),
(1.,0.926345753907735,0.947790925762161)))
REPRESENTATION_ITEM('')
SURFACE()
);
#670=(
BOUNDED_SURFACE()
B_SPLINE_SURFACE(3,2,((#117122,#117123,#117124),(#117125,#117126,#117127),
(#117128,#117129,#117130),(#117131,#117132,#117133),(#117134,#117135,#117136),
(#117137,#117138,#117139),(#117140,#117141,#117142),(#117143,#117144,#117145),
(#117146,#117147,#117148),(#117149,#117150,#117151),(#117152,#117153,#117154),
(#117155,#117156,#117157)),.UNSPECIFIED.,.F.,.F.,.F.)
B_SPLINE_SURFACE_WITH_KNOTS((4,2,2,2,2,4),(3,3),(-6.02859133250301E-5,0.000150715288159474,
0.000226072932239275,0.000301430576319076,0.000452145864478677,0.000663147267902158),
(-0.00100453694977956,1.),.UNSPECIFIED.)
GEOMETRIC_REPRESENTATION_ITEM()
RATIONAL_B_SPLINE_SURFACE(((1.00005968116539,0.970294191068128,1.),(1.00004424942706,
0.977975211829159,1.),(1.00002745004367,0.986336966663148,1.),(1.00002436644663,
0.987871801711077,1.),(1.00002548343001,0.987315832425508,1.),(1.00003079677625,
0.984671158061213,1.),(1.00003491433587,0.982621676644882,1.),(1.00004927402031,
0.975474261885448,1.),(1.00006158350031,0.969347319515365,1.),(1.0000927343737,
0.953842228643045,1.),(1.0001129524734,0.943778835895961,1.),(1.00013353927202,
0.933531926302702,1.)))
REPRESENTATION_ITEM('')
SURFACE()
);
#671=(
BOUNDED_SURFACE()
B_SPLINE_SURFACE(3,2,((#117271,#117272,#117273),(#117274,#117275,#117276),
(#117277,#117278,#117279),(#117280,#117281,#117282),(#117283,#117284,#117285),
(#117286,#117287,#117288),(#117289,#117290,#117291),(#117292,#117293,#117294),
(#117295,#117296,#117297),(#117298,#117299,#117300),(#117301,#117302,#117303),
(#117304,#117305,#117306),(#117307,#117308,#117309),(#117310,#117311,#117312),
(#117313,#117314,#117315),(#117316,#117317,#117318),(#117319,#117320,#117321),
(#117322,#117323,#117324),(#117325,#117326,#117327),(#117328,#117329,#117330)),
 .UNSPECIFIED.,.F.,.F.,.F.)
B_SPLINE_SURFACE_WITH_KNOTS((4,2,2,2,2,2,2,2,2,4),(3,3),(-0.000139647992705172,
0.000365159071385275,0.000547738793623092,0.000730318515860909,0.000821608376979818,
0.000912898238098727,0.00100418809921764,0.00109547796033654,0.00127805768257436,
0.0016002846518524),(0.,1.00120185779294),.UNSPECIFIED.)
GEOMETRIC_REPRESENTATION_ITEM()
RATIONAL_B_SPLINE_SURFACE(((1.,0.880272090542511,1.00028779184203),(1.,
0.901184187914604,1.00023752510764),(1.,0.921304018359595,1.00018916275761),
(1.,0.947352374812166,1.00012654991722),(1.,0.954167044177719,1.00011016939026),
(1.,0.967306096106301,1.00007858684635),(1.,0.973667692171704,1.00006329537874),
(1.,0.982439522839476,1.00004221039265),(1.,0.985180958650669,1.00003562076066),
(1.,0.98994145187011,1.00002417788891),(1.,0.992001217750245,1.00001922679756),
(1.,0.993615943400182,1.00001534545635),(1.,0.99296549466968,1.0000169089501),
(1.,0.989685037570088,1.00002479423596),(1.,0.987238971758114,1.00003067388248),
(1.,0.97927345568742,1.00004982071761),(1.,0.973036420946916,1.00006481277522),
(1.,0.955446546777232,1.00010709382992),(1.,0.943347963141551,1.00013617538397),
(1.,0.930933946765096,1.00016601514862)))
REPRESENTATION_ITEM('')
SURFACE()
);
#672=(
BOUNDED_SURFACE()
B_SPLINE_SURFACE(3,2,((#117337,#117338,#117339),(#117340,#117341,#117342),
(#117343,#117344,#117345),(#117346,#117347,#117348),(#117349,#117350,#117351),
(#117352,#117353,#117354),(#117355,#117356,#117357),(#117358,#117359,#117360),
(#117361,#117362,#117363),(#117364,#117365,#117366),(#117367,#117368,#117369),
(#117370,#117371,#117372),(#117373,#117374,#117375),(#117376,#117377,#117378)),
 .UNSPECIFIED.,.F.,.F.,.F.)
B_SPLINE_SURFACE_WITH_KNOTS((4,2,2,2,2,2,4),(3,3),(0.,0.000448181428457599,
0.000896362856915198,0.0013445442853728,0.0017927257138304,0.00268908857074559,
0.00358545142766079),(0.,1.),.UNSPECIFIED.)
GEOMETRIC_REPRESENTATION_ITEM()
RATIONAL_B_SPLINE_SURFACE(((1.,0.968622823622544,1.),(1.,0.970928927601575,
1.),(1.,0.971725568866546,1.),(1.,0.969403531216429,1.),(1.,0.966312591057871,
1.),(1.,0.956750702908267,1.),(1.,0.950336581784272,1.),(1.,0.934945602997519,
1.),(1.,0.925915752328107,1.),(1.,0.894857637924931,1.),(1.,0.86927172114247,
1.),(1.,0.807530610430465,1.),(1.,0.771295192731162,1.),(1.,0.728225219382402,
1.)))
REPRESENTATION_ITEM('')
SURFACE()
);
#673=(
BOUNDED_SURFACE()
B_SPLINE_SURFACE(3,2,((#117483,#117484,#117485),(#117486,#117487,#117488),
(#117489,#117490,#117491),(#117492,#117493,#117494)),.UNSPECIFIED.,.F.,
 .F.,.F.)
B_SPLINE_SURFACE_WITH_KNOTS((4,4),(3,3),(-1.86482773667507E-17,0.000975580687048644),
(0.,1.),.UNSPECIFIED.)
GEOMETRIC_REPRESENTATION_ITEM()
RATIONAL_B_SPLINE_SURFACE(((1.,0.94257877728744,1.),(1.,0.951846107080356,
1.),(1.,0.960652039850891,1.),(1.,0.968622823622538,1.)))
REPRESENTATION_ITEM('')
SURFACE()
);
#674=(
BOUNDED_SURFACE()
B_SPLINE_SURFACE(3,2,((#117513,#117514,#117515),(#117516,#117517,#117518),
(#117519,#117520,#117521),(#117522,#117523,#117524)),.UNSPECIFIED.,.F.,
 .F.,.F.)
B_SPLINE_SURFACE_WITH_KNOTS((4,4),(3,3),(3.46944695195361E-18,0.021796204571187),
(0.,1.),.UNSPECIFIED.)
GEOMETRIC_REPRESENTATION_ITEM()
RATIONAL_B_SPLINE_SURFACE(((1.,0.589755109947558,1.),(1.,0.582954304126345,
1.),(1.,0.5762202770521,1.),(1.,0.569548667318326,1.)))
REPRESENTATION_ITEM('')
SURFACE()
);
#675=(
BOUNDED_SURFACE()
B_SPLINE_SURFACE(3,2,((#117655,#117656,#117657),(#117658,#117659,#117660),
(#117661,#117662,#117663),(#117664,#117665,#117666)),.UNSPECIFIED.,.F.,
 .F.,.F.)
B_SPLINE_SURFACE_WITH_KNOTS((4,4),(3,3),(0.0202956399837716,0.0208946966749047),
(0.,1.),.UNSPECIFIED.)
GEOMETRIC_REPRESENTATION_ITEM()
RATIONAL_B_SPLINE_SURFACE(((1.,0.900606830835888,1.),(1.,0.900744730186861,
1.),(1.,0.900880175303985,1.),(1.,0.901013225320941,1.)))
REPRESENTATION_ITEM('')
SURFACE()
);
#676=(
BOUNDED_SURFACE()
B_SPLINE_SURFACE(3,2,((#117795,#117796,#117797),(#117798,#117799,#117800),
(#117801,#117802,#117803),(#117804,#117805,#117806)),.UNSPECIFIED.,.F.,
 .F.,.F.)
B_SPLINE_SURFACE_WITH_KNOTS((4,4),(3,3),(0.0202956399837716,0.0208946966749047),
(0.,1.),.UNSPECIFIED.)
GEOMETRIC_REPRESENTATION_ITEM()
RATIONAL_B_SPLINE_SURFACE(((1.,0.900606830835888,1.),(1.,0.900744730186861,
1.),(1.,0.900880175303985,1.),(1.,0.901013225320945,1.)))
REPRESENTATION_ITEM('')
SURFACE()
);
#677=(
BOUNDED_SURFACE()
B_SPLINE_SURFACE(3,2,((#117874,#117875,#117876),(#117877,#117878,#117879),
(#117880,#117881,#117882),(#117883,#117884,#117885),(#117886,#117887,#117888),
(#117889,#117890,#117891)),.UNSPECIFIED.,.F.,.F.,.F.)
B_SPLINE_SURFACE_WITH_KNOTS((4,2,4),(3,3),(-3.91613824701764E-16,0.00171225828678246,
0.00342451657356532),(0.,1.),.UNSPECIFIED.)
GEOMETRIC_REPRESENTATION_ITEM()
RATIONAL_B_SPLINE_SURFACE(((1.,0.72236396206076,1.),(1.,0.754627162299658,
1.),(1.,0.784410335463938,1.),(1.,0.840322687513901,1.),(1.,0.866450826488529,
1.),(1.,0.891002048128323,1.)))
REPRESENTATION_ITEM('')
SURFACE()
);
#678=(
BOUNDED_SURFACE()
B_SPLINE_SURFACE(3,2,((#117954,#117955,#117956),(#117957,#117958,#117959),
(#117960,#117961,#117962),(#117963,#117964,#117965)),.UNSPECIFIED.,.F.,
 .F.,.F.)
B_SPLINE_SURFACE_WITH_KNOTS((4,4),(3,3),(-2.47198095326695E-17,0.00134908113441829),
(0.,1.),.UNSPECIFIED.)
GEOMETRIC_REPRESENTATION_ITEM()
RATIONAL_B_SPLINE_SURFACE(((1.,0.733870268857972,1.),(1.,0.732490347214879,
1.),(1.,0.729805870370646,1.),(1.,0.726096315248079,1.)))
REPRESENTATION_ITEM('')
SURFACE()
);
#679=(
BOUNDED_SURFACE()
B_SPLINE_SURFACE(3,2,((#118008,#118009,#118010),(#118011,#118012,#118013),
(#118014,#118015,#118016),(#118017,#118018,#118019)),.UNSPECIFIED.,.F.,
 .F.,.F.)
B_SPLINE_SURFACE_WITH_KNOTS((4,4),(3,3),(-2.47198095326695E-17,0.00134908113441829),
(0.,1.),.UNSPECIFIED.)
GEOMETRIC_REPRESENTATION_ITEM()
RATIONAL_B_SPLINE_SURFACE(((1.,0.733870268857972,1.),(1.,0.732490347214879,
1.),(1.,0.729805870370646,1.),(1.,0.726096315248079,1.)))
REPRESENTATION_ITEM('')
SURFACE()
);
#680=(
BOUNDED_SURFACE()
B_SPLINE_SURFACE(3,2,((#118064,#118065,#118066),(#118067,#118068,#118069),
(#118070,#118071,#118072),(#118073,#118074,#118075),(#118076,#118077,#118078),
(#118079,#118080,#118081)),.UNSPECIFIED.,.F.,.F.,.F.)
B_SPLINE_SURFACE_WITH_KNOTS((4,2,4),(3,3),(-3.91613824701764E-16,0.00171225828678246,
0.00342451657356532),(0.,1.),.UNSPECIFIED.)
GEOMETRIC_REPRESENTATION_ITEM()
RATIONAL_B_SPLINE_SURFACE(((1.,0.72236396206076,1.),(1.,0.754627162299658,
1.),(1.,0.784410335463938,1.),(1.,0.840322687513901,1.),(1.,0.866450826488529,
1.),(1.,0.891002048128323,1.)))
REPRESENTATION_ITEM('')
SURFACE()
);
#681=(
BOUNDED_SURFACE()
B_SPLINE_SURFACE(3,2,((#118126,#118127,#118128),(#118129,#118130,#118131),
(#118132,#118133,#118134),(#118135,#118136,#118137)),.UNSPECIFIED.,.F.,
 .F.,.F.)
B_SPLINE_SURFACE_WITH_KNOTS((4,4),(3,3),(-2.68882138776405E-17,0.0219667000314471),
(0.,1.),.UNSPECIFIED.)
GEOMETRIC_REPRESENTATION_ITEM()
RATIONAL_B_SPLINE_SURFACE(((1.,0.711953374255438,1.),(1.,0.706077500943757,
1.),(1.,0.699485071832413,1.),(1.,0.69182137541396,1.)))
REPRESENTATION_ITEM('')
SURFACE()
);
#682=(
BOUNDED_SURFACE()
B_SPLINE_SURFACE(3,2,((#118149,#118150,#118151),(#118152,#118153,#118154),
(#118155,#118156,#118157),(#118158,#118159,#118160),(#118161,#118162,#118163),
(#118164,#118165,#118166),(#118167,#118168,#118169),(#118170,#118171,#118172),
(#118173,#118174,#118175),(#118176,#118177,#118178),(#118179,#118180,#118181),
(#118182,#118183,#118184)),.UNSPECIFIED.,.F.,.F.,.F.)
B_SPLINE_SURFACE_WITH_KNOTS((4,2,2,2,2,4),(3,3),(0.000172409107124498,0.000489736488695152,
0.000807063870265806,0.000965727561051133,0.00112439125183646,0.00144171863340711),
(0.,0.918321305818406),.UNSPECIFIED.)
GEOMETRIC_REPRESENTATION_ITEM()
RATIONAL_B_SPLINE_SURFACE(((1.,0.751951140289055,0.959479386091153),(1.,
0.751081875924352,0.959337385334738),(1.,0.750063810360441,0.959171076803035),
(1.,0.747713047253236,0.958787062281182),(1.,0.746415224348434,0.958575053320895),
(1.,0.744306886267655,0.958230640718233),(1.,0.743576049622121,0.958111253152498),
(1.,0.742056365361419,0.957863001500533),(1.,0.741269149563411,0.957734403983692),
(1.,0.738871436402237,0.957342719823639),(1.,0.737208890423033,0.957071130654442),
(1.,0.735480646509667,0.9567888092423)))
REPRESENTATION_ITEM('')
SURFACE()
);
#683=(
BOUNDED_SURFACE()
B_SPLINE_SURFACE(3,2,((#118350,#118351,#118352),(#118353,#118354,#118355),
(#118356,#118357,#118358),(#118359,#118360,#118361),(#118362,#118363,#118364),
(#118365,#118366,#118367)),.UNSPECIFIED.,.F.,.F.,.F.)
B_SPLINE_SURFACE_WITH_KNOTS((4,2,4),(3,3),(0.00123655829750285,0.00142922512672845,
0.00162189195595405),(0.,1.),.UNSPECIFIED.)
GEOMETRIC_REPRESENTATION_ITEM()
RATIONAL_B_SPLINE_SURFACE(((1.,0.666609535345549,1.),(1.,0.663165103855602,
1.),(1.,0.660607815251214,1.),(1.,0.657871111698494,1.),(1.,0.657640580310814,
1.),(1.,0.658697491371788,1.)))
REPRESENTATION_ITEM('')
SURFACE()
);
#684=(
BOUNDED_SURFACE()
B_SPLINE_SURFACE(3,2,((#118480,#118481,#118482),(#118483,#118484,#118485),
(#118486,#118487,#118488),(#118489,#118490,#118491),(#118492,#118493,#118494),
(#118495,#118496,#118497),(#118498,#118499,#118500),(#118501,#118502,#118503),
(#118504,#118505,#118506),(#118507,#118508,#118509),(#118510,#118511,#118512),
(#118513,#118514,#118515),(#118516,#118517,#118518),(#118519,#118520,#118521),
(#118522,#118523,#118524),(#118525,#118526,#118527),(#118528,#118529,#118530),
(#118531,#118532,#118533)),.UNSPECIFIED.,.F.,.F.,.F.)
B_SPLINE_SURFACE_WITH_KNOTS((4,2,2,2,2,2,2,2,4),(3,3),(0.091242894965532,
0.105485528803385,0.112606845722312,0.116167504181775,0.117947833411507,
0.11839291571894,0.118615456872656,0.118837998026373,0.119728162641239),
(0.,1.),.UNSPECIFIED.)
GEOMETRIC_REPRESENTATION_ITEM()
RATIONAL_B_SPLINE_SURFACE(((1.,0.932172603585285,1.),(1.,0.934602753177395,
1.),(1.,0.937299919727655,1.),(1.,0.941872873911547,1.),(1.,0.943485425277809,
1.),(1.,0.94605580308617,1.),(1.,0.946937896098172,1.),(1.,0.948301602658363,
1.),(1.,0.948762933301821,1.),(1.,0.949348321740484,1.),(1.,0.949465835674864,
1.),(1.,0.949642766022,1.),(1.,0.949701970702875,1.),(1.,0.949819587295925,
1.),(1.,0.949878461460776,1.),(1.,0.95017316294865,1.),(1.,0.950409982265153,
1.),(1.,0.950647876552919,1.)))
REPRESENTATION_ITEM('')
SURFACE()
);
#685=(
BOUNDED_SURFACE()
B_SPLINE_SURFACE(3,2,((#118553,#118554,#118555),(#118556,#118557,#118558),
(#118559,#118560,#118561),(#118562,#118563,#118564),(#118565,#118566,#118567),
(#118568,#118569,#118570)),.UNSPECIFIED.,.F.,.F.,.F.)
B_SPLINE_SURFACE_WITH_KNOTS((4,2,4),(3,3),(0.07057665608224,0.0820800032233745,
0.093583350364509),(0.,1.),.UNSPECIFIED.)
GEOMETRIC_REPRESENTATION_ITEM()
RATIONAL_B_SPLINE_SURFACE(((1.,0.931359839148932,1.),(1.,0.933201337134163,
1.),(1.,0.935237303560647,1.),(1.,0.939852710690985,1.),(1.,0.942431635592895,
1.),(1.,0.945397015693174,1.)))
REPRESENTATION_ITEM('')
SURFACE()
);
#686=(
BOUNDED_SURFACE()
B_SPLINE_SURFACE(3,2,((#118641,#118642,#118643),(#118644,#118645,#118646),
(#118647,#118648,#118649),(#118650,#118651,#118652)),.UNSPECIFIED.,.F.,
 .F.,.F.)
B_SPLINE_SURFACE_WITH_KNOTS((4,4),(3,3),(0.000640475795684712,0.0229136491896437),
(0.284029442984183,1.),.UNSPECIFIED.)
GEOMETRIC_REPRESENTATION_ITEM()
RATIONAL_B_SPLINE_SURFACE(((0.931525662307996,0.879459085345921,1.),(0.930008881375413,
0.876788973197253,1.),(0.928241405957166,0.873677543269994,1.),(0.925867060504482,
0.869497790939149,1.)))
REPRESENTATION_ITEM('')
SURFACE()
);
#687=(
BOUNDED_SURFACE()
B_SPLINE_SURFACE(3,2,((#118796,#118797,#118798),(#118799,#118800,#118801),
(#118802,#118803,#118804),(#118805,#118806,#118807)),.UNSPECIFIED.,.F.,
 .F.,.F.)
B_SPLINE_SURFACE_WITH_KNOTS((4,4),(3,3),(-1.86482773667507E-17,0.000975580687048644),
(0.,1.),.UNSPECIFIED.)
GEOMETRIC_REPRESENTATION_ITEM()
RATIONAL_B_SPLINE_SURFACE(((1.,0.94257877728744,1.),(1.,0.951846107080362,
1.),(1.,0.960652039850891,1.),(1.,0.968622823622538,1.)))
REPRESENTATION_ITEM('')
SURFACE()
);
#688=(
BOUNDED_SURFACE()
B_SPLINE_SURFACE(3,2,((#118828,#118829,#118830),(#118831,#118832,#118833),
(#118834,#118835,#118836),(#118837,#118838,#118839),(#118840,#118841,#118842),
(#118843,#118844,#118845),(#118846,#118847,#118848),(#118849,#118850,#118851),
(#118852,#118853,#118854),(#118855,#118856,#118857),(#118858,#118859,#118860),
(#118861,#118862,#118863),(#118864,#118865,#118866),(#118867,#118868,#118869)),
 .UNSPECIFIED.,.F.,.F.,.F.)
B_SPLINE_SURFACE_WITH_KNOTS((4,2,2,2,2,2,4),(3,3),(0.,0.000448181428457599,
0.000896362856915198,0.0013445442853728,0.0017927257138304,0.00268908857074559,
0.00358545142766079),(0.,1.),.UNSPECIFIED.)
GEOMETRIC_REPRESENTATION_ITEM()
RATIONAL_B_SPLINE_SURFACE(((1.,0.968622823622544,1.),(1.,0.970928927601575,
1.),(1.,0.971725568866546,1.),(1.,0.969403531216429,1.),(1.,0.966312591057871,
1.),(1.,0.956750702908267,1.),(1.,0.950336581784272,1.),(1.,0.934945602997519,
1.),(1.,0.925915752328107,1.),(1.,0.894857637924931,1.),(1.,0.86927172114247,
1.),(1.,0.807530610430465,1.),(1.,0.771295192731162,1.),(1.,0.728225219382402,
1.)))
REPRESENTATION_ITEM('')
SURFACE()
);
#689=(
BOUNDED_SURFACE()
B_SPLINE_SURFACE(3,2,((#118936,#118937,#118938),(#118939,#118940,#118941),
(#118942,#118943,#118944),(#118945,#118946,#118947),(#118948,#118949,#118950),
(#118951,#118952,#118953),(#118954,#118955,#118956),(#118957,#118958,#118959),
(#118960,#118961,#118962),(#118963,#118964,#118965),(#118966,#118967,#118968),
(#118969,#118970,#118971),(#118972,#118973,#118974),(#118975,#118976,#118977),
(#118978,#118979,#118980),(#118981,#118982,#118983),(#118984,#118985,#118986),
(#118987,#118988,#118989),(#118990,#118991,#118992),(#118993,#118994,#118995)),
 .UNSPECIFIED.,.F.,.F.,.F.)
B_SPLINE_SURFACE_WITH_KNOTS((4,2,2,2,2,2,2,2,2,4),(3,3),(-0.000146064523433404,
0.000365159071385275,0.000547738793623092,0.000730318515860909,0.000821608376979818,
0.000912898238098727,0.00100418809921764,0.00109547796033654,0.00127805768257436,
0.00160670118258064),(-0.00159134328788309,1.),.UNSPECIFIED.)
GEOMETRIC_REPRESENTATION_ITEM()
RATIONAL_B_SPLINE_SURFACE(((1.00038374483301,0.87942738819055,1.),(1.00031625112979,
0.900633907154529,1.),(1.00025133626005,0.921030156735138,1.),(1.00016762607413,
0.947331893940907,1.),(1.00014592868002,0.954149214335323,1.),(1.00010409492808,
0.967293377590655,1.),(1.00008384008525,0.973657448431276,1.),(1.00005591123694,
0.982432691498638,1.),(1.00004718271175,0.985175193777351,1.),(1.00003202565982,
0.98993753891455,1.),(1.00002546752036,0.991998106080354,1.),(1.00002032635548,
0.993613459887579,1.),(1.00002239733526,0.992962758120945,1.),(1.00003284206364,
0.989681024864429,1.),(1.00004063015299,0.987234007489059,1.),(1.00006599175634,
0.979265392689627,1.),(1.00008585000529,0.97302593163039,1.),(1.0001425667101,
0.955205545155479,1.),(1.00018191106109,0.942843551583534,1.),(1.00022226350418,
0.93016481551539,1.)))
REPRESENTATION_ITEM('')
SURFACE()
);
#690=(
BOUNDED_SURFACE()
B_SPLINE_SURFACE(3,2,((#119084,#119085,#119086),(#119087,#119088,#119089),
(#119090,#119091,#119092),(#119093,#119094,#119095),(#119096,#119097,#119098),
(#119099,#119100,#119101),(#119102,#119103,#119104),(#119105,#119106,#119107),
(#119108,#119109,#119110),(#119111,#119112,#119113),(#119114,#119115,#119116),
(#119117,#119118,#119119)),.UNSPECIFIED.,.F.,.F.,.F.)
B_SPLINE_SURFACE_WITH_KNOTS((4,2,2,2,2,4),(3,3),(-6.02859133291467E-5,0.000150715288159474,
0.000226072932239275,0.000301430576319076,0.000452145864478677,0.000663147267902164),
(0.,1.00100506202168),.UNSPECIFIED.)
GEOMETRIC_REPRESENTATION_ITEM()
RATIONAL_B_SPLINE_SURFACE(((1.,0.97029417548491,1.00005971239209),(1.,0.977975200276622,
1.00004427257947),(1.,0.986336959495829,1.00002746440622),(1.,0.987871795349442,
1.00002437919577),(1.,0.987315825772092,1.00002549676359),(1.,0.984671150020546,
1.0000308128899),(1.,0.982621667529369,1.00003493260393),(1.,0.975474249020196,
1.00004929980173),(1.,0.969347303436532,1.00006161572236),(1.,0.953842204431395,
1.00009278289466),(1.,0.943778806405122,1.00011301157299),(1.,0.93353189143749,
1.00013360914314)))
REPRESENTATION_ITEM('')
SURFACE()
);
#691=(
BOUNDED_SURFACE()
B_SPLINE_SURFACE(3,2,((#119222,#119223,#119224),(#119225,#119226,#119227),
(#119228,#119229,#119230),(#119231,#119232,#119233)),.UNSPECIFIED.,.F.,
 .F.,.F.)
B_SPLINE_SURFACE_WITH_KNOTS((4,4),(3,3),(0.086547508497542,0.0919702783781644),
(0.354419989395031,1.),.UNSPECIFIED.)
GEOMETRIC_REPRESENTATION_ITEM()
RATIONAL_B_SPLINE_SURFACE(((0.946511601282365,0.924540939678747,1.),(0.94694216595103,
0.925148361214704,1.),(0.947368599948296,0.925749955382678,1.),(0.947790925762161,
0.926345753907735,1.)))
REPRESENTATION_ITEM('')
SURFACE()
);
#692=(
BOUNDED_SURFACE()
B_SPLINE_SURFACE(3,2,((#119317,#119318,#119319),(#119320,#119321,#119322),
(#119323,#119324,#119325),(#119326,#119327,#119328)),.UNSPECIFIED.,.F.,
 .F.,.F.)
B_SPLINE_SURFACE_WITH_KNOTS((4,4),(3,3),(3.46944695195361E-18,0.021796204571187),
(0.,1.),.UNSPECIFIED.)
GEOMETRIC_REPRESENTATION_ITEM()
RATIONAL_B_SPLINE_SURFACE(((1.,0.589755109947558,1.),(1.,0.582954304126345,
1.),(1.,0.5762202770521,1.),(1.,0.569548667318326,1.)))
REPRESENTATION_ITEM('')
SURFACE()
);
#693=(
BOUNDED_SURFACE()
B_SPLINE_SURFACE(3,2,((#119459,#119460,#119461),(#119462,#119463,#119464),
(#119465,#119466,#119467),(#119468,#119469,#119470),(#119471,#119472,#119473),
(#119474,#119475,#119476),(#119477,#119478,#119479),(#119480,#119481,#119482),
(#119483,#119484,#119485),(#119486,#119487,#119488),(#119489,#119490,#119491),
(#119492,#119493,#119494)),.UNSPECIFIED.,.F.,.F.,.F.)
B_SPLINE_SURFACE_WITH_KNOTS((4,2,2,2,2,4),(3,3),(0.000172409107124498,0.000489736488695152,
0.000807063870265806,0.000965727561051133,0.00112439125183646,0.00144171863340711),
(0.0816786941815919,1.),.UNSPECIFIED.)
GEOMETRIC_REPRESENTATION_ITEM()
RATIONAL_B_SPLINE_SURFACE(((0.959479386091154,0.751951140289055,1.),(0.95933738533479,
0.751081875924663,1.),(0.959171076802969,0.750063810360031,1.),(0.95878706228125,
0.747713047253645,1.),(0.958575053320852,0.74641522434816,1.),(0.958230640718255,
0.744306886267786,1.),(0.958111253152526,0.743576049622285,1.),(0.957863001500509,
0.742056365361262,1.),(0.957734403983756,0.741269149563795,1.),(0.957342719823513,
0.738871436401458,1.),(0.95707113065454,0.737208890423623,1.),(0.956788809242301,
0.735480646509667,1.)))
REPRESENTATION_ITEM('')
SURFACE()
);
#694=(
BOUNDED_SURFACE()
B_SPLINE_SURFACE(3,2,((#119662,#119663,#119664),(#119665,#119666,#119667),
(#119668,#119669,#119670),(#119671,#119672,#119673)),.UNSPECIFIED.,.F.,
 .F.,.F.)
B_SPLINE_SURFACE_WITH_KNOTS((4,4),(3,3),(-2.68882138776405E-17,0.0219667000314469),
(0.,1.),.UNSPECIFIED.)
GEOMETRIC_REPRESENTATION_ITEM()
RATIONAL_B_SPLINE_SURFACE(((1.,0.711953374255438,1.),(1.,0.706077500943746,
1.),(1.,0.699485071832412,1.),(1.,0.69182137541396,1.)))
REPRESENTATION_ITEM('')
SURFACE()
);
#695=(
BOUNDED_SURFACE()
B_SPLINE_SURFACE(3,2,((#119683,#119684,#119685),(#119686,#119687,#119688),
(#119689,#119690,#119691),(#119692,#119693,#119694),(#119695,#119696,#119697),
(#119698,#119699,#119700)),.UNSPECIFIED.,.F.,.F.,.F.)
B_SPLINE_SURFACE_WITH_KNOTS((4,2,4),(3,3),(0.00123655829750285,0.00142922512672845,
0.00162189195595405),(0.,1.),.UNSPECIFIED.)
GEOMETRIC_REPRESENTATION_ITEM()
RATIONAL_B_SPLINE_SURFACE(((1.,0.666609535345554,1.),(1.,0.663165103853521,
1.),(1.,0.66060781525401,1.),(1.,0.657871111695744,1.),(1.,0.657640580312937,
1.),(1.,0.65869749137178,1.)))
REPRESENTATION_ITEM('')
SURFACE()
);
#696=(
BOUNDED_SURFACE()
B_SPLINE_SURFACE(3,2,((#119756,#119757,#119758),(#119759,#119760,#119761),
(#119762,#119763,#119764),(#119765,#119766,#119767),(#119768,#119769,#119770),
(#119771,#119772,#119773),(#119774,#119775,#119776),(#119777,#119778,#119779),
(#119780,#119781,#119782),(#119783,#119784,#119785),(#119786,#119787,#119788),
(#119789,#119790,#119791),(#119792,#119793,#119794),(#119795,#119796,#119797),
(#119798,#119799,#119800),(#119801,#119802,#119803),(#119804,#119805,#119806),
(#119807,#119808,#119809)),.UNSPECIFIED.,.F.,.F.,.F.)
B_SPLINE_SURFACE_WITH_KNOTS((4,2,2,2,2,2,2,2,4),(3,3),(0.091242894965532,
0.105485528803385,0.112606845722312,0.116167504181775,0.117947833411507,
0.11839291571894,0.118615456872656,0.118837998026373,0.119728162641239),
(0.,1.),.UNSPECIFIED.)
GEOMETRIC_REPRESENTATION_ITEM()
RATIONAL_B_SPLINE_SURFACE(((1.,0.932172603585285,1.),(1.,0.934602753177395,
1.),(1.,0.937299919727655,1.),(1.,0.941872873911547,1.),(1.,0.943485425278205,
1.),(1.,0.946055803085972,1.),(1.,0.946937896098174,1.),(1.,0.948301602658365,
1.),(1.,0.94876293330027,1.),(1.,0.94934832174087,1.),(1.,0.949465835675221,
1.),(1.,0.949642766021826,1.),(1.,0.949701970702888,1.),(1.,0.949819587295914,
1.),(1.,0.949878461460849,1.),(1.,0.950173162948351,1.),(1.,0.950409982265378,
1.),(1.,0.950647876552919,1.)))
REPRESENTATION_ITEM('')
SURFACE()
);
#697=(
BOUNDED_SURFACE()
B_SPLINE_SURFACE(3,2,((#119883,#119884,#119885),(#119886,#119887,#119888),
(#119889,#119890,#119891),(#119892,#119893,#119894),(#119895,#119896,#119897),
(#119898,#119899,#119900)),.UNSPECIFIED.,.F.,.F.,.F.)
B_SPLINE_SURFACE_WITH_KNOTS((4,2,4),(3,3),(0.07057665608224,0.0820800032233745,
0.0935833503645091),(0.,1.),.UNSPECIFIED.)
GEOMETRIC_REPRESENTATION_ITEM()
RATIONAL_B_SPLINE_SURFACE(((1.,0.931359839148932,1.),(1.,0.933201337134163,
1.),(1.,0.935237303560648,1.),(1.,0.939852710690986,1.),(1.,0.942431635592893,
1.),(1.,0.945397015693175,1.)))
REPRESENTATION_ITEM('')
SURFACE()
);
#698=(
BOUNDED_SURFACE()
B_SPLINE_SURFACE(3,2,((#119920,#119921,#119922),(#119923,#119924,#119925),
(#119926,#119927,#119928),(#119929,#119930,#119931)),.UNSPECIFIED.,.F.,
 .F.,.F.)
B_SPLINE_SURFACE_WITH_KNOTS((4,4),(3,3),(0.000640475795684716,0.0229136491896437),
(0.,0.715970557015843),.UNSPECIFIED.)
GEOMETRIC_REPRESENTATION_ITEM()
RATIONAL_B_SPLINE_SURFACE(((1.,0.879459085345906,0.931525662307994),(1.,
0.8767889731973,0.930008881375446),(1.,0.873677543269935,0.928241405957139),
(1.,0.869497790939172,0.925867060504502)))
REPRESENTATION_ITEM('')
SURFACE()
);
#699=(
BOUNDED_SURFACE()
B_SPLINE_SURFACE(3,2,((#120089,#120090,#120091),(#120092,#120093,#120094),
(#120095,#120096,#120097),(#120098,#120099,#120100),(#120101,#120102,#120103),
(#120104,#120105,#120106),(#120107,#120108,#120109),(#120110,#120111,#120112),
(#120113,#120114,#120115),(#120116,#120117,#120118)),.UNSPECIFIED.,.F.,
 .F.,.F.)
B_SPLINE_SURFACE_WITH_KNOTS((4,2,2,2,4),(3,3),(3.24217810071203,3.64977950313072,
4.05738090554941,4.46498230796809,4.87258371038678),(0.,1.),
 .UNSPECIFIED.)
GEOMETRIC_REPRESENTATION_ITEM()
RATIONAL_B_SPLINE_SURFACE(((1.,0.72609631524809,1.),(1.,0.725841742628379,
1.),(1.,0.725056777061859,1.),(1.,0.722558268663162,1.),(1.,0.720843088145081,
1.),(1.,0.71674265144357,1.),(1.,0.714358823223497,1.),(1.,0.709296699429274,
1.),(1.,0.706620856799246,1.),(1.,0.704014724455975,1.)))
REPRESENTATION_ITEM('')
SURFACE()
);
#700=(
BOUNDED_SURFACE()
B_SPLINE_SURFACE(3,2,((#120129,#120130,#120131),(#120132,#120133,#120134),
(#120135,#120136,#120137),(#120138,#120139,#120140),(#120141,#120142,#120143),
(#120144,#120145,#120146),(#120147,#120148,#120149),(#120150,#120151,#120152),
(#120153,#120154,#120155),(#120156,#120157,#120158)),.UNSPECIFIED.,.F.,
 .F.,.F.)
B_SPLINE_SURFACE_WITH_KNOTS((4,2,2,2,4),(3,3),(3.24217810071203,3.64977950313072,
4.05738090554941,4.46498230796809,4.87258371038678),(0.,1.),
 .UNSPECIFIED.)
GEOMETRIC_REPRESENTATION_ITEM()
RATIONAL_B_SPLINE_SURFACE(((1.,0.72609631524809,1.),(1.,0.725841742628379,
1.),(1.,0.725056777061859,1.),(1.,0.722558268663162,1.),(1.,0.720843088145081,
1.),(1.,0.71674265144357,1.),(1.,0.714358823223497,1.),(1.,0.709296699429274,
1.),(1.,0.706620856799246,1.),(1.,0.704014724455975,1.)))
REPRESENTATION_ITEM('')
SURFACE()
);
#701=(
BOUNDED_SURFACE()
B_SPLINE_SURFACE(3,2,((#120175,#120176,#120177),(#120178,#120179,#120180),
(#120181,#120182,#120183),(#120184,#120185,#120186)),.UNSPECIFIED.,.F.,
 .F.,.F.)
B_SPLINE_SURFACE_WITH_KNOTS((4,4),(3,3),(3.04568714935258,3.14159265358979),
(0.,1.),.UNSPECIFIED.)
GEOMETRIC_REPRESENTATION_ITEM()
RATIONAL_B_SPLINE_SURFACE(((1.,0.703971954142288,1.),(1.,0.703971954142288,
1.),(1.,0.704014724455975,1.),(1.,0.704014724455975,1.)))
REPRESENTATION_ITEM('')
SURFACE()
);
#702=(
BOUNDED_SURFACE()
B_SPLINE_SURFACE(3,2,((#120188,#120189,#120190),(#120191,#120192,#120193),
(#120194,#120195,#120196),(#120197,#120198,#120199)),.UNSPECIFIED.,.F.,
 .F.,.F.)
B_SPLINE_SURFACE_WITH_KNOTS((4,4),(3,3),(-3.03576608295941E-18,0.00275016275288652),
(0.,1.),.UNSPECIFIED.)
GEOMETRIC_REPRESENTATION_ITEM()
RATIONAL_B_SPLINE_SURFACE(((1.,0.85967849801306,1.),(1.,0.862155071557859,
1.),(1.,0.864387880791255,1.),(1.,0.866517930183255,1.)))
REPRESENTATION_ITEM('')
SURFACE()
);
#703=(
BOUNDED_SURFACE()
B_SPLINE_SURFACE(3,2,((#120210,#120211,#120212),(#120213,#120214,#120215),
(#120216,#120217,#120218),(#120219,#120220,#120221),(#120222,#120223,#120224),
(#120225,#120226,#120227),(#120228,#120229,#120230),(#120231,#120232,#120233),
(#120234,#120235,#120236),(#120237,#120238,#120239),(#120240,#120241,#120242),
(#120243,#120244,#120245)),.UNSPECIFIED.,.F.,.F.,.F.)
B_SPLINE_SURFACE_WITH_KNOTS((4,2,2,2,2,4),(3,3),(0.,0.00194978541777795,
0.00292467812666693,0.00389957083555591,0.00584935625333386,0.00779914167111181),
(0.,1.),.UNSPECIFIED.)
GEOMETRIC_REPRESENTATION_ITEM()
RATIONAL_B_SPLINE_SURFACE(((1.,0.947520440587767,1.),(1.,0.942740273543688,
1.),(1.,0.937033518082314,1.),(1.,0.927444230023017,1.),(1.,0.924073967673699,
1.),(1.,0.917016102700818,1.),(1.,0.913322927946637,1.),(1.,0.901985095893551,
1.),(1.,0.894024868258376,1.),(1.,0.877387690572261,1.),(1.,0.86870840896092,
1.),(1.,0.859678498012811,1.)))
REPRESENTATION_ITEM('')
SURFACE()
);
#704=(
BOUNDED_SURFACE()
B_SPLINE_SURFACE(3,2,((#120267,#120268,#120269),(#120270,#120271,#120272),
(#120273,#120274,#120275),(#120276,#120277,#120278)),.UNSPECIFIED.,.F.,
 .F.,.F.)
B_SPLINE_SURFACE_WITH_KNOTS((4,4),(3,3),(-3.03576608295941E-17,0.0228896105935565),
(0.,1.),.UNSPECIFIED.)
GEOMETRIC_REPRESENTATION_ITEM()
RATIONAL_B_SPLINE_SURFACE(((1.,0.942308521183388,1.),(1.,0.944491080899959,
1.),(1.,0.946133714041368,1.),(1.,0.947520440587766,1.)))
REPRESENTATION_ITEM('')
SURFACE()
);
#705=(
BOUNDED_SURFACE()
B_SPLINE_SURFACE(3,2,((#120289,#120290,#120291),(#120292,#120293,#120294),
(#120295,#120296,#120297),(#120298,#120299,#120300)),.UNSPECIFIED.,.F.,
 .F.,.F.)
B_SPLINE_SURFACE_WITH_KNOTS((4,4),(3,3),(0.0105286437536093,0.0158561416687052),
(0.,1.),.UNSPECIFIED.)
GEOMETRIC_REPRESENTATION_ITEM()
RATIONAL_B_SPLINE_SURFACE(((1.,0.897564169859521,1.),(1.,0.897241245054637,
1.),(1.,0.89699033118019,1.),(1.,0.896801348580528,1.)))
REPRESENTATION_ITEM('')
SURFACE()
);
#706=(
BOUNDED_SURFACE()
B_SPLINE_SURFACE(3,2,((#120302,#120303,#120304),(#120305,#120306,#120307),
(#120308,#120309,#120310),(#120311,#120312,#120313)),.UNSPECIFIED.,.F.,
 .F.,.F.)
B_SPLINE_SURFACE_WITH_KNOTS((4,4),(3,3),(-0.000984380791341109,0.0234771587126385),
(-0.000984380791341109,1.),.UNSPECIFIED.)
GEOMETRIC_REPRESENTATION_ITEM()
RATIONAL_B_SPLINE_SURFACE(((1.00010262824403,0.947871674796603,1.),(1.00010552426077,
0.946400690820905,1.),(1.00010898247232,0.944644149255886,1.),(1.00011372650884,
0.942234494087918,1.)))
REPRESENTATION_ITEM('')
SURFACE()
);
#707=(
BOUNDED_SURFACE()
B_SPLINE_SURFACE(3,2,((#120324,#120325,#120326),(#120327,#120328,#120329),
(#120330,#120331,#120332),(#120333,#120334,#120335),(#120336,#120337,#120338),
(#120339,#120340,#120341),(#120342,#120343,#120344),(#120345,#120346,#120347),
(#120348,#120349,#120350),(#120351,#120352,#120353),(#120354,#120355,#120356),
(#120357,#120358,#120359),(#120360,#120361,#120362),(#120363,#120364,#120365),
(#120366,#120367,#120368),(#120369,#120370,#120371),(#120372,#120373,#120374),
(#120375,#120376,#120377)),.UNSPECIFIED.,.F.,.F.,.F.)
B_SPLINE_SURFACE_WITH_KNOTS((4,2,2,2,2,2,2,2,4),(3,3),(0.00936202579159545,
0.00990157779501034,0.0104411297984252,0.0107109058001327,0.0109806818018401,
0.011520233805255,0.0120597858086699,0.0125993378120848,0.0136784418189145),
(0.,1.),.UNSPECIFIED.)
GEOMETRIC_REPRESENTATION_ITEM()
RATIONAL_B_SPLINE_SURFACE(((1.,0.947744117295323,1.),(1.,0.953783300130328,
1.),(1.,0.958245710938759,1.),(1.,0.961892089688276,1.),(1.,0.961015096019884,
1.),(1.,0.956009641508509,1.),(1.,0.953738476722059,1.),(1.,0.948380804718449,
1.),(1.,0.945274524336066,1.),(1.,0.934865630713761,1.),(1.,0.926741610254917,
1.),(1.,0.909007436570815,1.),(1.,0.899284931981906,1.),(1.,0.879057836818204,
1.),(1.,0.868481224820761,1.),(1.,0.835412016818704,1.),(1.,0.811397907242337,
1.),(1.,0.786271086600415,1.)))
REPRESENTATION_ITEM('')
SURFACE()
);
#708=(
BOUNDED_SURFACE()
B_SPLINE_SURFACE(3,2,((#120472,#120473,#120474),(#120475,#120476,#120477),
(#120478,#120479,#120480),(#120481,#120482,#120483),(#120484,#120485,#120486),
(#120487,#120488,#120489),(#120490,#120491,#120492),(#120493,#120494,#120495),
(#120496,#120497,#120498),(#120499,#120500,#120501),(#120502,#120503,#120504),
(#120505,#120506,#120507)),.UNSPECIFIED.,.F.,.F.,.F.)
B_SPLINE_SURFACE_WITH_KNOTS((4,2,2,2,2,4),(3,3),(-1.49278376118667E-15,
0.000362238944063941,0.000543358416096659,0.000724477888129376,0.00108671683219481,
0.00144895577626024),(0.,1.),.UNSPECIFIED.)
GEOMETRIC_REPRESENTATION_ITEM()
RATIONAL_B_SPLINE_SURFACE(((1.,0.943643538935096,1.),(1.,0.948052044376662,
1.),(1.,0.95080857851042,1.),(1.,0.951770521426739,1.),(1.,0.951569929015055,
1.),(1.,0.950151318304891,1.),(1.,0.948913934591451,1.),(1.,0.943900883356849,
1.),(1.,0.938732570340337,1.),(1.,0.926252860765163,1.),(1.,0.918894252731329,
1.),(1.,0.910685821650176,1.)))
REPRESENTATION_ITEM('')
SURFACE()
);
#709=(
BOUNDED_SURFACE()
B_SPLINE_SURFACE(3,2,((#120543,#120544,#120545),(#120546,#120547,#120548),
(#120549,#120550,#120551),(#120552,#120553,#120554)),.UNSPECIFIED.,.F.,
 .F.,.F.)
B_SPLINE_SURFACE_WITH_KNOTS((4,4),(3,3),(0.,0.00538666526705317),(0.,1.),
 .UNSPECIFIED.)
GEOMETRIC_REPRESENTATION_ITEM()
RATIONAL_B_SPLINE_SURFACE(((1.,0.912175300108023,1.),(1.,0.91169275729227,
1.),(1.,0.911199772522338,1.),(1.,0.910685821649524,1.)))
REPRESENTATION_ITEM('')
SURFACE()
);
#710=(
BOUNDED_SURFACE()
B_SPLINE_SURFACE(3,2,((#120559,#120560,#120561),(#120562,#120563,#120564),
(#120565,#120566,#120567),(#120568,#120569,#120570)),.UNSPECIFIED.,.F.,
 .F.,.F.)
B_SPLINE_SURFACE_WITH_KNOTS((4,4),(3,3),(0.,0.00766040095690006),(0.,1.),
 .UNSPECIFIED.)
GEOMETRIC_REPRESENTATION_ITEM()
RATIONAL_B_SPLINE_SURFACE(((1.,0.926115079130703,1.),(1.,0.925529293410106,
1.),(1.,0.924894697041834,1.),(1.,0.924188223435064,1.)))
REPRESENTATION_ITEM('')
SURFACE()
);
#711=(
BOUNDED_SURFACE()
B_SPLINE_SURFACE(3,2,((#120577,#120578,#120579),(#120580,#120581,#120582),
(#120583,#120584,#120585),(#120586,#120587,#120588)),.UNSPECIFIED.,.F.,
 .F.,.F.)
B_SPLINE_SURFACE_WITH_KNOTS((4,4),(3,3),(0.,0.00766040095690006),(0.,1.),
 .UNSPECIFIED.)
GEOMETRIC_REPRESENTATION_ITEM()
RATIONAL_B_SPLINE_SURFACE(((1.,0.926115079130703,1.),(1.,0.925529293410106,
1.),(1.,0.924894697041834,1.),(1.,0.924188223435064,1.)))
REPRESENTATION_ITEM('')
SURFACE()
);
#712=(
BOUNDED_SURFACE()
B_SPLINE_SURFACE(3,2,((#120595,#120596,#120597),(#120598,#120599,#120600),
(#120601,#120602,#120603),(#120604,#120605,#120606)),.UNSPECIFIED.,.F.,
 .F.,.F.)
B_SPLINE_SURFACE_WITH_KNOTS((4,4),(3,3),(0.,0.00538666526705317),(0.,1.),
 .UNSPECIFIED.)
GEOMETRIC_REPRESENTATION_ITEM()
RATIONAL_B_SPLINE_SURFACE(((1.,0.912175300108023,1.),(1.,0.91169275729227,
1.),(1.,0.911199772522338,1.),(1.,0.910685821649524,1.)))
REPRESENTATION_ITEM('')
SURFACE()
);
#713=(
BOUNDED_SURFACE()
B_SPLINE_SURFACE(3,2,((#120613,#120614,#120615),(#120616,#120617,#120618),
(#120619,#120620,#120621),(#120622,#120623,#120624),(#120625,#120626,#120627),
(#120628,#120629,#120630),(#120631,#120632,#120633),(#120634,#120635,#120636),
(#120637,#120638,#120639),(#120640,#120641,#120642),(#120643,#120644,#120645),
(#120646,#120647,#120648)),.UNSPECIFIED.,.F.,.F.,.F.)
B_SPLINE_SURFACE_WITH_KNOTS((4,2,2,2,2,4),(3,3),(-1.49278376118667E-15,
0.000362238944064292,0.000543358416097184,0.000724477888130076,0.00108671683219586,
0.00144895577626164),(0.,1.),.UNSPECIFIED.)
GEOMETRIC_REPRESENTATION_ITEM()
RATIONAL_B_SPLINE_SURFACE(((1.,0.943643538935096,1.),(1.,0.948052044376735,
1.),(1.,0.950808578510333,1.),(1.,0.951770521426784,1.),(1.,0.951569929015501,
1.),(1.,0.950151318304437,1.),(1.,0.9489139345916,1.),(1.,0.943900883356523,
1.),(1.,0.938732570339583,1.),(1.,0.92625286076589,1.),(1.,0.918894252730765,
1.),(1.,0.910685821650176,1.)))
REPRESENTATION_ITEM('')
SURFACE()
);
#714=(
BOUNDED_SURFACE()
B_SPLINE_SURFACE(3,2,((#120682,#120683,#120684),(#120685,#120686,#120687),
(#120688,#120689,#120690),(#120691,#120692,#120693)),.UNSPECIFIED.,.F.,
 .F.,.F.)
B_SPLINE_SURFACE_WITH_KNOTS((4,4),(3,3),(0.,0.00542269977990935),(0.,1.),
 .UNSPECIFIED.)
GEOMETRIC_REPRESENTATION_ITEM()
RATIONAL_B_SPLINE_SURFACE(((1.,0.943643538934983,1.),(1.,0.943785058087735,
1.),(1.,0.943951945781132,1.),(1.,0.944143037967263,1.)))
REPRESENTATION_ITEM('')
SURFACE()
);
#715=(
BOUNDED_SURFACE()
B_SPLINE_SURFACE(3,2,((#120699,#120700,#120701),(#120702,#120703,#120704),
(#120705,#120706,#120707),(#120708,#120709,#120710),(#120711,#120712,#120713),
(#120714,#120715,#120716),(#120717,#120718,#120719),(#120720,#120721,#120722),
(#120723,#120724,#120725),(#120726,#120727,#120728)),.UNSPECIFIED.,.F.,
 .F.,.F.)
B_SPLINE_SURFACE_WITH_KNOTS((4,2,2,2,4),(3,3),(2.2701899584317,2.64752455359557,
3.02485914875943,3.40219374392329,3.77952833908715),(0.,1.),
 .UNSPECIFIED.)
GEOMETRIC_REPRESENTATION_ITEM()
RATIONAL_B_SPLINE_SURFACE(((1.,0.722363962059755,1.),(1.,0.724622895207636,
1.),(1.,0.726504363789701,1.),(1.,0.729280494547014,1.),(1.,0.730172708907161,
1.),(1.,0.730852094411932,1.),(1.,0.730639133775914,1.),(1.,0.729134853180914,
1.),(1.,0.727845898245967,1.),(1.,0.726096315248088,1.)))
REPRESENTATION_ITEM('')
SURFACE()
);
#716=(
BOUNDED_SURFACE()
B_SPLINE_SURFACE(3,2,((#120745,#120746,#120747),(#120748,#120749,#120750),
(#120751,#120752,#120753),(#120754,#120755,#120756),(#120757,#120758,#120759),
(#120760,#120761,#120762),(#120763,#120764,#120765),(#120766,#120767,#120768),
(#120769,#120770,#120771),(#120772,#120773,#120774)),.UNSPECIFIED.,.F.,
 .F.,.F.)
B_SPLINE_SURFACE_WITH_KNOTS((4,2,2,2,4),(3,3),(0.100585447122376,0.508186849541061,
0.915788251959747,1.32338965437843,1.73100359450903),(0.,1.00001253771191),
 .UNSPECIFIED.)
GEOMETRIC_REPRESENTATION_ITEM()
RATIONAL_B_SPLINE_SURFACE(((1.,0.726092881122592,1.00000686833709),(1.,
0.725838305290978,1.00000687472069),(1.,0.725053329929764,1.00000689440428),
(1.,0.722554790151844,1.00000695705623),(1.,0.720839588200684,1.00000700006564),
(1.,0.716739099999995,1.00000710288712),(1.,0.71435524199402,1.00000716266337),
(1.,0.709292976761938,1.00000728960182),(1.,0.706617013920488,1.00000735670272),
(1.,0.704010772983193,1.00000742205532)))
REPRESENTATION_ITEM('')
SURFACE()
);
#717=(
BOUNDED_SURFACE()
B_SPLINE_SURFACE(3,2,((#120785,#120786,#120787),(#120788,#120789,#120790),
(#120791,#120792,#120793),(#120794,#120795,#120796),(#120797,#120798,#120799),
(#120800,#120801,#120802),(#120803,#120804,#120805),(#120806,#120807,#120808),
(#120809,#120810,#120811),(#120812,#120813,#120814)),.UNSPECIFIED.,.F.,
 .F.,.F.)
B_SPLINE_SURFACE_WITH_KNOTS((4,2,2,2,4),(3,3),(1.41058906159919,1.81820299921136,
2.22580440163005,2.63340580404873,3.04100720646742),(0.,1.00001253519348),
 .UNSPECIFIED.)
GEOMETRIC_REPRESENTATION_ITEM()
RATIONAL_B_SPLINE_SURFACE(((1.,0.704010773776921,1.00000742056444),(1.,
0.706617014692463,1.00000735522497),(1.,0.709292977509626,1.00000728813754),
(1.,0.714355242713456,1.0000071612246),(1.,0.71673910071268,1.00000710146035),
(1.,0.720839588904403,1.00000699865953),(1.,0.722554790850539,1.00000695565875),
(1.,0.725053330622211,1.00000689301939),(1.,0.725838305981414,1.00000687333976),
(1.,0.726092881812401,1.00000686695744)))
REPRESENTATION_ITEM('')
SURFACE()
);
#718=(
BOUNDED_SURFACE()
B_SPLINE_SURFACE(3,2,((#120839,#120840,#120841),(#120842,#120843,#120844),
(#120845,#120846,#120847),(#120848,#120849,#120850),(#120851,#120852,#120853),
(#120854,#120855,#120856),(#120857,#120858,#120859),(#120860,#120861,#120862),
(#120863,#120864,#120865),(#120866,#120867,#120868)),.UNSPECIFIED.,.F.,
 .F.,.F.)
B_SPLINE_SURFACE_WITH_KNOTS((4,2,2,2,4),(3,3),(1.41058906159921,1.81820299921136,
2.22580440163005,2.63340580404873,3.04100720646742),(-1.2535193455284E-5,
1.),.UNSPECIFIED.)
GEOMETRIC_REPRESENTATION_ITEM()
RATIONAL_B_SPLINE_SURFACE(((1.00000742056442,0.704010773776928,1.),(1.00000735522495,
0.70661701469247,1.),(1.00000728813753,0.709292977509633,1.),(1.00000716122458,
0.714355242713462,1.),(1.00000710146034,0.716739100712686,1.),(1.00000699865952,
0.720839588904409,1.),(1.00000695565874,0.722554790850545,1.),(1.00000689301938,
0.725053330622217,1.),(1.00000687333975,0.72583830598142,1.),(1.00000686695743,
0.726092881812407,1.)))
REPRESENTATION_ITEM('')
SURFACE()
);
#719=(
BOUNDED_SURFACE()
B_SPLINE_SURFACE(3,2,((#120879,#120880,#120881),(#120882,#120883,#120884),
(#120885,#120886,#120887),(#120888,#120889,#120890),(#120891,#120892,#120893),
(#120894,#120895,#120896),(#120897,#120898,#120899),(#120900,#120901,#120902),
(#120903,#120904,#120905),(#120906,#120907,#120908)),.UNSPECIFIED.,.F.,
 .F.,.F.)
B_SPLINE_SURFACE_WITH_KNOTS((4,2,2,2,4),(3,3),(0.100585447122376,0.508186849541061,
0.915788251959747,1.32338965437843,1.73100359450902),(-1.25377119005158E-5,
1.),.UNSPECIFIED.)
GEOMETRIC_REPRESENTATION_ITEM()
RATIONAL_B_SPLINE_SURFACE(((1.00000686833709,0.726092881122595,1.),(1.00000687472068,
0.725838305290982,1.),(1.00000689440427,0.725053329929767,1.),(1.00000695705622,
0.722554790151847,1.),(1.00000700006563,0.720839588200688,1.),(1.00000710288711,
0.716739099999999,1.),(1.00000716266336,0.714355241994023,1.),(1.00000728960181,
0.709292976761942,1.),(1.00000735670271,0.706617013920492,1.),(1.00000742205531,
0.704010772983197,1.)))
REPRESENTATION_ITEM('')
SURFACE()
);
#720=(
BOUNDED_SURFACE()
B_SPLINE_SURFACE(3,2,((#120925,#120926,#120927),(#120928,#120929,#120930),
(#120931,#120932,#120933),(#120934,#120935,#120936),(#120937,#120938,#120939),
(#120940,#120941,#120942),(#120943,#120944,#120945),(#120946,#120947,#120948),
(#120949,#120950,#120951),(#120952,#120953,#120954)),.UNSPECIFIED.,.F.,
 .F.,.F.)
B_SPLINE_SURFACE_WITH_KNOTS((4,2,2,2,4),(3,3),(2.2701899584317,2.64752455359557,
3.02485914875943,3.40219374392329,3.77952833908715),(0.,1.),
 .UNSPECIFIED.)
GEOMETRIC_REPRESENTATION_ITEM()
RATIONAL_B_SPLINE_SURFACE(((1.,0.722363962059755,1.),(1.,0.724622895207636,
1.),(1.,0.726504363789701,1.),(1.,0.729280494547014,1.),(1.,0.730172708907161,
1.),(1.,0.730852094411932,1.),(1.,0.730639133775914,1.),(1.,0.729134853180914,
1.),(1.,0.727845898245967,1.),(1.,0.726096315248088,1.)))
REPRESENTATION_ITEM('')
SURFACE()
);
#721=(
BOUNDED_SURFACE()
B_SPLINE_SURFACE(3,2,((#120969,#120970,#120971),(#120972,#120973,#120974),
(#120975,#120976,#120977),(#120978,#120979,#120980)),.UNSPECIFIED.,.F.,
 .F.,.F.)
B_SPLINE_SURFACE_WITH_KNOTS((4,4),(3,3),(0.,0.00542269977990935),(0.,1.),
 .UNSPECIFIED.)
GEOMETRIC_REPRESENTATION_ITEM()
RATIONAL_B_SPLINE_SURFACE(((1.,0.943643538934983,1.),(1.,0.943785058087736,
1.),(1.,0.943951945781131,1.),(1.,0.944143037967263,1.)))
REPRESENTATION_ITEM('')
SURFACE()
);
#722=(
BOUNDED_SURFACE()
B_SPLINE_SURFACE(3,2,((#120982,#120983,#120984),(#120985,#120986,#120987),
(#120988,#120989,#120990),(#120991,#120992,#120993),(#120994,#120995,#120996),
(#120997,#120998,#120999),(#121000,#121001,#121002),(#121003,#121004,#121005),
(#121006,#121007,#121008),(#121009,#121010,#121011),(#121012,#121013,#121014),
(#121015,#121016,#121017),(#121018,#121019,#121020),(#121021,#121022,#121023),
(#121024,#121025,#121026),(#121027,#121028,#121029),(#121030,#121031,#121032),
(#121033,#121034,#121035)),.UNSPECIFIED.,.F.,.F.,.F.)
B_SPLINE_SURFACE_WITH_KNOTS((4,2,2,2,2,2,2,2,4),(3,3),(-0.000431271840486261,
0.00243372687230203,0.00365059030845306,0.00486745374460409,0.00730118061690614,
0.00851804405305717,0.00973490748920819,0.0146023612338123,0.0199010868189026),
(-4.46028822653812E-5,1.00043627532371),.UNSPECIFIED.)
GEOMETRIC_REPRESENTATION_ITEM()
RATIONAL_B_SPLINE_SURFACE(((1.00000186200682,0.979117726195889,1.00001822002851),
(1.00000185249186,0.979224435711258,1.00001812692321),(1.00000189925871,
0.97869994883903,1.00001858454415),(1.00000203593511,0.977167132794857,
1.0000199219441),(1.00000208591804,0.976606577763099,1.00002041103493),
(1.00000220129759,0.975312604273868,1.00002154004196),(1.000002266264,0.974584010736865,
1.00002217574835),(1.00000248027485,0.972183894221788,1.00002426987813),
(1.00000264828389,0.970299684823023,1.0000259138729),(1.00000293143731,
0.967124139409202,1.00002868457347),(1.0000030309762,0.966007817758079,
1.00002965857719),(1.00000323659462,0.963701821907705,1.00003167058558),
(1.00000334303879,0.962508058160322,1.00003271215843),(1.00000389156571,
0.956356367737489,1.00003807958038),(1.00000438147554,0.95086206387444,
1.00004287342487),(1.00000548633235,0.93847117353736,1.00005368462183),
(1.00000610201193,0.93156637091776,1.000059709143),(1.00000674849203,0.924316142641007,
1.00006603505211)))
REPRESENTATION_ITEM('')
SURFACE()
);
#723=(
BOUNDED_SURFACE()
B_SPLINE_SURFACE(3,2,((#121058,#121059,#121060),(#121061,#121062,#121063),
(#121064,#121065,#121066),(#121067,#121068,#121069)),.UNSPECIFIED.,.F.,
 .F.,.F.)
B_SPLINE_SURFACE_WITH_KNOTS((4,4),(3,3),(0.,0.00273518176342789),(0.,1.),
 .UNSPECIFIED.)
GEOMETRIC_REPRESENTATION_ITEM()
RATIONAL_B_SPLINE_SURFACE(((1.,0.723793081261023,1.),(1.,0.706064908201719,
1.),(1.,0.688490244791777,1.),(1.,0.67116455633566,1.)))
REPRESENTATION_ITEM('')
SURFACE()
);
#724=(
BOUNDED_SURFACE()
B_SPLINE_SURFACE(3,2,((#121078,#121079,#121080),(#121081,#121082,#121083),
(#121084,#121085,#121086),(#121087,#121088,#121089),(#121090,#121091,#121092),
(#121093,#121094,#121095),(#121096,#121097,#121098),(#121099,#121100,#121101),
(#121102,#121103,#121104),(#121105,#121106,#121107),(#121108,#121109,#121110),
(#121111,#121112,#121113),(#121114,#121115,#121116),(#121117,#121118,#121119),
(#121120,#121121,#121122),(#121123,#121124,#121125),(#121126,#121127,#121128),
(#121129,#121130,#121131),(#121132,#121133,#121134),(#121135,#121136,#121137),
(#121138,#121139,#121140),(#121141,#121142,#121143)),.UNSPECIFIED.,.F.,
 .F.,.F.)
B_SPLINE_SURFACE_WITH_KNOTS((4,2,2,2,2,2,2,2,2,2,4),(3,3),(-8.26981877117622E-6,
0.00114907528883709,0.00172361293325563,0.00229815057767418,0.00287268822209272,
0.00344722586651127,0.00459630115534836,0.00574537644418545,0.00689445173302254,
0.00804352702185963,0.00920087213800303),(0.,1.00000826982731),
 .UNSPECIFIED.)
GEOMETRIC_REPRESENTATION_ITEM()
RATIONAL_B_SPLINE_SURFACE(((1.,0.866518925811505,1.00000220773086),(1.,
0.866431784971919,1.00000220917214),(1.,0.864832990495783,1.00000223561565),
(1.,0.860351209863793,1.00000230974276),(1.,0.858528060890297,1.00000233989701),
(1.,0.854341914935609,1.00000240913442),(1.,0.851971029757354,1.00000244834804),
(1.,0.846735929963145,1.00000253493478),(1.,0.843854139294378,1.00000258259861),
(1.,0.837766824020356,1.0000026832807),(1.,0.83455776481403,1.00000273635743),
(1.,0.824536036094111,1.00000290211336),(1.,0.817262027090921,1.00000302242296),
(1.,0.802516055255451,1.00000326631624),(1.,0.79503873427524,1.00000338998854),
(1.,0.78006371708479,1.00000363767016),(1.,0.772509829593135,1.00000376260885),
(1.,0.75767932645607,1.00000400790025),(1.,0.750340863449883,1.00000412927589),
(1.,0.736029541653701,1.00000436598021),(1.,0.729008139296056,1.00000448211178),
(1.,0.723676241369811,1.00000457029953)))
REPRESENTATION_ITEM('')
SURFACE()
);
#725=(
BOUNDED_SURFACE()
B_SPLINE_SURFACE(3,2,((#121210,#121211,#121212),(#121213,#121214,#121215),
(#121216,#121217,#121218),(#121219,#121220,#121221),(#121222,#121223,#121224),
(#121225,#121226,#121227),(#121228,#121229,#121230),(#121231,#121232,#121233),
(#121234,#121235,#121236),(#121237,#121238,#121239),(#121240,#121241,#121242),
(#121243,#121244,#121245),(#121246,#121247,#121248),(#121249,#121250,#121251)),
 .UNSPECIFIED.,.F.,.F.,.F.)
B_SPLINE_SURFACE_WITH_KNOTS((4,2,2,2,2,2,4),(3,3),(0.030769314833025,0.0324272372811191,
0.0332084100355964,0.0339895827900737,0.0347707555445511,0.0355519282990284,
0.0371715648714796),(-0.000125027686582041,1.),.UNSPECIFIED.)
GEOMETRIC_REPRESENTATION_ITEM()
RATIONAL_B_SPLINE_SURFACE(((1.0000125154169,0.949949418237264,1.),(1.00001269125432,
0.949246224284127,1.),(1.00001309575227,0.947628590818793,1.),(1.00001386248908,
0.94456232272481,1.),(1.00001413540284,0.943470909391604,1.),(1.00001470995453,
0.941173211559694,1.),(1.00001500824393,0.939980318200766,1.),(1.00001560911237,
0.93757737664287,1.),(1.00001591174777,0.936367103117717,1.),(1.00001650742614,
0.933984917318685,1.),(1.00001680196796,0.932807010918015,1.),(1.00001766290739,
0.929364015797706,1.),(1.00001817826642,0.927303036146676,1.),(1.00001860376185,
0.925601431350082,1.)))
REPRESENTATION_ITEM('')
SURFACE()
);
#726=(
BOUNDED_SURFACE()
B_SPLINE_SURFACE(3,2,((#121300,#121301,#121302),(#121303,#121304,#121305),
(#121306,#121307,#121308),(#121309,#121310,#121311)),.UNSPECIFIED.,.F.,
 .F.,.F.)
B_SPLINE_SURFACE_WITH_KNOTS((4,4),(3,3),(0.,0.00154554945840529),(0.,1.),
 .UNSPECIFIED.)
GEOMETRIC_REPRESENTATION_ITEM()
RATIONAL_B_SPLINE_SURFACE(((1.,0.67116455633604,1.),(1.,0.669661249489889,
1.),(1.,0.668143076976703,1.),(1.,0.666609535345515,1.)))
REPRESENTATION_ITEM('')
SURFACE()
);
#727=(
BOUNDED_SURFACE()
B_SPLINE_SURFACE(3,2,((#121319,#121320,#121321),(#121322,#121323,#121324),
(#121325,#121326,#121327),(#121328,#121329,#121330)),.UNSPECIFIED.,.F.,
 .F.,.F.)
B_SPLINE_SURFACE_WITH_KNOTS((4,4),(3,3),(-6.23502957501583E-5,0.00277019292350893),
(0.,1.00006235622132),.UNSPECIFIED.)
GEOMETRIC_REPRESENTATION_ITEM()
RATIONAL_B_SPLINE_SURFACE(((1.,0.949479685487061,1.00000630051182),(1.,
0.954671027116491,1.00000565308693),(1.,0.959460772978983,1.00000505574603),
(1.,0.963655814534757,1.00000453257215)))
REPRESENTATION_ITEM('')
SURFACE()
);
#728=(
BOUNDED_SURFACE()
B_SPLINE_SURFACE(3,2,((#121339,#121340,#121341),(#121342,#121343,#121344),
(#121345,#121346,#121347),(#121348,#121349,#121350)),.UNSPECIFIED.,.F.,
 .F.,.F.)
B_SPLINE_SURFACE_WITH_KNOTS((4,4),(3,3),(-4.61479947486545E-5,0.00271547580779338),
(0.,1.00004615421632),.UNSPECIFIED.)
GEOMETRIC_REPRESENTATION_ITEM()
RATIONAL_B_SPLINE_SURFACE(((1.,0.963498634418551,1.00000336938384),(1.,
0.961121233961457,1.00000358883796),(1.,0.95762966493347,1.00000391113922),
(1.,0.95332160725387,1.00000430880927)))
REPRESENTATION_ITEM('')
SURFACE()
);
#729=(
BOUNDED_SURFACE()
B_SPLINE_SURFACE(3,2,((#121361,#121362,#121363),(#121364,#121365,#121366),
(#121367,#121368,#121369),(#121370,#121371,#121372),(#121373,#121374,#121375),
(#121376,#121377,#121378)),.UNSPECIFIED.,.F.,.F.,.F.)
B_SPLINE_SURFACE_WITH_KNOTS((4,2,4),(3,3),(-4.50959750517105E-5,0.00130340231369876,
0.00265190060244059),(0.,1.00006350774639),.UNSPECIFIED.)
GEOMETRIC_REPRESENTATION_ITEM()
RATIONAL_B_SPLINE_SURFACE(((1.,0.944547047198835,1.00000704338413),(1.,
0.935473627896347,1.00000819584895),(1.,0.926143163688677,1.00000938096246),
(1.,0.907289957565293,1.00001177561173),(1.,0.897763324818905,1.00001298564168),
(1.,0.888223455592946,1.00001419735287)))
REPRESENTATION_ITEM('')
SURFACE()
);
#730=(
BOUNDED_SURFACE()
B_SPLINE_SURFACE(3,2,((#121387,#121388,#121389),(#121390,#121391,#121392),
(#121393,#121394,#121395),(#121396,#121397,#121398),(#121399,#121400,#121401),
(#121402,#121403,#121404),(#121405,#121406,#121407),(#121408,#121409,#121410),
(#121411,#121412,#121413),(#121414,#121415,#121416)),.UNSPECIFIED.,.F.,
 .F.,.F.)
B_SPLINE_SURFACE_WITH_KNOTS((4,2,2,2,4),(3,3),(-0.000147192602161795,0.00158233071189982,
0.00316466142379967,0.00474699213569952,0.00647651544976301),(-8.00498886768649E-5,
1.00017562480094),.UNSPECIFIED.)
GEOMETRIC_REPRESENTATION_ITEM()
RATIONAL_B_SPLINE_SURFACE(((1.00000745936608,0.953399833775394,1.00001636697943),
(1.00000737551651,0.953923658971024,1.00001618300077),(1.00000734007769,
0.954145052447929,1.00001610524263),(1.00000728991018,0.95445845901307,
1.0000159951675),(1.00000727304637,0.954563810642802,1.00001595816575),
(1.00000722020938,0.954893894015589,1.00001584223337),(1.00000718403893,
0.955119858103607,1.00001576286993),(1.00000708361081,0.955747252821439,
1.00001554251544),(1.00000701935398,0.956148678252578,1.0000154015262),
(1.00000696119196,0.956512028127079,1.00001527390992)))
REPRESENTATION_ITEM('')
SURFACE()
);
#731=(
BOUNDED_SURFACE()
B_SPLINE_SURFACE(3,2,((#121427,#121428,#121429),(#121430,#121431,#121432),
(#121433,#121434,#121435),(#121436,#121437,#121438)),.UNSPECIFIED.,.F.,
 .F.,.F.)
B_SPLINE_SURFACE_WITH_KNOTS((4,4),(3,3),(0.,0.013446567251915),(0.,1.),
 .UNSPECIFIED.)
GEOMETRIC_REPRESENTATION_ITEM()
RATIONAL_B_SPLINE_SURFACE(((1.,0.976963728125316,1.),(1.,0.977692887652588,
1.),(1.,0.978416179195496,1.),(1.,0.979133314883585,1.)))
REPRESENTATION_ITEM('')
SURFACE()
);
#732=(
BOUNDED_SURFACE()
B_SPLINE_SURFACE(3,2,((#121445,#121446,#121447),(#121448,#121449,#121450),
(#121451,#121452,#121453),(#121454,#121455,#121456),(#121457,#121458,#121459),
(#121460,#121461,#121462),(#121463,#121464,#121465),(#121466,#121467,#121468),
(#121469,#121470,#121471),(#121472,#121473,#121474),(#121475,#121476,#121477),
(#121478,#121479,#121480),(#121481,#121482,#121483),(#121484,#121485,#121486)),
 .UNSPECIFIED.,.F.,.F.,.F.)
B_SPLINE_SURFACE_WITH_KNOTS((4,2,2,2,2,2,4),(3,3),(0.,0.00128276265353021,
0.00256552530706042,0.00320690663382553,0.00384828796059063,0.00448966928735574,
0.00513105061412085),(0.,1.),.UNSPECIFIED.)
GEOMETRIC_REPRESENTATION_ITEM()
RATIONAL_B_SPLINE_SURFACE(((1.,0.943639480476724,1.),(1.,0.948674680823018,
1.),(1.,0.953427853764095,1.),(1.,0.962169056941045,1.),(1.,0.96618093530575,
1.),(1.,0.971089220971494,1.),(1.,0.972548861648004,1.),(1.,0.975021494481762,
1.),(1.,0.976000767368186,1.),(1.,0.977366857607604,1.),(1.,0.977754066551247,
1.),(1.,0.977849021329894,1.),(1.,0.977566796643898,1.),(1.,0.976963728125305,
1.)))
REPRESENTATION_ITEM('')
SURFACE()
);
#733=(
BOUNDED_SURFACE()
B_SPLINE_SURFACE(3,2,((#121506,#121507,#121508),(#121509,#121510,#121511),
(#121512,#121513,#121514),(#121515,#121516,#121517)),.UNSPECIFIED.,.F.,
 .F.,.F.)
B_SPLINE_SURFACE_WITH_KNOTS((4,4),(3,3),(3.04568714935258,3.14159265358979),
(0.,1.),.UNSPECIFIED.)
GEOMETRIC_REPRESENTATION_ITEM()
RATIONAL_B_SPLINE_SURFACE(((1.,0.703971954142288,1.),(1.,0.703971954142288,
1.),(1.,0.704014724455975,1.),(1.,0.704014724455975,1.)))
REPRESENTATION_ITEM('')
SURFACE()
);
#734=(
BOUNDED_SURFACE()
B_SPLINE_SURFACE(3,2,((#121519,#121520,#121521),(#121522,#121523,#121524),
(#121525,#121526,#121527),(#121528,#121529,#121530)),.UNSPECIFIED.,.F.,
 .F.,.F.)
B_SPLINE_SURFACE_WITH_KNOTS((4,4),(3,3),(-0.000984380791339362,0.0234771587126368),
(0.,1.00098438079134),.UNSPECIFIED.)
GEOMETRIC_REPRESENTATION_ITEM()
RATIONAL_B_SPLINE_SURFACE(((1.,0.947871674796603,1.00010262824403),(1.,
0.946400690820905,1.00010552426077),(1.,0.944644149255886,1.00010898247232),
(1.,0.942234494087919,1.00011372650884)))
REPRESENTATION_ITEM('')
SURFACE()
);
#735=(
BOUNDED_SURFACE()
B_SPLINE_SURFACE(3,2,((#121541,#121542,#121543),(#121544,#121545,#121546),
(#121547,#121548,#121549),(#121550,#121551,#121552)),.UNSPECIFIED.,.F.,
 .F.,.F.)
B_SPLINE_SURFACE_WITH_KNOTS((4,4),(3,3),(0.0105286437536066,0.0158561416687053),
(0.,1.),.UNSPECIFIED.)
GEOMETRIC_REPRESENTATION_ITEM()
RATIONAL_B_SPLINE_SURFACE(((1.,0.897564169859521,1.),(1.,0.897241245054636,
1.),(1.,0.896990331180192,1.),(1.,0.896801348580528,1.)))
REPRESENTATION_ITEM('')
SURFACE()
);
#736=(
BOUNDED_SURFACE()
B_SPLINE_SURFACE(3,2,((#121554,#121555,#121556),(#121557,#121558,#121559),
(#121560,#121561,#121562),(#121563,#121564,#121565)),.UNSPECIFIED.,.F.,
 .F.,.F.)
B_SPLINE_SURFACE_WITH_KNOTS((4,4),(3,3),(-3.03576608295941E-17,0.0228896105935565),
(0.,1.),.UNSPECIFIED.)
GEOMETRIC_REPRESENTATION_ITEM()
RATIONAL_B_SPLINE_SURFACE(((1.,0.942308521183388,1.),(1.,0.944491080899959,
1.),(1.,0.946133714041368,1.),(1.,0.947520440587766,1.)))
REPRESENTATION_ITEM('')
SURFACE()
);
#737=(
BOUNDED_SURFACE()
B_SPLINE_SURFACE(3,2,((#121578,#121579,#121580),(#121581,#121582,#121583),
(#121584,#121585,#121586),(#121587,#121588,#121589),(#121590,#121591,#121592),
(#121593,#121594,#121595),(#121596,#121597,#121598),(#121599,#121600,#121601),
(#121602,#121603,#121604),(#121605,#121606,#121607),(#121608,#121609,#121610),
(#121611,#121612,#121613)),.UNSPECIFIED.,.F.,.F.,.F.)
B_SPLINE_SURFACE_WITH_KNOTS((4,2,2,2,2,4),(3,3),(0.,0.00194978541777795,
0.00292467812666693,0.00389957083555591,0.00584935625333386,0.00779914167111181),
(0.,1.),.UNSPECIFIED.)
GEOMETRIC_REPRESENTATION_ITEM()
RATIONAL_B_SPLINE_SURFACE(((1.,0.947520440587767,1.),(1.,0.942740273543688,
1.),(1.,0.937033518082314,1.),(1.,0.927444230023017,1.),(1.,0.924073967673699,
1.),(1.,0.917016102700818,1.),(1.,0.913322927946637,1.),(1.,0.901985095893551,
1.),(1.,0.894024868258376,1.),(1.,0.877387690572261,1.),(1.,0.86870840896092,
1.),(1.,0.859678498012811,1.)))
REPRESENTATION_ITEM('')
SURFACE()
);
#738=(
BOUNDED_SURFACE()
B_SPLINE_SURFACE(3,2,((#121635,#121636,#121637),(#121638,#121639,#121640),
(#121641,#121642,#121643),(#121644,#121645,#121646)),.UNSPECIFIED.,.F.,
 .F.,.F.)
B_SPLINE_SURFACE_WITH_KNOTS((4,4),(3,3),(-3.03576608295941E-18,0.00275016275288652),
(0.,1.),.UNSPECIFIED.)
GEOMETRIC_REPRESENTATION_ITEM()
RATIONAL_B_SPLINE_SURFACE(((1.,0.85967849801306,1.),(1.,0.862155071557859,
1.),(1.,0.864387880791255,1.),(1.,0.866517930183255,1.)))
REPRESENTATION_ITEM('')
SURFACE()
);
#739=(
BOUNDED_SURFACE()
B_SPLINE_SURFACE(3,2,((#121655,#121656,#121657),(#121658,#121659,#121660),
(#121661,#121662,#121663),(#121664,#121665,#121666),(#121667,#121668,#121669),
(#121670,#121671,#121672),(#121673,#121674,#121675),(#121676,#121677,#121678),
(#121679,#121680,#121681),(#121682,#121683,#121684),(#121685,#121686,#121687),
(#121688,#121689,#121690),(#121691,#121692,#121693),(#121694,#121695,#121696),
(#121697,#121698,#121699),(#121700,#121701,#121702),(#121703,#121704,#121705),
(#121706,#121707,#121708)),.UNSPECIFIED.,.F.,.F.,.F.)
B_SPLINE_SURFACE_WITH_KNOTS((4,2,2,2,2,2,2,2,4),(3,3),(0.00936202579159545,
0.00990157779501034,0.0104411297984252,0.0107109058001327,0.0109806818018401,
0.011520233805255,0.0120597858086699,0.0125993378120848,0.0136784418189145),
(0.,1.),.UNSPECIFIED.)
GEOMETRIC_REPRESENTATION_ITEM()
RATIONAL_B_SPLINE_SURFACE(((1.,0.947744117295323,1.),(1.,0.953783300130328,
1.),(1.,0.958245710938759,1.),(1.,0.961892089688276,1.),(1.,0.961015096019884,
1.),(1.,0.956009641508509,1.),(1.,0.953738476722059,1.),(1.,0.948380804718449,
1.),(1.,0.945274524336066,1.),(1.,0.934865630713761,1.),(1.,0.926741610254917,
1.),(1.,0.909007436570815,1.),(1.,0.899284931981906,1.),(1.,0.879057836818204,
1.),(1.,0.868481224820761,1.),(1.,0.835412016818704,1.),(1.,0.811397907242337,
1.),(1.,0.786271086600415,1.)))
REPRESENTATION_ITEM('')
SURFACE()
);
#740=(
BOUNDED_SURFACE()
B_SPLINE_SURFACE(3,2,((#121803,#121804,#121805),(#121806,#121807,#121808),
(#121809,#121810,#121811),(#121812,#121813,#121814),(#121815,#121816,#121817),
(#121818,#121819,#121820),(#121821,#121822,#121823),(#121824,#121825,#121826),
(#121827,#121828,#121829),(#121830,#121831,#121832),(#121833,#121834,#121835),
(#121836,#121837,#121838),(#121839,#121840,#121841),(#121842,#121843,#121844),
(#121845,#121846,#121847),(#121848,#121849,#121850),(#121851,#121852,#121853),
(#121854,#121855,#121856)),.UNSPECIFIED.,.F.,.F.,.F.)
B_SPLINE_SURFACE_WITH_KNOTS((4,2,2,2,2,2,2,2,4),(3,3),(-0.000431271830425147,
0.00243372687230203,0.00365059030845306,0.00486745374460409,0.00730118061690614,
0.00851804405305717,0.00973490748920819,0.0146023612338123,0.0199010868088415),
(-0.000436275314201408,1.00004460288298),.UNSPECIFIED.)
GEOMETRIC_REPRESENTATION_ITEM()
RATIONAL_B_SPLINE_SURFACE(((1.00001822002811,0.979117726197137,1.00000186200685),
(1.00001812692282,0.979224435707888,1.00000185249189),(1.00001858454375,
0.978699948835333,1.00000189925874),(1.00001992194366,0.977167132795103,
1.00000203593514),(1.00002041103448,0.976606577763213,1.00000208591807),
(1.00002154004149,0.975312604274177,1.00000220129763),(1.00002217574787,
0.974584010737043,1.00000226626403),(1.0000242698776,0.972183894222123,
1.00000248027489),(1.00002591387233,0.970299684823284,1.00000264828393),
(1.00002868457284,0.967124139409492,1.00000293143735),(1.00002965857654,
0.96600781775822,1.00000303097626),(1.00003167058489,0.963701821908182,
1.00000323659467),(1.00003271215772,0.962508058160742,1.00000334303884),
(1.00003807957956,0.956356367737513,1.00000389156577),(1.00004287342394,
0.950862063874872,1.00000438147562),(1.00005368462065,0.938471173550164,
1.00000548633244),(1.00005970914168,0.931566370944584,1.00000610201202),
(1.00006603505063,0.924316142682972,1.00000674849213)))
REPRESENTATION_ITEM('')
SURFACE()
);
#741=(
BOUNDED_SURFACE()
B_SPLINE_SURFACE(3,2,((#121879,#121880,#121881),(#121882,#121883,#121884),
(#121885,#121886,#121887),(#121888,#121889,#121890),(#121891,#121892,#121893),
(#121894,#121895,#121896),(#121897,#121898,#121899),(#121900,#121901,#121902),
(#121903,#121904,#121905),(#121906,#121907,#121908),(#121909,#121910,#121911),
(#121912,#121913,#121914),(#121915,#121916,#121917),(#121918,#121919,#121920)),
 .UNSPECIFIED.,.F.,.F.,.F.)
B_SPLINE_SURFACE_WITH_KNOTS((4,2,2,2,2,2,4),(3,3),(0.0307693148331566,0.0324272372811191,
0.0332084100355964,0.0339895827900737,0.0347707555445511,0.0355519282990284,
0.0371715648713483),(0.,1.00012502768644),.UNSPECIFIED.)
GEOMETRIC_REPRESENTATION_ITEM()
RATIONAL_B_SPLINE_SURFACE(((0.999999999999999,0.949949418237104,1.00001251541689),
(1.,0.949246224283878,1.00001269125431),(1.,0.947628590818635,1.00001309575225),
(1.,0.944562322724818,1.00001386248907),(1.,0.943470909391613,1.00001413540283),
(1.,0.941173211559702,1.00001470995452),(1.,0.939980318200775,1.00001500824391),
(1.,0.937577376642879,1.00001560911236),(1.,0.936367103117727,1.00001591174776),
(1.,0.933984917318695,1.00001650742611),(1.,0.932807010918024,1.00001680196794),
(1.,0.929364015797905,1.00001766290737),(1.,0.927303036147021,1.00001817826641),
(1.,0.925601431350507,1.00001860376182)))
REPRESENTATION_ITEM('')
SURFACE()
);
#742=(
BOUNDED_SURFACE()
B_SPLINE_SURFACE(3,2,((#121969,#121970,#121971),(#121972,#121973,#121974),
(#121975,#121976,#121977),(#121978,#121979,#121980),(#121981,#121982,#121983),
(#121984,#121985,#121986),(#121987,#121988,#121989),(#121990,#121991,#121992),
(#121993,#121994,#121995),(#121996,#121997,#121998),(#121999,#122000,#122001),
(#122002,#122003,#122004),(#122005,#122006,#122007),(#122008,#122009,#122010),
(#122011,#122012,#122013),(#122014,#122015,#122016),(#122017,#122018,#122019),
(#122020,#122021,#122022),(#122023,#122024,#122025),(#122026,#122027,#122028),
(#122029,#122030,#122031),(#122032,#122033,#122034)),.UNSPECIFIED.,.F.,
 .F.,.F.)
B_SPLINE_SURFACE_WITH_KNOTS((4,2,2,2,2,2,2,2,2,2,4),(3,3),(-8.26981833763323E-6,
0.00114907528883709,0.00172361293325563,0.00229815057767418,0.00287268822209272,
0.00344722586651127,0.00459630115534836,0.00574537644418545,0.00689445173302254,
0.00804352702185963,0.00920087213757045),(-8.26982687385201E-6,1.),
 .UNSPECIFIED.)
GEOMETRIC_REPRESENTATION_ITEM()
RATIONAL_B_SPLINE_SURFACE(((1.00000220773075,0.866518925811464,1.),(1.00000220917203,
0.866431784970812,1.),(1.00000223561553,0.864832990494676,1.),(1.00000230974263,
0.860351209863875,1.),(1.00000233989689,0.858528060890337,1.),(1.00000240913429,
0.854341914935694,1.),(1.00000244834791,0.851971029757759,1.),(1.00000253493465,
0.84673592996287,1.),(1.00000258259847,0.843854139294737,1.),(1.00000268328056,
0.83776682402014,1.),(1.00000273635729,0.834557764813436,1.),(1.00000290211321,
0.824536036095497,1.),(1.0000030224228,0.817262027090112,1.),(1.00000326631607,
0.802516055256433,1.),(1.00000338998837,0.79503873427658,1.),(1.00000363766997,
0.780063717083638,1.),(1.00000376260865,0.772509829593212,1.),(1.00000400790004,
0.757679326456196,1.),(1.00000412927567,0.75034086345057,1.),(1.00000436597998,
0.73602954165593,1.),(1.00000448211154,0.729008139301851,1.),(1.00000457029929,
0.7236762413759,1.)))
REPRESENTATION_ITEM('')
SURFACE()
);
#743=(
BOUNDED_SURFACE()
B_SPLINE_SURFACE(3,2,((#122103,#122104,#122105),(#122106,#122107,#122108),
(#122109,#122110,#122111),(#122112,#122113,#122114)),.UNSPECIFIED.,.F.,
 .F.,.F.)
B_SPLINE_SURFACE_WITH_KNOTS((4,4),(3,3),(0.,0.00273518176342789),(0.,1.),
 .UNSPECIFIED.)
GEOMETRIC_REPRESENTATION_ITEM()
RATIONAL_B_SPLINE_SURFACE(((1.,0.723793081261023,1.),(1.,0.706064908201674,
1.),(1.,0.688490244791794,1.),(1.,0.67116455633566,1.)))
REPRESENTATION_ITEM('')
SURFACE()
);
#744=(
BOUNDED_SURFACE()
B_SPLINE_SURFACE(3,2,((#122121,#122122,#122123),(#122124,#122125,#122126),
(#122127,#122128,#122129),(#122130,#122131,#122132)),.UNSPECIFIED.,.F.,
 .F.,.F.)
B_SPLINE_SURFACE_WITH_KNOTS((4,4),(3,3),(0.,0.00154554945840529),(0.,1.),
 .UNSPECIFIED.)
GEOMETRIC_REPRESENTATION_ITEM()
RATIONAL_B_SPLINE_SURFACE(((1.,0.67116455633604,1.),(1.,0.669661249489889,
1.),(1.,0.668143076976703,1.),(1.,0.666609535345515,1.)))
REPRESENTATION_ITEM('')
SURFACE()
);
#745=(
BOUNDED_SURFACE()
B_SPLINE_SURFACE(3,2,((#122134,#122135,#122136),(#122137,#122138,#122139),
(#122140,#122141,#122142),(#122143,#122144,#122145)),.UNSPECIFIED.,.F.,
 .F.,.F.)
B_SPLINE_SURFACE_WITH_KNOTS((4,4),(3,3),(-4.61479947538864E-5,0.00271547580779861),
(-4.61542163179999E-5,1.),.UNSPECIFIED.)
GEOMETRIC_REPRESENTATION_ITEM()
RATIONAL_B_SPLINE_SURFACE(((1.00000336938384,0.963498634418564,1.),(1.00000358883796,
0.961121233961465,1.),(1.00000391113922,0.957629664933465,1.),(1.00000430880927,
0.953321607253846,1.)))
REPRESENTATION_ITEM('')
SURFACE()
);
#746=(
BOUNDED_SURFACE()
B_SPLINE_SURFACE(3,2,((#122158,#122159,#122160),(#122161,#122162,#122163),
(#122164,#122165,#122166),(#122167,#122168,#122169)),.UNSPECIFIED.,.F.,
 .F.,.F.)
B_SPLINE_SURFACE_WITH_KNOTS((4,4),(3,3),(-6.23502957338309E-5,0.00277019292349261),
(-6.23562213965646E-5,1.),.UNSPECIFIED.)
GEOMETRIC_REPRESENTATION_ITEM()
RATIONAL_B_SPLINE_SURFACE(((1.00000630051183,0.949479685487147,1.),(1.00000565308694,
0.954671027116512,1.),(1.00000505574603,0.959460772978951,1.),(1.00000453257215,
0.963655814534683,1.)))
REPRESENTATION_ITEM('')
SURFACE()
);
#747=(
BOUNDED_SURFACE()
B_SPLINE_SURFACE(3,2,((#122182,#122183,#122184),(#122185,#122186,#122187),
(#122188,#122189,#122190),(#122191,#122192,#122193),(#122194,#122195,#122196),
(#122197,#122198,#122199),(#122200,#122201,#122202),(#122203,#122204,#122205),
(#122206,#122207,#122208),(#122209,#122210,#122211)),.UNSPECIFIED.,.F.,
 .F.,.F.)
B_SPLINE_SURFACE_WITH_KNOTS((4,2,2,2,4),(3,3),(-0.000147192602035591,0.00158233071189982,
0.00316466142379967,0.00474699213569952,0.00647651544963725),(-0.000175624801099223,
1.0000800498888),.UNSPECIFIED.)
GEOMETRIC_REPRESENTATION_ITEM()
RATIONAL_B_SPLINE_SURFACE(((1.00001636697944,0.953399833775494,1.00000745936609),
(1.00001618300078,0.953923658971043,1.00000737551652),(1.00001610524264,
0.954145052447927,1.0000073400777),(1.00001599516752,0.954458459013057,
1.00000728991019),(1.00001595816576,0.954563810642789,1.00000727304639),
(1.00001584223339,0.954893894015577,1.00000722020939),(1.00001576286995,
0.955119858103593,1.00000718403894),(1.00001554251545,0.955747252821403,
1.00000708361082),(1.00001540152621,0.956148678252507,1.00000701935399),
(1.00001527390993,0.956512028126988,1.00000696119197)))
REPRESENTATION_ITEM('')
SURFACE()
);
#748=(
BOUNDED_SURFACE()
B_SPLINE_SURFACE(3,2,((#122222,#122223,#122224),(#122225,#122226,#122227),
(#122228,#122229,#122230),(#122231,#122232,#122233),(#122234,#122235,#122236),
(#122237,#122238,#122239)),.UNSPECIFIED.,.F.,.F.,.F.)
B_SPLINE_SURFACE_WITH_KNOTS((4,2,4),(3,3),(-4.50959824969848E-5,0.00130340231369876,
0.00265190060988582),(-6.35077431223638E-5,1.),.UNSPECIFIED.)
GEOMETRIC_REPRESENTATION_ITEM()
RATIONAL_B_SPLINE_SURFACE(((1.00000704338375,0.944547047349246,1.),(1.00000819584851,
0.935473628000151,1.),(1.00000938096197,0.92614316374034,1.),(1.00001177561113,
0.907289957514175,1.),(1.00001298564102,0.897763324713505,1.),(1.00001419735215,
0.888223455435356,0.999999999999999)))
REPRESENTATION_ITEM('')
SURFACE()
);
#749=(
BOUNDED_SURFACE()
B_SPLINE_SURFACE(3,2,((#122248,#122249,#122250),(#122251,#122252,#122253),
(#122254,#122255,#122256),(#122257,#122258,#122259),(#122260,#122261,#122262),
(#122263,#122264,#122265),(#122266,#122267,#122268),(#122269,#122270,#122271),
(#122272,#122273,#122274),(#122275,#122276,#122277),(#122278,#122279,#122280),
(#122281,#122282,#122283),(#122284,#122285,#122286),(#122287,#122288,#122289)),
 .UNSPECIFIED.,.F.,.F.,.F.)
B_SPLINE_SURFACE_WITH_KNOTS((4,2,2,2,2,2,4),(3,3),(0.,0.00128276265353021,
0.00256552530706043,0.00320690663382553,0.00384828796059064,0.00448966928735575,
0.00513105061412085),(0.,1.),.UNSPECIFIED.)
GEOMETRIC_REPRESENTATION_ITEM()
RATIONAL_B_SPLINE_SURFACE(((1.,0.943639480476724,1.),(1.,0.948674680823074,
1.),(1.,0.953427853764027,1.),(1.,0.962169056941119,1.),(1.,0.966180935305963,
1.),(1.,0.971089220971388,1.),(1.,0.972548861647979,1.),(1.,0.975021494481785,
1.),(1.,0.976000767368375,1.),(1.,0.977366857607413,1.),(1.,0.97775406655139,
1.),(1.,0.977849021329751,1.),(1.,0.977566796644009,1.),(1.,0.976963728125305,
1.)))
REPRESENTATION_ITEM('')
SURFACE()
);
#750=(
BOUNDED_SURFACE()
B_SPLINE_SURFACE(3,2,((#122311,#122312,#122313),(#122314,#122315,#122316),
(#122317,#122318,#122319),(#122320,#122321,#122322)),.UNSPECIFIED.,.F.,
 .F.,.F.)
B_SPLINE_SURFACE_WITH_KNOTS((4,4),(3,3),(0.,0.013446567251915),(0.,1.),
 .UNSPECIFIED.)
GEOMETRIC_REPRESENTATION_ITEM()
RATIONAL_B_SPLINE_SURFACE(((1.,0.976963728125316,1.),(1.,0.977692887652588,
1.),(1.,0.978416179195496,1.),(1.,0.979133314883585,1.)))
REPRESENTATION_ITEM('')
SURFACE()
);
#751=(
BOUNDED_SURFACE()
B_SPLINE_SURFACE(2,2,((#129974,#129975,#129976),(#129977,#129978,#129979),
(#129980,#129981,#129982)),.UNSPECIFIED.,.F.,.F.,.F.)
B_SPLINE_SURFACE_WITH_KNOTS((3,3),(3,3),(-1.5707963267949,0.),(0.,1.5707963267949),
 .UNSPECIFIED.)
GEOMETRIC_REPRESENTATION_ITEM()
RATIONAL_B_SPLINE_SURFACE(((1.,0.707106781186548,1.),(0.707106781186547,
0.5,0.707106781186547),(1.,0.707106781186548,1.)))
REPRESENTATION_ITEM('')
SURFACE()
);
#752=(
BOUNDED_SURFACE()
B_SPLINE_SURFACE(2,2,((#129994,#129995,#129996),(#129997,#129998,#129999),
(#130000,#130001,#130002)),.UNSPECIFIED.,.F.,.F.,.F.)
B_SPLINE_SURFACE_WITH_KNOTS((3,3),(3,3),(-1.5707963267949,0.),(-1.5707963267949,
0.),.UNSPECIFIED.)
GEOMETRIC_REPRESENTATION_ITEM()
RATIONAL_B_SPLINE_SURFACE(((1.,0.707106781186548,1.),(0.707106781186547,
0.5,0.707106781186547),(1.,0.707106781186548,1.)))
REPRESENTATION_ITEM('')
SURFACE()
);
#753=(
BOUNDED_SURFACE()
B_SPLINE_SURFACE(2,2,((#130144,#130145,#130146),(#130147,#130148,#130149),
(#130150,#130151,#130152)),.UNSPECIFIED.,.F.,.F.,.F.)
B_SPLINE_SURFACE_WITH_KNOTS((3,3),(3,3),(-1.5707963267949,0.),(-3.14159265358979,
-1.5707963267949),.UNSPECIFIED.)
GEOMETRIC_REPRESENTATION_ITEM()
RATIONAL_B_SPLINE_SURFACE(((1.,0.707106781186548,1.),(0.707106781186553,
0.500000000000004,0.707106781186553),(1.,0.707106781186548,1.)))
REPRESENTATION_ITEM('')
SURFACE()
);
#754=(
BOUNDED_SURFACE()
B_SPLINE_SURFACE(2,2,((#130160,#130161,#130162),(#130163,#130164,#130165),
(#130166,#130167,#130168)),.UNSPECIFIED.,.F.,.F.,.F.)
B_SPLINE_SURFACE_WITH_KNOTS((3,3),(3,3),(-1.5707963267949,0.),(1.5707963267949,
3.14159265358979),.UNSPECIFIED.)
GEOMETRIC_REPRESENTATION_ITEM()
RATIONAL_B_SPLINE_SURFACE(((1.,0.707106781186548,1.),(0.707106781186553,
0.500000000000004,0.707106781186553),(1.,0.707106781186548,1.)))
REPRESENTATION_ITEM('')
SURFACE()
);
#755=(
BOUNDED_SURFACE()
B_SPLINE_SURFACE(3,2,((#132360,#132361,#132362),(#132363,#132364,#132365),
(#132366,#132367,#132368),(#132369,#132370,#132371),(#132372,#132373,#132374),
(#132375,#132376,#132377),(#132378,#132379,#132380),(#132381,#132382,#132383),
(#132384,#132385,#132386),(#132387,#132388,#132389),(#132390,#132391,#132392),
(#132393,#132394,#132395),(#132396,#132397,#132398),(#132399,#132400,#132401),
(#132402,#132403,#132404),(#132405,#132406,#132407),(#132408,#132409,#132410),
(#132411,#132412,#132413)),.UNSPECIFIED.,.F.,.F.,.F.)
B_SPLINE_SURFACE_WITH_KNOTS((4,2,2,2,2,2,2,2,4),(3,3),(4.70278451940636,
4.90033461787801,5.09788471634966,5.29543481482132,5.49298491329297,5.69053501176463,
5.88808511023628,6.08563520870793,6.28781515978109),(0.,1.0046298526015),
 .UNSPECIFIED.)
GEOMETRIC_REPRESENTATION_ITEM()
RATIONAL_B_SPLINE_SURFACE(((1.,0.714973861746017,1.00263925801538),(1.,
0.715074570648745,1.00263832548063),(1.,0.715175346804517,1.00263739232314),
(1.,0.71537313306344,1.00263556088069),(1.,0.715470137010245,1.00263466265274),
(1.,0.71565661045724,1.00263293596359),(1.,0.71574607524549,1.00263210754602),
(1.,0.715914001220181,1.002630552601),(1.,0.715992458218511,1.00262982611233),
(1.,0.716135329629181,1.00262850316518),(1.,0.716199740501749,1.00262790673949),
(1.,0.716312026959497,1.00262686699999),(1.,0.716359899784787,1.00262642371174),
(1.,0.716437258640866,1.00262570739154),(1.,0.71646674275296,1.00262543437736),
(1.,0.716506646263552,1.00262506488261),(1.,0.716516601622775,1.00262497269892),
(1.,0.716516123902597,1.00262497712247)))
REPRESENTATION_ITEM('')
SURFACE()
);
#756=(
BOUNDED_SURFACE()
B_SPLINE_SURFACE(3,2,((#132541,#132542,#132543),(#132544,#132545,#132546),
(#132547,#132548,#132549),(#132550,#132551,#132552),(#132553,#132554,#132555),
(#132556,#132557,#132558),(#132559,#132560,#132561),(#132562,#132563,#132564),
(#132565,#132566,#132567),(#132568,#132569,#132570),(#132571,#132572,#132573),
(#132574,#132575,#132576),(#132577,#132578,#132579),(#132580,#132581,#132582),
(#132583,#132584,#132585),(#132586,#132587,#132588),(#132589,#132590,#132591),
(#132592,#132593,#132594)),.UNSPECIFIED.,.F.,.F.,.F.)
B_SPLINE_SURFACE_WITH_KNOTS((4,2,2,2,2,2,2,2,4),(3,3),(4.70278451940636,
4.90033461787801,5.09788471634966,5.29543481482132,5.49298491329297,5.69053501176463,
5.88808511023628,6.08563520870793,6.28781515978109),(0.,1.0046298526015),
 .UNSPECIFIED.)
GEOMETRIC_REPRESENTATION_ITEM()
RATIONAL_B_SPLINE_SURFACE(((1.,0.714973861746018,1.00263925801538),(1.,
0.715074570648746,1.00263832548063),(1.,0.715175346804518,1.00263739232314),
(1.,0.715373133063441,1.00263556088069),(1.,0.715470137010246,1.00263466265274),
(1.,0.715656610457241,1.00263293596359),(1.,0.715746075245491,1.00263210754602),
(1.,0.715914001220182,1.002630552601),(1.,0.715992458218512,1.00262982611233),
(1.,0.716135329629182,1.00262850316518),(1.,0.71619974050175,1.00262790673949),
(1.,0.716312026959498,1.00262686699999),(1.,0.716359899784788,1.00262642371174),
(1.,0.716437258640867,1.00262570739154),(1.,0.716466742752961,1.00262543437735),
(1.,0.716506646263553,1.00262506488261),(1.,0.716516601622776,1.00262497269892),
(1.,0.716516123902598,1.00262497712247)))
REPRESENTATION_ITEM('')
SURFACE()
);
#757=(
BOUNDED_SURFACE()
B_SPLINE_SURFACE(3,2,((#165123,#165124,#165125),(#165126,#165127,#165128),
(#165129,#165130,#165131),(#165132,#165133,#165134),(#165135,#165136,#165137),
(#165138,#165139,#165140),(#165141,#165142,#165143),(#165144,#165145,#165146),
(#165147,#165148,#165149),(#165150,#165151,#165152),(#165153,#165154,#165155),
(#165156,#165157,#165158),(#165159,#165160,#165161),(#165162,#165163,#165164),
(#165165,#165166,#165167),(#165168,#165169,#165170),(#165171,#165172,#165173),
(#165174,#165175,#165176)),.UNSPECIFIED.,.F.,.F.,.F.)
B_SPLINE_SURFACE_WITH_KNOTS((4,2,2,2,2,2,2,2,4),(3,3),(-0.00462985261013508,
0.197550098471654,0.395100196943307,0.592650295414961,0.790200393886615,
0.987750492358268,1.18530059082992,1.38285068930158,1.58040078777323),(0.,
1.00462985261014),.UNSPECIFIED.)
GEOMETRIC_REPRESENTATION_ITEM()
RATIONAL_B_SPLINE_SURFACE(((1.,0.716516123900144,1.00262497712738),(1.,
0.716516601620842,1.00262497270383),(1.,0.716506646250414,1.00262506488763),
(1.,0.716466742760981,1.00262543438218),(1.,0.716437258633571,1.00262570739651),
(1.,0.716359899787203,1.00262642371662),(1.,0.71631202696154,1.00262686700487),
(1.,0.716199740494825,1.00262790674445),(1.,0.716135329626742,1.00262850317011),
(1.,0.715992458216071,1.00262982611725),(1.,0.715914001218864,1.00263055260592),
(1.,0.715746075241928,1.00263210755096),(1.,0.715656610445084,1.00263293596861),
(1.,0.715470137017513,1.00263466265758),(1.,0.715373133066229,1.00263556088558),
(1.,0.715175346796848,1.00263739232813),(1.,0.715074570650221,1.00263832548554),
(1.,0.714973861743568,1.00263925802033)))
REPRESENTATION_ITEM('')
SURFACE()
);
#758=(
BOUNDED_SURFACE()
B_SPLINE_SURFACE(3,2,((#165177,#165178,#165179),(#165180,#165181,#165182),
(#165183,#165184,#165185),(#165186,#165187,#165188),(#165189,#165190,#165191),
(#165192,#165193,#165194),(#165195,#165196,#165197),(#165198,#165199,#165200),
(#165201,#165202,#165203),(#165204,#165205,#165206),(#165207,#165208,#165209),
(#165210,#165211,#165212),(#165213,#165214,#165215),(#165216,#165217,#165218),
(#165219,#165220,#165221),(#165222,#165223,#165224),(#165225,#165226,#165227),
(#165228,#165229,#165230)),.UNSPECIFIED.,.F.,.F.,.F.)
B_SPLINE_SURFACE_WITH_KNOTS((4,2,2,2,2,2,2,2,4),(3,3),(-0.00462985261013591,
0.197550098471654,0.395100196943307,0.592650295414961,0.790200393886615,
0.987750492358268,1.18530059082992,1.38285068930158,1.58040078777323),(0.,
1.00462985261014),.UNSPECIFIED.)
GEOMETRIC_REPRESENTATION_ITEM()
RATIONAL_B_SPLINE_SURFACE(((1.,0.716516123900143,1.00262497712738),(1.,
0.716516601620842,1.00262497270383),(1.,0.716506646250414,1.00262506488763),
(1.,0.716466742760981,1.00262543438218),(1.,0.716437258633571,1.00262570739651),
(1.,0.716359899787203,1.00262642371662),(1.,0.71631202696154,1.00262686700487),
(1.,0.716199740494825,1.00262790674445),(1.,0.716135329626742,1.00262850317011),
(1.,0.715992458216071,1.00262982611725),(1.,0.715914001218863,1.00263055260592),
(1.,0.715746075241928,1.00263210755097),(1.,0.715656610445083,1.00263293596861),
(1.,0.715470137017513,1.00263466265758),(1.,0.715373133066228,1.00263556088558),
(1.,0.715175346796848,1.00263739232813),(1.,0.71507457065022,1.00263832548554),
(1.,0.714973861743568,1.00263925802033)))
REPRESENTATION_ITEM('')
SURFACE()
);
#759=(
BOUNDED_SURFACE()
B_SPLINE_SURFACE(1,2,((#177661,#177662,#177663,#177664,#177665,#177666,
#177667,#177668,#177669,#177670,#177671,#177672,#177673,#177674,#177675,
#177676,#177677,#177678,#177679,#177680,#177681,#177682,#177683,#177684,
#177685,#177686,#177687,#177688,#177689,#177690,#177691,#177692,#177693,
#177694,#177695,#177696,#177697,#177698,#177699,#177700,#177701,#177702,
#177703,#177704,#177705,#177706,#177707,#177708,#177709,#177710,#177711,
#177712,#177713,#177714,#177715,#177716,#177717,#177718,#177719,#177720,
#177721,#177722,#177723,#177724,#177725,#177726,#177727,#177728,#177729,
#177730,#177731,#177732,#177733,#177734,#177735,#177736,#177737,#177738,
#177739,#177740,#177741,#177742,#177743,#177744,#177745,#177746,#177747,
#177748,#177749,#177750,#177751,#177752,#177753,#177754,#177755,#177756,
#177757,#177758,#177759,#177760,#177761,#177762,#177763,#177764,#177765,
#177766,#177767,#177768,#177769,#177770,#177771,#177772,#177773,#177774,
#177775,#177776,#177777,#177778,#177779,#177780,#177781,#177782,#177783,
#177784,#177785,#177786,#177787,#177788,#177789,#177790,#177791,#177792,
#177793,#177794,#177795,#177796,#177797,#177798,#177799,#177800,#177801,
#177802,#177803,#177804,#177805,#177806,#177807,#177808,#177809,#177810,
#177811,#177812,#177813,#177814,#177815,#177816,#177817,#177818,#177819,
#177820,#177821,#177822,#177823,#177824,#177825,#177826,#177827,#177828,
#177829,#177830,#177831,#177832,#177833,#177834,#177835,#177836,#177837,
#177838,#177839,#177840,#177841,#177842,#177843,#177844,#177845,#177846,
#177847,#177848,#177849,#177850,#177851,#177852,#177853,#177854,#177855,
#177856,#177857,#177858,#177859,#177860,#177861,#177862,#177863,#177864,
#177865,#177866,#177867,#177868,#177869,#177870,#177871,#177872,#177873,
#177874,#177875,#177876,#177877,#177878,#177879,#177880,#177881,#177882,
#177883,#177884,#177885,#177886,#177887,#177888,#177889,#177890,#177891,
#177892,#177893,#177894,#177895,#177896,#177897,#177898,#177899,#177900,
#177901,#177902,#177903),(#177904,#177905,#177906,#177907,#177908,#177909,
#177910,#177911,#177912,#177913,#177914,#177915,#177916,#177917,#177918,
#177919,#177920,#177921,#177922,#177923,#177924,#177925,#177926,#177927,
#177928,#177929,#177930,#177931,#177932,#177933,#177934,#177935,#177936,
#177937,#177938,#177939,#177940,#177941,#177942,#177943,#177944,#177945,
#177946,#177947,#177948,#177949,#177950,#177951,#177952,#177953,#177954,
#177955,#177956,#177957,#177958,#177959,#177960,#177961,#177962,#177963,
#177964,#177965,#177966,#177967,#177968,#177969,#177970,#177971,#177972,
#177973,#177974,#177975,#177976,#177977,#177978,#177979,#177980,#177981,
#177982,#177983,#177984,#177985,#177986,#177987,#177988,#177989,#177990,
#177991,#177992,#177993,#177994,#177995,#177996,#177997,#177998,#177999,
#178000,#178001,#178002,#178003,#178004,#178005,#178006,#178007,#178008,
#178009,#178010,#178011,#178012,#178013,#178014,#178015,#178016,#178017,
#178018,#178019,#178020,#178021,#178022,#178023,#178024,#178025,#178026,
#178027,#178028,#178029,#178030,#178031,#178032,#178033,#178034,#178035,
#178036,#178037,#178038,#178039,#178040,#178041,#178042,#178043,#178044,
#178045,#178046,#178047,#178048,#178049,#178050,#178051,#178052,#178053,
#178054,#178055,#178056,#178057,#178058,#178059,#178060,#178061,#178062,
#178063,#178064,#178065,#178066,#178067,#178068,#178069,#178070,#178071,
#178072,#178073,#178074,#178075,#178076,#178077,#178078,#178079,#178080,
#178081,#178082,#178083,#178084,#178085,#178086,#178087,#178088,#178089,
#178090,#178091,#178092,#178093,#178094,#178095,#178096,#178097,#178098,
#178099,#178100,#178101,#178102,#178103,#178104,#178105,#178106,#178107,
#178108,#178109,#178110,#178111,#178112,#178113,#178114,#178115,#178116,
#178117,#178118,#178119,#178120,#178121,#178122,#178123,#178124,#178125,
#178126,#178127,#178128,#178129,#178130,#178131,#178132,#178133,#178134,
#178135,#178136,#178137,#178138,#178139,#178140,#178141,#178142,#178143,
#178144,#178145,#178146)),.UNSPECIFIED.,.F.,.F.,.F.)
B_SPLINE_SURFACE_WITH_KNOTS((2,2),(3,2,2,2,2,2,2,2,2,2,2,2,2,2,2,2,2,2,
2,2,2,2,2,2,2,2,2,2,2,2,2,2,2,2,2,2,2,2,2,2,2,2,2,2,2,2,2,2,2,2,2,2,2,2,
2,2,2,2,2,2,2,2,2,2,2,2,2,2,2,2,2,2,2,2,2,2,2,2,2,2,2,2,2,2,2,2,2,2,2,2,
2,2,2,2,2,2,2,2,2,2,2,2,2,2,2,2,2,2,2,2,2,2,2,2,2,2,2,2,2,2,2,3),(0.,1.),
(0.,0.0078125,0.015625,0.0234375,0.03125,0.0390625,0.046875,0.0546875,0.0625,
0.0703125,0.078125,0.0859375,0.09375,0.1015625,0.109375,0.1171875,0.125,
0.1328125,0.140625,0.1484375,0.15625,0.1640625,0.171875,0.1796875,0.1875,
0.1953125,0.203125,0.2109375,0.21875,0.2265625,0.234375,0.2421875,0.25,
0.2578125,0.265625,0.2734375,0.28125,0.2890625,0.296875,0.3046875,0.3125,
0.3203125,0.328125,0.3359375,0.34375,0.3515625,0.359375,0.3671875,0.375,
0.3828125,0.390625,0.3984375,0.40625,0.4140625,0.421875,0.4296875,0.4375,
0.4453125,0.453125,0.4609375,0.46875,0.4765625,0.484375,0.4921875,0.5,0.5078125,
0.515625,0.5234375,0.53125,0.5390625,0.546875,0.5546875,0.5625,0.5703125,
0.578125,0.5859375,0.59375,0.6015625,0.609375,0.6171875,0.625,0.6328125,
0.640625,0.6484375,0.65625,0.6640625,0.671875,0.6796875,0.6875,0.6953125,
0.703125,0.7109375,0.71875,0.7265625,0.734375,0.7421875,0.75,0.7578125,
0.765625,0.7734375,0.78125,0.7890625,0.796875,0.8046875,0.8125,0.8203125,
0.828125,0.8359375,0.84375,0.8515625,0.859375,0.8671875,0.875,0.8828125,
0.890625,0.8984375,0.90625,0.9140625,0.921875,0.9296875,0.9375,0.944992787595834),
 .UNSPECIFIED.)
GEOMETRIC_REPRESENTATION_ITEM()
RATIONAL_B_SPLINE_SURFACE(((1.,0.923879532511287,1.,0.923879532511287,1.,
0.923879532511287,1.,0.923879532511287,1.,0.923879532511287,1.,0.923879532511287,
1.,0.923879532511287,1.,0.923879532511287,1.,0.923879532511287,1.,0.923879532511287,
1.,0.923879532511287,1.,0.923879532511287,1.,0.923879532511287,1.,0.923879532511287,
1.,0.923879532511287,1.,0.923879532511287,1.,0.923879532511287,1.,0.923879532511287,
1.,0.923879532511287,1.,0.923879532511287,1.,0.923879532511287,1.,0.923879532511287,
1.,0.923879532511287,1.,0.923879532511287,1.,0.923879532511287,1.,0.923879532511287,
1.,0.923879532511287,1.,0.923879532511287,1.,0.923879532511287,1.,0.923879532511287,
1.,0.923879532511287,1.,0.923879532511287,1.,0.923879532511287,1.,0.923879532511287,
1.,0.923879532511287,1.,0.923879532511287,1.,0.923879532511287,1.,0.923879532511287,
1.,0.923879532511287,1.,0.923879532511287,1.,0.923879532511287,1.,0.923879532511287,
1.,0.923879532511287,1.,0.923879532511287,1.,0.923879532511287,1.,0.923879532511287,
1.,0.923879532511287,1.,0.923879532511287,1.,0.923879532511287,1.,0.923879532511287,
1.,0.923879532511287,1.,0.923879532511287,1.,0.923879532511287,1.,0.923879532511287,
1.,0.923879532511287,1.,0.923879532511287,1.,0.923879532511287,1.,0.923879532511287,
1.,0.923879532511287,1.,0.923879532511287,1.,0.923879532511287,1.,0.923879532511287,
1.,0.923879532511287,1.,0.923879532511287,1.,0.923879532511287,1.,0.923879532511287,
1.,0.923879532511287,1.,0.923879532511287,1.,0.923879532511287,1.,0.923879532511287,
1.,0.923879532511287,1.,0.923879532511287,1.,0.923879532511287,1.,0.923879532511287,
1.,0.923879532511287,1.,0.923879532511287,1.,0.923879532511287,1.,0.923879532511287,
1.,0.923879532511287,1.,0.923879532511287,1.,0.923879532511287,1.,0.923879532511287,
1.,0.923879532511287,1.,0.923879532511287,1.,0.923879532511287,1.,0.923879532511287,
1.,0.923879532511287,1.,0.923879532511287,1.,0.923879532511287,1.,0.923879532511287,
1.,0.923879532511287,1.,0.923879532511287,1.,0.923879532511287,1.,0.923879532511287,
1.,0.923879532511287,1.,0.923879532511287,1.,0.923879532511287,1.,0.923879532511287,
1.,0.923879532511287,1.,0.923879532511287,1.,0.923879532511287,1.,0.923879532511287,
1.,0.923879532511287,1.,0.923879532511287,1.,0.923879532511287,1.,0.923879532511287,
1.,0.923879532511287,1.,0.923879532511287,1.,0.923879532511287,1.,0.923879532511287,
1.,0.923879532511287,1.,0.923879532511287,1.,0.923879532511287,1.,0.923879532511287,
1.,0.923879532511287,1.,0.923879532511287,1.,0.923879532511287,1.,0.923879532511287,
1.,0.923879532511287,1.,0.923879532511287,1.,0.926994624692665,0.994024774641533),
(1.,0.923879532511287,1.,0.923879532511287,1.,0.923879532511287,1.,0.923879532511287,
1.,0.923879532511287,1.,0.923879532511287,1.,0.923879532511287,1.,0.923879532511287,
1.,0.923879532511287,1.,0.923879532511287,1.,0.923879532511287,1.,0.923879532511287,
1.,0.923879532511287,1.,0.923879532511287,1.,0.923879532511287,1.,0.923879532511287,
1.,0.923879532511287,1.,0.923879532511287,1.,0.923879532511287,1.,0.923879532511287,
1.,0.923879532511287,1.,0.923879532511287,1.,0.923879532511287,1.,0.923879532511287,
1.,0.923879532511287,1.,0.923879532511287,1.,0.923879532511287,1.,0.923879532511287,
1.,0.923879532511287,1.,0.923879532511287,1.,0.923879532511287,1.,0.923879532511287,
1.,0.923879532511287,1.,0.923879532511287,1.,0.923879532511287,1.,0.923879532511287,
1.,0.923879532511287,1.,0.923879532511287,1.,0.923879532511287,1.,0.923879532511287,
1.,0.923879532511287,1.,0.923879532511287,1.,0.923879532511287,1.,0.923879532511287,
1.,0.923879532511287,1.,0.923879532511287,1.,0.923879532511287,1.,0.923879532511287,
1.,0.923879532511287,1.,0.923879532511287,1.,0.923879532511287,1.,0.923879532511287,
1.,0.923879532511287,1.,0.923879532511287,1.,0.923879532511287,1.,0.923879532511287,
1.,0.923879532511287,1.,0.923879532511287,1.,0.923879532511287,1.,0.923879532511287,
1.,0.923879532511287,1.,0.923879532511287,1.,0.923879532511287,1.,0.923879532511287,
1.,0.923879532511287,1.,0.923879532511287,1.,0.923879532511287,1.,0.923879532511287,
1.,0.923879532511287,1.,0.923879532511287,1.,0.923879532511287,1.,0.923879532511287,
1.,0.923879532511287,1.,0.923879532511287,1.,0.923879532511287,1.,0.923879532511287,
1.,0.923879532511287,1.,0.923879532511287,1.,0.923879532511287,1.,0.923879532511287,
1.,0.923879532511287,1.,0.923879532511287,1.,0.923879532511287,1.,0.923879532511287,
1.,0.923879532511287,1.,0.923879532511287,1.,0.923879532511287,1.,0.923879532511287,
1.,0.923879532511287,1.,0.923879532511287,1.,0.923879532511287,1.,0.923879532511287,
1.,0.923879532511287,1.,0.923879532511287,1.,0.923879532511287,1.,0.923879532511287,
1.,0.923879532511287,1.,0.923879532511287,1.,0.923879532511287,1.,0.923879532511287,
1.,0.923879532511287,1.,0.923879532511287,1.,0.923879532511287,1.,0.923879532511287,
1.,0.923879532511287,1.,0.923879532511287,1.,0.923879532511287,1.,0.923879532511287,
1.,0.923879532511287,1.,0.923879532511287,1.,0.923879532511287,1.,0.923879532511287,
1.,0.923879532511287,1.,0.923879532511287,1.,0.923879532511287,1.,0.923879532511287,
1.,0.923879532511287,1.,0.923879532511287,1.,0.923879532511287,1.,0.923879532511287,
1.,0.926994624692665,0.994024774641533)))
REPRESENTATION_ITEM('')
SURFACE()
);
#760=(
BOUNDED_SURFACE()
B_SPLINE_SURFACE(1,2,((#178166,#178167,#178168,#178169,#178170,#178171,
#178172,#178173,#178174,#178175,#178176,#178177,#178178,#178179,#178180,
#178181,#178182,#178183,#178184,#178185,#178186,#178187,#178188,#178189,
#178190,#178191,#178192,#178193,#178194,#178195,#178196,#178197,#178198,
#178199,#178200,#178201,#178202,#178203,#178204,#178205,#178206,#178207,
#178208,#178209,#178210,#178211,#178212,#178213,#178214,#178215,#178216,
#178217,#178218,#178219,#178220,#178221,#178222,#178223,#178224,#178225,
#178226,#178227,#178228,#178229,#178230,#178231,#178232,#178233,#178234,
#178235,#178236,#178237,#178238,#178239,#178240,#178241,#178242,#178243,
#178244,#178245,#178246,#178247,#178248,#178249,#178250,#178251,#178252,
#178253,#178254,#178255,#178256,#178257,#178258,#178259,#178260,#178261,
#178262,#178263,#178264,#178265,#178266,#178267,#178268,#178269,#178270,
#178271,#178272,#178273,#178274,#178275,#178276,#178277,#178278,#178279,
#178280,#178281,#178282,#178283,#178284,#178285,#178286,#178287,#178288,
#178289,#178290,#178291,#178292,#178293,#178294,#178295,#178296,#178297,
#178298,#178299,#178300,#178301,#178302,#178303,#178304,#178305,#178306,
#178307,#178308,#178309,#178310,#178311,#178312,#178313,#178314,#178315,
#178316,#178317,#178318,#178319,#178320,#178321,#178322,#178323,#178324,
#178325,#178326,#178327,#178328,#178329,#178330,#178331,#178332,#178333,
#178334,#178335,#178336,#178337,#178338,#178339,#178340,#178341,#178342,
#178343,#178344,#178345,#178346,#178347,#178348,#178349,#178350,#178351,
#178352,#178353,#178354,#178355,#178356,#178357,#178358,#178359,#178360,
#178361,#178362,#178363,#178364,#178365,#178366,#178367,#178368,#178369,
#178370,#178371,#178372,#178373,#178374,#178375,#178376,#178377,#178378,
#178379,#178380,#178381,#178382,#178383,#178384,#178385,#178386,#178387,
#178388,#178389,#178390,#178391,#178392,#178393,#178394,#178395,#178396,
#178397,#178398,#178399,#178400,#178401,#178402,#178403,#178404,#178405,
#178406,#178407,#178408),(#178409,#178410,#178411,#178412,#178413,#178414,
#178415,#178416,#178417,#178418,#178419,#178420,#178421,#178422,#178423,
#178424,#178425,#178426,#178427,#178428,#178429,#178430,#178431,#178432,
#178433,#178434,#178435,#178436,#178437,#178438,#178439,#178440,#178441,
#178442,#178443,#178444,#178445,#178446,#178447,#178448,#178449,#178450,
#178451,#178452,#178453,#178454,#178455,#178456,#178457,#178458,#178459,
#178460,#178461,#178462,#178463,#178464,#178465,#178466,#178467,#178468,
#178469,#178470,#178471,#178472,#178473,#178474,#178475,#178476,#178477,
#178478,#178479,#178480,#178481,#178482,#178483,#178484,#178485,#178486,
#178487,#178488,#178489,#178490,#178491,#178492,#178493,#178494,#178495,
#178496,#178497,#178498,#178499,#178500,#178501,#178502,#178503,#178504,
#178505,#178506,#178507,#178508,#178509,#178510,#178511,#178512,#178513,
#178514,#178515,#178516,#178517,#178518,#178519,#178520,#178521,#178522,
#178523,#178524,#178525,#178526,#178527,#178528,#178529,#178530,#178531,
#178532,#178533,#178534,#178535,#178536,#178537,#178538,#178539,#178540,
#178541,#178542,#178543,#178544,#178545,#178546,#178547,#178548,#178549,
#178550,#178551,#178552,#178553,#178554,#178555,#178556,#178557,#178558,
#178559,#178560,#178561,#178562,#178563,#178564,#178565,#178566,#178567,
#178568,#178569,#178570,#178571,#178572,#178573,#178574,#178575,#178576,
#178577,#178578,#178579,#178580,#178581,#178582,#178583,#178584,#178585,
#178586,#178587,#178588,#178589,#178590,#178591,#178592,#178593,#178594,
#178595,#178596,#178597,#178598,#178599,#178600,#178601,#178602,#178603,
#178604,#178605,#178606,#178607,#178608,#178609,#178610,#178611,#178612,
#178613,#178614,#178615,#178616,#178617,#178618,#178619,#178620,#178621,
#178622,#178623,#178624,#178625,#178626,#178627,#178628,#178629,#178630,
#178631,#178632,#178633,#178634,#178635,#178636,#178637,#178638,#178639,
#178640,#178641,#178642,#178643,#178644,#178645,#178646,#178647,#178648,
#178649,#178650,#178651)),.UNSPECIFIED.,.F.,.F.,.F.)
B_SPLINE_SURFACE_WITH_KNOTS((2,2),(3,2,2,2,2,2,2,2,2,2,2,2,2,2,2,2,2,2,
2,2,2,2,2,2,2,2,2,2,2,2,2,2,2,2,2,2,2,2,2,2,2,2,2,2,2,2,2,2,2,2,2,2,2,2,
2,2,2,2,2,2,2,2,2,2,2,2,2,2,2,2,2,2,2,2,2,2,2,2,2,2,2,2,2,2,2,2,2,2,2,2,
2,2,2,2,2,2,2,2,2,2,2,2,2,2,2,2,2,2,2,2,2,2,2,2,2,2,2,2,2,2,2,3),(0.,1.),
(0.,0.0078125,0.015625,0.0234375,0.03125,0.0390625,0.046875,0.0546875,0.0625,
0.0703125,0.078125,0.0859375,0.09375,0.1015625,0.109375,0.1171875,0.125,
0.1328125,0.140625,0.1484375,0.15625,0.1640625,0.171875,0.1796875,0.1875,
0.1953125,0.203125,0.2109375,0.21875,0.2265625,0.234375,0.2421875,0.25,
0.2578125,0.265625,0.2734375,0.28125,0.2890625,0.296875,0.3046875,0.3125,
0.3203125,0.328125,0.3359375,0.34375,0.3515625,0.359375,0.3671875,0.375,
0.3828125,0.390625,0.3984375,0.40625,0.4140625,0.421875,0.4296875,0.4375,
0.4453125,0.453125,0.4609375,0.46875,0.4765625,0.484375,0.4921875,0.5,0.5078125,
0.515625,0.5234375,0.53125,0.5390625,0.546875,0.5546875,0.5625,0.5703125,
0.578125,0.5859375,0.59375,0.6015625,0.609375,0.6171875,0.625,0.6328125,
0.640625,0.6484375,0.65625,0.6640625,0.671875,0.6796875,0.6875,0.6953125,
0.703125,0.7109375,0.71875,0.7265625,0.734375,0.7421875,0.75,0.7578125,
0.765625,0.7734375,0.78125,0.7890625,0.796875,0.8046875,0.8125,0.8203125,
0.828125,0.8359375,0.84375,0.8515625,0.859375,0.8671875,0.875,0.8828125,
0.890625,0.8984375,0.90625,0.9140625,0.921875,0.9296875,0.9375,0.944992787595834),
 .UNSPECIFIED.)
GEOMETRIC_REPRESENTATION_ITEM()
RATIONAL_B_SPLINE_SURFACE(((1.,0.923879532511287,1.,0.923879532511287,1.,
0.923879532511287,1.,0.923879532511287,1.,0.923879532511287,1.,0.923879532511287,
1.,0.923879532511287,1.,0.923879532511287,1.,0.923879532511287,1.,0.923879532511287,
1.,0.923879532511287,1.,0.923879532511287,1.,0.923879532511287,1.,0.923879532511287,
1.,0.923879532511287,1.,0.923879532511287,1.,0.923879532511287,1.,0.923879532511287,
1.,0.923879532511287,1.,0.923879532511287,1.,0.923879532511287,1.,0.923879532511287,
1.,0.923879532511287,1.,0.923879532511287,1.,0.923879532511287,1.,0.923879532511287,
1.,0.923879532511287,1.,0.923879532511287,1.,0.923879532511287,1.,0.923879532511287,
1.,0.923879532511287,1.,0.923879532511287,1.,0.923879532511287,1.,0.923879532511287,
1.,0.923879532511287,1.,0.923879532511287,1.,0.923879532511287,1.,0.923879532511287,
1.,0.923879532511287,1.,0.923879532511287,1.,0.923879532511287,1.,0.923879532511287,
1.,0.923879532511287,1.,0.923879532511287,1.,0.923879532511287,1.,0.923879532511287,
1.,0.923879532511287,1.,0.923879532511287,1.,0.923879532511287,1.,0.923879532511287,
1.,0.923879532511287,1.,0.923879532511287,1.,0.923879532511287,1.,0.923879532511287,
1.,0.923879532511287,1.,0.923879532511287,1.,0.923879532511287,1.,0.923879532511287,
1.,0.923879532511287,1.,0.923879532511287,1.,0.923879532511287,1.,0.923879532511287,
1.,0.923879532511287,1.,0.923879532511287,1.,0.923879532511287,1.,0.923879532511287,
1.,0.923879532511287,1.,0.923879532511287,1.,0.923879532511287,1.,0.923879532511287,
1.,0.923879532511287,1.,0.923879532511287,1.,0.923879532511287,1.,0.923879532511287,
1.,0.923879532511287,1.,0.923879532511287,1.,0.923879532511287,1.,0.923879532511287,
1.,0.923879532511287,1.,0.923879532511287,1.,0.923879532511287,1.,0.923879532511287,
1.,0.923879532511287,1.,0.923879532511287,1.,0.923879532511287,1.,0.923879532511287,
1.,0.923879532511287,1.,0.923879532511287,1.,0.923879532511287,1.,0.923879532511287,
1.,0.923879532511287,1.,0.923879532511287,1.,0.923879532511287,1.,0.923879532511287,
1.,0.923879532511287,1.,0.923879532511287,1.,0.923879532511287,1.,0.923879532511287,
1.,0.923879532511287,1.,0.923879532511287,1.,0.923879532511287,1.,0.923879532511287,
1.,0.923879532511287,1.,0.923879532511287,1.,0.923879532511287,1.,0.923879532511287,
1.,0.923879532511287,1.,0.923879532511287,1.,0.923879532511287,1.,0.923879532511287,
1.,0.923879532511287,1.,0.923879532511287,1.,0.923879532511287,1.,0.923879532511287,
1.,0.923879532511287,1.,0.923879532511287,1.,0.923879532511287,1.,0.923879532511287,
1.,0.923879532511287,1.,0.923879532511287,1.,0.926994624692665,0.994024774641533),
(1.,0.923879532511287,1.,0.923879532511287,1.,0.923879532511287,1.,0.923879532511287,
1.,0.923879532511287,1.,0.923879532511287,1.,0.923879532511287,1.,0.923879532511287,
1.,0.923879532511287,1.,0.923879532511287,1.,0.923879532511287,1.,0.923879532511287,
1.,0.923879532511287,1.,0.923879532511287,1.,0.923879532511287,1.,0.923879532511287,
1.,0.923879532511287,1.,0.923879532511287,1.,0.923879532511287,1.,0.923879532511287,
1.,0.923879532511287,1.,0.923879532511287,1.,0.923879532511287,1.,0.923879532511287,
1.,0.923879532511287,1.,0.923879532511287,1.,0.923879532511287,1.,0.923879532511287,
1.,0.923879532511287,1.,0.923879532511287,1.,0.923879532511287,1.,0.923879532511287,
1.,0.923879532511287,1.,0.923879532511287,1.,0.923879532511287,1.,0.923879532511287,
1.,0.923879532511287,1.,0.923879532511287,1.,0.923879532511287,1.,0.923879532511287,
1.,0.923879532511287,1.,0.923879532511287,1.,0.923879532511287,1.,0.923879532511287,
1.,0.923879532511287,1.,0.923879532511287,1.,0.923879532511287,1.,0.923879532511287,
1.,0.923879532511287,1.,0.923879532511287,1.,0.923879532511287,1.,0.923879532511287,
1.,0.923879532511287,1.,0.923879532511287,1.,0.923879532511287,1.,0.923879532511287,
1.,0.923879532511287,1.,0.923879532511287,1.,0.923879532511287,1.,0.923879532511287,
1.,0.923879532511287,1.,0.923879532511287,1.,0.923879532511287,1.,0.923879532511287,
1.,0.923879532511287,1.,0.923879532511287,1.,0.923879532511287,1.,0.923879532511287,
1.,0.923879532511287,1.,0.923879532511287,1.,0.923879532511287,1.,0.923879532511287,
1.,0.923879532511287,1.,0.923879532511287,1.,0.923879532511287,1.,0.923879532511287,
1.,0.923879532511287,1.,0.923879532511287,1.,0.923879532511287,1.,0.923879532511287,
1.,0.923879532511287,1.,0.923879532511287,1.,0.923879532511287,1.,0.923879532511287,
1.,0.923879532511287,1.,0.923879532511287,1.,0.923879532511287,1.,0.923879532511287,
1.,0.923879532511287,1.,0.923879532511287,1.,0.923879532511287,1.,0.923879532511287,
1.,0.923879532511287,1.,0.923879532511287,1.,0.923879532511287,1.,0.923879532511287,
1.,0.923879532511287,1.,0.923879532511287,1.,0.923879532511287,1.,0.923879532511287,
1.,0.923879532511287,1.,0.923879532511287,1.,0.923879532511287,1.,0.923879532511287,
1.,0.923879532511287,1.,0.923879532511287,1.,0.923879532511287,1.,0.923879532511287,
1.,0.923879532511287,1.,0.923879532511287,1.,0.923879532511287,1.,0.923879532511287,
1.,0.923879532511287,1.,0.923879532511287,1.,0.923879532511287,1.,0.923879532511287,
1.,0.923879532511287,1.,0.923879532511287,1.,0.923879532511287,1.,0.923879532511287,
1.,0.926994624692665,0.994024774641533)))
REPRESENTATION_ITEM('')
SURFACE()
);
#761=(
BOUNDED_SURFACE()
B_SPLINE_SURFACE(1,2,((#178671,#178672,#178673,#178674,#178675,#178676,
#178677,#178678,#178679,#178680,#178681,#178682,#178683,#178684,#178685,
#178686,#178687,#178688,#178689,#178690,#178691,#178692,#178693,#178694,
#178695,#178696,#178697,#178698,#178699,#178700,#178701,#178702,#178703,
#178704,#178705,#178706,#178707,#178708,#178709,#178710,#178711,#178712,
#178713,#178714,#178715,#178716,#178717,#178718,#178719,#178720,#178721,
#178722,#178723,#178724,#178725,#178726,#178727,#178728,#178729,#178730,
#178731,#178732,#178733,#178734,#178735,#178736,#178737,#178738,#178739,
#178740,#178741,#178742,#178743,#178744,#178745,#178746,#178747,#178748,
#178749,#178750,#178751,#178752,#178753,#178754,#178755,#178756,#178757,
#178758,#178759,#178760,#178761,#178762,#178763,#178764,#178765,#178766,
#178767,#178768,#178769,#178770,#178771,#178772,#178773,#178774,#178775,
#178776,#178777,#178778,#178779,#178780,#178781,#178782,#178783,#178784,
#178785,#178786,#178787,#178788,#178789,#178790,#178791,#178792,#178793,
#178794,#178795,#178796,#178797,#178798,#178799,#178800,#178801,#178802,
#178803,#178804,#178805,#178806,#178807,#178808,#178809,#178810,#178811,
#178812,#178813,#178814,#178815,#178816,#178817,#178818,#178819,#178820,
#178821,#178822,#178823,#178824,#178825,#178826,#178827,#178828,#178829,
#178830,#178831,#178832,#178833,#178834,#178835,#178836,#178837,#178838,
#178839,#178840,#178841,#178842,#178843,#178844,#178845,#178846,#178847,
#178848,#178849,#178850,#178851,#178852,#178853,#178854,#178855,#178856,
#178857,#178858,#178859,#178860,#178861,#178862,#178863,#178864,#178865,
#178866,#178867,#178868,#178869,#178870,#178871,#178872,#178873,#178874,
#178875,#178876,#178877,#178878,#178879,#178880,#178881,#178882,#178883,
#178884,#178885,#178886,#178887,#178888,#178889,#178890,#178891,#178892,
#178893,#178894,#178895,#178896,#178897,#178898,#178899,#178900,#178901,
#178902,#178903,#178904,#178905,#178906,#178907,#178908,#178909,#178910,
#178911,#178912,#178913),(#178914,#178915,#178916,#178917,#178918,#178919,
#178920,#178921,#178922,#178923,#178924,#178925,#178926,#178927,#178928,
#178929,#178930,#178931,#178932,#178933,#178934,#178935,#178936,#178937,
#178938,#178939,#178940,#178941,#178942,#178943,#178944,#178945,#178946,
#178947,#178948,#178949,#178950,#178951,#178952,#178953,#178954,#178955,
#178956,#178957,#178958,#178959,#178960,#178961,#178962,#178963,#178964,
#178965,#178966,#178967,#178968,#178969,#178970,#178971,#178972,#178973,
#178974,#178975,#178976,#178977,#178978,#178979,#178980,#178981,#178982,
#178983,#178984,#178985,#178986,#178987,#178988,#178989,#178990,#178991,
#178992,#178993,#178994,#178995,#178996,#178997,#178998,#178999,#179000,
#179001,#179002,#179003,#179004,#179005,#179006,#179007,#179008,#179009,
#179010,#179011,#179012,#179013,#179014,#179015,#179016,#179017,#179018,
#179019,#179020,#179021,#179022,#179023,#179024,#179025,#179026,#179027,
#179028,#179029,#179030,#179031,#179032,#179033,#179034,#179035,#179036,
#179037,#179038,#179039,#179040,#179041,#179042,#179043,#179044,#179045,
#179046,#179047,#179048,#179049,#179050,#179051,#179052,#179053,#179054,
#179055,#179056,#179057,#179058,#179059,#179060,#179061,#179062,#179063,
#179064,#179065,#179066,#179067,#179068,#179069,#179070,#179071,#179072,
#179073,#179074,#179075,#179076,#179077,#179078,#179079,#179080,#179081,
#179082,#179083,#179084,#179085,#179086,#179087,#179088,#179089,#179090,
#179091,#179092,#179093,#179094,#179095,#179096,#179097,#179098,#179099,
#179100,#179101,#179102,#179103,#179104,#179105,#179106,#179107,#179108,
#179109,#179110,#179111,#179112,#179113,#179114,#179115,#179116,#179117,
#179118,#179119,#179120,#179121,#179122,#179123,#179124,#179125,#179126,
#179127,#179128,#179129,#179130,#179131,#179132,#179133,#179134,#179135,
#179136,#179137,#179138,#179139,#179140,#179141,#179142,#179143,#179144,
#179145,#179146,#179147,#179148,#179149,#179150,#179151,#179152,#179153,
#179154,#179155,#179156)),.UNSPECIFIED.,.F.,.F.,.F.)
B_SPLINE_SURFACE_WITH_KNOTS((2,2),(3,2,2,2,2,2,2,2,2,2,2,2,2,2,2,2,2,2,
2,2,2,2,2,2,2,2,2,2,2,2,2,2,2,2,2,2,2,2,2,2,2,2,2,2,2,2,2,2,2,2,2,2,2,2,
2,2,2,2,2,2,2,2,2,2,2,2,2,2,2,2,2,2,2,2,2,2,2,2,2,2,2,2,2,2,2,2,2,2,2,2,
2,2,2,2,2,2,2,2,2,2,2,2,2,2,2,2,2,2,2,2,2,2,2,2,2,2,2,2,2,2,2,3),(0.,1.),
(0.,0.0078125,0.015625,0.0234375,0.03125,0.0390625,0.046875,0.0546875,0.0625,
0.0703125,0.078125,0.0859375,0.09375,0.1015625,0.109375,0.1171875,0.125,
0.1328125,0.140625,0.1484375,0.15625,0.1640625,0.171875,0.1796875,0.1875,
0.1953125,0.203125,0.2109375,0.21875,0.2265625,0.234375,0.2421875,0.25,
0.2578125,0.265625,0.2734375,0.28125,0.2890625,0.296875,0.3046875,0.3125,
0.3203125,0.328125,0.3359375,0.34375,0.3515625,0.359375,0.3671875,0.375,
0.3828125,0.390625,0.3984375,0.40625,0.4140625,0.421875,0.4296875,0.4375,
0.4453125,0.453125,0.4609375,0.46875,0.4765625,0.484375,0.4921875,0.5,0.5078125,
0.515625,0.5234375,0.53125,0.5390625,0.546875,0.5546875,0.5625,0.5703125,
0.578125,0.5859375,0.59375,0.6015625,0.609375,0.6171875,0.625,0.6328125,
0.640625,0.6484375,0.65625,0.6640625,0.671875,0.6796875,0.6875,0.6953125,
0.703125,0.7109375,0.71875,0.7265625,0.734375,0.7421875,0.75,0.7578125,
0.765625,0.7734375,0.78125,0.7890625,0.796875,0.8046875,0.8125,0.8203125,
0.828125,0.8359375,0.84375,0.8515625,0.859375,0.8671875,0.875,0.8828125,
0.890625,0.8984375,0.90625,0.9140625,0.921875,0.9296875,0.9375,0.944992787595834),
 .UNSPECIFIED.)
GEOMETRIC_REPRESENTATION_ITEM()
RATIONAL_B_SPLINE_SURFACE(((1.,0.923879532511287,1.,0.923879532511287,1.,
0.923879532511287,1.,0.923879532511287,1.,0.923879532511287,1.,0.923879532511287,
1.,0.923879532511287,1.,0.923879532511287,1.,0.923879532511287,1.,0.923879532511287,
1.,0.923879532511287,1.,0.923879532511287,1.,0.923879532511287,1.,0.923879532511287,
1.,0.923879532511287,1.,0.923879532511287,1.,0.923879532511287,1.,0.923879532511287,
1.,0.923879532511287,1.,0.923879532511287,1.,0.923879532511287,1.,0.923879532511287,
1.,0.923879532511287,1.,0.923879532511287,1.,0.923879532511287,1.,0.923879532511287,
1.,0.923879532511287,1.,0.923879532511287,1.,0.923879532511287,1.,0.923879532511287,
1.,0.923879532511287,1.,0.923879532511287,1.,0.923879532511287,1.,0.923879532511287,
1.,0.923879532511287,1.,0.923879532511287,1.,0.923879532511287,1.,0.923879532511287,
1.,0.923879532511287,1.,0.923879532511287,1.,0.923879532511287,1.,0.923879532511287,
1.,0.923879532511287,1.,0.923879532511287,1.,0.923879532511287,1.,0.923879532511287,
1.,0.923879532511287,1.,0.923879532511287,1.,0.923879532511287,1.,0.923879532511287,
1.,0.923879532511287,1.,0.923879532511287,1.,0.923879532511287,1.,0.923879532511287,
1.,0.923879532511287,1.,0.923879532511287,1.,0.923879532511287,1.,0.923879532511287,
1.,0.923879532511287,1.,0.923879532511287,1.,0.923879532511287,1.,0.923879532511287,
1.,0.923879532511287,1.,0.923879532511287,1.,0.923879532511287,1.,0.923879532511287,
1.,0.923879532511287,1.,0.923879532511287,1.,0.923879532511287,1.,0.923879532511287,
1.,0.923879532511287,1.,0.923879532511287,1.,0.923879532511287,1.,0.923879532511287,
1.,0.923879532511287,1.,0.923879532511287,1.,0.923879532511287,1.,0.923879532511287,
1.,0.923879532511287,1.,0.923879532511287,1.,0.923879532511287,1.,0.923879532511287,
1.,0.923879532511287,1.,0.923879532511287,1.,0.923879532511287,1.,0.923879532511287,
1.,0.923879532511287,1.,0.923879532511287,1.,0.923879532511287,1.,0.923879532511287,
1.,0.923879532511287,1.,0.923879532511287,1.,0.923879532511287,1.,0.923879532511287,
1.,0.923879532511287,1.,0.923879532511287,1.,0.923879532511287,1.,0.923879532511287,
1.,0.923879532511287,1.,0.923879532511287,1.,0.923879532511287,1.,0.923879532511287,
1.,0.923879532511287,1.,0.923879532511287,1.,0.923879532511287,1.,0.923879532511287,
1.,0.923879532511287,1.,0.923879532511287,1.,0.923879532511287,1.,0.923879532511287,
1.,0.923879532511287,1.,0.923879532511287,1.,0.923879532511287,1.,0.923879532511287,
1.,0.923879532511287,1.,0.923879532511287,1.,0.923879532511287,1.,0.923879532511287,
1.,0.923879532511287,1.,0.923879532511287,1.,0.926994624692665,0.994024774641533),
(1.,0.923879532511287,1.,0.923879532511287,1.,0.923879532511287,1.,0.923879532511287,
1.,0.923879532511287,1.,0.923879532511287,1.,0.923879532511287,1.,0.923879532511287,
1.,0.923879532511287,1.,0.923879532511287,1.,0.923879532511287,1.,0.923879532511287,
1.,0.923879532511287,1.,0.923879532511287,1.,0.923879532511287,1.,0.923879532511287,
1.,0.923879532511287,1.,0.923879532511287,1.,0.923879532511287,1.,0.923879532511287,
1.,0.923879532511287,1.,0.923879532511287,1.,0.923879532511287,1.,0.923879532511287,
1.,0.923879532511287,1.,0.923879532511287,1.,0.923879532511287,1.,0.923879532511287,
1.,0.923879532511287,1.,0.923879532511287,1.,0.923879532511287,1.,0.923879532511287,
1.,0.923879532511287,1.,0.923879532511287,1.,0.923879532511287,1.,0.923879532511287,
1.,0.923879532511287,1.,0.923879532511287,1.,0.923879532511287,1.,0.923879532511287,
1.,0.923879532511287,1.,0.923879532511287,1.,0.923879532511287,1.,0.923879532511287,
1.,0.923879532511287,1.,0.923879532511287,1.,0.923879532511287,1.,0.923879532511287,
1.,0.923879532511287,1.,0.923879532511287,1.,0.923879532511287,1.,0.923879532511287,
1.,0.923879532511287,1.,0.923879532511287,1.,0.923879532511287,1.,0.923879532511287,
1.,0.923879532511287,1.,0.923879532511287,1.,0.923879532511287,1.,0.923879532511287,
1.,0.923879532511287,1.,0.923879532511287,1.,0.923879532511287,1.,0.923879532511287,
1.,0.923879532511287,1.,0.923879532511287,1.,0.923879532511287,1.,0.923879532511287,
1.,0.923879532511287,1.,0.923879532511287,1.,0.923879532511287,1.,0.923879532511287,
1.,0.923879532511287,1.,0.923879532511287,1.,0.923879532511287,1.,0.923879532511287,
1.,0.923879532511287,1.,0.923879532511287,1.,0.923879532511287,1.,0.923879532511287,
1.,0.923879532511287,1.,0.923879532511287,1.,0.923879532511287,1.,0.923879532511287,
1.,0.923879532511287,1.,0.923879532511287,1.,0.923879532511287,1.,0.923879532511287,
1.,0.923879532511287,1.,0.923879532511287,1.,0.923879532511287,1.,0.923879532511287,
1.,0.923879532511287,1.,0.923879532511287,1.,0.923879532511287,1.,0.923879532511287,
1.,0.923879532511287,1.,0.923879532511287,1.,0.923879532511287,1.,0.923879532511287,
1.,0.923879532511287,1.,0.923879532511287,1.,0.923879532511287,1.,0.923879532511287,
1.,0.923879532511287,1.,0.923879532511287,1.,0.923879532511287,1.,0.923879532511287,
1.,0.923879532511287,1.,0.923879532511287,1.,0.923879532511287,1.,0.923879532511287,
1.,0.923879532511287,1.,0.923879532511287,1.,0.923879532511287,1.,0.923879532511287,
1.,0.923879532511287,1.,0.923879532511287,1.,0.923879532511287,1.,0.923879532511287,
1.,0.926994624692665,0.994024774641533)))
REPRESENTATION_ITEM('')
SURFACE()
);
#762=(
BOUNDED_SURFACE()
B_SPLINE_SURFACE(1,2,((#179176,#179177,#179178,#179179,#179180,#179181,
#179182,#179183,#179184,#179185,#179186,#179187,#179188,#179189,#179190,
#179191,#179192,#179193,#179194,#179195,#179196,#179197,#179198,#179199,
#179200,#179201,#179202,#179203,#179204,#179205,#179206,#179207,#179208,
#179209,#179210,#179211,#179212,#179213,#179214,#179215,#179216,#179217,
#179218,#179219,#179220,#179221,#179222,#179223,#179224,#179225,#179226,
#179227,#179228,#179229,#179230,#179231,#179232,#179233,#179234,#179235,
#179236,#179237,#179238,#179239,#179240,#179241,#179242,#179243,#179244,
#179245,#179246,#179247,#179248,#179249,#179250,#179251,#179252,#179253,
#179254,#179255,#179256,#179257,#179258,#179259,#179260,#179261,#179262,
#179263,#179264,#179265,#179266,#179267,#179268,#179269,#179270,#179271,
#179272,#179273,#179274,#179275,#179276,#179277,#179278,#179279,#179280,
#179281,#179282,#179283,#179284,#179285,#179286,#179287,#179288,#179289,
#179290,#179291,#179292,#179293,#179294,#179295,#179296,#179297,#179298,
#179299,#179300,#179301,#179302,#179303,#179304,#179305,#179306,#179307,
#179308,#179309,#179310,#179311,#179312,#179313,#179314,#179315,#179316,
#179317,#179318,#179319,#179320,#179321,#179322,#179323,#179324,#179325,
#179326,#179327,#179328,#179329,#179330,#179331,#179332,#179333,#179334,
#179335,#179336,#179337,#179338,#179339,#179340,#179341,#179342,#179343,
#179344,#179345,#179346,#179347,#179348,#179349,#179350,#179351,#179352,
#179353,#179354,#179355,#179356,#179357,#179358,#179359,#179360,#179361,
#179362,#179363,#179364,#179365,#179366,#179367,#179368,#179369,#179370,
#179371,#179372,#179373,#179374,#179375,#179376,#179377,#179378,#179379,
#179380,#179381,#179382,#179383,#179384,#179385,#179386,#179387,#179388,
#179389,#179390,#179391,#179392,#179393,#179394,#179395,#179396,#179397,
#179398,#179399,#179400,#179401,#179402,#179403,#179404,#179405,#179406,
#179407,#179408,#179409,#179410,#179411,#179412,#179413,#179414,#179415,
#179416,#179417,#179418),(#179419,#179420,#179421,#179422,#179423,#179424,
#179425,#179426,#179427,#179428,#179429,#179430,#179431,#179432,#179433,
#179434,#179435,#179436,#179437,#179438,#179439,#179440,#179441,#179442,
#179443,#179444,#179445,#179446,#179447,#179448,#179449,#179450,#179451,
#179452,#179453,#179454,#179455,#179456,#179457,#179458,#179459,#179460,
#179461,#179462,#179463,#179464,#179465,#179466,#179467,#179468,#179469,
#179470,#179471,#179472,#179473,#179474,#179475,#179476,#179477,#179478,
#179479,#179480,#179481,#179482,#179483,#179484,#179485,#179486,#179487,
#179488,#179489,#179490,#179491,#179492,#179493,#179494,#179495,#179496,
#179497,#179498,#179499,#179500,#179501,#179502,#179503,#179504,#179505,
#179506,#179507,#179508,#179509,#179510,#179511,#179512,#179513,#179514,
#179515,#179516,#179517,#179518,#179519,#179520,#179521,#179522,#179523,
#179524,#179525,#179526,#179527,#179528,#179529,#179530,#179531,#179532,
#179533,#179534,#179535,#179536,#179537,#179538,#179539,#179540,#179541,
#179542,#179543,#179544,#179545,#179546,#179547,#179548,#179549,#179550,
#179551,#179552,#179553,#179554,#179555,#179556,#179557,#179558,#179559,
#179560,#179561,#179562,#179563,#179564,#179565,#179566,#179567,#179568,
#179569,#179570,#179571,#179572,#179573,#179574,#179575,#179576,#179577,
#179578,#179579,#179580,#179581,#179582,#179583,#179584,#179585,#179586,
#179587,#179588,#179589,#179590,#179591,#179592,#179593,#179594,#179595,
#179596,#179597,#179598,#179599,#179600,#179601,#179602,#179603,#179604,
#179605,#179606,#179607,#179608,#179609,#179610,#179611,#179612,#179613,
#179614,#179615,#179616,#179617,#179618,#179619,#179620,#179621,#179622,
#179623,#179624,#179625,#179626,#179627,#179628,#179629,#179630,#179631,
#179632,#179633,#179634,#179635,#179636,#179637,#179638,#179639,#179640,
#179641,#179642,#179643,#179644,#179645,#179646,#179647,#179648,#179649,
#179650,#179651,#179652,#179653,#179654,#179655,#179656,#179657,#179658,
#179659,#179660,#179661)),.UNSPECIFIED.,.F.,.F.,.F.)
B_SPLINE_SURFACE_WITH_KNOTS((2,2),(3,2,2,2,2,2,2,2,2,2,2,2,2,2,2,2,2,2,
2,2,2,2,2,2,2,2,2,2,2,2,2,2,2,2,2,2,2,2,2,2,2,2,2,2,2,2,2,2,2,2,2,2,2,2,
2,2,2,2,2,2,2,2,2,2,2,2,2,2,2,2,2,2,2,2,2,2,2,2,2,2,2,2,2,2,2,2,2,2,2,2,
2,2,2,2,2,2,2,2,2,2,2,2,2,2,2,2,2,2,2,2,2,2,2,2,2,2,2,2,2,2,2,3),(0.,1.),
(0.,0.0078125,0.015625,0.0234375,0.03125,0.0390625,0.046875,0.0546875,0.0625,
0.0703125,0.078125,0.0859375,0.09375,0.1015625,0.109375,0.1171875,0.125,
0.1328125,0.140625,0.1484375,0.15625,0.1640625,0.171875,0.1796875,0.1875,
0.1953125,0.203125,0.2109375,0.21875,0.2265625,0.234375,0.2421875,0.25,
0.2578125,0.265625,0.2734375,0.28125,0.2890625,0.296875,0.3046875,0.3125,
0.3203125,0.328125,0.3359375,0.34375,0.3515625,0.359375,0.3671875,0.375,
0.3828125,0.390625,0.3984375,0.40625,0.4140625,0.421875,0.4296875,0.4375,
0.4453125,0.453125,0.4609375,0.46875,0.4765625,0.484375,0.4921875,0.5,0.5078125,
0.515625,0.5234375,0.53125,0.5390625,0.546875,0.5546875,0.5625,0.5703125,
0.578125,0.5859375,0.59375,0.6015625,0.609375,0.6171875,0.625,0.6328125,
0.640625,0.6484375,0.65625,0.6640625,0.671875,0.6796875,0.6875,0.6953125,
0.703125,0.7109375,0.71875,0.7265625,0.734375,0.7421875,0.75,0.7578125,
0.765625,0.7734375,0.78125,0.7890625,0.796875,0.8046875,0.8125,0.8203125,
0.828125,0.8359375,0.84375,0.8515625,0.859375,0.8671875,0.875,0.8828125,
0.890625,0.8984375,0.90625,0.9140625,0.921875,0.9296875,0.9375,0.944992787595834),
 .UNSPECIFIED.)
GEOMETRIC_REPRESENTATION_ITEM()
RATIONAL_B_SPLINE_SURFACE(((1.,0.923879532511287,1.,0.923879532511287,1.,
0.923879532511287,1.,0.923879532511287,1.,0.923879532511287,1.,0.923879532511287,
1.,0.923879532511287,1.,0.923879532511287,1.,0.923879532511287,1.,0.923879532511287,
1.,0.923879532511287,1.,0.923879532511287,1.,0.923879532511287,1.,0.923879532511287,
1.,0.923879532511287,1.,0.923879532511287,1.,0.923879532511287,1.,0.923879532511287,
1.,0.923879532511287,1.,0.923879532511287,1.,0.923879532511287,1.,0.923879532511287,
1.,0.923879532511287,1.,0.923879532511287,1.,0.923879532511287,1.,0.923879532511287,
1.,0.923879532511287,1.,0.923879532511287,1.,0.923879532511287,1.,0.923879532511287,
1.,0.923879532511287,1.,0.923879532511287,1.,0.923879532511287,1.,0.923879532511287,
1.,0.923879532511287,1.,0.923879532511287,1.,0.923879532511287,1.,0.923879532511287,
1.,0.923879532511287,1.,0.923879532511287,1.,0.923879532511287,1.,0.923879532511287,
1.,0.923879532511287,1.,0.923879532511287,1.,0.923879532511287,1.,0.923879532511287,
1.,0.923879532511287,1.,0.923879532511287,1.,0.923879532511287,1.,0.923879532511287,
1.,0.923879532511287,1.,0.923879532511287,1.,0.923879532511287,1.,0.923879532511287,
1.,0.923879532511287,1.,0.923879532511287,1.,0.923879532511287,1.,0.923879532511287,
1.,0.923879532511287,1.,0.923879532511287,1.,0.923879532511287,1.,0.923879532511287,
1.,0.923879532511287,1.,0.923879532511287,1.,0.923879532511287,1.,0.923879532511287,
1.,0.923879532511287,1.,0.923879532511287,1.,0.923879532511287,1.,0.923879532511287,
1.,0.923879532511287,1.,0.923879532511287,1.,0.923879532511287,1.,0.923879532511287,
1.,0.923879532511287,1.,0.923879532511287,1.,0.923879532511287,1.,0.923879532511287,
1.,0.923879532511287,1.,0.923879532511287,1.,0.923879532511287,1.,0.923879532511287,
1.,0.923879532511287,1.,0.923879532511287,1.,0.923879532511287,1.,0.923879532511287,
1.,0.923879532511287,1.,0.923879532511287,1.,0.923879532511287,1.,0.923879532511287,
1.,0.923879532511287,1.,0.923879532511287,1.,0.923879532511287,1.,0.923879532511287,
1.,0.923879532511287,1.,0.923879532511287,1.,0.923879532511287,1.,0.923879532511287,
1.,0.923879532511287,1.,0.923879532511287,1.,0.923879532511287,1.,0.923879532511287,
1.,0.923879532511287,1.,0.923879532511287,1.,0.923879532511287,1.,0.923879532511287,
1.,0.923879532511287,1.,0.923879532511287,1.,0.923879532511287,1.,0.923879532511287,
1.,0.923879532511287,1.,0.923879532511287,1.,0.923879532511287,1.,0.923879532511287,
1.,0.923879532511287,1.,0.923879532511287,1.,0.923879532511287,1.,0.923879532511287,
1.,0.923879532511287,1.,0.923879532511287,1.,0.926994624692665,0.994024774641533),
(1.,0.923879532511287,1.,0.923879532511287,1.,0.923879532511287,1.,0.923879532511287,
1.,0.923879532511287,1.,0.923879532511287,1.,0.923879532511287,1.,0.923879532511287,
1.,0.923879532511287,1.,0.923879532511287,1.,0.923879532511287,1.,0.923879532511287,
1.,0.923879532511287,1.,0.923879532511287,1.,0.923879532511287,1.,0.923879532511287,
1.,0.923879532511287,1.,0.923879532511287,1.,0.923879532511287,1.,0.923879532511287,
1.,0.923879532511287,1.,0.923879532511287,1.,0.923879532511287,1.,0.923879532511287,
1.,0.923879532511287,1.,0.923879532511287,1.,0.923879532511287,1.,0.923879532511287,
1.,0.923879532511287,1.,0.923879532511287,1.,0.923879532511287,1.,0.923879532511287,
1.,0.923879532511287,1.,0.923879532511287,1.,0.923879532511287,1.,0.923879532511287,
1.,0.923879532511287,1.,0.923879532511287,1.,0.923879532511287,1.,0.923879532511287,
1.,0.923879532511287,1.,0.923879532511287,1.,0.923879532511287,1.,0.923879532511287,
1.,0.923879532511287,1.,0.923879532511287,1.,0.923879532511287,1.,0.923879532511287,
1.,0.923879532511287,1.,0.923879532511287,1.,0.923879532511287,1.,0.923879532511287,
1.,0.923879532511287,1.,0.923879532511287,1.,0.923879532511287,1.,0.923879532511287,
1.,0.923879532511287,1.,0.923879532511287,1.,0.923879532511287,1.,0.923879532511287,
1.,0.923879532511287,1.,0.923879532511287,1.,0.923879532511287,1.,0.923879532511287,
1.,0.923879532511287,1.,0.923879532511287,1.,0.923879532511287,1.,0.923879532511287,
1.,0.923879532511287,1.,0.923879532511287,1.,0.923879532511287,1.,0.923879532511287,
1.,0.923879532511287,1.,0.923879532511287,1.,0.923879532511287,1.,0.923879532511287,
1.,0.923879532511287,1.,0.923879532511287,1.,0.923879532511287,1.,0.923879532511287,
1.,0.923879532511287,1.,0.923879532511287,1.,0.923879532511287,1.,0.923879532511287,
1.,0.923879532511287,1.,0.923879532511287,1.,0.923879532511287,1.,0.923879532511287,
1.,0.923879532511287,1.,0.923879532511287,1.,0.923879532511287,1.,0.923879532511287,
1.,0.923879532511287,1.,0.923879532511287,1.,0.923879532511287,1.,0.923879532511287,
1.,0.923879532511287,1.,0.923879532511287,1.,0.923879532511287,1.,0.923879532511287,
1.,0.923879532511287,1.,0.923879532511287,1.,0.923879532511287,1.,0.923879532511287,
1.,0.923879532511287,1.,0.923879532511287,1.,0.923879532511287,1.,0.923879532511287,
1.,0.923879532511287,1.,0.923879532511287,1.,0.923879532511287,1.,0.923879532511287,
1.,0.923879532511287,1.,0.923879532511287,1.,0.923879532511287,1.,0.923879532511287,
1.,0.923879532511287,1.,0.923879532511287,1.,0.923879532511287,1.,0.923879532511287,
1.,0.926994624692665,0.994024774641533)))
REPRESENTATION_ITEM('')
SURFACE()
);
#763=(
BOUNDED_SURFACE()
B_SPLINE_SURFACE(1,2,((#179681,#179682,#179683,#179684,#179685,#179686,
#179687,#179688,#179689,#179690,#179691,#179692,#179693,#179694,#179695,
#179696,#179697,#179698,#179699,#179700,#179701,#179702,#179703,#179704,
#179705,#179706,#179707,#179708,#179709,#179710,#179711,#179712,#179713,
#179714,#179715,#179716,#179717,#179718,#179719,#179720,#179721,#179722,
#179723,#179724,#179725,#179726,#179727,#179728,#179729,#179730,#179731,
#179732,#179733,#179734,#179735,#179736,#179737,#179738,#179739,#179740,
#179741,#179742,#179743,#179744,#179745,#179746,#179747,#179748,#179749,
#179750,#179751,#179752,#179753,#179754,#179755,#179756,#179757,#179758,
#179759,#179760,#179761,#179762,#179763,#179764,#179765,#179766,#179767,
#179768,#179769,#179770,#179771,#179772,#179773,#179774,#179775,#179776,
#179777,#179778,#179779,#179780,#179781,#179782,#179783,#179784,#179785,
#179786,#179787,#179788,#179789,#179790,#179791,#179792,#179793,#179794,
#179795,#179796,#179797,#179798,#179799,#179800,#179801,#179802,#179803,
#179804,#179805,#179806,#179807,#179808,#179809,#179810,#179811,#179812,
#179813,#179814,#179815,#179816,#179817,#179818,#179819,#179820,#179821,
#179822,#179823,#179824,#179825,#179826,#179827,#179828,#179829,#179830,
#179831,#179832,#179833,#179834,#179835,#179836,#179837,#179838,#179839,
#179840,#179841,#179842,#179843,#179844,#179845,#179846,#179847,#179848,
#179849,#179850,#179851,#179852,#179853,#179854,#179855,#179856,#179857,
#179858,#179859,#179860,#179861,#179862,#179863,#179864,#179865,#179866,
#179867,#179868,#179869,#179870,#179871,#179872,#179873,#179874,#179875,
#179876,#179877,#179878,#179879,#179880,#179881,#179882,#179883,#179884,
#179885,#179886,#179887,#179888,#179889,#179890,#179891,#179892,#179893,
#179894,#179895,#179896,#179897,#179898,#179899,#179900,#179901,#179902,
#179903,#179904,#179905,#179906,#179907,#179908,#179909,#179910,#179911,
#179912,#179913,#179914,#179915,#179916,#179917,#179918,#179919,#179920,
#179921,#179922,#179923),(#179924,#179925,#179926,#179927,#179928,#179929,
#179930,#179931,#179932,#179933,#179934,#179935,#179936,#179937,#179938,
#179939,#179940,#179941,#179942,#179943,#179944,#179945,#179946,#179947,
#179948,#179949,#179950,#179951,#179952,#179953,#179954,#179955,#179956,
#179957,#179958,#179959,#179960,#179961,#179962,#179963,#179964,#179965,
#179966,#179967,#179968,#179969,#179970,#179971,#179972,#179973,#179974,
#179975,#179976,#179977,#179978,#179979,#179980,#179981,#179982,#179983,
#179984,#179985,#179986,#179987,#179988,#179989,#179990,#179991,#179992,
#179993,#179994,#179995,#179996,#179997,#179998,#179999,#180000,#180001,
#180002,#180003,#180004,#180005,#180006,#180007,#180008,#180009,#180010,
#180011,#180012,#180013,#180014,#180015,#180016,#180017,#180018,#180019,
#180020,#180021,#180022,#180023,#180024,#180025,#180026,#180027,#180028,
#180029,#180030,#180031,#180032,#180033,#180034,#180035,#180036,#180037,
#180038,#180039,#180040,#180041,#180042,#180043,#180044,#180045,#180046,
#180047,#180048,#180049,#180050,#180051,#180052,#180053,#180054,#180055,
#180056,#180057,#180058,#180059,#180060,#180061,#180062,#180063,#180064,
#180065,#180066,#180067,#180068,#180069,#180070,#180071,#180072,#180073,
#180074,#180075,#180076,#180077,#180078,#180079,#180080,#180081,#180082,
#180083,#180084,#180085,#180086,#180087,#180088,#180089,#180090,#180091,
#180092,#180093,#180094,#180095,#180096,#180097,#180098,#180099,#180100,
#180101,#180102,#180103,#180104,#180105,#180106,#180107,#180108,#180109,
#180110,#180111,#180112,#180113,#180114,#180115,#180116,#180117,#180118,
#180119,#180120,#180121,#180122,#180123,#180124,#180125,#180126,#180127,
#180128,#180129,#180130,#180131,#180132,#180133,#180134,#180135,#180136,
#180137,#180138,#180139,#180140,#180141,#180142,#180143,#180144,#180145,
#180146,#180147,#180148,#180149,#180150,#180151,#180152,#180153,#180154,
#180155,#180156,#180157,#180158,#180159,#180160,#180161,#180162,#180163,
#180164,#180165,#180166)),.UNSPECIFIED.,.F.,.F.,.F.)
B_SPLINE_SURFACE_WITH_KNOTS((2,2),(3,2,2,2,2,2,2,2,2,2,2,2,2,2,2,2,2,2,
2,2,2,2,2,2,2,2,2,2,2,2,2,2,2,2,2,2,2,2,2,2,2,2,2,2,2,2,2,2,2,2,2,2,2,2,
2,2,2,2,2,2,2,2,2,2,2,2,2,2,2,2,2,2,2,2,2,2,2,2,2,2,2,2,2,2,2,2,2,2,2,2,
2,2,2,2,2,2,2,2,2,2,2,2,2,2,2,2,2,2,2,2,2,2,2,2,2,2,2,2,2,2,2,3),(0.,1.),
(0.,0.0078125,0.015625,0.0234375,0.03125,0.0390625,0.046875,0.0546875,0.0625,
0.0703125,0.078125,0.0859375,0.09375,0.1015625,0.109375,0.1171875,0.125,
0.1328125,0.140625,0.1484375,0.15625,0.1640625,0.171875,0.1796875,0.1875,
0.1953125,0.203125,0.2109375,0.21875,0.2265625,0.234375,0.2421875,0.25,
0.2578125,0.265625,0.2734375,0.28125,0.2890625,0.296875,0.3046875,0.3125,
0.3203125,0.328125,0.3359375,0.34375,0.3515625,0.359375,0.3671875,0.375,
0.3828125,0.390625,0.3984375,0.40625,0.4140625,0.421875,0.4296875,0.4375,
0.4453125,0.453125,0.4609375,0.46875,0.4765625,0.484375,0.4921875,0.5,0.5078125,
0.515625,0.5234375,0.53125,0.5390625,0.546875,0.5546875,0.5625,0.5703125,
0.578125,0.5859375,0.59375,0.6015625,0.609375,0.6171875,0.625,0.6328125,
0.640625,0.6484375,0.65625,0.6640625,0.671875,0.6796875,0.6875,0.6953125,
0.703125,0.7109375,0.71875,0.7265625,0.734375,0.7421875,0.75,0.7578125,
0.765625,0.7734375,0.78125,0.7890625,0.796875,0.8046875,0.8125,0.8203125,
0.828125,0.8359375,0.84375,0.8515625,0.859375,0.8671875,0.875,0.8828125,
0.890625,0.8984375,0.90625,0.9140625,0.921875,0.9296875,0.9375,0.944992787595834),
 .UNSPECIFIED.)
GEOMETRIC_REPRESENTATION_ITEM()
RATIONAL_B_SPLINE_SURFACE(((1.,0.923879532511287,1.,0.923879532511287,1.,
0.923879532511287,1.,0.923879532511287,1.,0.923879532511287,1.,0.923879532511287,
1.,0.923879532511287,1.,0.923879532511287,1.,0.923879532511287,1.,0.923879532511287,
1.,0.923879532511287,1.,0.923879532511287,1.,0.923879532511287,1.,0.923879532511287,
1.,0.923879532511287,1.,0.923879532511287,1.,0.923879532511287,1.,0.923879532511287,
1.,0.923879532511287,1.,0.923879532511287,1.,0.923879532511287,1.,0.923879532511287,
1.,0.923879532511287,1.,0.923879532511287,1.,0.923879532511287,1.,0.923879532511287,
1.,0.923879532511287,1.,0.923879532511287,1.,0.923879532511287,1.,0.923879532511287,
1.,0.923879532511287,1.,0.923879532511287,1.,0.923879532511287,1.,0.923879532511287,
1.,0.923879532511287,1.,0.923879532511287,1.,0.923879532511287,1.,0.923879532511287,
1.,0.923879532511287,1.,0.923879532511287,1.,0.923879532511287,1.,0.923879532511287,
1.,0.923879532511287,1.,0.923879532511287,1.,0.923879532511287,1.,0.923879532511287,
1.,0.923879532511287,1.,0.923879532511287,1.,0.923879532511287,1.,0.923879532511287,
1.,0.923879532511287,1.,0.923879532511287,1.,0.923879532511287,1.,0.923879532511287,
1.,0.923879532511287,1.,0.923879532511287,1.,0.923879532511287,1.,0.923879532511287,
1.,0.923879532511287,1.,0.923879532511287,1.,0.923879532511287,1.,0.923879532511287,
1.,0.923879532511287,1.,0.923879532511287,1.,0.923879532511287,1.,0.923879532511287,
1.,0.923879532511287,1.,0.923879532511287,1.,0.923879532511287,1.,0.923879532511287,
1.,0.923879532511287,1.,0.923879532511287,1.,0.923879532511287,1.,0.923879532511287,
1.,0.923879532511287,1.,0.923879532511287,1.,0.923879532511287,1.,0.923879532511287,
1.,0.923879532511287,1.,0.923879532511287,1.,0.923879532511287,1.,0.923879532511287,
1.,0.923879532511287,1.,0.923879532511287,1.,0.923879532511287,1.,0.923879532511287,
1.,0.923879532511287,1.,0.923879532511287,1.,0.923879532511287,1.,0.923879532511287,
1.,0.923879532511287,1.,0.923879532511287,1.,0.923879532511287,1.,0.923879532511287,
1.,0.923879532511287,1.,0.923879532511287,1.,0.923879532511287,1.,0.923879532511287,
1.,0.923879532511287,1.,0.923879532511287,1.,0.923879532511287,1.,0.923879532511287,
1.,0.923879532511287,1.,0.923879532511287,1.,0.923879532511287,1.,0.923879532511287,
1.,0.923879532511287,1.,0.923879532511287,1.,0.923879532511287,1.,0.923879532511287,
1.,0.923879532511287,1.,0.923879532511287,1.,0.923879532511287,1.,0.923879532511287,
1.,0.923879532511287,1.,0.923879532511287,1.,0.923879532511287,1.,0.923879532511287,
1.,0.923879532511287,1.,0.923879532511287,1.,0.926994624692665,0.994024774641533),
(1.,0.923879532511287,1.,0.923879532511287,1.,0.923879532511287,1.,0.923879532511287,
1.,0.923879532511287,1.,0.923879532511287,1.,0.923879532511287,1.,0.923879532511287,
1.,0.923879532511287,1.,0.923879532511287,1.,0.923879532511287,1.,0.923879532511287,
1.,0.923879532511287,1.,0.923879532511287,1.,0.923879532511287,1.,0.923879532511287,
1.,0.923879532511287,1.,0.923879532511287,1.,0.923879532511287,1.,0.923879532511287,
1.,0.923879532511287,1.,0.923879532511287,1.,0.923879532511287,1.,0.923879532511287,
1.,0.923879532511287,1.,0.923879532511287,1.,0.923879532511287,1.,0.923879532511287,
1.,0.923879532511287,1.,0.923879532511287,1.,0.923879532511287,1.,0.923879532511287,
1.,0.923879532511287,1.,0.923879532511287,1.,0.923879532511287,1.,0.923879532511287,
1.,0.923879532511287,1.,0.923879532511287,1.,0.923879532511287,1.,0.923879532511287,
1.,0.923879532511287,1.,0.923879532511287,1.,0.923879532511287,1.,0.923879532511287,
1.,0.923879532511287,1.,0.923879532511287,1.,0.923879532511287,1.,0.923879532511287,
1.,0.923879532511287,1.,0.923879532511287,1.,0.923879532511287,1.,0.923879532511287,
1.,0.923879532511287,1.,0.923879532511287,1.,0.923879532511287,1.,0.923879532511287,
1.,0.923879532511287,1.,0.923879532511287,1.,0.923879532511287,1.,0.923879532511287,
1.,0.923879532511287,1.,0.923879532511287,1.,0.923879532511287,1.,0.923879532511287,
1.,0.923879532511287,1.,0.923879532511287,1.,0.923879532511287,1.,0.923879532511287,
1.,0.923879532511287,1.,0.923879532511287,1.,0.923879532511287,1.,0.923879532511287,
1.,0.923879532511287,1.,0.923879532511287,1.,0.923879532511287,1.,0.923879532511287,
1.,0.923879532511287,1.,0.923879532511287,1.,0.923879532511287,1.,0.923879532511287,
1.,0.923879532511287,1.,0.923879532511287,1.,0.923879532511287,1.,0.923879532511287,
1.,0.923879532511287,1.,0.923879532511287,1.,0.923879532511287,1.,0.923879532511287,
1.,0.923879532511287,1.,0.923879532511287,1.,0.923879532511287,1.,0.923879532511287,
1.,0.923879532511287,1.,0.923879532511287,1.,0.923879532511287,1.,0.923879532511287,
1.,0.923879532511287,1.,0.923879532511287,1.,0.923879532511287,1.,0.923879532511287,
1.,0.923879532511287,1.,0.923879532511287,1.,0.923879532511287,1.,0.923879532511287,
1.,0.923879532511287,1.,0.923879532511287,1.,0.923879532511287,1.,0.923879532511287,
1.,0.923879532511287,1.,0.923879532511287,1.,0.923879532511287,1.,0.923879532511287,
1.,0.923879532511287,1.,0.923879532511287,1.,0.923879532511287,1.,0.923879532511287,
1.,0.923879532511287,1.,0.923879532511287,1.,0.923879532511287,1.,0.923879532511287,
1.,0.926994624692665,0.994024774641533)))
REPRESENTATION_ITEM('')
SURFACE()
);
#764=(
BOUNDED_SURFACE()
B_SPLINE_SURFACE(1,2,((#180186,#180187,#180188,#180189,#180190,#180191,
#180192,#180193,#180194,#180195,#180196,#180197,#180198,#180199,#180200,
#180201,#180202,#180203,#180204,#180205,#180206,#180207,#180208,#180209,
#180210,#180211,#180212,#180213,#180214,#180215,#180216,#180217,#180218,
#180219,#180220,#180221,#180222,#180223,#180224,#180225,#180226,#180227,
#180228,#180229,#180230,#180231,#180232,#180233,#180234,#180235,#180236,
#180237,#180238,#180239,#180240,#180241,#180242,#180243,#180244,#180245,
#180246,#180247,#180248,#180249,#180250,#180251,#180252,#180253,#180254,
#180255,#180256,#180257,#180258,#180259,#180260,#180261,#180262,#180263,
#180264,#180265,#180266,#180267,#180268,#180269,#180270,#180271,#180272,
#180273,#180274,#180275,#180276,#180277,#180278,#180279,#180280,#180281,
#180282,#180283,#180284,#180285,#180286,#180287,#180288,#180289,#180290,
#180291,#180292,#180293,#180294,#180295,#180296,#180297,#180298,#180299,
#180300,#180301,#180302,#180303,#180304,#180305,#180306,#180307,#180308,
#180309,#180310,#180311,#180312,#180313,#180314,#180315,#180316,#180317,
#180318,#180319,#180320,#180321,#180322,#180323,#180324,#180325,#180326,
#180327,#180328,#180329,#180330,#180331,#180332,#180333,#180334,#180335,
#180336,#180337,#180338,#180339,#180340,#180341,#180342,#180343,#180344,
#180345,#180346,#180347,#180348,#180349,#180350,#180351,#180352,#180353,
#180354,#180355,#180356,#180357,#180358,#180359,#180360,#180361,#180362,
#180363,#180364,#180365,#180366,#180367,#180368,#180369,#180370,#180371,
#180372,#180373,#180374,#180375,#180376,#180377,#180378,#180379,#180380,
#180381,#180382,#180383,#180384,#180385,#180386,#180387,#180388,#180389,
#180390,#180391,#180392,#180393,#180394,#180395,#180396,#180397,#180398,
#180399,#180400,#180401,#180402,#180403,#180404,#180405,#180406,#180407,
#180408,#180409,#180410,#180411,#180412,#180413,#180414,#180415,#180416,
#180417,#180418,#180419,#180420,#180421,#180422,#180423,#180424,#180425,
#180426,#180427,#180428),(#180429,#180430,#180431,#180432,#180433,#180434,
#180435,#180436,#180437,#180438,#180439,#180440,#180441,#180442,#180443,
#180444,#180445,#180446,#180447,#180448,#180449,#180450,#180451,#180452,
#180453,#180454,#180455,#180456,#180457,#180458,#180459,#180460,#180461,
#180462,#180463,#180464,#180465,#180466,#180467,#180468,#180469,#180470,
#180471,#180472,#180473,#180474,#180475,#180476,#180477,#180478,#180479,
#180480,#180481,#180482,#180483,#180484,#180485,#180486,#180487,#180488,
#180489,#180490,#180491,#180492,#180493,#180494,#180495,#180496,#180497,
#180498,#180499,#180500,#180501,#180502,#180503,#180504,#180505,#180506,
#180507,#180508,#180509,#180510,#180511,#180512,#180513,#180514,#180515,
#180516,#180517,#180518,#180519,#180520,#180521,#180522,#180523,#180524,
#180525,#180526,#180527,#180528,#180529,#180530,#180531,#180532,#180533,
#180534,#180535,#180536,#180537,#180538,#180539,#180540,#180541,#180542,
#180543,#180544,#180545,#180546,#180547,#180548,#180549,#180550,#180551,
#180552,#180553,#180554,#180555,#180556,#180557,#180558,#180559,#180560,
#180561,#180562,#180563,#180564,#180565,#180566,#180567,#180568,#180569,
#180570,#180571,#180572,#180573,#180574,#180575,#180576,#180577,#180578,
#180579,#180580,#180581,#180582,#180583,#180584,#180585,#180586,#180587,
#180588,#180589,#180590,#180591,#180592,#180593,#180594,#180595,#180596,
#180597,#180598,#180599,#180600,#180601,#180602,#180603,#180604,#180605,
#180606,#180607,#180608,#180609,#180610,#180611,#180612,#180613,#180614,
#180615,#180616,#180617,#180618,#180619,#180620,#180621,#180622,#180623,
#180624,#180625,#180626,#180627,#180628,#180629,#180630,#180631,#180632,
#180633,#180634,#180635,#180636,#180637,#180638,#180639,#180640,#180641,
#180642,#180643,#180644,#180645,#180646,#180647,#180648,#180649,#180650,
#180651,#180652,#180653,#180654,#180655,#180656,#180657,#180658,#180659,
#180660,#180661,#180662,#180663,#180664,#180665,#180666,#180667,#180668,
#180669,#180670,#180671)),.UNSPECIFIED.,.F.,.F.,.F.)
B_SPLINE_SURFACE_WITH_KNOTS((2,2),(3,2,2,2,2,2,2,2,2,2,2,2,2,2,2,2,2,2,
2,2,2,2,2,2,2,2,2,2,2,2,2,2,2,2,2,2,2,2,2,2,2,2,2,2,2,2,2,2,2,2,2,2,2,2,
2,2,2,2,2,2,2,2,2,2,2,2,2,2,2,2,2,2,2,2,2,2,2,2,2,2,2,2,2,2,2,2,2,2,2,2,
2,2,2,2,2,2,2,2,2,2,2,2,2,2,2,2,2,2,2,2,2,2,2,2,2,2,2,2,2,2,2,3),(0.,1.),
(0.,0.0078125,0.015625,0.0234375,0.03125,0.0390625,0.046875,0.0546875,0.0625,
0.0703125,0.078125,0.0859375,0.09375,0.1015625,0.109375,0.1171875,0.125,
0.1328125,0.140625,0.1484375,0.15625,0.1640625,0.171875,0.1796875,0.1875,
0.1953125,0.203125,0.2109375,0.21875,0.2265625,0.234375,0.2421875,0.25,
0.2578125,0.265625,0.2734375,0.28125,0.2890625,0.296875,0.3046875,0.3125,
0.3203125,0.328125,0.3359375,0.34375,0.3515625,0.359375,0.3671875,0.375,
0.3828125,0.390625,0.3984375,0.40625,0.4140625,0.421875,0.4296875,0.4375,
0.4453125,0.453125,0.4609375,0.46875,0.4765625,0.484375,0.4921875,0.5,0.5078125,
0.515625,0.5234375,0.53125,0.5390625,0.546875,0.5546875,0.5625,0.5703125,
0.578125,0.5859375,0.59375,0.6015625,0.609375,0.6171875,0.625,0.6328125,
0.640625,0.6484375,0.65625,0.6640625,0.671875,0.6796875,0.6875,0.6953125,
0.703125,0.7109375,0.71875,0.7265625,0.734375,0.7421875,0.75,0.7578125,
0.765625,0.7734375,0.78125,0.7890625,0.796875,0.8046875,0.8125,0.8203125,
0.828125,0.8359375,0.84375,0.8515625,0.859375,0.8671875,0.875,0.8828125,
0.890625,0.8984375,0.90625,0.9140625,0.921875,0.9296875,0.9375,0.944992787595834),
 .UNSPECIFIED.)
GEOMETRIC_REPRESENTATION_ITEM()
RATIONAL_B_SPLINE_SURFACE(((1.,0.923879532511287,1.,0.923879532511287,1.,
0.923879532511287,1.,0.923879532511287,1.,0.923879532511287,1.,0.923879532511287,
1.,0.923879532511287,1.,0.923879532511287,1.,0.923879532511287,1.,0.923879532511287,
1.,0.923879532511287,1.,0.923879532511287,1.,0.923879532511287,1.,0.923879532511287,
1.,0.923879532511287,1.,0.923879532511287,1.,0.923879532511287,1.,0.923879532511287,
1.,0.923879532511287,1.,0.923879532511287,1.,0.923879532511287,1.,0.923879532511287,
1.,0.923879532511287,1.,0.923879532511287,1.,0.923879532511287,1.,0.923879532511287,
1.,0.923879532511287,1.,0.923879532511287,1.,0.923879532511287,1.,0.923879532511287,
1.,0.923879532511287,1.,0.923879532511287,1.,0.923879532511287,1.,0.923879532511287,
1.,0.923879532511287,1.,0.923879532511287,1.,0.923879532511287,1.,0.923879532511287,
1.,0.923879532511287,1.,0.923879532511287,1.,0.923879532511287,1.,0.923879532511287,
1.,0.923879532511287,1.,0.923879532511287,1.,0.923879532511287,1.,0.923879532511287,
1.,0.923879532511287,1.,0.923879532511287,1.,0.923879532511287,1.,0.923879532511287,
1.,0.923879532511287,1.,0.923879532511287,1.,0.923879532511287,1.,0.923879532511287,
1.,0.923879532511287,1.,0.923879532511287,1.,0.923879532511287,1.,0.923879532511287,
1.,0.923879532511287,1.,0.923879532511287,1.,0.923879532511287,1.,0.923879532511287,
1.,0.923879532511287,1.,0.923879532511287,1.,0.923879532511287,1.,0.923879532511287,
1.,0.923879532511287,1.,0.923879532511287,1.,0.923879532511287,1.,0.923879532511287,
1.,0.923879532511287,1.,0.923879532511287,1.,0.923879532511287,1.,0.923879532511287,
1.,0.923879532511287,1.,0.923879532511287,1.,0.923879532511287,1.,0.923879532511287,
1.,0.923879532511287,1.,0.923879532511287,1.,0.923879532511287,1.,0.923879532511287,
1.,0.923879532511287,1.,0.923879532511287,1.,0.923879532511287,1.,0.923879532511287,
1.,0.923879532511287,1.,0.923879532511287,1.,0.923879532511287,1.,0.923879532511287,
1.,0.923879532511287,1.,0.923879532511287,1.,0.923879532511287,1.,0.923879532511287,
1.,0.923879532511287,1.,0.923879532511287,1.,0.923879532511287,1.,0.923879532511287,
1.,0.923879532511287,1.,0.923879532511287,1.,0.923879532511287,1.,0.923879532511287,
1.,0.923879532511287,1.,0.923879532511287,1.,0.923879532511287,1.,0.923879532511287,
1.,0.923879532511287,1.,0.923879532511287,1.,0.923879532511287,1.,0.923879532511287,
1.,0.923879532511287,1.,0.923879532511287,1.,0.923879532511287,1.,0.923879532511287,
1.,0.923879532511287,1.,0.923879532511287,1.,0.923879532511287,1.,0.923879532511287,
1.,0.923879532511287,1.,0.923879532511287,1.,0.926994624692665,0.994024774641533),
(1.,0.923879532511287,1.,0.923879532511287,1.,0.923879532511287,1.,0.923879532511287,
1.,0.923879532511287,1.,0.923879532511287,1.,0.923879532511287,1.,0.923879532511287,
1.,0.923879532511287,1.,0.923879532511287,1.,0.923879532511287,1.,0.923879532511287,
1.,0.923879532511287,1.,0.923879532511287,1.,0.923879532511287,1.,0.923879532511287,
1.,0.923879532511287,1.,0.923879532511287,1.,0.923879532511287,1.,0.923879532511287,
1.,0.923879532511287,1.,0.923879532511287,1.,0.923879532511287,1.,0.923879532511287,
1.,0.923879532511287,1.,0.923879532511287,1.,0.923879532511287,1.,0.923879532511287,
1.,0.923879532511287,1.,0.923879532511287,1.,0.923879532511287,1.,0.923879532511287,
1.,0.923879532511287,1.,0.923879532511287,1.,0.923879532511287,1.,0.923879532511287,
1.,0.923879532511287,1.,0.923879532511287,1.,0.923879532511287,1.,0.923879532511287,
1.,0.923879532511287,1.,0.923879532511287,1.,0.923879532511287,1.,0.923879532511287,
1.,0.923879532511287,1.,0.923879532511287,1.,0.923879532511287,1.,0.923879532511287,
1.,0.923879532511287,1.,0.923879532511287,1.,0.923879532511287,1.,0.923879532511287,
1.,0.923879532511287,1.,0.923879532511287,1.,0.923879532511287,1.,0.923879532511287,
1.,0.923879532511287,1.,0.923879532511287,1.,0.923879532511287,1.,0.923879532511287,
1.,0.923879532511287,1.,0.923879532511287,1.,0.923879532511287,1.,0.923879532511287,
1.,0.923879532511287,1.,0.923879532511287,1.,0.923879532511287,1.,0.923879532511287,
1.,0.923879532511287,1.,0.923879532511287,1.,0.923879532511287,1.,0.923879532511287,
1.,0.923879532511287,1.,0.923879532511287,1.,0.923879532511287,1.,0.923879532511287,
1.,0.923879532511287,1.,0.923879532511287,1.,0.923879532511287,1.,0.923879532511287,
1.,0.923879532511287,1.,0.923879532511287,1.,0.923879532511287,1.,0.923879532511287,
1.,0.923879532511287,1.,0.923879532511287,1.,0.923879532511287,1.,0.923879532511287,
1.,0.923879532511287,1.,0.923879532511287,1.,0.923879532511287,1.,0.923879532511287,
1.,0.923879532511287,1.,0.923879532511287,1.,0.923879532511287,1.,0.923879532511287,
1.,0.923879532511287,1.,0.923879532511287,1.,0.923879532511287,1.,0.923879532511287,
1.,0.923879532511287,1.,0.923879532511287,1.,0.923879532511287,1.,0.923879532511287,
1.,0.923879532511287,1.,0.923879532511287,1.,0.923879532511287,1.,0.923879532511287,
1.,0.923879532511287,1.,0.923879532511287,1.,0.923879532511287,1.,0.923879532511287,
1.,0.923879532511287,1.,0.923879532511287,1.,0.923879532511287,1.,0.923879532511287,
1.,0.923879532511287,1.,0.923879532511287,1.,0.923879532511287,1.,0.923879532511287,
1.,0.926994624692665,0.994024774641533)))
REPRESENTATION_ITEM('')
SURFACE()
);
#765=(
BOUNDED_SURFACE()
B_SPLINE_SURFACE(1,2,((#180691,#180692,#180693,#180694,#180695,#180696,
#180697,#180698,#180699,#180700,#180701,#180702,#180703,#180704,#180705,
#180706,#180707,#180708,#180709,#180710,#180711,#180712,#180713,#180714,
#180715,#180716,#180717,#180718,#180719,#180720,#180721,#180722,#180723,
#180724,#180725,#180726,#180727,#180728,#180729,#180730,#180731,#180732,
#180733,#180734,#180735,#180736,#180737,#180738,#180739,#180740,#180741,
#180742,#180743,#180744,#180745,#180746,#180747,#180748,#180749,#180750,
#180751,#180752,#180753,#180754,#180755,#180756,#180757,#180758,#180759,
#180760,#180761,#180762,#180763,#180764,#180765,#180766,#180767,#180768,
#180769,#180770,#180771,#180772,#180773,#180774,#180775,#180776,#180777,
#180778,#180779,#180780,#180781,#180782,#180783,#180784,#180785,#180786,
#180787,#180788,#180789,#180790,#180791,#180792,#180793,#180794,#180795,
#180796,#180797,#180798,#180799,#180800,#180801,#180802,#180803,#180804,
#180805,#180806,#180807,#180808,#180809,#180810,#180811,#180812,#180813,
#180814,#180815,#180816,#180817,#180818,#180819,#180820,#180821,#180822,
#180823,#180824,#180825,#180826,#180827,#180828,#180829,#180830,#180831,
#180832,#180833,#180834,#180835,#180836,#180837,#180838,#180839,#180840,
#180841,#180842,#180843,#180844,#180845,#180846,#180847,#180848,#180849,
#180850,#180851,#180852,#180853,#180854,#180855,#180856,#180857,#180858,
#180859,#180860,#180861,#180862,#180863,#180864,#180865,#180866,#180867,
#180868,#180869,#180870,#180871,#180872,#180873,#180874,#180875,#180876,
#180877,#180878,#180879,#180880,#180881,#180882,#180883,#180884,#180885,
#180886,#180887,#180888,#180889,#180890,#180891,#180892,#180893,#180894,
#180895,#180896,#180897,#180898,#180899,#180900,#180901,#180902,#180903,
#180904,#180905,#180906,#180907,#180908,#180909,#180910,#180911,#180912,
#180913,#180914,#180915,#180916,#180917,#180918,#180919,#180920,#180921,
#180922,#180923,#180924,#180925,#180926,#180927,#180928,#180929,#180930,
#180931,#180932,#180933),(#180934,#180935,#180936,#180937,#180938,#180939,
#180940,#180941,#180942,#180943,#180944,#180945,#180946,#180947,#180948,
#180949,#180950,#180951,#180952,#180953,#180954,#180955,#180956,#180957,
#180958,#180959,#180960,#180961,#180962,#180963,#180964,#180965,#180966,
#180967,#180968,#180969,#180970,#180971,#180972,#180973,#180974,#180975,
#180976,#180977,#180978,#180979,#180980,#180981,#180982,#180983,#180984,
#180985,#180986,#180987,#180988,#180989,#180990,#180991,#180992,#180993,
#180994,#180995,#180996,#180997,#180998,#180999,#181000,#181001,#181002,
#181003,#181004,#181005,#181006,#181007,#181008,#181009,#181010,#181011,
#181012,#181013,#181014,#181015,#181016,#181017,#181018,#181019,#181020,
#181021,#181022,#181023,#181024,#181025,#181026,#181027,#181028,#181029,
#181030,#181031,#181032,#181033,#181034,#181035,#181036,#181037,#181038,
#181039,#181040,#181041,#181042,#181043,#181044,#181045,#181046,#181047,
#181048,#181049,#181050,#181051,#181052,#181053,#181054,#181055,#181056,
#181057,#181058,#181059,#181060,#181061,#181062,#181063,#181064,#181065,
#181066,#181067,#181068,#181069,#181070,#181071,#181072,#181073,#181074,
#181075,#181076,#181077,#181078,#181079,#181080,#181081,#181082,#181083,
#181084,#181085,#181086,#181087,#181088,#181089,#181090,#181091,#181092,
#181093,#181094,#181095,#181096,#181097,#181098,#181099,#181100,#181101,
#181102,#181103,#181104,#181105,#181106,#181107,#181108,#181109,#181110,
#181111,#181112,#181113,#181114,#181115,#181116,#181117,#181118,#181119,
#181120,#181121,#181122,#181123,#181124,#181125,#181126,#181127,#181128,
#181129,#181130,#181131,#181132,#181133,#181134,#181135,#181136,#181137,
#181138,#181139,#181140,#181141,#181142,#181143,#181144,#181145,#181146,
#181147,#181148,#181149,#181150,#181151,#181152,#181153,#181154,#181155,
#181156,#181157,#181158,#181159,#181160,#181161,#181162,#181163,#181164,
#181165,#181166,#181167,#181168,#181169,#181170,#181171,#181172,#181173,
#181174,#181175,#181176)),.UNSPECIFIED.,.F.,.F.,.F.)
B_SPLINE_SURFACE_WITH_KNOTS((2,2),(3,2,2,2,2,2,2,2,2,2,2,2,2,2,2,2,2,2,
2,2,2,2,2,2,2,2,2,2,2,2,2,2,2,2,2,2,2,2,2,2,2,2,2,2,2,2,2,2,2,2,2,2,2,2,
2,2,2,2,2,2,2,2,2,2,2,2,2,2,2,2,2,2,2,2,2,2,2,2,2,2,2,2,2,2,2,2,2,2,2,2,
2,2,2,2,2,2,2,2,2,2,2,2,2,2,2,2,2,2,2,2,2,2,2,2,2,2,2,2,2,2,2,3),(0.,1.),
(0.,0.0078125,0.015625,0.0234375,0.03125,0.0390625,0.046875,0.0546875,0.0625,
0.0703125,0.078125,0.0859375,0.09375,0.1015625,0.109375,0.1171875,0.125,
0.1328125,0.140625,0.1484375,0.15625,0.1640625,0.171875,0.1796875,0.1875,
0.1953125,0.203125,0.2109375,0.21875,0.2265625,0.234375,0.2421875,0.25,
0.2578125,0.265625,0.2734375,0.28125,0.2890625,0.296875,0.3046875,0.3125,
0.3203125,0.328125,0.3359375,0.34375,0.3515625,0.359375,0.3671875,0.375,
0.3828125,0.390625,0.3984375,0.40625,0.4140625,0.421875,0.4296875,0.4375,
0.4453125,0.453125,0.4609375,0.46875,0.4765625,0.484375,0.4921875,0.5,0.5078125,
0.515625,0.5234375,0.53125,0.5390625,0.546875,0.5546875,0.5625,0.5703125,
0.578125,0.5859375,0.59375,0.6015625,0.609375,0.6171875,0.625,0.6328125,
0.640625,0.6484375,0.65625,0.6640625,0.671875,0.6796875,0.6875,0.6953125,
0.703125,0.7109375,0.71875,0.7265625,0.734375,0.7421875,0.75,0.7578125,
0.765625,0.7734375,0.78125,0.7890625,0.796875,0.8046875,0.8125,0.8203125,
0.828125,0.8359375,0.84375,0.8515625,0.859375,0.8671875,0.875,0.8828125,
0.890625,0.8984375,0.90625,0.9140625,0.921875,0.9296875,0.9375,0.944992787595834),
 .UNSPECIFIED.)
GEOMETRIC_REPRESENTATION_ITEM()
RATIONAL_B_SPLINE_SURFACE(((1.,0.923879532511287,1.,0.923879532511287,1.,
0.923879532511287,1.,0.923879532511287,1.,0.923879532511287,1.,0.923879532511287,
1.,0.923879532511287,1.,0.923879532511287,1.,0.923879532511287,1.,0.923879532511287,
1.,0.923879532511287,1.,0.923879532511287,1.,0.923879532511287,1.,0.923879532511287,
1.,0.923879532511287,1.,0.923879532511287,1.,0.923879532511287,1.,0.923879532511287,
1.,0.923879532511287,1.,0.923879532511287,1.,0.923879532511287,1.,0.923879532511287,
1.,0.923879532511287,1.,0.923879532511287,1.,0.923879532511287,1.,0.923879532511287,
1.,0.923879532511287,1.,0.923879532511287,1.,0.923879532511287,1.,0.923879532511287,
1.,0.923879532511287,1.,0.923879532511287,1.,0.923879532511287,1.,0.923879532511287,
1.,0.923879532511287,1.,0.923879532511287,1.,0.923879532511287,1.,0.923879532511287,
1.,0.923879532511287,1.,0.923879532511287,1.,0.923879532511287,1.,0.923879532511287,
1.,0.923879532511287,1.,0.923879532511287,1.,0.923879532511287,1.,0.923879532511287,
1.,0.923879532511287,1.,0.923879532511287,1.,0.923879532511287,1.,0.923879532511287,
1.,0.923879532511287,1.,0.923879532511287,1.,0.923879532511287,1.,0.923879532511287,
1.,0.923879532511287,1.,0.923879532511287,1.,0.923879532511287,1.,0.923879532511287,
1.,0.923879532511287,1.,0.923879532511287,1.,0.923879532511287,1.,0.923879532511287,
1.,0.923879532511287,1.,0.923879532511287,1.,0.923879532511287,1.,0.923879532511287,
1.,0.923879532511287,1.,0.923879532511287,1.,0.923879532511287,1.,0.923879532511287,
1.,0.923879532511287,1.,0.923879532511287,1.,0.923879532511287,1.,0.923879532511287,
1.,0.923879532511287,1.,0.923879532511287,1.,0.923879532511287,1.,0.923879532511287,
1.,0.923879532511287,1.,0.923879532511287,1.,0.923879532511287,1.,0.923879532511287,
1.,0.923879532511287,1.,0.923879532511287,1.,0.923879532511287,1.,0.923879532511287,
1.,0.923879532511287,1.,0.923879532511287,1.,0.923879532511287,1.,0.923879532511287,
1.,0.923879532511287,1.,0.923879532511287,1.,0.923879532511287,1.,0.923879532511287,
1.,0.923879532511287,1.,0.923879532511287,1.,0.923879532511287,1.,0.923879532511287,
1.,0.923879532511287,1.,0.923879532511287,1.,0.923879532511287,1.,0.923879532511287,
1.,0.923879532511287,1.,0.923879532511287,1.,0.923879532511287,1.,0.923879532511287,
1.,0.923879532511287,1.,0.923879532511287,1.,0.923879532511287,1.,0.923879532511287,
1.,0.923879532511287,1.,0.923879532511287,1.,0.923879532511287,1.,0.923879532511287,
1.,0.923879532511287,1.,0.923879532511287,1.,0.923879532511287,1.,0.923879532511287,
1.,0.923879532511287,1.,0.923879532511287,1.,0.926994624692665,0.994024774641533),
(1.,0.923879532511287,1.,0.923879532511287,1.,0.923879532511287,1.,0.923879532511287,
1.,0.923879532511287,1.,0.923879532511287,1.,0.923879532511287,1.,0.923879532511287,
1.,0.923879532511287,1.,0.923879532511287,1.,0.923879532511287,1.,0.923879532511287,
1.,0.923879532511287,1.,0.923879532511287,1.,0.923879532511287,1.,0.923879532511287,
1.,0.923879532511287,1.,0.923879532511287,1.,0.923879532511287,1.,0.923879532511287,
1.,0.923879532511287,1.,0.923879532511287,1.,0.923879532511287,1.,0.923879532511287,
1.,0.923879532511287,1.,0.923879532511287,1.,0.923879532511287,1.,0.923879532511287,
1.,0.923879532511287,1.,0.923879532511287,1.,0.923879532511287,1.,0.923879532511287,
1.,0.923879532511287,1.,0.923879532511287,1.,0.923879532511287,1.,0.923879532511287,
1.,0.923879532511287,1.,0.923879532511287,1.,0.923879532511287,1.,0.923879532511287,
1.,0.923879532511287,1.,0.923879532511287,1.,0.923879532511287,1.,0.923879532511287,
1.,0.923879532511287,1.,0.923879532511287,1.,0.923879532511287,1.,0.923879532511287,
1.,0.923879532511287,1.,0.923879532511287,1.,0.923879532511287,1.,0.923879532511287,
1.,0.923879532511287,1.,0.923879532511287,1.,0.923879532511287,1.,0.923879532511287,
1.,0.923879532511287,1.,0.923879532511287,1.,0.923879532511287,1.,0.923879532511287,
1.,0.923879532511287,1.,0.923879532511287,1.,0.923879532511287,1.,0.923879532511287,
1.,0.923879532511287,1.,0.923879532511287,1.,0.923879532511287,1.,0.923879532511287,
1.,0.923879532511287,1.,0.923879532511287,1.,0.923879532511287,1.,0.923879532511287,
1.,0.923879532511287,1.,0.923879532511287,1.,0.923879532511287,1.,0.923879532511287,
1.,0.923879532511287,1.,0.923879532511287,1.,0.923879532511287,1.,0.923879532511287,
1.,0.923879532511287,1.,0.923879532511287,1.,0.923879532511287,1.,0.923879532511287,
1.,0.923879532511287,1.,0.923879532511287,1.,0.923879532511287,1.,0.923879532511287,
1.,0.923879532511287,1.,0.923879532511287,1.,0.923879532511287,1.,0.923879532511287,
1.,0.923879532511287,1.,0.923879532511287,1.,0.923879532511287,1.,0.923879532511287,
1.,0.923879532511287,1.,0.923879532511287,1.,0.923879532511287,1.,0.923879532511287,
1.,0.923879532511287,1.,0.923879532511287,1.,0.923879532511287,1.,0.923879532511287,
1.,0.923879532511287,1.,0.923879532511287,1.,0.923879532511287,1.,0.923879532511287,
1.,0.923879532511287,1.,0.923879532511287,1.,0.923879532511287,1.,0.923879532511287,
1.,0.923879532511287,1.,0.923879532511287,1.,0.923879532511287,1.,0.923879532511287,
1.,0.923879532511287,1.,0.923879532511287,1.,0.923879532511287,1.,0.923879532511287,
1.,0.926994624692665,0.994024774641533)))
REPRESENTATION_ITEM('')
SURFACE()
);
#766=(
BOUNDED_SURFACE()
B_SPLINE_SURFACE(1,2,((#181196,#181197,#181198,#181199,#181200,#181201,
#181202,#181203,#181204,#181205,#181206,#181207,#181208,#181209,#181210,
#181211,#181212,#181213,#181214,#181215,#181216,#181217,#181218,#181219,
#181220,#181221,#181222,#181223,#181224,#181225,#181226,#181227,#181228,
#181229,#181230,#181231,#181232,#181233,#181234,#181235,#181236,#181237,
#181238,#181239,#181240,#181241,#181242,#181243,#181244,#181245,#181246,
#181247,#181248,#181249,#181250,#181251,#181252,#181253,#181254,#181255,
#181256,#181257,#181258,#181259,#181260,#181261,#181262,#181263,#181264,
#181265,#181266,#181267,#181268,#181269,#181270,#181271,#181272,#181273,
#181274,#181275,#181276,#181277,#181278,#181279,#181280,#181281,#181282,
#181283,#181284,#181285,#181286,#181287,#181288,#181289,#181290,#181291,
#181292,#181293,#181294,#181295,#181296,#181297,#181298,#181299,#181300,
#181301,#181302,#181303,#181304,#181305,#181306,#181307,#181308,#181309,
#181310,#181311,#181312,#181313,#181314,#181315,#181316,#181317,#181318,
#181319,#181320,#181321,#181322,#181323,#181324,#181325,#181326,#181327,
#181328,#181329,#181330,#181331,#181332,#181333,#181334,#181335,#181336,
#181337,#181338,#181339,#181340,#181341,#181342,#181343,#181344,#181345,
#181346,#181347,#181348,#181349,#181350,#181351,#181352,#181353,#181354,
#181355,#181356,#181357,#181358,#181359,#181360,#181361,#181362,#181363,
#181364,#181365,#181366,#181367,#181368,#181369,#181370,#181371,#181372,
#181373,#181374,#181375,#181376,#181377,#181378,#181379,#181380,#181381,
#181382,#181383,#181384,#181385,#181386,#181387,#181388,#181389,#181390,
#181391,#181392,#181393,#181394,#181395,#181396,#181397,#181398,#181399,
#181400,#181401,#181402,#181403,#181404,#181405,#181406,#181407,#181408,
#181409,#181410,#181411,#181412,#181413,#181414,#181415,#181416,#181417,
#181418,#181419,#181420,#181421,#181422,#181423,#181424,#181425,#181426,
#181427,#181428,#181429,#181430,#181431,#181432,#181433,#181434,#181435,
#181436,#181437,#181438),(#181439,#181440,#181441,#181442,#181443,#181444,
#181445,#181446,#181447,#181448,#181449,#181450,#181451,#181452,#181453,
#181454,#181455,#181456,#181457,#181458,#181459,#181460,#181461,#181462,
#181463,#181464,#181465,#181466,#181467,#181468,#181469,#181470,#181471,
#181472,#181473,#181474,#181475,#181476,#181477,#181478,#181479,#181480,
#181481,#181482,#181483,#181484,#181485,#181486,#181487,#181488,#181489,
#181490,#181491,#181492,#181493,#181494,#181495,#181496,#181497,#181498,
#181499,#181500,#181501,#181502,#181503,#181504,#181505,#181506,#181507,
#181508,#181509,#181510,#181511,#181512,#181513,#181514,#181515,#181516,
#181517,#181518,#181519,#181520,#181521,#181522,#181523,#181524,#181525,
#181526,#181527,#181528,#181529,#181530,#181531,#181532,#181533,#181534,
#181535,#181536,#181537,#181538,#181539,#181540,#181541,#181542,#181543,
#181544,#181545,#181546,#181547,#181548,#181549,#181550,#181551,#181552,
#181553,#181554,#181555,#181556,#181557,#181558,#181559,#181560,#181561,
#181562,#181563,#181564,#181565,#181566,#181567,#181568,#181569,#181570,
#181571,#181572,#181573,#181574,#181575,#181576,#181577,#181578,#181579,
#181580,#181581,#181582,#181583,#181584,#181585,#181586,#181587,#181588,
#181589,#181590,#181591,#181592,#181593,#181594,#181595,#181596,#181597,
#181598,#181599,#181600,#181601,#181602,#181603,#181604,#181605,#181606,
#181607,#181608,#181609,#181610,#181611,#181612,#181613,#181614,#181615,
#181616,#181617,#181618,#181619,#181620,#181621,#181622,#181623,#181624,
#181625,#181626,#181627,#181628,#181629,#181630,#181631,#181632,#181633,
#181634,#181635,#181636,#181637,#181638,#181639,#181640,#181641,#181642,
#181643,#181644,#181645,#181646,#181647,#181648,#181649,#181650,#181651,
#181652,#181653,#181654,#181655,#181656,#181657,#181658,#181659,#181660,
#181661,#181662,#181663,#181664,#181665,#181666,#181667,#181668,#181669,
#181670,#181671,#181672,#181673,#181674,#181675,#181676,#181677,#181678,
#181679,#181680,#181681)),.UNSPECIFIED.,.F.,.F.,.F.)
B_SPLINE_SURFACE_WITH_KNOTS((2,2),(3,2,2,2,2,2,2,2,2,2,2,2,2,2,2,2,2,2,
2,2,2,2,2,2,2,2,2,2,2,2,2,2,2,2,2,2,2,2,2,2,2,2,2,2,2,2,2,2,2,2,2,2,2,2,
2,2,2,2,2,2,2,2,2,2,2,2,2,2,2,2,2,2,2,2,2,2,2,2,2,2,2,2,2,2,2,2,2,2,2,2,
2,2,2,2,2,2,2,2,2,2,2,2,2,2,2,2,2,2,2,2,2,2,2,2,2,2,2,2,2,2,2,3),(0.,1.),
(0.,0.0078125,0.015625,0.0234375,0.03125,0.0390625,0.046875,0.0546875,0.0625,
0.0703125,0.078125,0.0859375,0.09375,0.1015625,0.109375,0.1171875,0.125,
0.1328125,0.140625,0.1484375,0.15625,0.1640625,0.171875,0.1796875,0.1875,
0.1953125,0.203125,0.2109375,0.21875,0.2265625,0.234375,0.2421875,0.25,
0.2578125,0.265625,0.2734375,0.28125,0.2890625,0.296875,0.3046875,0.3125,
0.3203125,0.328125,0.3359375,0.34375,0.3515625,0.359375,0.3671875,0.375,
0.3828125,0.390625,0.3984375,0.40625,0.4140625,0.421875,0.4296875,0.4375,
0.4453125,0.453125,0.4609375,0.46875,0.4765625,0.484375,0.4921875,0.5,0.5078125,
0.515625,0.5234375,0.53125,0.5390625,0.546875,0.5546875,0.5625,0.5703125,
0.578125,0.5859375,0.59375,0.6015625,0.609375,0.6171875,0.625,0.6328125,
0.640625,0.6484375,0.65625,0.6640625,0.671875,0.6796875,0.6875,0.6953125,
0.703125,0.7109375,0.71875,0.7265625,0.734375,0.7421875,0.75,0.7578125,
0.765625,0.7734375,0.78125,0.7890625,0.796875,0.8046875,0.8125,0.8203125,
0.828125,0.8359375,0.84375,0.8515625,0.859375,0.8671875,0.875,0.8828125,
0.890625,0.8984375,0.90625,0.9140625,0.921875,0.9296875,0.9375,0.944992787595834),
 .UNSPECIFIED.)
GEOMETRIC_REPRESENTATION_ITEM()
RATIONAL_B_SPLINE_SURFACE(((1.,0.923879532511287,1.,0.923879532511287,1.,
0.923879532511287,1.,0.923879532511287,1.,0.923879532511287,1.,0.923879532511287,
1.,0.923879532511287,1.,0.923879532511287,1.,0.923879532511287,1.,0.923879532511287,
1.,0.923879532511287,1.,0.923879532511287,1.,0.923879532511287,1.,0.923879532511287,
1.,0.923879532511287,1.,0.923879532511287,1.,0.923879532511287,1.,0.923879532511287,
1.,0.923879532511287,1.,0.923879532511287,1.,0.923879532511287,1.,0.923879532511287,
1.,0.923879532511287,1.,0.923879532511287,1.,0.923879532511287,1.,0.923879532511287,
1.,0.923879532511287,1.,0.923879532511287,1.,0.923879532511287,1.,0.923879532511287,
1.,0.923879532511287,1.,0.923879532511287,1.,0.923879532511287,1.,0.923879532511287,
1.,0.923879532511287,1.,0.923879532511287,1.,0.923879532511287,1.,0.923879532511287,
1.,0.923879532511287,1.,0.923879532511287,1.,0.923879532511287,1.,0.923879532511287,
1.,0.923879532511287,1.,0.923879532511287,1.,0.923879532511287,1.,0.923879532511287,
1.,0.923879532511287,1.,0.923879532511287,1.,0.923879532511287,1.,0.923879532511287,
1.,0.923879532511287,1.,0.923879532511287,1.,0.923879532511287,1.,0.923879532511287,
1.,0.923879532511287,1.,0.923879532511287,1.,0.923879532511287,1.,0.923879532511287,
1.,0.923879532511287,1.,0.923879532511287,1.,0.923879532511287,1.,0.923879532511287,
1.,0.923879532511287,1.,0.923879532511287,1.,0.923879532511287,1.,0.923879532511287,
1.,0.923879532511287,1.,0.923879532511287,1.,0.923879532511287,1.,0.923879532511287,
1.,0.923879532511287,1.,0.923879532511287,1.,0.923879532511287,1.,0.923879532511287,
1.,0.923879532511287,1.,0.923879532511287,1.,0.923879532511287,1.,0.923879532511287,
1.,0.923879532511287,1.,0.923879532511287,1.,0.923879532511287,1.,0.923879532511287,
1.,0.923879532511287,1.,0.923879532511287,1.,0.923879532511287,1.,0.923879532511287,
1.,0.923879532511287,1.,0.923879532511287,1.,0.923879532511287,1.,0.923879532511287,
1.,0.923879532511287,1.,0.923879532511287,1.,0.923879532511287,1.,0.923879532511287,
1.,0.923879532511287,1.,0.923879532511287,1.,0.923879532511287,1.,0.923879532511287,
1.,0.923879532511287,1.,0.923879532511287,1.,0.923879532511287,1.,0.923879532511287,
1.,0.923879532511287,1.,0.923879532511287,1.,0.923879532511287,1.,0.923879532511287,
1.,0.923879532511287,1.,0.923879532511287,1.,0.923879532511287,1.,0.923879532511287,
1.,0.923879532511287,1.,0.923879532511287,1.,0.923879532511287,1.,0.923879532511287,
1.,0.923879532511287,1.,0.923879532511287,1.,0.923879532511287,1.,0.923879532511287,
1.,0.923879532511287,1.,0.923879532511287,1.,0.926994624692665,0.994024774641533),
(1.,0.923879532511287,1.,0.923879532511287,1.,0.923879532511287,1.,0.923879532511287,
1.,0.923879532511287,1.,0.923879532511287,1.,0.923879532511287,1.,0.923879532511287,
1.,0.923879532511287,1.,0.923879532511287,1.,0.923879532511287,1.,0.923879532511287,
1.,0.923879532511287,1.,0.923879532511287,1.,0.923879532511287,1.,0.923879532511287,
1.,0.923879532511287,1.,0.923879532511287,1.,0.923879532511287,1.,0.923879532511287,
1.,0.923879532511287,1.,0.923879532511287,1.,0.923879532511287,1.,0.923879532511287,
1.,0.923879532511287,1.,0.923879532511287,1.,0.923879532511287,1.,0.923879532511287,
1.,0.923879532511287,1.,0.923879532511287,1.,0.923879532511287,1.,0.923879532511287,
1.,0.923879532511287,1.,0.923879532511287,1.,0.923879532511287,1.,0.923879532511287,
1.,0.923879532511287,1.,0.923879532511287,1.,0.923879532511287,1.,0.923879532511287,
1.,0.923879532511287,1.,0.923879532511287,1.,0.923879532511287,1.,0.923879532511287,
1.,0.923879532511287,1.,0.923879532511287,1.,0.923879532511287,1.,0.923879532511287,
1.,0.923879532511287,1.,0.923879532511287,1.,0.923879532511287,1.,0.923879532511287,
1.,0.923879532511287,1.,0.923879532511287,1.,0.923879532511287,1.,0.923879532511287,
1.,0.923879532511287,1.,0.923879532511287,1.,0.923879532511287,1.,0.923879532511287,
1.,0.923879532511287,1.,0.923879532511287,1.,0.923879532511287,1.,0.923879532511287,
1.,0.923879532511287,1.,0.923879532511287,1.,0.923879532511287,1.,0.923879532511287,
1.,0.923879532511287,1.,0.923879532511287,1.,0.923879532511287,1.,0.923879532511287,
1.,0.923879532511287,1.,0.923879532511287,1.,0.923879532511287,1.,0.923879532511287,
1.,0.923879532511287,1.,0.923879532511287,1.,0.923879532511287,1.,0.923879532511287,
1.,0.923879532511287,1.,0.923879532511287,1.,0.923879532511287,1.,0.923879532511287,
1.,0.923879532511287,1.,0.923879532511287,1.,0.923879532511287,1.,0.923879532511287,
1.,0.923879532511287,1.,0.923879532511287,1.,0.923879532511287,1.,0.923879532511287,
1.,0.923879532511287,1.,0.923879532511287,1.,0.923879532511287,1.,0.923879532511287,
1.,0.923879532511287,1.,0.923879532511287,1.,0.923879532511287,1.,0.923879532511287,
1.,0.923879532511287,1.,0.923879532511287,1.,0.923879532511287,1.,0.923879532511287,
1.,0.923879532511287,1.,0.923879532511287,1.,0.923879532511287,1.,0.923879532511287,
1.,0.923879532511287,1.,0.923879532511287,1.,0.923879532511287,1.,0.923879532511287,
1.,0.923879532511287,1.,0.923879532511287,1.,0.923879532511287,1.,0.923879532511287,
1.,0.923879532511287,1.,0.923879532511287,1.,0.923879532511287,1.,0.923879532511287,
1.,0.926994624692665,0.994024774641533)))
REPRESENTATION_ITEM('')
SURFACE()
);
#767=(
BOUNDED_SURFACE()
B_SPLINE_SURFACE(1,2,((#181701,#181702,#181703,#181704,#181705,#181706,
#181707,#181708,#181709,#181710,#181711,#181712,#181713,#181714,#181715,
#181716,#181717,#181718,#181719,#181720,#181721,#181722,#181723,#181724,
#181725,#181726,#181727,#181728,#181729,#181730,#181731,#181732,#181733,
#181734,#181735,#181736,#181737,#181738,#181739,#181740,#181741,#181742,
#181743,#181744,#181745,#181746,#181747,#181748,#181749,#181750,#181751,
#181752,#181753,#181754,#181755,#181756,#181757,#181758,#181759,#181760,
#181761,#181762,#181763,#181764,#181765,#181766,#181767,#181768,#181769,
#181770,#181771,#181772,#181773,#181774,#181775,#181776,#181777,#181778,
#181779,#181780,#181781,#181782,#181783,#181784,#181785,#181786,#181787,
#181788,#181789,#181790,#181791,#181792,#181793,#181794,#181795,#181796,
#181797,#181798,#181799,#181800,#181801,#181802,#181803,#181804,#181805,
#181806,#181807,#181808,#181809,#181810,#181811,#181812,#181813,#181814,
#181815,#181816,#181817,#181818,#181819,#181820,#181821,#181822,#181823,
#181824,#181825,#181826,#181827,#181828,#181829,#181830,#181831,#181832,
#181833,#181834,#181835,#181836,#181837,#181838,#181839,#181840,#181841,
#181842,#181843,#181844,#181845,#181846,#181847,#181848,#181849,#181850,
#181851,#181852,#181853,#181854,#181855,#181856,#181857,#181858,#181859,
#181860,#181861,#181862,#181863,#181864,#181865,#181866,#181867,#181868,
#181869,#181870,#181871,#181872,#181873,#181874,#181875,#181876,#181877,
#181878,#181879,#181880,#181881,#181882,#181883,#181884,#181885,#181886,
#181887,#181888,#181889,#181890,#181891,#181892,#181893,#181894,#181895,
#181896,#181897,#181898,#181899,#181900,#181901,#181902,#181903,#181904,
#181905,#181906,#181907,#181908,#181909,#181910,#181911,#181912,#181913,
#181914,#181915,#181916,#181917,#181918,#181919,#181920,#181921,#181922,
#181923,#181924,#181925,#181926,#181927,#181928,#181929,#181930,#181931,
#181932,#181933,#181934,#181935,#181936,#181937,#181938,#181939,#181940,
#181941,#181942,#181943),(#181944,#181945,#181946,#181947,#181948,#181949,
#181950,#181951,#181952,#181953,#181954,#181955,#181956,#181957,#181958,
#181959,#181960,#181961,#181962,#181963,#181964,#181965,#181966,#181967,
#181968,#181969,#181970,#181971,#181972,#181973,#181974,#181975,#181976,
#181977,#181978,#181979,#181980,#181981,#181982,#181983,#181984,#181985,
#181986,#181987,#181988,#181989,#181990,#181991,#181992,#181993,#181994,
#181995,#181996,#181997,#181998,#181999,#182000,#182001,#182002,#182003,
#182004,#182005,#182006,#182007,#182008,#182009,#182010,#182011,#182012,
#182013,#182014,#182015,#182016,#182017,#182018,#182019,#182020,#182021,
#182022,#182023,#182024,#182025,#182026,#182027,#182028,#182029,#182030,
#182031,#182032,#182033,#182034,#182035,#182036,#182037,#182038,#182039,
#182040,#182041,#182042,#182043,#182044,#182045,#182046,#182047,#182048,
#182049,#182050,#182051,#182052,#182053,#182054,#182055,#182056,#182057,
#182058,#182059,#182060,#182061,#182062,#182063,#182064,#182065,#182066,
#182067,#182068,#182069,#182070,#182071,#182072,#182073,#182074,#182075,
#182076,#182077,#182078,#182079,#182080,#182081,#182082,#182083,#182084,
#182085,#182086,#182087,#182088,#182089,#182090,#182091,#182092,#182093,
#182094,#182095,#182096,#182097,#182098,#182099,#182100,#182101,#182102,
#182103,#182104,#182105,#182106,#182107,#182108,#182109,#182110,#182111,
#182112,#182113,#182114,#182115,#182116,#182117,#182118,#182119,#182120,
#182121,#182122,#182123,#182124,#182125,#182126,#182127,#182128,#182129,
#182130,#182131,#182132,#182133,#182134,#182135,#182136,#182137,#182138,
#182139,#182140,#182141,#182142,#182143,#182144,#182145,#182146,#182147,
#182148,#182149,#182150,#182151,#182152,#182153,#182154,#182155,#182156,
#182157,#182158,#182159,#182160,#182161,#182162,#182163,#182164,#182165,
#182166,#182167,#182168,#182169,#182170,#182171,#182172,#182173,#182174,
#182175,#182176,#182177,#182178,#182179,#182180,#182181,#182182,#182183,
#182184,#182185,#182186)),.UNSPECIFIED.,.F.,.F.,.F.)
B_SPLINE_SURFACE_WITH_KNOTS((2,2),(3,2,2,2,2,2,2,2,2,2,2,2,2,2,2,2,2,2,
2,2,2,2,2,2,2,2,2,2,2,2,2,2,2,2,2,2,2,2,2,2,2,2,2,2,2,2,2,2,2,2,2,2,2,2,
2,2,2,2,2,2,2,2,2,2,2,2,2,2,2,2,2,2,2,2,2,2,2,2,2,2,2,2,2,2,2,2,2,2,2,2,
2,2,2,2,2,2,2,2,2,2,2,2,2,2,2,2,2,2,2,2,2,2,2,2,2,2,2,2,2,2,2,3),(0.,1.),
(0.,0.0078125,0.015625,0.0234375,0.03125,0.0390625,0.046875,0.0546875,0.0625,
0.0703125,0.078125,0.0859375,0.09375,0.1015625,0.109375,0.1171875,0.125,
0.1328125,0.140625,0.1484375,0.15625,0.1640625,0.171875,0.1796875,0.1875,
0.1953125,0.203125,0.2109375,0.21875,0.2265625,0.234375,0.2421875,0.25,
0.2578125,0.265625,0.2734375,0.28125,0.2890625,0.296875,0.3046875,0.3125,
0.3203125,0.328125,0.3359375,0.34375,0.3515625,0.359375,0.3671875,0.375,
0.3828125,0.390625,0.3984375,0.40625,0.4140625,0.421875,0.4296875,0.4375,
0.4453125,0.453125,0.4609375,0.46875,0.4765625,0.484375,0.4921875,0.5,0.5078125,
0.515625,0.5234375,0.53125,0.5390625,0.546875,0.5546875,0.5625,0.5703125,
0.578125,0.5859375,0.59375,0.6015625,0.609375,0.6171875,0.625,0.6328125,
0.640625,0.6484375,0.65625,0.6640625,0.671875,0.6796875,0.6875,0.6953125,
0.703125,0.7109375,0.71875,0.7265625,0.734375,0.7421875,0.75,0.7578125,
0.765625,0.7734375,0.78125,0.7890625,0.796875,0.8046875,0.8125,0.8203125,
0.828125,0.8359375,0.84375,0.8515625,0.859375,0.8671875,0.875,0.8828125,
0.890625,0.8984375,0.90625,0.9140625,0.921875,0.9296875,0.9375,0.944992787595834),
 .UNSPECIFIED.)
GEOMETRIC_REPRESENTATION_ITEM()
RATIONAL_B_SPLINE_SURFACE(((1.,0.923879532511287,1.,0.923879532511287,1.,
0.923879532511287,1.,0.923879532511287,1.,0.923879532511287,1.,0.923879532511287,
1.,0.923879532511287,1.,0.923879532511287,1.,0.923879532511287,1.,0.923879532511287,
1.,0.923879532511287,1.,0.923879532511287,1.,0.923879532511287,1.,0.923879532511287,
1.,0.923879532511287,1.,0.923879532511287,1.,0.923879532511287,1.,0.923879532511287,
1.,0.923879532511287,1.,0.923879532511287,1.,0.923879532511287,1.,0.923879532511287,
1.,0.923879532511287,1.,0.923879532511287,1.,0.923879532511287,1.,0.923879532511287,
1.,0.923879532511287,1.,0.923879532511287,1.,0.923879532511287,1.,0.923879532511287,
1.,0.923879532511287,1.,0.923879532511287,1.,0.923879532511287,1.,0.923879532511287,
1.,0.923879532511287,1.,0.923879532511287,1.,0.923879532511287,1.,0.923879532511287,
1.,0.923879532511287,1.,0.923879532511287,1.,0.923879532511287,1.,0.923879532511287,
1.,0.923879532511287,1.,0.923879532511287,1.,0.923879532511287,1.,0.923879532511287,
1.,0.923879532511287,1.,0.923879532511287,1.,0.923879532511287,1.,0.923879532511287,
1.,0.923879532511287,1.,0.923879532511287,1.,0.923879532511287,1.,0.923879532511287,
1.,0.923879532511287,1.,0.923879532511287,1.,0.923879532511287,1.,0.923879532511287,
1.,0.923879532511287,1.,0.923879532511287,1.,0.923879532511287,1.,0.923879532511287,
1.,0.923879532511287,1.,0.923879532511287,1.,0.923879532511287,1.,0.923879532511287,
[truncated: 20,725,537 more chars]
