# Supplementary material for: De novo Powered Air-Purifying Respirator Design and Fabrication for Pandemic Response
Source: medRxiv preprint, doi:10.1101/2021.03.25.21252076, version 1 (2021-03-29)
Supplement: Supplementary Material 4 [file 252076_file05.zip › Supplementary Material 4/Custom Arduino Shield Design/DESCRIPTION]

<B>PanFAB PAPR Arduino Shield </B>

<p>
A simple Arduino-Uno shield which provides the functionality for the PanFAB PAPR Prototype.
</p>
